# Supplementary material for: Genome-wide association analyses in dairy heifers highlight genes overlapping with mouse and human fertility and human health traits
Source: Research Square preprint supplement (doi:10.21203/rs.3.rs-6463477/v1), 2025-05-05
Supplement: Supplementary file 2 [file 1bc1551ec013f087e6903ba5.xlsx]

## Sheet: health_preg_results_fisher
Additional file 6. Results of infertility-health analysis.
Fisher allelic test										Fisher dominance test of the reference alleale									Fisher recessive test of the reference alleale
CHR	SNP	BP	A1	F_A	F_U	A2	P	OR		CHR	SNP	A1	A2	TEST	AFF	UNAFF	P		CHR	SNP	A1	A2	TEST	AFF	UNAFF	P
1	BovineHD0100000005	655346	1	0.5	0.4241	2	0.3011	1.358		1	BovineHD0100000005	1	2	DOM	16/9	184/86	0.6602		1	BovineHD0100000005	1	2	REC	9/16	45/225	0.02738
1	BovineHD0100000026	719789	2	0.5208	0.4852	1	0.6543	1.153		1	BovineHD0100000026	2	1	DOM	17/7	205/66	0.6237		1	BovineHD0100000026	2	1	REC	8/16	58/213	0.2016
1	BovineHD0100000035	761316	2	0.42	0.3672	1	0.4498	1.248		1	BovineHD0100000035	2	1	DOM	15/10	161/110	1		1	BovineHD0100000035	2	1	REC	6/19	38/233	0.2336
1	Hapmap43437-BTA-101873	776231	1	0.48	0.4225	2	0.4574	1.262		1	Hapmap43437-BTA-101873	1	2	DOM	16/9	185/86	0.6593		1	Hapmap43437-BTA-101873	1	2	REC	8/17	44/227	0.05681
1	BovineHD0100000051	805126	1	0.54	0.4667	2	0.3749	1.342		1	BovineHD0100000051	1	2	DOM	19/6	198/72	1		1	BovineHD0100000051	1	2	REC	8/17	54/216	0.1968
1	BovineHD0100000057	824172	1	0.46	0.3241	2	0.06029	1.777		1	BovineHD0100000057	1	2	DOM	17/8	146/124	0.211		1	BovineHD0100000057	1	2	REC	6/19	29/241	0.09595
1	BovineHD0100000066	842891	2	0.4783	0.4086	1	0.3552	1.327		1	BovineHD0100000066	2	1	DOM	16/7	171/97	0.6559		1	BovineHD0100000066	2	1	REC	6/17	48/220	0.3989
1	BovineHD0100000064	849544	1	0.4792	0.3685	2	0.1614	1.576		1	BovineHD0100000064	1	2	DOM	17/7	161/109	0.384		1	BovineHD0100000064	1	2	REC	6/18	38/232	0.226
1	BovineHD0100000067	858145	2	0.375	0.2768	1	0.1809	1.568		1	BovineHD0100000067	2	1	DOM	14/10	130/141	0.3964		1	BovineHD0100000067	2	1	REC	4/20	20/251	0.1178
1	ARS-BFGL-NGS-16466	907810	2	0.1	0.09225	1	0.8	1.093		1	ARS-BFGL-NGS-16466	2	1	DOM	5/20	49/222	0.7886		1	ARS-BFGL-NGS-16466	2	1	REC	0/25	1/270	1
1	BovineHD0100000077	914796	1	0.1087	0.1157	2	1	0.9323		1	BovineHD0100000077	1	2	DOM	5/18	60/208	1		1	BovineHD0100000077	1	2	REC	0/23	2/266	1
1	BovineHD0100000079	918822	1	0.1042	0.1222	2	1	0.8351		1	BovineHD0100000079	1	2	DOM	5/19	64/206	1		1	BovineHD0100000079	1	2	REC	0/24	2/268	1
1	BovineHD0100000081	928563	2	0.1087	0.1157	1	1	0.9323		1	BovineHD0100000081	2	1	DOM	5/18	60/208	1		1	BovineHD0100000081	2	1	REC	0/23	2/266	1
1	BovineHD0100000082	930560	1	0.42	0.4093	2	0.8817	1.045		1	BovineHD0100000082	1	2	DOM	17/8	168/102	0.6683		1	BovineHD0100000082	1	2	REC	4/21	53/217	0.7957
1	BovineHD0100000106	1001634	2	0.04167	0.137	1	0.07027	0.2738		1	BovineHD0100000106	2	1	DOM	2/22	66/204	0.08057		1	BovineHD0100000106	2	1	REC	0/24	8/262	1
1	BovineHD0100000110	1016283	2	0.0625	0.187	1	0.02916	0.2898		1	BovineHD0100000110	2	1	DOM	3/21	90/180	0.03915		1	BovineHD0100000110	2	1	REC	0/24	11/259	0.6088
1	Hapmap34944-BES1_Contig627_1906	1032564	2	0.46	0.3137	1	0.04051	1.864		1	Hapmap34944-BES1_Contig627_1906	2	1	DOM	17/8	142/129	0.1478		1	Hapmap34944-BES1_Contig627_1906	2	1	REC	6/19	28/243	0.05134
1	BovineHD0100000136	1052361	2	0.2292	0.4389	1	0.005594	0.3801		1	BovineHD0100000136	2	1	DOM	11/13	186/84	0.03894		1	BovineHD0100000136	2	1	REC	0/24	51/219	0.01137
1	BovineHD0100000137	1055397	1	0.08696	0.0653	2	0.5373	1.363		1	BovineHD0100000137	1	2	DOM	4/19	34/234	0.5185		1	BovineHD0100000137	1	2	REC	0/23	1/267	1
1	BovineHD0100000151	1091658	1	0.0625	0.2333	2	0.005455	0.219		1	BovineHD0100000151	1	2	DOM	3/21	117/153	0.003921		1	BovineHD0100000151	1	2	REC	0/24	9/261	1
1	BovineHD0100000155	1098033	2	0.4375	0.45	1	0.8811	0.9506		1	BovineHD0100000155	2	1	DOM	16/8	193/77	0.6413		1	BovineHD0100000155	2	1	REC	5/19	50/220	0.7857
1	BovineHD0100000161	1104577	2	0.0625	0.2333	1	0.005455	0.219		1	BovineHD0100000161	2	1	DOM	3/21	117/153	0.003921		1	BovineHD0100000161	2	1	REC	0/24	9/261	1
1	ARS-BFGL-NGS-98142	1110393	2	0.48	0.3801	1	0.1747	1.506		1	ARS-BFGL-NGS-98142	2	1	DOM	18/7	166/105	0.3894		1	ARS-BFGL-NGS-98142	2	1	REC	6/19	40/231	0.2463
1	BovineHD0100000166	1112539	2	0.0625	0.2333	1	0.005455	0.219		1	BovineHD0100000166	2	1	DOM	3/21	117/153	0.003921		1	BovineHD0100000166	2	1	REC	0/24	9/261	1
1	BovineHD0100000170	1126372	1	0.16	0.4037	2	0.0006723	0.2813		1	BovineHD0100000170	1	2	DOM	8/17	179/91	0.000991		1	BovineHD0100000170	1	2	REC	0/25	39/231	0.05658
1	Hapmap53946-rs29015852	1150763	2	0.1	0.1734	1	0.2352	0.5296		1	Hapmap53946-rs29015852	2	1	DOM	5/20	85/186	0.2666		1	Hapmap53946-rs29015852	2	1	REC	0/25	9/262	1
1	BovineHD0100000183	1188534	2	0.12	0.213	1	0.1436	0.504		1	BovineHD0100000183	2	1	DOM	6/19	101/169	0.2007		1	BovineHD0100000183	2	1	REC	0/25	14/256	0.6173
1	BovineHD0100000200	1235550	2	0.5208	0.474	1	0.55	1.206		1	BovineHD0100000200	2	1	DOM	18/6	193/76	0.8169		1	BovineHD0100000200	2	1	REC	7/17	62/207	0.4624
1	BovineHD0100000221	1375784	2	0.1	0.1667	1	0.313	0.5556		1	BovineHD0100000221	2	1	DOM	5/20	82/188	0.3617		1	BovineHD0100000221	2	1	REC	0/25	8/262	1
1	BovineHD0100000231	1406817	2	0.1	0.1722	1	0.2352	0.5341		1	BovineHD0100000231	2	1	DOM	5/20	84/186	0.362		1	BovineHD0100000231	2	1	REC	0/25	9/261	1
1	BovineHD0100000234	1416198	2	0.3958	0.3489	1	0.5306	1.223		1	BovineHD0100000234	2	1	DOM	14/10	157/111	1		1	BovineHD0100000234	2	1	REC	5/19	30/238	0.1843
1	BovineHD0100000242	1459085	1	0.4	0.4033	2	1	0.9862		1	BovineHD0100000242	1	2	DOM	15/10	178/91	0.5183		1	BovineHD0100000242	1	2	REC	5/20	39/230	0.5551
1	BovineHD0100000244	1469010	2	0.02	0.1365	1	0.01314	0.1291		1	BovineHD0100000244	2	1	DOM	1/24	72/199	0.01298		1	BovineHD0100000244	2	1	REC	0/25	2/269	1
1	BovineHD0100000252	1523007	1	0.4583	0.4742	2	0.8809	0.9383		1	BovineHD0100000252	1	2	DOM	16/8	190/81	0.8169		1	BovineHD0100000252	1	2	REC	6/18	67/204	1
1	BovineHD0100000257	1540641	2	0.1667	0.3093	1	0.04698	0.4467		1	BovineHD0100000257	2	1	DOM	8/16	140/130	0.09173		1	BovineHD0100000257	2	1	REC	0/24	27/243	0.1449
1	BovineHD0100000261	1556392	1	0.52	0.3759	2	0.04958	1.798		1	BovineHD0100000261	1	2	DOM	18/7	166/104	0.3895		1	BovineHD0100000261	1	2	REC	8/17	37/233	0.03543
1	BovineHD0100000280	1587057	1	0.5	0.4241	2	0.3618	1.358		1	BovineHD0100000280	1	2	DOM	17/7	180/90	0.822		1	BovineHD0100000280	1	2	REC	7/17	49/221	0.1838
1	ARS-BFGL-NGS-65067	1604940	1	0.12	0.3579	2	0.0004675	0.2446		1	ARS-BFGL-NGS-65067	1	2	DOM	6/19	160/111	0.001159		1	ARS-BFGL-NGS-65067	1	2	REC	0/25	34/237	0.0925
1	BovineHD0100000293	1621844	1	0.46	0.4111	2	0.5496	1.22		1	BovineHD0100000293	1	2	DOM	17/8	175/95	0.8293		1	BovineHD0100000293	1	2	REC	6/19	47/223	0.4163
1	BovineHD0100000296	1625016	2	0.4348	0.4176	1	0.8767	1.073		1	BovineHD0100000296	2	1	DOM	14/9	182/85	0.4912		1	BovineHD0100000296	2	1	REC	6/17	41/226	0.2323
1	BovineHD0100000297	1627573	1	0.22	0.2407	2	0.863	0.8895		1	BovineHD0100000297	1	2	DOM	11/14	113/157	0.8355		1	BovineHD0100000297	1	2	REC	0/25	17/253	0.3774
1	ARS-BFGL-BAC-34682	1671886	2	0	0.0572	1	0.09835	0		1	ARS-BFGL-BAC-34682	2	1	DOM	0/25	31/240	0.08914		1	ARS-BFGL-BAC-34682	2	1	REC	0/25	0/271	1
1	BovineHD0100000319	1685880	2	0.2292	0.3815	1	0.04196	0.482		1	BovineHD0100000319	2	1	DOM	11/13	165/105	0.1916		1	BovineHD0100000319	2	1	REC	0/24	41/229	0.03283
1	ARS-BFGL-NGS-98203	1730547	1	0.5	0.4686	2	0.7675	1.134		1	ARS-BFGL-NGS-98203	1	2	DOM	18/7	191/80	1		1	ARS-BFGL-NGS-98203	1	2	REC	7/18	63/208	0.6241
1	BovineHD0100000344	1761967	2	0.4375	0.4685	1	0.7633	0.8823		1	BovineHD0100000344	2	1	DOM	16/8	187/83	0.8194		1	BovineHD0100000344	2	1	REC	5/19	66/204	0.8075
1	BovineHD0100000350	1784777	2	0.3958	0.4114	1	0.8793	0.9372		1	BovineHD0100000350	2	1	DOM	15/9	169/102	1		1	BovineHD0100000350	2	1	REC	4/20	54/217	1
1	BovineHD0100000354	1802755	2	0.4792	0.4778	1	1	1.006		1	BovineHD0100000354	2	1	DOM	17/7	192/78	1		1	BovineHD0100000354	2	1	REC	6/18	66/204	1
1	BovineHD0100000360	1821203	1	0.1458	0.1866	2	0.564	0.7444		1	BovineHD0100000360	1	2	DOM	7/17	90/178	0.8219		1	BovineHD0100000360	1	2	REC	0/24	10/258	1
1	ARS-BFGL-BAC-2376	1834781	2	0.5	0.4502	1	0.5537	1.221		1	ARS-BFGL-BAC-2376	2	1	DOM	18/7	190/81	1		1	ARS-BFGL-BAC-2376	2	1	REC	7/18	54/217	0.3136
1	BovineHD0100000370	1852426	2	0.1042	0.1231	1	0.8211	0.828		1	BovineHD0100000370	2	1	DOM	5/19	64/204	1		1	BovineHD0100000370	2	1	REC	0/24	2/266	1
1	BovineHD0100000373	1863496	2	0.08333	0.1402	1	0.3784	0.5574		1	BovineHD0100000373	2	1	DOM	4/20	70/201	0.4616		1	BovineHD0100000373	2	1	REC	0/24	6/265	1
1	BovineHD0100000382	1917241	1	0.1458	0.3241	2	0.00907	0.3561		1	BovineHD0100000382	1	2	DOM	7/17	144/126	0.03175		1	BovineHD0100000382	1	2	REC	0/24	31/239	0.08985
1	BovineHD0100000391	1968406	1	0.5208	0.3963	2	0.1244	1.656		1	BovineHD0100000391	1	2	DOM	17/7	176/94	0.6588		1	BovineHD0100000391	1	2	REC	8/16	38/232	0.03405
1	ARS-BFGL-BAC-7196	1984725	2	0.1	0.04428	1	0.08794	2.398		1	ARS-BFGL-BAC-7196	2	1	DOM	5/20	24/247	0.08243		1	ARS-BFGL-BAC-7196	2	1	REC	0/25	0/271	1
1	ARS-BFGL-BAC-12931	2008865	1	0.14	0.1125	2	0.4942	1.284		1	ARS-BFGL-BAC-12931	1	2	DOM	7/18	55/216	0.4393		1	ARS-BFGL-BAC-12931	1	2	REC	0/25	6/265	1
1	BovineHD0100000402	2010236	1	0.4792	0.2889	2	0.008451	2.265		1	BovineHD0100000402	1	2	DOM	16/8	138/132	0.2002		1	BovineHD0100000402	1	2	REC	7/17	18/252	0.001788
1	BovineHD0100000406	2024917	1	0.52	0.3519	2	0.0214	1.996		1	BovineHD0100000406	1	2	DOM	18/7	157/113	0.2063		1	BovineHD0100000406	1	2	REC	8/17	33/237	0.0125
1	ARS-BFGL-BAC-14857	2058539	2	0.46	0.2841	1	0.01456	2.146		1	ARS-BFGL-BAC-14857	2	1	DOM	16/9	138/133	0.2955		1	ARS-BFGL-BAC-14857	2	1	REC	7/18	16/255	0.001288
1	Hapmap53766-ss46526150	2082139	2	0.52	0.428	1	0.2343	1.448		1	Hapmap53766-ss46526150	2	1	DOM	18/7	181/90	0.6626		1	Hapmap53766-ss46526150	2	1	REC	8/17	51/220	0.1211
1	BovineHD0100000426	2086121	2	0.125	0.1852	1	0.4319	0.6286		1	BovineHD0100000426	2	1	DOM	6/18	89/181	0.5007		1	BovineHD0100000426	2	1	REC	0/24	11/259	0.6088
1	ARS-BFGL-NGS-115971	2107796	2	0.52	0.441	1	0.3008	1.373		1	ARS-BFGL-NGS-115971	2	1	DOM	17/8	182/89	1		1	ARS-BFGL-NGS-115971	2	1	REC	9/16	57/214	0.1278
1	BovineHD0100000434	2119684	1	0.08333	0.1759	2	0.1103	0.4258		1	BovineHD0100000434	1	2	DOM	4/20	87/183	0.1655		1	BovineHD0100000434	1	2	REC	0/24	8/262	1
1	BovineHD0100000436	2128341	2	0.0625	0.06134	1	1	1.02		1	BovineHD0100000436	2	1	DOM	3/21	31/238	0.7484		1	BovineHD0100000436	2	1	REC	0/24	2/267	1
1	ARS-BFGL-NGS-62826	2158691	2	0.08	0.06089	1	0.5417	1.341		1	ARS-BFGL-NGS-62826	2	1	DOM	4/21	31/240	0.5148		1	ARS-BFGL-NGS-62826	2	1	REC	0/25	2/269	1
1	BovineHD0100000445	2172213	1	0.0625	0.2037	2	0.01309	0.2606		1	BovineHD0100000445	1	2	DOM	3/21	100/170	0.0144		1	BovineHD0100000445	1	2	REC	0/24	10/260	1
1	BovineHD0100000449	2192489	2	0.5	0.476	1	0.7652	1.101		1	BovineHD0100000449	2	1	DOM	16/8	191/80	0.8162		1	BovineHD0100000449	2	1	REC	8/16	67/204	0.3382
1	BovineHD0100000455	2214296	2	0.1458	0.3537	1	0.003659	0.312		1	BovineHD0100000455	2	1	DOM	6/18	158/112	0.002147		1	BovineHD0100000455	2	1	REC	1/23	33/237	0.3318
1	BovineHD0100000459	2229077	2	0.4792	0.3741	1	0.1646	1.539		1	BovineHD0100000459	2	1	DOM	15/9	170/100	1		1	BovineHD0100000459	2	1	REC	8/16	32/238	0.008242
1	BTA-39394-no-rs	2235492	1	0.12	0.1771	2	0.4326	0.6335		1	BTA-39394-no-rs	1	2	DOM	6/19	88/183	0.5023		1	BTA-39394-no-rs	1	2	REC	0/25	8/263	1
1	BovineHD0100000488	2279667	1	0.46	0.363	2	0.2205	1.495		1	BovineHD0100000488	1	2	DOM	17/8	160/110	0.5229		1	BovineHD0100000488	1	2	REC	6/19	36/234	0.1431
1	BovineHD0100000504	2299194	1	0.18	0.2907	2	0.1026	0.5355		1	BovineHD0100000504	1	2	DOM	9/16	134/136	0.2148		1	BovineHD0100000504	1	2	REC	0/25	23/247	0.2371
1	ARS-BFGL-NGS-105306	2305128	1	0.2	0.2934	2	0.1916	0.6022		1	ARS-BFGL-NGS-105306	1	2	DOM	10/15	135/136	0.4062		1	ARS-BFGL-NGS-105306	1	2	REC	0/25	24/247	0.2411
1	BovineHD0100000526	2374280	1	0.1667	0.1426	2	0.6679	1.203		1	BovineHD0100000526	1	2	DOM	8/16	71/199	0.4745		1	BovineHD0100000526	1	2	REC	0/24	6/264	1
1	BovineHD0100000531	2379674	2	0.1667	0.1759	1	1	0.9368		1	BovineHD0100000531	2	1	DOM	8/16	86/184	1		1	BovineHD0100000531	2	1	REC	0/24	9/261	1
1	ARS-BFGL-NGS-39992	2391777	1	0.16	0.1827	2	0.848	0.8523		1	ARS-BFGL-NGS-39992	1	2	DOM	8/17	90/181	1		1	ARS-BFGL-NGS-39992	1	2	REC	0/25	9/262	1
1	ARS-BFGL-BAC-13059	2482685	1	0.02	0.04797	2	0.7187	0.405		1	ARS-BFGL-BAC-13059	1	2	DOM	1/24	25/246	0.7095		1	ARS-BFGL-BAC-13059	1	2	REC	0/25	1/270	1
1	ARS-BFGL-NGS-11433	2574098	1	0.36	0.214	2	0.02222	2.066		1	ARS-BFGL-NGS-11433	1	2	DOM	14/11	105/166	0.1341		1	ARS-BFGL-NGS-11433	1	2	REC	4/21	11/260	0.0287
1	ARS-BFGL-NGS-25183	2617150	1	0.46	0.2583	2	0.004333	2.446		1	ARS-BFGL-NGS-25183	1	2	DOM	16/9	125/146	0.0973		1	ARS-BFGL-NGS-25183	1	2	REC	7/18	15/256	0.0009495
1	ARS-BFGL-BAC-7317	2703664	1	0.36	0.214	2	0.02222	2.066		1	ARS-BFGL-BAC-7317	1	2	DOM	14/11	105/166	0.1341		1	ARS-BFGL-BAC-7317	1	2	REC	4/21	11/260	0.0287
1	ARS-BFGL-NGS-29653	2769164	1	0.42	0.3007	2	0.1091	1.684		1	ARS-BFGL-NGS-29653	1	2	DOM	16/9	138/133	0.2955		1	ARS-BFGL-NGS-29653	1	2	REC	5/20	25/246	0.1544
1	BTA-120704-no-rs	2848684	1	0.2	0.1863	2	0.8498	1.092		1	BTA-120704-no-rs	1	2	DOM	10/15	92/179	0.6605		1	BTA-120704-no-rs	1	2	REC	0/25	9/262	1
1	BovineHD0100000671	2952000	2	0.02	0.03148	1	1	0.6279		1	BovineHD0100000671	2	1	DOM	1/24	17/253	1		1	BovineHD0100000671	2	1	REC	0/25	0/270	1
1	BovineHD0100000681	2981856	1	0.18	0.3407	2	0.02634	0.4247		1	BovineHD0100000681	1	2	DOM	9/16	150/120	0.09176		1	BovineHD0100000681	1	2	REC	0/25	34/236	0.09276
1	BovineHD0100000687	2996976	2	0.04167	0.1648	1	0.02091	0.2203		1	BovineHD0100000687	2	1	DOM	2/22	83/187	0.01868		1	BovineHD0100000687	2	1	REC	0/24	6/264	1
1	ARS-BFGL-NGS-115671	3033433	2	0.12	0.3708	1	0.0002754	0.2313		1	ARS-BFGL-NGS-115671	2	1	DOM	6/19	163/108	0.0005849		1	ARS-BFGL-NGS-115671	2	1	REC	0/25	38/233	0.05497
1	BovineHD0100000719	3058587	1	0.2	0.2741	2	0.3174	0.6622		1	BovineHD0100000719	1	2	DOM	9/16	126/144	0.4021		1	BovineHD0100000719	1	2	REC	1/24	22/248	0.7051
1	BovineHD0100000722	3061615	1	0.16	0.1852	2	0.8483	0.8381		1	BovineHD0100000722	1	2	DOM	8/17	90/180	1		1	BovineHD0100000722	1	2	REC	0/25	10/260	1
1	ARS-BFGL-NGS-21352	3135408	2	0.4	0.3764	1	0.7619	1.105		1	ARS-BFGL-NGS-21352	2	1	DOM	15/10	162/109	1		1	ARS-BFGL-NGS-21352	2	1	REC	5/20	42/229	0.5676
1	BovineHD4100000021	3172295	2	0.125	0.1741	1	0.5466	0.6778		1	BovineHD4100000021	2	1	DOM	6/18	86/184	0.6469		1	BovineHD4100000021	2	1	REC	0/24	8/262	1
1	ARS-BFGL-NGS-103391	3182687	2	0.06	0.1458	1	0.1311	0.3741		1	ARS-BFGL-NGS-103391	2	1	DOM	3/22	71/200	0.1492		1	ARS-BFGL-NGS-103391	2	1	REC	0/25	8/263	1
1	BovineHD0100000805	3192208	1	0.5	0.4033	2	0.2212	1.479		1	BovineHD0100000805	1	2	DOM	17/7	176/93	0.6597		1	BovineHD0100000805	1	2	REC	7/17	41/228	0.08703
1	BovineHD0100000807	3195861	1	0.5	0.4056	2	0.2227	1.466		1	BovineHD0100000807	1	2	DOM	17/7	177/93	0.6603		1	BovineHD0100000807	1	2	REC	7/17	42/228	0.09249
1	ARS-BFGL-NGS-22858	3245141	2	0.08	0.1679	1	0.1557	0.431		1	ARS-BFGL-NGS-22858	2	1	DOM	4/21	85/186	0.1694		1	ARS-BFGL-NGS-22858	2	1	REC	0/25	6/265	1
1	BovineHD0100000837	3264758	1	0.1	0.2127	2	0.06562	0.4113		1	BovineHD0100000837	1	2	DOM	5/20	103/165	0.08321		1	BovineHD0100000837	1	2	REC	0/25	11/257	0.6075
1	BovineHD4100000025	3279233	2	0.08	0.1617	1	0.1536	0.4508		1	BovineHD4100000025	2	1	DOM	4/21	75/194	0.2442		1	BovineHD4100000025	2	1	REC	0/25	12/257	0.6082
1	BovineHD0100000857	3315582	1	0.12	0.1554	2	0.6804	0.741		1	BovineHD0100000857	1	2	DOM	5/20	75/192	0.486		1	BovineHD0100000857	1	2	REC	1/24	8/259	0.5584
1	BovineHD0100000861	3339918	2	0.42	0.3265	1	0.2098	1.494		1	BovineHD0100000861	2	1	DOM	15/10	144/124	0.6757		1	BovineHD0100000861	2	1	REC	6/19	31/237	0.1064
1	BovineHD0100000876	3387354	2	0.4783	0.4335	1	0.6424	1.198		1	BovineHD0100000876	2	1	DOM	16/7	179/84	1		1	BovineHD0100000876	2	1	REC	6/17	49/214	0.4083
1	BovineHD0100000878	3389765	2	0.48	0.4366	1	0.5555	1.191		1	BovineHD0100000878	2	1	DOM	17/8	184/84	1		1	BovineHD0100000878	2	1	REC	7/18	50/218	0.2897
1	BovineHD0100000895	3433143	1	0.48	0.4345	2	0.5539	1.202		1	BovineHD0100000895	1	2	DOM	17/8	185/82	1		1	BovineHD0100000895	1	2	REC	7/18	47/220	0.2774
1	ARS-BFGL-NGS-58892	3434539	1	0.44	0.3358	2	0.1615	1.554		1	ARS-BFGL-NGS-58892	1	2	DOM	16/9	150/121	0.5284		1	ARS-BFGL-NGS-58892	1	2	REC	6/19	32/239	0.1103
1	BovineHD0100000905	3462385	1	0.2	0.3843	2	0.009134	0.4005		1	BovineHD0100000905	1	2	DOM	10/15	168/100	0.03238		1	BovineHD0100000905	1	2	REC	0/25	38/230	0.05533
1	ARS-BFGL-NGS-98287	3470316	2	0.1	0.3063	1	0.001639	0.2517		1	ARS-BFGL-NGS-98287	2	1	DOM	5/20	142/129	0.00275		1	ARS-BFGL-NGS-98287	2	1	REC	0/25	24/247	0.2411
1	BTB-00001612	3492221	2	0.1	0.131	1	0.6615	0.7371		1	BTB-00001612	2	1	DOM	5/20	70/201	0.6356		1	BTB-00001612	2	1	REC	0/25	1/270	1
1	BovineHD0100000930	3504642	1	0.2	0.3848	2	0.009102	0.3998		1	BovineHD0100000930	1	2	DOM	10/15	165/104	0.05363		1	BovineHD0100000930	1	2	REC	0/25	42/227	0.03255
1	ARS-BFGL-NGS-15775	3560291	2	0.04	0.06642	1	0.7612	0.5856		1	ARS-BFGL-NGS-15775	2	1	DOM	2/23	34/237	0.7508		1	ARS-BFGL-NGS-15775	2	1	REC	0/25	2/269	1
1	BovineHD0100000956	3579296	1	0.08	0.1343	2	0.3786	0.5604		1	BovineHD0100000956	1	2	DOM	4/21	67/201	0.464		1	BovineHD0100000956	1	2	REC	0/25	5/263	1
1	ARS-BFGL-NGS-59192	3599891	2	0.02	0.02037	1	1	0.9814		1	ARS-BFGL-NGS-59192	2	1	DOM	1/24	11/259	1		1	ARS-BFGL-NGS-59192	2	1	REC	0/25	0/270	1
1	BovineHD0100000971	3611248	2	0.28	0.5075	1	0.002777	0.3775		1	BovineHD0100000971	2	1	DOM	13/12	205/63	0.01424		1	BovineHD0100000971	2	1	REC	1/24	67/201	0.01316
1	BovineHD0100000973	3616076	2	0.18	0.3606	1	0.0121	0.3892		1	BovineHD0100000973	2	1	DOM	9/16	167/102	0.01742		1	BovineHD0100000973	2	1	REC	0/25	27/242	0.1454
1	BTB-00001299	3653664	2	0.1	0.238	1	0.03236	0.3557		1	BTB-00001299	2	1	DOM	5/20	115/156	0.03306		1	BTB-00001299	2	1	REC	0/25	14/257	0.617
1	BovineHD0100046373	3667130	1	0.06	0.08868	2	0.7905	0.656		1	BovineHD0100046373	1	2	DOM	3/22	43/222	0.7772		1	BovineHD0100046373	1	2	REC	0/25	4/261	1
1	ARS-BFGL-NGS-37412	3687775	2	0.26	0.4336	1	0.01697	0.459		1	ARS-BFGL-NGS-37412	2	1	DOM	13/12	185/86	0.1201		1	ARS-BFGL-NGS-37412	2	1	REC	0/25	50/221	0.01135
1	BovineHD0100001003	3701702	1	0.18	0.1766	2	1	1.024		1	BovineHD0100001003	1	2	DOM	9/16	84/185	0.6555		1	BovineHD0100001003	1	2	REC	0/25	11/258	0.6076
1	BovineHD4100000029	3704712	2	0.12	0.2823	1	0.01201	0.3467		1	BovineHD4100000029	2	1	DOM	5/20	132/139	0.006116		1	BovineHD4100000029	2	1	REC	1/24	21/250	0.7062
1	BovineHD0100001009	3717415	1	0.26	0.5168	2	0.0005691	0.3285		1	BovineHD0100001009	1	2	DOM	12/13	207/61	0.002915		1	BovineHD0100001009	1	2	REC	1/24	70/198	0.01272
1	ARS-BFGL-NGS-16784	3721639	1	0.06	0.07749	2	1	0.7599		1	ARS-BFGL-NGS-16784	1	2	DOM	3/22	40/231	1		1	ARS-BFGL-NGS-16784	1	2	REC	0/25	2/269	1
1	BTB-00001074	3826765	2	0.46	0.4815	1	0.8826	0.9171		1	BTB-00001074	2	1	DOM	17/8	193/78	0.8183		1	BTB-00001074	2	1	REC	6/19	68/203	1
1	BovineHD0100001041	3840517	2	0.08	0.1835	1	0.07831	0.3869		1	BovineHD0100001041	2	1	DOM	3/22	91/176	0.02482		1	BovineHD0100001041	2	1	REC	1/24	7/260	0.5158
1	BovineHD0100001043	3849812	1	0.06	0.21	2	0.008549	0.2401		1	BovineHD0100001043	1	2	DOM	3/22	99/170	0.01433		1	BovineHD0100001043	1	2	REC	0/25	14/255	0.6175
1	ARS-BFGL-NGS-43924	3859505	2	0.26	0.3247	1	0.4285	0.7307		1	ARS-BFGL-NGS-43924	2	1	DOM	13/12	145/126	1		1	ARS-BFGL-NGS-43924	2	1	REC	0/25	31/240	0.08914
1	BovineHD0100001045	3861516	1	0.32	0.2566	2	0.3181	1.364		1	BovineHD0100001045	1	2	DOM	15/10	117/150	0.143		1	BovineHD0100001045	1	2	REC	1/24	20/247	1
1	BovineHD0100001052	3888198	1	0.18	0.3228	2	0.03814	0.4606		1	BovineHD0100001052	1	2	DOM	8/17	142/126	0.05885		1	BovineHD0100001052	1	2	REC	1/24	31/237	0.4972
1	ARS-BFGL-NGS-30999	3908027	2	0.46	0.4151	1	0.552	1.2		1	ARS-BFGL-NGS-30999	2	1	DOM	19/6	179/92	0.3791		1	ARS-BFGL-NGS-30999	2	1	REC	4/21	46/225	1
1	ARS-USMARC-Parent-DQ381153-rs29012842	3958867	2	0.42	0.3339	1	0.2172	1.444		1	ARS-USMARC-Parent-DQ381153-rs29012842	2	1	DOM	17/8	152/119	0.295		1	ARS-USMARC-Parent-DQ381153-rs29012842	2	1	REC	4/21	29/242	0.501
1	BovineHD0100001083	3973178	2	0.12	0.1098	1	0.8135	1.105		1	BovineHD0100001083	2	1	DOM	5/20	55/209	1		1	BovineHD0100001083	2	1	REC	1/24	3/261	0.305
1	BovineHD0100001088	3989772	2	0.04	0.08022	1	0.4129	0.4777		1	BovineHD0100001088	2	1	DOM	2/23	40/228	0.5501		1	BovineHD0100001088	2	1	REC	0/25	3/265	1
1	BovineHD0100001098	4027625	1	0.22	0.4216	2	0.006232	0.3869		1	BovineHD0100001098	1	2	DOM	10/15	175/93	0.01647		1	BovineHD0100001098	1	2	REC	1/24	51/217	0.09505
1	ARS-BFGL-NGS-107481	4052172	2	0.44	0.2907	1	0.03593	1.917		1	ARS-BFGL-NGS-107481	2	1	DOM	18/7	131/139	0.03501		1	ARS-BFGL-NGS-107481	2	1	REC	4/21	26/244	0.3007
1	BovineHD0100001109	4070299	2	0.12	0.1381	1	0.8324	0.8514		1	BovineHD0100001109	2	1	DOM	5/20	68/200	0.637		1	BovineHD0100001109	2	1	REC	1/24	6/262	0.468
1	BTA-31687-no-rs	4113357	2	0.42	0.3247	1	0.209	1.506		1	BTA-31687-no-rs	2	1	DOM	17/8	152/119	0.295		1	BTA-31687-no-rs	2	1	REC	4/21	24/247	0.2745
1	BovineHD0100001143	4155630	1	0.48	0.3937	2	0.2908	1.422		1	BovineHD0100001143	1	2	DOM	19/6	166/102	0.1969		1	BovineHD0100001143	1	2	REC	5/20	45/223	0.7803
1	BTA-32603-no-rs	4168130	2	0.04	0.06827	1	0.7632	0.5687		1	BTA-32603-no-rs	2	1	DOM	2/23	36/235	0.7534		1	BTA-32603-no-rs	2	1	REC	0/25	1/270	1
1	BovineHD0100001154	4181558	2	0	0.06716	1	0.06231	0		1	BovineHD0100001154	2	1	DOM	0/25	36/232	0.05398		1	BovineHD0100001154	2	1	REC	0/25	0/268	1
1	BovineHD0100001164	4224302	1	0.18	0.2973	2	0.1011	0.5187		1	BovineHD0100001164	1	2	DOM	8/17	130/134	0.1415		1	BovineHD0100001164	1	2	REC	1/24	27/237	0.4873
1	BovineHD0100001169	4238490	1	0.4783	0.4453	2	0.7576	1.142		1	BovineHD0100001169	1	2	DOM	17/6	186/79	0.8149		1	BovineHD0100001169	1	2	REC	5/18	50/215	0.7821
1	ARS-BFGL-NGS-69957	4250046	1	0.48	0.4317	2	0.5525	1.215		1	ARS-BFGL-NGS-69957	1	2	DOM	19/6	186/85	0.5057		1	ARS-BFGL-NGS-69957	1	2	REC	5/20	48/223	0.7858
1	BovineHD0100001174	4254712	2	0.42	0.3472	1	0.3532	1.362		1	BovineHD0100001174	2	1	DOM	16/9	154/111	0.673		1	BovineHD0100001174	2	1	REC	5/20	30/235	0.2021
1	BovineHD0100001177	4267089	2	0.14	0.1863	1	0.5654	0.7108		1	BovineHD0100001177	2	1	DOM	6/19	88/183	0.5023		1	BovineHD0100001177	2	1	REC	1/24	13/258	1
1	ARS-BFGL-NGS-43005	4276065	1	0.24	0.2528	2	1	0.9335		1	ARS-BFGL-NGS-43005	1	2	DOM	11/14	113/158	0.835		1	ARS-BFGL-NGS-43005	1	2	REC	1/24	24/247	0.7069
1	Hapmap59750-rs29024375	4309205	2	0.3	0.5129	1	0.00467	0.407		1	Hapmap59750-rs29024375	2	1	DOM	14/11	205/66	0.05332		1	Hapmap59750-rs29024375	2	1	REC	1/24	73/198	0.007624
1	BovineHD0100001215	4318690	1	0.02	0.04682	2	0.7164	0.4155		1	BovineHD0100001215	1	2	DOM	1/24	25/242	0.7104		1	BovineHD0100001215	1	2	REC	0/25	0/267	1
1	BTB-00002335	4335252	1	0	0.04428	2	0.2507	0		1	BTB-00002335	1	2	DOM	0/25	24/247	0.2411		1	BTB-00002335	1	2	REC	0/25	0/271	1
1	BovineHD0100001246	4418006	2	0.06	0.08209	1	0.7871	0.7137		1	BovineHD0100001246	2	1	DOM	3/22	42/226	0.7779		1	BovineHD0100001246	2	1	REC	0/25	2/266	1
1	ARS-BFGL-NGS-81011	4494007	2	0.34	0.2638	1	0.2474	1.437		1	ARS-BFGL-NGS-81011	2	1	DOM	15/10	124/147	0.2103		1	ARS-BFGL-NGS-81011	2	1	REC	2/23	19/252	0.6939
1	BovineHD0100001276	4509506	1	0.4	0.3937	2	1	1.027		1	BovineHD0100001276	1	2	DOM	16/9	166/102	1		1	BovineHD0100001276	1	2	REC	4/21	45/223	1
1	BTB-00003162	4547357	2	0.04	0.08487	1	0.4147	0.4493		1	BTB-00003162	2	1	DOM	2/23	44/227	0.3918		1	BTB-00003162	2	1	REC	0/25	2/269	1
1	BTB-00002966	4615149	2	0.44	0.2934	1	0.03706	1.893		1	BTB-00002966	2	1	DOM	18/7	134/137	0.03657		1	BTB-00002966	2	1	REC	4/21	25/246	0.2863
1	BTA-34568-no-rs	4729973	2	0.36	0.3007	1	0.423	1.308		1	BTA-34568-no-rs	2	1	DOM	15/10	137/134	0.4083		1	BTA-34568-no-rs	2	1	REC	3/22	26/245	0.7224
1	Hapmap42913-BTA-33619	4752971	1	0.42	0.4483	2	0.7671	0.891		1	Hapmap42913-BTA-33619	1	2	DOM	17/8	186/85	1		1	Hapmap42913-BTA-33619	1	2	REC	4/21	57/214	0.796
1	BovineHD0100001370	4781618	2	0.4348	0.4659	1	0.7587	0.8818		1	BovineHD0100001370	2	1	DOM	16/7	185/79	1		1	BovineHD0100001370	2	1	REC	4/19	61/203	0.7949
1	BTB-00002687	4804971	1	0	0.05926	2	0.09886	0		1	BTB-00002687	1	2	DOM	0/25	32/238	0.08928		1	BTB-00002687	1	2	REC	0/25	0/270	1
1	BovineHD0100001385	4856702	2	0	0.05576	1	0.09863	0		1	BovineHD0100001385	2	1	DOM	0/25	28/241	0.1473		1	BovineHD0100001385	2	1	REC	0/25	2/267	1
1	BovineHD0100001392	4882775	2	0	0.03321	1	0.3876	0		1	BovineHD0100001392	2	1	DOM	0/25	18/253	0.3802		1	BovineHD0100001392	2	1	REC	0/25	0/271	1
1	BovineHD0100001394	4890114	2	0.04	0.03731	1	0.7109	1.075		1	BovineHD0100001394	2	1	DOM	2/23	20/248	1		1	BovineHD0100001394	2	1	REC	0/25	0/268	1
1	BTB-01747944	4982601	1	0.08	0.03875	2	0.1517	2.157		1	BTB-01747944	1	2	DOM	4/21	21/250	0.2471		1	BTB-01747944	1	2	REC	0/25	0/271	1
1	BovineHD0100001409	4986559	2	0.52	0.4291	1	0.2348	1.441		1	BovineHD0100001409	2	1	DOM	19/6	179/89	0.5029		1	BovineHD0100001409	2	1	REC	7/18	51/217	0.2958
1	BTB-01991572	4991120	2	0.06	0.03333	1	0.4101	1.851		1	BTB-01991572	2	1	DOM	3/22	18/252	0.4031		1	BTB-01991572	2	1	REC	0/25	0/270	1
1	BovineHD0100001411	4991864	1	0.52	0.4244	2	0.2326	1.47		1	BovineHD0100001411	1	2	DOM	19/6	179/92	0.3791		1	BovineHD0100001411	1	2	REC	7/18	51/220	0.2923
1	BTB-02105769	5012080	1	0.52	0.4557	2	0.4589	1.294		1	BTB-02105769	1	2	DOM	19/6	191/80	0.6509		1	BTB-02105769	1	2	REC	7/18	56/215	0.4428
1	BovineHD0100001418	5037720	2	0.04	0.05037	1	1	0.7855		1	BovineHD0100001418	2	1	DOM	2/23	27/241	1		1	BovineHD0100001418	2	1	REC	0/25	0/268	1
1	ARS-BFGL-NGS-65157	5044963	1	0.4	0.2749	2	0.07165	1.758		1	ARS-BFGL-NGS-65157	1	2	DOM	15/10	127/144	0.2181		1	ARS-BFGL-NGS-65157	1	2	REC	5/20	22/249	0.06318
1	BovineHD0100001424	5058523	2	0.54	0.4244	1	0.1359	1.592		1	BovineHD0100001424	2	1	DOM	19/6	182/89	0.5024		1	BovineHD0100001424	2	1	REC	8/17	48/223	0.1057
1	BovineHD0100001438	5087212	2	0.52	0.3899	1	0.09613	1.695		1	BovineHD0100001438	2	1	DOM	19/6	174/94	0.3777		1	BovineHD0100001438	2	1	REC	7/18	35/233	0.06602
1	BovineHD0100001441	5099108	1	0.42	0.3078	2	0.1132	1.628		1	BovineHD0100001441	1	2	DOM	16/9	138/130	0.296		1	BovineHD0100001441	1	2	REC	5/20	27/241	0.1693
1	BTB-01996267	5147933	1	0.02	0.0941	2	0.1114	0.1965		1	BTB-01996267	1	2	DOM	1/24	49/222	0.0927		1	BTB-01996267	1	2	REC	0/25	2/269	1
1	Hapmap38555-BTA-101264	5338825	2	0.32	0.1937	1	0.04306	1.959		1	Hapmap38555-BTA-101264	2	1	DOM	15/10	93/178	0.01575		1	Hapmap38555-BTA-101264	2	1	REC	1/24	12/259	1
1	BovineHD0100001507	5372683	1	0.42	0.3643	2	0.4466	1.264		1	BovineHD0100001507	1	2	DOM	16/9	160/109	0.8316		1	BovineHD0100001507	1	2	REC	5/20	36/233	0.3655
1	BTB-01160486	5384710	1	0.32	0.19	2	0.04066	2.006		1	BTB-01160486	1	2	DOM	15/10	91/180	0.01479		1	BTB-01160486	1	2	REC	1/24	12/259	1
1	Hapmap60540-rs29021339	5462172	2	0.2	0.3007	1	0.1465	0.5813		1	Hapmap60540-rs29021339	2	1	DOM	10/15	137/134	0.4039		1	Hapmap60540-rs29021339	2	1	REC	0/25	26/245	0.1452
1	BovineHD0100001535	5475277	2	0.02	0.1685	1	0.00338	0.1007		1	BovineHD0100001535	2	1	DOM	1/24	82/185	0.002402		1	BovineHD0100001535	2	1	REC	0/25	8/259	1
1	BovineHD0100001536	5482005	1	0.48	0.4944	2	0.8832	0.9441		1	BovineHD0100001536	1	2	DOM	19/6	203/64	1		1	BovineHD0100001536	1	2	REC	5/20	61/206	1
1	Hapmap60652-rs29022048	5519231	2	0.16	0.3413	1	0.007431	0.3676		1	Hapmap60652-rs29022048	2	1	DOM	8/17	155/116	0.02002		1	Hapmap60652-rs29022048	2	1	REC	0/25	30/241	0.09005
1	BTB-01160178	5562248	1	0	0.1273	2	0.002269	0		1	BTB-01160178	1	2	DOM	0/25	66/205	0.001971		1	BTB-01160178	1	2	REC	0/25	3/268	1
1	BovineHD0100001579	5569070	1	0.02	0.161	2	0.003339	0.1064		1	BovineHD0100001579	1	2	DOM	1/24	79/185	0.004032		1	BovineHD0100001579	1	2	REC	0/25	6/258	1
1	BovineHD0100001591	5612484	2	0.5	0.3116	1	0.01093	2.21		1	BovineHD0100001591	2	1	DOM	19/6	144/124	0.03595		1	BovineHD0100001591	2	1	REC	6/19	23/245	0.02565
1	Hapmap43435-BTA-101251	5615120	2	0.32	0.214	1	0.1083	1.728		1	Hapmap43435-BTA-101251	2	1	DOM	14/11	104/167	0.09203		1	Hapmap43435-BTA-101251	2	1	REC	2/23	12/259	0.3347
1	BovineHD0100001596	5629126	1	0.22	0.4049	2	0.009926	0.4146		1	BovineHD0100001596	1	2	DOM	11/14	170/98	0.08321		1	BovineHD0100001596	1	2	REC	0/25	47/221	0.01925
1	ARS-BFGL-NGS-111125	5644654	2	0.12	0.0738	1	0.2638	1.711		1	ARS-BFGL-NGS-111125	2	1	DOM	6/19	38/233	0.2336		1	ARS-BFGL-NGS-111125	2	1	REC	0/25	2/269	1
1	BovineHD0100001610	5657951	1	0	0.03545	2	0.394	0		1	BovineHD0100001610	1	2	DOM	0/25	19/249	0.3866		1	BovineHD0100001610	1	2	REC	0/25	0/268	1
1	BTB-01160026	5668141	1	0.32	0.3967	2	0.3634	0.7157		1	BTB-01160026	1	2	DOM	16/9	168/103	1		1	BTB-01160026	1	2	REC	0/25	47/224	0.0192
1	BTB-01159977	5692100	1	0.02	0.03333	2	1	0.5918		1	BTB-01159977	1	2	DOM	1/24	18/252	1		1	BTB-01159977	1	2	REC	0/25	0/270	1
1	BTB-01159966	5720949	2	0.02	0.02952	1	1	0.6709		1	BTB-01159966	2	1	DOM	1/24	16/255	1		1	BTB-01159966	2	1	REC	0/25	0/271	1
1	BovineHD0100001629	5730545	2	0.04	0.09888	1	0.2119	0.3797		1	BovineHD0100001629	2	1	DOM	2/23	48/220	0.2737		1	BovineHD0100001629	2	1	REC	0/25	5/263	1
1	BovineHD0100001633	5744744	1	0.28	0.3787	2	0.2201	0.6379		1	BovineHD0100001633	1	2	DOM	14/11	158/110	0.8332		1	BovineHD0100001633	1	2	REC	0/25	45/223	0.01925
1	Hapmap44178-BTA-101248	5745330	2	0	0.04613	1	0.2567	0		1	Hapmap44178-BTA-101248	2	1	DOM	0/25	25/246	0.1466		1	Hapmap44178-BTA-101248	2	1	REC	0/25	0/271	1
1	BovineHD0100001637	5749728	2	0.4	0.4777	1	0.3043	0.7289		1	BovineHD0100001637	2	1	DOM	17/8	201/68	0.4773		1	BovineHD0100001637	2	1	REC	3/22	56/213	0.4338
1	ARS-BFGL-NGS-114983	5768796	2	0.32	0.3708	1	0.5412	0.7984		1	ARS-BFGL-NGS-114983	2	1	DOM	15/10	165/106	1		1	ARS-BFGL-NGS-114983	2	1	REC	1/24	36/235	0.3374
1	BovineHD0100001660	5803981	1	0.38	0.4496	2	0.3746	0.7502		1	BovineHD0100001660	1	2	DOM	16/9	185/83	0.6539		1	BovineHD0100001660	1	2	REC	3/22	56/212	0.4339
1	BovineHD0100001664	5822399	2	0.32	0.2108	1	0.1062	1.762		1	BovineHD0100001664	2	1	DOM	15/10	102/166	0.05261		1	BovineHD0100001664	2	1	REC	1/24	11/257	1
1	BovineHD0100001667	5834595	1	0.38	0.291	2	0.1982	1.493		1	BovineHD0100001667	1	2	DOM	16/9	135/133	0.2148		1	BovineHD0100001667	1	2	REC	3/22	21/247	0.4432
1	BovineHD0100001678	5871590	1	0.2083	0.3647	2	0.0391	0.4585		1	BovineHD0100001678	1	2	DOM	10/14	151/115	0.1983		1	BovineHD0100001678	1	2	REC	0/24	43/223	0.03211
1	BovineHD0100001688	5901795	2	0.22	0.1556	1	0.2308	1.531		1	BovineHD0100001688	2	1	DOM	11/14	78/192	0.1697		1	BovineHD0100001688	2	1	REC	0/25	6/264	1
1	BTB-01728863	5909634	1	0.28	0.3284	2	0.5313	0.7953		1	BTB-01728863	1	2	DOM	14/11	145/126	0.8374		1	BTB-01728863	1	2	REC	0/25	33/238	0.09039
1	BTB-00003983	5945833	1	0.36	0.1815	2	0.004617	2.537		1	BTB-00003983	1	2	DOM	16/9	88/182	0.003515		1	BTB-00003983	1	2	REC	2/23	10/260	0.2699
1	BovineHD0100001699	5948205	1	0.56	0.4777	2	0.3015	1.392		1	BovineHD0100001699	1	2	DOM	22/3	191/78	0.09901		1	BovineHD0100001699	1	2	REC	6/19	66/203	1
1	BovineHD4100000041	5968632	1	0.4167	0.3246	2	0.2032	1.486		1	BovineHD4100000041	1	2	DOM	16/8	147/121	0.2913		1	BovineHD4100000041	1	2	REC	4/20	27/241	0.3013
1	BovineHD0100001705	5979118	1	0.12	0.416	2	1.556e-05	0.1914		1	BovineHD0100001705	1	2	DOM	6/19	178/90	4.859e-05		1	BovineHD0100001705	1	2	REC	0/25	45/223	0.01925
1	ARS-BFGL-NGS-100349	5985024	2	0.32	0.1753	1	0.02121	2.214		1	ARS-BFGL-NGS-100349	2	1	DOM	15/10	84/187	0.006547		1	ARS-BFGL-NGS-100349	2	1	REC	1/24	11/260	1
1	BovineHD0100001716	5991427	2	0.5	0.4554	1	0.5565	1.196		1	BovineHD0100001716	2	1	DOM	20/5	192/77	0.4856		1	BovineHD0100001716	2	1	REC	5/20	53/216	1
1	BTA-122021-no-rs	6038527	2	0.08	0.1863	1	0.07916	0.3797		1	BTA-122021-no-rs	2	1	DOM	4/21	90/181	0.114		1	BTA-122021-no-rs	2	1	REC	0/25	11/260	0.6078
1	BTB-00003770	6062518	2	0.18	0.262	1	0.2376	0.6183		1	BTB-00003770	2	1	DOM	9/16	121/150	0.5284		1	BTB-00003770	2	1	REC	0/25	21/250	0.2346
1	BTB-00003715	6092662	2	0.18	0.2638	1	0.2372	0.6125		1	BTB-00003715	2	1	DOM	9/16	122/149	0.4096		1	BTB-00003715	2	1	REC	0/25	21/250	0.2346
1	BovineHD0100001759	6133181	2	0.4	0.3086	1	0.204	1.494		1	BovineHD0100001759	2	1	DOM	17/8	141/128	0.1479		1	BovineHD0100001759	2	1	REC	3/22	25/244	0.7182
1	BovineHD0100001769	6154670	1	0.12	0.2185	2	0.1446	0.4877		1	BovineHD0100001769	1	2	DOM	6/19	107/163	0.1379		1	BovineHD0100001769	1	2	REC	0/25	11/259	0.6077
1	Hapmap38892-BTA-36614	6160986	2	0.12	0.07011	1	0.2514	1.809		1	Hapmap38892-BTA-36614	2	1	DOM	6/19	38/233	0.2336		1	Hapmap38892-BTA-36614	2	1	REC	0/25	0/271	1
1	BTB-00003652	6184195	2	0.08	0.1125	1	0.6381	0.6857		1	BTB-00003652	2	1	DOM	4/21	59/212	0.6162		1	BTB-00003652	2	1	REC	0/25	2/269	1
1	BTA-120711-no-rs	6205654	1	0.46	0.2934	2	0.02382	2.052		1	BTA-120711-no-rs	1	2	DOM	19/6	141/130	0.02219		1	BTA-120711-no-rs	1	2	REC	4/21	18/253	0.1017
1	BovineHD0100001788	6213780	1	0.42	0.444	2	0.7682	0.9067		1	BovineHD0100001788	1	2	DOM	15/10	192/76	0.2522		1	BovineHD0100001788	1	2	REC	6/19	46/222	0.412
1	BovineHD0100001805	6251669	2	0.06	0.09294	1	0.6073	0.623		1	BovineHD0100001805	2	1	DOM	3/22	47/222	0.78		1	BovineHD0100001805	2	1	REC	0/25	3/266	1
1	BTA-35637-no-rs	6274384	2	0.5	0.4834	1	0.8829	1.069		1	BTA-35637-no-rs	2	1	DOM	19/6	201/70	1		1	BTA-35637-no-rs	2	1	REC	6/19	61/210	0.807
1	ARS-BFGL-NGS-115182	6313376	1	0.44	0.3284	2	0.1195	1.607		1	ARS-BFGL-NGS-115182	1	2	DOM	18/7	145/126	0.09321		1	ARS-BFGL-NGS-115182	1	2	REC	4/21	33/238	0.5325
1	BovineHD0100001854	6366473	1	0.46	0.3266	2	0.06178	1.757		1	BovineHD0100001854	1	2	DOM	18/7	146/125	0.09452		1	BovineHD0100001854	1	2	REC	5/20	31/240	0.2056
1	BTA-35598-no-rs	6375330	2	0.02	0.02583	1	1	0.7697		1	BTA-35598-no-rs	2	1	DOM	1/24	14/257	1		1	BTA-35598-no-rs	2	1	REC	0/25	0/271	1
1	BovineHD0100001857	6384709	2	0.44	0.2926	1	0.0367	1.9		1	BovineHD0100001857	2	1	DOM	17/8	129/141	0.06123		1	BovineHD0100001857	2	1	REC	5/20	29/241	0.1853
1	BovineHD0100001865	6403787	2	0.4375	0.317	1	0.1075	1.676		1	BovineHD0100001865	2	1	DOM	17/7	138/127	0.08958		1	BovineHD0100001865	2	1	REC	4/20	30/235	0.503
1	Hapmap58931-rs29010773	6404933	2	0.12	0.0738	1	0.2638	1.711		1	Hapmap58931-rs29010773	2	1	DOM	6/19	40/231	0.2463		1	Hapmap58931-rs29010773	2	1	REC	0/25	0/271	1
1	BovineHD0100001869	6415835	1	0.42	0.2714	2	0.03257	1.944		1	BovineHD0100001869	1	2	DOM	17/8	122/147	0.03627		1	BovineHD0100001869	1	2	REC	4/21	24/245	0.2765
1	BTA-15152-rs29026517	6440092	2	0.04	0.04797	1	1	0.8269		1	BTA-15152-rs29026517	2	1	DOM	2/23	26/245	1		1	BTA-15152-rs29026517	2	1	REC	0/25	0/271	1
1	BovineHD0100001883	6449771	2	0.1042	0.07736	1	0.5734	1.387		1	BovineHD0100001883	2	1	DOM	5/19	41/224	0.5578		1	BovineHD0100001883	2	1	REC	0/24	0/265	1
1	BovineHD0100001895	6482306	1	0.36	0.2249	2	0.03716	1.939		1	BovineHD0100001895	1	2	DOM	14/11	106/163	0.1362		1	BovineHD0100001895	1	2	REC	4/21	15/254	0.06567
1	BovineHD0100001899	6498668	1	0.44	0.3234	2	0.1161	1.644		1	BovineHD0100001899	1	2	DOM	18/7	145/124	0.09458		1	BovineHD0100001899	1	2	REC	4/21	29/240	0.5022
1	BovineHD0100001914	6539650	2	0.04	0.03903	1	1	1.026		1	BovineHD0100001914	2	1	DOM	2/23	21/248	1		1	BovineHD0100001914	2	1	REC	0/25	0/269	1
1	Hapmap36132-SCAFFOLD45728_8109	6568614	1	0.36	0.363	2	1	0.9872		1	Hapmap36132-SCAFFOLD45728_8109	1	2	DOM	15/10	167/103	0.8336		1	Hapmap36132-SCAFFOLD45728_8109	1	2	REC	3/22	29/241	0.7422
1	ARS-BFGL-NGS-113844	6598700	1	0.16	0.2122	2	0.4683	0.7072		1	ARS-BFGL-NGS-113844	1	2	DOM	8/17	101/170	0.6699		1	ARS-BFGL-NGS-113844	1	2	REC	0/25	14/257	0.617
1	BTB-01489336	6656130	2	0.08	0.1255	1	0.4967	0.6061		1	BTB-01489336	2	1	DOM	4/21	64/207	0.4657		1	BTB-01489336	2	1	REC	0/25	4/267	1
1	BovineHD0100001962	6659142	2	0.14	0.1734	1	0.6949	0.7759		1	BovineHD0100001962	2	1	DOM	7/18	84/187	0.825		1	BovineHD0100001962	2	1	REC	0/25	10/261	1
1	ARS-BFGL-NGS-115389	6683341	1	0.24	0.2749	2	0.7399	0.8329		1	ARS-BFGL-NGS-115389	1	2	DOM	11/14	126/145	0.8374		1	ARS-BFGL-NGS-115389	1	2	REC	1/24	23/248	0.7055
1	BovineHD0100001976	6712326	2	0.12	0.213	1	0.1436	0.504		1	BovineHD0100001976	2	1	DOM	6/19	101/169	0.2007		1	BovineHD0100001976	2	1	REC	0/25	14/256	0.6173
1	BovineHD0100001978	6722062	2	0.04	0.08614	1	0.4159	0.442		1	BovineHD0100001978	2	1	DOM	2/23	45/222	0.3925		1	BovineHD0100001978	2	1	REC	0/25	1/266	1
1	BTB-01489466	6740664	1	0.28	0.3007	2	0.8721	0.9042		1	BTB-01489466	1	2	DOM	14/11	133/138	0.5374		1	BTB-01489466	1	2	REC	0/25	30/241	0.09005
1	BovineHD0100001991	6781489	1	0.42	0.4777	2	0.4622	0.7918		1	BovineHD0100001991	1	2	DOM	19/6	190/79	0.6514		1	BovineHD0100001991	1	2	REC	2/23	67/202	0.08092
1	BovineHD0100001996	6796330	2	0.04	0.09444	1	0.2989	0.3995		1	BovineHD0100001996	2	1	DOM	2/23	48/222	0.2743		1	BovineHD0100001996	2	1	REC	0/25	3/267	1
1	BovineHD0100002000	6812013	2	0.3333	0.3504	1	0.8753	0.927		1	BovineHD0100002000	2	1	DOM	13/11	146/118	1		1	BovineHD0100002000	2	1	REC	3/21	39/225	1
1	Hapmap56173-ss46526166	6813154	1	0.58	0.4815	2	0.1875	1.487		1	Hapmap56173-ss46526166	1	2	DOM	18/7	204/67	0.8093		1	Hapmap56173-ss46526166	1	2	REC	11/14	57/214	0.01336
1	BovineHD0100002001	6813575	2	0.32	0.277	1	0.5135	1.229		1	BovineHD0100002001	2	1	DOM	14/11	126/143	0.409		1	BovineHD0100002001	2	1	REC	2/23	23/246	1
1	Hapmap51901-BTA-42438	6844784	1	0.58	0.4815	2	0.1875	1.487		1	Hapmap51901-BTA-42438	1	2	DOM	18/7	204/67	0.8093		1	Hapmap51901-BTA-42438	1	2	REC	11/14	57/214	0.01336
1	BovineHD0100002023	6893254	1	0.1	0.1654	2	0.3123	0.5605		1	BovineHD0100002023	1	2	DOM	5/20	80/189	0.3636		1	BovineHD0100002023	1	2	REC	0/25	9/260	1
1	BTA-43315-no-rs	6910759	2	0.54	0.4889	1	0.5552	1.227		1	BTA-43315-no-rs	2	1	DOM	18/7	205/66	0.636		1	BTA-43315-no-rs	2	1	REC	9/16	60/211	0.1377
1	BovineHD0100002036	6925674	2	0.08333	0.2094	1	0.03721	0.3432		1	BovineHD0100002036	2	1	DOM	4/20	100/165	0.04561		1	BovineHD0100002036	2	1	REC	0/24	11/254	0.6081
1	ARS-BFGL-NGS-109057	6963461	2	0.36	0.4557	1	0.2346	0.6718		1	ARS-BFGL-NGS-109057	2	1	DOM	14/11	190/81	0.1753		1	ARS-BFGL-NGS-109057	2	1	REC	4/21	57/214	0.796
1	BovineHD0100002068	7002644	1	0.08	0.2148	2	0.026	0.3178		1	BovineHD0100002068	1	2	DOM	4/21	103/167	0.02974		1	BovineHD0100002068	1	2	REC	0/25	13/257	0.6115
1	ARS-BFGL-NGS-41525	7022169	2	0.52	0.4926	1	0.7684	1.116		1	ARS-BFGL-NGS-41525	2	1	DOM	17/8	206/65	0.4661		1	ARS-BFGL-NGS-41525	2	1	REC	9/16	61/210	0.1422
1	BovineHD0100002084	7036520	2	0.3	0.3741	1	0.3585	0.7171		1	BovineHD0100002084	2	1	DOM	14/11	160/110	0.8326		1	BovineHD0100002084	2	1	REC	1/24	42/228	0.1454
1	BovineHD0100002101	7059775	2	0.0625	0.05682	1	0.7491	1.107		1	BovineHD0100002101	2	1	DOM	3/21	30/234	0.7453		1	BovineHD0100002101	2	1	REC	0/24	0/264	1
1	Hapmap34831-BES10_Contig712_1090	7071121	2	0.06	0.1384	1	0.1306	0.3974		1	Hapmap34831-BES10_Contig712_1090	2	1	DOM	3/22	73/198	0.1491		1	Hapmap34831-BES10_Contig712_1090	2	1	REC	0/25	2/269	1
1	BovineHD0100002124	7144946	1	0.36	0.2313	2	0.05626	1.869		1	BovineHD0100002124	1	2	DOM	15/10	107/161	0.05834		1	BovineHD0100002124	1	2	REC	3/22	17/251	0.3946
1	BovineHD0100002127	7159731	2	0.4783	0.454	1	0.7599	1.102		1	BovineHD0100002127	2	1	DOM	16/7	189/72	0.8093		1	BovineHD0100002127	2	1	REC	6/17	48/213	0.4047
1	BTA-44295-no-rs	7164618	1	0.34	0.2185	2	0.05469	1.842		1	BTA-44295-no-rs	1	2	DOM	14/11	104/166	0.09311		1	BTA-44295-no-rs	1	2	REC	3/22	14/256	0.1651
1	BTA-44308-no-rs	7202401	2	0.1042	0.2193	1	0.06493	0.4139		1	BTA-44308-no-rs	2	1	DOM	5/19	108/161	0.07959		1	BTA-44308-no-rs	2	1	REC	0/24	10/259	1
1	BTA-45181-no-rs	7260253	2	0.44	0.4483	1	1	0.9668		1	BTA-45181-no-rs	2	1	DOM	18/7	187/84	0.825		1	BTA-45181-no-rs	2	1	REC	4/21	56/215	0.7954
1	ARS-BFGL-NGS-11803	7280774	2	0.14	0.2066	1	0.3557	0.625		1	ARS-BFGL-NGS-11803	2	1	DOM	7/18	95/176	0.5196		1	ARS-BFGL-NGS-11803	2	1	REC	0/25	17/254	0.3773
1	BTA-45221-no-rs	7311182	2	0.36	0.4779	1	0.1381	0.6146		1	BTA-45221-no-rs	2	1	DOM	14/11	200/71	0.0646		1	BTA-45221-no-rs	2	1	REC	4/21	59/212	0.6162
1	BovineHD0100002179	7333147	2	0.2292	0.2659	1	0.7322	0.8207		1	BovineHD0100002179	2	1	DOM	10/14	119/148	0.8331		1	BovineHD0100002179	2	1	REC	1/23	23/244	0.705
1	BovineHD0100002183	7354808	2	0.2292	0.2243	1	1	1.028		1	BovineHD0100002183	2	1	DOM	10/14	108/155	1		1	BovineHD0100002183	2	1	REC	1/23	10/253	1
1	BovineHD0100002202	7412933	2	0.5833	0.4487	1	0.09533	1.72		1	BovineHD0100002202	2	1	DOM	21/3	179/84	0.06173		1	BovineHD0100002202	2	1	REC	7/17	57/206	0.4422
1	BovineHD4100000049	7419499	2	0.36	0.2509	1	0.09495	1.679		1	BovineHD4100000049	2	1	DOM	15/10	117/152	0.1415		1	BovineHD4100000049	2	1	REC	3/22	18/251	0.4038
1	Hapmap39203-BTA-46163	7424552	2	0.1	0.04428	1	0.08794	2.398		1	Hapmap39203-BTA-46163	2	1	DOM	5/20	24/247	0.08243		1	Hapmap39203-BTA-46163	2	1	REC	0/25	0/271	1
1	AX-18028228	7429447	2	0.26	0.3222	1	0.4287	0.739		1	AX-18028228	2	1	DOM	12/13	146/124	0.676		1	AX-18028228	2	1	REC	1/24	28/242	0.4879
1	ARS-BFGL-NGS-96381	7449333	2	0.4167	0.4944	1	0.3661	0.7305		1	ARS-BFGL-NGS-96381	2	1	DOM	14/10	199/68	0.09553		1	ARS-BFGL-NGS-96381	2	1	REC	6/18	65/202	1
1	BTA-46228-no-rs	7484829	1	0.24	0.2122	2	0.7186	1.173		1	BTA-46228-no-rs	1	2	DOM	11/14	99/172	0.5184		1	BTA-46228-no-rs	1	2	REC	1/24	16/255	1
1	BovineHD0100002252	7519177	1	0.3958	0.4849	2	0.291	0.696		1	BovineHD0100002252	1	2	DOM	16/8	189/76	0.6424		1	BovineHD0100002252	1	2	REC	3/21	68/197	0.2154
1	BovineHD0100002277	7568080	1	0.4583	0.4065	2	0.5406	1.235		1	BovineHD0100002277	1	2	DOM	18/6	173/89	0.4982		1	BovineHD0100002277	1	2	REC	4/20	40/222	0.7726
1	BTA-47159-no-rs	7569903	1	0.08	0.1402	2	0.2849	0.5332		1	BTA-47159-no-rs	1	2	DOM	4/21	74/197	0.3415		1	BTA-47159-no-rs	1	2	REC	0/25	2/269	1
1	BovineHD0100002282	7575218	2	0.3958	0.4305	1	0.761	0.8669		1	BovineHD0100002282	2	1	DOM	17/7	177/89	0.8218		1	BovineHD0100002282	2	1	REC	2/22	52/214	0.2721
1	BTA-16441-no-rs	7616380	2	0.34	0.2862	1	0.4194	1.285		1	BTA-16441-no-rs	2	1	DOM	15/10	132/137	0.4034		1	BTA-16441-no-rs	2	1	REC	2/23	22/247	1
1	BovineHD0100002347	7788418	1	0.4583	0.3859	2	0.3556	1.346		1	BovineHD0100002347	1	2	DOM	18/6	171/92	0.376		1	BovineHD0100002347	1	2	REC	4/20	32/231	0.5194
1	ARS-BFGL-NGS-38621	7808598	2	0.42	0.3063	1	0.112	1.64		1	ARS-BFGL-NGS-38621	2	1	DOM	18/7	146/125	0.09452		1	ARS-BFGL-NGS-38621	2	1	REC	3/22	20/251	0.426
1	BovineHD0100002376	7890249	1	0.44	0.4833	2	0.6575	0.8401		1	BovineHD0100002376	1	2	DOM	18/7	197/72	1		1	BovineHD0100002376	1	2	REC	4/21	63/206	0.4667
1	Hapmap44081-BTA-48210	7893442	2	0.08	0.03506	1	0.1202	2.394		1	Hapmap44081-BTA-48210	2	1	DOM	4/21	19/252	0.116		1	Hapmap44081-BTA-48210	2	1	REC	0/25	0/271	1
1	BovineHD0100002384	7920464	2	0.44	0.4908	1	0.5552	0.8153		1	BovineHD0100002384	2	1	DOM	18/7	196/75	1		1	BovineHD0100002384	2	1	REC	4/21	70/201	0.3416
1	ARS-BFGL-NGS-114174	7939960	2	0.44	0.4907	1	0.5551	0.8155		1	ARS-BFGL-NGS-114174	2	1	DOM	18/7	195/74	1		1	ARS-BFGL-NGS-114174	2	1	REC	4/21	69/200	0.3424
1	BovineHD0100002396	7964687	2	0.16	0.1338	1	0.6651	1.233		1	BovineHD0100002396	2	1	DOM	8/17	69/200	0.4821		1	BovineHD0100002396	2	1	REC	0/25	3/266	1
1	BTA-48234-no-rs	7966238	2	0.12	0.1089	1	0.8127	1.116		1	BTA-48234-no-rs	2	1	DOM	6/19	57/214	0.7983		1	BTA-48234-no-rs	2	1	REC	0/25	2/269	1
1	BTA-29644-no-rs	8000850	1	0.44	0.476	2	0.6593	0.8649		1	BTA-29644-no-rs	1	2	DOM	17/8	192/79	0.8193		1	BTA-29644-no-rs	1	2	REC	5/20	66/205	0.8077
1	Hapmap48967-BTA-97940	8075890	1	0.44	0.3801	2	0.4485	1.282		1	Hapmap48967-BTA-97940	1	2	DOM	16/9	167/104	1		1	Hapmap48967-BTA-97940	1	2	REC	6/19	39/232	0.2394
1	BovineHD0100002423	8100141	1	0.5833	0.464	2	0.1315	1.617		1	BovineHD0100002423	1	2	DOM	21/3	184/80	0.0968		1	BovineHD0100002423	1	2	REC	7/17	61/203	0.4633
1	BTB-01493780	8122464	1	0.06	0.1402	2	0.13	0.3914		1	BTB-01493780	1	2	DOM	3/22	72/199	0.1488		1	BTB-01493780	1	2	REC	0/25	4/267	1
1	BovineHD0100002437	8161528	2	0.2174	0.2156	1	1	1.01		1	BovineHD0100002437	2	1	DOM	9/14	98/164	1		1	BovineHD0100002437	2	1	REC	1/22	15/247	1
1	BovineHD0100002440	8182783	2	0.3958	0.2992	1	0.191	1.534		1	BovineHD0100002440	2	1	DOM	16/8	125/139	0.08806		1	BovineHD0100002440	2	1	REC	3/21	33/231	1
1	Hapmap48369-BTA-50306	8219111	1	0.32	0.3321	2	1	0.9464		1	Hapmap48369-BTA-50306	1	2	DOM	14/11	151/120	1		1	Hapmap48369-BTA-50306	1	2	REC	2/23	29/242	1
1	BovineHD0100002449	8226256	2	0.3696	0.383	1	1	0.9443		1	BovineHD0100002449	2	1	DOM	14/9	167/98	0.8257		1	BovineHD0100002449	2	1	REC	3/20	36/229	1
1	BovineHD0100002458	8274037	2	0.5208	0.481	1	0.6521	1.173		1	BovineHD0100002458	2	1	DOM	20/4	198/65	0.4624		1	BovineHD0100002458	2	1	REC	5/19	55/208	1
1	Hapmap41255-BTA-40460	8298027	2	0.44	0.3838	1	0.4511	1.262		1	Hapmap41255-BTA-40460	2	1	DOM	19/6	168/103	0.1973		1	Hapmap41255-BTA-40460	2	1	REC	3/22	40/231	1
1	BTA-114657-no-rs	8320562	1	0.14	0.07593	2	0.1687	1.981		1	BTA-114657-no-rs	1	2	DOM	7/18	41/229	0.1503		1	BTA-114657-no-rs	1	2	REC	0/25	0/270	1
1	BovineHD0100002480	8329113	1	0.4375	0.3864	2	0.5374	1.235		1	BovineHD0100002480	1	2	DOM	18/6	165/99	0.2722		1	BovineHD0100002480	1	2	REC	3/21	39/225	1
1	ARS-BFGL-NGS-116504	8347260	2	0.46	0.428	1	0.658	1.138		1	ARS-BFGL-NGS-116504	2	1	DOM	17/8	185/86	1		1	ARS-BFGL-NGS-116504	2	1	REC	6/19	47/224	0.4152
1	BTA-114662-no-rs	8374638	2	0.12	0.1978	1	0.2575	0.5532		1	BTA-114662-no-rs	2	1	DOM	6/19	98/170	0.2757		1	BTA-114662-no-rs	2	1	REC	0/25	8/260	1
1	ARS-BFGL-NGS-105113	8534534	2	0.32	0.5093	1	0.01173	0.4535		1	ARS-BFGL-NGS-105113	2	1	DOM	14/11	210/60	0.02505		1	ARS-BFGL-NGS-105113	2	1	REC	2/23	65/205	0.08062
1	BovineHD0100002528	8548471	1	0.3542	0.2547	2	0.1695	1.605		1	BovineHD0100002528	1	2	DOM	15/9	116/151	0.08749		1	BovineHD0100002528	1	2	REC	2/22	20/247	0.7003
1	BovineHD0100002539	8607680	1	0.2708	0.3845	2	0.1604	0.5947		1	BovineHD0100002539	1	2	DOM	12/12	168/96	0.1939		1	BovineHD0100002539	1	2	REC	1/23	35/229	0.3317
1	ARS-BFGL-NGS-44292	8645661	2	0.36	0.369	1	1	0.9619		1	ARS-BFGL-NGS-44292	2	1	DOM	16/9	160/111	0.6762		1	ARS-BFGL-NGS-44292	2	1	REC	2/23	40/231	0.5497
1	BovineHD0100002563	8685545	2	0.2826	0.3938	1	0.1562	0.6064		1	BovineHD0100002563	2	1	DOM	12/11	166/93	0.2671		1	BovineHD0100002563	2	1	REC	1/22	38/221	0.2203
1	BovineHD0100002572	8717011	1	0.46	0.417	2	0.5536	1.191		1	BovineHD0100002572	1	2	DOM	17/8	180/91	1		1	BovineHD0100002572	1	2	REC	6/19	46/225	0.409
1	Hapmap42827-BTA-116887	8738949	2	0.42	0.4704	1	0.5546	0.8154		1	Hapmap42827-BTA-116887	2	1	DOM	17/8	200/70	0.486		1	Hapmap42827-BTA-116887	2	1	REC	4/21	54/216	0.7952
1	BovineHD0100002584	8752633	2	0.22	0.2989	1	0.2605	0.6616		1	BovineHD0100002584	2	1	DOM	10/15	141/130	0.2983		1	BovineHD0100002584	2	1	REC	1/24	21/250	0.7062
1	BTA-116886-no-rs	8760078	2	0.04	0.05351	1	1	0.7371		1	BTA-116886-no-rs	2	1	DOM	2/23	29/242	1		1	BTA-116886-no-rs	2	1	REC	0/25	0/271	1
1	BovineHD0100002591	8781288	1	0.25	0.3506	2	0.2032	0.6175		1	BovineHD0100002591	1	2	DOM	11/13	153/108	0.2814		1	BovineHD0100002591	1	2	REC	1/23	30/231	0.4905
1	ARS-BFGL-NGS-109383	8808124	1	0.04	0.02963	2	0.6589	1.365		1	ARS-BFGL-NGS-109383	1	2	DOM	2/23	16/254	0.6564		1	ARS-BFGL-NGS-109383	1	2	REC	0/25	0/270	1
1	BovineHD0100002599	8813992	1	0.2083	0.4125	2	0.005326	0.3747		1	BovineHD0100002599	1	2	DOM	10/14	175/88	0.02397		1	BovineHD0100002599	1	2	REC	0/24	42/221	0.03194
1	Hapmap54753-rs29013987	8831407	1	0.66	0.4188	2	0.001534	2.694		1	Hapmap54753-rs29013987	1	2	DOM	24/1	186/85	0.002252		1	Hapmap54753-rs29013987	1	2	REC	9/16	41/230	0.02085
1	BovineHD0100002609	8850299	2	0.2083	0.4349	1	0.002084	0.3419		1	BovineHD0100002609	2	1	DOM	9/15	185/84	0.003018		1	BovineHD0100002609	2	1	REC	1/23	49/220	0.09249
1	BovineHD0100002622	8908159	2	0.2826	0.2197	1	0.3569	1.399		1	BovineHD0100002622	2	1	DOM	12/11	104/160	0.2704		1	BovineHD0100002622	2	1	REC	1/22	12/252	1
1	ARS-BFGL-NGS-119108	8937196	1	0.2	0.1439	2	0.2985	1.487		1	ARS-BFGL-NGS-119108	1	2	DOM	9/16	73/198	0.3535		1	ARS-BFGL-NGS-119108	1	2	REC	1/24	5/266	0.4139
1	BovineHD0100002644	8993587	1	0.26	0.2741	2	1	0.9306		1	BovineHD0100002644	1	2	DOM	12/13	132/138	1		1	BovineHD0100002644	1	2	REC	1/24	16/254	1
1	ARS-BFGL-BAC-27364	9069741	2	0.1	0.1833	1	0.1746	0.4949		1	ARS-BFGL-BAC-27364	2	1	DOM	5/20	92/178	0.1852		1	ARS-BFGL-BAC-27364	2	1	REC	0/25	7/263	1
1	BTA-120428-no-rs	9151571	1	0.32	0.4225	2	0.1785	0.6432		1	BTA-120428-no-rs	1	2	DOM	15/10	178/93	0.6615		1	BTA-120428-no-rs	1	2	REC	1/24	51/220	0.09431
1	BovineHD0100002683	9178105	1	0.1739	0.3078	2	0.06433	0.4734		1	BovineHD0100002683	1	2	DOM	8/15	139/129	0.132		1	BovineHD0100002683	1	2	REC	0/23	26/242	0.2424
1	Hapmap49483-BTA-120432	9259731	2	0.1	0.1716	1	0.2354	0.5364		1	Hapmap49483-BTA-120432	2	1	DOM	5/20	87/184	0.2627		1	Hapmap49483-BTA-120432	2	1	REC	0/25	6/265	1
1	BovineHD0100002710	9260615	1	0.14	0.3315	2	0.004107	0.3283		1	BovineHD0100002710	1	2	DOM	7/18	150/120	0.01101		1	BovineHD0100002710	1	2	REC	0/25	29/241	0.1503
1	BovineHD0100002717	9285546	2	0.3125	0.2091	1	0.1021	1.719		1	BovineHD0100002717	2	1	DOM	12/12	102/161	0.2859		1	BovineHD0100002717	2	1	REC	3/21	8/255	0.05438
1	BovineHD0100002727	9313530	2	0.02174	0.05534	1	0.4994	0.3793		1	BovineHD0100002727	2	1	DOM	1/22	29/233	0.4866		1	BovineHD0100002727	2	1	REC	0/23	0/262	1
1	BovineHD0100002735	9339352	2	0.1304	0.2094	1	0.2529	0.5662		1	BovineHD0100002735	2	1	DOM	6/17	101/164	0.3683		1	BovineHD0100002735	2	1	REC	0/23	10/255	1
1	BovineHD0100002758	9438066	2	0.2174	0.2936	1	0.3119	0.6685		1	BovineHD0100002758	2	1	DOM	10/13	137/127	0.5167		1	BovineHD0100002758	2	1	REC	0/23	18/246	0.3773
1	Hapmap59566-rs29024165	9467212	2	0.08	0.1236	1	0.4958	0.6165		1	Hapmap59566-rs29024165	2	1	DOM	4/21	65/206	0.4642		1	Hapmap59566-rs29024165	2	1	REC	0/25	2/269	1
1	BTA-120430-no-rs	9523532	1	0.32	0.5074	2	0.01196	0.4568		1	BTA-120430-no-rs	1	2	DOM	16/9	206/64	0.2235		1	BTA-120430-no-rs	1	2	REC	0/25	68/202	0.001947
1	Hapmap58026-ss46526282	9592005	2	0.38	0.3985	1	0.8804	0.925		1	Hapmap58026-ss46526282	2	1	DOM	16/9	178/93	0.8301		1	Hapmap58026-ss46526282	2	1	REC	3/22	38/233	1
1	ARS-BFGL-NGS-118398	9646618	2	0.34	0.4207	1	0.2961	0.7095		1	ARS-BFGL-NGS-118398	2	1	DOM	14/11	183/88	0.2707		1	ARS-BFGL-NGS-118398	2	1	REC	3/22	45/226	0.7776
1	BovineHD0100002828	9666125	2	0.3043	0.4291	1	0.1192	0.582		1	BovineHD0100002828	2	1	DOM	13/10	174/87	0.3619		1	BovineHD0100002828	2	1	REC	1/22	50/211	0.09082
1	BovineHD0100002836	9708099	2	0.3261	0.4275	1	0.2134	0.648		1	BovineHD0100002836	2	1	DOM	13/10	174/88	0.3643		1	BovineHD0100002836	2	1	REC	2/21	50/212	0.272
1	ARS-BFGL-NGS-14644	9741307	1	0.08	0.1402	2	0.2849	0.5332		1	ARS-BFGL-NGS-14644	1	2	DOM	4/21	72/199	0.3399		1	ARS-BFGL-NGS-14644	1	2	REC	0/25	4/267	1
1	BovineHD0100002867	9830721	1	0.5	0.4253	2	0.3537	1.351		1	BovineHD0100002867	1	2	DOM	20/3	176/85	0.06043		1	BovineHD0100002867	1	2	REC	3/20	46/215	0.776
1	BovineHD0100002870	9843069	1	0.4348	0.2934	2	0.0646	1.852		1	BovineHD0100002870	1	2	DOM	17/6	131/128	0.04797		1	BovineHD0100002870	1	2	REC	3/20	21/238	0.4277
1	BovineHD0100002895	9929401	2	0.3125	0.4106	1	0.2194	0.6524		1	BovineHD0100002895	2	1	DOM	12/12	176/87	0.1166		1	BovineHD0100002895	2	1	REC	3/21	40/223	1
1	BovineHD0100002920	10015824	2	0.26	0.3722	1	0.126	0.5926		1	BovineHD0100002920	2	1	DOM	12/13	168/102	0.1991		1	BovineHD0100002920	2	1	REC	1/24	33/237	0.3312
1	BTA-38496-no-rs	10029104	1	0.62	0.4354	2	0.01677	2.116		1	BTA-38496-no-rs	1	2	DOM	22/3	188/83	0.06392		1	BTA-38496-no-rs	1	2	REC	9/16	48/223	0.03481
1	BovineHD0100002947	10061095	2	0.3125	0.3697	1	0.5313	0.7748		1	BovineHD0100002947	2	1	DOM	12/12	158/103	0.3854		1	BovineHD0100002947	2	1	REC	3/21	35/226	1
1	BovineHD0100002950	10083802	2	0.3125	0.3645	1	0.532	0.7925		1	BovineHD0100002950	2	1	DOM	12/12	155/107	0.3953		1	BovineHD0100002950	2	1	REC	3/21	36/226	1
1	ARS-BFGL-NGS-113570	10225421	1	0.14	0.1218	2	0.6558	1.174		1	ARS-BFGL-NGS-113570	1	2	DOM	7/18	64/207	0.6276		1	ARS-BFGL-NGS-113570	1	2	REC	0/25	2/269	1
1	Hapmap54975-rs29019203	10261207	2	0.36	0.5055	1	0.05495	0.5502		1	Hapmap54975-rs29019203	2	1	DOM	16/9	206/65	0.2259		1	Hapmap54975-rs29019203	2	1	REC	2/23	68/203	0.08149
1	BovineHD0100003065	10325849	2	0.1667	0.233	1	0.3695	0.6585		1	BovineHD0100003065	2	1	DOM	8/16	111/153	0.5175		1	BovineHD0100003065	2	1	REC	0/24	12/252	0.6078
1	BovineHD0100003089	10376109	2	0.1667	0.2888	1	0.09112	0.4926		1	BovineHD0100003089	2	1	DOM	8/16	127/131	0.1992		1	BovineHD0100003089	2	1	REC	0/24	22/236	0.234
1	Hapmap49138-BTA-37549	10391180	2	0.12	0.1513	1	0.68	0.765		1	Hapmap49138-BTA-37549	2	1	DOM	6/19	71/200	1		1	Hapmap49138-BTA-37549	2	1	REC	0/25	11/260	0.6078
1	Hapmap38504-BTA-51402	10421991	1	0.18	0.1593	2	0.6886	1.159		1	Hapmap38504-BTA-51402	1	2	DOM	9/16	80/190	0.5014		1	Hapmap38504-BTA-51402	1	2	REC	0/25	6/264	1
1	BovineHD0100003129	10442426	2	0	0.05263	1	0.1559	0		1	BovineHD0100003129	2	1	DOM	0/24	28/238	0.1454		1	BovineHD0100003129	2	1	REC	0/24	0/266	1
1	UA-IFASA-5979	10475147	2	0.3	0.3875	1	0.2864	0.6776		1	UA-IFASA-5979	2	1	DOM	14/11	168/103	0.6682		1	UA-IFASA-5979	2	1	REC	1/24	42/229	0.1457
1	BovineHD0100003147	10482008	2	0.02083	0.07171	1	0.2377	0.2754		1	BovineHD0100003147	2	1	DOM	1/23	35/223	0.3333		1	BovineHD0100003147	2	1	REC	0/24	2/256	1
1	BovineHD0100003154	10501157	2	0.4792	0.4129	1	0.4451	1.308		1	BovineHD0100003154	2	1	DOM	20/4	182/82	0.1671		1	BovineHD0100003154	2	1	REC	3/21	36/228	1
1	AX-18039968	10512329	2	0.3	0.3222	1	0.8743	0.9015		1	AX-18039968	2	1	DOM	13/12	152/118	0.6803		1	AX-18039968	2	1	REC	2/23	22/248	1
1	BovineHD0100003161	10518325	1	0.36	0.4074	2	0.5499	0.8182		1	BovineHD0100003161	1	2	DOM	15/10	184/86	0.5035		1	BovineHD0100003161	1	2	REC	3/22	36/234	1
1	ARS-BFGL-NGS-548	10523098	2	0.42	0.3056	1	0.1115	1.646		1	ARS-BFGL-NGS-548	2	1	DOM	19/6	146/124	0.03692		1	ARS-BFGL-NGS-548	2	1	REC	2/23	19/251	0.6949
1	ARS-BFGL-NGS-43310	10563465	1	0.4	0.4742	2	0.3747	0.7393		1	ARS-BFGL-NGS-43310	1	2	DOM	17/8	202/69	0.4796		1	ARS-BFGL-NGS-43310	1	2	REC	3/22	55/216	0.4335
1	ARS-BFGL-NGS-1296	10565732	1	0.14	0.2103	2	0.2758	0.6112		1	ARS-BFGL-NGS-1296	1	2	DOM	7/18	103/168	0.3908		1	ARS-BFGL-NGS-1296	1	2	REC	0/25	11/260	0.6078
1	Hapmap38887-BTA-22281	10605227	2	0.14	0.2185	1	0.2763	0.5822		1	Hapmap38887-BTA-22281	2	1	DOM	7/18	108/162	0.2878		1	Hapmap38887-BTA-22281	2	1	REC	0/25	10/260	1
1	BovineHD0100003225	10647953	1	0.08333	0.1525	2	0.2842	0.5052		1	BovineHD0100003225	1	2	DOM	4/20	74/185	0.2432		1	BovineHD0100003225	1	2	REC	0/24	5/254	1
1	Hapmap57724-rs29022825	10679165	1	0.48	0.4391	2	0.6558	1.179		1	Hapmap57724-rs29022825	1	2	DOM	20/5	188/83	0.3615		1	Hapmap57724-rs29022825	1	2	REC	4/21	50/221	1
1	Hapmap44892-BTA-50337	10724714	1	0.32	0.3451	2	0.7582	0.8928		1	Hapmap44892-BTA-50337	1	2	DOM	15/10	154/114	0.8362		1	Hapmap44892-BTA-50337	1	2	REC	1/24	31/237	0.4972
1	BTA-50328-no-rs	10747495	1	0.36	0.4796	2	0.138	0.6103		1	BTA-50328-no-rs	1	2	DOM	17/8	202/68	0.4763		1	BTA-50328-no-rs	1	2	REC	1/24	57/213	0.03678
1	ARS-BFGL-NGS-108684	10771543	1	0.36	0.3271	2	0.6395	1.157		1	ARS-BFGL-NGS-108684	1	2	DOM	16/9	153/116	0.533		1	ARS-BFGL-NGS-108684	1	2	REC	2/23	23/246	1
1	Hapmap51183-BTA-19351	10793076	2	0.42	0.4096	1	0.8818	1.044		1	Hapmap51183-BTA-19351	2	1	DOM	19/6	179/92	0.3791		1	Hapmap51183-BTA-19351	2	1	REC	2/23	43/228	0.3927
1	BovineHD0100003282	10809430	2	0.1522	0.2729	1	0.08188	0.4782		1	BovineHD0100003282	2	1	DOM	7/16	127/135	0.1271		1	BovineHD0100003282	2	1	REC	0/23	16/246	0.627
1	BovineHD0100003285	10826689	1	0.4348	0.3555	2	0.3371	1.394		1	BovineHD0100003285	1	2	DOM	18/5	159/104	0.1175		1	BovineHD0100003285	1	2	REC	2/21	28/235	1
1	BovineHD0100003303	10887298	2	0.3478	0.4457	1	0.2182	0.6633		1	BovineHD0100003303	2	1	DOM	13/10	192/75	0.1509		1	BovineHD0100003303	2	1	REC	3/20	46/221	0.7764
1	BovineHD0100003313	10954721	1	0.2174	0.3523	2	0.07454	0.5108		1	BovineHD0100003313	1	2	DOM	10/13	155/109	0.1886		1	BovineHD0100003313	1	2	REC	0/23	31/233	0.1507
1	Hapmap51416-BTA-19350	10960816	2	0	0.01107	1	1	0		1	Hapmap51416-BTA-19350	2	1	DOM	0/25	6/265	1		1	Hapmap51416-BTA-19350	2	1	REC	0/25	0/271	1
1	ARS-BFGL-NGS-113751	11092797	1	0.18	0.1989	2	0.854	0.8842		1	ARS-BFGL-NGS-113751	1	2	DOM	9/16	100/169	1		1	ARS-BFGL-NGS-113751	1	2	REC	0/25	7/262	1
1	BovineHD0100003385	11208321	2	0.04167	0.1078	1	0.2119	0.3598		1	BovineHD0100003385	2	1	DOM	2/22	52/217	0.2719		1	BovineHD0100003385	2	1	REC	0/24	6/263	1
1	BovineHD0100003390	11227266	1	0.02083	0.0539	2	0.4998	0.3734		1	BovineHD0100003390	1	2	DOM	1/23	29/240	0.4876		1	BovineHD0100003390	1	2	REC	0/24	0/269	1
1	BTA-122626-no-rs	11267601	1	0.02	0.01845	2	1	1.086		1	BTA-122626-no-rs	1	2	DOM	1/24	10/261	1		1	BTA-122626-no-rs	1	2	REC	0/25	0/271	1
1	BovineHD0100003407	11296054	2	0.1042	0.2171	1	0.09164	0.4194		1	BovineHD0100003407	2	1	DOM	5/19	101/157	0.08252		1	BovineHD0100003407	2	1	REC	0/24	11/247	0.6072
1	BovineHD0100003409	11304599	2	0.1667	0.1858	1	0.8475	0.8763		1	BovineHD0100003409	2	1	DOM	8/16	91/170	1		1	BovineHD0100003409	2	1	REC	0/24	6/255	1
1	BovineHD0200037433	11315803	2	0.1875	0.1402	1	0.3895	1.416		1	BovineHD0200037433	2	1	DOM	8/16	68/196	0.4688		1	BovineHD0200037433	2	1	REC	1/23	6/258	0.4598
1	Hapmap60823-rs29019235	11341018	2	0.02	0.01845	1	1	1.086		1	Hapmap60823-rs29019235	2	1	DOM	1/24	10/261	1		1	Hapmap60823-rs29019235	2	1	REC	0/25	0/271	1
1	ARS-BFGL-NGS-36767	11400789	2	0.48	0.3893	1	0.2284	1.448		1	ARS-BFGL-NGS-36767	2	1	DOM	16/9	176/95	1		1	ARS-BFGL-NGS-36767	2	1	REC	8/17	35/236	0.01653
1	BovineHD0100003437	11462748	1	0.52	0.4797	2	0.6579	1.175		1	BovineHD0100003437	1	2	DOM	18/7	205/66	0.636		1	BovineHD0100003437	1	2	REC	8/17	55/216	0.2004
1	Hapmap40304-BTA-17131	11472285	1	0.32	0.2768	2	0.5133	1.23		1	Hapmap40304-BTA-17131	1	2	DOM	13/12	135/136	1		1	Hapmap40304-BTA-17131	1	2	REC	3/22	15/256	0.1859
1	BovineHD0100003453	11509566	2	0.34	0.47	1	0.1018	0.5808		1	BovineHD0100003453	2	1	DOM	14/11	197/70	0.0648		1	BovineHD0100003453	2	1	REC	3/22	54/213	0.4332
1	BovineHD0100003459	11541372	1	0.46	0.4736	2	0.8832	0.9469		1	BovineHD0100003459	1	2	DOM	18/7	192/73	1		1	BovineHD0100003459	1	2	REC	5/20	59/206	1
1	Hapmap38737-BTA-22640	11647870	2	0	0.03889	1	0.2435	0		1	Hapmap38737-BTA-22640	2	1	DOM	0/25	21/249	0.2344		1	Hapmap38737-BTA-22640	2	1	REC	0/25	0/270	1
1	BovineHD0100003487	11671029	1	0.34	0.2143	2	0.05094	1.889		1	BovineHD0100003487	1	2	DOM	16/9	105/161	0.02023		1	BovineHD0100003487	1	2	REC	1/24	9/257	0.5987
1	BovineHD0100003501	11735568	2	0.12	0.1528	1	0.6797	0.7559		1	BovineHD0100003501	2	1	DOM	6/19	76/189	0.8167		1	BovineHD0100003501	2	1	REC	0/25	5/260	1
1	Hapmap54322-rs29009637	11776956	2	0.2	0.1993	1	1	1.005		1	Hapmap54322-rs29009637	2	1	DOM	10/15	95/176	0.6646		1	Hapmap54322-rs29009637	2	1	REC	0/25	13/258	0.6114
1	BovineHD0100003524	11818525	2	0.36	0.4814	1	0.1056	0.6059		1	BovineHD0100003524	2	1	DOM	16/9	198/71	0.3476		1	BovineHD0100003524	2	1	REC	2/23	61/208	0.124
1	Hapmap43814-BTA-22629	11840829	2	0.16	0.2066	1	0.5809	0.7313		1	Hapmap43814-BTA-22629	2	1	DOM	7/18	101/170	0.3947		1	Hapmap43814-BTA-22629	2	1	REC	1/24	11/260	1
1	BovineHD0100003573	11956821	1	0.2917	0.4023	2	0.1648	0.6119		1	BovineHD0100003573	1	2	DOM	12/12	178/88	0.1167		1	BovineHD0100003573	1	2	REC	2/22	36/230	0.7516
1	Hapmap55642-rs29027263	11993667	2	0.5	0.3856	1	0.1309	1.593		1	Hapmap55642-rs29027263	2	1	DOM	17/8	176/95	0.8296		1	Hapmap55642-rs29027263	2	1	REC	8/17	33/238	0.01224
1	BovineHD0100003588	12049311	1	0.48	0.5	2	0.8826	0.9231		1	BovineHD0100003588	1	2	DOM	17/8	205/63	0.3366		1	BovineHD0100003588	1	2	REC	7/18	63/205	0.6264
1	BovineHD0100003597	12069543	1	0.36	0.3849	2	0.7633	0.8989		1	BovineHD0100003597	1	2	DOM	13/12	166/99	0.3894		1	BovineHD0100003597	1	2	REC	5/20	38/227	0.3915
1	BovineHD0100003627	12200034	2	0.4	0.4815	1	0.3019	0.7178		1	BovineHD0100003627	2	1	DOM	14/11	200/71	0.0646		1	BovineHD0100003627	2	1	REC	6/19	61/210	0.807
1	BovineHD0100003636	12239641	1	0.04167	0.07722	2	0.5648	0.5196		1	BovineHD0100003636	1	2	DOM	2/22	38/221	0.5476		1	BovineHD0100003636	1	2	REC	0/24	2/257	1
1	ARS-BFGL-NGS-115663	12354879	1	0.06	0.04259	2	0.4761	1.435		1	ARS-BFGL-NGS-115663	1	2	DOM	3/22	22/248	0.4559		1	ARS-BFGL-NGS-115663	1	2	REC	0/25	1/269	1
1	BovineHD0100003683	12383178	2	0.2917	0.186	1	0.08686	1.801		1	BovineHD0100003683	2	1	DOM	12/12	90/168	0.182		1	BovineHD0100003683	2	1	REC	2/22	6/252	0.1418
1	BovineHD0100003686	12393568	2	0.34	0.468	1	0.102	0.5855		1	BovineHD0100003686	2	1	DOM	17/8	193/73	0.6436		1	BovineHD0100003686	2	1	REC	0/25	56/210	0.006315
1	BTA-54331-no-rs	12430421	2	0.14	0.07993	1	0.1782	1.874		1	BTA-54331-no-rs	2	1	DOM	7/18	42/227	0.1547		1	BTA-54331-no-rs	2	1	REC	0/25	1/268	1
1	Hapmap43879-BTA-54328	12455251	2	0.14	0.1463	1	1	0.95		1	Hapmap43879-BTA-54328	2	1	DOM	7/18	75/195	1		1	Hapmap43879-BTA-54328	2	1	REC	0/25	4/266	1
1	Hapmap55464-rs29015665	12475971	2	0.4	0.4907	1	0.239	0.6918		1	Hapmap55464-rs29015665	2	1	DOM	13/12	203/67	0.01766		1	Hapmap55464-rs29015665	2	1	REC	7/18	62/208	0.6217
1	BTA-54318-no-rs	12497912	1	0.26	0.3395	2	0.2765	0.6836		1	BTA-54318-no-rs	1	2	DOM	10/15	153/118	0.1418		1	BTA-54318-no-rs	1	2	REC	3/22	31/240	1
1	BovineHD0100003734	12569498	2	0.4	0.3914	1	1	1.037		1	BovineHD0100003734	2	1	DOM	15/10	167/100	0.831		1	BovineHD0100003734	2	1	REC	5/20	42/225	0.5712
1	BovineHD0100003761	12691827	1	0.3	0.3214	2	0.8743	0.9048		1	BovineHD0100003761	1	2	DOM	15/10	146/120	0.6784		1	BovineHD0100003761	1	2	REC	0/25	25/241	0.1455
1	BovineHD0100003770	12732497	2	0.3	0.3494	1	0.5366	0.7979		1	BovineHD0100003770	2	1	DOM	15/10	157/112	1		1	BovineHD0100003770	2	1	REC	0/25	31/238	0.08898
1	BTB-00005611	12803538	2	0.16	0.2915	1	0.04913	0.4629		1	BTB-00005611	2	1	DOM	8/17	137/134	0.09465		1	BTB-00005611	2	1	REC	0/25	21/250	0.2346
1	BovineHD0100003819	12940114	2	0.26	0.2566	1	1	1.018		1	BovineHD0100003819	2	1	DOM	9/16	123/142	0.4021		1	BovineHD0100003819	2	1	REC	4/21	13/252	0.04747
1	Hapmap60346-rs29019231	12988191	1	0.24	0.3653	2	0.08931	0.5486		1	Hapmap60346-rs29019231	1	2	DOM	11/14	167/104	0.09203		1	Hapmap60346-rs29019231	1	2	REC	1/24	31/240	0.4958
1	BovineHD0100003869	13110312	2	0.16	0.2926	1	0.04886	0.4605		1	BovineHD0100003869	2	1	DOM	8/17	136/134	0.09528		1	BovineHD0100003869	2	1	REC	0/25	22/248	0.2347
1	Hapmap38791-BTA-89194	13177821	2	0	0.07963	1	0.04069	0		1	Hapmap38791-BTA-89194	2	1	DOM	0/25	43/227	0.03306		1	Hapmap38791-BTA-89194	2	1	REC	0/25	0/270	1
1	BovineHD0100003917	13253220	1	0.16	0.1887	2	0.7073	0.819		1	BovineHD0100003917	1	2	DOM	8/17	94/171	0.8287		1	BovineHD0100003917	1	2	REC	0/25	6/259	1
1	ARS-BFGL-BAC-11044	13395358	1	0.12	0.2638	2	0.02611	0.3805		1	ARS-BFGL-BAC-11044	1	2	DOM	6/19	127/144	0.0348		1	ARS-BFGL-BAC-11044	1	2	REC	0/25	16/255	0.3772
1	BovineHD4100000092	13527122	1	0.26	0.2715	2	1	0.9426		1	BovineHD4100000092	1	2	DOM	11/14	127/140	0.8351		1	BovineHD4100000092	1	2	REC	2/23	18/249	0.6843
1	ARS-BFGL-BAC-685	13575805	1	0	0.08148	2	0.04202	0		1	ARS-BFGL-BAC-685	1	2	DOM	0/25	44/226	0.03403		1	ARS-BFGL-BAC-685	1	2	REC	0/25	0/270	1
1	BovineHD0100004029	13601105	2	0.2708	0.3547	1	0.2707	0.6759		1	BovineHD0100004029	2	1	DOM	11/13	156/102	0.1943		1	BovineHD0100004029	2	1	REC	2/22	27/231	1
1	BovineHD0100004039	13643769	1	0.25	0.334	2	0.2639	0.6648		1	BovineHD0100004039	1	2	DOM	10/14	150/115	0.1989		1	BovineHD0100004039	1	2	REC	2/22	27/238	1
1	Hapmap24222-BTA-88936	13665306	2	0.24	0.4151	1	0.01582	0.4449		1	Hapmap24222-BTA-88936	2	1	DOM	11/14	178/93	0.04809		1	Hapmap24222-BTA-88936	2	1	REC	1/24	47/224	0.09395
1	BovineHD0100004053	13702454	2	0.5	0.468	1	0.7673	1.137		1	BovineHD0100004053	2	1	DOM	18/7	196/70	0.8162		1	BovineHD0100004053	2	1	REC	7/18	53/213	0.3136
1	ARS-BFGL-NGS-21333	13877483	2	0.16	0.1278	1	0.5108	1.3		1	ARS-BFGL-NGS-21333	2	1	DOM	7/18	66/204	0.6372		1	ARS-BFGL-NGS-21333	2	1	REC	1/24	3/267	0.2996
1	BovineHD0100004106	13914324	1	0.36	0.3926	2	0.7622	0.8703		1	BovineHD0100004106	1	2	DOM	15/10	178/92	0.6608		1	BovineHD0100004106	1	2	REC	3/22	34/236	1
1	BovineHD0100004109	13925424	2	0.5	0.485	1	0.883	1.062		1	BovineHD0100004109	2	1	DOM	18/7	205/62	0.6237		1	BovineHD0100004109	2	1	REC	7/18	54/213	0.4385
1	BovineHD0100004147	14064963	2	0.36	0.3321	1	0.7541	1.131		1	BovineHD0100004147	2	1	DOM	16/9	150/115	0.5313		1	BovineHD0100004147	2	1	REC	2/23	26/239	1
1	BovineHD0100004161	14122474	1	0.34	0.2895	2	0.516	1.264		1	BovineHD0100004161	1	2	DOM	15/10	134/132	0.4069		1	BovineHD0100004161	1	2	REC	2/23	20/246	1
1	BovineHD0100004179	14218125	2	0.42	0.417	1	1	1.013		1	BovineHD0100004179	2	1	DOM	17/8	182/89	1		1	BovineHD0100004179	2	1	REC	4/21	44/227	1
1	BovineHD0100004186	14235061	1	0.46	0.3289	2	0.08465	1.738		1	BovineHD0100004186	1	2	DOM	17/8	154/109	0.4012		1	BovineHD0100004186	1	2	REC	6/19	19/244	0.01323
1	BovineHD0100004251	14380075	1	0.22	0.1455	2	0.1546	1.656		1	BovineHD0100004251	1	2	DOM	11/14	74/194	0.1059		1	BovineHD0100004251	1	2	REC	0/25	4/264	1
1	BovineHD0100004290	14505711	1	0.02	0.1161	2	0.03143	0.1554		1	BovineHD0100004290	1	2	DOM	1/24	57/210	0.03629		1	BovineHD0100004290	1	2	REC	0/25	5/262	1
1	BTA-103292-no-rs	14533366	2	0.18	0.08333	1	0.03611	2.415		1	BTA-103292-no-rs	2	1	DOM	9/16	45/225	0.02738		1	BTA-103292-no-rs	2	1	REC	0/25	0/270	1
1	ARS-BFGL-NGS-26402	14579710	2	0.04	0.09963	1	0.2118	0.3765		1	ARS-BFGL-NGS-26402	2	1	DOM	2/23	52/219	0.2757		1	ARS-BFGL-NGS-26402	2	1	REC	0/25	2/269	1
1	Hapmap24335-BTA-127763	14616735	1	0.44	0.4797	2	0.658	0.8522		1	Hapmap24335-BTA-127763	1	2	DOM	17/8	201/70	0.4847		1	Hapmap24335-BTA-127763	1	2	REC	5/20	59/212	1
1	ARS-BFGL-BAC-14883	14655035	1	0.12	0.1882	2	0.337	0.5882		1	ARS-BFGL-BAC-14883	1	2	DOM	6/19	94/177	0.3777		1	ARS-BFGL-BAC-14883	1	2	REC	0/25	8/263	1
1	BovineHD0100004342	14735286	1	0.42	0.4663	2	0.5563	0.8288		1	BovineHD0100004342	1	2	DOM	18/7	192/75	1		1	BovineHD0100004342	1	2	REC	3/22	57/210	0.4358
1	BovineHD0100004343	14740618	1	0.28	0.3365	2	0.5299	0.7669		1	BovineHD0100004343	1	2	DOM	14/11	145/121	1		1	BovineHD0100004343	1	2	REC	0/25	34/232	0.055
1	BovineHD0100004359	14783511	2	0.2708	0.3365	1	0.4244	0.7325		1	BovineHD0100004359	2	1	DOM	11/13	149/117	0.3939		1	BovineHD0100004359	2	1	REC	2/22	30/236	1
1	BovineHD0100004373	14824048	2	0.06	0.0653	1	1	0.9137		1	BovineHD0100004373	2	1	DOM	3/22	35/233	1		1	BovineHD0100004373	2	1	REC	0/25	0/268	1
1	BovineHD0100004398	14880156	2	0.46	0.417	1	0.5533	1.191		1	BovineHD0100004398	2	1	DOM	18/7	177/88	0.6623		1	BovineHD0100004398	2	1	REC	5/20	44/221	0.5875
1	BovineHD0100004435	15009567	1	0.2292	0.2672	2	0.7323	0.8154		1	BovineHD0100004435	1	2	DOM	11/13	117/145	1		1	BovineHD0100004435	1	2	REC	0/24	23/239	0.2358
1	ARS-BFGL-NGS-107530	15017291	1	0.26	0.2362	2	0.7291	1.136		1	ARS-BFGL-NGS-107530	1	2	DOM	11/14	115/156	1		1	ARS-BFGL-NGS-107530	1	2	REC	2/23	13/258	0.3673
1	BTB-01807638	15049490	2	0.18	0.1944	1	1	0.9094		1	BTB-01807638	2	1	DOM	8/17	95/175	0.8293		1	BTB-01807638	2	1	REC	1/24	10/260	1
1	BTA-28028-no-rs	15092475	1	0.04	0.09515	2	0.2994	0.3962		1	BTA-28028-no-rs	1	2	DOM	2/23	47/221	0.2755		1	BTA-28028-no-rs	1	2	REC	0/25	4/264	1
1	BTB-00502293	15126234	1	0.22	0.2066	2	0.8555	1.083		1	BTB-00502293	1	2	DOM	11/14	101/170	0.5237		1	BTB-00502293	1	2	REC	0/25	11/260	0.6078
1	BTA-97382-no-rs	15241004	1	0.4	0.3635	2	0.6465	1.168		1	BTA-97382-no-rs	1	2	DOM	16/9	168/103	1		1	BTA-97382-no-rs	1	2	REC	4/21	29/242	0.501
1	BovineHD0100004528	15381892	1	0.46	0.3759	2	0.2869	1.414		1	BovineHD0100004528	1	2	DOM	20/5	163/103	0.08261		1	BovineHD0100004528	1	2	REC	3/22	37/229	1
1	BovineHD0100004540	15430091	2	0.4167	0.3649	1	0.5324	1.243		1	BovineHD0100004540	2	1	DOM	17/7	156/103	0.3841		1	BovineHD0100004540	2	1	REC	3/21	33/226	1
1	Hapmap50227-BTA-113868	15440999	2	0.26	0.3192	1	0.4299	0.7494		1	Hapmap50227-BTA-113868	2	1	DOM	13/12	146/125	1		1	Hapmap50227-BTA-113868	2	1	REC	0/25	27/244	0.1453
1	BovineHD0100004550	15464786	1	0.36	0.3596	2	1	1.002		1	BovineHD0100004550	1	2	DOM	13/12	166/101	0.391		1	BovineHD0100004550	1	2	REC	5/20	26/241	0.1626
1	BovineHD0100004579	15508545	1	0.18	0.1842	2	1	0.9721		1	BovineHD0100004579	1	2	DOM	9/16	86/180	0.8238		1	BovineHD0100004579	1	2	REC	0/25	12/254	0.6083
1	BovineHD0100004592	15557674	2	0.38	0.4004	1	0.8802	0.9179		1	BovineHD0100004592	2	1	DOM	15/10	174/92	0.6622		1	BovineHD0100004592	2	1	REC	4/21	39/227	0.773
1	BovineHD4100000100	15577736	2	0.25	0.2738	1	0.8656	0.8843		1	BovineHD4100000100	2	1	DOM	12/12	125/138	0.8343		1	BovineHD4100000100	2	1	REC	0/24	19/244	0.3839
1	ARS-BFGL-NGS-102441	15592825	2	0.26	0.2177	1	0.4795	1.262		1	ARS-BFGL-NGS-102441	2	1	DOM	11/14	110/161	0.8324		1	ARS-BFGL-NGS-102441	2	1	REC	2/23	8/263	0.2029
1	ARS-BFGL-BAC-13008	15612315	2	0.28	0.2232	1	0.3791	1.353		1	ARS-BFGL-BAC-13008	2	1	DOM	12/13	111/160	0.5292		1	ARS-BFGL-BAC-13008	2	1	REC	2/23	10/261	0.2686
1	BTA-113886-no-rs	15643337	2	0.48	0.5	1	0.8827	0.9231		1	BTA-113886-no-rs	2	1	DOM	18/7	202/68	0.8108		1	BTA-113886-no-rs	2	1	REC	6/19	68/202	1
1	BTA-113888-no-rs	15669879	2	0.22	0.1685	1	0.334	1.392		1	BTA-113888-no-rs	2	1	DOM	10/15	87/183	0.505		1	BTA-113888-no-rs	2	1	REC	1/24	4/266	0.3598
1	BovineHD0100004654	15699132	1	0.02083	0.03053	2	1	0.6755		1	BovineHD0100004654	1	2	DOM	1/23	16/246	1		1	BovineHD0100004654	1	2	REC	0/24	0/262	1
1	BovineHD0100004673	15757230	1	0.1	0.1245	2	0.8214	0.7811		1	BovineHD0100004673	1	2	DOM	5/20	65/200	0.8075		1	BovineHD0100004673	1	2	REC	0/25	1/264	1
1	BovineHD0100004686	15816006	1	0.02	0.07331	2	0.2392	0.258		1	BovineHD0100004686	1	2	DOM	1/24	39/227	0.2215		1	BovineHD0100004686	1	2	REC	0/25	0/266	1
1	BovineHD0100004731	16007329	1	0.14	0.218	2	0.2757	0.5838		1	BovineHD0100004731	1	2	DOM	7/18	103/163	0.3891		1	BovineHD0100004731	1	2	REC	0/25	13/253	0.6122
1	Hapmap58809-rs29017514	16044068	2	0.24	0.1771	1	0.2564	1.467		1	Hapmap58809-rs29017514	2	1	DOM	10/15	92/179	0.6605		1	Hapmap58809-rs29017514	2	1	REC	2/23	4/267	0.08331
1	BTB-01193581	16114873	2	0.34	0.345	1	1	0.978		1	BTB-01193581	2	1	DOM	15/10	151/120	0.8337		1	BTB-01193581	2	1	REC	2/23	36/235	0.7534
1	BTB-00569345	16155668	1	0.22	0.2435	2	0.8631	0.8761		1	BTB-00569345	1	2	DOM	11/14	110/161	0.8324		1	BTB-00569345	1	2	REC	0/25	22/249	0.2347
1	ARS-BFGL-NGS-95377	16186991	2	0.36	0.3796	1	0.8792	0.9192		1	ARS-BFGL-NGS-95377	2	1	DOM	13/12	171/99	0.2853		1	ARS-BFGL-NGS-95377	2	1	REC	5/20	34/236	0.3488
1	BTB-01193494	16265007	1	0.36	0.2985	2	0.4214	1.322		1	BTB-01193494	1	2	DOM	13/12	142/126	1		1	BTB-01193494	1	2	REC	5/20	18/250	0.03483
1	ARS-BFGL-NGS-109692	16306198	1	0	0.08148	2	0.04202	0		1	ARS-BFGL-NGS-109692	1	2	DOM	0/25	43/227	0.03306		1	ARS-BFGL-NGS-109692	1	2	REC	0/25	1/269	1
1	BovineHD0100004829	16330432	2	0.14	0.2113	1	0.275	0.6076		1	BovineHD0100004829	2	1	DOM	7/18	99/166	0.3938		1	BovineHD0100004829	2	1	REC	0/25	13/252	0.6124
1	BovineHD0100004833	16355046	2	0.5208	0.4676	1	0.5465	1.238		1	BovineHD0100004833	2	1	DOM	19/5	190/72	0.6325		1	BovineHD0100004833	2	1	REC	6/18	55/207	0.6093
1	Hapmap41782-BTA-16216	16362952	2	0.14	0.1667	1	0.8416	0.814		1	Hapmap41782-BTA-16216	2	1	DOM	7/18	87/183	0.8234		1	Hapmap41782-BTA-16216	2	1	REC	0/25	3/267	1
1	BTB-01999110	16403017	2	0.38	0.3926	1	1	0.9483		1	BTB-01999110	2	1	DOM	15/10	174/96	0.6676		1	BTB-01999110	2	1	REC	4/21	38/232	0.7661
1	ARS-BFGL-NGS-32422	16447333	1	0.5	0.4944	2	1	1.022		1	ARS-BFGL-NGS-32422	1	2	DOM	17/8	205/65	0.4666		1	ARS-BFGL-NGS-32422	1	2	REC	8/17	62/208	0.3282
1	BovineHD0100004898	16579388	2	0.42	0.3571	1	0.4419	1.303		1	BovineHD0100004898	2	1	DOM	16/9	158/108	0.8315		1	BovineHD0100004898	2	1	REC	5/20	32/234	0.3399
1	BTA-110801-no-rs	16604159	2	0.4	0.3229	1	0.274	1.398		1	BTA-110801-no-rs	2	1	DOM	18/7	146/125	0.09452		1	BTA-110801-no-rs	2	1	REC	2/23	29/242	1
1	BovineHD0100004919	16643923	1	0.1042	0.2356	2	0.04511	0.3772		1	BovineHD0100004919	1	2	DOM	5/19	113/148	0.04928		1	BovineHD0100004919	1	2	REC	0/24	10/251	1
1	BovineHD0100004926	16666424	1	0.1042	0.2433	2	0.03094	0.3617		1	BovineHD0100004926	1	2	DOM	5/19	117/144	0.02979		1	BovineHD0100004926	1	2	REC	0/24	10/251	1
1	BTB-01919348	16705237	1	0.02	0.06089	2	0.3468	0.3148		1	BTB-01919348	1	2	DOM	1/24	33/238	0.3312		1	BTB-01919348	1	2	REC	0/25	0/271	1
1	BTB-01084253	16754495	2	0.1	0.09594	1	0.8063	1.047		1	BTB-01084253	2	1	DOM	5/20	51/220	0.7954		1	BTB-01084253	2	1	REC	0/25	1/270	1
1	ARS-BFGL-NGS-41853	16844981	2	0.14	0.2103	1	0.2758	0.6112		1	ARS-BFGL-NGS-41853	2	1	DOM	7/18	102/169	0.3924		1	ARS-BFGL-NGS-41853	2	1	REC	0/25	12/259	0.6082
1	BovineHD0100004973	16859361	2	0.44	0.4539	1	0.883	0.9454		1	BovineHD0100004973	2	1	DOM	16/9	194/77	0.4902		1	BovineHD0100004973	2	1	REC	6/19	52/219	0.5986
1	BovineHD0100004984	16929334	2	0	0.09963	1	0.009781	0		1	BovineHD0100004984	2	1	DOM	0/25	52/219	0.01115		1	BovineHD0100004984	2	1	REC	0/25	2/269	1
1	BTB-01083987	16967412	1	0.38	0.4151	2	0.6558	0.8635		1	BTB-01083987	1	2	DOM	15/10	179/92	0.6605		1	BTB-01083987	1	2	REC	4/21	46/225	1
1	Hapmap51162-BTA-118728	16993213	2	0.52	0.4908	1	0.7681	1.124		1	Hapmap51162-BTA-118728	2	1	DOM	17/8	203/68	0.4752		1	Hapmap51162-BTA-118728	2	1	REC	9/16	63/208	0.2205
1	ARS-BFGL-NGS-22727	17041419	1	0.38	0.3579	2	0.7599	1.099		1	ARS-BFGL-NGS-22727	1	2	DOM	13/12	162/109	0.5251		1	ARS-BFGL-NGS-22727	1	2	REC	6/19	32/239	0.1103
1	BTB-01872049	17105670	1	0.14	0.2085	2	0.3567	0.618		1	BTB-01872049	1	2	DOM	7/18	107/164	0.2907		1	BTB-01872049	1	2	REC	0/25	6/265	1
1	BovineHD0100005059	17170037	2	0.22	0.3276	1	0.152	0.5789		1	BovineHD0100005059	2	1	DOM	11/14	151/110	0.2082		1	BovineHD0100005059	2	1	REC	0/25	20/241	0.2342
1	BTA-118719-no-rs	17192788	2	0.22	0.329	1	0.1527	0.5753		1	BTA-118719-no-rs	2	1	DOM	11/14	156/113	0.2076		1	BTA-118719-no-rs	2	1	REC	0/25	21/248	0.2343
1	Hapmap60239-rs29019581	17235751	2	0.22	0.2823	1	0.4108	0.7171		1	Hapmap60239-rs29019581	2	1	DOM	11/14	136/135	0.6769		1	Hapmap60239-rs29019581	2	1	REC	0/25	17/254	0.3773
1	Hapmap39625-BTA-118605	17263605	2	0.22	0.2528	1	0.7333	0.8337		1	Hapmap39625-BTA-118605	2	1	DOM	11/14	122/147	1		1	Hapmap39625-BTA-118605	2	1	REC	0/25	14/255	0.6175
1	BTB-00757818	17350471	1	0.38	0.3654	2	0.8783	1.065		1	BTB-00757818	1	2	DOM	13/12	161/99	0.3918		1	BTB-00757818	1	2	REC	6/19	29/231	0.1006
1	BovineHD0100005100	17410539	1	0.48	0.3628	2	0.1255	1.621		1	BovineHD0100005100	1	2	DOM	17/8	166/100	0.6686		1	BovineHD0100005100	1	2	REC	7/18	27/239	0.01627
1	BTB-00757888	17441499	1	0.44	0.4133	2	0.765	1.115		1	BTB-00757888	1	2	DOM	17/8	184/87	1		1	BTB-00757888	1	2	REC	5/20	40/231	0.5578
1	ARS-BFGL-NGS-51809	17481344	1	0.46	0.4291	2	0.7656	1.133		1	ARS-BFGL-NGS-51809	1	2	DOM	18/7	183/85	0.8236		1	ARS-BFGL-NGS-51809	1	2	REC	5/20	47/221	0.7845
1	BTA-118731-no-rs	17513897	2	0.5	0.5	1	1	1		1	BTA-118731-no-rs	2	1	DOM	17/8	208/63	0.3324		1	BTA-118731-no-rs	2	1	REC	8/17	63/208	0.3324
1	BovineHD0100005160	17549923	2	0.42	0.4234	1	1	0.9863		1	BovineHD0100005160	2	1	DOM	16/9	173/88	0.8273		1	BovineHD0100005160	2	1	REC	5/20	48/213	0.7911
1	BovineHD0100005187	17604891	2	0.24	0.2746	1	0.7396	0.8341		1	BovineHD0100005187	2	1	DOM	12/13	126/138	1		1	BovineHD0100005187	2	1	REC	0/25	19/245	0.3882
1	BovineHD0100005191	17630258	2	0.12	0.1553	1	0.6802	0.7417		1	BovineHD0100005191	2	1	DOM	6/19	73/191	0.817		1	BovineHD0100005191	2	1	REC	0/25	9/255	1
1	Hapmap54349-rs29011587	17672335	2	0.14	0.0572	1	0.03267	2.683		1	Hapmap54349-rs29011587	2	1	DOM	7/18	30/241	0.02379		1	Hapmap54349-rs29011587	2	1	REC	0/25	1/270	1
1	Hapmap48613-BTA-112066	17806576	2	0.14	0.125	1	0.8231	1.14		1	Hapmap48613-BTA-112066	2	1	DOM	7/18	64/204	0.6303		1	Hapmap48613-BTA-112066	2	1	REC	0/25	3/265	1
1	BTA-20344-no-rs	17839302	2	0.16	0.07196	1	0.04832	2.457		1	BTA-20344-no-rs	2	1	DOM	8/17	38/233	0.03698		1	BTA-20344-no-rs	2	1	REC	0/25	1/270	1
1	BovineHD0100005238	17886413	1	0.26	0.3314	2	0.3458	0.7087		1	BovineHD0100005238	1	2	DOM	12/13	150/114	0.4077		1	BovineHD0100005238	1	2	REC	1/24	25/239	0.7113
1	ARS-BFGL-NGS-112632	17933659	1	0.38	0.4502	2	0.3745	0.7485		1	ARS-BFGL-NGS-112632	1	2	DOM	13/12	191/80	0.07047		1	ARS-BFGL-NGS-112632	1	2	REC	6/19	53/218	0.6027
1	BTB-00005987	17957377	1	0.44	0.2712	2	0.01422	2.111		1	BTB-00005987	1	2	DOM	19/6	128/143	0.006421		1	BTB-00005987	1	2	REC	3/22	19/252	0.4135
1	Hapmap44269-BTA-67047	18013704	1	0.18	0.316	2	0.05325	0.4752		1	Hapmap44269-BTA-67047	1	2	DOM	9/16	145/124	0.0971		1	Hapmap44269-BTA-67047	1	2	REC	0/25	25/244	0.1461
1	BovineHD0100005323	18165726	1	0.4583	0.4808	2	0.8802	0.9136		1	BovineHD0100005323	1	2	DOM	18/6	197/64	1		1	BovineHD0100005323	1	2	REC	4/20	54/207	0.7944
1	BovineHD0100005338	18249935	2	0.46	0.4944	1	0.6602	0.8713		1	BovineHD0100005338	2	1	DOM	19/6	197/69	1		1	BovineHD0100005338	2	1	REC	4/21	66/200	0.4634
1	ARS-BFGL-NGS-26632	18299875	1	0.38	0.2915	2	0.1988	1.49		1	ARS-BFGL-NGS-26632	1	2	DOM	16/9	135/136	0.2117		1	ARS-BFGL-NGS-26632	1	2	REC	3/22	23/248	0.4703
1	BovineHD0100005358	18336197	1	0.1458	0.1353	2	0.8264	1.091		1	BovineHD0100005358	1	2	DOM	7/17	61/205	0.4603		1	BovineHD0100005358	1	2	REC	0/24	11/255	0.6082
1	BovineHD0100005377	18360408	1	0.2708	0.2167	2	0.369	1.342		1	BovineHD0100005377	1	2	DOM	11/13	107/156	0.668		1	BovineHD0100005377	1	2	REC	2/22	7/256	0.1681
1	BTB-00006408	18378081	1	0.12	0.2201	2	0.1057	0.4831		1	BTB-00006408	1	2	DOM	6/19	110/158	0.1335		1	BTB-00006408	1	2	REC	0/25	8/260	1
1	Hapmap28603-BTA-123758	18439746	1	0	0.01107	2	1	0		1	Hapmap28603-BTA-123758	1	2	DOM	0/25	6/265	1		1	Hapmap28603-BTA-123758	1	2	REC	0/25	0/271	1
1	BovineHD0100005444	18544855	2	0.2917	0.3008	1	1	0.9574		1	BovineHD0100005444	2	1	DOM	12/12	136/130	1		1	BovineHD0100005444	2	1	REC	2/22	24/242	1
1	BTB-01511695	18608496	2	0.3	0.3315	1	0.7536	0.8643		1	BTB-01511695	2	1	DOM	13/12	155/115	0.6747		1	BTB-01511695	2	1	REC	2/23	24/246	1
1	BTB-01511764	18640129	1	0.54	0.4114	2	0.0991	1.679		1	BTB-01511764	1	2	DOM	19/6	181/90	0.5032		1	BTB-01511764	1	2	REC	8/17	42/229	0.04841
1	BTB-01931918	18679090	2	0.36	0.4686	1	0.1816	0.6378		1	BTB-01931918	2	1	DOM	13/12	199/72	0.03478		1	BTB-01931918	2	1	REC	5/20	55/216	1
1	Hapmap50395-BTA-57301	18735528	2	0.3	0.2944	1	1	1.027		1	Hapmap50395-BTA-57301	2	1	DOM	13/12	136/134	1		1	Hapmap50395-BTA-57301	2	1	REC	2/23	23/247	1
1	BTA-06080-no-rs	18758458	2	0.34	0.2974	1	0.5227	1.217		1	BTA-06080-no-rs	2	1	DOM	15/10	137/132	0.4109		1	BTA-06080-no-rs	2	1	REC	2/23	23/246	1
1	BovineHD0100005509	18764873	1	0.46	0.4591	2	1	1.004		1	BovineHD0100005509	1	2	DOM	19/6	199/70	1		1	BovineHD0100005509	1	2	REC	4/21	48/221	1
1	Hapmap33466-BTA-107178	18789066	1	0.28	0.1586	2	0.0457	2.063		1	Hapmap33466-BTA-107178	1	2	DOM	12/13	80/188	0.07265		1	Hapmap33466-BTA-107178	1	2	REC	2/23	5/263	0.1126
1	BovineHD0100005518	18826962	2	0.12	0.1386	1	0.8322	0.8477		1	BovineHD0100005518	2	1	DOM	6/19	70/197	1		1	BovineHD0100005518	2	1	REC	0/25	4/263	1
1	BovineHD0100005525	18866155	2	0.26	0.3962	1	0.06792	0.5354		1	BovineHD0100005525	2	1	DOM	13/12	178/87	0.1841		1	BovineHD0100005525	2	1	REC	0/25	32/233	0.08959
1	BovineHD0100005531	18918611	1	0.12	0.2085	2	0.1948	0.5177		1	BovineHD0100005531	1	2	DOM	6/19	97/174	0.2785		1	BovineHD0100005531	1	2	REC	0/25	16/255	0.3772
1	BTB-01890165	18976190	1	0.02	0.01107	2	0.4626	1.823		1	BTB-01890165	1	2	DOM	1/24	6/265	0.4644		1	BTB-01890165	1	2	REC	0/25	0/271	1
1	BTB-01342789	19016808	1	0.22	0.3593	2	0.06148	0.503		1	BTB-01342789	1	2	DOM	11/14	162/108	0.1395		1	BTB-01342789	1	2	REC	0/25	32/238	0.08928
1	ARS-BFGL-NGS-1797	19040936	1	0.14	0.1919	2	0.4514	0.6856		1	ARS-BFGL-NGS-1797	1	2	DOM	7/18	90/181	0.6626		1	ARS-BFGL-NGS-1797	1	2	REC	0/25	14/257	0.617
1	Hapmap47551-BTA-25902	19086376	2	0.22	0.2852	1	0.4106	0.707		1	Hapmap47551-BTA-25902	2	1	DOM	10/15	135/135	0.4054		1	Hapmap47551-BTA-25902	2	1	REC	1/24	19/251	1
1	BTA-120923-no-rs	19161658	2	0.16	0.2732	1	0.09381	0.5066		1	BTA-120923-no-rs	2	1	DOM	8/17	135/134	0.09601		1	BTA-120923-no-rs	2	1	REC	0/25	12/257	0.6082
1	BTA-26174-no-rs	19232342	2	0.22	0.2907	1	0.329	0.6881		1	BTA-26174-no-rs	2	1	DOM	10/15	137/133	0.4036		1	BTA-26174-no-rs	2	1	REC	1/24	20/250	1
1	ARS-BFGL-NGS-111605	19266922	1	0.64	0.4465	2	0.01122	2.204		1	ARS-BFGL-NGS-111605	1	2	DOM	23/2	184/87	0.01111		1	ARS-BFGL-NGS-111605	1	2	REC	9/16	58/213	0.1304
1	ARS-BFGL-NGS-94650	19417856	2	0.3	0.1778	1	0.05609	1.982		1	ARS-BFGL-NGS-94650	2	1	DOM	14/11	93/177	0.04835		1	ARS-BFGL-NGS-94650	2	1	REC	1/24	3/267	0.2996
1	BovineHD0100005653	19448177	1	0.38	0.4943	2	0.1395	0.6269		1	BovineHD0100005653	1	2	DOM	17/8	207/58	0.316		1	BovineHD0100005653	1	2	REC	2/23	55/210	0.1861
1	ARS-BFGL-NGS-7429	19455564	1	0.34	0.3783	2	0.6489	0.8467		1	ARS-BFGL-NGS-7429	1	2	DOM	13/12	167/100	0.3898		1	ARS-BFGL-NGS-7429	1	2	REC	4/21	35/232	0.7569
1	BTA-39405-no-rs	19485982	1	0.3	0.1922	2	0.09467	1.802		1	BTA-39405-no-rs	1	2	DOM	14/11	98/170	0.08321		1	BTA-39405-no-rs	1	2	REC	1/24	5/263	0.4172
1	BovineHD0100005688	19507076	2	0.4375	0.3629	1	0.3487	1.365		1	BovineHD0100005688	2	1	DOM	17/7	163/96	0.5118		1	BovineHD0100005688	2	1	REC	4/20	25/234	0.287
1	BovineHD0100005700	19560010	1	0.2708	0.4045	2	0.08898	0.5468		1	BovineHD0100005700	1	2	DOM	12/12	173/94	0.1842		1	BovineHD0100005700	1	2	REC	1/23	43/224	0.1447
1	BovineHD0100005713	19629594	1	0.25	0.3421	2	0.2631	0.641		1	BovineHD0100005713	1	2	DOM	11/13	157/109	0.2803		1	BovineHD0100005713	1	2	REC	1/23	25/241	0.7077
1	ARS-BFGL-NGS-29732	19691110	1	0.44	0.4889	2	0.5558	0.8213		1	ARS-BFGL-NGS-29732	1	2	DOM	19/6	201/70	1		1	ARS-BFGL-NGS-29732	1	2	REC	3/22	64/207	0.2205
1	BovineHD0100005771	19903346	1	0.2917	0.2996	2	1	0.9625		1	BovineHD0100005771	1	2	DOM	11/13	137/130	0.673		1	BovineHD0100005771	1	2	REC	3/21	23/244	0.4604
1	BovineHD0100005782	19928368	2	0.3542	0.4655	1	0.1727	0.6296		1	BovineHD0100005782	2	1	DOM	15/9	187/74	0.3537		1	BovineHD0100005782	2	1	REC	2/22	56/205	0.1841
1	Hapmap38278-BTA-104803	19938721	2	0	0.01661	1	1	0		1	Hapmap38278-BTA-104803	2	1	DOM	0/25	9/262	1		1	Hapmap38278-BTA-104803	2	1	REC	0/25	0/271	1
1	BovineHD0100005789	19957793	1	0.44	0.412	2	0.7645	1.121		1	BovineHD0100005789	1	2	DOM	19/6	176/91	0.3784		1	BovineHD0100005789	1	2	REC	3/22	44/223	0.7773
1	BovineHD0100005800	20008856	1	0.3958	0.2816	2	0.09944	1.671		1	BovineHD0100005800	1	2	DOM	17/7	133/128	0.08621		1	BovineHD0100005800	1	2	REC	2/22	14/247	0.633
1	BovineHD0100005805	20026148	2	0.28	0.3893	1	0.1699	0.6101		1	BovineHD0100005805	2	1	DOM	14/11	182/89	0.2744		1	BovineHD0100005805	2	1	REC	0/25	29/242	0.15
1	BovineHD0100005816	20073891	1	0.3958	0.2973	2	0.1897	1.548		1	BovineHD0100005816	1	2	DOM	17/7	140/124	0.1329		1	BovineHD0100005816	1	2	REC	2/22	17/247	0.6646
1	BTA-119061-no-rs	20099965	1	0.16	0.0738	2	0.0514	2.39		1	BTA-119061-no-rs	1	2	DOM	7/18	40/231	0.09066		1	BTA-119061-no-rs	1	2	REC	1/24	0/271	0.08446
1	UA-IFASA-3994	20175310	1	0.24	0.2204	2	0.7243	1.117		1	UA-IFASA-3994	1	2	DOM	12/13	109/161	0.5257		1	UA-IFASA-3994	1	2	REC	0/25	10/260	1
1	BovineHD0100005852	20214044	2	0.2292	0.2256	1	1	1.021		1	BovineHD0100005852	2	1	DOM	11/13	109/157	0.6697		1	BovineHD0100005852	2	1	REC	0/24	11/255	0.6082
1	ARS-BFGL-BAC-11750	20285787	2	0.4	0.2878	1	0.1067	1.65		1	ARS-BFGL-BAC-11750	2	1	DOM	18/7	141/130	0.06146		1	ARS-BFGL-BAC-11750	2	1	REC	2/23	15/256	0.6442
1	Hapmap51222-BTA-39456	20312624	1	0.44	0.4907	2	0.5551	0.8155		1	Hapmap51222-BTA-39456	1	2	DOM	20/5	200/69	0.636		1	Hapmap51222-BTA-39456	1	2	REC	2/23	64/205	0.08107
1	BovineHD0100005901	20320335	2	0.08333	0.1307	1	0.4957	0.6047		1	BovineHD0100005901	2	1	DOM	4/20	68/196	0.461		1	BovineHD0100005901	2	1	REC	0/24	1/263	1
1	ARS-BFGL-NGS-34218	20336514	2	0.44	0.4	1	0.6515	1.179		1	ARS-BFGL-NGS-34218	2	1	DOM	18/7	175/90	0.6601		1	ARS-BFGL-NGS-34218	2	1	REC	4/21	37/228	0.7647
1	Hapmap51978-BTA-39455	20362107	1	0.16	0.3007	2	0.03485	0.4429		1	Hapmap51978-BTA-39455	1	2	DOM	8/17	142/129	0.06059		1	Hapmap51978-BTA-39455	1	2	REC	0/25	21/250	0.2346
1	BovineHD0100005920	20416935	1	0.4167	0.4034	2	0.8787	1.056		1	BovineHD0100005920	1	2	DOM	14/10	170/94	0.6578		1	BovineHD0100005920	1	2	REC	6/18	43/221	0.2647
1	BovineHD0100005928	20440130	2	0.52	0.476	1	0.5582	1.193		1	BovineHD0100005928	2	1	DOM	17/8	191/80	0.8206		1	BovineHD0100005928	2	1	REC	9/16	67/204	0.2343
1	BovineHD0100005950	20541415	2	0.3542	0.3665	1	1	0.9477		1	BovineHD0100005950	2	1	DOM	15/9	156/110	0.8297		1	BovineHD0100005950	2	1	REC	2/22	39/227	0.5481
1	ARS-BFGL-NGS-116430	20588929	2	0.3	0.2926	1	0.8727	1.036		1	ARS-BFGL-NGS-116430	2	1	DOM	12/13	143/127	0.6793		1	ARS-BFGL-NGS-116430	2	1	REC	3/22	15/255	0.1872
1	BovineHD0100005970	20601715	2	0.02083	0.1154	1	0.04795	0.1631		1	BovineHD0100005970	2	1	DOM	1/23	59/201	0.03498		1	BovineHD0100005970	2	1	REC	0/24	1/259	1
1	BovineHD0100005989	20653453	2	0.4167	0.4682	1	0.5472	0.8114		1	BovineHD0100005989	2	1	DOM	15/9	197/70	0.2378		1	BovineHD0100005989	2	1	REC	5/19	53/214	1
1	Hapmap49594-BTA-39447	20667934	2	0.04	0.1421	1	0.04799	0.2516		1	Hapmap49594-BTA-39447	2	1	DOM	2/23	75/196	0.03206		1	Hapmap49594-BTA-39447	2	1	REC	0/25	2/269	1
1	ARS-BFGL-BAC-15578	20694788	2	0.02	0.02214	1	1	0.9014		1	ARS-BFGL-BAC-15578	2	1	DOM	1/24	12/259	1		1	ARS-BFGL-BAC-15578	2	1	REC	0/25	0/271	1
1	ARS-BFGL-NGS-10334	20716311	1	0.4	0.4389	2	0.6561	0.8523		1	ARS-BFGL-NGS-10334	1	2	DOM	16/9	192/78	0.4938		1	ARS-BFGL-NGS-10334	1	2	REC	4/21	45/225	1
1	BovineHD0100006007	20731028	1	0.4583	0.3853	2	0.3553	1.35		1	BovineHD0100006007	1	2	DOM	18/6	174/92	0.3787		1	BovineHD0100006007	1	2	REC	4/20	31/235	0.5089
1	BovineHD0100006010	20744177	2	0.25	0.3726	1	0.1158	0.5613		1	BovineHD0100006010	2	1	DOM	12/12	165/94	0.1931		1	BovineHD0100006010	2	1	REC	0/24	28/231	0.1463
1	BovineHD0100006021	20780052	1	0.1	0.2804	2	0.004177	0.2851		1	BovineHD0100006021	1	2	DOM	5/20	136/135	0.005546		1	BovineHD0100006021	1	2	REC	0/25	16/255	0.3772
1	BTA-39438-no-rs	20799206	2	0.1	0.203	1	0.09234	0.4364		1	BTA-39438-no-rs	2	1	DOM	5/20	104/167	0.08344		1	BTA-39438-no-rs	2	1	REC	0/25	6/265	1
1	Hapmap28298-BTA-123775	20845227	2	0.6	0.4813	1	0.1386	1.616		1	Hapmap28298-BTA-123775	2	1	DOM	21/4	203/65	0.4634		1	Hapmap28298-BTA-123775	2	1	REC	9/16	55/213	0.08062
1	Hapmap28872-BTA-162555	20921794	2	0.1	0.2638	1	0.009744	0.31		1	Hapmap28872-BTA-162555	2	1	DOM	5/20	130/141	0.01051		1	Hapmap28872-BTA-162555	2	1	REC	0/25	13/258	0.6114
1	BTA-116769-no-rs	20960607	2	0.6	0.4123	1	0.01129	2.138		1	BTA-116769-no-rs	2	1	DOM	22/3	180/88	0.04002		1	BTA-116769-no-rs	2	1	REC	8/17	41/227	0.0465
1	Hapmap52794-rs29023743	21005976	2	0.32	0.2889	1	0.6288	1.158		1	Hapmap52794-rs29023743	2	1	DOM	13/12	141/129	1		1	Hapmap52794-rs29023743	2	1	REC	3/22	15/255	0.1872
1	BovineHD0100006078	21055167	1	0.2708	0.3102	2	0.6273	0.8261		1	BovineHD0100006078	1	2	DOM	12/12	143/123	0.8316		1	BovineHD0100006078	1	2	REC	1/23	22/244	0.7052
1	Hapmap54489-rs29018413	21096522	2	0.1	0.1956	1	0.1282	0.457		1	Hapmap54489-rs29018413	2	1	DOM	5/20	101/170	0.1253		1	Hapmap54489-rs29018413	2	1	REC	0/25	5/266	1
1	Hapmap60044-rs29010295	21136787	2	0.26	0.3542	1	0.2147	0.6405		1	Hapmap60044-rs29010295	2	1	DOM	12/13	164/107	0.2872		1	Hapmap60044-rs29010295	2	1	REC	1/24	28/243	0.4879
1	Hapmap26189-BTA-157760	21178292	2	0.16	0.1089	1	0.2505	1.559		1	Hapmap26189-BTA-157760	2	1	DOM	7/18	58/213	0.4523		1	Hapmap26189-BTA-157760	2	1	REC	1/24	1/270	0.162
1	ARS-BFGL-NGS-68915	21199202	1	0.34	0.2934	2	0.5188	1.241		1	ARS-BFGL-NGS-68915	1	2	DOM	15/10	135/136	0.4048		1	ARS-BFGL-NGS-68915	1	2	REC	2/23	24/247	1
1	UA-IFASA-1500	21277546	2	0.4	0.3598	1	0.6451	1.186		1	UA-IFASA-1500	2	1	DOM	16/9	163/108	0.8318		1	UA-IFASA-1500	2	1	REC	4/21	32/239	0.5232
1	UA-IFASA-9700	21310574	2	0.34	0.2915	1	0.5174	1.252		1	UA-IFASA-9700	2	1	DOM	15/10	135/136	0.4048		1	UA-IFASA-9700	2	1	REC	2/23	23/248	1
1	Hapmap39987-BTA-25749	21358879	1	0.42	0.4077	2	0.8814	1.052		1	Hapmap39987-BTA-25749	1	2	DOM	17/8	175/96	0.8289		1	Hapmap39987-BTA-25749	1	2	REC	4/21	46/225	1
1	BovineHD0100006201	21422169	2	0.16	0.3487	1	0.007105	0.3558		1	BovineHD0100006201	2	1	DOM	8/17	162/109	0.01022		1	BovineHD0100006201	2	1	REC	0/25	27/244	0.1453
1	ARS-BFGL-NGS-41203	21457294	2	0.42	0.4188	1	1	1.005		1	ARS-BFGL-NGS-41203	2	1	DOM	16/9	181/90	0.8258		1	ARS-BFGL-NGS-41203	2	1	REC	5/20	46/225	0.7812
1	Hapmap49929-BTA-24619	21533511	1	0.42	0.4613	2	0.657	0.8458		1	Hapmap49929-BTA-24619	1	2	DOM	16/9	198/73	0.3535		1	Hapmap49929-BTA-24619	1	2	REC	5/20	52/219	1
1	BovineHD0100006241	21565267	2	0.1	0.1222	1	0.8211	0.798		1	BovineHD0100006241	2	1	DOM	5/20	63/207	0.8087		1	BovineHD0100006241	2	1	REC	0/25	3/267	1
1	BovineHD0100006242	21574750	2	0.34	0.2528	1	0.1809	1.523		1	BovineHD0100006242	2	1	DOM	15/10	124/147	0.2103		1	BovineHD0100006242	2	1	REC	2/23	13/258	0.3673
1	BovineHD0100006253	21599174	2	0.62	0.4294	1	0.01122	2.168		1	BovineHD0100006253	2	1	DOM	22/3	189/80	0.06523		1	BovineHD0100006253	2	1	REC	9/16	42/227	0.02237
1	ARS-BFGL-NGS-100534	21646634	1	0.44	0.2952	2	0.03802	1.876		1	ARS-BFGL-NGS-100534	1	2	DOM	18/7	142/129	0.09171		1	ARS-BFGL-NGS-100534	1	2	REC	4/21	18/253	0.1017
1	BovineHD0100006280	21662722	1	0.42	0.4315	2	1	0.9541		1	BovineHD0100006280	1	2	DOM	16/9	187/83	0.6528		1	BovineHD0100006280	1	2	REC	5/20	46/224	0.7815
1	BovineHD0100006290	21691443	1	0.14	0.3426	2	0.002592	0.3124		1	BovineHD0100006290	1	2	DOM	7/18	155/115	0.005847		1	BovineHD0100006290	1	2	REC	0/25	30/240	0.08986
1	Hapmap53902-rs29027390	21725158	1	0.58	0.3506	2	0.001966	2.558		1	Hapmap53902-rs29027390	1	2	DOM	21/4	158/113	0.01703		1	Hapmap53902-rs29027390	1	2	REC	8/17	32/239	0.01044
1	BovineHD0100006309	21744486	2	0.3	0.3537	1	0.5358	0.7831		1	BovineHD0100006309	2	1	DOM	12/13	161/109	0.292		1	BovineHD0100006309	2	1	REC	3/22	30/240	0.7496
1	BovineHD0100006311	21750572	1	0.1	0.1718	2	0.2347	0.5358		1	BovineHD0100006311	1	2	DOM	5/20	81/181	0.361		1	BovineHD0100006311	1	2	REC	0/25	9/253	1
1	BTB-01332122	21764241	1	0.3	0.3469	2	0.5379	0.807		1	BTB-01332122	1	2	DOM	12/13	158/113	0.3986		1	BTB-01332122	1	2	REC	3/22	30/241	0.7488
1	BovineHD0100006326	21792273	1	0.42	0.3926	2	0.7629	1.12		1	BovineHD0100006326	1	2	DOM	15/10	170/100	0.83		1	BovineHD0100006326	1	2	REC	6/19	42/228	0.2641
1	BTB-01210202	21828827	2	0	0.02214	1	0.6122	0		1	BTB-01210202	2	1	DOM	0/25	12/259	0.6082		1	BTB-01210202	2	1	REC	0/25	0/271	1
1	BovineHD0100006343	21849432	2	0.26	0.4291	1	0.02381	0.4675		1	BovineHD0100006343	2	1	DOM	12/13	176/92	0.08504		1	BovineHD0100006343	2	1	REC	1/24	54/214	0.05825
1	BovineHD0100006365	21909852	2	0.14	0.1852	1	0.5649	0.7163		1	BovineHD0100006365	2	1	DOM	7/18	89/181	0.8238		1	BovineHD0100006365	2	1	REC	0/25	11/259	0.6077
1	BTB-01210232	21927942	2	0	0.02952	1	0.3844	0		1	BTB-01210232	2	1	DOM	0/25	16/255	0.3772		1	BTB-01210232	2	1	REC	0/25	0/271	1
1	BTB-01116114	22034195	2	0.18	0.3192	1	0.05338	0.4682		1	BTB-01116114	2	1	DOM	8/17	148/123	0.03638		1	BTB-01116114	2	1	REC	1/24	25/246	0.7095
1	BovineHD0100006395	22053575	2	0.02	0.1352	1	0.01314	0.1306		1	BovineHD0100006395	2	1	DOM	1/24	70/200	0.01272		1	BovineHD0100006395	2	1	REC	0/25	3/267	1
1	BovineHD0100006403	22090208	2	0.02	0.2199	1	0.0001594	0.07239		1	BovineHD0100006403	2	1	DOM	1/24	103/163	0.0002724		1	BovineHD0100006403	2	1	REC	0/25	14/252	0.6184
1	BovineHD0100006405	22101301	2	0.2	0.2041	1	1	0.9748		1	BovineHD0100006405	2	1	DOM	8/17	101/166	0.6681		1	BovineHD0100006405	2	1	REC	2/23	8/259	0.2073
1	BovineHD0100006407	22106567	1	0.2	0.2698	2	0.3184	0.6766		1	BovineHD0100006407	1	2	DOM	8/17	127/138	0.1457		1	BovineHD0100006407	1	2	REC	2/23	16/249	0.66
1	Hapmap42716-BTA-88423	22125251	1	0	0.06827	2	0.06277	0		1	Hapmap42716-BTA-88423	1	2	DOM	0/25	36/235	0.05414		1	Hapmap42716-BTA-88423	1	2	REC	0/25	1/270	1
1	BTB-01897472	22210184	2	0.34	0.4963	1	0.0385	0.5228		1	BTB-01897472	2	1	DOM	12/13	203/68	0.008172		1	BTB-01897472	2	1	REC	5/20	66/205	0.8077
1	BTA-07140-rs29026807	22267765	2	0	0.05351	1	0.1604	0		1	BTA-07140-rs29026807	2	1	DOM	0/25	29/242	0.15		1	BTA-07140-rs29026807	2	1	REC	0/25	0/271	1
1	BovineHD0100006446	22274799	1	0	0.06391	2	0.1043	0		1	BovineHD0100006446	1	2	DOM	0/25	34/232	0.055		1	BovineHD0100006446	1	2	REC	0/25	0/266	1
1	BovineHD0100006466	22338247	2	0.28	0.4326	1	0.03702	0.5101		1	BovineHD0100006466	2	1	DOM	14/11	191/76	0.1134		1	BovineHD0100006466	2	1	REC	0/25	40/227	0.03249
1	ARS-BFGL-NGS-51361	22359893	2	0.2	0.2804	1	0.2496	0.6414		1	ARS-BFGL-NGS-51361	2	1	DOM	10/15	131/140	0.5313		1	ARS-BFGL-NGS-51361	2	1	REC	0/25	21/250	0.2346
1	ARS-BFGL-BAC-15637	22421404	2	0.02	0.1052	1	0.04847	0.1736		1	ARS-BFGL-BAC-15637	2	1	DOM	1/24	56/215	0.05919		1	ARS-BFGL-BAC-15637	2	1	REC	0/25	1/270	1
1	BovineHD0100006497	22430817	1	0.18	0.2755	2	0.181	0.5773		1	BovineHD0100006497	1	2	DOM	9/16	126/139	0.3004		1	BovineHD0100006497	1	2	REC	0/25	20/245	0.2351
1	UA-IFASA-9053	22459664	2	0.04	0.1162	1	0.1513	0.3168		1	UA-IFASA-9053	2	1	DOM	2/23	59/212	0.1248		1	UA-IFASA-9053	2	1	REC	0/25	4/267	1
1	BovineHD0100006515	22504689	2	0.14	0.2753	1	0.04319	0.4286		1	BovineHD0100006515	2	1	DOM	7/18	134/133	0.03754		1	BovineHD0100006515	2	1	REC	0/25	13/254	0.612
1	ARS-BFGL-NGS-117957	22525457	1	0.7	0.4797	2	0.003015	2.531		1	ARS-BFGL-NGS-117957	1	2	DOM	23/2	201/70	0.05146		1	ARS-BFGL-NGS-117957	1	2	REC	12/13	59/212	0.006136
1	BTB-00010729	22568717	2	0.02	0.09779	1	0.07274	0.1883		1	BTB-00010729	2	1	DOM	1/24	49/222	0.0927		1	BTB-00010729	2	1	REC	0/25	4/267	1
1	BovineHD0100006555	22591077	1	0.14	0.3502	2	0.002495	0.3021		1	BovineHD0100006555	1	2	DOM	7/18	161/106	0.002539		1	BovineHD0100006555	1	2	REC	0/25	26/241	0.1448
1	BTA-59229-no-rs	22604778	1	0	0.07778	2	0.03982	0		1	BTA-59229-no-rs	1	2	DOM	0/25	39/231	0.05658		1	BTA-59229-no-rs	1	2	REC	0/25	3/267	1
1	BovineHD0100006562	22622795	2	0.36	0.3875	1	0.7628	0.8893		1	BovineHD0100006562	2	1	DOM	13/12	169/102	0.3906		1	BovineHD0100006562	2	1	REC	5/20	41/230	0.5623
1	BovineHD0100006581	22659683	1	0.42	0.3764	2	0.546	1.2		1	BovineHD0100006581	1	2	DOM	17/8	169/102	0.6687		1	BovineHD0100006581	1	2	REC	4/21	35/236	0.7556
1	ARS-BFGL-NGS-118519	22681024	2	0.28	0.3782	1	0.2203	0.6393		1	ARS-BFGL-NGS-118519	2	1	DOM	13/12	172/99	0.2841		1	ARS-BFGL-NGS-118519	2	1	REC	1/24	33/238	0.3312
1	BovineHD0100006599	22777886	2	0	0.04815	1	0.1547	0		1	BovineHD0100006599	2	1	DOM	0/25	26/244	0.1451		1	BovineHD0100006599	2	1	REC	0/25	0/270	1
1	BTA-120720-no-rs	22901046	2	0.5	0.4742	1	0.7684	1.109		1	BTA-120720-no-rs	2	1	DOM	18/7	199/72	0.8179		1	BTA-120720-no-rs	2	1	REC	7/18	58/213	0.4523
1	BTB-00011076	23001427	2	0.46	0.5037	1	0.6578	0.8394		1	BTB-00011076	2	1	DOM	19/6	204/67	1		1	BTB-00011076	2	1	REC	4/21	69/202	0.3436
1	BovineHD0100006669	23080610	2	0.32	0.2528	1	0.3125	1.391		1	BovineHD0100006669	2	1	DOM	14/11	124/147	0.4032		1	BovineHD0100006669	2	1	REC	2/23	13/258	0.3673
1	BTB-02025707	23125028	1	0.48	0.3542	2	0.09109	1.683		1	BTB-02025707	1	2	DOM	17/8	163/108	0.5243		1	BTB-02025707	1	2	REC	7/18	29/242	0.02047
1	BovineHD0100006687	23140537	2	0.1	0.1364	1	0.6625	0.7037		1	BovineHD0100006687	2	1	DOM	5/20	68/196	0.6354		1	BovineHD0100006687	2	1	REC	0/25	4/260	1
1	BTB-01548042	23214124	1	0.32	0.2491	2	0.3085	1.419		1	BTB-01548042	1	2	DOM	13/12	123/148	0.5374		1	BTB-01548042	1	2	REC	3/22	12/259	0.1228
1	BTB-01438016	23317578	1	0.04	0.1511	2	0.03199	0.2341		1	BTB-01438016	1	2	DOM	2/23	75/193	0.03164		1	BTB-01438016	1	2	REC	0/25	6/262	1
1	BovineHD0100006735	23335758	1	0.36	0.3948	2	0.6536	0.8621		1	BovineHD0100006735	1	2	DOM	15/10	175/96	0.6668		1	BovineHD0100006735	1	2	REC	3/22	39/232	1
1	BTB-01562871	23382846	2	0.2	0.2556	1	0.4953	0.7283		1	BTB-01562871	2	1	DOM	9/16	122/148	0.4082		1	BTB-01562871	2	1	REC	1/24	16/254	1
1	BovineHD0100006749	23404797	2	0.04	0.1629	1	0.02145	0.2141		1	BovineHD0100006749	2	1	DOM	2/23	80/187	0.01904		1	BovineHD0100006749	2	1	REC	0/25	7/260	1
1	BovineHD0100006765	23451433	2	0.46	0.4135	1	0.5507	1.208		1	BovineHD0100006765	2	1	DOM	17/8	182/84	1		1	BovineHD0100006765	2	1	REC	6/19	38/228	0.2376
1	ARS-BFGL-NGS-97225	23477787	1	0.32	0.1919	2	0.04176	1.982		1	ARS-BFGL-NGS-97225	1	2	DOM	14/11	96/175	0.05166		1	ARS-BFGL-NGS-97225	1	2	REC	2/23	8/263	0.2029
1	BovineHD0100006803	23554870	1	0.2	0.2838	2	0.2481	0.6308		1	BovineHD0100006803	1	2	DOM	9/16	137/129	0.1492		1	BovineHD0100006803	1	2	REC	1/24	14/252	1
1	ARS-BFGL-NGS-29682	23661806	2	0.4	0.4354	1	0.6575	0.8644		1	ARS-BFGL-NGS-29682	2	1	DOM	13/12	186/85	0.1178		1	ARS-BFGL-NGS-29682	2	1	REC	7/18	50/221	0.2868
1	BTB-01153392	23709011	2	0.22	0.1033	1	0.01915	2.448		1	BTB-01153392	2	1	DOM	10/15	52/219	0.0208		1	BTB-01153392	2	1	REC	1/24	4/267	0.3588
1	BovineHD0100006868	23712951	2	0.3	0.3308	1	0.7535	0.8669		1	BovineHD0100006868	2	1	DOM	10/15	147/119	0.2073		1	BovineHD0100006868	2	1	REC	5/20	29/237	0.1898
1	BTB-01153206	23747154	2	0.28	0.4114	1	0.07223	0.5563		1	BTB-01153206	2	1	DOM	12/13	176/95	0.127		1	BTB-01153206	2	1	REC	2/23	47/224	0.3958
1	BovineHD0100006883	23775870	1	0.24	0.1365	2	0.05794	1.997		1	BovineHD0100006883	1	2	DOM	11/14	68/203	0.0567		1	BovineHD0100006883	1	2	REC	1/24	6/265	0.4644
1	BTB-01153241	23797034	1	0.5	0.4926	2	1	1.03		1	BTB-01153241	1	2	DOM	16/9	198/73	0.3535		1	BTB-01153241	1	2	REC	9/16	69/202	0.2454
1	Hapmap32844-BTA-151959	23863105	1	0.14	0.2749	2	0.04333	0.4294		1	Hapmap32844-BTA-151959	1	2	DOM	6/19	132/139	0.02078		1	Hapmap32844-BTA-151959	1	2	REC	1/24	17/254	1
1	BovineHD0100006928	23904271	2	0	0.05283	1	0.1585	0		1	BovineHD0100006928	2	1	DOM	0/25	28/237	0.1482		1	BovineHD0100006928	2	1	REC	0/25	0/265	1
1	BovineHD0100006929	23905003	2	0	0.05283	1	0.1585	0		1	BovineHD0100006929	2	1	DOM	0/25	28/237	0.1482		1	BovineHD0100006929	2	1	REC	0/25	0/265	1
1	BTB-01885509	23916098	1	0.26	0.3333	2	0.3457	0.7027		1	BTB-01885509	1	2	DOM	10/15	153/117	0.1409		1	BTB-01885509	1	2	REC	3/22	27/243	0.7288
1	BovineHD0100006936	23918911	1	0.4	0.2528	2	0.02944	1.971		1	BovineHD0100006936	1	2	DOM	16/9	123/148	0.09385		1	BovineHD0100006936	1	2	REC	4/21	14/257	0.05387
1	BovineHD0100006920	23943176	2	0.28	0.3278	1	0.5315	0.7976		1	BovineHD0100006920	2	1	DOM	11/14	149/121	0.3014		1	BovineHD0100006920	2	1	REC	3/22	28/242	0.7353
1	BTB-01821892	23946108	2	0.18	0.3081	1	0.07415	0.4929		1	BTB-01821892	2	1	DOM	9/16	145/126	0.09962		1	BTB-01821892	2	1	REC	0/25	22/249	0.2347
1	BovineHD0100006946	23970626	2	0.18	0.2823	1	0.1372	0.5581		1	BovineHD0100006946	2	1	DOM	9/16	134/137	0.2162		1	BovineHD0100006946	2	1	REC	0/25	19/252	0.3855
1	ARS-BFGL-BAC-16283	23977117	1	0.12	0.1896	2	0.2575	0.5829		1	ARS-BFGL-BAC-16283	1	2	DOM	6/19	93/176	0.3776		1	ARS-BFGL-BAC-16283	1	2	REC	0/25	9/260	1
1	BTB-00008466	23998494	2	0.24	0.3414	1	0.1604	0.6091		1	BTB-00008466	2	1	DOM	10/15	151/117	0.1422		1	BTB-00008466	2	1	REC	2/23	32/236	0.7506
1	BovineHD0100006952	24003791	2	0.4	0.4453	1	0.5555	0.8305		1	BovineHD0100006952	2	1	DOM	15/10	182/83	0.3773		1	BovineHD0100006952	2	1	REC	5/20	54/211	1
1	BovineHD0100006959	24044449	1	0.46	0.3284	2	0.06307	1.742		1	BovineHD0100006959	1	2	DOM	18/7	148/123	0.1391		1	BovineHD0100006959	1	2	REC	5/20	30/241	0.1944
1	Hapmap60828-rs29019992	24099198	2	0.12	0.2103	1	0.1443	0.512		1	Hapmap60828-rs29019992	2	1	DOM	6/19	107/164	0.1388		1	Hapmap60828-rs29019992	2	1	REC	0/25	7/264	1
1	ARS-BFGL-NGS-110541	24136861	2	0.38	0.4742	1	0.2366	0.6797		1	ARS-BFGL-NGS-110541	2	1	DOM	17/8	198/73	0.6401		1	ARS-BFGL-NGS-110541	2	1	REC	2/23	59/212	0.1248
1	ARS-BFGL-BAC-6737	24168476	2	0.16	0.2944	1	0.04858	0.4564		1	ARS-BFGL-BAC-6737	2	1	DOM	7/18	136/134	0.03703		1	ARS-BFGL-BAC-6737	2	1	REC	1/24	23/247	0.7055
1	BovineHD0100006989	24193638	2	0.1	0.1556	1	0.408	0.6032		1	BovineHD0100006989	2	1	DOM	5/20	81/189	0.3626		1	BovineHD0100006989	2	1	REC	0/25	3/267	1
1	BTA-49259-no-rs	24222791	2	0.34	0.2085	1	0.04759	1.956		1	BTA-49259-no-rs	2	1	DOM	14/11	104/167	0.09203		1	BTA-49259-no-rs	2	1	REC	3/22	9/262	0.07042
1	BovineHD0100007001	24250187	2	0.3	0.2138	1	0.1581	1.576		1	BovineHD0100007001	2	1	DOM	13/12	105/164	0.2097		1	BovineHD0100007001	2	1	REC	2/23	10/259	0.2713
1	BTA-49269-no-rs	24280702	1	0.28	0.3303	2	0.5305	0.7886		1	BTA-49269-no-rs	1	2	DOM	12/13	152/119	0.5293		1	BTA-49269-no-rs	1	2	REC	2/23	27/244	1
1	BovineHD0100007019	24308441	1	0.16	0.1863	2	0.8486	0.8317		1	BovineHD0100007019	1	2	DOM	7/18	92/179	0.6604		1	BovineHD0100007019	1	2	REC	1/24	9/262	0.5921
1	BovineHD0100007023	24321697	1	0.4	0.3891	2	0.8805	1.047		1	BovineHD0100007023	1	2	DOM	17/8	170/96	0.8281		1	BovineHD0100007023	1	2	REC	3/22	37/229	1
1	BTB-01976950	24356429	2	0.16	0.1199	1	0.3742	1.398		1	BTB-01976950	2	1	DOM	7/18	62/209	0.6212		1	BTB-01976950	2	1	REC	1/24	3/268	0.2987
1	BovineHD0100007038	24374438	2	0.38	0.2892	1	0.1962	1.507		1	BovineHD0100007038	2	1	DOM	16/9	137/131	0.2954		1	BovineHD0100007038	2	1	REC	3/22	18/250	0.4045
1	BovineHD0100007040	24382082	2	0.4	0.3843	1	0.8796	1.068		1	BovineHD0100007040	2	1	DOM	17/8	169/99	0.6712		1	BovineHD0100007040	2	1	REC	3/22	37/231	1
1	BovineHD0100007049	24414918	1	0.48	0.4336	2	0.5535	1.206		1	BovineHD0100007049	1	2	DOM	17/8	185/86	1		1	BovineHD0100007049	1	2	REC	7/18	50/221	0.2868
1	UA-IFASA-5116	24486748	2	0.22	0.1531	1	0.2253	1.56		1	UA-IFASA-5116	2	1	DOM	9/16	80/191	0.5002		1	UA-IFASA-5116	2	1	REC	2/23	3/268	0.05856
1	BTB-00007882	24541288	1	0.34	0.3653	2	0.761	0.895		1	BTB-00007882	1	2	DOM	14/11	158/113	0.835		1	BTB-00007882	1	2	REC	3/22	40/231	1
1	BovineHD0100007103	24562856	1	0.34	0.3123	2	0.7504	1.135		1	BovineHD0100007103	1	2	DOM	15/10	139/130	0.5312		1	BovineHD0100007103	1	2	REC	2/23	29/240	1
1	Hapmap52764-rs29022780	24625263	2	0.34	0.3026	1	0.6308	1.187		1	Hapmap52764-rs29022780	2	1	DOM	14/11	141/130	0.8349		1	Hapmap52764-rs29022780	2	1	REC	3/22	23/248	0.4703
1	BTB-00008090	24677050	2	0.04	0.1407	1	0.04775	0.2544		1	BTB-00008090	2	1	DOM	2/23	71/199	0.051		1	BTB-00008090	2	1	REC	0/25	5/265	1
1	BovineHD0100007162	24715129	2	0.02	0.1716	1	0.002062	0.09853		1	BovineHD0100007162	2	1	DOM	1/24	81/190	0.00407		1	BovineHD0100007162	2	1	REC	0/25	12/259	0.6082
1	BovineHD0100007166	24727812	1	0.1	0.2778	2	0.006447	0.2889		1	BovineHD0100007166	1	2	DOM	5/20	128/142	0.01063		1	BovineHD0100007166	1	2	REC	0/25	22/248	0.2347
1	BTA-49236-no-rs	24736398	2	0.08	0.04797	1	0.3078	1.726		1	BTA-49236-no-rs	2	1	DOM	4/21	26/245	0.2993		1	BTA-49236-no-rs	2	1	REC	0/25	0/271	1
1	BTB-00008277	24758865	1	0.08	0.05597	2	0.5204	1.467		1	BTB-00008277	1	2	DOM	4/21	29/239	0.5029		1	BTB-00008277	1	2	REC	0/25	1/267	1
1	BovineHD0100007185	24765640	1	0.4783	0.4904	2	0.8793	0.9526		1	BovineHD0100007185	1	2	DOM	16/7	194/66	0.6213		1	BovineHD0100007185	1	2	REC	6/17	61/199	0.7992
1	Hapmap52220-rs29016259	24782983	2	0.42	0.3579	1	0.4425	1.299		1	Hapmap52220-rs29016259	2	1	DOM	17/8	161/110	0.523		1	Hapmap52220-rs29016259	2	1	REC	4/21	33/238	0.5325
1	BTA-49243-no-rs	24819532	2	0.42	0.3685	1	0.5412	1.241		1	BTA-49243-no-rs	2	1	DOM	17/8	161/109	0.5231		1	BTA-49243-no-rs	2	1	REC	4/21	38/232	0.7661
1	BTA-15153-rs29026518	24841162	1	0.02	0.03903	2	1	0.5024		1	BTA-15153-rs29026518	1	2	DOM	1/24	21/248	0.7058		1	BTA-15153-rs29026518	1	2	REC	0/25	0/269	1
1	BovineHD0100007225	24901336	1	0.4565	0.483	2	0.7604	0.8991		1	BovineHD0100007225	1	2	DOM	18/5	196/69	0.8056		1	BovineHD0100007225	1	2	REC	3/20	60/205	0.4302
1	BovineHD0100007238	24964189	1	0.02174	0.1546	2	0.008173	0.1215		1	BovineHD0100007238	1	2	DOM	1/22	76/186	0.007049		1	BovineHD0100007238	1	2	REC	0/23	5/257	1
1	BTB-00014074	24984897	1	0.48	0.4889	2	1	0.9649		1	BTB-00014074	1	2	DOM	19/6	203/68	1		1	BTB-00014074	1	2	REC	5/20	62/209	1
1	ARS-BFGL-BAC-11218	25027851	1	0.28	0.2556	2	0.7358	1.133		1	ARS-BFGL-BAC-11218	1	2	DOM	12/13	118/152	0.6803		1	ARS-BFGL-BAC-11218	1	2	REC	2/23	20/250	1
1	BovineHD0100007277	25086040	1	0.3261	0.3365	2	1	0.9542		1	BovineHD0100007277	1	2	DOM	13/10	151/115	1		1	BovineHD0100007277	1	2	REC	2/21	28/238	1
1	ARS-BFGL-NGS-19076	25126982	1	0.4	0.487	2	0.3004	0.7022		1	ARS-BFGL-NGS-19076	1	2	DOM	18/7	199/71	0.8162		1	ARS-BFGL-NGS-19076	1	2	REC	2/23	64/206	0.08132
1	BovineHD0100007296	25144847	2	0.02174	0.211	1	0.0007009	0.08308		1	BovineHD0100007296	2	1	DOM	1/22	97/166	0.00092		1	BovineHD0100007296	2	1	REC	0/23	14/249	0.613
1	chr1_24670381	25147117	1	0.1	0.132	2	0.6614	0.7308		1	chr1_24670381	1	2	DOM	5/20	64/205	0.8079		1	chr1_24670381	1	2	REC	0/25	7/262	1
1	BovineHD0100007305	25161217	1	0.2826	0.3096	2	0.8677	0.8784		1	BovineHD0100007305	1	2	DOM	12/11	133/127	1		1	BovineHD0100007305	1	2	REC	1/22	28/232	0.4871
1	BTB-00010532	25169655	1	0.26	0.2778	2	0.8697	0.9135		1	BTB-00010532	1	2	DOM	12/13	131/139	1		1	BTB-00010532	1	2	REC	1/24	19/251	1
1	BovineHD0100007320	25216165	1	0.2174	0.2643	2	0.6	0.7734		1	BovineHD0100007320	1	2	DOM	9/14	123/140	0.5204		1	BovineHD0100007320	1	2	REC	1/22	16/247	1
1	BovineHD4100000146	25262463	2	0	0.02863	1	0.6233	0		1	BovineHD4100000146	2	1	DOM	0/23	14/248	0.6132		1	BovineHD4100000146	2	1	REC	0/23	1/261	1
1	Hapmap39274-BTA-49324	25283617	1	0.06	0.262	2	0.0008503	0.1798		1	Hapmap39274-BTA-49324	1	2	DOM	3/22	123/148	0.001135		1	Hapmap39274-BTA-49324	1	2	REC	0/25	19/252	0.3855
1	ARS-BFGL-NGS-115371	25316771	1	0.06	0.2952	2	0.0001084	0.1524		1	ARS-BFGL-NGS-115371	1	2	DOM	3/22	138/133	0.0002162		1	ARS-BFGL-NGS-115371	1	2	REC	0/25	22/249	0.2347
1	BTB-00010021	25360826	1	0	0.1328	2	0.002314	0		1	BTB-00010021	1	2	DOM	0/25	69/202	0.001982		1	BTB-00010021	1	2	REC	0/25	3/268	1
1	BTA-49319-no-rs	25400262	1	0.24	0.25	2	1	0.9474		1	BTA-49319-no-rs	1	2	DOM	10/15	116/154	0.8352		1	BTA-49319-no-rs	1	2	REC	2/23	19/251	0.6949
1	BovineHD0100007402	25480755	2	0.3696	0.5115	1	0.08981	0.56		1	BovineHD0100007402	2	1	DOM	14/9	197/65	0.1417		1	BovineHD0100007402	2	1	REC	3/20	71/191	0.2132
1	Hapmap53715-rs29017639	25482611	2	0.2	0.1889	1	0.8509	1.074		1	Hapmap53715-rs29017639	2	1	DOM	9/16	90/180	0.8262		1	Hapmap53715-rs29017639	2	1	REC	1/24	12/258	1
1	BovineHD0100007407	25495578	1	0.6304	0.4846	2	0.06537	1.814		1	BovineHD0100007407	1	2	DOM	20/3	189/71	0.2136		1	BovineHD0100007407	1	2	REC	9/14	63/197	0.1347
1	BTB-00009762	25511500	1	0.06	0.1384	2	0.1306	0.3974		1	BTB-00009762	1	2	DOM	3/22	67/204	0.2181		1	BTB-00009762	1	2	REC	0/25	8/263	1
1	ARS-BFGL-NGS-82685	25550567	2	0.36	0.2251	1	0.03728	1.936		1	ARS-BFGL-NGS-82685	2	1	DOM	16/9	110/161	0.03314		1	ARS-BFGL-NGS-82685	2	1	REC	2/23	12/259	0.3347
1	BovineHD0100007439	25595556	1	0.2609	0.5	2	0.001927	0.3529		1	BovineHD0100007439	1	2	DOM	11/12	200/64	0.006159		1	BovineHD0100007439	1	2	REC	1/22	64/200	0.03447
1	BovineHD0100007449	25626372	1	0.54	0.4815	2	0.4619	1.264		1	BovineHD0100007449	1	2	DOM	19/6	200/70	1		1	BovineHD0100007449	1	2	REC	8/17	60/210	0.3193
1	BTA-49289-no-rs	25651580	1	0.26	0.3542	2	0.2147	0.6405		1	BTA-49289-no-rs	1	2	DOM	11/14	157/114	0.208		1	BTA-49289-no-rs	1	2	REC	2/23	35/236	0.7517
1	BovineHD0100007477	25714088	1	0.1087	0.09811	2	0.7966	1.121		1	BovineHD0100007477	1	2	DOM	5/18	50/215	0.7821		1	BovineHD0100007477	1	2	REC	0/23	2/263	1
1	BovineHD0100046406	25745106	1	0.3478	0.5056	2	0.04574	0.5214		1	BovineHD0100046406	1	2	DOM	14/9	203/63	0.1294		1	BovineHD0100046406	1	2	REC	2/21	66/200	0.121
1	ARS-BFGL-BAC-13086	25786913	2	0.3	0.4096	1	0.174	0.6178		1	ARS-BFGL-BAC-13086	2	1	DOM	13/12	176/95	0.2004		1	ARS-BFGL-BAC-13086	2	1	REC	2/23	46/225	0.3934
1	ARS-BFGL-NGS-34568	25819185	1	0.08	0.08672	2	1	0.9158		1	ARS-BFGL-NGS-34568	1	2	DOM	4/21	46/225	1		1	ARS-BFGL-NGS-34568	1	2	REC	0/25	1/270	1
1	BovineHD0100007517	25881846	1	0.1	0.08922	2	0.7955	1.134		1	BovineHD0100007517	1	2	DOM	5/20	47/222	0.7841		1	BovineHD0100007517	1	2	REC	0/25	1/268	1
1	BovineHD0100007518	25888342	1	0.1957	0.3467	2	0.04922	0.4583		1	BovineHD0100007518	1	2	DOM	9/14	150/111	0.124		1	BovineHD0100007518	1	2	REC	0/23	31/230	0.1519
1	BTA-49283-no-rs	25923897	1	0.04	0.1444	2	0.04869	0.2468		1	BTA-49283-no-rs	1	2	DOM	2/23	73/197	0.05156		1	BTA-49283-no-rs	1	2	REC	0/25	5/265	1
1	BovineHD0100007535	25987030	1	0.34	0.3922	2	0.5449	0.7984		1	BovineHD0100007535	1	2	DOM	14/11	166/103	0.6688		1	BovineHD0100007535	1	2	REC	3/22	45/224	0.7777
1	ARS-BFGL-NGS-16145	26001083	2	0.1875	0.1907	1	1	0.9791		1	ARS-BFGL-NGS-16145	2	1	DOM	8/16	93/177	1		1	ARS-BFGL-NGS-16145	2	1	REC	1/23	10/260	1
1	BovineHD0100007541	26026329	1	0.1739	0.3377	2	0.02191	0.4128		1	BovineHD0100007541	1	2	DOM	8/15	147/118	0.07962		1	BovineHD0100007541	1	2	REC	0/23	32/233	0.08893
1	BTB-00009232	26105452	1	0.06	0.1052	2	0.4613	0.5431		1	BTB-00009232	1	2	DOM	3/22	54/217	0.4342		1	BTB-00009232	1	2	REC	0/25	3/268	1
1	BovineHD0100007558	26124425	1	0.6087	0.4886	2	0.1265	1.628		1	BovineHD0100007558	1	2	DOM	20/3	193/70	0.2128		1	BovineHD0100007558	1	2	REC	8/15	64/199	0.3157
1	ARS-BFGL-NGS-20807	26144886	2	0.4	0.3926	1	1	1.031		1	ARS-BFGL-NGS-20807	2	1	DOM	18/7	172/98	0.5146		1	ARS-BFGL-NGS-20807	2	1	REC	2/23	40/230	0.5498
1	BovineHD0100007577	26169638	2	0.1	0.3086	1	0.001061	0.249		1	BovineHD0100007577	2	1	DOM	5/20	139/130	0.002872		1	BovineHD0100007577	2	1	REC	0/25	27/242	0.1454
1	Hapmap26753-BTA-158146	26287535	2	0.22	0.303	1	0.2585	0.6489		1	Hapmap26753-BTA-158146	2	1	DOM	9/16	133/136	0.2162		1	Hapmap26753-BTA-158146	2	1	REC	2/23	30/239	1
1	BovineHD0100007610	26300728	2	0.5217	0.3636	1	0.03926	1.909		1	BovineHD0100007610	2	1	DOM	18/5	163/101	0.1751		1	BovineHD0100007610	2	1	REC	6/17	29/235	0.04563
1	BovineHD0100007618	26336990	2	0.3043	0.2462	1	0.3789	1.339		1	BovineHD0100007618	2	1	DOM	12/11	115/149	0.5129		1	BovineHD0100007618	2	1	REC	2/21	15/249	0.635
1	BovineHD0100007641	26411261	2	0.4792	0.3843	1	0.2182	1.474		1	BovineHD0100007641	2	1	DOM	18/6	168/100	0.2733		1	BovineHD0100007641	2	1	REC	5/19	38/230	0.3701
1	BovineHD0100007647	26431102	2	0.38	0.2472	1	0.04416	1.866		1	BovineHD0100007647	2	1	DOM	18/7	117/152	0.01051		1	BovineHD0100007647	2	1	REC	1/24	16/253	1
1	BovineHD0100007649	26436860	2	0.14	0.223	1	0.2097	0.5671		1	BovineHD0100007649	2	1	DOM	7/18	107/162	0.2888		1	BovineHD0100007649	2	1	REC	0/25	13/256	0.6117
1	BovineHD0100007652	26452516	2	0.4783	0.3233	1	0.04953	1.919		1	BovineHD0100007652	2	1	DOM	18/5	146/120	0.04625		1	BovineHD0100007652	2	1	REC	4/19	26/240	0.2769
1	BovineHD0100007665	26505838	2	0.22	0.3401	1	0.1148	0.5471		1	BovineHD0100007665	2	1	DOM	11/14	158/111	0.2041		1	BovineHD0100007665	2	1	REC	0/25	25/244	0.1461
1	BovineHD0100007673	26521636	1	0.413	0.4943	2	0.3564	0.7199		1	BovineHD0100007673	1	2	DOM	15/8	200/64	0.3148		1	BovineHD0100007673	1	2	REC	4/19	61/203	0.7949
1	ARS-BFGL-NGS-50954	26559426	1	0.22	0.2565	2	0.734	0.8177		1	ARS-BFGL-NGS-50954	1	2	DOM	9/16	117/154	0.5328		1	ARS-BFGL-NGS-50954	1	2	REC	2/23	22/249	1
1	BovineHD0100007713	26609580	2	0.2826	0.3989	1	0.1553	0.5937		1	BovineHD0100007713	2	1	DOM	12/11	164/98	0.3732		1	BovineHD0100007713	2	1	REC	1/22	45/217	0.1424
1	BovineHD0100007728	26635591	2	0.3913	0.3264	1	0.4148	1.327		1	BovineHD0100007728	2	1	DOM	14/9	145/120	0.6645		1	BovineHD0100007728	2	1	REC	4/19	28/237	0.3021
1	BovineHD0100007746	26681454	2	0.02	0.07836	1	0.162	0.24		1	BovineHD0100007746	2	1	DOM	1/24	40/228	0.2232		1	BovineHD0100007746	2	1	REC	0/25	2/266	1
1	BovineHD0100007786	26776298	1	0.02	0.08178	2	0.1623	0.2291		1	BovineHD0100007786	1	2	DOM	1/24	43/226	0.1444		1	BovineHD0100007786	1	2	REC	0/25	1/268	1
1	Hapmap50927-BTA-28806	26803778	1	0	0.08303	2	0.02485	0		1	Hapmap50927-BTA-28806	1	2	DOM	0/25	44/227	0.03388		1	Hapmap50927-BTA-28806	1	2	REC	0/25	1/270	1
1	BovineHD0100007805	26837703	1	0.4783	0.3282	2	0.05066	1.876		1	BovineHD0100007805	1	2	DOM	18/5	145/117	0.04621		1	BovineHD0100007805	1	2	REC	4/19	27/235	0.2934
1	BovineHD0100007806	26839277	1	0.1304	0.05894	2	0.1068	2.395		1	BovineHD0100007806	1	2	DOM	5/18	31/232	0.1858		1	BovineHD0100007806	1	2	REC	1/22	0/263	0.08042
1	BovineHD0100007822	26880560	2	0.1	0.1338	1	0.6617	0.7191		1	BovineHD0100007822	2	1	DOM	4/21	69/200	0.3424		1	BovineHD0100007822	2	1	REC	1/24	3/266	0.3005
1	BovineHD0100007825	26884051	1	0.0625	0.1362	2	0.1812	0.4228		1	BovineHD0100007825	1	2	DOM	3/21	71/197	0.1496		1	BovineHD0100007825	1	2	REC	0/24	2/266	1
1	Hapmap59621-rs29013246	26889213	1	0.1	0.06089	2	0.3577	1.714		1	Hapmap59621-rs29013246	1	2	DOM	4/21	33/238	0.5325		1	Hapmap59621-rs29013246	1	2	REC	1/24	0/271	0.08446
1	ARS-BFGL-NGS-11151	26921328	1	0.64	0.4317	2	0.006962	2.34		1	ARS-BFGL-NGS-11151	1	2	DOM	23/2	182/89	0.01106		1	ARS-BFGL-NGS-11151	1	2	REC	9/16	52/219	0.06688
1	BovineHD0100007863	26968734	2	0.38	0.2398	1	0.03966	1.943		1	BovineHD0100007863	2	1	DOM	18/7	114/155	0.005692		1	BovineHD0100007863	2	1	REC	1/24	15/254	1
1	BovineHD0100007871	26982720	1	0	0.02974	2	0.3842	0		1	BovineHD0100007871	1	2	DOM	0/25	16/253	0.3769		1	BovineHD0100007871	1	2	REC	0/25	0/269	1
1	BovineHD0100007887	27032054	1	0.06	0.04259	2	0.4761	1.435		1	BovineHD0100007887	1	2	DOM	3/22	23/247	0.4716		1	BovineHD0100007887	1	2	REC	0/25	0/270	1
1	ARS-BFGL-BAC-13744	27106390	2	0.04	0.05762	1	1	0.6815		1	ARS-BFGL-BAC-13744	2	1	DOM	2/23	30/239	1		1	ARS-BFGL-BAC-13744	2	1	REC	0/25	1/268	1
1	BovineHD0100007915	27118086	2	0.125	0.1393	1	1	0.8826		1	BovineHD0100007915	2	1	DOM	6/18	69/193	1		1	BovineHD0100007915	2	1	REC	0/24	4/258	1
1	ARS-BFGL-BAC-5834	27171038	1	0.06	0.1236	2	0.2519	0.4525		1	ARS-BFGL-BAC-5834	1	2	DOM	3/22	64/207	0.2205		1	ARS-BFGL-BAC-5834	1	2	REC	0/25	3/268	1
1	Hapmap51561-BTA-120459	27239572	1	0.44	0.3782	2	0.4476	1.292		1	Hapmap51561-BTA-120459	1	2	DOM	17/8	169/102	0.6687		1	Hapmap51561-BTA-120459	1	2	REC	5/20	36/235	0.3632
1	BovineHD0100007956	27267066	2	0.38	0.487	1	0.1827	0.6457		1	BovineHD0100007956	2	1	DOM	17/8	203/66	0.4698		1	BovineHD0100007956	2	1	REC	2/23	59/210	0.1242
1	BovineHD0100007959	27294161	2	0.12	0.07993	1	0.2916	1.57		1	BovineHD0100007959	2	1	DOM	6/19	41/228	0.2566		1	BovineHD0100007959	2	1	REC	0/25	2/267	1
1	BovineHD0100007973	27322794	2	0.38	0.4888	1	0.1825	0.6409		1	BovineHD0100007973	2	1	DOM	17/8	203/66	0.4698		1	BovineHD0100007973	2	1	REC	2/23	60/209	0.1237
1	BovineHD0100007992	27357800	1	0.34	0.2862	2	0.4194	1.285		1	BovineHD0100007992	1	2	DOM	14/11	132/137	0.5372		1	BovineHD0100007992	1	2	REC	3/22	22/247	0.4571
1	BovineHD0100007997	27369765	1	0.24	0.2727	2	0.7394	0.8421		1	BovineHD0100007997	1	2	DOM	10/15	130/134	0.4093		1	BovineHD0100007997	1	2	REC	2/23	14/250	0.6374
1	BTA-108804-no-rs	27491647	1	0.28	0.4077	2	0.09606	0.5649		1	BTA-108804-no-rs	1	2	DOM	12/13	176/95	0.127		1	BTA-108804-no-rs	1	2	REC	2/23	45/226	0.392
1	Hapmap42876-BTA-23541	27602693	1	0.44	0.4465	2	1	0.974		1	Hapmap42876-BTA-23541	1	2	DOM	17/8	185/86	1		1	Hapmap42876-BTA-23541	1	2	REC	5/20	57/214	1
1	BovineHD0100008084	27634159	1	0.06	0.07993	2	0.7872	0.7348		1	BovineHD0100008084	1	2	DOM	3/22	41/228	1		1	BovineHD0100008084	1	2	REC	0/25	2/267	1
1	BTB-00011225	27706076	2	0.28	0.2657	1	0.8675	1.075		1	BTB-00011225	2	1	DOM	12/13	126/145	1		1	BTB-00011225	2	1	REC	2/23	18/253	0.6807
1	BovineHD0100008157	27829763	2	0.3125	0.2319	1	0.2176	1.505		1	BovineHD0100008157	2	1	DOM	12/12	110/153	0.5191		1	BovineHD0100008157	2	1	REC	3/21	12/251	0.1198
1	Hapmap50048-BTA-59263	27922359	1	0.36	0.3339	2	0.7549	1.122		1	Hapmap50048-BTA-59263	1	2	DOM	16/9	155/116	0.5352		1	Hapmap50048-BTA-59263	1	2	REC	2/23	26/245	1
1	BovineHD0100008201	27988236	2	0.18	0.3011	1	0.07503	0.5095		1	BovineHD0100008201	2	1	DOM	9/16	140/129	0.1458		1	BovineHD0100008201	2	1	REC	0/25	22/247	0.2348
1	BovineHD0100008210	28027702	2	0.52	0.4331	1	0.2384	1.418		1	BovineHD0100008210	2	1	DOM	18/7	185/84	0.8244		1	BovineHD0100008210	2	1	REC	8/17	48/221	0.1073
1	BovineHD0100008220	28064356	1	0.08	0.1636	2	0.1536	0.4447		1	BovineHD0100008220	1	2	DOM	4/21	75/194	0.2442		1	BovineHD0100008220	1	2	REC	0/25	13/256	0.6117
1	BovineHD0100008239	28153747	1	0.06	0.1877	2	0.01994	0.2762		1	BovineHD0100008239	1	2	DOM	3/22	96/173	0.01519		1	BovineHD0100008239	1	2	REC	0/25	5/264	1
1	BovineHD0100008245	28181841	1	0.36	0.3704	2	1	0.9562		1	BovineHD0100008245	1	2	DOM	16/9	172/98	1		1	BovineHD0100008245	1	2	REC	2/23	28/242	1
1	BTB-01285304	28217099	2	0.02	0.19	1	0.000772	0.08698		1	BTB-01285304	2	1	DOM	1/24	92/179	0.001149		1	BTB-01285304	2	1	REC	0/25	11/260	0.6078
1	BTB-01285382	28243053	2	0.04	0.06273	1	0.7588	0.6225		1	BTB-01285382	2	1	DOM	2/23	32/239	0.751		1	BTB-01285382	2	1	REC	0/25	2/269	1
1	BTB-01285492	28272873	2	0.04	0.1218	1	0.103	0.3005		1	BTB-01285492	2	1	DOM	2/23	58/213	0.1262		1	BTB-01285492	2	1	REC	0/25	8/263	1
1	BovineHD0100008286	28320522	1	0.5	0.4262	2	0.371	1.346		1	BovineHD0100008286	1	2	DOM	20/5	185/86	0.2643		1	BovineHD0100008286	1	2	REC	5/20	46/225	0.7812
1	BovineHD0100008303	28378968	2	0.14	0.2007	1	0.3554	0.6481		1	BovineHD0100008303	2	1	DOM	7/18	95/174	0.5179		1	BovineHD0100008303	2	1	REC	0/25	13/256	0.6117
1	BovineHD0100008315	28408061	1	0.44	0.2993	2	0.05416	1.84		1	BovineHD0100008315	1	2	DOM	19/6	140/129	0.02223		1	BovineHD0100008315	1	2	REC	3/22	21/248	0.4421
1	BTB-01285832	28434475	1	0.22	0.2528	2	0.7334	0.8338		1	BTB-01285832	1	2	DOM	9/16	121/150	0.5284		1	BTB-01285832	1	2	REC	2/23	16/255	0.6557
1	BTB-01285855	28489054	2	0.3	0.1859	1	0.06182	1.877		1	BTB-01285855	2	1	DOM	14/11	93/176	0.04864		1	BTB-01285855	2	1	REC	1/24	7/262	0.5132
1	Hapmap59457-rs29010971	28529358	2	0.44	0.3745	1	0.3651	1.312		1	Hapmap59457-rs29010971	2	1	DOM	17/8	165/106	0.5277		1	Hapmap59457-rs29010971	2	1	REC	5/20	38/233	0.3823
1	BTB-01285931	28566525	1	0.26	0.2897	2	0.7453	0.8616		1	BTB-01285931	1	2	DOM	11/14	134/137	0.6784		1	BTB-01285931	1	2	REC	2/23	23/248	1
1	BTB-01334157	28612680	1	0.44	0.4594	2	0.8824	0.9246		1	BTB-01334157	1	2	DOM	19/6	192/79	0.6524		1	BTB-01334157	1	2	REC	3/22	57/214	0.4346
1	BovineHD0100008371	28628277	1	0.18	0.2727	2	0.1813	0.5854		1	BovineHD0100008371	1	2	DOM	9/16	127/137	0.2972		1	BovineHD0100008371	1	2	REC	0/25	17/247	0.3777
1	BovineHD0100008372	28638172	1	0.18	0.2251	2	0.5934	0.7557		1	BovineHD0100008372	1	2	DOM	9/16	109/162	0.8316		1	BovineHD0100008372	1	2	REC	0/25	13/258	0.6114
1	BovineHD0100008394	28741233	1	0.16	0.2122	2	0.4683	0.7072		1	BovineHD0100008394	1	2	DOM	8/17	104/167	0.6676		1	BovineHD0100008394	1	2	REC	0/25	11/260	0.6078
1	BovineHD0100008409	28792375	2	0.3	0.3395	1	0.6407	0.8339		1	BovineHD0100008409	2	1	DOM	11/14	152/119	0.2951		1	BovineHD0100008409	2	1	REC	4/21	32/239	0.5232
1	ARS-BFGL-BAC-15042	28839476	1	0.3	0.2657	2	0.6181	1.185		1	ARS-BFGL-BAC-15042	1	2	DOM	14/11	128/143	0.4125		1	ARS-BFGL-BAC-15042	1	2	REC	1/24	16/255	1
1	BovineHD0100008426	28852017	2	0.52	0.4723	1	0.5559	1.21		1	BovineHD0100008426	2	1	DOM	21/4	200/71	0.3404		1	BovineHD0100008426	2	1	REC	5/20	56/215	1
1	BovineHD0100008438	28894165	1	0.2708	0.3034	2	0.7433	0.8529		1	BovineHD0100008438	1	2	DOM	12/12	138/129	1		1	BovineHD0100008438	1	2	REC	1/23	24/243	0.7057
1	BovineHD0100008449	28939657	1	0.18	0.1587	2	0.6879	1.164		1	BovineHD0100008449	1	2	DOM	9/16	81/190	0.5047		1	BovineHD0100008449	1	2	REC	0/25	5/266	1
1	BTB-00012150	29021209	2	0.52	0.4723	1	0.5559	1.21		1	BTB-00012150	2	1	DOM	21/4	192/79	0.2433		1	BTB-00012150	2	1	REC	5/20	64/207	0.8082
1	BovineHD0100008468	29027310	2	0.06	0.1722	1	0.04363	0.3068		1	BovineHD0100008468	2	1	DOM	3/22	79/191	0.09955		1	BovineHD0100008468	2	1	REC	0/25	14/256	0.6173
1	BTB-00012128	29047612	2	0.46	0.428	1	0.658	1.138		1	BTB-00012128	2	1	DOM	19/6	182/89	0.5024		1	BTB-00012128	2	1	REC	4/21	50/221	1
1	ARS-BFGL-BAC-14387	29071379	1	0.42	0.4779	2	0.4622	0.7912		1	ARS-BFGL-BAC-14387	1	2	DOM	18/7	192/79	1		1	ARS-BFGL-BAC-14387	1	2	REC	3/22	67/204	0.2181
1	ARS-BFGL-NGS-20624	29124102	1	0.04	0.1107	2	0.1484	0.3347		1	ARS-BFGL-NGS-20624	1	2	DOM	2/23	56/215	0.1864		1	ARS-BFGL-NGS-20624	1	2	REC	0/25	4/267	1
1	BovineHD0100008522	29147074	1	0.22	0.184	2	0.5691	1.251		1	BovineHD0100008522	1	2	DOM	11/14	92/177	0.3818		1	BovineHD0100008522	1	2	REC	0/25	7/262	1
1	BTB-00011831	29217927	2	0.44	0.3911	1	0.5464	1.223		1	BTB-00011831	2	1	DOM	20/5	168/103	0.0845		1	BTB-00011831	2	1	REC	2/23	44/227	0.3918
1	BTB-00012396	29239316	2	0.54	0.4201	1	0.1347	1.621		1	BTB-00012396	2	1	DOM	21/4	175/94	0.07433		1	BTB-00012396	2	1	REC	6/19	51/218	0.5962
1	BovineHD0100008555	29249975	1	0.06	0.1347	2	0.1827	0.4101		1	BovineHD0100008555	1	2	DOM	3/22	67/204	0.2181		1	BovineHD0100008555	1	2	REC	0/25	6/265	1
1	ARS-BFGL-BAC-15059	29316022	1	0.14	0.2159	2	0.2753	0.5913		1	ARS-BFGL-BAC-15059	1	2	DOM	6/19	105/166	0.1953		1	ARS-BFGL-BAC-15059	1	2	REC	1/24	12/259	1
1	ARS-BFGL-NGS-119690	29353509	1	0.52	0.4096	2	0.1366	1.562		1	ARS-BFGL-NGS-119690	1	2	DOM	20/5	174/97	0.128		1	ARS-BFGL-NGS-119690	1	2	REC	6/19	48/223	0.4222
1	ARS-BFGL-BAC-15061	29386594	2	0.52	0.3963	1	0.09867	1.65		1	ARS-BFGL-BAC-15061	2	1	DOM	20/5	173/97	0.1274		1	ARS-BFGL-BAC-15061	2	1	REC	6/19	41/229	0.2553
1	BTA-59279-no-rs	29411641	2	0.1	0.1144	1	1	0.8602		1	BTA-59279-no-rs	2	1	DOM	5/20	58/213	1		1	BTA-59279-no-rs	2	1	REC	0/25	4/267	1
1	BTB-00012425	29424487	2	0.18	0.1919	1	1	0.9245		1	BTB-00012425	2	1	DOM	9/16	95/176	1		1	BTB-00012425	2	1	REC	0/25	9/262	1
1	BTB-00012448	29451206	1	0.18	0.2214	2	0.5932	0.772		1	BTB-00012448	1	2	DOM	8/17	108/163	0.5243		1	BTB-00012448	1	2	REC	1/24	12/259	1
1	BTB-01734642	29520198	2	0.24	0.31	1	0.3389	0.703		1	BTB-01734642	2	1	DOM	10/15	146/125	0.2124		1	BTB-01734642	2	1	REC	2/23	22/249	1
1	ARS-BFGL-NGS-108911	29541996	1	0.38	0.3155	2	0.3466	1.33		1	ARS-BFGL-NGS-108911	1	2	DOM	17/8	147/124	0.212		1	ARS-BFGL-NGS-108911	1	2	REC	2/23	24/247	1
1	ARS-BFGL-NGS-100058	29576850	1	0.44	0.4	2	0.6517	1.179		1	ARS-BFGL-NGS-100058	1	2	DOM	19/6	177/93	0.3778		1	ARS-BFGL-NGS-100058	1	2	REC	3/22	39/231	1
1	BTB-00012560	29641444	1	0.1	0.08487	2	0.6069	1.198		1	BTB-00012560	1	2	DOM	5/20	44/227	0.5804		1	BTB-00012560	1	2	REC	0/25	2/269	1
1	Hapmap40010-BTA-59286	29687411	2	0.54	0.476	1	0.46	1.292		1	Hapmap40010-BTA-59286	2	1	DOM	20/5	198/73	0.6354		1	Hapmap40010-BTA-59286	2	1	REC	7/18	60/211	0.4645
1	BovineHD0100008662	29712048	1	0.1	0.1519	2	0.4073	0.6206		1	BovineHD0100008662	1	2	DOM	4/21	79/191	0.2436		1	BovineHD0100008662	1	2	REC	1/24	3/267	0.2996
1	BTB-00012627	29718126	1	0.48	0.4296	2	0.5515	1.225		1	BTB-00012627	1	2	DOM	20/5	181/89	0.2616		1	BTB-00012627	1	2	REC	4/21	51/219	1
1	ARS-BFGL-BAC-11193	29747969	1	0.42	0.4631	2	0.6568	0.8395		1	ARS-BFGL-BAC-11193	1	2	DOM	17/8	194/77	0.8175		1	ARS-BFGL-BAC-11193	1	2	REC	4/21	57/214	0.796
1	BovineHD0100008680	29773499	1	0.56	0.4889	2	0.3765	1.331		1	BovineHD0100008680	1	2	DOM	21/4	202/68	0.4648		1	BovineHD0100008680	1	2	REC	7/18	62/208	0.6217
1	BovineHD0100008695	29835507	2	0.56	0.4852	1	0.3754	1.35		1	BovineHD0100008695	2	1	DOM	21/4	202/69	0.3436		1	BovineHD0100008695	2	1	REC	7/18	61/210	0.6188
1	ARS-BFGL-NGS-24142	29859693	2	0.08	0.1033	1	0.807	0.7547		1	ARS-BFGL-NGS-24142	2	1	DOM	3/22	56/215	0.4336		1	ARS-BFGL-NGS-24142	2	1	REC	1/24	0/271	0.08446
1	BovineHD0100008702	29875513	2	0.4167	0.4755	1	0.4544	0.788		1	BovineHD0100008702	2	1	DOM	16/8	192/73	0.6352		1	BovineHD0100008702	2	1	REC	4/20	60/205	0.6145
1	BovineHD0100008719	29915443	2	0.08	0.1506	1	0.2108	0.4906		1	BovineHD0100008719	2	1	DOM	4/21	76/193	0.243		1	BovineHD0100008719	2	1	REC	0/25	5/264	1
1	BovineHD0100008729	29938999	1	0.42	0.4519	2	0.7667	0.8785		1	BovineHD0100008729	1	2	DOM	17/8	188/82	0.8245		1	BovineHD0100008729	1	2	REC	4/21	56/214	0.7955
1	ARS-BFGL-NGS-114084	29944908	2	0.08	0.1605	1	0.1539	0.4548		1	ARS-BFGL-NGS-114084	2	1	DOM	4/21	80/191	0.1721		1	ARS-BFGL-NGS-114084	2	1	REC	0/25	7/264	1
1	ARS-USMARC-Parent-DQ451555-rs29010795	29963400	1	0.56	0.4834	2	0.3057	1.36		1	ARS-USMARC-Parent-DQ451555-rs29010795	1	2	DOM	21/4	201/70	0.3416		1	ARS-USMARC-Parent-DQ451555-rs29010795	1	2	REC	7/18	61/210	0.6188
1	BovineHD0100008739	29980510	1	0.48	0.4026	2	0.296	1.37		1	BovineHD0100008739	1	2	DOM	19/6	170/97	0.2761		1	BovineHD0100008739	1	2	REC	5/20	45/222	0.7805
1	BovineHD0100008741	29984913	1	0.12	0.1338	2	1	0.8826		1	BovineHD0100008741	1	2	DOM	6/19	68/201	1		1	BovineHD0100008741	1	2	REC	0/25	4/265	1
1	BovineHD0100008745	30003117	1	0.46	0.3783	2	0.2882	1.4		1	BovineHD0100008745	1	2	DOM	18/7	161/106	0.2891		1	BovineHD0100008745	1	2	REC	5/20	41/226	0.5654
1	BovineHD0100008746	30006137	2	0.54	0.4926	1	0.5566	1.209		1	BovineHD0100008746	2	1	DOM	20/5	201/70	0.6356		1	BovineHD0100008746	2	1	REC	7/18	66/205	0.636
1	BovineHD0100008748	30011802	1	0.48	0.3858	2	0.226	1.47		1	BovineHD0100008748	1	2	DOM	19/6	164/103	0.1953		1	BovineHD0100008748	1	2	REC	5/20	42/225	0.5712
1	BovineHD0100008749	30018380	1	0.36	0.2889	2	0.3307	1.385		1	BovineHD0100008749	1	2	DOM	16/9	136/134	0.2148		1	BovineHD0100008749	1	2	REC	2/23	20/250	1
1	ARS-BFGL-NGS-40513	30092167	1	0.34	0.3672	2	0.7605	0.8879		1	ARS-BFGL-NGS-40513	1	2	DOM	14/11	159/112	0.8339		1	ARS-BFGL-NGS-40513	1	2	REC	3/22	40/231	1
1	BovineHD0100008775	30113163	1	0.12	0.1328	2	1	0.8902		1	BovineHD0100008775	1	2	DOM	5/20	67/204	0.8079		1	BovineHD0100008775	1	2	REC	1/24	5/266	0.4139
1	BovineHD0100008800	30232831	2	0.46	0.4015	1	0.4533	1.27		1	BovineHD0100008800	2	1	DOM	20/5	171/98	0.1257		1	BovineHD0100008800	2	1	REC	3/22	45/224	0.7777
1	BTA-59299-no-rs	30241742	1	0.18	0.2565	2	0.3054	0.6364		1	BTA-59299-no-rs	1	2	DOM	9/16	122/149	0.4096		1	BTA-59299-no-rs	1	2	REC	0/25	17/254	0.3773
1	BTA-59305-no-rs	30323359	2	0.1	0.1171	1	1	0.8377		1	BTA-59305-no-rs	2	1	DOM	5/20	59/210	1		1	BTA-59305-no-rs	2	1	REC	0/25	4/265	1
1	BovineHD0100008840	30392152	2	0.1	0.1852	1	0.1749	0.4889		1	BovineHD0100008840	2	1	DOM	5/20	90/180	0.2623		1	BovineHD0100008840	2	1	REC	0/25	10/260	1
1	ARS-BFGL-BAC-7369	30418294	2	0	0.02399	1	0.6153	0		1	ARS-BFGL-BAC-7369	2	1	DOM	0/25	12/259	0.6082		1	ARS-BFGL-BAC-7369	2	1	REC	0/25	1/270	1
1	ARS-BFGL-NGS-14285	30449967	2	0.1	0.1624	1	0.3119	0.5732		1	ARS-BFGL-NGS-14285	2	1	DOM	5/20	81/190	0.3631		1	ARS-BFGL-NGS-14285	2	1	REC	0/25	7/264	1
1	BTB-01490065	30659162	1	0.08	0.08704	2	1	0.9121		1	BTB-01490065	1	2	DOM	4/21	44/226	1		1	BTB-01490065	1	2	REC	0/25	3/267	1
1	ARS-BFGL-NGS-73149	30694694	2	0.08	0.1444	1	0.2847	0.5151		1	ARS-BFGL-NGS-73149	2	1	DOM	4/21	74/196	0.247		1	ARS-BFGL-NGS-73149	2	1	REC	0/25	4/266	1
1	BovineHD0100008921	30743768	2	0.14	0.1798	1	0.5648	0.7427		1	BovineHD0100008921	2	1	DOM	7/18	87/180	0.8233		1	BovineHD0100008921	2	1	REC	0/25	9/258	1
1	BovineHD0100008923	30746202	2	0.14	0.1798	1	0.5648	0.7427		1	BovineHD0100008923	2	1	DOM	7/18	87/180	0.8233		1	BovineHD0100008923	2	1	REC	0/25	9/258	1
1	BovineHD0100008924	30746814	1	0.14	0.1798	2	0.5648	0.7427		1	BovineHD0100008924	1	2	DOM	7/18	87/180	0.8233		1	BovineHD0100008924	1	2	REC	0/25	9/258	1
1	BovineHD0100008927	30750780	2	0.14	0.1798	1	0.5648	0.7427		1	BovineHD0100008927	2	1	DOM	7/18	87/180	0.8233		1	BovineHD0100008927	2	1	REC	0/25	9/258	1
1	BovineHD0100008928	30751532	1	0.14	0.1798	2	0.5648	0.7427		1	BovineHD0100008928	1	2	DOM	7/18	87/180	0.8233		1	BovineHD0100008928	1	2	REC	0/25	9/258	1
1	BovineHD0100008930	30755257	1	0.14	0.1798	2	0.5648	0.7427		1	BovineHD0100008930	1	2	DOM	7/18	87/180	0.8233		1	BovineHD0100008930	1	2	REC	0/25	9/258	1
1	BTA-97531-no-rs	30759148	1	0.14	0.1827	2	0.5646	0.7284		1	BTA-97531-no-rs	1	2	DOM	7/18	90/181	0.6626		1	BTA-97531-no-rs	1	2	REC	0/25	9/262	1
1	BovineHD0100008936	30780515	1	0.04	0.07037	2	0.5644	0.5504		1	BovineHD0100008936	1	2	DOM	2/23	37/233	0.5502		1	BovineHD0100008936	1	2	REC	0/25	1/269	1
1	BTB-01490270	30840833	2	0.46	0.4225	1	0.6549	1.164		1	BTB-01490270	2	1	DOM	19/6	180/91	0.3809		1	BTB-01490270	2	1	REC	4/21	49/222	1
1	BovineHD0100008950	30893510	2	0.2917	0.2323	1	0.3765	1.36		1	BovineHD0100008950	2	1	DOM	13/11	114/155	0.2882		1	BovineHD0100008950	2	1	REC	1/23	11/258	1
1	BTA-18114-no-rs	30972284	1	0	0.04244	2	0.2464	0		1	BTA-18114-no-rs	1	2	DOM	0/25	21/250	0.2346		1	BTA-18114-no-rs	1	2	REC	0/25	2/269	1
1	ARS-BFGL-NGS-40158	30999614	2	0.08	0.1328	1	0.3785	0.5676		1	ARS-BFGL-NGS-40158	2	1	DOM	4/21	67/204	0.4636		1	ARS-BFGL-NGS-40158	2	1	REC	0/25	5/266	1
1	ARS-BFGL-BAC-11830	31035369	2	0.08	0.09779	1	1	0.8023		1	ARS-BFGL-BAC-11830	2	1	DOM	4/21	51/220	1		1	ARS-BFGL-BAC-11830	2	1	REC	0/25	2/269	1
1	BTB-01303393	31082779	1	0.16	0.2177	2	0.4695	0.6844		1	BTB-01303393	1	2	DOM	7/18	107/164	0.2907		1	BTB-01303393	1	2	REC	1/24	11/260	1
1	BTB-01303334	31129370	2	0.08	0.1019	1	0.8067	0.7668		1	BTB-01303334	2	1	DOM	4/21	52/218	1		1	BTB-01303334	2	1	REC	0/25	3/267	1
1	BTA-87372-no-rs	31151496	1	0.48	0.4834	2	1	0.9865		1	BTA-87372-no-rs	1	2	DOM	17/8	198/73	0.6401		1	BTA-87372-no-rs	1	2	REC	7/18	64/207	0.6276
1	BTA-41946-no-rs	31171747	1	0.36	0.2823	2	0.2558	1.43		1	BTA-41946-no-rs	1	2	DOM	14/11	132/139	0.5351		1	BTA-41946-no-rs	1	2	REC	4/21	21/250	0.2471
1	Hapmap32039-BTA-131798	31250241	1	0.06	0.06089	2	1	0.9845		1	Hapmap32039-BTA-131798	1	2	DOM	3/22	33/238	1		1	Hapmap32039-BTA-131798	1	2	REC	0/25	0/271	1
1	BovineHD0100009052	31270891	1	0.12	0.1537	2	0.6801	0.7508		1	BovineHD0100009052	1	2	DOM	5/20	77/193	0.4857		1	BovineHD0100009052	1	2	REC	1/24	6/264	0.4656
1	Hapmap50687-BTA-41950	31302244	1	0.06	0.07749	2	1	0.7599		1	Hapmap50687-BTA-41950	1	2	DOM	3/22	41/230	1		1	Hapmap50687-BTA-41950	1	2	REC	0/25	1/270	1
1	BTB-00013894	31424587	2	0.06	0.05904	1	1	1.017		1	BTB-00013894	2	1	DOM	3/22	32/239	1		1	BTB-00013894	2	1	REC	0/25	0/271	1
1	ARS-BFGL-NGS-97949	31450731	2	0	0.03321	1	0.3876	0		1	ARS-BFGL-NGS-97949	2	1	DOM	0/25	16/255	0.3772		1	ARS-BFGL-NGS-97949	2	1	REC	0/25	2/269	1
1	BovineHD0100009129	31557192	1	0.36	0.2722	2	0.1904	1.504		1	BovineHD0100009129	1	2	DOM	17/8	129/141	0.06123		1	BovineHD0100009129	1	2	REC	1/24	18/252	1
1	BTA-110980-no-rs	31606418	1	0.5	0.4539	2	0.5555	1.203		1	BTA-110980-no-rs	1	2	DOM	19/6	186/85	0.5057		1	BTA-110980-no-rs	1	2	REC	6/19	60/211	0.8044
1	BTB-01653833	31639548	2	0.48	0.4742	1	1	1.024		1	BTB-01653833	2	1	DOM	19/6	198/73	1		1	BTB-01653833	2	1	REC	5/20	59/212	1
1	BTB-01653794	31672750	1	0.38	0.3506	2	0.7573	1.135		1	BTB-01653794	1	2	DOM	17/8	160/111	0.5231		1	BTB-01653794	1	2	REC	2/23	30/241	1
1	BTB-01335754	31699827	2	0.1	0.1605	1	0.3124	0.5811		1	BTB-01335754	2	1	DOM	5/20	83/188	0.3615		1	BTB-01335754	2	1	REC	0/25	4/267	1
1	BTB-01335860	31755884	1	0.1	0.1033	2	1	0.9643		1	BTB-01335860	1	2	DOM	4/21	55/216	0.7952		1	BTB-01335860	1	2	REC	1/24	1/270	0.162
1	BovineHD0100009190	31915959	2	0.2	0.2111	1	1	0.9342		1	BovineHD0100009190	2	1	DOM	8/17	103/167	0.6677		1	BovineHD0100009190	2	1	REC	2/23	11/259	0.3032
1	BovineHD0100009210	32073771	2	0.44	0.3843	1	0.4514	1.259		1	BovineHD0100009210	2	1	DOM	17/8	164/104	0.6676		1	BovineHD0100009210	2	1	REC	5/20	42/226	0.5703
1	BTB-01843131	32091115	1	0.12	0.2122	2	0.1438	0.5063		1	BTB-01843131	1	2	DOM	6/19	104/167	0.196		1	BTB-01843131	1	2	REC	0/25	11/260	0.6078
1	ARS-BFGL-NGS-80747	32132657	2	0.16	0.2454	1	0.2243	0.5858		1	ARS-BFGL-NGS-80747	2	1	DOM	8/17	117/154	0.2999		1	ARS-BFGL-NGS-80747	2	1	REC	0/25	16/255	0.3772
1	BTB-01955576	32247439	2	0.12	0.179	1	0.3365	0.6256		1	BTB-01955576	2	1	DOM	5/20	87/184	0.2627		1	BTB-01955576	2	1	REC	1/24	10/261	1
1	BTB-01755357	32304105	2	0.4	0.3672	1	0.6487	1.149		1	BTB-01755357	2	1	DOM	17/8	163/108	0.5243		1	BTB-01755357	2	1	REC	3/22	36/235	1
1	BTB-02018681	32357222	1	0.1	0.1766	2	0.236	0.5181		1	BTB-02018681	1	2	DOM	4/21	84/185	0.1689		1	BTB-02018681	1	2	REC	1/24	11/258	1
1	BTB-00014284	32424393	2	0.22	0.2122	1	0.8581	1.047		1	BTB-00014284	2	1	DOM	10/15	105/166	1		1	BTB-00014284	2	1	REC	1/24	10/261	1
1	BTB-00014368	32511532	1	0.1	0.1716	2	0.2354	0.5364		1	BTB-00014368	1	2	DOM	4/21	82/189	0.1691		1	BTB-00014368	1	2	REC	1/24	11/260	1
1	BTB-00014500	32640244	1	0.16	0.2897	2	0.06832	0.4671		1	BTB-00014500	1	2	DOM	8/17	134/137	0.1418		1	BTB-00014500	1	2	REC	0/25	23/248	0.2369
1	BTB-00014527	32683856	2	0.14	0.1208	1	0.6538	1.185		1	BTB-00014527	2	1	DOM	6/19	60/209	0.8054		1	BTB-00014527	2	1	REC	1/24	5/264	0.4161
1	Hapmap38175-BTA-69177	32741957	1	0.5	0.428	2	0.3717	1.336		1	Hapmap38175-BTA-69177	1	2	DOM	21/4	186/85	0.1694		1	Hapmap38175-BTA-69177	1	2	REC	4/21	46/225	1
1	BovineHD0100009346	32866434	2	0.46	0.5037	1	0.6578	0.8393		1	BovineHD0100009346	2	1	DOM	19/6	204/66	1		1	BovineHD0100009346	2	1	REC	4/21	68/202	0.4648
1	BTB-00014850	32943411	1	0.14	0.1611	2	0.8409	0.8476		1	BTB-00014850	1	2	DOM	6/19	79/191	0.6518		1	BTB-00014850	1	2	REC	1/24	8/262	0.5545
1	BTB-00014929	32993823	2	0.14	0.1661	1	0.8415	0.8176		1	BTB-00014929	2	1	DOM	6/19	79/192	0.6524		1	BTB-00014929	2	1	REC	1/24	11/260	1
1	BTA-69182-no-rs	33076473	2	0.4	0.2657	1	0.04809	1.843		1	BTA-69182-no-rs	2	1	DOM	16/9	124/147	0.09537		1	BTA-69182-no-rs	2	1	REC	4/21	20/251	0.1313
1	BTB-00015164	33136647	1	0.38	0.369	2	0.8793	1.048		1	BTB-00015164	1	2	DOM	15/10	163/108	1		1	BTB-00015164	1	2	REC	4/21	37/234	0.7617
1	Hapmap58994-rs29021251	33175064	1	0.04	0.04982	2	1	0.7948		1	Hapmap58994-rs29021251	1	2	DOM	2/23	25/246	1		1	Hapmap58994-rs29021251	1	2	REC	0/25	2/269	1
1	BovineHD0100009448	33218979	1	0.42	0.4685	2	0.5553	0.8215		1	BovineHD0100009448	1	2	DOM	16/9	199/71	0.3468		1	BovineHD0100009448	1	2	REC	5/20	54/216	1
1	BTB-00016647	33342088	1	0.46	0.4336	2	0.7665	1.113		1	BTB-00016647	1	2	DOM	18/7	184/87	0.8234		1	BTB-00016647	1	2	REC	5/20	51/220	0.7954
1	BTA-69212-no-rs	33398878	1	0.28	0.3911	2	0.1307	0.6053		1	BTA-69212-no-rs	1	2	DOM	12/13	176/95	0.127		1	BTA-69212-no-rs	1	2	REC	2/23	36/235	0.7534
1	BovineHD0100009494	33426743	1	0.52	0.3358	2	0.01264	2.143		1	BovineHD0100009494	1	2	DOM	18/7	150/121	0.1399		1	BovineHD0100009494	1	2	REC	8/17	32/239	0.01044
1	BovineHD0100009515	33496557	1	0.1	0.2426	2	0.0218	0.3469		1	BovineHD0100009515	1	2	DOM	4/21	116/154	0.009723		1	BovineHD0100009515	1	2	REC	1/24	15/255	1
1	Hapmap48855-BTA-69221	33560583	2	0.02	0.2472	1	3.111e-05	0.06214		1	Hapmap48855-BTA-69221	2	1	DOM	1/24	118/153	2.927e-05		1	Hapmap48855-BTA-69221	2	1	REC	0/25	16/255	0.3772
1	BovineHD0100009559	33607347	1	0.52	0.4352	2	0.2976	1.406		1	BovineHD0100009559	1	2	DOM	19/6	184/86	0.5034		1	BovineHD0100009559	1	2	REC	7/18	51/219	0.2934
1	BTA-69226-no-rs	33610831	1	0.7	0.4004	2	7.071e-05	3.495		1	BTA-69226-no-rs	1	2	DOM	23/2	173/98	0.003444		1	BTA-69226-no-rs	1	2	REC	12/13	44/227	0.0005039
1	BovineHD0100009570	33634151	1	0.16	0.4407	2	7.372e-05	0.2417		1	BovineHD0100009570	1	2	DOM	7/18	181/89	0.0002829		1	BovineHD0100009570	1	2	REC	1/24	57/213	0.03678
1	BovineHD0100009592	33688529	2	0.3	0.2019	1	0.1055	1.695		1	BovineHD0100009592	2	1	DOM	14/11	99/171	0.08351		1	BovineHD0100009592	2	1	REC	1/24	10/260	1
1	BTB-00902072	33805826	1	0.08	0.1259	2	0.4969	0.6036		1	BTB-00902072	1	2	DOM	4/21	63/207	0.6173		1	BTB-00902072	1	2	REC	0/25	5/265	1
1	BovineHD0100009633	33826972	2	0.4	0.4906	1	0.2389	0.6921		1	BovineHD0100009633	2	1	DOM	17/8	199/68	0.4796		1	BovineHD0100009633	2	1	REC	3/22	63/204	0.2204
1	BovineHD0100009652	33903021	1	0.25	0.5185	2	0.0004297	0.3095		1	BovineHD0100009652	1	2	DOM	10/14	206/64	0.001015		1	BovineHD0100009652	1	2	REC	2/22	74/196	0.04977
1	ARS-BFGL-NGS-45064	33916347	2	0.7	0.4428	1	0.0005671	2.936		1	ARS-BFGL-NGS-45064	2	1	DOM	23/2	186/85	0.01162		1	ARS-BFGL-NGS-45064	2	1	REC	12/13	54/217	0.00402
1	BovineHD0100009664	33935558	1	0.44	0.4336	2	1	1.026		1	BovineHD0100009664	1	2	DOM	17/8	185/86	1		1	BovineHD0100009664	1	2	REC	5/20	50/221	0.7918
1	Hapmap43403-BTA-91448	33964232	2	0.38	0.2768	1	0.1406	1.602		1	Hapmap43403-BTA-91448	2	1	DOM	15/10	130/141	0.2983		1	Hapmap43403-BTA-91448	2	1	REC	4/21	20/251	0.1313
1	BTB-01419032	33988612	2	0.02	0.09888	1	0.07256	0.186		1	BTB-01419032	2	1	DOM	1/24	51/217	0.09505		1	BTB-01419032	2	1	REC	0/25	2/266	1
1	BovineHD0100009674	33992020	1	0.54	0.487	2	0.5547	1.236		1	BovineHD0100009674	1	2	DOM	20/5	200/70	0.6353		1	BovineHD0100009674	1	2	REC	7/18	63/207	0.6248
1	BTA-91456-no-rs	34021093	2	0.02	0.0941	1	0.1114	0.1965		1	BTA-91456-no-rs	2	1	DOM	1/24	51/220	0.09431		1	BTA-91456-no-rs	2	1	REC	0/25	0/271	1
1	Hapmap34824-BES10_Contig592_452	34068395	1	0.36	0.3727	2	1	0.9468		1	Hapmap34824-BES10_Contig592_452	1	2	DOM	16/9	167/104	1		1	Hapmap34824-BES10_Contig592_452	1	2	REC	2/23	35/236	0.7517
1	BovineHD0100009723	34158319	1	0.1	0.1648	2	0.3122	0.563		1	BovineHD0100009723	1	2	DOM	5/20	81/189	0.3626		1	BovineHD0100009723	1	2	REC	0/25	8/262	1
1	BTB-00929993	34231964	2	0	0.04428	1	0.2507	0		1	BTB-00929993	2	1	DOM	0/25	24/247	0.2411		1	BTB-00929993	2	1	REC	0/25	0/271	1
1	Hapmap55373-rs29027574	34360152	1	0.22	0.3376	2	0.1146	0.5533		1	Hapmap55373-rs29027574	1	2	DOM	11/14	157/114	0.208		1	Hapmap55373-rs29027574	1	2	REC	0/25	26/245	0.1452
1	BTB-00930093	34400126	2	0.02	0.1107	1	0.04846	0.1639		1	BTB-00930093	2	1	DOM	1/24	59/212	0.03597		1	BTB-00930093	2	1	REC	0/25	1/270	1
1	BTB-00930215	34424718	1	0.34	0.3542	2	0.8785	0.9391		1	BTB-00930215	1	2	DOM	14/11	159/112	0.8339		1	BTB-00930215	1	2	REC	3/22	33/238	1
1	BTB-00930351	34458042	2	0.02	0.09041	1	0.1091	0.2053		1	BTB-00930351	2	1	DOM	1/24	49/222	0.0927		1	BTB-00930351	2	1	REC	0/25	0/271	1
1	Hapmap49364-BTA-89353	34500276	2	0.3	0.3339	1	0.7537	0.8548		1	Hapmap49364-BTA-89353	2	1	DOM	13/12	149/122	0.8352		1	Hapmap49364-BTA-89353	2	1	REC	2/23	32/239	0.751
1	BTB-01965833	34602877	1	0.6	0.4649	2	0.07622	1.726		1	BTB-01965833	1	2	DOM	20/5	193/78	0.4859		1	BTB-01965833	1	2	REC	10/15	59/212	0.04861
1	BTB-01965810	34624045	2	0.1	0.1144	1	1	0.8602		1	BTB-01965810	2	1	DOM	4/21	56/215	0.7954		1	BTB-01965810	2	1	REC	1/24	6/265	0.4644
1	BovineHD0100009808	34629115	1	0.34	0.4889	2	0.0538	0.5386		1	BovineHD0100009808	1	2	DOM	13/12	188/82	0.07672		1	BovineHD0100009808	1	2	REC	4/21	76/194	0.2434
1	BovineHD0100009809	34638715	1	0.24	0.3801	2	0.06477	0.5149		1	BovineHD0100009809	1	2	DOM	9/16	159/108	0.03284		1	BovineHD0100009809	1	2	REC	3/22	44/223	0.7773
1	Hapmap43629-BTA-60810	34663026	1	0.46	0.4981	2	0.6587	0.8582		1	Hapmap43629-BTA-60810	1	2	DOM	17/8	194/76	0.6503		1	Hapmap43629-BTA-60810	1	2	REC	6/19	75/195	0.817
1	BTB-01211075	34723604	2	0.14	0.3444	1	0.002545	0.3098		1	BTB-01211075	2	1	DOM	6/19	147/123	0.005561		1	BTB-01211075	2	1	REC	1/24	39/231	0.2211
1	Hapmap47907-BTA-29493	34756687	1	0.08	0.06273	2	0.551	1.299		1	Hapmap47907-BTA-29493	1	2	DOM	4/21	34/237	0.5425		1	Hapmap47907-BTA-29493	1	2	REC	0/25	0/271	1
1	Hapmap43823-BTA-27227	34779787	2	0.44	0.4649	1	0.7687	0.9042		1	Hapmap43823-BTA-27227	2	1	DOM	17/8	193/78	0.8183		1	Hapmap43823-BTA-27227	2	1	REC	5/20	59/212	1
1	BTB-01890914	34803049	2	0.16	0.2638	1	0.1273	0.5315		1	BTB-01890914	2	1	DOM	7/18	125/146	0.09452		1	BTB-01890914	2	1	REC	1/24	18/253	1
1	UA-IFASA-4161	34824930	2	0.44	0.4613	1	0.8823	0.9177		1	UA-IFASA-4161	2	1	DOM	17/8	191/80	0.8206		1	UA-IFASA-4161	2	1	REC	5/20	59/212	1
1	BTB-01210899	34866883	2	0.02	0.07963	1	0.1618	0.2359		1	BTB-01210899	2	1	DOM	1/24	40/230	0.2227		1	BTB-01210899	2	1	REC	0/25	3/267	1
1	ARS-BFGL-BAC-12481	34908448	1	0.16	0.3339	2	0.01093	0.3799		1	ARS-BFGL-BAC-12481	1	2	DOM	7/18	143/128	0.02118		1	ARS-BFGL-BAC-12481	1	2	REC	1/24	38/233	0.2209
1	BovineHD0100009896	34918486	2	0.02	0.1124	1	0.04892	0.1612		1	BovineHD0100009896	2	1	DOM	1/24	56/211	0.03705		1	BovineHD0100009896	2	1	REC	0/25	4/263	1
1	BovineHD0100009902	34927781	2	0	0.04815	1	0.1547	0		1	BovineHD0100009902	2	1	DOM	0/25	25/245	0.1464		1	BovineHD0100009902	2	1	REC	0/25	1/269	1
1	BTB-00017000	34931862	2	0.38	0.2897	1	0.1968	1.503		1	BTB-00017000	2	1	DOM	14/11	135/136	0.6769		1	BTB-00017000	2	1	REC	5/20	22/249	0.06318
1	Hapmap43052-BTA-79184	34954810	1	0.24	0.1513	2	0.107	1.772		1	Hapmap43052-BTA-79184	1	2	DOM	10/15	75/196	0.2467		1	Hapmap43052-BTA-79184	1	2	REC	2/23	7/264	0.1709
1	BTA-79188-no-rs	34978818	2	0.02	0.03889	1	1	0.5044		1	BTA-79188-no-rs	2	1	DOM	1/24	21/249	0.706		1	BTA-79188-no-rs	2	1	REC	0/25	0/270	1
1	BTA-111131-no-rs	35000632	2	0.48	0.4059	1	0.3678	1.351		1	BTA-111131-no-rs	2	1	DOM	17/8	179/92	1		1	BTA-111131-no-rs	2	1	REC	7/18	41/230	0.1499
1	BovineHD0100009933	35043254	2	0.36	0.395	1	0.653	0.8614		1	BovineHD0100009933	2	1	DOM	15/10	166/96	0.8289		1	BovineHD0100009933	2	1	REC	3/22	41/221	0.7777
1	BTB-01210806	35050813	1	0.36	0.3911	2	0.7622	0.8756		1	BTB-01210806	1	2	DOM	15/10	171/100	0.8297		1	BTB-01210806	1	2	REC	3/22	41/230	1
1	BovineHD0100009941	35065680	1	0.3	0.374	2	0.3579	0.7172		1	BovineHD0100009941	1	2	DOM	12/13	157/105	0.2896		1	BovineHD0100009941	1	2	REC	3/22	39/223	1
1	BovineHD0100009943	35076740	1	0.3	0.3664	2	0.4411	0.7411		1	BovineHD0100009943	1	2	DOM	12/13	154/108	0.2997		1	BovineHD0100009943	1	2	REC	3/22	38/224	1
1	BovineHD0100009944	35081085	1	0.3	0.3664	2	0.4411	0.7411		1	BovineHD0100009944	1	2	DOM	12/13	154/108	0.2997		1	BovineHD0100009944	1	2	REC	3/22	38/224	1
1	BovineHD0100009945	35082343	1	0.3	0.3611	2	0.4422	0.7582		1	BovineHD0100009945	1	2	DOM	12/13	157/113	0.399		1	BovineHD0100009945	1	2	REC	3/22	38/232	1
1	BovineHD0100009950	35109384	1	0.52	0.4679	2	0.5539	1.232		1	BovineHD0100009950	1	2	DOM	19/6	192/73	0.8171		1	BovineHD0100009950	1	2	REC	7/18	56/209	0.4483
1	BovineHD0100009954	35124823	2	0.52	0.4777	1	0.6576	1.185		1	BovineHD0100009954	2	1	DOM	19/6	197/72	1		1	BovineHD0100009954	2	1	REC	7/18	60/209	0.6176
1	BTA-111133-no-rs	35149839	1	0.24	0.3819	2	0.04781	0.5111		1	BTA-111133-no-rs	1	2	DOM	10/15	166/105	0.05388		1	BTA-111133-no-rs	1	2	REC	2/23	41/230	0.5515
1	BovineHD0100009976	35197382	2	0.02	0.1604	1	0.005479	0.1068		1	BovineHD0100009976	2	1	DOM	1/24	84/181	0.002197		1	BovineHD0100009976	2	1	REC	0/25	1/264	1
1	ARS-BFGL-NGS-100434	35277715	1	0.04	0.1882	2	0.005763	0.1797		1	ARS-BFGL-NGS-100434	1	2	DOM	2/23	98/173	0.003444		1	ARS-BFGL-NGS-100434	1	2	REC	0/25	4/267	1
1	BovineHD0100010000	35292924	1	0.44	0.4532	2	0.883	0.9481		1	BovineHD0100010000	1	2	DOM	17/8	188/79	0.8208		1	BovineHD0100010000	1	2	REC	5/20	54/213	1
1	BovineHD0100010002	35301764	1	0.1	0.2185	2	0.04685	0.3974		1	BovineHD0100010002	1	2	DOM	5/20	110/160	0.05285		1	BovineHD0100010002	1	2	REC	0/25	8/262	1
1	BovineHD0100010009	35343945	1	0.4	0.3327	2	0.3508	1.337		1	BovineHD0100010009	1	2	DOM	14/11	146/123	1		1	BovineHD0100010009	1	2	REC	6/19	33/236	0.1188
1	BTB-00016701	35345339	2	0.26	0.428	1	0.02396	0.4695		1	BTB-00016701	2	1	DOM	11/14	185/86	0.02498		1	BTB-00016701	2	1	REC	2/23	47/224	0.3958
1	BovineHD0100010010	35346762	1	0.36	0.4981	2	0.07521	0.5668		1	BovineHD0100010010	1	2	DOM	15/10	197/65	0.15		1	BovineHD0100010010	1	2	REC	3/22	64/198	0.2174
1	BovineHD0100010011	35347543	2	0.36	0.4943	1	0.07642	0.5755		1	BovineHD0100010011	2	1	DOM	15/10	196/66	0.1519		1	BovineHD0100010011	2	1	REC	3/22	63/199	0.2182
1	BovineHD0100010012	35348417	1	0.36	0.4943	2	0.07648	0.5754		1	BovineHD0100010012	1	2	DOM	15/10	198/67	0.1525		1	BovineHD0100010012	1	2	REC	3/22	64/201	0.2181
1	BovineHD0100010019	35371662	2	0.1	0.09815	1	1	1.021		1	BovineHD0100010019	2	1	DOM	4/21	50/220	1		1	BovineHD0100010019	2	1	REC	1/24	3/267	0.2996
1	BovineHD0100010029	35401745	1	0.34	0.3981	2	0.453	0.7787		1	BovineHD0100010029	1	2	DOM	14/11	174/96	0.3947		1	BovineHD0100010029	1	2	REC	3/22	41/229	1
1	DPI-55	35424977	1	0.04	0.1389	2	0.04773	0.2583		1	DPI-55	1	2	DOM	2/23	70/200	0.0513		1	DPI-55	1	2	REC	0/25	5/265	1
1	BovineHD0100010042	35440283	1	0.34	0.4033	2	0.451	0.762		1	BovineHD0100010042	1	2	DOM	14/11	176/93	0.3845		1	BovineHD0100010042	1	2	REC	3/22	41/228	1
1	BovineHD0100010051	35462050	1	0.4	0.3123	2	0.2079	1.468		1	BovineHD0100010051	1	2	DOM	17/8	137/132	0.1419		1	BovineHD0100010051	1	2	REC	3/22	31/238	1
1	BovineHD0100010072	35546605	2	0.36	0.3611	1	1	0.9952		1	BovineHD0100010072	2	1	DOM	15/10	163/107	1		1	BovineHD0100010072	2	1	REC	3/22	32/238	1
1	Hapmap32018-BTA-123851	35567873	2	0.24	0.1716	1	0.245	1.525		1	Hapmap32018-BTA-123851	2	1	DOM	10/15	82/189	0.367		1	Hapmap32018-BTA-123851	2	1	REC	2/23	11/260	0.3017
1	BovineHD0100010132	35686183	1	0.34	0.2389	2	0.1238	1.641		1	BovineHD0100010132	1	2	DOM	15/10	110/160	0.08901		1	BovineHD0100010132	1	2	REC	2/23	19/251	0.6949
1	BTB-00016898	35722253	2	0.02	0.1033	1	0.0744	0.1771		1	BTB-00016898	2	1	DOM	1/24	54/217	0.05833		1	BTB-00016898	2	1	REC	0/25	2/269	1
1	BTB-00016906	35774336	2	0.12	0.179	1	0.3365	0.6256		1	BTB-00016906	2	1	DOM	5/20	91/180	0.1876		1	BTB-00016906	2	1	REC	1/24	6/265	0.4644
1	ARS-BFGL-NGS-60721	35809354	1	0.3	0.2159	2	0.2123	1.557		1	ARS-BFGL-NGS-60721	1	2	DOM	14/11	101/170	0.08556		1	ARS-BFGL-NGS-60721	1	2	REC	1/24	16/255	1
1	BovineHD0100010183	35833095	1	0.4	0.283	2	0.1031	1.689		1	BovineHD0100010183	1	2	DOM	17/8	122/143	0.03849		1	BovineHD0100010183	1	2	REC	3/22	28/237	0.7388
1	BovineHD0100010199	35884896	1	0.26	0.2759	2	0.87	0.922		1	BovineHD0100010199	1	2	DOM	11/14	124/146	1		1	BovineHD0100010199	1	2	REC	2/23	25/245	1
1	BovineHD0100010213	35933171	1	0.32	0.2695	2	0.5071	1.275		1	BovineHD0100010213	1	2	DOM	12/13	121/148	0.8351		1	BovineHD0100010213	1	2	REC	4/21	24/245	0.2765
1	BovineHD0100010229	35976438	2	0.24	0.2602	1	0.8665	0.8977		1	BovineHD0100010229	2	1	DOM	10/15	118/151	0.8339		1	BovineHD0100010229	2	1	REC	2/23	22/247	1
1	DPI-2	36007508	2	0.16	0.1476	1	0.8352	1.1		1	DPI-2	2	1	DOM	7/18	72/199	0.8179		1	DPI-2	2	1	REC	1/24	8/263	0.5532
1	BovineHD0100010243	36026109	1	0.42	0.4317	2	1	0.9531		1	BovineHD0100010243	1	2	DOM	17/8	186/85	1		1	BovineHD0100010243	1	2	REC	4/21	48/223	1
1	BTB-00017157	36215840	2	0.16	0.1439	1	0.68	1.133		1	BTB-00017157	2	1	DOM	7/18	70/201	0.8136		1	BTB-00017157	2	1	REC	1/24	8/263	0.5532
1	BovineHD0100010274	36241055	2	0.54	0.4594	1	0.3015	1.381		1	BovineHD0100010274	2	1	DOM	20/5	187/84	0.3618		1	BovineHD0100010274	2	1	REC	7/18	62/209	0.6212
1	BovineHD0100010279	36271350	2	0.16	0.1311	1	0.5189	1.263		1	BovineHD0100010279	2	1	DOM	7/18	64/203	0.6313		1	BovineHD0100010279	2	1	REC	1/24	6/261	0.4692
1	Hapmap40144-BTA-79228	36294078	1	0	0.01481	2	1	0		1	Hapmap40144-BTA-79228	1	2	DOM	0/25	8/262	1		1	Hapmap40144-BTA-79228	1	2	REC	0/25	0/270	1
1	BovineHD0100010292	36303690	2	0.26	0.4682	1	0.004637	0.3991		1	BovineHD0100010292	2	1	DOM	11/14	185/82	0.0139		1	BovineHD0100010292	2	1	REC	2/23	65/202	0.0803
1	BovineHD0100010297	36315758	2	0.4	0.3407	1	0.4379	1.29		1	BovineHD0100010297	2	1	DOM	16/9	153/117	0.5319		1	BovineHD0100010297	2	1	REC	4/21	31/239	0.5157
1	Hapmap41641-BTA-79222	36352663	1	0.48	0.4631	2	0.8826	1.07		1	Hapmap41641-BTA-79222	1	2	DOM	18/7	194/77	1		1	Hapmap41641-BTA-79222	1	2	REC	6/19	57/214	0.7983
1	BTB-00017988	36393512	1	0.2	0.3838	2	0.009202	0.4014		1	BTB-00017988	1	2	DOM	8/17	161/110	0.01061		1	BTB-00017988	1	2	REC	2/23	47/224	0.3958
1	BovineHD0100010321	36401673	1	0.42	0.3056	2	0.1115	1.646		1	BovineHD0100010321	1	2	DOM	16/9	141/129	0.2992		1	BovineHD0100010321	1	2	REC	5/20	24/246	0.08342
1	BovineHD0100010328	36426174	1	0.2	0.263	2	0.3995	0.7007		1	BovineHD0100010328	1	2	DOM	9/16	125/145	0.4027		1	BovineHD0100010328	1	2	REC	1/24	17/253	1
1	ARS-BFGL-BAC-4996	36459510	1	0.42	0.2989	2	0.0805	1.699		1	ARS-BFGL-BAC-4996	1	2	DOM	16/9	138/133	0.2955		1	ARS-BFGL-BAC-4996	1	2	REC	5/20	24/247	0.08243
1	Hapmap57330-rs29009759	36486706	1	0.12	0.1734	2	0.4313	0.6499		1	Hapmap57330-rs29009759	1	2	DOM	6/19	88/183	0.5023		1	Hapmap57330-rs29009759	1	2	REC	0/25	6/265	1
1	BTA-79216-no-rs	36519957	2	0.1	0.04613	1	0.165	2.298		1	BTA-79216-no-rs	2	1	DOM	4/21	24/247	0.2745		1	BTA-79216-no-rs	2	1	REC	1/24	1/270	0.162
1	BovineHD0100010364	36554587	2	0.42	0.5019	1	0.3021	0.7188		1	BovineHD0100010364	2	1	DOM	16/9	198/72	0.3504		1	BovineHD0100010364	2	1	REC	5/20	73/197	0.6356
1	BTB-00017697	36582476	1	0.12	0.06827	2	0.2467	1.861		1	BTB-00017697	1	2	DOM	5/20	36/235	0.3632		1	BTB-00017697	1	2	REC	1/24	1/270	0.162
1	ARS-BFGL-BAC-11284	36610037	1	0.22	0.4041	2	0.01003	0.416		1	ARS-BFGL-BAC-11284	1	2	DOM	10/15	173/98	0.0296		1	ARS-BFGL-BAC-11284	1	2	REC	1/24	46/225	0.1472
1	ARS-BFGL-NGS-116207	36639642	2	0.16	0.3321	1	0.01109	0.3831		1	ARS-BFGL-NGS-116207	2	1	DOM	7/18	150/121	0.01121		1	ARS-BFGL-NGS-116207	2	1	REC	1/24	30/241	0.4918
1	Hapmap50474-BTA-79209	36666981	2	0	0.02214	1	0.6122	0		1	Hapmap50474-BTA-79209	2	1	DOM	0/25	12/259	0.6082		1	Hapmap50474-BTA-79209	2	1	REC	0/25	0/271	1
1	BovineHD0100010393	36673470	1	0.66	0.4465	2	0.004593	2.406		1	BovineHD0100010393	1	2	DOM	21/4	180/91	0.07723		1	BovineHD0100010393	1	2	REC	12/13	62/209	0.01332
1	BTB-00017422	36693898	2	0.18	0.1956	1	1	0.9029		1	BTB-00017422	2	1	DOM	8/17	91/180	1		1	BTB-00017422	2	1	REC	1/24	15/256	1
1	BovineHD0100010400	36708125	2	0.42	0.3759	1	0.5455	1.202		1	BovineHD0100010400	2	1	DOM	16/9	161/109	0.8316		1	BovineHD0100010400	2	1	REC	5/20	42/228	0.5685
1	BovineHD0100010416	36791630	1	0.1	0.2823	2	0.00413	0.2825		1	BovineHD0100010416	1	2	DOM	5/20	136/135	0.005546		1	BovineHD0100010416	1	2	REC	0/25	17/254	0.3773
1	Hapmap43356-BTA-79201	36796167	1	0.04	0.1771	2	0.009002	0.1936		1	Hapmap43356-BTA-79201	1	2	DOM	2/23	88/183	0.01103		1	Hapmap43356-BTA-79201	1	2	REC	0/25	8/263	1
1	BovineHD0100010421	36813260	2	0.26	0.4465	1	0.0111	0.4356		1	BovineHD0100010421	2	1	DOM	11/14	179/92	0.0475		1	BovineHD0100010421	2	1	REC	2/23	63/208	0.1258
1	BovineHD0100010461	36943147	2	0.56	0.4188	1	0.07239	1.766		1	BovineHD0100010461	2	1	DOM	19/6	166/105	0.1953		1	BovineHD0100010461	2	1	REC	9/16	61/210	0.1422
1	Hapmap50634-BTA-26738	36991506	2	0.34	0.3266	1	0.8754	1.062		1	Hapmap50634-BTA-26738	2	1	DOM	13/12	148/123	0.8361		1	Hapmap50634-BTA-26738	2	1	REC	4/21	29/242	0.501
1	BovineHD0100010491	37050569	2	0.16	0.1421	1	0.6765	1.15		1	BovineHD0100010491	2	1	DOM	7/18	70/201	0.8136		1	BovineHD0100010491	2	1	REC	1/24	7/264	0.5107
1	Hapmap49369-BTA-89952	37219767	1	0.34	0.3506	2	1	0.9544		1	Hapmap49369-BTA-89952	1	2	DOM	13/12	157/114	0.6734		1	Hapmap49369-BTA-89952	1	2	REC	4/21	33/238	0.5325
1	BovineHD0100010528	37232068	2	0.26	0.2082	1	0.3715	1.336		1	BovineHD0100010528	2	1	DOM	10/15	99/170	0.8294		1	BovineHD0100010528	2	1	REC	3/22	13/256	0.145
1	BovineHD0100010535	37260062	2	0.36	0.4077	1	0.5498	0.817		1	BovineHD0100010535	2	1	DOM	14/11	179/92	0.3805		1	BovineHD0100010535	2	1	REC	4/21	42/229	1
1	BTA-115758-no-rs	37299219	2	0.02	0.1015	1	0.07333	0.1807		1	BTA-115758-no-rs	2	1	DOM	1/24	53/218	0.05865		1	BTA-115758-no-rs	2	1	REC	0/25	2/269	1
1	BovineHD0100010565	37336681	2	0.42	0.4205	1	1	0.9981		1	BovineHD0100010565	2	1	DOM	16/9	176/88	0.826		1	BovineHD0100010565	2	1	REC	5/20	46/218	0.7836
1	BovineHD0100010579	37359664	1	0.28	0.2528	2	0.7346	1.15		1	BovineHD0100010579	1	2	DOM	11/14	119/152	1		1	BovineHD0100010579	1	2	REC	3/22	18/253	0.4024
1	BovineHD0100010581	37368303	1	0.1	0.1245	2	0.8214	0.7811		1	BovineHD0100010581	1	2	DOM	5/20	63/202	0.8078		1	BovineHD0100010581	1	2	REC	0/25	3/262	1
1	DPI-27	37381473	1	0.44	0.3081	2	0.05893	1.764		1	DPI-27	1	2	DOM	16/9	138/133	0.2955		1	DPI-27	1	2	REC	6/19	29/242	0.09558
1	BTA-111760-no-rs	37412751	1	0.06	0.07011	2	1	0.8466		1	BTA-111760-no-rs	1	2	DOM	3/22	37/234	1		1	BTA-111760-no-rs	1	2	REC	0/25	1/270	1
1	BovineHD4100000204	37455994	1	0.5	0.3487	2	0.04456	1.868		1	BovineHD4100000204	1	2	DOM	18/7	153/118	0.1447		1	BovineHD4100000204	1	2	REC	7/18	36/235	0.06849
1	Hapmap46343-BTA-111768	37513415	2	0.5	0.3561	1	0.04738	1.808		1	Hapmap46343-BTA-111768	2	1	DOM	18/7	157/114	0.2053		1	Hapmap46343-BTA-111768	2	1	REC	7/18	36/235	0.06849
1	BTA-111771-no-rs	37570425	2	0.42	0.4019	1	0.8804	1.078		1	BTA-111771-no-rs	2	1	DOM	16/9	170/100	1		1	BTA-111771-no-rs	2	1	REC	5/20	47/223	0.7837
1	BovineHD0100010640	37575077	1	0.16	0.3346	2	0.01085	0.3788		1	BovineHD0100010640	1	2	DOM	7/18	143/123	0.0199		1	BovineHD0100010640	1	2	REC	1/24	35/231	0.3356
1	ARS-BFGL-NGS-84905	37606303	2	0.3	0.3667	1	0.4418	0.7403		1	ARS-BFGL-NGS-84905	2	1	DOM	11/14	156/114	0.2091		1	ARS-BFGL-NGS-84905	2	1	REC	4/21	42/228	1
1	BTA-120277-no-rs	37642573	1	0.26	0.1919	2	0.2654	1.48		1	BTA-120277-no-rs	1	2	DOM	10/15	86/185	0.3831		1	BTA-120277-no-rs	1	2	REC	3/22	18/253	0.4024
1	BovineHD0100010694	37723915	2	0.44	0.4887	1	0.5556	0.8221		1	BovineHD0100010694	2	1	DOM	17/8	194/71	0.639		1	BovineHD0100010694	2	1	REC	5/20	65/200	0.8075
1	BovineHD4100000205	37780384	1	0.3	0.3303	2	0.7538	0.8691		1	BovineHD4100000205	1	2	DOM	12/13	145/126	0.6773		1	BovineHD4100000205	1	2	REC	3/22	34/237	1
1	BovineHD0100010740	37812572	2	0.44	0.461	1	0.8823	0.9188		1	BovineHD0100010740	2	1	DOM	17/8	192/77	0.8178		1	BovineHD0100010740	2	1	REC	5/20	56/213	1
1	BovineHD0100010753	37875353	2	0.32	0.2435	1	0.2349	1.462		1	BovineHD0100010753	2	1	DOM	12/13	111/158	0.5314		1	BovineHD0100010753	2	1	REC	4/21	20/249	0.1338
1	BovineHD0100010754	37876071	2	0.32	0.2538	1	0.3136	1.384		1	BovineHD0100010754	2	1	DOM	12/13	113/151	0.6753		1	BovineHD0100010754	2	1	REC	4/21	21/243	0.251
1	Hapmap42111-BTA-122184	37900339	2	0	0.01107	1	1	0		1	Hapmap42111-BTA-122184	2	1	DOM	0/25	6/265	1		1	Hapmap42111-BTA-122184	2	1	REC	0/25	0/271	1
1	ARS-BFGL-NGS-23720	37942216	2	0.44	0.3893	1	0.5456	1.233		1	ARS-BFGL-NGS-23720	2	1	DOM	16/9	168/103	1		1	ARS-BFGL-NGS-23720	2	1	REC	6/19	43/228	0.2722
1	ARS-BFGL-NGS-53463	38076935	2	0.32	0.2343	1	0.1718	1.538		1	ARS-BFGL-NGS-53463	2	1	DOM	12/13	109/162	0.5251		1	ARS-BFGL-NGS-53463	2	1	REC	4/21	18/253	0.1017
1	BovineHD0100010842	38112817	2	0.14	0.2876	1	0.03012	0.4033		1	BovineHD0100010842	2	1	DOM	6/19	131/135	0.02007		1	BovineHD0100010842	2	1	REC	1/24	22/244	0.7049
1	BovineHD0100010886	38222228	1	0.46	0.4599	2	1	1		1	BovineHD0100010886	1	2	DOM	18/7	186/76	1		1	BovineHD0100010886	1	2	REC	5/20	55/207	1
1	ARS-BFGL-NGS-100005	38262971	1	0.34	0.3524	2	1	0.9467		1	ARS-BFGL-NGS-100005	1	2	DOM	15/10	155/116	0.8356		1	ARS-BFGL-NGS-100005	1	2	REC	2/23	36/235	0.7534
1	ARS-BFGL-NGS-114608	38309499	1	0.4	0.4142	2	0.8817	0.9429		1	ARS-BFGL-NGS-114608	1	2	DOM	16/9	171/97	1		1	ARS-BFGL-NGS-114608	1	2	REC	4/21	51/217	1
1	BovineHD0100010966	38434232	1	0.26	0.2226	2	0.5954	1.227		1	BovineHD0100010966	1	2	DOM	11/14	105/160	0.6749		1	BovineHD0100010966	1	2	REC	2/23	13/252	0.3773
1	BovineHD0100010977	38490335	1	0.36	0.303	2	0.4248	1.294		1	BovineHD0100010977	1	2	DOM	14/11	135/134	0.6774		1	BovineHD0100010977	1	2	REC	4/21	28/241	0.3315
1	BovineHD0100011008	38597502	2	0.14	0.1734	1	0.6949	0.7759		1	BovineHD0100011008	2	1	DOM	7/18	86/185	0.8237		1	BovineHD0100011008	2	1	REC	0/25	8/263	1
1	ARS-BFGL-NGS-42813	38630217	2	0.28	0.2362	1	0.4907	1.258		1	ARS-BFGL-NGS-42813	2	1	DOM	11/14	109/162	0.8319		1	ARS-BFGL-NGS-42813	2	1	REC	3/22	19/252	0.4135
1	BovineHD0100011029	38649320	1	0.48	0.4586	2	0.7693	1.09		1	BovineHD0100011029	1	2	DOM	18/7	176/90	0.6604		1	BovineHD0100011029	1	2	REC	6/19	68/198	1
1	BovineHD0100011034	38673068	1	0.4	0.2955	2	0.1474	1.59		1	BovineHD0100011034	1	2	DOM	16/9	130/134	0.2093		1	BovineHD0100011034	1	2	REC	4/21	26/238	0.3091
1	ARS-BFGL-NGS-85768	38707374	2	0.02	0.07749	1	0.1626	0.243		1	ARS-BFGL-NGS-85768	2	1	DOM	1/24	39/232	0.221		1	ARS-BFGL-NGS-85768	2	1	REC	0/25	3/268	1
1	BTA-16749-no-rs	38752163	1	0.08	0.07196	2	0.7761	1.122		1	BTA-16749-no-rs	1	2	DOM	3/22	37/234	1		1	BTA-16749-no-rs	1	2	REC	1/24	2/269	0.2333
1	Hapmap51081-BTA-89053	38776974	1	0	0.01296	2	1	0		1	Hapmap51081-BTA-89053	1	2	DOM	0/25	7/263	1		1	Hapmap51081-BTA-89053	1	2	REC	0/25	0/270	1
1	BovineHD0100011072	38816049	2	0.24	0.321	1	0.268	0.6679		1	BovineHD0100011072	2	1	DOM	8/17	147/124	0.0375		1	BovineHD0100011072	2	1	REC	4/21	27/244	0.3133
1	BovineHD0100011079	38856511	1	0.16	0.3008	2	0.03476	0.4429		1	BovineHD0100011079	1	2	DOM	6/19	130/136	0.0205		1	BovineHD0100011079	1	2	REC	2/23	30/236	1
1	BovineHD0100011092	38919419	1	0.14	0.1823	2	0.5643	0.73		1	BovineHD0100011092	1	2	DOM	6/19	88/178	0.5025		1	BovineHD0100011092	1	2	REC	1/24	9/257	0.5987
1	BovineHD0100011097	38944944	1	0.14	0.2698	2	0.04404	0.4406		1	BovineHD0100011097	1	2	DOM	6/19	124/141	0.03481		1	BovineHD0100011097	1	2	REC	1/24	19/246	1
1	BovineHD0100011107	38985194	2	0.14	0.2962	1	0.02064	0.3868		1	BovineHD0100011107	2	1	DOM	6/19	131/134	0.0199		1	BovineHD0100011107	2	1	REC	1/24	26/239	0.4885
1	ARS-BFGL-NGS-97815	39014333	1	0.4	0.2952	2	0.1475	1.592		1	ARS-BFGL-NGS-97815	1	2	DOM	16/9	129/142	0.1442		1	ARS-BFGL-NGS-97815	1	2	REC	4/21	31/240	0.5148
1	BovineHD0100011117	39054297	2	0.2	0.3459	1	0.04101	0.4728		1	BovineHD0100011117	2	1	DOM	9/16	152/114	0.05711		1	BovineHD0100011117	2	1	REC	1/24	32/234	0.331
1	BovineHD0100011134	39142467	2	0.44	0.4792	1	0.6578	0.854		1	BovineHD0100011134	2	1	DOM	17/8	187/77	0.8192		1	BovineHD0100011134	2	1	REC	5/20	66/198	0.8081
1	BTA-109574-no-rs	39198219	2	0.52	0.3819	1	0.06892	1.753		1	BTA-109574-no-rs	2	1	DOM	19/6	162/109	0.1352		1	BTA-109574-no-rs	2	1	REC	7/18	45/226	0.1693
1	Hapmap39970-BTA-117984	39249574	1	0.3	0.2565	2	0.5028	1.243		1	Hapmap39970-BTA-117984	1	2	DOM	13/12	120/151	0.5306		1	Hapmap39970-BTA-117984	1	2	REC	2/23	19/252	0.6939
1	ARS-BFGL-NGS-26011	39292042	1	0.44	0.3247	2	0.1169	1.634		1	ARS-BFGL-NGS-26011	1	2	DOM	17/8	143/128	0.2076		1	ARS-BFGL-NGS-26011	1	2	REC	5/20	33/238	0.3421
1	BTA-96881-no-rs	39365760	2	0.44	0.2823	1	0.02342	1.998		1	BTA-96881-no-rs	2	1	DOM	17/8	129/142	0.06059		1	BTA-96881-no-rs	2	1	REC	5/20	24/247	0.08243
1	BovineHD0100011202	39399871	1	0.44	0.3155	2	0.08303	1.705		1	BovineHD0100011202	1	2	DOM	17/8	140/131	0.1439		1	BovineHD0100011202	1	2	REC	5/20	31/240	0.2056
1	BovineHD0100011251	39585612	1	0.48	0.4981	2	0.8827	0.93		1	BovineHD0100011251	1	2	DOM	19/6	202/64	1		1	BovineHD0100011251	1	2	REC	5/20	63/203	0.8079
1	BovineHD0100011262	39638269	1	0.24	0.2838	2	0.6217	0.7968		1	BovineHD0100011262	1	2	DOM	12/13	129/137	1		1	BovineHD0100011262	1	2	REC	0/25	22/244	0.2349
1	Hapmap47738-BTA-79246	39643915	2	0.3	0.3093	1	1	0.9572		1	Hapmap47738-BTA-79246	2	1	DOM	13/12	141/129	1		1	Hapmap47738-BTA-79246	2	1	REC	2/23	26/244	1
1	ARS-BFGL-BAC-12579	39724349	1	0.38	0.4742	2	0.2366	0.6797		1	ARS-BFGL-BAC-12579	1	2	DOM	15/10	192/79	0.2616		1	ARS-BFGL-BAC-12579	1	2	REC	4/21	65/206	0.4642
1	BovineHD0100011299	39791496	2	0.42	0.3996	1	0.7657	1.088		1	BovineHD0100011299	2	1	DOM	16/9	172/97	1		1	BovineHD0100011299	2	1	REC	5/20	43/226	0.5757
1	Hapmap27571-BTA-123885	39883372	1	0.2	0.3463	2	0.04107	0.4719		1	Hapmap27571-BTA-123885	1	2	DOM	7/18	154/116	0.006161		1	Hapmap27571-BTA-123885	1	2	REC	3/22	33/237	1
1	ARS-BFGL-NGS-107020	39954780	1	0.36	0.2362	2	0.0596	1.819		1	ARS-BFGL-NGS-107020	1	2	DOM	15/10	110/161	0.08876		1	ARS-BFGL-NGS-107020	1	2	REC	3/22	18/253	0.4024
1	BovineHD0100011370	39999162	1	0.3	0.4608	2	0.03657	0.5014		1	BovineHD0100011370	1	2	DOM	13/12	187/81	0.0755		1	BovineHD0100011370	1	2	REC	2/23	60/208	0.1237
1	BovineHD0100011377	40023410	2	0.56	0.468	1	0.2376	1.447		1	BovineHD0100011377	2	1	DOM	20/5	192/74	0.4867		1	BovineHD0100011377	2	1	REC	8/17	57/209	0.2186
1	BTB-00018760	40036006	2	0.38	0.3413	1	0.6413	1.183		1	BTB-00018760	2	1	DOM	15/10	153/118	0.8342		1	BTB-00018760	2	1	REC	4/21	32/239	0.5232
1	Hapmap38790-BTA-87413	40075624	2	0.52	0.4176	1	0.1795	1.511		1	Hapmap38790-BTA-87413	2	1	DOM	21/4	175/92	0.07464		1	Hapmap38790-BTA-87413	2	1	REC	5/20	48/219	0.7877
1	BovineHD0100011399	40135823	1	0.24	0.1805	2	0.3401	1.434		1	BovineHD0100011399	1	2	DOM	10/15	86/180	0.5054		1	BovineHD0100011399	1	2	REC	2/23	10/256	0.2754
1	ARS-BFGL-BAC-13195	40136994	1	0.08	0.07963	2	1	1.005		1	ARS-BFGL-BAC-13195	1	2	DOM	4/21	41/229	1		1	ARS-BFGL-BAC-13195	1	2	REC	0/25	2/268	1
1	BTB-01806368	40162427	1	0.32	0.4244	2	0.1778	0.6384		1	BTB-01806368	1	2	DOM	12/13	175/96	0.1287		1	BTB-01806368	1	2	REC	4/21	55/216	0.7952
1	ARS-BFGL-NGS-34353	40189561	2	0.2	0.163	1	0.5502	1.284		1	ARS-BFGL-NGS-34353	2	1	DOM	9/16	80/190	0.5014		1	ARS-BFGL-NGS-34353	2	1	REC	1/24	8/262	0.5545
1	BTB-00018513	40216456	2	0.08	0.07963	1	1	1.005		1	BTB-00018513	2	1	DOM	4/21	41/229	1		1	BTB-00018513	2	1	REC	0/25	2/268	1
1	ARS-BFGL-NGS-20360	40253747	1	0.12	0.07778	2	0.2809	1.617		1	ARS-BFGL-NGS-20360	1	2	DOM	6/19	40/230	0.2474		1	ARS-BFGL-NGS-20360	1	2	REC	0/25	2/268	1
1	BTB-00018431	40278698	1	0.6	0.4889	2	0.1417	1.568		1	BTB-00018431	1	2	DOM	21/4	196/75	0.2454		1	BTB-00018431	1	2	REC	9/16	69/202	0.2454
1	BTB-00018408	40296142	1	0.24	0.1845	2	0.3464	1.396		1	BTB-00018408	1	2	DOM	10/15	88/183	0.5064		1	BTB-00018408	1	2	REC	2/23	12/259	0.3347
1	BTB-01249999	40420207	2	0.32	0.3266	1	1	0.9704		1	BTB-01249999	2	1	DOM	12/13	149/122	0.5346		1	BTB-01249999	2	1	REC	4/21	28/243	0.3283
1	BTA-117821-no-rs	40452500	2	0.18	0.2731	1	0.1817	0.5844		1	BTA-117821-no-rs	2	1	DOM	9/16	133/138	0.2955		1	BTA-117821-no-rs	2	1	REC	0/25	15/256	0.6246
1	BovineHD0100011469	40467149	2	0.38	0.4267	1	0.5527	0.8235		1	BovineHD0100011469	2	1	DOM	15/10	185/81	0.3682		1	BovineHD0100011469	2	1	REC	4/21	42/224	1
1	BTB-01250106	40506922	2	0.4	0.2678	1	0.06824	1.823		1	BTB-01250106	2	1	DOM	15/10	126/141	0.2955		1	BTB-01250106	2	1	REC	5/20	17/250	0.02935
1	ARS-BFGL-NGS-86662	40576723	1	0.5	0.4779	2	0.7698	1.093		1	ARS-BFGL-NGS-86662	1	2	DOM	18/7	196/75	1		1	ARS-BFGL-NGS-86662	1	2	REC	7/18	63/208	0.6241
1	ARS-BFGL-BAC-13216	40629765	2	0.44	0.4613	1	0.8823	0.9177		1	ARS-BFGL-BAC-13216	2	1	DOM	18/7	185/86	0.8237		1	ARS-BFGL-BAC-13216	2	1	REC	4/21	65/206	0.4642
1	BovineHD0100011507	40652007	2	0.1	0.04699	1	0.1675	2.253		1	BovineHD0100011507	2	1	DOM	4/21	23/243	0.2683		1	BovineHD0100011507	2	1	REC	1/24	2/264	0.237
1	ARS-BFGL-NGS-23908	40691521	2	0.04	0.05224	1	1	0.756		1	ARS-BFGL-NGS-23908	2	1	DOM	2/23	27/241	1		1	ARS-BFGL-NGS-23908	2	1	REC	0/25	1/267	1
1	BTB-01250420	40721810	1	0.1	0.04244	2	0.07763	2.507		1	BTB-01250420	1	2	DOM	4/21	21/250	0.2471		1	BTB-01250420	1	2	REC	1/24	2/269	0.2333
1	BovineHD0100011523	40725446	2	0.28	0.3472	1	0.4354	0.7313		1	BovineHD0100011523	2	1	DOM	11/14	153/112	0.2092		1	BovineHD0100011523	2	1	REC	3/22	31/234	1
1	Hapmap45471-BTA-117823	40748287	1	0.58	0.4797	2	0.186	1.498		1	Hapmap45471-BTA-117823	1	2	DOM	20/5	191/80	0.365		1	Hapmap45471-BTA-117823	1	2	REC	9/16	69/202	0.2454
1	BTB-01250478	40763708	2	0.36	0.297	1	0.4209	1.331		1	BTB-01250478	2	1	DOM	15/10	131/140	0.3004		1	BTB-01250478	2	1	REC	3/22	30/241	0.7488
1	ARS-BFGL-NGS-111921	40795725	2	0.18	0.3247	1	0.03789	0.4565		1	ARS-BFGL-NGS-111921	2	1	DOM	8/17	145/126	0.0581		1	ARS-BFGL-NGS-111921	2	1	REC	1/24	31/240	0.4958
1	BovineHD0100011535	40811598	2	0.18	0.3307	1	0.03739	0.4442		1	BovineHD0100011535	2	1	DOM	8/17	139/118	0.038		1	BovineHD0100011535	2	1	REC	1/24	31/226	0.3303
1	BTB-01952363	40834252	2	0.34	0.2768	1	0.3298	1.346		1	BTB-01952363	2	1	DOM	13/12	132/139	0.8357		1	BTB-01952363	2	1	REC	4/21	18/253	0.1017
1	BTA-111731-no-rs	40864128	2	0	0.0369	1	0.4002	0		1	BTA-111731-no-rs	2	1	DOM	0/25	20/251	0.393		1	BTA-111731-no-rs	2	1	REC	0/25	0/271	1
1	ARS-BFGL-NGS-32825	40909078	1	0.34	0.2749	2	0.327	1.359		1	ARS-BFGL-NGS-32825	1	2	DOM	14/11	125/146	0.4047		1	ARS-BFGL-NGS-32825	1	2	REC	3/22	24/247	0.4866
1	BTB-01462455	40956637	2	0	0.04815	1	0.1547	0		1	BTB-01462455	2	1	DOM	0/25	26/244	0.1451		1	BTB-01462455	2	1	REC	0/25	0/270	1
1	Hapmap34927-BES7_Contig453_1164	40987746	2	0.14	0.2	1	0.3558	0.6512		1	Hapmap34927-BES7_Contig453_1164	2	1	DOM	6/19	94/176	0.3776		1	Hapmap34927-BES7_Contig453_1164	2	1	REC	1/24	14/256	1
1	Hapmap38709-BTA-88324	41023006	2	0.1	0.1439	1	0.5237	0.661		1	Hapmap38709-BTA-88324	2	1	DOM	5/20	74/197	0.4896		1	Hapmap38709-BTA-88324	2	1	REC	0/25	4/267	1
1	ARS-BFGL-NGS-100232	41088436	2	0.14	0.19	1	0.4519	0.6938		1	ARS-BFGL-NGS-100232	2	1	DOM	6/19	90/181	0.5032		1	ARS-BFGL-NGS-100232	2	1	REC	1/24	13/258	1
1	BTB-01555269	41160880	2	0.36	0.3801	1	0.8792	0.9175		1	BTB-01555269	2	1	DOM	15/10	162/109	1		1	BTB-01555269	2	1	REC	3/22	44/227	0.7774
1	BovineHD0100046971	41184151	1	0.4	0.3542	2	0.539	1.216		1	BovineHD0100046971	1	2	DOM	18/7	145/119	0.1388		1	BovineHD0100046971	1	2	REC	2/23	42/222	0.392
1	BTB-01555328	41196178	2	0.26	0.4185	1	0.03444	0.4882		1	BTB-01555328	2	1	DOM	11/14	175/95	0.05065		1	BTB-01555328	2	1	REC	2/23	51/219	0.2741
1	BovineHD0100011631	41216415	2	0.36	0.4771	1	0.1378	0.6165		1	BovineHD0100011631	2	1	DOM	15/10	185/77	0.2649		1	BovineHD0100011631	2	1	REC	3/22	65/197	0.2175
1	ARS-BFGL-NGS-45335	41245618	2	0.26	0.4262	1	0.0242	0.473		1	ARS-BFGL-NGS-45335	2	1	DOM	11/14	178/93	0.04809		1	ARS-BFGL-NGS-45335	2	1	REC	2/23	53/218	0.1882
1	BTB-01135685	41366993	2	0.24	0.1624	1	0.1683	1.629		1	BTB-01135685	2	1	DOM	10/15	77/194	0.2528		1	BTB-01135685	2	1	REC	2/23	11/260	0.3017
1	BovineHD0100011712	41428053	1	0.3	0.2688	2	0.6208	1.166		1	BovineHD0100011712	1	2	DOM	12/13	120/146	0.8353		1	BovineHD0100011712	1	2	REC	3/22	23/243	0.4774
1	BTB-01135743	41433644	2	0.26	0.2278	1	0.6005	1.191		1	BTB-01135743	2	1	DOM	11/14	107/163	0.6751		1	BTB-01135743	2	1	REC	2/23	16/254	0.6564
1	Hapmap23514-BTA-150593	41455680	2	0.22	0.1494	1	0.2185	1.605		1	Hapmap23514-BTA-150593	2	1	DOM	11/14	72/199	0.1004		1	Hapmap23514-BTA-150593	2	1	REC	0/25	9/262	1
1	Hapmap47786-BTA-95575	41562654	1	0.08	0.1255	2	0.4967	0.6061		1	Hapmap47786-BTA-95575	1	2	DOM	4/21	64/207	0.4657		1	Hapmap47786-BTA-95575	1	2	REC	0/25	4/267	1
1	BovineHD0100011755	41586998	1	0.32	0.2688	2	0.5066	1.28		1	BovineHD0100011755	1	2	DOM	15/10	119/147	0.2073		1	BovineHD0100011755	1	2	REC	1/24	24/242	0.7077
1	BovineHD0100011761	41618997	2	0.4	0.3371	1	0.4357	1.311		1	BovineHD0100011761	2	1	DOM	16/9	144/120	0.4061		1	BovineHD0100011761	2	1	REC	4/21	34/230	0.7551
1	BovineHD0100011765	41632942	2	0.24	0.2124	1	0.7182	1.171		1	BovineHD0100011765	2	1	DOM	12/13	99/160	0.3926		1	BovineHD0100011765	2	1	REC	0/25	11/248	0.6068
1	BovineHD0100011774	41670410	1	0.44	0.392	2	0.5464	1.218		1	BovineHD0100011774	1	2	DOM	18/7	163/101	0.3896		1	BovineHD0100011774	1	2	REC	4/21	44/220	1
1	BTA-95584-no-rs	41686185	1	0.14	0.203	2	0.355	0.6393		1	BTA-95584-no-rs	1	2	DOM	6/19	97/174	0.2785		1	BTA-95584-no-rs	1	2	REC	1/24	13/258	1
1	BovineHD0100011786	41728692	1	0.44	0.3477	2	0.217	1.474		1	BovineHD0100011786	1	2	DOM	18/7	149/117	0.1421		1	BovineHD0100011786	1	2	REC	4/21	36/230	0.7605
1	Hapmap38486-BTA-30602	41750066	1	0.48	0.4207	2	0.4562	1.271		1	Hapmap38486-BTA-30602	1	2	DOM	18/7	181/90	0.6626		1	Hapmap38486-BTA-30602	1	2	REC	6/19	47/224	0.4152
1	BovineHD0100011799	41770783	1	0.4	0.3914	2	1	1.037		1	BovineHD0100011799	1	2	DOM	15/10	169/98	0.8292		1	BovineHD0100011799	1	2	REC	5/20	40/227	0.5603
1	Hapmap38103-BTA-28646	41788052	2	0.32	0.2159	1	0.1098	1.709		1	Hapmap38103-BTA-28646	2	1	DOM	13/12	107/164	0.2872		1	Hapmap38103-BTA-28646	2	1	REC	3/22	10/261	0.08647
1	BTB-01848824	41835927	1	0.4	0.3432	2	0.4399	1.276		1	BTB-01848824	1	2	DOM	18/7	149/122	0.1393		1	BTB-01848824	1	2	REC	2/23	37/234	0.5505
1	BTA-122159-no-rs	41860729	1	0.28	0.3967	2	0.1289	0.5915		1	BTA-122159-no-rs	1	2	DOM	13/12	169/102	0.3906		1	BTA-122159-no-rs	1	2	REC	1/24	46/225	0.1472
1	BTB-01136210	41886688	1	0.08	0.1328	2	0.3785	0.5676		1	BTB-01136210	1	2	DOM	4/21	70/201	0.3416		1	BTB-01136210	1	2	REC	0/25	2/269	1
1	BovineHD0100011834	41905455	2	0.44	0.4377	1	1	1.009		1	BovineHD0100011834	2	1	DOM	17/8	186/79	0.8217		1	BovineHD0100011834	2	1	REC	5/20	46/219	0.7833
1	BovineHD0100011840	41922668	2	0.28	0.2774	1	1	1.013		1	BovineHD0100011840	2	1	DOM	11/14	127/138	0.8348		1	BovineHD0100011840	2	1	REC	3/22	20/245	0.4322
1	ARS-BFGL-NGS-106725	41948372	2	0.22	0.3229	1	0.1533	0.5915		1	ARS-BFGL-NGS-106725	2	1	DOM	10/15	153/118	0.1418		1	ARS-BFGL-NGS-106725	2	1	REC	1/24	22/249	0.7052
1	BovineHD0100011849	41949404	1	0.52	0.4889	2	0.7678	1.132		1	BovineHD0100011849	1	2	DOM	19/6	203/68	1		1	BovineHD0100011849	1	2	REC	7/18	62/209	0.6212
1	Hapmap54599-rs29019617	41978469	2	0.28	0.3778	1	0.2202	0.6405		1	Hapmap54599-rs29019617	2	1	DOM	10/15	160/110	0.08901		1	Hapmap54599-rs29019617	2	1	REC	4/21	44/226	1
1	ARS-BFGL-NGS-23369	42009799	1	0.32	0.321	2	1	0.9953		1	ARS-BFGL-NGS-23369	1	2	DOM	14/11	145/126	0.8374		1	ARS-BFGL-NGS-23369	1	2	REC	2/23	29/242	1
1	1_41754173	42125330	2	0.24	0.3472	1	0.1588	0.5938		1	1_41754173	2	1	DOM	10/15	147/118	0.1477		1	1_41754173	2	1	REC	2/23	37/228	0.5489
1	1_41768691	42139849	2	0.08	0.1326	1	0.3779	0.5689		1	1_41768691	2	1	DOM	4/21	65/199	0.463		1	1_41768691	2	1	REC	0/25	5/259	1
1	Hapmap48210-BTA-120730	42205645	2	0.38	0.3727	1	1	1.032		1	Hapmap48210-BTA-120730	2	1	DOM	15/10	160/111	1		1	Hapmap48210-BTA-120730	2	1	REC	4/21	42/229	1
1	BovineHD0100011951	42217977	1	0.34	0.3044	2	0.6319	1.177		1	BovineHD0100011951	1	2	DOM	14/11	142/129	0.8352		1	BovineHD0100011951	1	2	REC	3/22	23/248	0.4703
1	ARS-BFGL-NGS-106432	42264448	2	0.54	0.4022	1	0.07131	1.745		1	ARS-BFGL-NGS-106432	2	1	DOM	20/5	171/100	0.1252		1	ARS-BFGL-NGS-106432	2	1	REC	7/18	47/224	0.1839
1	ARS-BFGL-BAC-15157	42285326	2	0.46	0.31	1	0.03903	1.896		1	ARS-BFGL-BAC-15157	2	1	DOM	19/6	138/133	0.0203		1	ARS-BFGL-BAC-15157	2	1	REC	4/21	30/241	0.5074
1	Hapmap50812-BTA-89669	42347846	1	0.3	0.2362	2	0.3046	1.386		1	Hapmap50812-BTA-89669	1	2	DOM	12/13	114/157	0.6734		1	Hapmap50812-BTA-89669	1	2	REC	3/22	14/257	0.1639
1	1_41998867	42370137	2	0.58	0.4436	1	0.07475	1.732		1	1_41998867	2	1	DOM	21/4	181/85	0.115		1	1_41998867	2	1	REC	8/17	55/211	0.2057
1	BTB-01708786	42513439	2	0.6	0.3967	1	0.006615	2.281		1	BTB-01708786	2	1	DOM	22/3	165/106	0.008115		1	BTB-01708786	2	1	REC	8/17	50/221	0.1154
1	BovineHD0100012074	42562079	2	0.26	0.4556	1	0.007413	0.4199		1	BovineHD0100012074	2	1	DOM	11/14	192/78	0.01126		1	BovineHD0100012074	2	1	REC	2/23	54/216	0.1864
1	BovineHD0100012062	42600264	1	0.1	0.126	2	0.8217	0.771		1	BovineHD0100012062	1	2	DOM	4/21	63/199	0.4634		1	BovineHD0100012062	1	2	REC	1/24	3/259	0.3069
1	BTA-104608-no-rs	42672277	2	0.16	0.203	1	0.5801	0.7481		1	BTA-104608-no-rs	2	1	DOM	8/17	99/172	0.8283		1	BTA-104608-no-rs	2	1	REC	0/25	11/260	0.6078
1	ARS-BFGL-NGS-93346	42776430	1	0.16	0.2424	2	0.2241	0.5952		1	ARS-BFGL-NGS-93346	1	2	DOM	8/17	113/151	0.3969		1	ARS-BFGL-NGS-93346	1	2	REC	0/25	15/249	0.3781
1	BovineHD0100012112	42827966	1	0.46	0.382	2	0.2912	1.378		1	BovineHD0100012112	1	2	DOM	17/8	166/101	0.6681		1	BovineHD0100012112	1	2	REC	6/19	38/229	0.2367
1	BTB-00019582	42863111	1	0.22	0.3985	2	0.01449	0.4257		1	BTB-00019582	1	2	DOM	9/16	169/102	0.01721		1	BTB-00019582	1	2	REC	2/23	47/224	0.3958
1	ARS-BFGL-NGS-10059	42912279	1	0.14	0.2085	2	0.3567	0.618		1	ARS-BFGL-NGS-10059	1	2	DOM	7/18	101/170	0.3947		1	ARS-BFGL-NGS-10059	1	2	REC	0/25	12/259	0.6082
1	Hapmap53820-rs29010070	42990139	1	0.22	0.1513	2	0.2216	1.582		1	Hapmap53820-rs29010070	1	2	DOM	9/16	79/192	0.4963		1	Hapmap53820-rs29010070	1	2	REC	2/23	3/268	0.05856
1	BovineHD0100012163	43053603	1	0.04	0.08555	2	0.4147	0.4454		1	BovineHD0100012163	1	2	DOM	2/23	44/219	0.3917		1	BovineHD0100012163	1	2	REC	0/25	1/262	1
1	BovineHD0100012167	43077482	1	0.42	0.375	2	0.5442	1.207		1	BovineHD0100012167	1	2	DOM	16/9	162/98	1		1	BovineHD0100012167	1	2	REC	5/20	33/227	0.3505
1	BovineHD0100012169	43080767	1	0.16	0.1734	2	1	0.9078		1	BovineHD0100012169	1	2	DOM	7/18	86/185	0.8237		1	BovineHD0100012169	1	2	REC	1/24	8/263	0.5532
1	BTB-00019705	43090697	1	0.34	0.3266	2	0.8754	1.062		1	BTB-00019705	1	2	DOM	14/11	148/123	1		1	BTB-00019705	1	2	REC	3/22	29/242	0.7415
1	BovineHD0100012176	43101882	2	0.16	0.2432	1	0.2235	0.5926		1	BovineHD0100012176	2	1	DOM	7/18	110/149	0.2031		1	BovineHD0100012176	2	1	REC	1/24	16/243	1
1	ARS-BFGL-NGS-106220	43119017	1	0.04	0.1015	2	0.2115	0.3689		1	ARS-BFGL-NGS-106220	1	2	DOM	2/23	53/218	0.1882		1	ARS-BFGL-NGS-106220	1	2	REC	0/25	2/269	1
1	BovineHD0100012187	43129718	1	0.42	0.4385	2	0.8817	0.9274		1	BovineHD0100012187	1	2	DOM	17/8	177/83	1		1	BovineHD0100012187	1	2	REC	4/21	51/209	0.7954
1	BovineHD0100012213	43188983	2	0.6	0.4636	1	0.07541	1.736		1	BovineHD0100012213	2	1	DOM	21/4	188/73	0.2434		1	BovineHD0100012213	2	1	REC	9/16	54/207	0.1256
1	ARS-BFGL-NGS-12781	43211702	1	0.14	0.1808	2	0.5647	0.7375		1	ARS-BFGL-NGS-12781	1	2	DOM	6/19	89/182	0.5024		1	ARS-BFGL-NGS-12781	1	2	REC	1/24	9/262	0.5921
1	BovineHD0100012223	43219861	2	0.16	0.1605	1	1	0.9962		1	BovineHD0100012223	2	1	DOM	7/18	79/192	1		1	BovineHD0100012223	2	1	REC	1/24	8/263	0.5532
1	Hapmap60973-rs29018366	43258943	2	0.46	0.3838	1	0.2932	1.368		1	Hapmap60973-rs29018366	2	1	DOM	17/8	169/102	0.6687		1	Hapmap60973-rs29018366	2	1	REC	6/19	39/232	0.2394
1	BovineHD0100012243	43299897	1	0.26	0.1502	2	0.06587	1.988		1	BovineHD0100012243	1	2	DOM	10/15	70/193	0.1649		1	BovineHD0100012243	1	2	REC	3/22	9/254	0.07535
1	BovineHD0100012247	43320196	1	0.08	0.107	2	0.8084	0.7256		1	BovineHD0100012247	1	2	DOM	3/22	52/219	0.5901		1	BovineHD0100012247	1	2	REC	1/24	6/265	0.4644
1	BTA-89691-no-rs	43390633	1	0.04	0.01852	2	0.2702	2.208		1	BTA-89691-no-rs	1	2	DOM	2/23	10/260	0.2699		1	BTA-89691-no-rs	1	2	REC	0/25	0/270	1
1	BTB-00019912	43428471	1	0.24	0.2657	2	0.8668	0.8728		1	BTB-00019912	1	2	DOM	9/16	129/142	0.3003		1	BTB-00019912	1	2	REC	3/22	15/256	0.1859
1	Hapmap46502-BTA-89692	43454408	1	0.42	0.3764	2	0.546	1.2		1	Hapmap46502-BTA-89692	1	2	DOM	17/8	164/107	0.5257		1	Hapmap46502-BTA-89692	1	2	REC	4/21	40/231	0.7744
1	BovineHD0100012280	43511030	1	0.38	0.3454	2	0.6429	1.161		1	BovineHD0100012280	1	2	DOM	16/9	147/115	0.5291		1	BovineHD0100012280	1	2	REC	3/22	34/228	1
1	BovineHD0100012296	43581024	2	0.4	0.4981	1	0.2364	0.6717		1	BovineHD0100012296	2	1	DOM	16/9	202/65	0.2295		1	BovineHD0100012296	2	1	REC	4/21	64/203	0.464
1	BTA-20952-no-rs	43637189	2	0.6	0.4723	1	0.1034	1.676		1	BTA-20952-no-rs	2	1	DOM	21/4	200/71	0.3404		1	BTA-20952-no-rs	2	1	REC	9/16	56/215	0.08239
1	BTA-89708-no-rs	43658641	2	0.3	0.2878	1	0.871	1.06		1	BTA-89708-no-rs	2	1	DOM	13/12	140/131	1		1	BTA-89708-no-rs	2	1	REC	2/23	16/255	0.6557
1	BovineHD0100012322	43678256	2	0.36	0.3745	1	0.8797	0.9394		1	BovineHD0100012322	2	1	DOM	15/10	162/105	1		1	BovineHD0100012322	2	1	REC	3/22	38/229	1
1	Hapmap47773-BTA-89713	43709324	2	0.2	0.2804	1	0.2496	0.6414		1	Hapmap47773-BTA-89713	2	1	DOM	10/15	127/144	0.5376		1	Hapmap47773-BTA-89713	2	1	REC	0/25	25/246	0.1466
1	BovineHD0100012336	43726634	1	0.3	0.3042	2	1	0.9804		1	BovineHD0100012336	1	2	DOM	14/11	128/135	0.5345		1	BovineHD0100012336	1	2	REC	1/24	32/231	0.3306
1	BovineHD0100012344	43740582	1	0.36	0.3467	2	0.877	1.06		1	BovineHD0100012344	1	2	DOM	15/10	155/106	1		1	BovineHD0100012344	1	2	REC	3/22	26/235	0.728
1	BovineHD0100012362	43774210	2	0.36	0.2376	1	0.06087	1.804		1	BovineHD0100012362	2	1	DOM	14/11	105/158	0.1388		1	BovineHD0100012362	2	1	REC	4/21	20/243	0.1416
1	BTB-00020638	43787631	2	0.08	0.1181	1	0.6413	0.6495		1	BTB-00020638	2	1	DOM	4/21	60/211	0.6154		1	BTB-00020638	2	1	REC	0/25	4/267	1
1	BTB-00020648	43810175	1	0.12	0.155	2	0.6805	0.7435		1	BTB-00020648	1	2	DOM	6/19	80/191	0.6509		1	BTB-00020648	1	2	REC	0/25	4/267	1
1	BTA-89719-no-rs	43831502	2	0.38	0.3782	1	1	1.008		1	BTA-89719-no-rs	2	1	DOM	16/9	166/105	0.8336		1	BTA-89719-no-rs	2	1	REC	3/22	39/232	1
1	BovineHD0100012401	43874971	2	0.46	0.4485	1	0.8828	1.048		1	BovineHD0100012401	2	1	DOM	18/7	181/81	0.8249		1	BovineHD0100012401	2	1	REC	5/20	54/208	1
1	BovineHD0100012402	43881377	1	0.36	0.3288	2	0.6404	1.148		1	BovineHD0100012402	1	2	DOM	15/10	145/112	0.8338		1	BovineHD0100012402	1	2	REC	3/22	24/233	0.7185
1	BovineHD0100012406	43897459	2	0.16	0.2302	1	0.2917	0.637		1	BovineHD0100012406	2	1	DOM	7/18	109/156	0.2854		1	BovineHD0100012406	2	1	REC	1/24	13/252	1
1	ARS-BFGL-NGS-19097	43901606	2	0.38	0.3708	1	0.8798	1.04		1	ARS-BFGL-NGS-19097	2	1	DOM	15/10	167/104	1		1	ARS-BFGL-NGS-19097	2	1	REC	4/21	34/237	0.5425
1	ARS-BFGL-NGS-106743	43925940	2	0.32	0.2657	1	0.4084	1.301		1	ARS-BFGL-NGS-106743	2	1	DOM	14/11	119/152	0.2951		1	ARS-BFGL-NGS-106743	2	1	REC	2/23	25/246	1
1	BovineHD0100012410	43926615	1	0.4	0.4446	2	0.5563	0.8326		1	BovineHD0100012410	1	2	DOM	16/9	184/87	0.6625		1	BovineHD0100012410	1	2	REC	4/21	57/214	0.796
1	BovineHD0100012427	43970492	2	0.24	0.2575	1	0.8667	0.9105		1	BovineHD0100012427	2	1	DOM	10/15	115/151	0.8346		1	BovineHD0100012427	2	1	REC	2/23	22/244	1
1	BovineHD0100012450	44010211	2	0.4	0.3925	1	1	1.032		1	BovineHD0100012450	2	1	DOM	16/9	164/101	1		1	BovineHD0100012450	2	1	REC	4/21	44/221	1
1	ARS-BFGL-NGS-96886	44050867	2	0.24	0.1926	1	0.4563	1.324		1	ARS-BFGL-NGS-96886	2	1	DOM	12/13	91/179	0.1881		1	ARS-BFGL-NGS-96886	2	1	REC	0/25	13/257	0.6115
1	Hapmap49368-BTA-89726	44091302	1	0.18	0.1944	2	1	0.9094		1	Hapmap49368-BTA-89726	1	2	DOM	9/16	94/176	1		1	Hapmap49368-BTA-89726	1	2	REC	0/25	11/259	0.6077
1	ARS-BFGL-NGS-116079	44217537	2	0.3	0.2509	1	0.4975	1.279		1	ARS-BFGL-NGS-116079	2	1	DOM	14/11	117/154	0.2927		1	ARS-BFGL-NGS-116079	2	1	REC	1/24	19/252	1
1	BovineHD0100012506	44229618	2	0.36	0.4421	1	0.2975	0.7099		1	BovineHD0100012506	2	1	DOM	15/10	176/83	0.5036		1	BovineHD0100012506	2	1	REC	3/22	53/206	0.4325
1	ARS-BFGL-NGS-118317	44288613	2	0.56	0.3911	1	0.02376	1.981		1	ARS-BFGL-NGS-118317	2	1	DOM	21/4	174/97	0.04897		1	ARS-BFGL-NGS-118317	2	1	REC	7/18	38/233	0.07834
1	BovineHD0100012535	44326918	1	0.34	0.3444	2	1	0.9808		1	BovineHD0100012535	1	2	DOM	15/10	145/112	0.8338		1	BovineHD0100012535	1	2	REC	2/23	32/225	0.7501
1	BovineHD0100012544	44359646	2	0.34	0.3817	1	0.6479	0.8345		1	BovineHD0100012544	2	1	DOM	15/10	159/103	1		1	BovineHD0100012544	2	1	REC	2/23	41/221	0.3932
1	Hapmap43396-BTA-89742	44375152	1	0.02	0.0369	2	1	0.5327		1	Hapmap43396-BTA-89742	1	2	DOM	1/24	20/251	1		1	Hapmap43396-BTA-89742	1	2	REC	0/25	0/271	1
1	BovineHD0100012553	44389663	2	0.12	0.1811	1	0.3351	0.6165		1	BovineHD0100012553	2	1	DOM	5/20	86/179	0.2614		1	BovineHD0100012553	2	1	REC	1/24	10/255	1
1	BovineHD0100012560	44422846	1	0.46	0.5037	2	0.6578	0.8394		1	BovineHD0100012560	1	2	DOM	21/4	203/68	0.4645		1	BovineHD0100012560	1	2	REC	2/23	70/201	0.05146
1	ARS-BFGL-NGS-57355	44475537	1	0.04	0.06273	2	0.7588	0.6225		1	ARS-BFGL-NGS-57355	1	2	DOM	2/23	31/240	1		1	ARS-BFGL-NGS-57355	1	2	REC	0/25	3/268	1
1	BTB-00021247	44499948	1	0.04	0.02052	2	0.306	1.989		1	BTB-00021247	1	2	DOM	2/23	11/257	0.3061		1	BTB-00021247	1	2	REC	0/25	0/268	1
1	BovineHD0100012597	44555369	2	0.08333	0.06844	1	0.7645	1.237		1	BovineHD0100012597	2	1	DOM	4/20	35/228	0.5483		1	BovineHD0100012597	2	1	REC	0/24	1/262	1
1	BTB-01788892	44802416	1	0.2	0.1642	2	0.5517	1.272		1	BTB-01788892	1	2	DOM	10/15	81/190	0.3646		1	BTB-01788892	1	2	REC	0/25	8/263	1
1	BovineHD0100046983	44983356	1	0.08333	0.08209	2	1	1.017		1	BovineHD0100046983	1	2	DOM	4/20	43/225	1		1	BovineHD0100046983	1	2	REC	0/24	1/267	1
1	BovineHD0100012940	45007205	1	0.38	0.4151	2	0.6555	0.8636		1	BovineHD0100012940	1	2	DOM	17/8	176/89	1		1	BovineHD0100012940	1	2	REC	2/23	44/221	0.3916
1	ARS-BFGL-NGS-75951	45042284	2	0.02	0.0572	1	0.5073	0.3364		1	ARS-BFGL-NGS-75951	2	1	DOM	1/24	30/241	0.4918		1	ARS-BFGL-NGS-75951	2	1	REC	0/25	1/270	1
1	BovineHD0100012946	45042921	2	0.3333	0.3769	1	0.6411	0.8267		1	BovineHD0100012946	2	1	DOM	15/9	163/105	1		1	BovineHD0100012946	2	1	REC	1/23	39/229	0.22
1	ARS-BFGL-NGS-31349	45090218	2	0.08	0.09594	1	1	0.8194		1	ARS-BFGL-NGS-31349	2	1	DOM	4/21	50/221	1		1	ARS-BFGL-NGS-31349	2	1	REC	0/25	2/269	1
1	BovineHD0100012963	45105866	2	0.5625	0.39	1	0.02169	2.011		1	BovineHD0100012963	2	1	DOM	20/4	158/101	0.04465		1	BovineHD0100012963	2	1	REC	7/17	44/215	0.1627
1	BovineHD0100012974	45146168	2	0.3	0.2749	1	0.7416	1.13		1	BovineHD0100012974	2	1	DOM	15/10	131/140	0.3004		1	BovineHD0100012974	2	1	REC	0/25	18/253	0.3802
1	BovineHD0100012982	45171571	2	0.25	0.3638	1	0.1555	0.5829		1	BovineHD0100012982	2	1	DOM	10/14	157/111	0.1326		1	BovineHD0100012982	2	1	REC	2/22	38/230	0.5499
1	BTB-01462206	45182041	1	0.02	0.05166	2	0.4996	0.3746		1	BTB-01462206	1	2	DOM	1/24	28/243	0.4879		1	BTB-01462206	1	2	REC	0/25	0/271	1
1	BTB-01462237	45213341	2	0.36	0.441	1	0.2989	0.7131		1	BTB-01462237	2	1	DOM	15/10	184/87	0.5045		1	BTB-01462237	2	1	REC	3/22	55/216	0.4335
1	BovineHD0100012997	45224996	2	0.6	0.4792	1	0.1063	1.63		1	BovineHD0100012997	2	1	DOM	21/4	195/70	0.3396		1	BovineHD0100012997	2	1	REC	9/16	59/206	0.1391
1	ARS-BFGL-NGS-68706	45236542	1	0.4	0.4556	2	0.4627	0.7967		1	ARS-BFGL-NGS-68706	1	2	DOM	18/7	188/82	1		1	ARS-BFGL-NGS-68706	1	2	REC	2/23	58/212	0.1258
1	ARS-BFGL-NGS-113748	45259100	1	0.22	0.3727	2	0.03168	0.4747		1	ARS-BFGL-NGS-113748	1	2	DOM	9/16	164/107	0.02025		1	ARS-BFGL-NGS-113748	1	2	REC	2/23	38/233	0.5492
1	Hapmap38803-BTA-104250	45281490	1	0.08	0.1199	2	0.496	0.6381		1	Hapmap38803-BTA-104250	1	2	DOM	4/21	61/210	0.6153		1	Hapmap38803-BTA-104250	1	2	REC	0/25	4/267	1
1	ARS-BFGL-NGS-119382	45324731	1	0.44	0.3782	2	0.4476	1.292		1	ARS-BFGL-NGS-119382	1	2	DOM	18/7	159/112	0.2097		1	ARS-BFGL-NGS-119382	1	2	REC	4/21	46/225	1
1	BTB-00478386	45350130	1	0.46	0.3185	2	0.05815	1.823		1	BTB-00478386	1	2	DOM	19/6	138/132	0.02051		1	BTB-00478386	1	2	REC	4/21	34/236	0.5438
1	BTB-00478374	45379246	1	0.2	0.3204	2	0.08117	0.5303		1	BTB-00478374	1	2	DOM	9/16	142/128	0.1434		1	BTB-00478374	1	2	REC	1/24	31/239	0.4962
1	BovineHD0100013052	45386077	1	0.4	0.3941	2	1	1.025		1	BovineHD0100013052	1	2	DOM	18/7	166/103	0.3898		1	BovineHD0100013052	1	2	REC	2/23	46/223	0.3939
1	ARS-BFGL-NGS-10512	45458660	2	0.54	0.4779	1	0.4604	1.283		1	ARS-BFGL-NGS-10512	2	1	DOM	22/3	193/78	0.09892		1	ARS-BFGL-NGS-10512	2	1	REC	5/20	66/205	0.8077
1	BovineHD0100013081	45476204	1	0.3333	0.3769	2	0.6409	0.8266		1	BovineHD0100013081	1	2	DOM	16/8	160/104	0.6645		1	BovineHD0100013081	1	2	REC	0/24	39/225	0.05496
1	BovineHD0100013084	45484321	2	0.14	0.1468	1	1	0.9458		1	BovineHD0100013084	2	1	DOM	7/18	70/199	0.8146		1	BovineHD0100013084	2	1	REC	0/25	9/260	1
1	BTA-90373-no-rs	45519346	1	0.3	0.2214	2	0.2184	1.507		1	BTA-90373-no-rs	1	2	DOM	15/10	105/166	0.05388		1	BTA-90373-no-rs	1	2	REC	0/25	15/256	0.6246
1	BovineHD0100013097	45544351	1	0.1667	0.2548	2	0.2215	0.5851		1	BovineHD0100013097	1	2	DOM	7/17	115/148	0.1992		1	BovineHD0100013097	1	2	REC	1/23	19/244	1
1	ARS-BFGL-NGS-34687	45555607	2	0.46	0.4207	1	0.6543	1.173		1	ARS-BFGL-NGS-34687	2	1	DOM	19/6	176/95	0.378		1	ARS-BFGL-NGS-34687	2	1	REC	4/21	52/219	1
1	BovineHD0100013102	45563997	2	0.4167	0.4356	1	0.8796	0.9255		1	BovineHD0100013102	2	1	DOM	18/6	174/90	0.4984		1	BovineHD0100013102	2	1	REC	2/22	56/208	0.1841
1	BTB-01461996	45612781	2	0.62	0.4539	1	0.0266	1.963		1	BTB-01461996	2	1	DOM	23/2	190/81	0.01915		1	BTB-01461996	2	1	REC	8/17	56/215	0.2055
1	BTA-10863-rs29016414	45773590	2	0.06	0.04059	1	0.4598	1.509		1	BTA-10863-rs29016414	2	1	DOM	3/22	22/249	0.4546		1	BTA-10863-rs29016414	2	1	REC	0/25	0/271	1
1	BTA-95262-no-rs	45793675	2	0.24	0.1181	1	0.02418	2.359		1	BTA-95262-no-rs	2	1	DOM	11/14	58/213	0.02283		1	BTA-95262-no-rs	2	1	REC	1/24	6/265	0.4644
1	BTB-01786029	45848413	2	0.3	0.2435	1	0.3935	1.331		1	BTB-01786029	2	1	DOM	15/10	112/159	0.09082		1	BTB-01786029	2	1	REC	0/25	20/251	0.393
1	BTA-14361-rs29023125	45897874	1	0.06	0.04059	2	0.4598	1.509		1	BTA-14361-rs29023125	1	2	DOM	3/22	22/249	0.4546		1	BTA-14361-rs29023125	1	2	REC	0/25	0/271	1
1	ARS-BFGL-NGS-114234	45929427	1	0.24	0.2019	2	0.5823	1.249		1	ARS-BFGL-NGS-114234	1	2	DOM	12/13	94/176	0.1976		1	ARS-BFGL-NGS-114234	1	2	REC	0/25	15/255	0.6249
1	BTA-89820-no-rs	45967602	2	0.32	0.452	1	0.07581	0.5705		1	BTA-89820-no-rs	2	1	DOM	15/10	184/87	0.5045		1	BTA-89820-no-rs	2	1	REC	1/24	61/210	0.03635
1	Hapmap60140-ss46526251	46016435	2	0.24	0.2056	1	0.5856	1.22		1	Hapmap60140-ss46526251	2	1	DOM	12/13	96/174	0.2777		1	Hapmap60140-ss46526251	2	1	REC	0/25	15/255	0.6249
1	BovineHD0100013189	46035686	1	0.25	0.2034	2	0.4579	1.305		1	BovineHD0100013189	1	2	DOM	12/12	92/171	0.1827		1	BovineHD0100013189	1	2	REC	0/24	15/248	0.6231
1	UA-IFASA-4106	46048751	2	0.32	0.4576	1	0.07401	0.5579		1	UA-IFASA-4106	2	1	DOM	15/10	187/84	0.3738		1	UA-IFASA-4106	2	1	REC	1/24	61/210	0.03635
1	BovineHD0100013198	46078837	2	0.24	0.2056	1	0.5856	1.22		1	BovineHD0100013198	2	1	DOM	12/13	95/175	0.2764		1	BovineHD0100013198	2	1	REC	0/25	16/254	0.3771
1	BTB-00468553	46082337	2	0.06	0.04059	1	0.4598	1.509		1	BTB-00468553	2	1	DOM	3/22	22/249	0.4546		1	BTB-00468553	2	1	REC	0/25	0/271	1
1	BovineHD0100013203	46103884	1	0.02083	0.06506	2	0.3475	0.3058		1	BovineHD0100013203	1	2	DOM	1/23	35/234	0.3311		1	BovineHD0100013203	1	2	REC	0/24	0/269	1
1	BovineHD0100013207	46124747	2	0.3542	0.4349	1	0.2916	0.7124		1	BovineHD0100013207	2	1	DOM	16/8	181/88	1		1	BovineHD0100013207	2	1	REC	1/23	53/216	0.0939
1	BTB-00468519	46202802	2	0.26	0.1734	1	0.1281	1.675		1	BTB-00468519	2	1	DOM	11/14	85/186	0.2632		1	BTB-00468519	2	1	REC	2/23	9/262	0.2356
1	ARS-BFGL-NGS-110320	46242001	1	0.32	0.3574	2	0.6457	0.8461		1	ARS-BFGL-NGS-110320	1	2	DOM	16/9	158/112	0.6742		1	ARS-BFGL-NGS-110320	1	2	REC	0/25	35/235	0.05459
1	ARS-BFGL-NGS-67684	46267521	2	0.28	0.2823	1	1	0.9887		1	ARS-BFGL-NGS-67684	2	1	DOM	14/11	128/143	0.4125		1	ARS-BFGL-NGS-67684	2	1	REC	0/25	25/246	0.1466
1	BTB-00468485	46294957	2	0.22	0.1218	1	0.07451	2.034		1	BTB-00468485	2	1	DOM	10/15	60/211	0.05177		1	BTB-00468485	2	1	REC	1/24	6/265	0.4644
1	BTB-00468476	46322462	1	0.36	0.3376	2	0.7565	1.103		1	BTB-00468476	1	2	DOM	14/11	152/119	1		1	BTB-00468476	1	2	REC	4/21	31/240	0.5148
1	BTB-01608930	46425212	1	0.44	0.3875	2	0.5451	1.242		1	BTB-01608930	1	2	DOM	15/10	169/102	0.8317		1	BTB-01608930	1	2	REC	7/18	41/230	0.1499
1	BovineHD0100013284	46452563	1	0.3958	0.4721	2	0.3657	0.7326		1	BovineHD0100013284	1	2	DOM	15/9	190/79	0.4858		1	BovineHD0100013284	1	2	REC	4/20	64/205	0.6142
1	BovineHD0100013290	46480170	2	0.3542	0.3309	1	0.7508	1.109		1	BovineHD0100013290	2	1	DOM	13/11	149/120	1		1	BovineHD0100013290	2	1	REC	4/20	29/240	0.3281
1	BTA-109011-no-rs	46575158	2	0.28	0.2196	1	0.3751	1.382		1	BTA-109011-no-rs	2	1	DOM	14/11	102/169	0.08732		1	BTA-109011-no-rs	2	1	REC	0/25	17/254	0.3773
1	Hapmap39710-BTA-108633	46659142	1	0.38	0.3727	2	1	1.032		1	Hapmap39710-BTA-108633	1	2	DOM	17/8	164/107	0.5257		1	Hapmap39710-BTA-108633	1	2	REC	2/23	38/233	0.5492
1	Hapmap54262-rs29018839	46735327	2	0.375	0.3829	1	1	0.967		1	Hapmap54262-rs29018839	2	1	DOM	15/9	169/100	1		1	Hapmap54262-rs29018839	2	1	REC	3/21	37/232	1
1	ARS-BFGL-NGS-41577	46756027	1	0.06	0.05904	2	1	1.017		1	ARS-BFGL-NGS-41577	1	2	DOM	3/22	29/242	0.7415		1	ARS-BFGL-NGS-41577	1	2	REC	0/25	3/268	1
1	BovineHD0100013379	46834727	2	0.2083	0.2193	1	1	0.9367		1	BovineHD0100013379	2	1	DOM	8/16	105/164	0.6656		1	BovineHD0100013379	2	1	REC	2/22	13/256	0.3525
1	ARS-BFGL-NGS-23106	46884964	2	0.06	0.02399	1	0.1453	2.597		1	ARS-BFGL-NGS-23106	2	1	DOM	3/22	12/259	0.1228		1	ARS-BFGL-NGS-23106	2	1	REC	0/25	1/270	1
1	BovineHD0100013407	46922216	1	0.5417	0.4796	2	0.4527	1.283		1	BovineHD0100013407	1	2	DOM	21/3	191/78	0.0979		1	BovineHD0100013407	1	2	REC	5/19	67/202	0.8068
1	BTA-99040-no-rs	46953687	2	0.04	0.02583	1	0.637	1.571		1	BTA-99040-no-rs	2	1	DOM	2/23	14/257	0.6337		1	BTA-99040-no-rs	2	1	REC	0/25	0/271	1
1	BovineHD0100013416	46963727	1	0.3958	0.3144	2	0.2605	1.429		1	BovineHD0100013416	1	2	DOM	17/7	136/128	0.08751		1	BovineHD0100013416	1	2	REC	2/22	30/234	1
1	ARS-BFGL-BAC-24524	47022790	2	0.32	0.2675	1	0.4111	1.288		1	ARS-BFGL-BAC-24524	2	1	DOM	14/11	122/149	0.3034		1	ARS-BFGL-BAC-24524	2	1	REC	2/23	23/248	1
1	Hapmap55429-rs29012753	47050759	2	0.28	0.2934	1	1	0.9368		1	Hapmap55429-rs29012753	2	1	DOM	12/13	133/138	1		1	Hapmap55429-rs29012753	2	1	REC	2/23	26/245	1
1	BTB-02090792	47079462	2	0.38	0.3007	1	0.2635	1.425		1	BTB-02090792	2	1	DOM	16/9	136/135	0.2137		1	BTB-02090792	2	1	REC	3/22	27/244	0.7282
1	BTB-01702372	47112713	2	0.1	0.06273	1	0.3633	1.66		1	BTB-01702372	2	1	DOM	5/20	31/240	0.2056		1	BTB-01702372	2	1	REC	0/25	3/268	1
1	BTB-01572184	47157644	1	0.24	0.1993	2	0.4667	1.269		1	BTB-01572184	1	2	DOM	11/14	96/175	0.3931		1	BTB-01572184	1	2	REC	1/24	12/259	1
1	Hapmap43751-BTA-104783	47185588	2	0.06	0.1052	1	0.4613	0.5431		1	Hapmap43751-BTA-104783	2	1	DOM	3/22	55/216	0.4335		1	Hapmap43751-BTA-104783	2	1	REC	0/25	2/269	1
1	BovineHD0100013469	47216446	2	0.06	0.1648	1	0.06406	0.3235		1	BovineHD0100013469	2	1	DOM	3/22	85/185	0.0419		1	BovineHD0100013469	2	1	REC	0/25	4/266	1
1	BTB-01967977	47302352	2	0.22	0.2232	1	1	0.9814		1	BTB-01967977	2	1	DOM	9/16	110/161	0.8316		1	BTB-01967977	2	1	REC	2/23	11/260	0.3017
1	BTB-01663516	47334486	2	0.14	0.1074	1	0.4783	1.353		1	BTB-01663516	2	1	DOM	6/19	54/216	0.6085		1	BTB-01663516	2	1	REC	1/24	4/266	0.3598
1	BovineHD0100013497	47357605	1	0.28	0.3759	2	0.2202	0.6456		1	BovineHD0100013497	1	2	DOM	12/13	161/109	0.292		1	BovineHD0100013497	1	2	REC	2/23	42/228	0.3943
1	Hapmap42068-BTA-111564	47378821	1	0.32	0.1863	2	0.03902	2.055		1	Hapmap42068-BTA-111564	1	2	DOM	13/12	93/178	0.08496		1	Hapmap42068-BTA-111564	1	2	REC	3/22	8/263	0.05592
1	BTB-01202368	47421211	1	0.3	0.2841	2	0.8701	1.08		1	BTB-01202368	1	2	DOM	15/10	132/139	0.3031		1	BTB-01202368	1	2	REC	0/25	22/249	0.2347
1	BTB-01202377	47439819	2	0.26	0.3672	1	0.165	0.6056		1	BTB-01202377	2	1	DOM	12/13	161/110	0.2938		1	BTB-01202377	2	1	REC	1/24	38/233	0.2209
1	BTA-122400-no-rs	47465147	2	0.34	0.4889	1	0.05382	0.5385		1	BTA-122400-no-rs	2	1	DOM	15/10	198/73	0.1691		1	BTA-122400-no-rs	2	1	REC	2/23	67/204	0.08073
1	Hapmap60003-rs29024905	47489244	2	0.42	0.2934	1	0.0765	1.744		1	Hapmap60003-rs29024905	2	1	DOM	15/10	134/137	0.4039		1	Hapmap60003-rs29024905	2	1	REC	6/19	25/246	0.03366
1	BTB-01202460	47578457	2	0.28	0.2694	1	0.8686	1.055		1	BTB-01202460	2	1	DOM	14/11	123/148	0.4023		1	BTB-01202460	2	1	REC	0/25	23/248	0.2369
1	BovineHD0100013544	47593505	2	0.08	0.1296	1	0.3791	0.5839		1	BovineHD0100013544	2	1	DOM	4/21	66/204	0.4634		1	BovineHD0100013544	2	1	REC	0/25	4/266	1
1	Hapmap27230-BTA-162491	47606699	2	0.44	0.4871	1	0.5567	0.8274		1	Hapmap27230-BTA-162491	2	1	DOM	18/7	202/69	0.8119		1	Hapmap27230-BTA-162491	2	1	REC	4/21	62/209	0.6158
1	ARS-BFGL-NGS-105365	47660239	1	0.02	0.07011	2	0.2381	0.2707		1	ARS-BFGL-NGS-105365	1	2	DOM	1/24	37/234	0.2219		1	ARS-BFGL-NGS-105365	1	2	REC	0/25	1/270	1
1	ARS-BFGL-NGS-73983	47740633	2	0.62	0.4705	1	0.05389	1.836		1	ARS-BFGL-NGS-73983	2	1	DOM	22/3	187/84	0.06403		1	ARS-BFGL-NGS-73983	2	1	REC	9/16	68/203	0.2395
1	ARS-BFGL-BAC-16973	47765383	2	0.46	0.393	1	0.3681	1.316		1	ARS-BFGL-BAC-16973	2	1	DOM	18/7	171/100	0.5146		1	ARS-BFGL-BAC-16973	2	1	REC	5/20	42/229	0.5676
1	Hapmap49948-BTA-29490	47815773	1	0.12	0.1181	2	1	1.018		1	Hapmap49948-BTA-29490	1	2	DOM	5/20	60/211	1		1	Hapmap49948-BTA-29490	1	2	REC	1/24	4/267	0.3588
1	ARS-BFGL-NGS-50906	47982861	1	0.32	0.3229	2	1	0.9869		1	ARS-BFGL-NGS-50906	1	2	DOM	15/10	144/127	0.5376		1	ARS-BFGL-NGS-50906	1	2	REC	1/24	31/240	0.4958
1	BovineHD0100013667	48012415	1	0.02083	0.05283	2	0.4994	0.3815		1	BovineHD0100013667	1	2	DOM	1/23	28/237	0.4872		1	BovineHD0100013667	1	2	REC	0/24	0/265	1
1	Hapmap59092-rs29024583	48061029	2	0.14	0.1808	1	0.5647	0.7375		1	Hapmap59092-rs29024583	2	1	DOM	7/18	89/182	0.8236		1	Hapmap59092-rs29024583	2	1	REC	0/25	9/262	1
1	BovineHD0100013692	48117247	1	0.18	0.1513	2	0.5435	1.231		1	BovineHD0100013692	1	2	DOM	8/17	76/195	0.6493		1	BovineHD0100013692	1	2	REC	1/24	6/265	0.4644
1	ARS-BFGL-NGS-41264	48157004	2	0.04	0.03321	1	0.6824	1.213		1	ARS-BFGL-NGS-41264	2	1	DOM	2/23	18/253	0.6807		1	ARS-BFGL-NGS-41264	2	1	REC	0/25	0/271	1
1	Hapmap38806-BTA-110152	48263748	2	0.1	0.1074	1	1	0.9234		1	Hapmap38806-BTA-110152	2	1	DOM	5/20	56/214	1		1	Hapmap38806-BTA-110152	2	1	REC	0/25	2/268	1
1	BovineHD0100013736	48268016	2	0.12	0.1222	1	1	0.9793		1	BovineHD0100013736	2	1	DOM	6/19	63/207	1		1	BovineHD0100013736	2	1	REC	0/25	3/267	1
1	BTB-01146938	48360337	1	0.44	0.3444	2	0.2153	1.495		1	BTB-01146938	1	2	DOM	17/8	150/120	0.293		1	BTB-01146938	1	2	REC	5/20	36/234	0.3643
1	BovineHD0100013762	48425332	2	0.1042	0.1623	1	0.4069	0.6003		1	BovineHD0100013762	2	1	DOM	5/19	77/188	0.4836		1	BovineHD0100013762	2	1	REC	0/24	9/256	1
1	BTB-01146838	48436492	1	0.34	0.369	2	0.7601	0.8809		1	BTB-01146838	1	2	DOM	16/9	165/106	0.8328		1	BTB-01146838	1	2	REC	1/24	35/236	0.334
1	Hapmap50572-BTA-113037	48500613	1	0.54	0.4317	2	0.1799	1.545		1	Hapmap50572-BTA-113037	1	2	DOM	19/6	176/95	0.378		1	Hapmap50572-BTA-113037	1	2	REC	8/17	58/213	0.2181
1	ARS-BFGL-NGS-83459	48538897	2	0.14	0.1328	1	0.8295	1.063		1	ARS-BFGL-NGS-83459	2	1	DOM	6/19	67/204	1		1	ARS-BFGL-NGS-83459	2	1	REC	1/24	5/266	0.4139
1	BovineHD0100013844	48713582	1	0.26	0.4204	2	0.03433	0.4845		1	BovineHD0100013844	1	2	DOM	12/13	173/97	0.1316		1	BovineHD0100013844	1	2	REC	1/24	54/216	0.05828
1	BovineHD0100013846	48715780	1	0.26	0.4204	2	0.03433	0.4845		1	BovineHD0100013846	1	2	DOM	12/13	173/97	0.1316		1	BovineHD0100013846	1	2	REC	1/24	54/216	0.05828
1	BovineHD0100013848	48724388	2	0.24	0.4264	1	0.01048	0.4248		1	BovineHD0100013848	2	1	DOM	11/14	172/93	0.05025		1	BovineHD0100013848	2	1	REC	1/24	54/211	0.05833
1	BovineHD0100013866	48752114	1	0.58	0.3947	2	0.01544	2.117		1	BovineHD0100013866	1	2	DOM	21/4	162/104	0.02875		1	BovineHD0100013866	1	2	REC	8/17	48/218	0.1098
1	BovineHD0100013867	48755603	2	0.28	0.1283	1	0.008958	2.642		1	BovineHD0100013867	2	1	DOM	11/14	61/204	0.0284		1	BovineHD0100013867	2	1	REC	3/22	7/258	0.04541
1	BTA-113021-no-rs	48823158	1	0.44	0.4667	2	0.7682	0.898		1	BTA-113021-no-rs	1	2	DOM	19/6	192/78	0.8171		1	BTA-113021-no-rs	1	2	REC	3/22	60/210	0.3115
1	BovineHD0100013906	48843312	1	0.3125	0.2224	2	0.1556	1.589		1	BovineHD0100013906	1	2	DOM	12/12	98/165	0.2732		1	BovineHD0100013906	1	2	REC	3/21	19/244	0.4105
1	BTB-01077379	48869448	2	0.42	0.4244	1	1	0.9823		1	BTB-01077379	2	1	DOM	19/6	178/93	0.3781		1	BTB-01077379	2	1	REC	2/23	52/219	0.2757
1	BovineHD0100013920	48904277	1	0.3	0.4436	2	0.05315	0.5375		1	BovineHD0100013920	1	2	DOM	14/11	180/86	0.2692		1	BovineHD0100013920	1	2	REC	1/24	56/210	0.03685
1	BTB-01077277	48906977	2	0.3	0.437	1	0.07252	0.5521		1	BTB-01077277	2	1	DOM	14/11	180/90	0.2804		1	BTB-01077277	2	1	REC	1/24	56/214	0.05934
1	Hapmap57446-rs29023998	48981871	2	0	0.03148	1	0.3847	0		1	Hapmap57446-rs29023998	2	1	DOM	0/25	17/253	0.3774		1	Hapmap57446-rs29023998	2	1	REC	0/25	0/270	1
1	BovineHD0100013943	49011657	2	0.32	0.5	1	0.01751	0.4706		1	BovineHD0100013943	2	1	DOM	15/10	195/73	0.2442		1	BovineHD0100013943	2	1	REC	1/24	73/195	0.007441
1	BTB-01615915	49314301	1	0.3	0.2657	2	0.6181	1.185		1	BTB-01615915	1	2	DOM	14/11	123/148	0.4023		1	BTB-01615915	1	2	REC	1/24	21/250	0.7062
1	BovineHD0100014023	49415050	1	0.4	0.4347	2	0.6577	0.867		1	BovineHD0100014023	1	2	DOM	18/7	185/83	0.825		1	BovineHD0100014023	1	2	REC	2/23	48/220	0.2737
1	BovineHD0100014048	49515972	2	0.26	0.2857	1	0.7461	0.8784		1	BovineHD0100014048	2	1	DOM	10/15	129/137	0.5308		1	BovineHD0100014048	2	1	REC	3/22	23/243	0.4774
1	BovineHD0100014053	49537293	2	0.2	0.1491	1	0.3116	1.427		1	BovineHD0100014053	2	1	DOM	9/16	71/194	0.3516		1	BovineHD0100014053	2	1	REC	1/24	8/257	0.561
1	BovineHD0100014063	49597814	2	0.22	0.2519	1	0.7333	0.8378		1	BovineHD0100014063	2	1	DOM	10/15	118/150	0.8337		1	BovineHD0100014063	2	1	REC	1/24	17/251	1
1	BovineHD0100014071	49634079	2	0.14	0.1748	1	0.695	0.7684		1	BovineHD0100014071	2	1	DOM	7/18	84/182	0.8237		1	BovineHD0100014071	2	1	REC	0/25	9/257	1
1	BTB-00132601	49688088	1	0.18	0.1926	2	1	0.9203		1	BTB-00132601	1	2	DOM	9/16	94/176	1		1	BTB-00132601	1	2	REC	0/25	10/260	1
1	BovineHD0100014103	49728052	1	0.12	0.1623	2	0.5456	0.704		1	BovineHD0100014103	1	2	DOM	6/19	80/185	0.6492		1	BovineHD0100014103	1	2	REC	0/25	6/259	1
1	ARS-BFGL-NGS-38261	49729236	2	0.4	0.3537	1	0.539	1.218		1	ARS-BFGL-NGS-38261	2	1	DOM	16/9	159/111	0.6756		1	ARS-BFGL-NGS-38261	2	1	REC	4/21	32/238	0.5243
1	ARS-BFGL-BAC-15402	49762136	1	0.28	0.19	2	0.1379	1.657		1	ARS-BFGL-BAC-15402	1	2	DOM	13/12	94/177	0.1259		1	ARS-BFGL-BAC-15402	1	2	REC	1/24	9/262	0.5921
1	BTB-00132817	49799340	1	0.4	0.3537	2	0.539	1.218		1	BTB-00132817	1	2	DOM	16/9	159/111	0.6756		1	BTB-00132817	1	2	REC	4/21	32/238	0.5243
1	BTB-01699628	49829799	2	0.12	0.163	1	0.546	0.7004		1	BTB-01699628	2	1	DOM	6/19	82/188	0.6493		1	BTB-01699628	2	1	REC	0/25	6/264	1
1	BTA-114651-no-rs	49851536	2	0.46	0.417	1	0.5536	1.191		1	BTA-114651-no-rs	2	1	DOM	18/7	181/90	0.6626		1	BTA-114651-no-rs	2	1	REC	5/20	45/226	0.5877
1	Hapmap41715-BTA-100026	49919784	2	0.16	0.1511	1	0.8376	1.07		1	Hapmap41715-BTA-100026	2	1	DOM	7/18	77/191	1		1	Hapmap41715-BTA-100026	2	1	REC	1/24	4/264	0.3618
1	BTB-00022097	50009545	2	0.2	0.1771	1	0.7001	1.161		1	BTB-00022097	2	1	DOM	9/16	89/182	0.8249		1	BTB-00022097	2	1	REC	1/24	7/264	0.5107
1	BTB-01165120	50064432	1	0.18	0.1241	2	0.269	1.55		1	BTB-01165120	1	2	DOM	8/17	64/202	0.4663		1	BTB-01165120	1	2	REC	1/24	2/264	0.237
1	Hapmap49829-BTA-101896	50173554	2	0.34	0.3463	1	1	0.9725		1	Hapmap49829-BTA-101896	2	1	DOM	16/9	154/116	0.5341		1	Hapmap49829-BTA-101896	2	1	REC	1/24	33/237	0.3312
1	BovineHD0100014237	50241095	2	0.1	0.08083	1	0.5919	1.264		1	BovineHD0100014237	2	1	DOM	4/21	42/224	1		1	BovineHD0100014237	2	1	REC	1/24	1/265	0.1647
1	BTB-01164952	50252416	1	0.06	0.06111	2	1	0.9807		1	BTB-01164952	1	2	DOM	3/22	33/237	1		1	BTB-01164952	1	2	REC	0/25	0/270	1
1	BTB-01164946	50279694	2	0.56	0.4704	1	0.2394	1.433		1	BTB-01164946	2	1	DOM	20/5	191/79	0.4869		1	BTB-01164946	2	1	REC	8/17	63/207	0.3338
1	BTB-01164879	50375545	2	0.1	0.09815	1	1	1.021		1	BTB-01164879	2	1	DOM	5/20	49/221	0.7892		1	BTB-01164879	2	1	REC	0/25	4/266	1
1	BTB-00022352	50415732	1	0.18	0.1074	2	0.1571	1.824		1	BTB-00022352	1	2	DOM	7/18	53/217	0.3072		1	BTB-00022352	1	2	REC	2/23	5/265	0.1113
1	BovineHD0100014288	50443160	1	0.44	0.4111	2	0.7644	1.125		1	BovineHD0100014288	1	2	DOM	17/8	171/99	0.8283		1	BovineHD0100014288	1	2	REC	5/20	51/219	0.796
1	BTB-00022376	50457230	1	0.06	0.07963	2	0.7873	0.7378		1	BTB-00022376	1	2	DOM	3/22	41/229	1		1	BTB-00022376	1	2	REC	0/25	2/268	1
1	Hapmap41716-BTA-100042	50484660	1	0.24	0.2823	2	0.622	0.8029		1	Hapmap41716-BTA-100042	1	2	DOM	10/15	132/139	0.5311		1	Hapmap41716-BTA-100042	1	2	REC	2/23	21/250	1
1	BovineHD0100014306	50493683	2	0.24	0.2906	1	0.5152	0.771		1	BovineHD0100014306	2	1	DOM	10/15	133/132	0.4044		1	BovineHD0100014306	2	1	REC	2/23	21/244	1
1	BovineHD0100014307	50494779	2	0.24	0.2822	1	0.6216	0.8032		1	BovineHD0100014307	2	1	DOM	10/15	128/136	0.5307		1	BovineHD0100014307	2	1	REC	2/23	21/243	1
1	ARS-BFGL-NGS-101533	50631100	2	0.44	0.4	1	0.6517	1.179		1	ARS-BFGL-NGS-101533	2	1	DOM	19/6	165/105	0.1951		1	ARS-BFGL-NGS-101533	2	1	REC	3/22	51/219	0.5888
1	BovineHD0100014362	50665945	2	0.46	0.3667	1	0.222	1.471		1	BovineHD0100014362	2	1	DOM	18/7	154/116	0.203		1	BovineHD0100014362	2	1	REC	5/20	44/226	0.5815
1	ARS-BFGL-NGS-6521	50767507	2	0.04	0.02778	1	0.6478	1.458		1	ARS-BFGL-NGS-6521	2	1	DOM	2/23	15/255	0.6448		1	ARS-BFGL-NGS-6521	2	1	REC	0/25	0/270	1
1	ARS-BFGL-NGS-14638	50809694	2	0.04	0.09142	1	0.2974	0.4141		1	ARS-BFGL-NGS-14638	2	1	DOM	2/23	47/221	0.2755		1	ARS-BFGL-NGS-14638	2	1	REC	0/25	2/266	1
1	Hapmap42747-BTA-97910	50856429	2	0.38	0.3303	1	0.5313	1.243		1	Hapmap42747-BTA-97910	2	1	DOM	15/10	151/120	0.8337		1	Hapmap42747-BTA-97910	2	1	REC	4/21	28/243	0.3283
1	BTB-00184675	50886644	2	0.2	0.2332	1	0.7259	0.822		1	BTB-00184675	2	1	DOM	9/16	112/156	0.6734		1	BTB-00184675	2	1	REC	1/24	13/255	1
1	ARS-BFGL-NGS-27696	50927543	2	0.08	0.06852	1	0.7692	1.182		1	ARS-BFGL-NGS-27696	2	1	DOM	4/21	36/234	0.7588		1	ARS-BFGL-NGS-27696	2	1	REC	0/25	1/269	1
1	ARS-BFGL-NGS-15670	50974257	2	0.36	0.4207	1	0.4552	0.7747		1	ARS-BFGL-NGS-15670	2	1	DOM	17/8	178/93	1		1	ARS-BFGL-NGS-15670	2	1	REC	1/24	50/221	0.09316
1	BovineHD0100014436	50978540	1	0.34	0.2593	2	0.2416	1.471		1	BovineHD0100014436	1	2	DOM	15/10	116/152	0.1406		1	BovineHD0100014436	1	2	REC	2/23	23/245	1
1	BTB-01661970	51001448	2	0.34	0.4241	1	0.2947	0.6996		1	BTB-01661970	2	1	DOM	15/10	181/89	0.5099		1	BTB-01661970	2	1	REC	2/23	48/222	0.2743
1	BovineHD0100014490	51157870	1	0.44	0.5	2	0.4611	0.7857		1	BovineHD0100014490	1	2	DOM	18/7	200/65	0.8087		1	BovineHD0100014490	1	2	REC	4/21	65/200	0.463
1	ARS-BFGL-NGS-80227	51199296	2	0.4	0.4982	1	0.2367	0.6716		1	ARS-BFGL-NGS-80227	2	1	DOM	18/7	205/66	0.636		1	ARS-BFGL-NGS-80227	2	1	REC	2/23	65/206	0.08078
1	BovineHD0100014505	51226374	1	0.34	0.2387	2	0.1236	1.643		1	BovineHD0100014505	1	2	DOM	15/10	113/153	0.0972		1	BovineHD0100014505	1	2	REC	2/23	14/252	0.6363
1	BTB-01303321	51253635	1	0.14	0.1241	2	0.661	1.149		1	BTB-01303321	1	2	DOM	7/18	64/206	0.6284		1	BTB-01303321	1	2	REC	0/25	3/267	1
1	UA-IFASA-6260	51319043	2	0.16	0.1698	1	1	0.9314		1	UA-IFASA-6260	2	1	DOM	7/18	82/186	1		1	UA-IFASA-6260	2	1	REC	1/24	9/259	0.5961
1	Hapmap54644-rs29022483	51443154	1	0.34	0.2944	2	0.5197	1.234		1	Hapmap54644-rs29022483	1	2	DOM	15/10	130/140	0.2992		1	Hapmap54644-rs29022483	1	2	REC	2/23	29/241	1
1	BTA-100081-no-rs	51501180	2	0.32	0.2759	1	0.5123	1.235		1	BTA-100081-no-rs	2	1	DOM	15/10	123/147	0.2094		1	BTA-100081-no-rs	2	1	REC	1/24	26/244	0.7133
1	BovineHD0100014595	51600068	2	0.06	0.109	1	0.3434	0.5216		1	BovineHD0100014595	2	1	DOM	3/22	55/211	0.4332		1	BovineHD0100014595	2	1	REC	0/25	3/263	1
1	BTA-100076-no-rs	51629454	2	0.38	0.286	1	0.1937	1.53		1	BTA-100076-no-rs	2	1	DOM	16/9	133/138	0.2094		1	BTA-100076-no-rs	2	1	REC	3/22	22/249	0.4546
1	ARS-BFGL-NGS-29536	51674103	1	0.34	0.3247	2	0.875	1.071		1	ARS-BFGL-NGS-29536	1	2	DOM	14/11	146/125	1		1	ARS-BFGL-NGS-29536	1	2	REC	3/22	30/241	0.7488
1	ARS-BFGL-NGS-26781	51729431	2	0.16	0.2037	1	0.58	0.7446		1	ARS-BFGL-NGS-26781	2	1	DOM	8/17	99/171	0.8283		1	ARS-BFGL-NGS-26781	2	1	REC	0/25	11/259	0.6077
1	BTA-27925-no-rs	51785197	1	0.32	0.25	2	0.3092	1.412		1	BTA-27925-no-rs	1	2	DOM	13/12	116/152	0.4089		1	BTA-27925-no-rs	1	2	REC	3/22	18/250	0.4045
1	BovineHD0100014666	51793463	1	0.36	0.3139	2	0.5267	1.229		1	BovineHD0100014666	1	2	DOM	16/9	137/129	0.2959		1	BovineHD0100014666	1	2	REC	2/23	30/236	1
1	Hapmap23148-BTA-123974	51845190	2	0.16	0.2611	1	0.128	0.539		1	Hapmap23148-BTA-123974	2	1	DOM	7/18	125/145	0.09383		1	Hapmap23148-BTA-123974	2	1	REC	1/24	16/254	1
1	BovineHD0100014707	51942049	1	0.38	0.3528	2	0.7577	1.124		1	BovineHD0100014707	1	2	DOM	18/7	156/109	0.2854		1	BovineHD0100014707	1	2	REC	1/24	31/234	0.3322
1	BovineHD0100014714	51960243	2	0.0625	0.07008	1	1	0.8847		1	BovineHD0100014714	2	1	DOM	3/21	36/228	1		1	BovineHD0100014714	2	1	REC	0/24	1/263	1
1	UA-IFASA-5103	51980212	1	0.44	0.3616	2	0.2858	1.387		1	UA-IFASA-5103	1	2	DOM	19/6	157/114	0.09068		1	UA-IFASA-5103	1	2	REC	3/22	39/232	1
1	ARS-BFGL-NGS-105123	52001408	1	0.36	0.2944	2	0.3364	1.348		1	ARS-BFGL-NGS-105123	1	2	DOM	15/10	135/135	0.4054		1	ARS-BFGL-NGS-105123	1	2	REC	3/22	24/246	0.4881
1	ARS-BFGL-NGS-17305	52078062	1	0.04	0.009328	2	0.1136	4.425		1	ARS-BFGL-NGS-17305	1	2	DOM	2/23	5/263	0.1126		1	ARS-BFGL-NGS-17305	1	2	REC	0/25	0/268	1
1	Hapmap42392-BTA-100065	52121657	1	0.28	0.213	2	0.2844	1.437		1	Hapmap42392-BTA-100065	1	2	DOM	12/13	102/168	0.391		1	Hapmap42392-BTA-100065	1	2	REC	2/23	13/257	0.3689
1	ARS-BFGL-NGS-112553	52229363	2	0.12	0.1333	1	1	0.8864		1	ARS-BFGL-NGS-112553	2	1	DOM	6/19	68/202	1		1	ARS-BFGL-NGS-112553	2	1	REC	0/25	4/266	1
1	BTA-100060-no-rs	52260898	1	0.16	0.2093	2	0.4691	0.7198		1	BTA-100060-no-rs	1	2	DOM	8/17	105/165	0.6678		1	BTA-100060-no-rs	1	2	REC	0/25	8/262	1
1	BTA-100058-no-rs	52304155	2	0.4	0.413	1	0.882	0.9477		1	BTA-100058-no-rs	2	1	DOM	16/9	181/89	0.8251		1	BTA-100058-no-rs	2	1	REC	4/21	42/228	1
1	BovineHD0100014814	52357886	1	0.42	0.3741	2	0.5438	1.212		1	BovineHD0100014814	1	2	DOM	18/7	161/105	0.2905		1	BovineHD0100014814	1	2	REC	3/22	38/228	1
1	BovineHD0100014824	52376933	1	0.12	0.1093	2	0.8131	1.112		1	BovineHD0100014824	1	2	DOM	6/19	58/212	0.8004		1	BovineHD0100014824	1	2	REC	0/25	1/269	1
1	BTA-120739-no-rs	52386165	2	0.22	0.2	1	0.7144	1.128		1	BTA-120739-no-rs	2	1	DOM	9/16	100/170	1		1	BTA-120739-no-rs	2	1	REC	2/23	8/262	0.204
1	BovineHD0100014833	52401002	2	0.4375	0.5	1	0.4526	0.7778		1	BovineHD0100014833	2	1	DOM	18/6	201/63	1		1	BovineHD0100014833	2	1	REC	3/21	63/201	0.3094
1	ARS-BFGL-NGS-89588	52418784	2	0.22	0.2417	1	0.863	0.8849		1	ARS-BFGL-NGS-89588	2	1	DOM	9/16	119/152	0.5296		1	ARS-BFGL-NGS-89588	2	1	REC	2/23	12/259	0.3347
1	BTB-00026002	52459222	1	0.2	0.2232	2	0.8589	0.8698		1	BTB-00026002	1	2	DOM	8/17	109/162	0.5233		1	BTB-00026002	1	2	REC	2/23	12/259	0.3347
1	ARS-BFGL-NGS-76469	52536112	1	0.52	0.4704	2	0.5549	1.22		1	ARS-BFGL-NGS-76469	1	2	DOM	22/3	197/73	0.1492		1	ARS-BFGL-NGS-76469	1	2	REC	4/21	57/213	0.7962
1	BovineHD0100014899	52543921	2	0.38	0.3736	1	1	1.028		1	BovineHD0100014899	2	1	DOM	18/7	161/104	0.2921		1	BovineHD0100014899	2	1	REC	1/24	37/228	0.2205
1	BovineHD0100014918	52602161	1	0.56	0.4179	2	0.07218	1.773		1	BovineHD0100014918	1	2	DOM	22/3	175/93	0.02436		1	BovineHD0100014918	1	2	REC	6/19	49/219	0.4345
1	Hapmap27147-BTA-124015	52668291	1	0.14	0.2019	2	0.3551	0.6437		1	Hapmap27147-BTA-124015	1	2	DOM	7/18	100/170	0.5147		1	Hapmap27147-BTA-124015	1	2	REC	0/25	9/261	1
1	Hapmap24136-BTA-124014	52692977	2	0.56	0.4815	1	0.3041	1.37		1	Hapmap24136-BTA-124014	2	1	DOM	23/2	200/71	0.05108		1	Hapmap24136-BTA-124014	2	1	REC	5/20	61/210	1
1	BovineHD0100014953	52773325	1	0.36	0.3806	2	0.8791	0.9154		1	BovineHD0100014953	1	2	DOM	15/10	170/98	0.829		1	BovineHD0100014953	1	2	REC	3/22	34/234	1
1	BovineHD0100014988	52848948	1	0.26	0.265	2	1	0.9743		1	BovineHD0100014988	1	2	DOM	12/13	126/140	1		1	BovineHD0100014988	1	2	REC	1/24	15/251	1
1	Hapmap47502-BTA-110302	52854500	2	0.12	0.1494	1	0.6803	0.7761		1	Hapmap47502-BTA-110302	2	1	DOM	6/19	75/196	0.8171		1	Hapmap47502-BTA-110302	2	1	REC	0/25	6/265	1
1	BovineHD0100014992	52855378	2	0.12	0.1523	1	0.6797	0.7593		1	BovineHD0100014992	2	1	DOM	6/19	75/191	0.8166		1	BovineHD0100014992	2	1	REC	0/25	6/260	1
1	BovineHD0100015002	52889663	2	0.04	0.09074	1	0.2975	0.4175		1	BovineHD0100015002	2	1	DOM	1/24	48/222	0.09282		1	BovineHD0100015002	2	1	REC	1/24	1/269	0.1626
1	BTB-00025197	52972214	1	0.4	0.3537	2	0.539	1.218		1	BTB-00025197	1	2	DOM	18/7	152/118	0.1437		1	BTB-00025197	1	2	REC	2/23	39/231	0.5489
1	BovineHD0100015037	52999235	1	0.04	0.09211	2	0.2973	0.4107		1	BovineHD0100015037	1	2	DOM	1/24	48/218	0.09244		1	BovineHD0100015037	1	2	REC	1/24	1/265	0.1647
1	BTB-00025135	53112780	2	0.04	0.06296	1	0.7588	0.6201		1	BTB-00025135	2	1	DOM	1/24	34/236	0.332		1	BTB-00025135	2	1	REC	1/24	0/270	0.08475
1	Hapmap47174-BTA-110289	53135919	2	0.12	0.1185	1	1	1.014		1	Hapmap47174-BTA-110289	2	1	DOM	6/19	63/207	1		1	Hapmap47174-BTA-110289	2	1	REC	0/25	1/269	1
1	BTA-110282-no-rs	53167139	2	0.32	0.2389	1	0.229	1.499		1	BTA-110282-no-rs	2	1	DOM	14/11	111/159	0.2037		1	BTA-110282-no-rs	2	1	REC	2/23	18/252	0.6816
1	ARS-BFGL-NGS-18743	53214714	2	0.4	0.3653	1	0.6475	1.158		1	ARS-BFGL-NGS-18743	2	1	DOM	18/7	161/110	0.2861		1	ARS-BFGL-NGS-18743	2	1	REC	2/23	37/234	0.5505
1	Hapmap53221-rs29019635	53551793	2	0.4	0.3489	1	0.5363	1.244		1	Hapmap53221-rs29019635	2	1	DOM	18/7	155/113	0.2047		1	Hapmap53221-rs29019635	2	1	REC	2/23	32/236	0.7506
1	Hapmap57738-rs29023662	53578419	2	0.26	0.1586	1	0.07484	1.864		1	Hapmap57738-rs29023662	2	1	DOM	12/13	77/191	0.06647		1	Hapmap57738-rs29023662	2	1	REC	1/24	8/260	0.5571
1	Hapmap48975-BTA-99363	53615323	2	0.22	0.2519	1	0.7334	0.8379		1	Hapmap48975-BTA-99363	2	1	DOM	10/15	125/145	0.6757		1	Hapmap48975-BTA-99363	2	1	REC	1/24	11/259	1
1	BovineHD0100015213	53617929	2	0.6	0.4173	1	0.01637	2.095		1	BovineHD0100015213	2	1	DOM	23/2	173/93	0.006192		1	BovineHD0100015213	2	1	REC	7/18	49/217	0.2863
1	ARS-BFGL-BAC-20881	53635724	1	0.34	0.2926	2	0.5181	1.245		1	ARS-BFGL-BAC-20881	1	2	DOM	16/9	129/141	0.1449		1	ARS-BFGL-BAC-20881	1	2	REC	1/24	29/241	0.4892
1	Hapmap61117-rs29023044	53657839	1	0.3	0.2722	2	0.7405	1.146		1	Hapmap61117-rs29023044	1	2	DOM	14/11	127/143	0.4107		1	Hapmap61117-rs29023044	1	2	REC	1/24	20/250	1
1	BovineHD0100015234	53682452	2	0.3	0.2717	1	0.7402	1.149		1	BovineHD0100015234	2	1	DOM	14/11	125/140	0.4116		1	BovineHD0100015234	2	1	REC	1/24	19/246	1
1	BovineHD0100015235	53683724	2	0.3	0.2632	1	0.616	1.2		1	BovineHD0100015235	2	1	DOM	14/11	123/143	0.4049		1	BovineHD0100015235	2	1	REC	1/24	17/249	1
1	BovineHD0100015236	53684659	1	0.3	0.2632	2	0.616	1.2		1	BovineHD0100015236	1	2	DOM	14/11	123/143	0.4049		1	BovineHD0100015236	1	2	REC	1/24	17/249	1
1	BTB-00026752	53685613	2	0.34	0.2934	1	0.5188	1.241		1	BTB-00026752	2	1	DOM	16/9	130/141	0.146		1	BTB-00026752	2	1	REC	1/24	29/242	0.4891
1	ARS-BFGL-NGS-106380	53713808	1	0.34	0.2657	2	0.2503	1.424		1	ARS-BFGL-NGS-106380	1	2	DOM	15/10	125/146	0.2124		1	ARS-BFGL-NGS-106380	1	2	REC	2/23	19/252	0.6939
1	BovineHD0100015260	53749809	2	0.36	0.344	1	0.8766	1.073		1	BovineHD0100015260	2	1	DOM	17/8	149/117	0.2944		1	BovineHD0100015260	2	1	REC	1/24	34/232	0.3326
1	BovineHD0100015261	53750481	2	0.42	0.438	1	0.8819	0.9293		1	BovineHD0100015261	2	1	DOM	18/7	183/83	0.8244		1	BovineHD0100015261	2	1	REC	3/22	50/216	0.5883
1	BTB-00026585	53760822	1	0	0.03321	2	0.3876	0		1	BTB-00026585	1	2	DOM	0/25	18/253	0.3802		1	BTB-00026585	1	2	REC	0/25	0/271	1
1	BTA-110335-no-rs	53841380	2	0.42	0.393	1	0.763	1.119		1	BTA-110335-no-rs	2	1	DOM	19/6	167/104	0.196		1	BTA-110335-no-rs	2	1	REC	2/23	46/225	0.3934
1	Hapmap38807-BTA-110324	53899179	2	0.38	0.3432	1	0.6421	1.173		1	Hapmap38807-BTA-110324	2	1	DOM	18/7	151/120	0.141		1	Hapmap38807-BTA-110324	2	1	REC	1/24	35/236	0.334
1	ARS-BFGL-NGS-40967	53953481	2	0.4	0.417	1	0.8814	0.9322		1	ARS-BFGL-NGS-40967	2	1	DOM	18/7	177/94	0.66		1	ARS-BFGL-NGS-40967	2	1	REC	2/23	49/222	0.2734
1	Hapmap42092-BTA-119864	54101343	1	0.1	0.1255	2	0.8218	0.7745		1	Hapmap42092-BTA-119864	1	2	DOM	5/20	66/205	0.8077		1	Hapmap42092-BTA-119864	1	2	REC	0/25	2/269	1
1	ARS-BFGL-NGS-114712	54134361	2	0.46	0.441	1	0.8819	1.08		1	ARS-BFGL-NGS-114712	2	1	DOM	19/6	185/86	0.5039		1	ARS-BFGL-NGS-114712	2	1	REC	4/21	54/217	0.7953
1	BovineHD0100015376	54170162	2	0.08	0.1426	1	0.2844	0.5229		1	BovineHD0100015376	2	1	DOM	3/22	70/200	0.1498		1	BovineHD0100015376	2	1	REC	1/24	7/263	0.512
1	Hapmap49009-BTA-107212	54263653	2	0.18	0.1974	1	0.8542	0.8924		1	Hapmap49009-BTA-107212	2	1	DOM	9/16	98/173	1		1	Hapmap49009-BTA-107212	2	1	REC	0/25	9/262	1
1	BovineHD0100015401	54273282	2	0.22	0.1852	1	0.5705	1.241		1	BovineHD0100015401	2	1	DOM	10/15	86/184	0.5035		1	BovineHD0100015401	2	1	REC	1/24	14/256	1
1	ARS-BFGL-NGS-43783	54347232	2	0.26	0.2343	1	0.728	1.148		1	ARS-BFGL-NGS-43783	2	1	DOM	11/14	114/157	0.8363		1	ARS-BFGL-NGS-43783	2	1	REC	2/23	13/258	0.3673
1	BovineHD0100015437	54394177	1	0.2	0.145	2	0.3008	1.474		1	BovineHD0100015437	1	2	DOM	9/16	73/196	0.356		1	BovineHD0100015437	1	2	REC	1/24	5/264	0.4161
1	BTB-01712147	54417168	2	0.3	0.3616	1	0.4421	0.7566		1	BTB-01712147	2	1	DOM	13/12	162/109	0.5251		1	BTB-01712147	2	1	REC	2/23	34/237	0.7508
1	BTB-01315615	54445733	2	0	0.01476	1	1	0		1	BTB-01315615	2	1	DOM	0/25	8/263	1		1	BTB-01315615	2	1	REC	0/25	0/271	1
1	BovineHD0100015457	54450675	2	0.26	0.1685	1	0.1197	1.734		1	BovineHD0100015457	2	1	DOM	12/13	83/187	0.115		1	BovineHD0100015457	2	1	REC	1/24	8/262	0.5545
1	BTA-21826-no-rs	54530063	2	0.54	0.4151	1	0.1005	1.654		1	BTA-21826-no-rs	2	1	DOM	21/4	176/95	0.07444		1	BTA-21826-no-rs	2	1	REC	6/19	49/222	0.43
1	ARS-BFGL-NGS-86970	54568552	2	0.22	0.09779	1	0.01474	2.602		1	ARS-BFGL-NGS-86970	2	1	DOM	10/15	52/219	0.0208		1	ARS-BFGL-NGS-86970	2	1	REC	1/24	1/270	0.162
1	BTB-01315516	54638306	1	0.24	0.2232	2	0.8594	1.099		1	BTB-01315516	1	2	DOM	12/13	106/165	0.4003		1	BTB-01315516	1	2	REC	0/25	15/256	0.6246
1	BovineHD0100015507	54652115	2	0.34	0.3481	1	1	0.9645		1	BovineHD0100015507	2	1	DOM	16/9	153/117	0.5319		1	BovineHD0100015507	2	1	REC	1/24	35/235	0.3342
1	Hapmap47540-BTA-21819	54688405	1	0.36	0.4557	2	0.2346	0.6718		1	Hapmap47540-BTA-21819	1	2	DOM	16/9	189/82	0.6509		1	Hapmap47540-BTA-21819	1	2	REC	2/23	58/213	0.1262
1	Hapmap39813-BTA-21834	54732278	2	0.3	0.2786	1	0.7437	1.11		1	Hapmap39813-BTA-21834	2	1	DOM	14/11	129/142	0.5313		1	Hapmap39813-BTA-21834	2	1	REC	1/24	22/249	0.7052
1	BTB-01315457	54755430	2	0.26	0.3173	1	0.431	0.7558		1	BTB-01315457	2	1	DOM	12/13	148/123	0.5374		1	BTB-01315457	2	1	REC	1/24	24/247	0.7069
1	BovineHD0100015543	54797676	1	0.32	0.3579	2	0.6455	0.8441		1	BovineHD0100015543	1	2	DOM	14/11	161/110	0.8324		1	BovineHD0100015543	1	2	REC	2/23	33/238	0.7505
1	Hapmap51652-BTA-89898	54843886	2	0.02	0.01845	1	1	1.086		1	Hapmap51652-BTA-89898	2	1	DOM	1/24	10/261	1		1	Hapmap51652-BTA-89898	2	1	REC	0/25	0/271	1
1	BTB-01131103	54870276	2	0.36	0.4207	1	0.4552	0.7747		1	BTB-01131103	2	1	DOM	16/9	182/89	0.8249		1	BTB-01131103	2	1	REC	2/23	46/225	0.3934
1	Hapmap49383-BTA-93867	54908193	2	0.28	0.2574	1	0.7369	1.122		1	Hapmap49383-BTA-93867	2	1	DOM	13/12	120/150	0.5313		1	Hapmap49383-BTA-93867	2	1	REC	1/24	19/251	1
1	BTB-01131178	54941210	2	0.06	0.1015	1	0.46	0.5652		1	BTB-01131178	2	1	DOM	3/22	54/217	0.4342		1	BTB-01131178	2	1	REC	0/25	1/270	1
1	BTA-93863-no-rs	54969062	1	0.42	0.3852	2	0.6509	1.156		1	BTA-93863-no-rs	1	2	DOM	16/9	167/103	1		1	BTA-93863-no-rs	1	2	REC	5/20	41/229	0.5631
1	ARS-BFGL-BAC-32896	55026335	2	0.46	0.4201	1	0.6541	1.176		1	ARS-BFGL-BAC-32896	2	1	DOM	17/8	181/88	1		1	ARS-BFGL-BAC-32896	2	1	REC	6/19	45/224	0.4053
1	Hapmap38361-BTA-93866	55051389	2	0.1	0.1389	1	0.5243	0.6889		1	Hapmap38361-BTA-93866	2	1	DOM	5/20	72/198	0.635		1	Hapmap38361-BTA-93866	2	1	REC	0/25	3/267	1
1	BTB-01131384	55079792	1	0.04	0.04982	2	1	0.7948		1	BTB-01131384	1	2	DOM	2/23	27/244	1		1	BTB-01131384	1	2	REC	0/25	0/271	1
1	BTB-01914655	55130499	2	0.46	0.4185	1	0.6538	1.184		1	BTB-01914655	2	1	DOM	17/8	181/89	1		1	BTB-01914655	2	1	REC	6/19	45/225	0.4044
1	BovineHD0100015649	55258490	1	0.38	0.4742	2	0.2366	0.6797		1	BovineHD0100015649	1	2	DOM	17/8	199/72	0.6381		1	BovineHD0100015649	1	2	REC	2/23	58/213	0.1262
1	BovineHD0100015656	55291541	1	0.24	0.137	2	0.05863	1.989		1	BovineHD0100015656	1	2	DOM	11/14	71/199	0.06546		1	BovineHD0100015656	1	2	REC	1/24	3/267	0.2996
1	ARS-BFGL-NGS-115305	55369328	1	0.2	0.1352	2	0.2048	1.599		1	ARS-BFGL-NGS-115305	1	2	DOM	9/16	67/203	0.2355		1	ARS-BFGL-NGS-115305	1	2	REC	1/24	6/264	0.4656
1	Hapmap32092-BTA-149957	55395795	1	0.36	0.2989	2	0.4218	1.319		1	Hapmap32092-BTA-149957	1	2	DOM	16/9	139/132	0.2958		1	Hapmap32092-BTA-149957	1	2	REC	2/23	23/248	1
1	ARS-BFGL-NGS-85105	55417768	1	0.6	0.4686	2	0.07807	1.701		1	ARS-BFGL-NGS-85105	1	2	DOM	23/2	195/76	0.03165		1	ARS-BFGL-NGS-85105	1	2	REC	7/18	59/212	0.4581
1	BovineHD0100015703	55476049	1	0.22	0.3007	2	0.2594	0.6558		1	BovineHD0100015703	1	2	DOM	10/15	140/131	0.3004		1	BovineHD0100015703	1	2	REC	1/24	23/248	0.7055
1	Hapmap47445-BTA-93870	55515620	1	0.5	0.342	2	0.03049	1.924		1	Hapmap47445-BTA-93870	1	2	DOM	20/5	152/117	0.03207		1	Hapmap47445-BTA-93870	1	2	REC	5/20	32/237	0.2207
1	Hapmap33225-BTA-151395	55580815	1	0.12	0.1771	2	0.4326	0.6335		1	Hapmap33225-BTA-151395	1	2	DOM	5/20	88/183	0.2618		1	Hapmap33225-BTA-151395	1	2	REC	1/24	8/263	0.5532
1	BovineHD4100000306	55595254	2	0.375	0.3377	1	0.6346	1.177		1	BovineHD4100000306	2	1	DOM	16/8	146/122	0.2888		1	BovineHD4100000306	2	1	REC	2/22	35/233	0.7504
1	BovineHD0100015754	55616621	2	0.4	0.4004	1	1	0.9985		1	BovineHD0100015754	2	1	DOM	17/8	169/102	0.6687		1	BovineHD0100015754	2	1	REC	3/22	48/223	0.5893
1	ARS-BFGL-NGS-39684	55670650	1	0	0.03321	2	0.3876	0		1	ARS-BFGL-NGS-39684	1	2	DOM	0/25	18/253	0.3802		1	ARS-BFGL-NGS-39684	1	2	REC	0/25	0/271	1
1	Hapmap43173-BTA-120253	55779057	1	0.28	0.3395	2	0.4369	0.7566		1	Hapmap43173-BTA-120253	1	2	DOM	13/12	157/114	0.6734		1	Hapmap43173-BTA-120253	1	2	REC	1/24	27/244	0.4882
1	BovineHD0100015822	55837262	1	0.42	0.4963	2	0.3752	0.7349		1	BovineHD0100015822	1	2	DOM	16/9	199/71	0.3468		1	BovineHD0100015822	1	2	REC	5/20	69/201	0.6364
1	BTA-25876-no-rs	56134816	2	0.34	0.3796	1	0.6487	0.8418		1	BTA-25876-no-rs	2	1	DOM	14/11	164/106	0.6728		1	BTA-25876-no-rs	2	1	REC	3/22	41/229	1
1	BovineHD0100015894	56151365	2	0.52	0.4428	1	0.3024	1.363		1	BovineHD0100015894	2	1	DOM	18/7	183/88	0.8234		1	BovineHD0100015894	2	1	REC	8/17	57/214	0.2115
1	ARS-BFGL-NGS-97046	56196281	1	0.52	0.4317	2	0.2371	1.426		1	ARS-BFGL-NGS-97046	1	2	DOM	18/7	181/90	0.6626		1	ARS-BFGL-NGS-97046	1	2	REC	8/17	53/218	0.1923
1	BTA-25809-no-rs	56253478	2	0.4	0.4815	1	0.3019	0.7178		1	BTA-25809-no-rs	2	1	DOM	15/10	199/72	0.1644		1	BTA-25809-no-rs	2	1	REC	5/20	62/209	1
1	ARS-BFGL-NGS-38890	56446383	2	0.06	0.131	1	0.182	0.4234		1	ARS-BFGL-NGS-38890	2	1	DOM	3/22	67/204	0.2181		1	ARS-BFGL-NGS-38890	2	1	REC	0/25	4/267	1
1	ARS-BFGL-NGS-59270	56483517	2	0.04	0.1661	1	0.01397	0.2093		1	ARS-BFGL-NGS-59270	2	1	DOM	2/23	82/189	0.01895		1	ARS-BFGL-NGS-59270	2	1	REC	0/25	8/263	1
1	BovineHD0100016081	56504825	1	0.32	0.3704	2	0.5413	0.8		1	BovineHD0100016081	1	2	DOM	15/10	163/107	1		1	BovineHD0100016081	1	2	REC	1/24	37/233	0.2216
1	ARS-BFGL-NGS-15221	56564301	1	0.02	0.01661	2	0.5891	1.209		1	ARS-BFGL-NGS-15221	1	2	DOM	1/24	9/262	0.5921		1	ARS-BFGL-NGS-15221	1	2	REC	0/25	0/271	1
1	ARS-BFGL-NGS-52696	56632142	1	0.08	0.1292	2	0.3794	0.5863		1	ARS-BFGL-NGS-52696	1	2	DOM	3/22	65/206	0.2189		1	ARS-BFGL-NGS-52696	1	2	REC	1/24	5/266	0.4139
1	Hapmap39218-BTA-25795	56722807	1	0.36	0.3708	2	1	0.9543		1	Hapmap39218-BTA-25795	1	2	DOM	16/9	162/109	0.8316		1	Hapmap39218-BTA-25795	1	2	REC	2/23	39/232	0.5489
1	ARS-BFGL-NGS-89	56752229	1	0.12	0.1981	2	0.2579	0.5518		1	ARS-BFGL-NGS-89	1	2	DOM	5/20	100/170	0.1251		1	ARS-BFGL-NGS-89	1	2	REC	1/24	7/263	0.512
1	UA-IFASA-5597	56790295	1	0.34	0.4446	2	0.1803	0.6434		1	UA-IFASA-5597	1	2	DOM	15/10	192/79	0.2616		1	UA-IFASA-5597	1	2	REC	2/23	49/222	0.2734
1	ARS-BFGL-NGS-18996	56841984	1	0.52	0.4004	2	0.1322	1.623		1	ARS-BFGL-NGS-18996	1	2	DOM	21/4	173/98	0.04808		1	ARS-BFGL-NGS-18996	1	2	REC	5/20	44/227	0.5804
1	BovineHD0100016232	56873807	1	0.46	0.4611	2	1	0.9955		1	BovineHD0100016232	1	2	DOM	18/7	189/81	1		1	BovineHD0100016232	1	2	REC	5/20	60/210	1
1	BovineHD0100016238	56903414	1	0.38	0.4315	2	0.5511	0.8076		1	BovineHD0100016238	1	2	DOM	14/11	184/86	0.2657		1	BovineHD0100016238	1	2	REC	5/20	49/221	0.7892
1	Hapmap59481-rs29019616	56944392	2	0.12	0.1255	1	1	0.9505		1	Hapmap59481-rs29019616	2	1	DOM	6/19	63/208	1		1	Hapmap59481-rs29019616	2	1	REC	0/25	5/266	1
1	BovineHD0100016281	56978092	1	0.52	0.4815	2	0.6584	1.167		1	BovineHD0100016281	1	2	DOM	21/4	207/63	0.6173		1	BovineHD0100016281	1	2	REC	5/20	53/217	1
1	BovineHD0100016287	56995206	2	0.26	0.2667	1	1	0.9662		1	BovineHD0100016287	2	1	DOM	12/13	124/146	0.8377		1	BovineHD0100016287	2	1	REC	1/24	20/250	1
1	BovineHD0100016294	57006702	1	0.3	0.4022	2	0.1752	0.637		1	BovineHD0100016294	1	2	DOM	12/13	183/88	0.07546		1	BovineHD0100016294	1	2	REC	3/22	35/236	1
1	Hapmap44594-BTA-25389	57029947	2	0.16	0.2786	1	0.09398	0.4932		1	Hapmap44594-BTA-25389	2	1	DOM	7/18	136/135	0.03758		1	Hapmap44594-BTA-25389	2	1	REC	1/24	15/256	1
1	BTA-25403-no-rs	57147119	2	0.18	0.1347	1	0.3911	1.41		1	BTA-25403-no-rs	2	1	DOM	9/16	67/204	0.2343		1	BTA-25403-no-rs	2	1	REC	0/25	6/265	1
1	ARS-BFGL-NGS-34519	57180246	1	0.04	0.03321	2	0.6824	1.213		1	ARS-BFGL-NGS-34519	1	2	DOM	2/23	18/253	0.6807		1	ARS-BFGL-NGS-34519	1	2	REC	0/25	0/271	1
1	Hapmap38147-BTA-25404	57217658	2	0.4	0.3173	1	0.269	1.434		1	Hapmap38147-BTA-25404	2	1	DOM	18/7	148/123	0.1391		1	Hapmap38147-BTA-25404	2	1	REC	2/23	24/247	1
1	ARS-BFGL-NGS-102073	57249444	1	0.04	0.0738	2	0.5652	0.5229		1	ARS-BFGL-NGS-102073	1	2	DOM	2/23	39/232	0.5489		1	ARS-BFGL-NGS-102073	1	2	REC	0/25	1/270	1
1	BovineHD0100016358	57269695	2	0.28	0.2204	1	0.3758	1.376		1	BovineHD0100016358	2	1	DOM	14/11	101/169	0.08615		1	BovineHD0100016358	2	1	REC	0/25	18/252	0.3804
1	Hapmap55498-ss46527080	57309255	1	0.38	0.3542	2	0.7583	1.117		1	Hapmap55498-ss46527080	1	2	DOM	17/8	158/113	0.4003		1	Hapmap55498-ss46527080	1	2	REC	2/23	34/237	0.7508
1	BovineHD0100016374	57354786	2	0.28	0.2362	1	0.4907	1.258		1	BovineHD0100016374	2	1	DOM	14/11	107/164	0.1366		1	BovineHD0100016374	2	1	REC	0/25	21/250	0.2346
1	ARS-BFGL-NGS-94399	57399338	2	0.04	0.1181	1	0.1033	0.3112		1	ARS-BFGL-NGS-94399	2	1	DOM	2/23	61/210	0.1239		1	ARS-BFGL-NGS-94399	2	1	REC	0/25	3/268	1
1	ARS-BFGL-NGS-109258	57447817	1	0.04	0.0738	2	0.5652	0.5229		1	ARS-BFGL-NGS-109258	1	2	DOM	2/23	39/232	0.5489		1	ARS-BFGL-NGS-109258	1	2	REC	0/25	1/270	1
1	ARS-BFGL-NGS-112451	57469104	1	0.52	0.4483	2	0.3741	1.333		1	ARS-BFGL-NGS-112451	1	2	DOM	19/6	193/78	0.817		1	ARS-BFGL-NGS-112451	1	2	REC	7/18	50/221	0.2868
1	ARS-BFGL-NGS-87988	57496780	2	0.04	0.07407	1	0.5653	0.5208		1	ARS-BFGL-NGS-87988	2	1	DOM	2/23	39/231	0.5489		1	ARS-BFGL-NGS-87988	2	1	REC	0/25	1/269	1
1	BovineHD0100016445	57668777	2	0.46	0.4007	1	0.4527	1.274		1	BovineHD0100016445	2	1	DOM	19/6	177/90	0.38		1	BovineHD0100016445	2	1	REC	4/21	37/230	0.7637
1	BovineHD0100016455	57703184	2	0.52	0.3579	1	0.03142	1.943		1	BovineHD0100016455	2	1	DOM	21/4	161/110	0.01734		1	BovineHD0100016455	2	1	REC	5/20	33/238	0.3421
1	BovineHD0100016466	57757427	2	0.3	0.2659	1	0.6181	1.183		1	BovineHD0100016466	2	1	DOM	15/10	125/142	0.2175		1	BovineHD0100016466	2	1	REC	0/25	17/250	0.3775
1	BovineHD0100016479	57824017	1	0.4	0.3948	2	1	1.022		1	BovineHD0100016479	1	2	DOM	15/10	169/102	0.8317		1	BovineHD0100016479	1	2	REC	5/20	45/226	0.5877
1	BovineHD0100016540	57991815	2	0.28	0.4157	1	0.07063	0.5465		1	BovineHD0100016540	2	1	DOM	14/11	179/88	0.2757		1	BovineHD0100016540	2	1	REC	0/25	43/224	0.03335
1	ARS-BFGL-NGS-40337	58000696	1	0.42	0.4336	2	0.8825	0.946		1	ARS-BFGL-NGS-40337	1	2	DOM	17/8	183/88	1		1	ARS-BFGL-NGS-40337	1	2	REC	4/21	52/219	1
1	BovineHD0100016543	58010555	2	0.38	0.264	1	0.09637	1.708		1	BovineHD0100016543	2	1	DOM	15/10	122/145	0.2098		1	BovineHD0100016543	2	1	REC	4/21	19/248	0.1206
1	BovineHD0100016547	58022228	1	0.6	0.4682	2	0.07771	1.704		1	BovineHD0100016547	1	2	DOM	22/3	193/74	0.1004		1	BovineHD0100016547	1	2	REC	8/17	57/210	0.2171
1	BovineHD0100016552	58037238	1	0.4	0.4111	2	1	0.955		1	BovineHD0100016552	1	2	DOM	17/8	174/96	0.8287		1	BovineHD0100016552	1	2	REC	3/22	48/222	0.589
1	BovineHD0100016570	58101934	1	0.26	0.2177	2	0.4795	1.262		1	BovineHD0100016570	1	2	DOM	10/15	103/168	0.8331		1	BovineHD0100016570	1	2	REC	3/22	15/256	0.1859
1	BovineHD0100016583	58142540	2	0.16	0.1273	1	0.5098	1.306		1	BovineHD0100016583	2	1	DOM	7/18	67/204	0.8093		1	BovineHD0100016583	2	1	REC	1/24	2/269	0.2333
1	Hapmap36459-SCAFFOLD9563_462	58250592	1	0.16	0.2214	2	0.3724	0.6698		1	Hapmap36459-SCAFFOLD9563_462	1	2	DOM	7/18	108/163	0.2885		1	Hapmap36459-SCAFFOLD9563_462	1	2	REC	1/24	12/259	1
1	Hapmap23307-BTA-124083	58277309	2	0.02	0.0369	1	1	0.5327		1	Hapmap23307-BTA-124083	2	1	DOM	1/24	20/251	1		1	Hapmap23307-BTA-124083	2	1	REC	0/25	0/271	1
1	ARS-BFGL-NGS-103637	58315322	2	0.18	0.1389	1	0.4013	1.361		1	ARS-BFGL-NGS-103637	2	1	DOM	7/18	71/199	0.8162		1	ARS-BFGL-NGS-103637	2	1	REC	2/23	4/266	0.08382
1	BovineHD0100016660	58350244	1	0.46	0.4188	2	0.6539	1.182		1	BovineHD0100016660	1	2	DOM	18/7	183/88	0.8234		1	BovineHD0100016660	1	2	REC	5/20	44/227	0.5804
1	BovineHD0100016692	58509867	1	0.08	0.09888	2	0.8069	0.7925		1	BovineHD0100016692	1	2	DOM	4/21	52/216	0.7961		1	BovineHD0100016692	1	2	REC	0/25	1/267	1
1	BovineHD0100016696	58530676	1	0.52	0.4663	2	0.5538	1.24		1	BovineHD0100016696	1	2	DOM	20/5	192/75	0.486		1	BovineHD0100016696	1	2	REC	6/19	57/210	0.7997
1	BovineHD0100016697	58535639	1	0.52	0.4663	2	0.5538	1.24		1	BovineHD0100016697	1	2	DOM	20/5	192/75	0.486		1	BovineHD0100016697	1	2	REC	6/19	57/210	0.7997
1	Hapmap44172-BTA-96950	58540410	1	0.52	0.4649	2	0.4635	1.247		1	Hapmap44172-BTA-96950	1	2	DOM	20/5	195/76	0.4864		1	Hapmap44172-BTA-96950	1	2	REC	6/19	57/214	0.7983
1	BovineHD0100046466	58586597	2	0.26	0.1315	1	0.01909	2.321		1	BovineHD0100046466	2	1	DOM	11/14	65/205	0.05241		1	BovineHD0100046466	2	1	REC	2/23	6/264	0.1408
1	Hapmap47450-BTA-96948	58626471	1	0.42	0.3506	2	0.3557	1.342		1	Hapmap47450-BTA-96948	1	2	DOM	18/7	157/114	0.2053		1	Hapmap47450-BTA-96948	1	2	REC	3/22	33/238	1
1	BovineHD0100016719	58630970	2	0.1	0.1033	1	1	0.9643		1	BovineHD0100016719	2	1	DOM	5/20	54/217	1		1	BovineHD0100016719	2	1	REC	0/25	2/269	1
1	BovineHD0100016728	58675214	2	0.125	0.2305	1	0.1039	0.477		1	BovineHD0100016728	2	1	DOM	5/19	117/152	0.03226		1	BovineHD0100016728	2	1	REC	1/23	7/262	0.4996
1	BTA-96949-no-rs	58773333	1	0.4	0.3616	2	0.6457	1.177		1	BTA-96949-no-rs	1	2	DOM	17/8	163/108	0.5243		1	BTA-96949-no-rs	1	2	REC	3/22	33/238	1
1	BovineHD0100016781	58803748	2	0.1875	0.2556	1	0.3845	0.6722		1	BovineHD0100016781	2	1	DOM	8/16	119/151	0.3915		1	BovineHD0100016781	2	1	REC	1/23	19/251	1
1	BTA-31615-no-rs	58830804	1	0.22	0.3192	2	0.2006	0.6016		1	BTA-31615-no-rs	1	2	DOM	9/16	149/122	0.09274		1	BTA-31615-no-rs	1	2	REC	2/23	24/247	1
1	BovineHD0100016763	58880630	2	0.2174	0.3545	1	0.07443	0.5058		1	BovineHD0100016763	2	1	DOM	8/15	161/107	0.02621		1	BovineHD0100016763	2	1	REC	2/21	29/239	1
1	Hapmap44328-BTA-97952	58885004	1	0.06	0.1439	2	0.1302	0.3797		1	Hapmap44328-BTA-97952	1	2	DOM	3/22	74/197	0.1501		1	Hapmap44328-BTA-97952	1	2	REC	0/25	4/267	1
1	BovineHD0100016802	58914092	2	0.1667	0.2082	1	0.579	0.7607		1	BovineHD0100016802	2	1	DOM	7/17	103/166	0.5101		1	BovineHD0100016802	2	1	REC	1/23	9/260	0.5805
1	ARS-USMARC-Parent-DQ404150-rs29012530	58965351	1	0.2	0.2435	2	0.6043	0.7765		1	ARS-USMARC-Parent-DQ404150-rs29012530	1	2	DOM	9/16	117/154	0.5328		1	ARS-USMARC-Parent-DQ404150-rs29012530	1	2	REC	1/24	15/256	1
1	UA-IFASA-2169	58991146	1	0.32	0.2583	2	0.4011	1.351		1	UA-IFASA-2169	1	2	DOM	14/11	125/146	0.4047		1	UA-IFASA-2169	1	2	REC	2/23	15/256	0.6442
1	BovineHD0100016837	58999514	1	0.4783	0.4739	2	1	1.018		1	BovineHD0100016837	1	2	DOM	17/6	203/65	0.804		1	BovineHD0100016837	1	2	REC	5/18	51/217	0.7831
1	BovineHD0100016850	59041533	1	0.28	0.437	2	0.036	0.5009		1	BovineHD0100016850	1	2	DOM	12/13	192/78	0.02294		1	BovineHD0100016850	1	2	REC	2/23	44/226	0.3917
1	BTB-00028136	59116837	1	0.28	0.2196	2	0.3751	1.382		1	BTB-00028136	1	2	DOM	12/13	108/163	0.5239		1	BTB-00028136	1	2	REC	2/23	11/260	0.3017
1	BTB-01868157	59146697	1	0.08	0.1033	2	0.807	0.7547		1	BTB-01868157	1	2	DOM	4/21	53/218	0.7959		1	BTB-01868157	1	2	REC	0/25	3/268	1
1	BovineHD0100016878	59159905	1	0.44	0.4167	2	0.7661	1.1		1	BovineHD0100016878	1	2	DOM	19/6	177/93	0.3778		1	BovineHD0100016878	1	2	REC	3/22	48/222	0.589
1	BTB-00028238	59203569	1	0.3	0.3376	2	0.6413	0.8407		1	BTB-00028238	1	2	DOM	14/11	151/120	1		1	BTB-00028238	1	2	REC	1/24	32/239	0.3321
1	Hapmap48289-BTA-31617	59240053	2	0.1	0.1347	1	0.662	0.7139		1	Hapmap48289-BTA-31617	2	1	DOM	4/21	68/203	0.4645		1	Hapmap48289-BTA-31617	2	1	REC	1/24	5/266	0.4139
1	ARS-BFGL-NGS-94997	59266659	1	0.16	0.2362	2	0.2913	0.6161		1	ARS-BFGL-NGS-94997	1	2	DOM	8/17	114/157	0.3987		1	ARS-BFGL-NGS-94997	1	2	REC	0/25	14/257	0.617
1	BovineHD0100016948	59444156	2	0.46	0.3506	1	0.1265	1.578		1	BovineHD0100016948	2	1	DOM	19/6	160/111	0.1337		1	BovineHD0100016948	2	1	REC	4/21	30/241	0.5074
1	BovineHD0100016955	59474636	2	0.34	0.393	1	0.5449	0.7957		1	BovineHD0100016955	2	1	DOM	17/8	172/99	0.8283		1	BovineHD0100016955	2	1	REC	0/25	41/230	0.03247
1	BovineHD0100016959	59498681	1	0.2	0.1882	2	0.8506	1.078		1	BovineHD0100016959	1	2	DOM	8/17	92/179	1		1	BovineHD0100016959	1	2	REC	2/23	10/261	0.2686
1	Hapmap48717-BTA-31633	59520349	1	0.32	0.3653	2	0.6447	0.8176		1	Hapmap48717-BTA-31633	1	2	DOM	13/12	166/105	0.3969		1	Hapmap48717-BTA-31633	1	2	REC	3/22	32/239	1
1	BTB-00028647	59555496	1	0.46	0.3303	2	0.08531	1.727		1	BTB-00028647	1	2	DOM	19/6	149/122	0.05639		1	BTB-00028647	1	2	REC	4/21	30/241	0.5074
1	BovineHD0100016992	59659477	2	0.18	0.2444	1	0.3867	0.6785		1	BovineHD0100016992	2	1	DOM	8/17	117/153	0.2986		1	BovineHD0100016992	2	1	REC	1/24	15/255	1
1	Hapmap31065-BTA-123406	59686995	2	0.2	0.2768	1	0.3177	0.6533		1	Hapmap31065-BTA-123406	2	1	DOM	9/16	132/139	0.2958		1	Hapmap31065-BTA-123406	2	1	REC	1/24	18/253	1
1	BovineHD0100017003	59704724	1	0.3	0.4222	2	0.1003	0.5865		1	BovineHD0100017003	1	2	DOM	13/12	190/80	0.07115		1	BovineHD0100017003	1	2	REC	2/23	38/232	0.549
1	BTA-31638-no-rs	59733534	2	0.02	0.02952	1	1	0.6709		1	BTA-31638-no-rs	2	1	DOM	1/24	16/255	1		1	BTA-31638-no-rs	2	1	REC	0/25	0/271	1
1	ARS-BFGL-NGS-110620	59777594	1	0.1	0.1771	2	0.2365	0.5162		1	ARS-BFGL-NGS-110620	1	2	DOM	5/20	88/183	0.2618		1	ARS-BFGL-NGS-110620	1	2	REC	0/25	8/263	1
1	BovineHD0100017026	59780658	1	0.46	0.4207	2	0.6543	1.173		1	BovineHD0100017026	1	2	DOM	19/6	179/92	0.3791		1	BovineHD0100017026	1	2	REC	4/21	49/222	1
1	BovineHD0100017032	59814364	1	0.36	0.2389	2	0.06209	1.792		1	BovineHD0100017032	1	2	DOM	16/9	111/159	0.03429		1	BovineHD0100017032	1	2	REC	2/23	18/252	0.6816
1	BovineHD0100017052	59896010	1	0.1458	0.1654	2	0.8406	0.8613		1	BovineHD0100017052	1	2	DOM	6/18	81/188	0.8159		1	BovineHD0100017052	1	2	REC	1/23	8/261	0.5417
1	Hapmap47563-BTA-31648	59924376	2	0.22	0.3044	1	0.2583	0.6444		1	Hapmap47563-BTA-31648	2	1	DOM	9/16	145/126	0.09962		1	Hapmap47563-BTA-31648	2	1	REC	2/23	20/251	1
1	BovineHD0100017076	59960792	1	0.22	0.3148	2	0.2001	0.6139		1	BovineHD0100017076	1	2	DOM	9/16	148/122	0.09316		1	BovineHD0100017076	1	2	REC	2/23	22/248	1
1	ARS-BFGL-NGS-36297	59980590	1	0.26	0.3745	2	0.1252	0.5867		1	ARS-BFGL-NGS-36297	1	2	DOM	12/13	170/101	0.1967		1	ARS-BFGL-NGS-36297	1	2	REC	1/24	33/238	0.3312
1	BovineHD0100017085	59982960	2	0.44	0.5	1	0.4613	0.7857		1	BovineHD0100017085	2	1	DOM	19/6	200/68	1		1	BovineHD0100017085	2	1	REC	3/22	68/200	0.2198
1	BovineHD4100000339	60006646	2	0.38	0.1914	1	0.003155	2.588		1	BovineHD4100000339	2	1	DOM	16/9	96/173	0.008613		1	BovineHD4100000339	2	1	REC	3/22	7/262	0.04383
1	ARS-BFGL-NGS-115239	60022954	2	0.16	0.2749	1	0.09369	0.5024		1	ARS-BFGL-NGS-115239	2	1	DOM	7/18	132/139	0.0591		1	ARS-BFGL-NGS-115239	2	1	REC	1/24	17/254	1
1	BovineHD0100017119	60087869	2	0.36	0.417	1	0.4572	0.7865		1	BovineHD0100017119	2	1	DOM	17/8	183/88	1		1	BovineHD0100017119	2	1	REC	1/24	43/228	0.1446
1	BovineHD0100017124	60123244	2	0.58	0.4389	1	0.07378	1.766		1	BovineHD0100017124	2	1	DOM	22/3	190/80	0.06559		1	BovineHD0100017124	2	1	REC	7/18	47/223	0.1853
1	BTB-02009342	60212971	2	0.46	0.3192	1	0.05835	1.817		1	BTB-02009342	2	1	DOM	20/5	150/121	0.01948		1	BTB-02009342	2	1	REC	3/22	23/248	0.4703
1	BTA-23353-no-rs	60247154	2	0.56	0.4114	1	0.05141	1.821		1	BTA-23353-no-rs	2	1	DOM	22/3	181/90	0.0403		1	BTA-23353-no-rs	2	1	REC	6/19	42/229	0.2627
1	ARS-BFGL-NGS-117152	60275851	1	0.34	0.2583	2	0.2408	1.479		1	ARS-BFGL-NGS-117152	1	2	DOM	15/10	122/149	0.2079		1	ARS-BFGL-NGS-117152	1	2	REC	2/23	18/253	0.6807
1	UA-IFASA-7336	60313183	1	0.08	0.1642	2	0.1538	0.4426		1	UA-IFASA-7336	1	2	DOM	4/21	83/188	0.1686		1	UA-IFASA-7336	1	2	REC	0/25	6/265	1
1	BovineHD0100017217	60339396	1	0.32	0.3852	2	0.4467	0.7511		1	BovineHD0100017217	1	2	DOM	14/11	169/101	0.5249		1	BovineHD0100017217	1	2	REC	2/23	39/231	0.5489
1	Hapmap57078-ss46526391	60407283	2	0.14	0.2509	1	0.08579	0.486		1	Hapmap57078-ss46526391	2	1	DOM	7/18	122/149	0.1393		1	Hapmap57078-ss46526391	2	1	REC	0/25	14/257	0.617
1	ARS-BFGL-NGS-30543	60434371	1	0.36	0.4428	2	0.298	0.7078		1	ARS-BFGL-NGS-30543	1	2	DOM	14/11	194/77	0.1129		1	ARS-BFGL-NGS-30543	1	2	REC	4/21	46/225	1
1	BTB-00029666	60476588	2	0.42	0.428	1	1	0.9676		1	BTB-00029666	2	1	DOM	17/8	180/91	1		1	BTB-00029666	2	1	REC	4/21	52/219	1
1	BovineHD0100017270	60497520	1	0	0.02037	2	0.6116	0		1	BovineHD0100017270	1	2	DOM	0/25	11/259	0.6077		1	BovineHD0100017270	1	2	REC	0/25	0/270	1
1	Hapmap48290-BTA-31675	60519622	2	0.52	0.4336	1	0.2974	1.415		1	Hapmap48290-BTA-31675	2	1	DOM	19/6	191/80	0.6509		1	Hapmap48290-BTA-31675	2	1	REC	7/18	44/227	0.1632
1	Hapmap42177-BTA-31679	60575311	1	0.22	0.2934	2	0.3283	0.6794		1	Hapmap42177-BTA-31679	1	2	DOM	11/14	138/133	0.5374		1	Hapmap42177-BTA-31679	1	2	REC	0/25	21/250	0.2346
1	Hapmap35167-VSWCP1D5775A_scf01	60638907	2	0.28	0.3413	1	0.4361	0.7505		1	Hapmap35167-VSWCP1D5775A_scf01	2	1	DOM	13/12	155/116	0.6756		1	Hapmap35167-VSWCP1D5775A_scf01	2	1	REC	1/24	30/241	0.4918
1	BovineHD0100017342	60645127	2	0.14	0.2045	1	0.3549	0.6334		1	BovineHD0100017342	2	1	DOM	7/18	99/170	0.5144		1	BovineHD0100017342	2	1	REC	0/25	11/258	0.6076
1	ARS-BFGL-NGS-107624	60678008	2	0.18	0.2232	1	0.5931	0.7638		1	ARS-BFGL-NGS-107624	2	1	DOM	9/16	110/161	0.8316		1	ARS-BFGL-NGS-107624	2	1	REC	0/25	11/260	0.6078
1	BTB-00030270	60709251	2	0.06	0.04797	1	0.7276	1.267		1	BTB-00030270	2	1	DOM	2/23	25/246	1		1	BTB-00030270	2	1	REC	1/24	1/270	0.162
1	ARS-BFGL-NGS-3821	60736616	1	0.42	0.3708	2	0.5422	1.229		1	ARS-BFGL-NGS-3821	1	2	DOM	18/7	161/110	0.2861		1	ARS-BFGL-NGS-3821	1	2	REC	3/22	40/231	1
1	Hapmap41191-BTA-16674	60779046	2	0.28	0.2915	1	1	0.9451		1	Hapmap41191-BTA-16674	2	1	DOM	11/14	135/136	0.6774		1	Hapmap41191-BTA-16674	2	1	REC	3/22	23/248	0.4703
1	BTB-02006134	60806613	2	0.64	0.4834	1	0.03857	1.9		1	BTB-02006134	2	1	DOM	23/2	198/73	0.05144		1	BTB-02006134	2	1	REC	9/16	64/207	0.2229
1	Hapmap59735-rs29016420	60831272	2	0.52	0.3321	1	0.01226	2.179		1	Hapmap59735-rs29016420	2	1	DOM	21/4	155/116	0.009809		1	Hapmap59735-rs29016420	2	1	REC	5/20	25/246	0.1544
1	BovineHD0100017398	60831984	1	0.38	0.1956	2	0.00569	2.521		1	BovineHD0100017398	1	2	DOM	16/9	98/173	0.009065		1	BovineHD0100017398	1	2	REC	3/22	8/263	0.05592
1	ARS-BFGL-BAC-20015	60899823	1	0.5	0.4317	2	0.3739	1.316		1	ARS-BFGL-BAC-20015	1	2	DOM	19/6	185/86	0.5039		1	ARS-BFGL-BAC-20015	1	2	REC	6/19	49/222	0.43
1	BovineHD0100017425	60943734	1	0.4	0.237	2	0.01613	2.146		1	BovineHD0100017425	1	2	DOM	17/8	116/154	0.02028		1	BovineHD0100017425	1	2	REC	3/22	12/258	0.1237
1	BTB-00031129	60979138	1	0.08	0.03875	2	0.1517	2.157		1	BTB-00031129	1	2	DOM	4/21	21/250	0.2471		1	BTB-00031129	1	2	REC	0/25	0/271	1
1	BovineHD0100017450	61036146	2	0.28	0.3727	1	0.221	0.6546		1	BovineHD0100017450	2	1	DOM	12/13	169/102	0.1984		1	BovineHD0100017450	2	1	REC	2/23	33/238	0.7505
1	BovineHD0100017461	61075432	2	0.26	0.2574	1	1	1.014		1	BovineHD0100017461	2	1	DOM	11/14	122/148	1		1	BovineHD0100017461	2	1	REC	2/23	17/253	0.6687
1	BTB-00030962	61100002	2	0.16	0.1937	1	0.7072	0.7927		1	BTB-00030962	2	1	DOM	7/18	92/179	0.6604		1	BTB-00030962	2	1	REC	1/24	13/258	1
1	Hapmap38402-BTA-32592	61128757	1	0.52	0.428	2	0.2343	1.448		1	Hapmap38402-BTA-32592	1	2	DOM	19/6	183/88	0.5023		1	Hapmap38402-BTA-32592	1	2	REC	7/18	49/222	0.2822
1	BTB-00030894	61160105	2	0.16	0.2565	1	0.1703	0.5522		1	BTB-00030894	2	1	DOM	8/17	126/145	0.2086		1	BTB-00030894	2	1	REC	0/25	13/258	0.6114
1	BTA-31690-no-rs	61189193	2	0	0.01292	1	1	0		1	BTA-31690-no-rs	2	1	DOM	0/25	7/264	1		1	BTA-31690-no-rs	2	1	REC	0/25	0/271	1
1	BTB-00030699	61219155	2	0.08	0.1181	1	0.6413	0.6495		1	BTB-00030699	2	1	DOM	4/21	60/211	0.6154		1	BTB-00030699	2	1	REC	0/25	4/267	1
1	ARS-BFGL-NGS-27164	61244179	2	0.02	0.05166	1	0.4996	0.3746		1	ARS-BFGL-NGS-27164	2	1	DOM	1/24	26/245	0.713		1	ARS-BFGL-NGS-27164	2	1	REC	0/25	2/269	1
1	BovineHD0100017541	61290448	2	0.5	0.3561	1	0.04738	1.808		1	BovineHD0100017541	2	1	DOM	20/5	159/112	0.0525		1	BovineHD0100017541	2	1	REC	5/20	34/237	0.348
1	BTB-00030560	61312093	1	0	0.04428	2	0.2507	0		1	BTB-00030560	1	2	DOM	0/25	23/248	0.2369		1	BTB-00030560	1	2	REC	0/25	1/270	1
1	Hapmap53538-rs29018897	61346083	2	0.16	0.2768	1	0.0937	0.4978		1	Hapmap53538-rs29018897	2	1	DOM	8/17	133/138	0.1421		1	Hapmap53538-rs29018897	2	1	REC	0/25	17/254	0.3773
1	ARS-BFGL-NGS-2189	61409890	1	0.32	0.4244	2	0.1778	0.6384		1	ARS-BFGL-NGS-2189	1	2	DOM	15/10	185/86	0.3831		1	ARS-BFGL-NGS-2189	1	2	REC	1/24	45/226	0.1454
1	BovineHD0100017600	61470011	2	0.32	0.4926	1	0.02568	0.4847		1	BovineHD0100017600	2	1	DOM	15/10	203/68	0.1517		1	BovineHD0100017600	2	1	REC	1/24	64/207	0.02172
1	Hapmap51585-BTA-32601	61517865	1	0.16	0.2546	2	0.1702	0.5576		1	Hapmap51585-BTA-32601	1	2	DOM	8/17	125/146	0.21		1	Hapmap51585-BTA-32601	1	2	REC	0/25	13/258	0.6114
1	BTA-103663-no-rs	61538142	2	0.04	0.07565	1	0.5669	0.5091		1	BTA-103663-no-rs	2	1	DOM	2/23	39/232	0.5489		1	BTA-103663-no-rs	2	1	REC	0/25	2/269	1
1	BovineHD0100017627	61555038	2	0.28	0.4296	1	0.05053	0.5163		1	BovineHD0100017627	2	1	DOM	12/13	182/88	0.07575		1	BovineHD0100017627	2	1	REC	2/23	50/220	0.2732
1	ARS-BFGL-NGS-40229	61583136	1	0.26	0.3118	2	0.5233	0.7755		1	ARS-BFGL-NGS-40229	1	2	DOM	12/13	139/132	0.8357		1	ARS-BFGL-NGS-40229	1	2	REC	1/24	30/241	0.4918
1	BovineHD0100017646	61605906	1	0.24	0.2804	2	0.6222	0.8102		1	BovineHD0100017646	1	2	DOM	11/14	128/143	0.8357		1	BovineHD0100017646	1	2	REC	1/24	24/247	0.7069
1	BovineHD0100017648	61618060	2	0.26	0.3074	1	0.5249	0.7916		1	BovineHD0100017648	2	1	DOM	12/13	138/132	0.8359		1	BovineHD0100017648	2	1	REC	1/24	28/242	0.4879
1	ARS-BFGL-NGS-101934	61629350	2	0.32	0.1199	1	0.0003795	3.453		1	ARS-BFGL-NGS-101934	2	1	DOM	15/10	62/209	0.000177		1	ARS-BFGL-NGS-101934	2	1	REC	1/24	3/268	0.2987
1	BovineHD0100017650	61638069	2	0.26	0.4	1	0.06781	0.527		1	BovineHD0100017650	2	1	DOM	12/13	182/88	0.07575		1	BovineHD0100017650	2	1	REC	1/24	34/236	0.332
1	BovineHD0100017660	61697968	2	0.4	0.4649	1	0.4588	0.7672		1	BovineHD0100017660	2	1	DOM	18/7	204/67	0.8093		1	BovineHD0100017660	2	1	REC	2/23	48/223	0.2747
1	Hapmap42400-BTA-102731	61741423	2	0.52	0.4668	1	0.5541	1.237		1	Hapmap42400-BTA-102731	2	1	DOM	22/3	201/70	0.1502		1	Hapmap42400-BTA-102731	2	1	REC	4/21	52/219	1
1	BovineHD0100017684	61774550	1	0.36	0.1494	2	0.0005072	3.201		1	BovineHD0100017684	1	2	DOM	17/8	76/195	0.0001423		1	BovineHD0100017684	1	2	REC	1/24	5/266	0.4139
1	ARS-BFGL-NGS-91410	61817159	2	0.36	0.1439	1	0.0003809	3.346		1	ARS-BFGL-NGS-91410	2	1	DOM	17/8	73/198	5.648e-05		1	ARS-BFGL-NGS-91410	2	1	REC	1/24	5/266	0.4139
1	BovineHD0100017707	61897376	2	0.24	0.2712	1	0.7397	0.8485		1	BovineHD0100017707	2	1	DOM	12/13	128/143	1		1	BovineHD0100017707	2	1	REC	0/25	19/252	0.3855
1	BTB-01806856	62003821	1	0.16	0.2675	2	0.1274	0.5215		1	BTB-01806856	1	2	DOM	8/17	127/144	0.2078		1	BTB-01806856	1	2	REC	0/25	18/253	0.3802
1	BovineHD0100017729	62009095	2	0.32	0.413	1	0.2298	0.669		1	BovineHD0100017729	2	1	DOM	14/11	179/91	0.3793		1	BovineHD0100017729	2	1	REC	2/23	44/226	0.3917
1	BovineHD0100017746	62066946	1	0.14	0.1661	2	0.8415	0.8176		1	BovineHD0100017746	1	2	DOM	6/19	84/187	0.6499		1	BovineHD0100017746	1	2	REC	1/24	6/265	0.4644
1	Hapmap39200-BTA-32607	62092465	1	0.62	0.4631	2	0.03831	1.892		1	Hapmap39200-BTA-32607	1	2	DOM	21/4	195/76	0.2437		1	Hapmap39200-BTA-32607	1	2	REC	10/15	56/215	0.04126
1	Hapmap38640-BTA-92406	62137916	2	0.56	0.4539	1	0.1821	1.531		1	Hapmap38640-BTA-92406	2	1	DOM	21/4	193/78	0.2427		1	Hapmap38640-BTA-92406	2	1	REC	7/18	53/218	0.3058
1	BovineHD0100017773	62178500	1	0.36	0.4463	2	0.2972	0.6979		1	BovineHD0100017773	1	2	DOM	17/8	192/78	0.8185		1	BovineHD0100017773	1	2	REC	1/24	49/221	0.09268
1	BovineHD0100017775	62188650	1	0.4792	0.3614	2	0.1194	1.625		1	BovineHD0100017775	1	2	DOM	20/4	160/107	0.02746		1	BovineHD0100017775	1	2	REC	3/21	33/234	1
1	BTB-00031464	62207514	1	0.26	0.3063	2	0.6294	0.7958		1	BTB-00031464	1	2	DOM	12/13	147/124	0.6759		1	BTB-00031464	1	2	REC	1/24	19/252	1
1	BovineHD0100017788	62228314	2	0.26	0.2546	1	1	1.029		1	BovineHD0100017788	2	1	DOM	11/14	125/146	1		1	BovineHD0100017788	2	1	REC	2/23	13/258	0.3673
1	BTB-00031535	62238398	2	0.2	0.2085	1	1	0.9491		1	BTB-00031535	2	1	DOM	9/16	100/171	1		1	BTB-00031535	2	1	REC	1/24	13/258	1
1	BovineHD0100017797	62247467	2	0.3913	0.4093	1	0.8766	0.9279		1	BovineHD0100017797	2	1	DOM	14/9	178/92	0.6512		1	BovineHD0100017797	2	1	REC	4/19	43/227	0.7723
1	ARS-BFGL-NGS-42248	62269764	2	0.24	0.3192	1	0.2691	0.6736		1	ARS-BFGL-NGS-42248	2	1	DOM	11/14	149/122	0.3034		1	ARS-BFGL-NGS-42248	2	1	REC	1/24	24/247	0.7069
1	BovineHD0100017803	62273759	1	0.3043	0.3704	2	0.4272	0.7438		1	BovineHD0100017803	1	2	DOM	13/10	164/106	0.8247		1	BovineHD0100017803	1	2	REC	1/22	36/234	0.3301
1	ARS-BFGL-NGS-102719	62305513	1	0.3	0.3561	2	0.536	0.775		1	ARS-BFGL-NGS-102719	1	2	DOM	12/13	159/112	0.3977		1	ARS-BFGL-NGS-102719	1	2	REC	3/22	34/237	1
1	BovineHD0100017817	62327960	2	0.54	0.3074	1	0.001399	2.645		1	BovineHD0100017817	2	1	DOM	20/5	139/131	0.006257		1	BovineHD0100017817	2	1	REC	7/18	27/243	0.01512
1	ARS-BFGL-NGS-115080	62364649	2	0.08	0.05904	1	0.5331	1.386		1	ARS-BFGL-NGS-115080	2	1	DOM	4/21	32/239	0.5232		1	ARS-BFGL-NGS-115080	2	1	REC	0/25	0/271	1
1	ARS-BFGL-NGS-114995	62394973	1	0.18	0.2491	2	0.3069	0.6618		1	ARS-BFGL-NGS-114995	1	2	DOM	9/16	124/147	0.4048		1	ARS-BFGL-NGS-114995	1	2	REC	0/25	11/260	0.6078
1	ARS-BFGL-NGS-100977	62421587	2	0.32	0.3432	1	0.8763	0.9007		1	ARS-BFGL-NGS-100977	2	1	DOM	14/11	152/119	1		1	ARS-BFGL-NGS-100977	2	1	REC	2/23	34/237	0.7508
1	BovineHD0100017842	62445177	2	0.14	0.09259	1	0.3122	1.595		1	BovineHD0100017842	2	1	DOM	7/18	49/221	0.283		1	BovineHD0100017842	2	1	REC	0/25	1/269	1
1	BTB-01665387	62457515	1	0.22	0.3653	2	0.04425	0.49		1	BTB-01665387	1	2	DOM	10/15	163/108	0.05799		1	BTB-01665387	1	2	REC	1/24	35/236	0.334
1	BovineHD0100017851	62471598	1	0.3478	0.4481	2	0.2171	0.6567		1	BovineHD0100017851	1	2	DOM	12/11	189/81	0.1001		1	BovineHD0100017851	1	2	REC	4/19	53/217	1
1	BovineHD0100017855	62488432	1	0.1304	0.2045	2	0.3341	0.5836		1	BovineHD0100017855	1	2	DOM	6/17	100/169	0.3689		1	BovineHD0100017855	1	2	REC	0/23	10/259	1
1	BovineHD0100017856	62490666	1	0.1304	0.2045	2	0.3341	0.5836		1	BovineHD0100017856	1	2	DOM	6/17	100/169	0.3689		1	BovineHD0100017856	1	2	REC	0/23	10/259	1
1	ARS-BFGL-NGS-14335	62494500	1	0.14	0.2066	2	0.3557	0.625		1	ARS-BFGL-NGS-14335	1	2	DOM	7/18	101/170	0.3947		1	ARS-BFGL-NGS-14335	1	2	REC	0/25	11/260	0.6078
1	BTB-01506507	62523255	2	0.26	0.3635	1	0.1656	0.6153		1	BTB-01506507	2	1	DOM	12/13	171/100	0.1956		1	BTB-01506507	2	1	REC	1/24	26/245	0.713
1	BovineHD0100017879	62560018	1	0.16	0.1426	2	0.6775	1.145		1	BovineHD0100017879	1	2	DOM	7/18	71/199	0.8162		1	BovineHD0100017879	1	2	REC	1/24	6/264	0.4656
1	BTB-01285049	62594967	2	0.48	0.2878	1	0.006241	2.284		1	BTB-01285049	2	1	DOM	19/6	134/137	0.01203		1	BTB-01285049	2	1	REC	5/20	22/249	0.06318
1	ARS-BFGL-NGS-112682	62631854	2	0.16	0.19	1	0.7073	0.8118		1	ARS-BFGL-NGS-112682	2	1	DOM	7/18	90/181	0.6626		1	ARS-BFGL-NGS-112682	2	1	REC	1/24	13/258	1
1	BTB-01285245	62673903	1	0.56	0.4059	2	0.03697	1.863		1	BTB-01285245	1	2	DOM	23/2	174/97	0.003539		1	BTB-01285245	1	2	REC	5/20	46/225	0.7812
1	Hapmap60296-rs29016002	62715096	1	0.6304	0.4723	2	0.04571	1.906		1	Hapmap60296-rs29016002	1	2	DOM	21/2	192/79	0.04873		1	Hapmap60296-rs29016002	1	2	REC	8/15	64/207	0.3103
1	Hapmap49510-BTA-17452	62768510	1	0.42	0.2546	2	0.01844	2.12		1	Hapmap49510-BTA-17452	1	2	DOM	19/6	126/145	0.005895		1	Hapmap49510-BTA-17452	1	2	REC	2/23	12/259	0.3347
1	ARS-BFGL-NGS-4583	62817866	1	0.4	0.4576	2	0.4613	0.7903		1	ARS-BFGL-NGS-4583	1	2	DOM	16/9	195/76	0.4881		1	ARS-BFGL-NGS-4583	1	2	REC	4/21	53/218	0.7959
1	BTA-32633-no-rs	62841878	1	0.12	0.1347	2	1	0.8761		1	BTA-32633-no-rs	1	2	DOM	6/19	63/208	1		1	BTA-32633-no-rs	1	2	REC	0/25	10/261	1
1	BovineHD0100017984	62855706	2	0.3	0.4333	1	0.07357	0.5604		1	BovineHD0100017984	2	1	DOM	13/12	182/88	0.1273		1	BovineHD0100017984	2	1	REC	2/23	52/218	0.2761
1	BovineHD0100017999	62900770	2	0.38	0.3481	1	0.6453	1.148		1	BovineHD0100017999	2	1	DOM	17/8	164/106	0.5268		1	BovineHD0100017999	2	1	REC	2/23	24/246	1
1	Hapmap24328-BTA-108938	62924157	2	0.3261	0.428	1	0.2138	0.6466		1	Hapmap24328-BTA-108938	2	1	DOM	15/8	189/82	0.6432		1	Hapmap24328-BTA-108938	2	1	REC	0/23	43/228	0.0324
1	BTA-108948-no-rs	62972124	1	0.08	0.06089	2	0.5417	1.341		1	BTA-108948-no-rs	1	2	DOM	4/21	33/238	0.5325		1	BTA-108948-no-rs	1	2	REC	0/25	0/271	1
1	BTA-101821-no-rs	63032317	2	0.14	0.2343	1	0.1576	0.532		1	BTA-101821-no-rs	2	1	DOM	7/18	113/158	0.2072		1	BTA-101821-no-rs	2	1	REC	0/25	14/257	0.617
1	BovineHD0100018022	63041158	2	0.3	0.3796	1	0.2884	0.7003		1	BovineHD0100018022	2	1	DOM	15/10	176/94	0.6633		1	BovineHD0100018022	2	1	REC	0/25	29/241	0.1503
1	ARS-BFGL-NGS-116361	63103154	1	0.14	0.2343	2	0.1576	0.532		1	ARS-BFGL-NGS-116361	1	2	DOM	7/18	113/158	0.2072		1	ARS-BFGL-NGS-116361	1	2	REC	0/25	14/257	0.617
1	Hapmap49061-BTA-122268	63139698	2	0.42	0.5	1	0.3032	0.7241		1	Hapmap49061-BTA-122268	2	1	DOM	20/5	208/63	0.8089		1	Hapmap49061-BTA-122268	2	1	REC	1/24	63/208	0.02202
1	BovineHD0100018044	63162754	2	0.5	0.3611	1	0.07953	1.769		1	BovineHD0100018044	2	1	DOM	19/4	165/105	0.04432		1	BovineHD0100018044	2	1	REC	4/19	30/240	0.3217
1	ARS-BFGL-NGS-44433	63196236	1	0.54	0.4594	2	0.3015	1.381		1	ARS-BFGL-NGS-44433	1	2	DOM	23/2	200/71	0.05108		1	ARS-BFGL-NGS-44433	1	2	REC	4/21	49/222	1
1	Hapmap44333-BTA-104611	63222337	2	0.5	0.3635	1	0.06679	1.751		1	Hapmap44333-BTA-104611	2	1	DOM	21/4	164/107	0.0289		1	Hapmap44333-BTA-104611	2	1	REC	4/21	33/238	0.5325
1	BovineHD0100018062	63256956	1	0.34	0.4446	2	0.1803	0.6434		1	BovineHD0100018062	1	2	DOM	16/9	198/73	0.3535		1	BovineHD0100018062	1	2	REC	1/24	43/228	0.1446
1	ARS-BFGL-NGS-105436	63346740	1	0.26	0.3118	2	0.5233	0.7755		1	ARS-BFGL-NGS-105436	1	2	DOM	11/14	149/122	0.3034		1	ARS-BFGL-NGS-105436	1	2	REC	2/23	20/251	1
1	ARS-BFGL-NGS-3132	63427104	2	0.1	0.1181	1	0.8215	0.8299		1	ARS-BFGL-NGS-3132	2	1	DOM	5/20	63/208	0.8089		1	ARS-BFGL-NGS-3132	2	1	REC	0/25	1/270	1
1	BTB-00640138	63473042	2	0.25	0.3395	1	0.263	0.6486		1	BTB-00640138	2	1	DOM	11/13	156/115	0.2888		1	BTB-00640138	2	1	REC	1/23	28/243	0.4881
1	BTB-00639971	63540783	1	0.1	0.1218	2	0.8211	0.8013		1	BTB-00639971	1	2	DOM	4/21	62/209	0.6158		1	BTB-00639971	1	2	REC	1/24	4/267	0.3588
1	Hapmap31089-BTA-130737	63602126	1	0.1	0.06089	2	0.3577	1.714		1	Hapmap31089-BTA-130737	1	2	DOM	4/21	32/239	0.5232		1	Hapmap31089-BTA-130737	1	2	REC	1/24	1/270	0.162
1	BTB-01687859	63694804	2	0.24	0.3856	1	0.04688	0.5031		1	BTB-01687859	2	1	DOM	10/15	172/99	0.03027		1	BTB-01687859	2	1	REC	2/23	37/234	0.5505
1	BovineHD0100018165	63716985	1	0.4545	0.2007	2	0.0004245	3.318		1	BovineHD0100018165	1	2	DOM	18/4	96/173	3.846e-05		1	BovineHD0100018165	1	2	REC	2/20	12/257	0.2862
1	BovineHD0100018178	63749969	2	0.413	0.2519	1	0.02301	2.09		1	BovineHD0100018178	2	1	DOM	16/7	123/147	0.03054		1	BovineHD0100018178	2	1	REC	3/20	13/257	0.1205
1	ARS-BFGL-NGS-27619	63879508	2	0.4	0.2712	1	0.06956	1.791		1	ARS-BFGL-NGS-27619	2	1	DOM	18/7	130/141	0.03479		1	ARS-BFGL-NGS-27619	2	1	REC	2/23	17/254	0.6679
1	BovineHD0100018250	63914263	2	0.413	0.4796	1	0.443	0.7635		1	BovineHD0100018250	2	1	DOM	14/9	201/69	0.2166		1	BovineHD0100018250	2	1	REC	5/18	58/212	1
1	BovineHD0100018262	63978104	2	0.2609	0.4033	1	0.06043	0.5221		1	BovineHD0100018262	2	1	DOM	11/12	182/87	0.06659		1	BovineHD0100018262	2	1	REC	1/22	35/234	0.3302
1	BovineHD0100018263	63981310	2	0.2609	0.4033	1	0.06043	0.5221		1	BovineHD0100018263	2	1	DOM	11/12	182/87	0.06659		1	BovineHD0100018263	2	1	REC	1/22	35/234	0.3302
1	BTB-00451094	64034192	1	0.26	0.4059	2	0.04913	0.5143		1	BTB-00451094	1	2	DOM	12/13	184/87	0.04956		1	BTB-00451094	1	2	REC	1/24	36/235	0.3374
1	BovineHD0100018286	64041973	1	0.1522	0.2444	2	0.2057	0.5548		1	BovineHD0100018286	1	2	DOM	7/16	118/152	0.2742		1	BovineHD0100018286	1	2	REC	0/23	14/256	0.6119
1	BTB-00033025	64072711	2	0.08	0.1052	1	0.8075	0.7399		1	BTB-00033025	2	1	DOM	4/21	53/218	0.7959		1	BTB-00033025	2	1	REC	0/25	4/267	1
1	ARS-BFGL-NGS-10860	64097352	2	0.2	0.238	1	0.6053	0.8004		1	ARS-BFGL-NGS-10860	2	1	DOM	10/15	119/152	0.8339		1	ARS-BFGL-NGS-10860	2	1	REC	0/25	10/261	1
1	BovineHD0100018302	64119388	1	0.1739	0.2037	2	0.706	0.823		1	BovineHD0100018302	1	2	DOM	7/16	102/168	0.6539		1	BovineHD0100018302	1	2	REC	1/22	8/262	0.5259
1	BovineHD0100018309	64142274	1	0.1364	0.1691	2	0.6782	0.7756		1	BovineHD0100018309	1	2	DOM	5/17	84/185	0.4787		1	BovineHD0100018309	1	2	REC	1/21	7/262	0.4711
1	ARS-BFGL-NGS-71757	64171919	1	0.3	0.3819	2	0.2872	0.6936		1	ARS-BFGL-NGS-71757	1	2	DOM	12/13	167/104	0.2034		1	ARS-BFGL-NGS-71757	1	2	REC	3/22	40/231	1
1	BovineHD0100018320	64178623	1	0.1136	0.1903	2	0.3101	0.5455		1	BovineHD0100018320	1	2	DOM	5/17	91/177	0.3509		1	BovineHD0100018320	1	2	REC	0/22	11/257	1
1	BTB-00033090	64193131	2	0.24	0.2804	1	0.6222	0.8102		1	BTB-00033090	2	1	DOM	10/15	131/140	0.5313		1	BTB-00033090	2	1	REC	2/23	21/250	1
1	BovineHD0100018326	64201222	2	0.1739	0.187	1	1	0.9151		1	BovineHD0100018326	2	1	DOM	7/16	92/178	0.8212		1	BovineHD0100018326	2	1	REC	1/22	9/261	0.5643
1	BTB-00033167	64268930	2	0.16	0.19	1	0.7073	0.8118		1	BTB-00033167	2	1	DOM	8/17	94/177	1		1	BTB-00033167	2	1	REC	0/25	9/262	1
1	BTB-00026837	64391625	2	0.24	0.2915	1	0.5154	0.7675		1	BTB-00026837	2	1	DOM	12/13	138/133	0.8363		1	BTB-00026837	2	1	REC	0/25	20/251	0.393
1	BovineHD0100018387	64403989	1	0.52	0.4389	2	0.2993	1.385		1	BovineHD0100018387	1	2	DOM	18/7	190/80	1		1	BovineHD0100018387	1	2	REC	8/17	47/223	0.1025
1	ARS-BFGL-NGS-33635	64483369	2	0.4	0.4465	1	0.5551	0.8264		1	ARS-BFGL-NGS-33635	2	1	DOM	15/10	191/80	0.3628		1	ARS-BFGL-NGS-33635	2	1	REC	5/20	51/220	0.7954
1	BTB-00027056	64527662	1	0.62	0.4834	2	0.07602	1.744		1	BTB-00027056	1	2	DOM	22/3	196/75	0.1007		1	BTB-00027056	1	2	REC	9/16	66/205	0.2298
1	BovineHD0100018415	64547926	1	0.3478	0.4704	2	0.1243	0.6005		1	BovineHD0100018415	1	2	DOM	14/9	191/79	0.3468		1	BovineHD0100018415	1	2	REC	2/21	63/207	0.1225
1	BovineHD0100018416	64552297	1	0.2174	0.2778	2	0.4905	0.7222		1	BovineHD0100018416	1	2	DOM	10/13	138/132	0.521		1	BovineHD0100018416	1	2	REC	0/23	12/258	0.6083
1	BTA-15412-no-rs	64572534	2	0.04	0.02768	1	0.6472	1.464		1	BTA-15412-no-rs	2	1	DOM	2/23	15/256	0.6442		1	BTA-15412-no-rs	2	1	REC	0/25	0/271	1
1	ARS-BFGL-NGS-112600	64627775	2	0.62	0.4779	1	0.05633	1.783		1	ARS-BFGL-NGS-112600	2	1	DOM	22/3	196/75	0.1007		1	ARS-BFGL-NGS-112600	2	1	REC	9/16	63/208	0.2205
1	BovineHD0100018434	64645261	2	0.42	0.4424	1	0.8818	0.9128		1	BovineHD0100018434	2	1	DOM	17/8	187/82	0.825		1	BovineHD0100018434	2	1	REC	4/21	51/218	1
1	BTB-00027149	64679107	2	0.32	0.476	1	0.0381	0.518		1	BTB-00027149	2	1	DOM	15/10	198/73	0.1691		1	BTB-00027149	2	1	REC	1/24	60/211	0.03598
1	BTB-00027201	64736792	2	0.3	0.3948	1	0.2253	0.6569		1	BTB-00027201	2	1	DOM	14/11	175/96	0.3931		1	BTB-00027201	2	1	REC	1/24	39/232	0.221
1	BovineHD0100018462	64769230	1	0.08696	0.1315	2	0.4945	0.6291		1	BovineHD0100018462	1	2	DOM	4/19	65/205	0.6121		1	BovineHD0100018462	1	2	REC	0/23	6/264	1
1	BovineHD0100018473	64823955	1	0.3	0.4015	2	0.1755	0.6389		1	BovineHD0100018473	1	2	DOM	14/11	177/92	0.3818		1	BovineHD0100018473	1	2	REC	1/24	39/230	0.2212
1	BTB-00027298	64831957	2	0.08	0.131	1	0.3786	0.5769		1	BTB-00027298	2	1	DOM	4/21	65/206	0.4642		1	BTB-00027298	2	1	REC	0/25	6/265	1
1	BTB-00027332	64864876	2	0.06	0.1273	1	0.2546	0.4376		1	BTB-00027332	2	1	DOM	3/22	63/208	0.3132		1	BTB-00027332	2	1	REC	0/25	6/265	1
1	BTB-00027405	64893868	2	0.06	0.0572	1	1	1.052		1	BTB-00027405	2	1	DOM	3/22	31/240	1		1	BTB-00027405	2	1	REC	0/25	0/271	1
1	Hapmap42852-BTA-15416	64920298	1	0.06	0.0572	2	1	1.052		1	Hapmap42852-BTA-15416	1	2	DOM	3/22	31/240	1		1	Hapmap42852-BTA-15416	1	2	REC	0/25	0/271	1
1	BovineHD0100018503	64935538	2	0.3	0.4	1	0.1764	0.6429		1	BovineHD0100018503	2	1	DOM	14/11	177/93	0.3836		1	BovineHD0100018503	2	1	REC	1/24	39/231	0.2211
1	Hapmap32539-BTA-124026	64978225	1	0.06	0.0572	2	1	1.052		1	Hapmap32539-BTA-124026	1	2	DOM	3/22	31/240	1		1	Hapmap32539-BTA-124026	1	2	REC	0/25	0/271	1
1	Hapmap55251-rs29014781	65022321	1	0.24	0.3893	2	0.04653	0.4954		1	Hapmap55251-rs29014781	1	2	DOM	12/13	175/96	0.1287		1	Hapmap55251-rs29014781	1	2	REC	0/25	36/235	0.05414
1	BovineHD0100018526	65041833	1	0.04545	0.1059	2	0.2975	0.4018		1	BovineHD0100018526	1	2	DOM	2/20	56/213	0.2684		1	BovineHD0100018526	1	2	REC	0/22	1/268	1
1	BTA-15421-no-rs	65061689	1	0.24	0.387	2	0.04665	0.5001		1	BTA-15421-no-rs	1	2	DOM	12/13	174/96	0.1293		1	BTA-15421-no-rs	1	2	REC	0/25	35/235	0.05459
1	BovineHD0100018538	65090781	1	0.1591	0.2602	2	0.1525	0.5378		1	BovineHD0100018538	1	2	DOM	7/15	125/144	0.2652		1	BovineHD0100018538	1	2	REC	0/22	15/254	0.614
1	BovineHD0100018540	65098749	2	0.2609	0.3907	1	0.08453	0.5503		1	BovineHD0100018540	2	1	DOM	12/11	175/95	0.2606		1	BovineHD0100018540	2	1	REC	0/23	36/234	0.09049
1	BovineHD0100018544	65119095	2	0.2609	0.3885	1	0.1124	0.5556		1	BovineHD0100018544	2	1	DOM	12/11	174/95	0.2617		1	BovineHD0100018544	2	1	REC	0/23	35/234	0.08913
1	BTB-00027516	65165222	1	0.1	0.1587	2	0.4105	0.5891		1	BTB-00027516	1	2	DOM	5/20	81/190	0.3631		1	BTB-00027516	1	2	REC	0/25	5/266	1
1	BovineHD0100018558	65173401	2	0.28	0.4315	1	0.0505	0.5124		1	BovineHD0100018558	2	1	DOM	14/11	192/78	0.1697		1	BovineHD0100018558	2	1	REC	0/25	41/229	0.03242
1	ARS-BFGL-NGS-61496	65216449	1	0.1522	0.1926	2	0.6946	0.7525		1	ARS-BFGL-NGS-61496	1	2	DOM	7/16	90/180	1		1	ARS-BFGL-NGS-61496	1	2	REC	0/23	14/256	0.6119
1	ARS-BFGL-NGS-83021	65333436	2	0.58	0.4613	1	0.1382	1.613		1	ARS-BFGL-NGS-83021	2	1	DOM	22/3	192/79	0.09939		1	ARS-BFGL-NGS-83021	2	1	REC	7/18	58/213	0.4523
1	BovineHD0100018613	65366689	2	0.42	0.25	1	0.01191	2.172		1	BovineHD0100018613	2	1	DOM	19/6	121/149	0.003141		1	BovineHD0100018613	2	1	REC	2/23	14/256	0.6342
1	BTB-02069463	65413028	2	0.44	0.3524	1	0.2215	1.444		1	BTB-02069463	2	1	DOM	19/6	158/113	0.09228		1	BTB-02069463	2	1	REC	3/22	33/238	1
1	ARS-BFGL-NGS-3996	65517170	2	0.38	0.4576	1	0.3033	0.7266		1	ARS-BFGL-NGS-3996	2	1	DOM	18/7	193/78	1		1	ARS-BFGL-NGS-3996	2	1	REC	1/24	55/216	0.05851
1	ARS-BFGL-NGS-115763	65535489	1	0.46	0.5	2	0.6583	0.8519		1	ARS-BFGL-NGS-115763	1	2	DOM	20/5	207/64	0.8082		1	ARS-BFGL-NGS-115763	1	2	REC	3/22	64/207	0.2205
1	ARS-BFGL-NGS-43799	65583709	2	0.26	0.3413	1	0.2755	0.678		1	ARS-BFGL-NGS-43799	2	1	DOM	11/14	154/117	0.2927		1	ARS-BFGL-NGS-43799	2	1	REC	2/23	31/240	1
1	Hapmap40403-BTA-15429	65625274	1	0.44	0.4742	2	0.6602	0.8713		1	Hapmap40403-BTA-15429	1	2	DOM	17/8	195/76	0.6493		1	Hapmap40403-BTA-15429	1	2	REC	5/20	62/209	1
1	ARS-BFGL-BAC-19439	65647815	2	0.04	0.04244	1	1	0.9402		1	ARS-BFGL-BAC-19439	2	1	DOM	2/23	23/248	1		1	ARS-BFGL-BAC-19439	2	1	REC	0/25	0/271	1
1	ARS-BFGL-BAC-19440	65738282	1	0.08	0.107	2	0.8084	0.7256		1	ARS-BFGL-BAC-19440	1	2	DOM	4/21	57/214	0.796		1	ARS-BFGL-BAC-19440	1	2	REC	0/25	1/270	1
1	BTB-00027638	65763047	1	0.56	0.4631	2	0.2361	1.476		1	BTB-00027638	1	2	DOM	20/5	188/83	0.3615		1	BTB-00027638	1	2	REC	8/17	63/208	0.3324
1	ARS-BFGL-NGS-111569	65792796	1	0.32	0.4151	2	0.2292	0.663		1	ARS-BFGL-NGS-111569	1	2	DOM	13/12	178/93	0.1927		1	ARS-BFGL-NGS-111569	1	2	REC	3/22	47/224	0.7796
1	BovineHD0100018708	65801483	2	0.58	0.466	1	0.1393	1.582		1	BovineHD0100018708	2	1	DOM	20/5	199/66	0.8079		1	BovineHD0100018708	2	1	REC	9/16	48/217	0.0604
1	BovineHD0100018723	65838513	2	0.32	0.4151	1	0.2292	0.663		1	BovineHD0100018723	2	1	DOM	13/12	178/93	0.1927		1	BovineHD0100018723	2	1	REC	3/22	47/224	0.7796
1	BovineHD0100018775	65943436	2	0.52	0.4185	1	0.1803	1.505		1	BovineHD0100018775	2	1	DOM	21/4	186/84	0.1688		1	BovineHD0100018775	2	1	REC	5/20	40/230	0.5584
1	BovineHD0100018783	65952684	2	0.26	0.3284	1	0.3478	0.7187		1	BovineHD0100018783	2	1	DOM	11/14	152/116	0.2927		1	BovineHD0100018783	2	1	REC	2/23	24/244	1
1	BTA-33604-no-rs	66059883	1	0.52	0.4188	2	0.1805	1.503		1	BTA-33604-no-rs	1	2	DOM	21/4	186/85	0.1694		1	BTA-33604-no-rs	1	2	REC	5/20	41/230	0.5623
1	ARS-BFGL-NGS-117561	66087781	2	0.46	0.3339	1	0.0868	1.699		1	ARS-BFGL-NGS-117561	2	1	DOM	20/5	153/118	0.03212		1	ARS-BFGL-NGS-117561	2	1	REC	3/22	28/243	0.7346
1	BovineHD0100018849	66092451	1	0.18	0.2463	2	0.3869	0.6718		1	BovineHD0100018849	1	2	DOM	9/16	111/157	0.6743		1	BovineHD0100018849	1	2	REC	0/25	21/247	0.2342
1	ARS-BFGL-NGS-14087	66112842	2	0.08	0.06273	1	0.551	1.299		1	ARS-BFGL-NGS-14087	2	1	DOM	4/21	33/238	0.5325		1	ARS-BFGL-NGS-14087	2	1	REC	0/25	1/270	1
1	BovineHD4100000370	66133173	1	0.24	0.3513	2	0.1215	0.5831		1	BovineHD4100000370	1	2	DOM	10/15	157/112	0.09211		1	BovineHD4100000370	1	2	REC	2/23	32/237	0.7507
1	Hapmap54041-ss46526276	66150690	1	0.54	0.3948	2	0.05101	1.799		1	Hapmap54041-ss46526276	1	2	DOM	22/3	176/95	0.02441		1	Hapmap54041-ss46526276	1	2	REC	5/20	38/233	0.3823
1	BovineHD0100018869	66184432	1	0.54	0.3289	2	0.004656	2.395		1	BovineHD0100018869	1	2	DOM	22/3	154/109	0.004354		1	BovineHD0100018869	1	2	REC	5/20	19/244	0.04422
1	ARS-BFGL-NGS-36705	66188904	2	0.1	0.1771	1	0.2365	0.5162		1	ARS-BFGL-NGS-36705	2	1	DOM	5/20	86/185	0.2643		1	ARS-BFGL-NGS-36705	2	1	REC	0/25	10/261	1
1	BovineHD0100018875	66211180	2	0.36	0.4871	1	0.1033	0.5923		1	BovineHD0100018875	2	1	DOM	16/9	208/63	0.2205		1	BovineHD0100018875	2	1	REC	2/23	56/215	0.1864
1	Hapmap51211-BTA-33586	66258464	2	0.06	0.03321	1	0.4094	1.858		1	Hapmap51211-BTA-33586	2	1	DOM	3/22	18/253	0.4024		1	Hapmap51211-BTA-33586	2	1	REC	0/25	0/271	1
1	BovineHD0100018903	66364954	2	0.08	0.1089	1	0.6387	0.7119		1	BovineHD0100018903	2	1	DOM	4/21	57/214	0.796		1	BovineHD0100018903	2	1	REC	0/25	2/269	1
1	BovineHD0100018914	66441391	2	0.1	0.2159	1	0.06593	0.4036		1	BovineHD0100018914	2	1	DOM	5/20	104/167	0.08344		1	BovineHD0100018914	2	1	REC	0/25	13/258	0.6114
1	ARS-BFGL-NGS-103348	66454562	2	0.06	0.02399	1	0.1453	2.597		1	ARS-BFGL-NGS-103348	2	1	DOM	3/22	13/258	0.1428		1	ARS-BFGL-NGS-103348	2	1	REC	0/25	0/271	1
1	BTB-00032648	66515809	1	0.16	0.19	2	0.7073	0.8118		1	BTB-00032648	1	2	DOM	7/18	95/176	0.5196		1	BTB-00032648	1	2	REC	1/24	8/263	0.5532
1	BovineHD0100018938	66539914	1	0.56	0.441	2	0.1368	1.614		1	BovineHD0100018938	1	2	DOM	22/3	182/89	0.04012		1	BovineHD0100018938	1	2	REC	6/19	57/214	0.7983
1	BTB-00033186	66560130	2	0.38	0.4834	1	0.1839	0.655		1	BTB-00033186	2	1	DOM	16/9	197/74	0.3583		1	BTB-00033186	2	1	REC	3/22	65/206	0.2189
1	ARS-BFGL-NGS-4572	66612166	1	0.54	0.4539	2	0.2994	1.413		1	ARS-BFGL-NGS-4572	1	2	DOM	21/4	193/78	0.2427		1	ARS-BFGL-NGS-4572	1	2	REC	6/19	53/218	0.6027
1	BTB-00032574	66657113	2	0.06	0.08118	1	0.7872	0.7224		1	BTB-00032574	2	1	DOM	3/22	44/227	0.7774		1	BTB-00032574	2	1	REC	0/25	0/271	1
1	ARS-BFGL-NGS-6075	66686171	2	0.28	0.321	1	0.6352	0.8225		1	ARS-BFGL-NGS-6075	2	1	DOM	12/13	153/118	0.5286		1	ARS-BFGL-NGS-6075	2	1	REC	2/23	21/250	1
1	BTB-00026096	66710186	1	0.28	0.3524	2	0.353	0.7147		1	BTB-00026096	1	2	DOM	12/13	163/108	0.2888		1	BTB-00026096	1	2	REC	2/23	28/243	1
1	BTB-00026110	66731706	2	0.1	0.07934	1	0.5872	1.289		1	BTB-00026110	2	1	DOM	4/21	41/230	1		1	BTB-00026110	2	1	REC	1/24	2/269	0.2333
1	BTA-31636-no-rs	66799487	2	0.56	0.3782	1	0.01507	2.092		1	BTA-31636-no-rs	2	1	DOM	20/5	171/100	0.1252		1	BTA-31636-no-rs	2	1	REC	8/17	34/237	0.01427
1	BTA-05186-no-rs	66862192	2	0.36	0.2066	1	0.01903	2.16		1	BTA-05186-no-rs	2	1	DOM	17/8	103/168	0.004983		1	BTA-05186-no-rs	2	1	REC	1/24	9/262	0.5921
1	BTB-00028704	66890930	2	0.36	0.1531	1	0.000631	3.111		1	BTB-00028704	2	1	DOM	17/8	77/194	0.0001528		1	BTB-00028704	2	1	REC	1/24	6/265	0.4644
1	BovineHD0100019073	67069288	1	0.12	0.1089	2	0.8127	1.116		1	BovineHD0100019073	1	2	DOM	6/19	55/216	0.6128		1	BovineHD0100019073	1	2	REC	0/25	4/267	1
1	UA-IFASA-7116	67101935	2	0.12	0.1144	1	0.8192	1.056		1	UA-IFASA-7116	2	1	DOM	6/19	59/212	0.802		1	UA-IFASA-7116	2	1	REC	0/25	3/268	1
1	BTB-00032205	67133845	1	0.16	0.1365	2	0.6681	1.205		1	BTB-00032205	1	2	DOM	8/17	70/201	0.4847		1	BTB-00032205	1	2	REC	0/25	4/267	1
1	BTB-00032200	67163792	2	0.28	0.2897	1	1	0.9536		1	BTB-00032200	2	1	DOM	12/13	139/132	0.8357		1	BTB-00032200	2	1	REC	2/23	18/253	0.6807
1	BTB-00032163	67192418	1	0.58	0.4207	2	0.03637	1.902		1	BTB-00032163	1	2	DOM	20/5	179/92	0.1858		1	BTB-00032163	1	2	REC	9/16	49/222	0.06037
1	BTB-00032153	67213671	1	0.14	0.1808	2	0.5647	0.7375		1	BTB-00032153	1	2	DOM	6/19	90/181	0.5032		1	BTB-00032153	1	2	REC	1/24	8/263	0.5532
1	BovineHD0100019121	67264350	2	0.32	0.3396	1	0.8762	0.9153		1	BovineHD0100019121	2	1	DOM	13/12	155/113	0.6734		1	BovineHD0100019121	2	1	REC	3/22	27/241	0.73
1	Hapmap58284-rs29018937	67284880	1	0.52	0.3801	2	0.06839	1.767		1	Hapmap58284-rs29018937	1	2	DOM	19/6	164/107	0.1388		1	Hapmap58284-rs29018937	1	2	REC	7/18	42/229	0.1535
1	BTA-33571-no-rs	67309126	1	0.14	0.1808	2	0.5647	0.7375		1	BTA-33571-no-rs	1	2	DOM	6/19	90/181	0.5032		1	BTA-33571-no-rs	1	2	REC	1/24	8/263	0.5532
1	BovineHD0100019150	67330069	2	0.42	0.4871	1	0.379	0.7625		1	BovineHD0100019150	2	1	DOM	17/8	210/61	0.3224		1	BovineHD0100019150	2	1	REC	4/21	54/217	0.7953
1	ARS-BFGL-NGS-119133	67369224	1	0.12	0.2528	2	0.03786	0.4031		1	ARS-BFGL-NGS-119133	1	2	DOM	6/19	124/147	0.03746		1	ARS-BFGL-NGS-119133	1	2	REC	0/25	13/258	0.6114
1	Hapmap41826-BTA-31654	67423265	2	0.38	0.4576	1	0.3033	0.7266		1	Hapmap41826-BTA-31654	2	1	DOM	16/9	193/78	0.4929		1	Hapmap41826-BTA-31654	2	1	REC	3/22	55/216	0.4335
1	BovineHD0100019190	67444738	1	0.12	0.1343	2	1	0.8788		1	BovineHD0100019190	1	2	DOM	5/20	71/197	0.6347		1	BovineHD0100019190	1	2	REC	1/24	1/267	0.1636
1	ARS-BFGL-NGS-117312	67466120	1	0.6	0.4705	2	0.103	1.688		1	ARS-BFGL-NGS-117312	1	2	DOM	22/3	206/65	0.2189		1	ARS-BFGL-NGS-117312	1	2	REC	8/17	49/222	0.1102
1	BovineHD0100019214	67502529	1	0.52	0.3616	2	0.03234	1.912		1	BovineHD0100019214	1	2	DOM	22/3	168/103	0.00854		1	BovineHD0100019214	1	2	REC	4/21	28/243	0.3283
1	Hapmap59754-rs29024892	67577109	2	0.28	0.3856	1	0.17	0.6196		1	Hapmap59754-rs29024892	2	1	DOM	12/13	173/98	0.1334		1	Hapmap59754-rs29024892	2	1	REC	2/23	36/235	0.7534
1	ARS-BFGL-NGS-7521	67672926	1	0.34	0.4299	2	0.2347	0.6832		1	ARS-BFGL-NGS-7521	1	2	DOM	15/10	186/85	0.3781		1	ARS-BFGL-NGS-7521	1	2	REC	2/23	47/224	0.3958
1	ARS-BFGL-NGS-4503	67711822	2	0.58	0.4649	1	0.1391	1.589		1	ARS-BFGL-NGS-4503	2	1	DOM	23/2	197/74	0.03273		1	ARS-BFGL-NGS-4503	2	1	REC	6/19	55/216	0.6128
1	BovineHD0100019327	67798278	1	0.48	0.2668	2	0.002762	2.537		1	BovineHD0100019327	1	2	DOM	20/5	126/142	0.001574		1	BovineHD0100019327	1	2	REC	4/21	17/251	0.09094
1	Hapmap46988-BTA-34591	67805608	1	0.14	0.1347	2	0.8314	1.046		1	Hapmap46988-BTA-34591	1	2	DOM	7/18	67/204	0.8093		1	Hapmap46988-BTA-34591	1	2	REC	0/25	6/265	1
1	ARS-BFGL-NGS-111491	67859165	2	0.36	0.3635	1	1	0.9851		1	ARS-BFGL-NGS-111491	2	1	DOM	16/9	164/107	0.8322		1	ARS-BFGL-NGS-111491	2	1	REC	2/23	33/238	0.7505
1	Hapmap50666-BTA-34589	67935062	2	0.36	0.3635	1	1	0.9851		1	Hapmap50666-BTA-34589	2	1	DOM	16/9	164/107	0.8322		1	Hapmap50666-BTA-34589	2	1	REC	2/23	33/238	0.7505
1	Hapmap39647-BTA-34584	68006692	2	0.14	0.1365	1	1	1.03		1	Hapmap39647-BTA-34584	2	1	DOM	7/18	67/204	0.8093		1	Hapmap39647-BTA-34584	2	1	REC	0/25	7/264	1
1	BovineHD0100019390	68014145	2	0.3	0.5056	1	0.007264	0.4192		1	BovineHD0100019390	2	1	DOM	14/11	202/68	0.05723		1	BovineHD0100019390	2	1	REC	1/24	71/199	0.0128
1	BovineHD0100019406	68043046	2	0.1	0.07463	1	0.5745	1.378		1	BovineHD0100019406	2	1	DOM	4/21	40/228	0.7766		1	BovineHD0100019406	2	1	REC	1/24	0/268	0.08532
1	BovineHD0100019431	68110104	2	0.08	0.04244	1	0.2733	1.962		1	BovineHD0100019431	2	1	DOM	4/21	22/249	0.2547		1	BovineHD0100019431	2	1	REC	0/25	1/270	1
1	BovineHD0100019449	68187404	1	0.54	0.3526	2	0.01342	2.155		1	BovineHD0100019449	1	2	DOM	20/5	149/119	0.01979		1	BovineHD0100019449	1	2	REC	7/18	40/228	0.09386
1	BovineHD0100019456	68229277	2	0.58	0.4373	1	0.05491	1.777		1	BovineHD0100019456	2	1	DOM	21/4	180/91	0.07723		1	BovineHD0100019456	2	1	REC	8/17	57/214	0.2115
1	BovineHD0100019464	68248079	1	0.3125	0.2729	2	0.613	1.211		1	BovineHD0100019464	1	2	DOM	14/10	118/144	0.2848		1	BovineHD0100019464	1	2	REC	1/23	25/237	0.7085
1	BovineHD0100019472	68267076	1	0.38	0.4422	2	0.4571	0.7732		1	BovineHD0100019472	1	2	DOM	17/8	188/80	0.8219		1	BovineHD0100019472	1	2	REC	2/23	49/219	0.2729
1	ARS-BFGL-NGS-31379	68286354	1	0.4	0.4613	2	0.4595	0.7787		1	ARS-BFGL-NGS-31379	1	2	DOM	18/7	196/75	1		1	ARS-BFGL-NGS-31379	1	2	REC	2/23	54/217	0.1867
1	BovineHD0100019485	68293671	2	0.02083	0.01908	1	1	1.094		1	BovineHD0100019485	2	1	DOM	1/23	10/252	1		1	BovineHD0100019485	2	1	REC	0/24	0/262	1
1	BovineHD0100019488	68304713	1	0.4	0.4557	2	0.4626	0.7962		1	BovineHD0100019488	1	2	DOM	18/7	193/78	1		1	BovineHD0100019488	1	2	REC	2/23	54/217	0.1867
1	ARS-BFGL-NGS-26771	68417680	1	0.34	0.3376	2	1	1.011		1	ARS-BFGL-NGS-26771	1	2	DOM	15/10	151/120	0.8337		1	ARS-BFGL-NGS-26771	1	2	REC	2/23	32/239	0.751
1	ARS-BFGL-NGS-100745	68440795	2	0.44	0.441	1	1	0.9961		1	ARS-BFGL-NGS-100745	2	1	DOM	16/9	184/87	0.6625		1	ARS-BFGL-NGS-100745	2	1	REC	6/19	55/216	0.6128
1	BTA-120514-no-rs	68465551	2	0.22	0.1624	1	0.321	1.455		1	BTA-120514-no-rs	2	1	DOM	10/15	81/190	0.3646		1	BTA-120514-no-rs	2	1	REC	1/24	7/264	0.5107
1	BovineHD0100019566	68492520	2	0.52	0.4945	1	0.7689	1.108		1	BovineHD0100019566	2	1	DOM	20/5	200/71	0.635		1	BovineHD0100019566	2	1	REC	6/19	68/203	1
1	Hapmap54911-rs29023069	68532921	1	0.48	0.4982	2	0.8828	0.9299		1	Hapmap54911-rs29023069	1	2	DOM	18/7	201/70	0.8136		1	Hapmap54911-rs29023069	1	2	REC	6/19	69/202	1
1	BovineHD0100019589	68572324	1	0.26	0.3081	2	0.5246	0.789		1	BovineHD0100019589	1	2	DOM	11/14	141/130	0.5321		1	BovineHD0100019589	1	2	REC	2/23	26/245	1
1	ARS-BFGL-NGS-118460	68596030	2	0.12	0.1421	1	0.8322	0.8235		1	ARS-BFGL-NGS-118460	2	1	DOM	6/19	74/197	0.8177		1	ARS-BFGL-NGS-118460	2	1	REC	0/25	3/268	1
1	ARS-BFGL-NGS-118306	68623214	1	0.26	0.3118	2	0.5233	0.7755		1	ARS-BFGL-NGS-118306	1	2	DOM	11/14	143/128	0.4125		1	ARS-BFGL-NGS-118306	1	2	REC	2/23	26/245	1
1	ARS-BFGL-NGS-114985	68682461	1	0.36	0.4096	2	0.549	0.8108		1	ARS-BFGL-NGS-114985	1	2	DOM	15/10	178/93	0.6615		1	ARS-BFGL-NGS-114985	1	2	REC	3/22	44/227	0.7774
1	BovineHD0100019679	68712546	2	0.54	0.3967	1	0.05191	1.785		1	BovineHD0100019679	2	1	DOM	20/5	175/96	0.1844		1	BovineHD0100019679	2	1	REC	7/18	40/231	0.09066
1	BTA-104027-no-rs	68757940	1	0.18	0.1015	2	0.09576	1.944		1	BTA-104027-no-rs	1	2	DOM	9/16	51/220	0.06422		1	BTA-104027-no-rs	1	2	REC	0/25	4/267	1
1	BovineHD0100019701	68778928	2	0.1458	0.1455	1	1	1.003		1	BovineHD0100019701	2	1	DOM	5/19	70/198	0.8074		1	BovineHD0100019701	2	1	REC	2/22	8/260	0.1943
1	ARS-BFGL-NGS-115898	68784544	2	0.32	0.5092	1	0.01174	0.4535		1	ARS-BFGL-NGS-115898	2	1	DOM	14/11	208/63	0.0295		1	ARS-BFGL-NGS-115898	2	1	REC	2/23	68/203	0.08149
1	BovineHD0100019706	68792344	2	0.02083	0.02037	1	1	1.023		1	BovineHD0100019706	2	1	DOM	1/23	11/259	1		1	BovineHD0100019706	2	1	REC	0/24	0/270	1
1	BovineHD0100019715	68801039	1	0.24	0.1421	2	0.09445	1.907		1	BovineHD0100019715	1	2	DOM	12/13	69/202	0.03202		1	BovineHD0100019715	1	2	REC	0/25	8/263	1
1	AX-18260553	68863963	1	0.34	0.2454	2	0.1728	1.584		1	AX-18260553	1	2	DOM	14/11	116/155	0.2139		1	AX-18260553	1	2	REC	3/22	17/254	0.2321
1	Hapmap38055-BTA-120751	68873131	2	0.12	0.1255	1	1	0.9505		1	Hapmap38055-BTA-120751	2	1	DOM	6/19	65/206	1		1	Hapmap38055-BTA-120751	2	1	REC	0/25	3/268	1
1	BovineHD0100019760	68874880	1	0.3478	0.2407	2	0.1121	1.683		1	BovineHD0100019760	1	2	DOM	13/10	113/155	0.1953		1	BovineHD0100019760	1	2	REC	3/20	16/252	0.181
1	BovineHD0100019784	68908189	1	0.32	0.2306	2	0.1662	1.57		1	BovineHD0100019784	1	2	DOM	13/12	110/161	0.2938		1	BovineHD0100019784	1	2	REC	3/22	15/256	0.1859
1	BovineHD0100019804	68949628	2	0.1042	0.08889	1	0.7909	1.192		1	BovineHD0100019804	2	1	DOM	4/20	47/223	1		1	BovineHD0100019804	2	1	REC	1/23	1/269	0.1569
1	BovineHD0100019809	68970032	2	0.18	0.1963	1	1	0.8988		1	BovineHD0100019809	2	1	DOM	8/17	96/174	0.8287		1	BovineHD0100019809	2	1	REC	1/24	10/260	1
1	BovineHD0100019833	69009235	1	0.02	0.02952	2	1	0.6709		1	BovineHD0100019833	1	2	DOM	1/24	15/256	1		1	BovineHD0100019833	1	2	REC	0/25	1/270	1
1	BovineHD0100019834	69009734	1	0.02174	0.03731	2	1	0.5733		1	BovineHD0100019834	1	2	DOM	1/22	20/248	1		1	BovineHD0100019834	1	2	REC	0/23	0/268	1
1	BovineHD0100019837	69012232	2	0.02	0.02399	1	1	0.8305		1	BovineHD0100019837	2	1	DOM	1/24	13/258	1		1	BovineHD0100019837	2	1	REC	0/25	0/271	1
1	BTA-33563-no-rs	69016673	2	0.44	0.4299	1	0.8827	1.042		1	BTA-33563-no-rs	2	1	DOM	20/5	190/81	0.3631		1	BTA-33563-no-rs	2	1	REC	2/23	43/228	0.3927
1	BovineHD0100019855	69033809	2	0.02174	0.02052	1	1	1.061		1	BovineHD0100019855	2	1	DOM	1/22	11/257	1		1	BovineHD0100019855	2	1	REC	0/23	0/268	1
1	ARS-USDA-AGIL-chr1-69652189-000148	69047241	1	0.02083	0.0203	2	1	1.027		1	ARS-USDA-AGIL-chr1-69652189-000148	1	2	DOM	1/23	11/260	1		1	ARS-USDA-AGIL-chr1-69652189-000148	1	2	REC	0/24	0/271	1
1	BovineHD0100019878	69055817	2	0.02	0.0203	1	1	0.9852		1	BovineHD0100019878	2	1	DOM	1/24	11/260	1		1	BovineHD0100019878	2	1	REC	0/25	0/271	1
1	Hapmap59820-rs29019798	69085458	2	0.44	0.4262	1	0.8819	1.058		1	Hapmap59820-rs29019798	2	1	DOM	20/5	179/92	0.1858		1	Hapmap59820-rs29019798	2	1	REC	2/23	52/219	0.2757
1	BovineHD0100019911	69102381	2	0.02083	0.02222	1	1	0.9362		1	BovineHD0100019911	2	1	DOM	1/23	12/258	1		1	BovineHD0100019911	2	1	REC	0/24	0/270	1
1	BovineHD0100019936	69152362	1	0.1304	0.1287	2	1	1.015		1	BovineHD0100019936	1	2	DOM	6/17	66/202	0.8066		1	BovineHD0100019936	1	2	REC	0/23	3/265	1
1	BovineHD0100019980	69234197	2	0.125	0.2601	1	0.03733	0.4063		1	BovineHD0100019980	2	1	DOM	6/18	123/148	0.05681		1	BovineHD0100019980	2	1	REC	0/24	18/253	0.3782
1	ARS-BFGL-NGS-62687	69262270	2	0.3	0.4244	1	0.09946	0.5814		1	ARS-BFGL-NGS-62687	2	1	DOM	13/12	178/93	0.1927		1	ARS-BFGL-NGS-62687	2	1	REC	2/23	52/219	0.2757
1	BovineHD0100019998	69266076	2	0.5	0.4649	1	0.6591	1.151		1	BovineHD0100019998	2	1	DOM	20/5	186/85	0.2666		1	BovineHD0100019998	2	1	REC	5/20	66/205	0.8077
1	BovineHD0100020014	69294780	2	0.3478	0.2761	1	0.3081	1.398		1	BovineHD0100020014	2	1	DOM	12/11	129/139	0.8287		1	BovineHD0100020014	2	1	REC	4/19	19/249	0.09505
1	ARS-BFGL-NGS-111716	69299662	1	0.32	0.4373	2	0.1349	0.6056		1	ARS-BFGL-NGS-111716	1	2	DOM	14/11	181/90	0.2788		1	ARS-BFGL-NGS-111716	1	2	REC	2/23	56/215	0.1864
1	BovineHD0100020025	69320032	1	0.38	0.3463	2	0.6439	1.157		1	BovineHD0100020025	1	2	DOM	16/9	156/114	0.6728		1	BovineHD0100020025	1	2	REC	3/22	31/239	1
1	BovineHD0100020044	69372317	2	0.28	0.3432	1	0.4357	0.7443		1	BovineHD0100020044	2	1	DOM	11/14	153/118	0.2936		1	BovineHD0100020044	2	1	REC	3/22	33/238	1
1	BovineHD0100020072	69488001	2	0.36	0.3284	1	0.6407	1.15		1	BovineHD0100020072	2	1	DOM	15/10	150/121	0.6807		1	BovineHD0100020072	2	1	REC	3/22	28/243	0.7346
1	BovineHD0100020089	69551363	1	0.04	0.04613	2	1	0.8617		1	BovineHD0100020089	1	2	DOM	2/23	24/247	1		1	BovineHD0100020089	1	2	REC	0/25	1/270	1
1	ARS-BFGL-NGS-111271	69554315	2	0.3	0.2675	1	0.6197	1.173		1	ARS-BFGL-NGS-111271	2	1	DOM	13/12	130/141	0.8349		1	ARS-BFGL-NGS-111271	2	1	REC	2/23	15/256	0.6442
1	BovineHD0100020090	69554797	1	0.3	0.3717	2	0.359	0.7243		1	BovineHD0100020090	1	2	DOM	12/13	161/108	0.2904		1	BovineHD0100020090	1	2	REC	3/22	39/230	1
1	ARS-BFGL-NGS-111283	69585403	1	0.44	0.4077	2	0.6555	1.141		1	ARS-BFGL-NGS-111283	1	2	DOM	20/5	183/88	0.2618		1	ARS-BFGL-NGS-111283	1	2	REC	2/23	38/233	0.5492
1	BovineHD0100020110	69613858	2	0.4	0.3593	1	0.6449	1.189		1	BovineHD0100020110	2	1	DOM	19/6	165/105	0.1951		1	BovineHD0100020110	2	1	REC	1/24	29/241	0.4892
1	BovineHD0100020122	69664149	2	0.2	0.3444	1	0.04131	0.4758		1	BovineHD0100020122	2	1	DOM	10/15	160/110	0.08901		1	BovineHD0100020122	2	1	REC	0/25	26/244	0.1451
1	BovineHD0100020138	69748359	2	0.16	0.2288	1	0.2929	0.6421		1	BovineHD0100020138	2	1	DOM	7/18	108/163	0.2885		1	BovineHD0100020138	2	1	REC	1/24	16/255	1
1	ARS-BFGL-NGS-103803	69802244	2	0.58	0.3967	1	0.01568	2.1		1	ARS-BFGL-NGS-103803	2	1	DOM	22/3	179/92	0.02504		1	ARS-BFGL-NGS-103803	2	1	REC	7/18	36/235	0.06849
1	BovineHD0100020162	69859758	1	0.38	0.3	2	0.2627	1.43		1	BovineHD0100020162	1	2	DOM	17/8	141/129	0.1467		1	BovineHD0100020162	1	2	REC	2/23	21/249	1
1	Hapmap41227-BTA-32644	69870271	2	0.34	0.2509	1	0.1783	1.538		1	Hapmap41227-BTA-32644	2	1	DOM	15/10	119/152	0.1436		1	Hapmap41227-BTA-32644	2	1	REC	2/23	17/254	0.6679
1	BovineHD0100020179	69931914	1	0.62	0.4154	2	0.006826	2.296		1	BovineHD0100020179	1	2	DOM	22/3	174/92	0.02437		1	BovineHD0100020179	1	2	REC	9/16	47/219	0.03456
1	Hapmap39468-BTA-120746	69942383	1	0.34	0.2519	2	0.1795	1.53		1	Hapmap39468-BTA-120746	1	2	DOM	15/10	119/151	0.1446		1	Hapmap39468-BTA-120746	1	2	REC	2/23	17/253	0.6687
1	BovineHD0100020187	69979144	2	0.62	0.4185	1	0.007095	2.267		1	BovineHD0100020187	2	1	DOM	22/3	178/92	0.02487		1	BovineHD0100020187	2	1	REC	9/16	48/222	0.03538
1	BovineHD0100020191	70001473	2	0.3125	0.1648	1	0.01645	2.304		1	BovineHD0100020191	2	1	DOM	13/11	81/186	0.02238		1	BovineHD0100020191	2	1	REC	2/22	7/260	0.1643
1	BTB-00031796	70049185	2	0.34	0.2472	1	0.1743	1.569		1	BTB-00031796	2	1	DOM	15/10	117/154	0.1404		1	BTB-00031796	2	1	REC	2/23	17/254	0.6679
1	Hapmap59145-ss46526952	70228691	2	0.4	0.2897	1	0.1085	1.635		1	Hapmap59145-ss46526952	2	1	DOM	17/8	143/128	0.2076		1	Hapmap59145-ss46526952	2	1	REC	3/22	14/257	0.1639
1	Hapmap50667-BTA-34616	70362584	2	0.16	0.1974	1	0.7083	0.7744		1	Hapmap50667-BTA-34616	2	1	DOM	8/17	96/175	0.8289		1	Hapmap50667-BTA-34616	2	1	REC	0/25	11/260	0.6078
1	ARS-BFGL-NGS-80523	70384365	1	0.56	0.4834	2	0.3057	1.36		1	ARS-BFGL-NGS-80523	1	2	DOM	20/5	196/75	0.4876		1	ARS-BFGL-NGS-80523	1	2	REC	8/17	66/205	0.4685
1	BovineHD0100020322	70392743	2	0.42	0.3074	1	0.1128	1.631		1	BovineHD0100020322	2	1	DOM	17/8	148/122	0.2923		1	BovineHD0100020322	2	1	REC	4/21	18/252	0.1027
1	BovineHD0100020325	70398856	2	0.52	0.3941	1	0.09748	1.666		1	BovineHD0100020325	2	1	DOM	19/6	175/94	0.3776		1	BovineHD0100020325	2	1	REC	7/18	37/232	0.07452
1	BovineHD0100020329	70404106	1	0.52	0.3963	2	0.09867	1.65		1	BovineHD0100020329	1	2	DOM	19/6	176/94	0.3776		1	BovineHD0100020329	1	2	REC	7/18	38/232	0.07915
1	BovineHD0100020334	70412669	2	0.52	0.3941	1	0.09748	1.666		1	BovineHD0100020334	2	1	DOM	19/6	175/94	0.3776		1	BovineHD0100020334	2	1	REC	7/18	37/232	0.07452
1	BovineHD0100020342	70429089	1	0.16	0.1283	2	0.5119	1.295		1	BovineHD0100020342	1	2	DOM	8/17	64/205	0.3417		1	BovineHD0100020342	1	2	REC	0/25	5/264	1
1	ARS-BFGL-NGS-119161	70459221	2	0.5	0.4834	1	0.8829	1.069		1	ARS-BFGL-NGS-119161	2	1	DOM	21/4	197/74	0.3415		1	ARS-BFGL-NGS-119161	2	1	REC	4/21	65/206	0.4642
1	BovineHD0100020373	70493042	2	0.44	0.4275	1	0.8821	1.052		1	BovineHD0100020373	2	1	DOM	18/7	186/83	1		1	BovineHD0100020373	2	1	REC	4/21	44/225	1
1	BovineHD0100020392	70523321	2	0.5	0.4925	1	1	1.03		1	BovineHD0100020392	2	1	DOM	21/4	199/69	0.3418		1	BovineHD0100020392	2	1	REC	4/21	65/203	0.4634
1	BovineHD0100020393	70527905	1	0.2	0.2325	2	0.726	0.8254		1	BovineHD0100020393	1	2	DOM	9/16	110/161	0.8316		1	BovineHD0100020393	1	2	REC	1/24	16/255	1
1	BovineHD0100020394	70532358	2	0.24	0.3086	1	0.3396	0.7077		1	BovineHD0100020394	2	1	DOM	12/13	148/121	0.5343		1	BovineHD0100020394	2	1	REC	0/25	18/251	0.3806
1	BovineHD0100020415	70559726	1	0.3	0.3653	2	0.4417	0.7446		1	BovineHD0100020415	1	2	DOM	15/10	173/98	0.8285		1	BovineHD0100020415	1	2	REC	0/25	25/246	0.1466
1	ARS-BFGL-NGS-95516	70621981	2	0.3	0.369	1	0.3605	0.7329		1	ARS-BFGL-NGS-95516	2	1	DOM	13/12	168/103	0.3921		1	ARS-BFGL-NGS-95516	2	1	REC	2/23	32/239	0.751
1	ARS-BFGL-NGS-5124	70656139	1	0.52	0.4834	2	0.6591	1.158		1	ARS-BFGL-NGS-5124	1	2	DOM	20/5	205/66	0.8077		1	ARS-BFGL-NGS-5124	1	2	REC	6/19	57/214	0.7983
1	BovineHD0100020477	70735271	2	0.04	0.04428	1	1	0.8993		1	BovineHD0100020477	2	1	DOM	2/23	24/247	1		1	BovineHD0100020477	2	1	REC	0/25	0/271	1
1	ARS-BFGL-BAC-35332	70741856	2	0.36	0.3376	1	0.7565	1.103		1	ARS-BFGL-BAC-35332	2	1	DOM	16/9	156/115	0.6727		1	ARS-BFGL-BAC-35332	2	1	REC	2/23	27/244	1
1	ARS-BFGL-NGS-97095	70823693	2	0.28	0.2232	1	0.3791	1.353		1	ARS-BFGL-NGS-97095	2	1	DOM	13/12	112/159	0.3977		1	ARS-BFGL-NGS-97095	2	1	REC	1/24	9/262	0.5921
1	Hapmap43841-BTA-34601	70897439	1	0.48	0.4779	2	1	1.009		1	Hapmap43841-BTA-34601	1	2	DOM	18/7	200/71	0.8156		1	Hapmap43841-BTA-34601	1	2	REC	6/19	59/212	0.802
1	AX-18269003	70935289	1	0.2	0.1956	2	1	1.028		1	AX-18269003	1	2	DOM	8/17	95/176	0.8296		1	AX-18269003	1	2	REC	2/23	11/260	0.3017
1	AX-18269029	70941629	1	0.2	0.1956	2	1	1.028		1	AX-18269029	1	2	DOM	8/17	95/176	0.8296		1	AX-18269029	1	2	REC	2/23	11/260	0.3017
1	BovineHD0100020535	70973829	2	0.2	0.1937	1	0.8538	1.04		1	BovineHD0100020535	2	1	DOM	8/17	94/177	1		1	BovineHD0100020535	2	1	REC	2/23	11/260	0.3017
1	BovineHD0100020540	70987820	2	0.26	0.2407	1	0.7325	1.109		1	BovineHD0100020540	2	1	DOM	10/15	111/157	1		1	BovineHD0100020540	2	1	REC	3/22	18/250	0.4045
1	Hapmap40324-BTA-34602	70995564	2	0.2	0.1937	1	0.8538	1.04		1	Hapmap40324-BTA-34602	2	1	DOM	8/17	94/177	1		1	Hapmap40324-BTA-34602	2	1	REC	2/23	11/260	0.3017
1	BTA-34631-no-rs	71013954	1	0.12	0.2111	2	0.144	0.5096		1	BTA-34631-no-rs	1	2	DOM	5/20	100/170	0.1251		1	BTA-34631-no-rs	1	2	REC	1/24	14/256	1
1	BovineHD0100020549	71042439	2	0.14	0.2332	1	0.1575	0.5353		1	BovineHD0100020549	2	1	DOM	7/18	111/157	0.2089		1	BovineHD0100020549	2	1	REC	0/25	14/254	0.6178
1	BovineHD0100020557	71067483	1	0.24	0.3007	2	0.4209	0.7343		1	BovineHD0100020557	1	2	DOM	10/15	135/136	0.4062		1	BovineHD0100020557	1	2	REC	2/23	28/243	1
1	BovineHD0100020562	71083170	2	0.14	0.1439	1	1	0.9684		1	BovineHD0100020562	2	1	DOM	7/18	75/196	1		1	BovineHD0100020562	2	1	REC	0/25	3/268	1
1	ARS-BFGL-NGS-56509	71132759	2	0.38	0.3118	1	0.3423	1.353		1	ARS-BFGL-NGS-56509	2	1	DOM	15/10	140/131	0.5313		1	ARS-BFGL-NGS-56509	2	1	REC	4/21	29/242	0.501
1	ARS-BFGL-NGS-16910	71155649	1	0.08	0.1421	2	0.2844	0.5251		1	ARS-BFGL-NGS-16910	1	2	DOM	4/21	74/197	0.3415		1	ARS-BFGL-NGS-16910	1	2	REC	0/25	3/268	1
1	BovineHD0100020591	71163004	2	0.22	0.1808	1	0.4523	1.278		1	BovineHD0100020591	2	1	DOM	11/14	90/181	0.2788		1	BovineHD0100020591	2	1	REC	0/25	8/263	1
1	BovineHD0100020593	71170757	1	0.22	0.2707	2	0.506	0.76		1	BovineHD0100020593	1	2	DOM	11/14	135/131	0.5383		1	BovineHD0100020593	1	2	REC	0/25	9/257	1
1	BTA-34638-no-rs	71190486	1	0.44	0.4539	2	0.883	0.9454		1	BTA-34638-no-rs	1	2	DOM	17/8	192/79	0.8193		1	BTA-34638-no-rs	1	2	REC	5/20	54/217	1
1	BovineHD0100020624	71301132	2	0.08	0.1426	1	0.2844	0.5229		1	BovineHD0100020624	2	1	DOM	4/21	74/196	0.247		1	BovineHD0100020624	2	1	REC	0/25	3/267	1
1	BTA-120754-no-rs	71322090	1	0.24	0.2638	2	0.8666	0.8811		1	BTA-120754-no-rs	1	2	DOM	11/14	130/141	0.8349		1	BTA-120754-no-rs	1	2	REC	1/24	13/258	1
1	BovineHD0100020633	71338285	1	0.54	0.4815	2	0.462	1.264		1	BovineHD0100020633	1	2	DOM	21/4	195/76	0.2437		1	BovineHD0100020633	1	2	REC	6/19	66/205	1
1	BTA-34624-no-rs	71411178	2	0.24	0.2638	1	0.8666	0.8811		1	BTA-34624-no-rs	2	1	DOM	11/14	130/141	0.8349		1	BTA-34624-no-rs	2	1	REC	1/24	13/258	1
1	Hapmap60655-rs29025422	71442587	2	0.12	0.131	1	1	0.9046		1	Hapmap60655-rs29025422	2	1	DOM	5/20	64/207	0.8082		1	Hapmap60655-rs29025422	2	1	REC	1/24	7/264	0.5107
1	BovineHD4100000414	71443933	1	0.3	0.2167	2	0.2129	1.549		1	BovineHD4100000414	1	2	DOM	14/11	110/160	0.1453		1	BovineHD4100000414	1	2	REC	1/24	7/263	0.512
1	ARS-BFGL-NGS-117761	71471058	2	0.2	0.2343	1	0.7262	0.8169		1	ARS-BFGL-NGS-117761	2	1	DOM	9/16	115/156	0.6727		1	ARS-BFGL-NGS-117761	2	1	REC	1/24	12/259	1
1	ARS-BFGL-NGS-37507	71493393	2	0.08	0.1426	1	0.2844	0.5229		1	ARS-BFGL-NGS-37507	2	1	DOM	4/21	74/196	0.247		1	ARS-BFGL-NGS-37507	2	1	REC	0/25	3/267	1
1	BovineHD0100020685	71566792	2	0.36	0.4777	1	0.1381	0.615		1	BovineHD0100020685	2	1	DOM	16/9	204/65	0.2276		1	BovineHD0100020685	2	1	REC	2/23	53/216	0.1874
1	BovineHD0100020689	71609698	2	0.4	0.4312	1	0.7656	0.8793		1	BovineHD0100020689	2	1	DOM	16/9	189/80	0.5027		1	BovineHD0100020689	2	1	REC	4/21	43/226	1
1	BovineHD0100020706	71741471	2	0.2	0.2796	1	0.25	0.644		1	BovineHD0100020706	2	1	DOM	8/17	132/138	0.1423		1	BovineHD0100020706	2	1	REC	2/23	19/251	0.6949
1	Hapmap51434-BTA-34642	71760764	1	0.2	0.2343	2	0.7262	0.8169		1	Hapmap51434-BTA-34642	1	2	DOM	9/16	115/156	0.6727		1	Hapmap51434-BTA-34642	1	2	REC	1/24	12/259	1
1	ARS-BFGL-NGS-118075	71834357	2	0.48	0.4686	1	0.8835	1.047		1	ARS-BFGL-NGS-118075	2	1	DOM	21/4	197/74	0.3415		1	ARS-BFGL-NGS-118075	2	1	REC	3/22	57/214	0.4346
1	BovineHD0100020739	71877041	2	0.36	0.363	1	1	0.9872		1	BovineHD0100020739	2	1	DOM	14/11	163/107	0.6751		1	BovineHD0100020739	2	1	REC	4/21	33/237	0.5336
1	BovineHD0100020740	71881432	1	0.1458	0.2632	2	0.0835	0.478		1	BovineHD0100020740	1	2	DOM	7/17	125/141	0.133		1	BovineHD0100020740	1	2	REC	0/24	15/251	0.622
1	BovineHD0100020747	71906154	2	0.42	0.3848	1	0.6506	1.158		1	BovineHD0100020747	2	1	DOM	17/8	171/98	0.8282		1	BovineHD0100020747	2	1	REC	4/21	36/233	0.7592
1	BovineHD0100020749	71917411	1	0.1458	0.2622	2	0.08375	0.4805		1	BovineHD0100020749	1	2	DOM	7/17	124/143	0.1339		1	BovineHD0100020749	1	2	REC	0/24	16/251	0.3779
1	BovineHD0100020757	71943334	2	0.16	0.1861	1	0.8484	0.8331		1	BovineHD0100020757	2	1	DOM	8/17	91/175	1		1	BovineHD0100020757	2	1	REC	0/25	8/258	1
1	BovineHD0100020760	71952136	2	0.1	0.1468	1	0.525	0.6456		1	BovineHD0100020760	2	1	DOM	5/20	74/195	0.4883		1	BovineHD0100020760	2	1	REC	0/25	5/264	1
1	BovineHD0100020767	71982562	2	0.18	0.2948	1	0.1014	0.5252		1	BovineHD0100020767	2	1	DOM	9/16	133/135	0.2148		1	BovineHD0100020767	2	1	REC	0/25	25/243	0.1459
1	BovineHD0100020781	72027628	2	0.18	0.2537	1	0.305	0.6456		1	BovineHD0100020781	2	1	DOM	8/17	120/148	0.2922		1	BovineHD0100020781	2	1	REC	1/24	16/252	1
1	ARS-BFGL-NGS-45476	72032606	1	0.12	0.214	2	0.1436	0.5008		1	ARS-BFGL-NGS-45476	1	2	DOM	6/19	106/165	0.1952		1	ARS-BFGL-NGS-45476	1	2	REC	0/25	10/261	1
1	BovineHD0100020803	72074777	2	0.24	0.3672	1	0.08907	0.5443		1	BovineHD0100020803	2	1	DOM	11/14	169/102	0.08732		1	BovineHD0100020803	2	1	REC	1/24	30/241	0.4918
1	ARS-BFGL-NGS-117741	72081243	1	0.4	0.452	2	0.553	0.8082		1	ARS-BFGL-NGS-117741	1	2	DOM	17/8	188/83	1		1	ARS-BFGL-NGS-117741	1	2	REC	3/22	57/214	0.4346
1	Hapmap42521-BTA-35582	72127960	2	0.14	0.214	1	0.275	0.5978		1	Hapmap42521-BTA-35582	2	1	DOM	6/19	109/162	0.1352		1	Hapmap42521-BTA-35582	2	1	REC	1/24	7/264	0.5107
1	Hapmap43559-BTA-35576	72193451	1	0.26	0.3229	2	0.4286	0.7368		1	Hapmap43559-BTA-35576	1	2	DOM	10/15	144/127	0.2181		1	Hapmap43559-BTA-35576	1	2	REC	3/22	31/240	1
1	ARS-BFGL-NGS-72532	72236014	1	0.36	0.2944	2	0.3364	1.348		1	ARS-BFGL-NGS-72532	1	2	DOM	14/11	139/131	0.6824		1	ARS-BFGL-NGS-72532	1	2	REC	4/21	20/250	0.1325
1	ARS-BFGL-NGS-118725	72355134	2	0.26	0.3801	1	0.1249	0.5731		1	ARS-BFGL-NGS-118725	2	1	DOM	11/14	178/93	0.04809		1	ARS-BFGL-NGS-118725	2	1	REC	2/23	28/243	1
1	BovineHD0100020917	72419988	2	0.36	0.1796	1	0.004365	2.569		1	BovineHD0100020917	2	1	DOM	16/9	90/180	0.003826		1	BovineHD0100020917	2	1	REC	2/23	7/263	0.1719
1	BovineHD0100020931	72437297	1	0.5	0.3432	2	0.03093	1.914		1	BovineHD0100020931	1	2	DOM	19/6	157/114	0.09068		1	BovineHD0100020931	1	2	REC	6/19	29/242	0.09558
1	ARS-BFGL-NGS-112042	72470845	1	0.58	0.4742	2	0.1832	1.531		1	ARS-BFGL-NGS-112042	1	2	DOM	19/6	192/79	0.6524		1	ARS-BFGL-NGS-112042	1	2	REC	10/15	65/206	0.09294
1	ARS-BFGL-NGS-100698	72499306	2	0.32	0.4225	1	0.1785	0.6432		1	ARS-BFGL-NGS-100698	2	1	DOM	14/11	183/88	0.2707		1	ARS-BFGL-NGS-100698	2	1	REC	2/23	46/225	0.3934
1	ARS-BFGL-NGS-59448	72533863	2	0.36	0.3524	1	1	1.034		1	ARS-BFGL-NGS-59448	2	1	DOM	14/11	157/114	0.8363		1	ARS-BFGL-NGS-59448	2	1	REC	4/21	34/237	0.5425
1	BovineHD0100021005	72558796	2	0.34	0.3727	1	0.7597	0.8672		1	BovineHD0100021005	2	1	DOM	13/12	165/102	0.3929		1	BovineHD0100021005	2	1	REC	4/21	34/233	0.5478
1	BovineHD0100021012	72576429	2	0.32	0.3745	1	0.5405	0.7859		1	BovineHD0100021012	2	1	DOM	12/13	167/100	0.1973		1	BovineHD0100021012	2	1	REC	4/21	33/234	0.5373
1	BovineHD0100021013	72577120	1	0.34	0.3727	2	0.7597	0.8672		1	BovineHD0100021013	1	2	DOM	13/12	165/102	0.3929		1	BovineHD0100021013	1	2	REC	4/21	34/233	0.5478
1	BovineHD0100021016	72580910	2	0.34	0.3727	1	0.7597	0.8672		1	BovineHD0100021016	2	1	DOM	13/12	165/102	0.3929		1	BovineHD0100021016	2	1	REC	4/21	34/233	0.5478
1	BovineHD0100021018	72592573	2	0.34	0.3727	1	0.7599	0.8671		1	BovineHD0100021018	2	1	DOM	13/12	167/104	0.3942		1	BovineHD0100021018	2	1	REC	4/21	35/236	0.7556
1	Hapmap41511-BTA-34652	72631840	2	0.56	0.4594	1	0.1849	1.498		1	Hapmap41511-BTA-34652	2	1	DOM	22/3	190/81	0.06489		1	Hapmap41511-BTA-34652	2	1	REC	6/19	59/212	0.802
1	BovineHD0100021036	72684320	2	0.28	0.3339	1	0.53	0.7756		1	BovineHD0100021036	2	1	DOM	11/14	153/118	0.2936		1	BovineHD0100021036	2	1	REC	3/22	28/243	0.7346
1	BovineHD0100021037	72688416	2	0.2083	0.3195	1	0.142	0.5604		1	BovineHD0100021037	2	1	DOM	9/15	142/124	0.1429		1	BovineHD0100021037	2	1	REC	1/23	28/238	0.4873
1	BovineHD4100000422	72695403	2	0.25	0.2228	1	0.7182	1.162		1	BovineHD4100000422	2	1	DOM	11/13	103/164	0.5172		1	BovineHD4100000422	2	1	REC	1/23	16/251	1
1	BovineHD0100021041	72703269	2	0.28	0.3321	1	0.5301	0.7821		1	BovineHD0100021041	2	1	DOM	11/14	152/119	0.2951		1	BovineHD0100021041	2	1	REC	3/22	28/243	0.7346
1	BovineHD4100000423	72720904	2	0.5	0.3989	1	0.2195	1.507		1	BovineHD4100000423	2	1	DOM	18/6	170/97	0.3731		1	BovineHD4100000423	2	1	REC	6/18	43/224	0.2603
1	Hapmap40716-BTA-34647	72797154	1	0.28	0.131	2	0.009539	2.58		1	Hapmap40716-BTA-34647	1	2	DOM	14/11	69/202	0.002163		1	Hapmap40716-BTA-34647	1	2	REC	0/25	2/269	1
1	BovineHD0100021081	72860587	1	0.26	0.1204	2	0.01392	2.568		1	BovineHD0100021081	1	2	DOM	13/12	64/206	0.003798		1	BovineHD0100021081	1	2	REC	0/25	1/269	1
1	Hapmap35151-BES4_Contig435_1199	72880876	2	0.38	0.4483	1	0.3756	0.7541		1	Hapmap35151-BES4_Contig435_1199	2	1	DOM	17/8	187/84	1		1	Hapmap35151-BES4_Contig435_1199	2	1	REC	2/23	56/215	0.1864
1	BTA-34645-no-rs	72960557	1	0.3	0.131	2	0.002796	2.843		1	BTA-34645-no-rs	1	2	DOM	14/11	69/202	0.002163		1	BTA-34645-no-rs	1	2	REC	1/24	2/269	0.2333
1	AX-18277826	73069219	1	0.26	0.2066	2	0.3686	1.349		1	AX-18277826	1	2	DOM	12/13	102/169	0.3906		1	AX-18277826	1	2	REC	1/24	10/261	1
1	BovineHD0100021145	73140826	2	0.46	0.4926	1	0.7678	0.8774		1	BovineHD0100021145	2	1	DOM	19/6	206/65	1		1	BovineHD0100021145	2	1	REC	4/21	61/210	0.6153
1	ARS-BFGL-NGS-93288	73178671	2	0.04	0.01476	1	0.2037	2.781		1	ARS-BFGL-NGS-93288	2	1	DOM	2/23	8/263	0.2029		1	ARS-BFGL-NGS-93288	2	1	REC	0/25	0/271	1
1	ARS-BFGL-NGS-25392	73207902	2	0.02	0.08303	1	0.1633	0.2254		1	ARS-BFGL-NGS-25392	2	1	DOM	1/24	44/227	0.1445		1	ARS-BFGL-NGS-25392	2	1	REC	0/25	1/270	1
1	Hapmap42919-BTA-35600	73274077	1	0.42	0.4723	2	0.5542	0.809		1	Hapmap42919-BTA-35600	1	2	DOM	18/7	199/72	0.8179		1	Hapmap42919-BTA-35600	1	2	REC	3/22	57/214	0.4346
1	BovineHD0100021200	73321242	2	0.4167	0.4594	1	0.6509	0.8405		1	BovineHD0100021200	2	1	DOM	17/7	194/77	1		1	BovineHD0100021200	2	1	REC	3/21	55/216	0.4347
1	ARS-BFGL-NGS-53144	73435277	2	0.32	0.1716	1	0.01332	2.272		1	ARS-BFGL-NGS-53144	2	1	DOM	15/10	86/185	0.007135		1	ARS-BFGL-NGS-53144	2	1	REC	1/24	7/264	0.5107
1	ARS-BFGL-NGS-23062	73463897	1	0.56	0.4871	2	0.3758	1.34		1	ARS-BFGL-NGS-23062	1	2	DOM	21/4	204/67	0.4636		1	ARS-BFGL-NGS-23062	1	2	REC	7/18	60/211	0.4645
1	BovineHD0100021254	73530556	1	0.2083	0.1747	2	0.5555	1.243		1	BovineHD0100021254	1	2	DOM	9/15	82/187	0.4944		1	BovineHD0100021254	1	2	REC	1/23	12/257	1
1	ARS-BFGL-NGS-32169	73586758	2	0.18	0.2177	1	0.5944	0.7888		1	ARS-BFGL-NGS-32169	2	1	DOM	9/16	102/169	1		1	ARS-BFGL-NGS-32169	2	1	REC	0/25	16/255	0.3772
1	BovineHD0100021274	73600387	2	0.625	0.4758	1	0.05111	1.836		1	BovineHD0100021274	2	1	DOM	21/3	187/82	0.09747		1	BovineHD0100021274	2	1	REC	9/15	69/200	0.2302
1	ARS-BFGL-BAC-36572	73608012	1	0.18	0.2841	2	0.1368	0.5531		1	ARS-BFGL-BAC-36572	1	2	DOM	8/17	127/144	0.2078		1	ARS-BFGL-BAC-36572	1	2	REC	1/24	27/244	0.4882
1	BovineHD0100021284	73652242	1	0.4167	0.4963	2	0.2969	0.7249		1	BovineHD0100021284	1	2	DOM	17/7	197/73	0.8134		1	BovineHD0100021284	1	2	REC	3/21	71/199	0.2173
1	BTA-35628-no-rs	73671409	1	0.14	0.1974	2	0.4526	0.6618		1	BTA-35628-no-rs	1	2	DOM	7/18	94/177	0.66		1	BTA-35628-no-rs	1	2	REC	0/25	13/258	0.6114
1	UA-IFASA-4774	73714346	2	0.44	0.3081	1	0.05893	1.764		1	UA-IFASA-4774	2	1	DOM	19/6	136/135	0.0198		1	UA-IFASA-4774	2	1	REC	3/22	31/240	1
1	ARS-BFGL-NGS-114627	73744599	1	0.3	0.3579	2	0.4438	0.7688		1	ARS-BFGL-NGS-114627	1	2	DOM	14/11	161/110	0.8324		1	ARS-BFGL-NGS-114627	1	2	REC	1/24	33/238	0.3312
1	BovineHD0100021316	73749733	1	0.6	0.4576	2	0.05582	1.778		1	BovineHD0100021316	1	2	DOM	22/3	186/85	0.06454		1	BovineHD0100021316	1	2	REC	8/17	62/209	0.327
1	BovineHD0100021318	73754036	2	0.5	0.3309	1	0.02556	2.022		1	BovineHD0100021318	2	1	DOM	20/4	146/123	0.008594		1	BovineHD0100021318	2	1	REC	4/20	32/237	0.5137
1	BovineHD0100021321	73767633	1	0.5625	0.4519	2	0.1736	1.56		1	BovineHD0100021321	1	2	DOM	21/3	184/86	0.06203		1	BovineHD0100021321	1	2	REC	6/18	60/210	0.7989
1	BTA-35631-no-rs	73789857	2	0.1	0.1218	1	0.8211	0.8013		1	BTA-35631-no-rs	2	1	DOM	5/20	62/209	1		1	BTA-35631-no-rs	2	1	REC	0/25	4/267	1
1	BovineHD0100021334	73816649	2	0.1	0.1222	1	0.8211	0.798		1	BovineHD0100021334	2	1	DOM	5/20	62/208	1		1	BovineHD0100021334	2	1	REC	0/25	4/266	1
1	BovineHD0100021364	73945134	2	0.24	0.3155	1	0.3375	0.6851		1	BovineHD0100021364	2	1	DOM	11/14	145/126	0.4067		1	BovineHD0100021364	2	1	REC	1/24	26/245	0.713
1	Hapmap38109-BTA-36588	73971461	2	0.06	0.1181	1	0.3471	0.4767		1	Hapmap38109-BTA-36588	2	1	DOM	3/22	60/211	0.3117		1	Hapmap38109-BTA-36588	2	1	REC	0/25	4/267	1
1	BovineHD0100021422	74027229	2	0.08333	0.06458	1	0.547	1.317		1	BovineHD0100021422	2	1	DOM	4/20	33/238	0.5198		1	BovineHD0100021422	2	1	REC	0/24	2/269	1
1	BovineHD0100021430	74062960	1	0.22	0.25	2	0.7335	0.8462		1	BovineHD0100021430	1	2	DOM	10/15	115/155	0.8361		1	BovineHD0100021430	1	2	REC	1/24	20/250	1
1	BovineHD0100021450	74103245	1	0.125	0.1439	2	0.8321	0.8498		1	BovineHD0100021450	1	2	DOM	6/18	70/201	1		1	BovineHD0100021450	1	2	REC	0/24	8/263	1
1	BTA-36593-no-rs	74141004	1	0.04	0.03506	2	0.6951	1.147		1	BTA-36593-no-rs	1	2	DOM	2/23	18/253	0.6807		1	BTA-36593-no-rs	1	2	REC	0/25	1/270	1
1	ARS-BFGL-NGS-81861	74559106	2	0.32	0.3111	1	0.8745	1.042		1	ARS-BFGL-NGS-81861	2	1	DOM	15/10	146/124	0.6762		1	ARS-BFGL-NGS-81861	2	1	REC	1/24	22/248	0.7051
1	BovineHD0100021626	74644792	2	0.38	0.4705	1	0.2384	0.6898		1	BovineHD0100021626	2	1	DOM	16/9	202/69	0.2454		1	BovineHD0100021626	2	1	REC	3/22	53/218	0.436
1	Hapmap51396-BTA-114937	74646138	1	0.02	0.1421	2	0.008505	0.1232		1	Hapmap51396-BTA-114937	1	2	DOM	1/24	73/198	0.007624		1	Hapmap51396-BTA-114937	1	2	REC	0/25	4/267	1
1	ARS-BFGL-NGS-37067	74688985	2	0.26	0.3875	1	0.09286	0.5555		1	ARS-BFGL-NGS-37067	2	1	DOM	13/12	165/106	0.4003		1	ARS-BFGL-NGS-37067	2	1	REC	0/25	45/226	0.01946
1	Hapmap60658-rs29025870	74716669	2	0.02	0.0203	1	1	0.9852		1	Hapmap60658-rs29025870	2	1	DOM	1/24	11/260	1		1	Hapmap60658-rs29025870	2	1	REC	0/25	0/271	1
1	BovineHD0100021666	74729378	2	0.125	0.1444	1	0.832	0.8462		1	BovineHD0100021666	2	1	DOM	6/18	72/198	1		1	BovineHD0100021666	2	1	REC	0/24	6/264	1
1	Hapmap51567-BTA-17154	74751617	1	0.04	0.02768	2	0.6472	1.464		1	Hapmap51567-BTA-17154	1	2	DOM	2/23	15/256	0.6442		1	Hapmap51567-BTA-17154	1	2	REC	0/25	0/271	1
1	BovineHD0100021709	74861369	2	0.1304	0.221	1	0.1898	0.5288		1	BovineHD0100021709	2	1	DOM	6/17	107/160	0.2651		1	BovineHD0100021709	2	1	REC	0/23	11/256	1
1	Hapmap25308-BTA-153014	74893925	1	0.34	0.2989	2	0.5246	1.208		1	Hapmap25308-BTA-153014	1	2	DOM	16/9	136/135	0.2137		1	Hapmap25308-BTA-153014	1	2	REC	1/24	26/245	0.713
1	BovineHD0100021731	74943999	1	0.32	0.3815	2	0.4472	0.763		1	BovineHD0100021731	1	2	DOM	12/13	177/93	0.08598		1	BovineHD0100021731	1	2	REC	4/21	29/241	0.5016
1	ARS-BFGL-NGS-116528	74955005	1	0.08333	0.1338	2	0.4989	0.5884		1	ARS-BFGL-NGS-116528	1	2	DOM	4/20	67/202	0.4621		1	ARS-BFGL-NGS-116528	1	2	REC	0/24	5/264	1
1	ARS-BFGL-NGS-34525	74976635	2	0.26	0.3266	1	0.4287	0.7245		1	ARS-BFGL-NGS-34525	2	1	DOM	12/13	150/121	0.5323		1	ARS-BFGL-NGS-34525	2	1	REC	1/24	27/244	0.4882
1	BovineHD0100021752	75000671	1	0.48	0.4594	2	0.8823	1.086		1	BovineHD0100021752	1	2	DOM	17/8	198/73	0.6401		1	BovineHD0100021752	1	2	REC	7/18	51/220	0.2923
1	ARS-BFGL-NGS-15456	75006721	1	0.26	0.3266	2	0.4287	0.7245		1	ARS-BFGL-NGS-15456	1	2	DOM	12/13	150/121	0.5323		1	ARS-BFGL-NGS-15456	1	2	REC	1/24	27/244	0.4882
1	BovineHD0100021760	75020131	1	0.5	0.3155	2	0.01539	2.17		1	BovineHD0100021760	1	2	DOM	19/5	146/125	0.01823		1	BovineHD0100021760	1	2	REC	5/19	25/246	0.08125
1	BovineHD0100021766	75040457	1	0.2083	0.1828	2	0.6977	1.176		1	BovineHD0100021766	1	2	DOM	10/14	87/181	0.3718		1	BovineHD0100021766	1	2	REC	0/24	11/257	0.6085
1	BovineHD0100021769	75049173	1	0.5208	0.4648	2	0.5465	1.252		1	BovineHD0100021769	1	2	DOM	20/4	197/73	0.3383		1	BovineHD0100021769	1	2	REC	5/19	54/216	1
1	BovineHD0100021799	75160480	2	0.34	0.3395	1	1	1.002		1	BovineHD0100021799	2	1	DOM	15/10	148/123	0.6776		1	BovineHD0100021799	2	1	REC	2/23	36/235	0.7534
1	Hapmap39961-BTA-100527	75184170	2	0.42	0.441	1	0.8818	0.918		1	Hapmap39961-BTA-100527	2	1	DOM	16/9	186/85	0.6565		1	Hapmap39961-BTA-100527	2	1	REC	5/20	53/218	1
1	BovineHD0100021814	75240418	1	0.2708	0.3524	2	0.2729	0.6826		1	BovineHD0100021814	1	2	DOM	11/13	156/115	0.2888		1	BovineHD0100021814	1	2	REC	2/22	35/236	0.7503
1	Hapmap59172-rs29012834	75269086	2	0.14	0.179	1	0.5653	0.7468		1	Hapmap59172-rs29012834	2	1	DOM	6/19	86/185	0.5039		1	Hapmap59172-rs29012834	2	1	REC	1/24	11/260	1
1	BovineHD0100021825	75294719	1	0.46	0.5	2	0.6583	0.8519		1	BovineHD0100021825	1	2	DOM	19/6	202/69	1		1	BovineHD0100021825	1	2	REC	4/21	69/202	0.3436
1	ARS-BFGL-NGS-72713	75346472	1	0.2	0.2546	2	0.4952	0.7319		1	ARS-BFGL-NGS-72713	1	2	DOM	9/16	121/150	0.5284		1	ARS-BFGL-NGS-72713	1	2	REC	1/24	17/254	1
1	BovineHD0100021876	75479315	1	0.4375	0.2741	2	0.02001	2.06		1	BovineHD0100021876	1	2	DOM	16/8	130/140	0.09173		1	BovineHD0100021876	1	2	REC	5/19	18/252	0.02904
1	BovineHD0100021879	75486197	2	0.5	0.3755	1	0.1208	1.663		1	BovineHD0100021879	2	1	DOM	19/5	161/108	0.07959		1	BovineHD0100021879	2	1	REC	5/19	41/228	0.5555
1	BovineHD0100021922	75570333	1	0.4375	0.4963	2	0.4552	0.7893		1	BovineHD0100021922	1	2	DOM	17/7	205/66	0.6237		1	BovineHD0100021922	1	2	REC	4/20	64/207	0.614
1	BovineHD0100021932	75602779	2	0.04167	0.03321	1	0.6734	1.266		1	BovineHD0100021932	2	1	DOM	2/22	18/253	0.6713		1	BovineHD0100021932	2	1	REC	0/24	0/271	1
1	ARS-BFGL-NGS-64672	75635752	2	0.32	0.3819	1	0.4472	0.7616		1	ARS-BFGL-NGS-64672	2	1	DOM	14/11	172/99	0.5184		1	ARS-BFGL-NGS-64672	2	1	REC	2/23	35/236	0.7517
1	Hapmap42898-BTA-28764	75682742	2	0	0.01845	1	1	0		1	Hapmap42898-BTA-28764	2	1	DOM	0/25	10/261	1		1	Hapmap42898-BTA-28764	2	1	REC	0/25	0/271	1
1	BTA-28763-no-rs	75716538	1	0.22	0.2712	2	0.5062	0.7579		1	BTA-28763-no-rs	1	2	DOM	10/15	127/144	0.5376		1	BTA-28763-no-rs	1	2	REC	1/24	20/251	1
1	BovineHD0100021976	75755758	2	0.5417	0.4389	1	0.1763	1.511		1	BovineHD0100021976	2	1	DOM	19/5	181/89	0.2608		1	BovineHD0100021976	2	1	REC	7/17	56/214	0.3113
1	ARS-BFGL-BAC-31487	75852855	1	0.26	0.2694	2	1	0.953		1	ARS-BFGL-BAC-31487	1	2	DOM	11/14	122/149	1		1	ARS-BFGL-BAC-31487	1	2	REC	2/23	24/247	1
1	BovineHD0100022054	75904016	1	0.4167	0.4907	2	0.3674	0.7412		1	BovineHD0100022054	1	2	DOM	17/7	197/73	0.8134		1	BovineHD0100022054	1	2	REC	3/21	68/202	0.2161
1	BovineHD0100022062	75933471	2	0.3333	0.2463	1	0.2243	1.53		1	BovineHD0100022062	2	1	DOM	14/10	116/154	0.1977		1	BovineHD0100022062	2	1	REC	2/22	17/253	0.6601
1	BovineHD0100022071	75978132	1	0.2708	0.1255	2	0.01369	2.589		1	BovineHD0100022071	1	2	DOM	13/11	66/205	0.003148		1	BovineHD0100022071	1	2	REC	0/24	2/269	1
1	BovineHD0100022072	75982657	1	0.5417	0.4	2	0.06616	1.773		1	BovineHD0100022072	1	2	DOM	20/4	174/96	0.07276		1	BovineHD0100022072	1	2	REC	6/18	42/228	0.2483
1	Hapmap44063-BTA-36599	76003958	1	0.26	0.1162	2	0.007132	2.671		1	Hapmap44063-BTA-36599	1	2	DOM	13/12	62/209	0.002999		1	Hapmap44063-BTA-36599	1	2	REC	0/25	1/270	1
1	BovineHD0100022079	76022080	2	0.5417	0.3996	1	0.066	1.775		1	BovineHD0100022079	2	1	DOM	20/4	173/96	0.07244		1	BovineHD0100022079	2	1	REC	6/18	42/227	0.2495
1	BTA-95639-no-rs	76090160	1	0.02	0.02583	2	1	0.7697		1	BTA-95639-no-rs	1	2	DOM	1/24	14/257	1		1	BTA-95639-no-rs	1	2	REC	0/25	0/271	1
1	BTA-95638-no-rs	76119473	2	0.02	0.02583	1	1	0.7697		1	BTA-95638-no-rs	2	1	DOM	1/24	14/257	1		1	BTA-95638-no-rs	2	1	REC	0/25	0/271	1
1	ARS-BFGL-BAC-31482	76172887	1	0.38	0.4945	2	0.1398	0.6266		1	ARS-BFGL-BAC-31482	1	2	DOM	16/9	207/64	0.2229		1	ARS-BFGL-BAC-31482	1	2	REC	3/22	61/210	0.3113
1	BovineHD0100022149	76207235	2	0.1875	0.1574	1	0.5422	1.235		1	BovineHD0100022149	2	1	DOM	8/16	79/191	0.6478		1	BovineHD0100022149	2	1	REC	1/23	6/264	0.4526
1	BTA-95655-no-rs	76217113	1	0.32	0.2601	2	0.4024	1.338		1	BTA-95655-no-rs	1	2	DOM	15/10	121/150	0.1488		1	BTA-95655-no-rs	1	2	REC	1/24	20/251	1
1	BovineHD4100000445	76232991	1	0.3333	0.4059	2	0.3594	0.7318		1	BovineHD4100000445	1	2	DOM	14/10	182/89	0.3765		1	BovineHD4100000445	1	2	REC	2/22	38/233	0.7542
1	BTA-18708-no-rs	76257377	2	0.28	0.1292	1	0.00913	2.622		1	BTA-18708-no-rs	2	1	DOM	14/11	68/203	0.001931		1	BTA-18708-no-rs	2	1	REC	0/25	2/269	1
1	Hapmap50334-BTA-36619	76318682	2	0	0.03875	1	0.2437	0		1	Hapmap50334-BTA-36619	2	1	DOM	0/25	21/250	0.2346		1	Hapmap50334-BTA-36619	2	1	REC	0/25	0/271	1
1	BovineHD0100022176	76321233	1	0.3333	0.3277	2	1	1.026		1	BovineHD0100022176	1	2	DOM	13/11	145/122	1		1	BovineHD0100022176	1	2	REC	3/21	30/237	0.7429
1	BovineHD0100022177	76324446	1	0.6042	0.4551	2	0.05071	1.828		1	BovineHD0100022177	1	2	DOM	21/3	193/74	0.1463		1	BovineHD0100022177	1	2	REC	8/16	50/217	0.1073
1	ARS-BFGL-NGS-34347	76375060	2	0.26	0.2528	1	0.8667	1.039		1	ARS-BFGL-NGS-34347	2	1	DOM	12/13	119/152	0.8338		1	ARS-BFGL-NGS-34347	2	1	REC	1/24	18/253	1
1	BovineHD0100022236	76555608	2	0.2083	0.1697	1	0.5492	1.287		1	BovineHD0100022236	2	1	DOM	10/14	84/187	0.3602		1	BovineHD0100022236	2	1	REC	0/24	8/263	1
1	BovineHD4100000446	76564040	1	0.12	0.06458	2	0.1444	1.975		1	BovineHD4100000446	1	2	DOM	5/20	35/236	0.3551		1	BovineHD4100000446	1	2	REC	1/24	0/271	0.08446
1	Hapmap44231-BTA-36623	76587512	1	0.44	0.4686	2	0.7678	0.8909		1	Hapmap44231-BTA-36623	1	2	DOM	19/6	200/71	1		1	Hapmap44231-BTA-36623	1	2	REC	3/22	54/217	0.4342
1	BovineHD0100022255	76616096	1	0.1522	0.1498	2	1	1.019		1	BovineHD0100022255	1	2	DOM	7/16	72/195	0.8074		1	BovineHD0100022255	1	2	REC	0/23	8/259	1
1	BTA-36624-no-rs	76627997	1	0.3	0.2546	2	0.5007	1.255		1	BTA-36624-no-rs	1	2	DOM	13/12	120/151	0.5306		1	BTA-36624-no-rs	1	2	REC	2/23	18/253	0.6807
1	BovineHD0100022258	76630687	1	0.1875	0.1827	2	1	1.033		1	BovineHD0100022258	1	2	DOM	8/16	87/184	1		1	BovineHD0100022258	1	2	REC	1/23	12/259	1
1	Hapmap34720-BES7_Contig462_688	76662005	2	0.18	0.1236	1	0.268	1.556		1	Hapmap34720-BES7_Contig462_688	2	1	DOM	8/17	63/208	0.3324		1	Hapmap34720-BES7_Contig462_688	2	1	REC	1/24	4/267	0.3588
1	ARS-BFGL-NGS-4661	76701704	1	0.14	0.08856	2	0.2104	1.675		1	ARS-BFGL-NGS-4661	1	2	DOM	7/18	41/230	0.1499		1	ARS-BFGL-NGS-4661	1	2	REC	0/25	7/264	1
1	BovineHD0100022298	76781403	2	0.3958	0.3993	1	1	0.9858		1	BovineHD0100022298	2	1	DOM	17/7	178/90	0.8219		1	BovineHD0100022298	2	1	REC	2/22	36/232	0.7513
1	ARS-BFGL-NGS-92711	76822042	1	0.08333	0.05741	2	0.5173	1.493		1	ARS-BFGL-NGS-92711	1	2	DOM	4/20	31/239	0.5058		1	ARS-BFGL-NGS-92711	1	2	REC	0/24	0/270	1
1	BovineHD0100022312	76841239	1	0.1739	0.1381	2	0.5075	1.314		1	BovineHD0100022312	1	2	DOM	7/16	70/198	0.6288		1	BovineHD0100022312	1	2	REC	1/22	4/264	0.3394
1	Hapmap42923-BTA-36604	76862840	1	0.28	0.2768	2	1	1.016		1	Hapmap42923-BTA-36604	1	2	DOM	13/12	128/143	0.6803		1	Hapmap42923-BTA-36604	1	2	REC	1/24	22/249	0.7052
1	ARS-BFGL-BAC-34664	76937066	1	0.34	0.4576	2	0.1368	0.6107		1	ARS-BFGL-BAC-34664	1	2	DOM	13/12	193/78	0.06672		1	ARS-BFGL-BAC-34664	1	2	REC	4/21	55/216	0.7952
1	ARS-BFGL-NGS-80187	76984280	2	0.02	0.01476	1	0.5506	1.362		1	ARS-BFGL-NGS-80187	2	1	DOM	1/24	8/263	0.5532		1	ARS-BFGL-NGS-80187	2	1	REC	0/25	0/271	1
1	BTA-36608-no-rs	77024680	1	0.4	0.4262	2	0.7665	0.8975		1	BTA-36608-no-rs	1	2	DOM	17/8	184/87	1		1	BTA-36608-no-rs	1	2	REC	3/22	47/224	0.7796
1	BovineHD0100022375	77039767	2	0.3542	0.21	1	0.0287	2.063		1	BovineHD0100022375	2	1	DOM	15/9	103/166	0.02859		1	BovineHD0100022375	2	1	REC	2/22	10/259	0.2566
1	BovineHD0100022381	77073696	1	0.2609	0.3563	2	0.2587	0.6375		1	BovineHD0100022381	1	2	DOM	10/13	158/110	0.1875		1	BovineHD0100022381	1	2	REC	2/21	33/235	1
1	BovineHD0100022391	77191739	2	0.2708	0.3081	1	0.7437	0.834		1	BovineHD0100022391	2	1	DOM	11/13	146/125	0.5243		1	BovineHD0100022391	2	1	REC	2/22	21/250	1
1	BovineHD0100022400	77211300	1	0.2708	0.3093	2	0.6279	0.8296		1	BovineHD0100022400	1	2	DOM	11/13	146/124	0.5236		1	BovineHD0100022400	1	2	REC	2/22	21/249	1
1	Hapmap41244-BTA-36610	77266687	1	0	0.07196	2	0.06562	0		1	Hapmap41244-BTA-36610	1	2	DOM	0/25	37/234	0.05422		1	Hapmap41244-BTA-36610	1	2	REC	0/25	2/269	1
1	BovineHD0100022431	77305700	1	0.2083	0.3247	2	0.1066	0.5472		1	BovineHD0100022431	1	2	DOM	10/14	146/125	0.2897		1	BovineHD0100022431	1	2	REC	0/24	30/241	0.1494
1	BovineHD0100022450	77354625	2	0.4167	0.3067	1	0.1438	1.615		1	BovineHD0100022450	2	1	DOM	16/8	140/129	0.2029		1	BovineHD0100022450	2	1	REC	4/20	25/244	0.2756
1	BovineHD0100022456	77372630	2	0.3125	0.3727	1	0.4392	0.7651		1	BovineHD0100022456	2	1	DOM	14/10	170/101	0.6664		1	BovineHD0100022456	2	1	REC	1/23	32/239	0.4945
1	BovineHD0100022459	77383623	1	0.36	0.3048	2	0.4267	1.283		1	BovineHD0100022459	1	2	DOM	16/9	133/136	0.2101		1	BovineHD0100022459	1	2	REC	2/23	31/238	1
1	Hapmap58919-rs29009958	77411154	2	0.38	0.452	1	0.3737	0.743		1	Hapmap58919-rs29009958	2	1	DOM	16/9	183/88	0.8241		1	Hapmap58919-rs29009958	2	1	REC	3/22	62/209	0.3119
1	BovineHD0100022472	77437362	1	0.5	0.4889	2	0.8838	1.045		1	BovineHD0100022472	1	2	DOM	19/6	195/76	0.8168		1	BovineHD0100022472	1	2	REC	6/19	70/201	1
1	ARS-BFGL-NGS-56146	77464630	1	0.52	0.4336	2	0.2974	1.415		1	ARS-BFGL-NGS-56146	1	2	DOM	20/5	179/92	0.1858		1	ARS-BFGL-NGS-56146	1	2	REC	6/19	56/215	0.797
1	BovineHD0100022485	77478069	2	0.12	0.0539	1	0.1069	2.393		1	BovineHD0100022485	2	1	DOM	5/20	28/241	0.1769		1	BovineHD0100022485	2	1	REC	1/24	1/268	0.1631
1	BovineHD0100022505	77511314	2	0.26	0.2934	1	0.7451	0.8463		1	BovineHD0100022505	2	1	DOM	12/13	139/132	0.8357		1	BovineHD0100022505	2	1	REC	1/24	20/251	1
1	BovineHD0100022553	77723763	1	0.48	0.4244	2	0.4588	1.252		1	BovineHD0100022553	1	2	DOM	20/5	176/95	0.1839		1	BovineHD0100022553	1	2	REC	4/21	54/217	0.7953
1	BovineHD0100022574	77819373	2	0.22	0.2593	1	0.6143	0.8059		1	BovineHD0100022574	2	1	DOM	10/15	119/151	0.8338		1	BovineHD0100022574	2	1	REC	1/24	21/249	0.706
1	Hapmap39375-BTA-112108	77861430	2	0.36	0.214	1	0.02222	2.066		1	Hapmap39375-BTA-112108	2	1	DOM	16/9	106/165	0.01935		1	Hapmap39375-BTA-112108	2	1	REC	2/23	10/261	0.2686
1	BovineHD0100022618	77981891	1	0.58	0.4907	2	0.2402	1.433		1	BovineHD0100022618	1	2	DOM	20/5	194/76	0.4861		1	BovineHD0100022618	1	2	REC	9/16	71/199	0.3468
1	BovineHD0100022630	78030606	1	0.375	0.3232	2	0.5208	1.256		1	BovineHD0100022630	1	2	DOM	17/7	138/125	0.0915		1	BovineHD0100022630	1	2	REC	1/23	32/231	0.3316
1	BovineHD0100022631	78033295	1	0.6	0.4631	2	0.07557	1.739		1	BovineHD0100022631	1	2	DOM	20/5	187/84	0.3618		1	BovineHD0100022631	1	2	REC	10/15	64/207	0.08965
1	BovineHD0100022654	78115174	2	0.18	0.1537	1	0.6828	1.209		1	BovineHD0100022654	2	1	DOM	8/17	75/195	0.6467		1	BovineHD0100022654	2	1	REC	1/24	8/262	0.5545
1	BovineHD0100022661	78135652	2	0.18	0.2472	1	0.3873	0.6684		1	BovineHD0100022661	2	1	DOM	9/16	115/154	0.6727		1	BovineHD0100022661	2	1	REC	0/25	18/251	0.3806
1	Hapmap26500-BTA-37512	78174116	2	0.06	0.06827	1	1	0.8712		1	Hapmap26500-BTA-37512	2	1	DOM	3/22	36/235	1		1	Hapmap26500-BTA-37512	2	1	REC	0/25	1/270	1
1	ARS-BFGL-BAC-31500	78202852	1	0.46	0.4244	2	0.6558	1.156		1	ARS-BFGL-BAC-31500	1	2	DOM	20/5	173/98	0.1266		1	ARS-BFGL-BAC-31500	1	2	REC	3/22	57/214	0.4346
1	BTA-37493-no-rs	78237770	2	0.08	0.06089	1	0.5417	1.341		1	BTA-37493-no-rs	2	1	DOM	3/22	30/241	0.7488		1	BTA-37493-no-rs	2	1	REC	1/24	3/268	0.2987
1	BovineHD0100022701	78279880	2	0.1	0.158	1	0.4096	0.5922		1	BovineHD0100022701	2	1	DOM	5/20	78/191	0.4861		1	BovineHD0100022701	2	1	REC	0/25	7/262	1
1	BovineHD0100022703	78290520	1	0.48	0.4185	2	0.4551	1.283		1	BovineHD0100022703	1	2	DOM	19/6	172/98	0.2764		1	BovineHD0100022703	1	2	REC	5/20	54/216	1
1	BTB-00034886	78315800	2	0.1	0.1771	1	0.2365	0.5162		1	BTB-00034886	2	1	DOM	5/20	89/182	0.2616		1	BTB-00034886	2	1	REC	0/25	7/264	1
1	BovineHD0100022711	78328342	1	0.46	0.4123	2	0.5501	1.214		1	BovineHD0100022711	1	2	DOM	18/7	169/99	0.5144		1	BovineHD0100022711	1	2	REC	5/20	52/216	1
1	ARS-BFGL-NGS-119431	78397732	1	0.44	0.4705	2	0.7675	0.8843		1	ARS-BFGL-NGS-119431	1	2	DOM	17/8	192/79	0.8193		1	ARS-BFGL-NGS-119431	1	2	REC	5/20	63/208	0.8089
1	BTB-00034743	78445777	2	0.44	0.4465	1	1	0.974		1	BTB-00034743	2	1	DOM	17/8	183/88	1		1	BTB-00034743	2	1	REC	5/20	59/212	1
1	BovineHD0100022753	78498849	1	0.06	0.1916	2	0.01962	0.2694		1	BovineHD0100022753	1	2	DOM	3/22	90/171	0.02434		1	BovineHD0100022753	1	2	REC	0/25	10/251	1
1	Hapmap40722-BTA-36642	78554220	2	0.16	0.1292	1	0.5141	1.284		1	Hapmap40722-BTA-36642	2	1	DOM	7/18	64/207	0.6276		1	Hapmap40722-BTA-36642	2	1	REC	1/24	6/265	0.4644
1	BTA-112299-no-rs	78580480	2	0.46	0.4926	1	0.7678	0.8774		1	BTA-112299-no-rs	2	1	DOM	18/7	193/78	1		1	BTA-112299-no-rs	2	1	REC	5/20	74/197	0.4896
1	BovineHD0100022788	78620073	2	0.12	0.2156	1	0.1431	0.496		1	BovineHD0100022788	2	1	DOM	5/20	101/161	0.08274		1	BovineHD0100022788	2	1	REC	1/24	12/250	1
1	ARS-BFGL-NGS-111725	78685368	1	0.4	0.2362	2	0.01591	2.156		1	ARS-BFGL-NGS-111725	1	2	DOM	17/8	116/155	0.02002		1	ARS-BFGL-NGS-111725	1	2	REC	3/22	12/259	0.1228
1	ARS-BFGL-NGS-25522	78735491	1	0.12	0.2454	2	0.05391	0.4193		1	ARS-BFGL-NGS-25522	1	2	DOM	6/19	119/152	0.05909		1	ARS-BFGL-NGS-25522	1	2	REC	0/25	14/257	0.617
1	BovineHD0100022839	78771750	1	0.12	0.1203	2	1	0.9972		1	BovineHD0100022839	1	2	DOM	6/19	59/207	0.8045		1	BovineHD0100022839	1	2	REC	0/25	5/261	1
1	BTB-00034294	78909030	1	0.34	0.262	2	0.2448	1.451		1	BTB-00034294	1	2	DOM	16/9	123/148	0.09385		1	BTB-00034294	1	2	REC	1/24	19/252	1
1	BovineHD0100022901	78991936	1	0.38	0.2928	2	0.2002	1.481		1	BovineHD0100022901	1	2	DOM	17/8	131/132	0.09583		1	BovineHD0100022901	1	2	REC	2/23	23/240	1
1	Hapmap51218-BTA-36630	79040221	1	0.38	0.4225	2	0.6537	0.8377		1	Hapmap51218-BTA-36630	1	2	DOM	16/9	184/87	0.6625		1	Hapmap51218-BTA-36630	1	2	REC	3/22	45/226	0.7776
1	BovineHD0100022920	79076444	1	0.34	0.4275	2	0.2944	0.6899		1	BovineHD0100022920	1	2	DOM	14/11	184/85	0.2642		1	BovineHD0100022920	1	2	REC	3/22	46/223	0.7786
1	BTB-00034202	79082187	2	0.26	0.1444	1	0.03965	2.081		1	BTB-00034202	2	1	DOM	13/12	74/196	0.01955		1	BTB-00034202	2	1	REC	0/25	4/266	1
1	Hapmap49586-BTA-36632	79111744	1	0.2	0.3376	2	0.05763	0.4904		1	Hapmap49586-BTA-36632	1	2	DOM	9/16	157/114	0.05614		1	Hapmap49586-BTA-36632	1	2	REC	1/24	26/245	0.713
1	ARS-BFGL-NGS-106728	79166288	1	0.26	0.3093	2	0.524	0.7848		1	ARS-BFGL-NGS-106728	1	2	DOM	11/14	144/126	0.4078		1	ARS-BFGL-NGS-106728	1	2	REC	2/23	23/247	1
1	ARS-BFGL-NGS-24966	79190806	2	0.28	0.1642	1	0.04989	1.979		1	ARS-BFGL-NGS-24966	2	1	DOM	14/11	83/188	0.0137		1	ARS-BFGL-NGS-24966	2	1	REC	0/25	6/265	1
1	BovineHD0100022969	79235157	2	0.4	0.3954	1	1	1.019		1	BovineHD0100022969	2	1	DOM	15/10	165/98	0.8304		1	BovineHD0100022969	2	1	REC	5/20	43/220	0.5824
1	BovineHD0100022979	79266686	2	0.44	0.464	1	0.7688	0.9076		1	BovineHD0100022979	2	1	DOM	17/8	185/79	0.8221		1	BovineHD0100022979	2	1	REC	5/20	60/204	1
1	ARS-BFGL-NGS-113198	79291931	2	0.16	0.1292	1	0.5141	1.284		1	ARS-BFGL-NGS-113198	2	1	DOM	8/17	64/207	0.3386		1	ARS-BFGL-NGS-113198	2	1	REC	0/25	6/265	1
1	Hapmap51438-BTA-37566	79315052	2	0.44	0.5037	1	0.4604	0.7742		1	Hapmap51438-BTA-37566	2	1	DOM	17/8	202/69	0.4796		1	Hapmap51438-BTA-37566	2	1	REC	5/20	71/200	0.635
1	BovineHD0100023005	79357690	1	0.28	0.4447	2	0.0254	0.4857		1	BovineHD0100023005	1	2	DOM	12/13	182/80	0.04216		1	BovineHD0100023005	1	2	REC	2/23	51/211	0.1882
1	BTB-00036018	79428743	1	0.32	0.3506	2	0.7571	0.8718		1	BTB-00036018	1	2	DOM	13/12	160/111	0.5292		1	BTB-00036018	1	2	REC	3/22	30/241	0.7488
1	ARS-BFGL-NGS-100951	79472403	2	0.52	0.4686	1	0.5545	1.228		1	ARS-BFGL-NGS-100951	2	1	DOM	18/7	202/69	0.8119		1	ARS-BFGL-NGS-100951	2	1	REC	8/17	52/219	0.1895
1	BovineHD0100023038	79495073	1	0.3	0.1992	2	0.1017	1.723		1	BovineHD0100023038	1	2	DOM	13/12	94/167	0.1321		1	BovineHD0100023038	1	2	REC	2/23	10/251	0.2825
1	BovineHD0100023042	79510270	2	0.12	0.1	1	0.6251	1.227		1	BovineHD0100023042	2	1	DOM	6/19	47/213	0.4297		1	BovineHD0100023042	2	1	REC	0/25	5/255	1
1	BTA-37567-no-rs	79513248	2	0.5	0.3432	1	0.03093	1.914		1	BTA-37567-no-rs	2	1	DOM	19/6	153/118	0.08834		1	BTA-37567-no-rs	2	1	REC	6/19	33/238	0.1169
1	Hapmap41250-BTA-38429	79548115	2	0.12	0.2741	1	0.01776	0.3612		1	Hapmap41250-BTA-38429	2	1	DOM	6/19	129/141	0.03409		1	Hapmap41250-BTA-38429	2	1	REC	0/25	19/251	0.3859
1	BovineHD0100023059	79572795	1	0.32	0.417	2	0.2285	0.658		1	BovineHD0100023059	1	2	DOM	13/12	176/89	0.1872		1	BovineHD0100023059	1	2	REC	3/22	45/220	0.7781
1	BovineHD0100023067	79605572	1	0.58	0.459	2	0.1056	1.628		1	BovineHD0100023067	1	2	DOM	20/5	196/72	0.6351		1	BovineHD0100023067	1	2	REC	9/16	50/218	0.06318
1	BovineHD0100023079	79639732	2	0.52	0.4316	1	0.2366	1.427		1	BovineHD0100023079	2	1	DOM	20/5	183/80	0.3611		1	BovineHD0100023079	2	1	REC	6/19	44/219	0.4051
1	BovineHD0100023116	79756204	2	0.46	0.3657	1	0.2213	1.478		1	BovineHD0100023116	2	1	DOM	18/7	166/102	0.3904		1	BovineHD0100023116	2	1	REC	5/20	30/238	0.1982
1	BTB-00036138	79757250	2	0.3	0.19	1	0.06662	1.827		1	BTB-00036138	2	1	DOM	14/11	95/176	0.05017		1	BTB-00036138	2	1	REC	1/24	8/263	0.5532
1	Hapmap50131-BTA-85559	79835571	2	0.18	0.1716	1	0.8459	1.06		1	Hapmap50131-BTA-85559	2	1	DOM	8/17	84/187	1		1	Hapmap50131-BTA-85559	2	1	REC	1/24	9/262	0.5921
1	BovineHD0100023133	79858270	1	0.24	0.25	2	1	0.9474		1	BovineHD0100023133	1	2	DOM	11/14	115/149	1		1	BovineHD0100023133	1	2	REC	1/24	17/247	1
1	BovineHD0100023142	79916138	1	0.42	0.479	2	0.461	0.7876		1	BovineHD0100023142	1	2	DOM	17/8	193/69	0.6366		1	BovineHD0100023142	1	2	REC	4/21	58/204	0.6149
1	BovineHD0100023146	79938242	2	0.6	0.3712	1	0.002191	2.541		1	BovineHD0100023146	2	1	DOM	24/1	159/105	0.0001349		1	BovineHD0100023146	2	1	REC	6/19	37/227	0.2333
1	ARS-BFGL-NGS-19741	79957893	1	0.16	0.3303	2	0.01615	0.3863		1	ARS-BFGL-NGS-19741	1	2	DOM	8/17	154/117	0.02069		1	ARS-BFGL-NGS-19741	1	2	REC	0/25	25/246	0.1466
1	BovineHD0100023165	79990596	2	0.16	0.322	1	0.01639	0.4011		1	BovineHD0100023165	2	1	DOM	7/18	146/118	0.01123		1	BovineHD0100023165	2	1	REC	1/24	24/240	0.7081
1	ARS-BFGL-NGS-1514	80021446	1	0.26	0.2399	2	0.7318	1.114		1	ARS-BFGL-NGS-1514	1	2	DOM	11/14	115/156	1		1	ARS-BFGL-NGS-1514	1	2	REC	2/23	15/256	0.6442
1	BovineHD0100023182	80037828	2	0.64	0.4639	1	0.01818	2.055		1	BovineHD0100023182	2	1	DOM	23/2	191/72	0.03247		1	BovineHD0100023182	2	1	REC	9/16	53/210	0.07626
1	BovineHD0100023186	80051299	1	0.5	0.3926	2	0.1742	1.547		1	BovineHD0100023186	1	2	DOM	18/7	175/95	0.5187		1	BovineHD0100023186	1	2	REC	7/18	37/233	0.0738
1	BovineHD0100023190	80065210	1	0.38	0.3234	2	0.4331	1.282		1	BovineHD0100023190	1	2	DOM	15/10	149/120	0.6809		1	BovineHD0100023190	1	2	REC	4/21	25/244	0.2887
1	ARS-BFGL-NGS-79990	80070890	2	0.22	0.2491	1	0.7337	0.8503		1	ARS-BFGL-NGS-79990	2	1	DOM	10/15	117/154	0.8348		1	ARS-BFGL-NGS-79990	2	1	REC	1/24	18/253	1
1	BovineHD0100023210	80108636	2	0.2	0.3657	1	0.01989	0.4337		1	BovineHD0100023210	2	1	DOM	10/15	159/109	0.0888		1	BovineHD0100023210	2	1	REC	0/25	37/231	0.05432
1	BovineHD0100023217	80140528	1	0.46	0.2752	2	0.008681	2.244		1	BovineHD0100023217	1	2	DOM	20/5	127/131	0.003214		1	BovineHD0100023217	1	2	REC	3/22	15/243	0.2044
1	BovineHD0100023223	80185391	1	0.22	0.2434	2	0.863	0.8765		1	BovineHD0100023223	1	2	DOM	10/15	114/153	0.8357		1	BovineHD0100023223	1	2	REC	1/24	16/251	1
1	BovineHD0100023235	80224613	2	0.46	0.2708	1	0.008135	2.293		1	BovineHD0100023235	2	1	DOM	20/5	128/136	0.002911		1	BovineHD0100023235	2	1	REC	3/22	15/249	0.1955
1	BTA-38441-no-rs	80284430	1	0.56	0.4188	2	0.07239	1.766		1	BTA-38441-no-rs	1	2	DOM	21/4	183/88	0.114		1	BTA-38441-no-rs	1	2	REC	7/18	44/227	0.1632
1	BTB-00035080	80454120	2	0.04	0.02974	1	0.6596	1.359		1	BTB-00035080	2	1	DOM	2/23	16/253	0.6571		1	BTB-00035080	2	1	REC	0/25	0/269	1
1	BTA-37523-no-rs	80481874	2	0.06	0.1111	1	0.3428	0.5106		1	BTA-37523-no-rs	2	1	DOM	3/22	58/212	0.3146		1	BTA-37523-no-rs	2	1	REC	0/25	2/268	1
[truncated: 71,466 more rows]
