# Supplementary material for: Genome-wide association analyses in dairy heifers highlight genes overlapping with mouse and human fertility and human health traits
Source: Research Square preprint supplement (doi:10.21203/rs.3.rs-6463477/v1), 2025-05-05
Supplement: Supplementary file 4 [file 633b19ada771951869a7aea3.xlsx]

## Sheet: gwas_data_mapped_to_genes_sig
Additional file 9. Genome wide association studies in humans with overlapping genes identified in the present study.
DATE.ADDED.TO.CATALOG	PUBMEDID	FIRST.AUTHOR	DATE	JOURNAL	LINK	STUDY	DISEASE.TRAIT	INITIAL.SAMPLE.SIZE	REPLICATION.SAMPLE.SIZE	REGION	CHR_ID	CHR_POS	REPORTED.GENE.S.	MAPPED_GENE	UPSTREAM_GENE_ID	DOWNSTREAM_GENE_ID	SNP_GENE_IDS	UPSTREAM_GENE_DISTANCE	DOWNSTREAM_GENE_DISTANCE	STRONGEST.SNP.RISK.ALLELE	SNPS	MERGED	SNP_ID_CURRENT	CONTEXT	INTERGENIC	RISK.ALLELE.FREQUENCY	P.VALUE	PVALUE_MLOG	P.VALUE..TEXT.	OR.or.BETA	X95..CI..TEXT.	PLATFORM..SNPS.PASSING.QC.	CNV	MAPPED_TRAIT	MAPPED_TRAIT_URI	STUDY.ACCESSION	GENOTYPING.TECHNOLOGY
2015-07-09	25221879	Wu K	2014-09-15	Am J Respir Crit Care Med	www.ncbi.nlm.nih.gov/pubmed/25221879	Genome-wide interrogation of longitudinal FEV1 in children with asthma.	Pulmonary function in asthmatics	510 European ancestry	NA	13q14.11	13	42212544	DGKH	DGKH			ENSG00000102780	NA	NA	rs347412-A	rs347412	0	347412	intron_variant	0	0.543	1e-06	6	(Baseline FEV1)	0.026	[NR] unit increase	Illumina [473680]	N	pulmonary function measurement, forced expiratory volume	http://www.ebi.ac.uk/efo/EFO_0003892, http://www.ebi.ac.uk/efo/EFO_0004314	GCST002608	Genome-wide genotyping array
2016-10-14	26634245	Lutz SM	2015-12-03	BMC Genet	www.ncbi.nlm.nih.gov/pubmed/26634245	A genome-wide association study identifies risk loci for spirometric measures among smokers of European and African ancestry.	Post bronchodilator FEV1/FVC ratio in COPD	5,439 European ancestry current and former smoker cases, 821 African American current and former smoker cases	NA	13q14.11	13	42244550	FAM19A2	DGKH			ENSG00000102780	NA	NA	rs114085878-C	rs114085878	1	12869882	intron_variant	0	0.86	3e-06	5.52288	(AA)	0.038	NR unit increase	Illumina [NR] (imputed)	N	FEV/FVC ratio, response to bronchodilator	http://www.ebi.ac.uk/efo/EFO_0004713, http://purl.obolibrary.org/obo/GO_0097366	GCST003265	Genome-wide genotyping array
2016-10-14	26634245	Lutz SM	2015-12-03	BMC Genet	www.ncbi.nlm.nih.gov/pubmed/26634245	A genome-wide association study identifies risk loci for spirometric measures among smokers of European and African ancestry.	Post bronchodilator FEV1/FVC ratio in COPD	5,439 European ancestry current and former smoker cases, 821 African American current and former smoker cases	NA	6p21.2	6	38371756	BTBD9	BTBD9			ENSG00000183826	NA	NA	rs150713181-G	rs150713181	0	150713181	intron_variant	0	0.984	4e-07	6.39794	(AA)	0.124	NR unit increase	Illumina [NR] (imputed)	N	FEV/FVC ratio, response to bronchodilator	http://www.ebi.ac.uk/efo/EFO_0004713, http://purl.obolibrary.org/obo/GO_0097366	GCST003265	Genome-wide genotyping array
2016-10-14	26634245	Lutz SM	2015-12-03	BMC Genet	www.ncbi.nlm.nih.gov/pubmed/26634245	A genome-wide association study identifies risk loci for spirometric measures among smokers of European and African ancestry.	Post bronchodilator FEV1/FVC ratio in COPD	5,439 European ancestry current and former smoker cases, 821 African American current and former smoker cases	NA	6p21.2	6	38383336	BTBD9	BTBD9			ENSG00000183826	NA	NA	rs114407411-A	rs114407411	0	114407411	intron_variant	0	0.984	2e-07	6.69897	(AA)	0.128	NR unit increase	Illumina [NR] (imputed)	N	FEV/FVC ratio, response to bronchodilator	http://www.ebi.ac.uk/efo/EFO_0004713, http://purl.obolibrary.org/obo/GO_0097366	GCST003265	Genome-wide genotyping array
2016-10-14	26634245	Lutz SM	2015-12-03	BMC Genet	www.ncbi.nlm.nih.gov/pubmed/26634245	A genome-wide association study identifies risk loci for spirometric measures among smokers of European and African ancestry.	Post bronchodilator FEV1/FVC ratio in COPD	5,439 European ancestry current and former smoker cases, 821 African American current and former smoker cases	NA	6p21.2	6	38387529	BTBD9	BTBD9			ENSG00000183826	NA	NA	rs192452148-T	rs192452148	0	192452148	intron_variant	0	0.984	2e-07	6.69897	(AA)	0.129	NR unit increase	Illumina [NR] (imputed)	N	FEV/FVC ratio, response to bronchodilator	http://www.ebi.ac.uk/efo/EFO_0004713, http://purl.obolibrary.org/obo/GO_0097366	GCST003265	Genome-wide genotyping array
2016-10-14	26634245	Lutz SM	2015-12-03	BMC Genet	www.ncbi.nlm.nih.gov/pubmed/26634245	A genome-wide association study identifies risk loci for spirometric measures among smokers of European and African ancestry.	Post bronchodilator FEV1/FVC ratio	10,094 European ancestry current and former smoker individuals, 3,260 African American current and former smoker individuals, 178 current and former smoker individuals	NA	10p13	10	13631528	PRPF18	PRPF18			ENSG00000165630	NA	NA	rs138071473-T	rs138071473	0	138071473	intron_variant	0	1	5e-06	5.30103	(AA)	0.698	unit increase	Illumina [NR] (imputed)	N	FEV/FVC ratio, response to bronchodilator	http://www.ebi.ac.uk/efo/EFO_0004713, http://purl.obolibrary.org/obo/GO_0097366	GCST003264	Genome-wide genotyping array
2016-10-14	26634245	Lutz SM	2015-12-03	BMC Genet	www.ncbi.nlm.nih.gov/pubmed/26634245	A genome-wide association study identifies risk loci for spirometric measures among smokers of European and African ancestry.	Post bronchodilator FEV1/FVC ratio	10,094 European ancestry current and former smoker individuals, 3,260 African American current and former smoker individuals, 178 current and former smoker individuals	NA	6p21.2	6	38283599	BTBD9	BTBD9			ENSG00000183826	NA	NA	rs77928651-A	rs77928651	0	77928651	intron_variant	0	0.999	1e-06	6	(AA)	0.254	unit increase	Illumina [NR] (imputed)	N	FEV/FVC ratio, response to bronchodilator	http://www.ebi.ac.uk/efo/EFO_0004713, http://purl.obolibrary.org/obo/GO_0097366	GCST003264	Genome-wide genotyping array
2011-10-18	21946350	Soler Artigas M	2011-09-25	Nat Genet	www.ncbi.nlm.nih.gov/pubmed/21946350	Genome-wide association and large-scale follow up identifies 16 new loci influencing lung function.	Pulmonary function	48,201 European ancestry individuals	46,411 European ancestry individuals	10q22.3	10	76555466	C10orf11	LRMDA			ENSG00000148655	NA	NA	rs11001819-G	rs11001819	0	11001819	intron_variant	0	0.52	3e-12	11.5229	(FEV1)	0.029	[0.021-0.037] unit decrease	Affymetrix, Illumina [~ 2500000] (imputed)	N	pulmonary function measurement, forced expiratory volume	http://www.ebi.ac.uk/efo/EFO_0003892, http://www.ebi.ac.uk/efo/EFO_0004314	GCST001251	Genome-wide genotyping array
2013-02-27	23284291	Hancock DB	2012-12-20	PLoS Genet	www.ncbi.nlm.nih.gov/pubmed/23284291	Genome-wide joint meta-analysis of SNP and SNP-by-smoking interaction identifies novel loci for pulmonary function.	Pulmonary function (smoking interaction)	50,047 European ancestry individuals	NA	10q22.3	10	76555466	C10orf11	LRMDA			ENSG00000148655	NA	NA	rs11001819-?	rs11001819	0	11001819	intron_variant	0	NR	5e-08	7.30103	(FEV1, Ever-smoking)	NA		NR [~ 2500000] (imputed)	N	pulmonary function measurement, forced expiratory volume, smoking behaviour measurement	http://www.ebi.ac.uk/efo/EFO_0003892, http://www.ebi.ac.uk/efo/EFO_0004314, http://www.ebi.ac.uk/efo/EFO_0005671	GCST001784	Genome-wide genotyping array
2012-04-27	22424883	Imboden M	2012-03-15	J Allergy Clin Immunol	www.ncbi.nlm.nih.gov/pubmed/22424883	Genome-wide association study of lung function decline in adults with and without asthma.	Pulmonary function decline	1,441 European ancestry asthma cases, 2,677 European ancestry controls	1,160 European ancestry asthma cases, 10,858 European ancestry controls	11q21	11	93433565	FLJ25393	DEUP1			ENSG00000165325	NA	NA	rs2658782-?	rs2658782	0	2658782	intron_variant	0	NR	4e-06	5.39794	(FEV1/FVC decline in non-asthmatics)	0.1858	[0.11-0.27] unit increase	Illumina [~ 2500000] (imputed)	N	FEV/FVC ratio	http://www.ebi.ac.uk/efo/EFO_0004713	GCST001444	Genome-wide genotyping array
2017-03-30	27611488	Almoguera B	2016-09-09	Am J Respir Crit Care Med	www.ncbi.nlm.nih.gov/pubmed/27611488	Identification of Four Novel Loci in Asthma in European American and African American Populations.	Asthma (childhood onset)	1,181 African American allergic asthma child cases, 498 African American non-allergic asthma child cases, 2,993 African American child controls, 998 European American allergic asthma child cases, 182 European American non-allergic asthma child cases, 4,097 European American child controls.	NA	10q23.2	10	86305355	GRID1	GRID1			ENSG00000182771	NA	NA	rs2353275-?	rs2353275	0	2353275	intron_variant	0	NR	2e-07	6.69897		0.194	[0.12-0.27] unit increase	Affymetrix, Illumina [NR] (imputed)	N	asthma	http://purl.obolibrary.org/obo/MONDO_0004979	GCST003832	Genome-wide genotyping array
2017-03-30	27611488	Almoguera B	2016-09-09	Am J Respir Crit Care Med	www.ncbi.nlm.nih.gov/pubmed/27611488	Identification of Four Novel Loci in Asthma in European American and African American Populations.	Asthma (childhood onset)	1,181 African American allergic asthma child cases, 498 African American non-allergic asthma child cases, 2,993 African American child controls, 998 European American allergic asthma child cases, 182 European American non-allergic asthma child cases, 4,097 European American child controls.	NA	10q23.2	10	86305355	GRID1	GRID1			ENSG00000182771	NA	NA	rs2353275-?	rs2353275	0	2353275	intron_variant	0	NR	8e-06	5.09691	(AA)	NA		Affymetrix, Illumina [NR] (imputed)	N	asthma	http://purl.obolibrary.org/obo/MONDO_0004979	GCST003832	Genome-wide genotyping array
2017-03-30	27611488	Almoguera B	2016-09-09	Am J Respir Crit Care Med	www.ncbi.nlm.nih.gov/pubmed/27611488	Identification of Four Novel Loci in Asthma in European American and African American Populations.	Asthma	819 African American non-allergic asthma cases, 2,218 African American allergic asthma cases 4,360 African American controls, 808 European American non-allergic asthma cases, 1,464 European American allergic asthma cases, 11,975 European American controls	NA	10q23.2	10	86305355	GRID1	GRID1			ENSG00000182771	NA	NA	rs2353275-?	rs2353275	0	2353275	intron_variant	0	NR	5e-06	5.30103		0.14	[0.079-0.201] unit increase	Affymetrix, Illumina [NR] (imputed)	N	asthma	http://purl.obolibrary.org/obo/MONDO_0004979	GCST003831	Genome-wide genotyping array
2019-03-18	27089180	Day FR	2016-04-18	Nat Genet	www.ncbi.nlm.nih.gov/pubmed/27089180	Physical and neurobehavioral determinants of reproductive onset and success.	Age at first sexual intercourse	59,357 British ancestry males, 66,310 British ancestry females	NA	3p12.1	3	85460734	CADM2	CADM2			ENSG00000175161	NA	NA	rs57401290-GGTGTGT	rs57401290	0	57401290	intron_variant	0	0.552065	8e-14	13.0969		0.0304779	[0.022-0.038] unit increase	Affymetrix [641018] (imputed)	N	age at first sexual intercourse measurement	http://www.ebi.ac.uk/efo/EFO_0009749	GCST007335	Genome-wide genotyping array
2019-03-18	27089180	Day FR	2016-04-18	Nat Genet	www.ncbi.nlm.nih.gov/pubmed/27089180	Physical and neurobehavioral determinants of reproductive onset and success.	Age at first sexual intercourse	59,357 British ancestry males, 66,310 British ancestry females	NA	11q14.1	11	85561150	DLG2	DLG2			ENSG00000150672	NA	NA	rs201909661-A	rs201909661	0	201909661	intron_variant	0	0.018129	4e-06	5.39794	(men)	0.0672787	[0.039-0.096] unit increase	Affymetrix [641018] (imputed)	N	age at first sexual intercourse measurement	http://www.ebi.ac.uk/efo/EFO_0009749	GCST007335	Genome-wide genotyping array
2019-03-27	30804560	Shrine N	2019-02-25	Nat Genet	www.ncbi.nlm.nih.gov/pubmed/30804560	New genetic signals for lung function highlight pathways and chronic obstructive pulmonary disease associations across multiple ancestries.	Lung function (FEV1/FVC)	321,047 European ancestry individuals	79,005 European ancestry individuals	17q23.2	17	61209283	BCAS3	BCAS3			ENSG00000141376	NA	NA	rs8068952-C	rs8068952	0	8068952	intron_variant	0	0.7839	1e-22	22		0.0285	[0.023-0.034] unit decrease	Affymetrix [19819130] (imputed)	N	FEV/FVC ratio	http://www.ebi.ac.uk/efo/EFO_0004713	GCST007431	Genome-wide genotyping array
2019-03-27	30804560	Shrine N	2019-02-25	Nat Genet	www.ncbi.nlm.nih.gov/pubmed/30804560	New genetic signals for lung function highlight pathways and chronic obstructive pulmonary disease associations across multiple ancestries.	Lung function (FVC)	321,047 European ancestry individuals	79,005 European ancestry individuals	10q22.3	10	76552244	C10orf11	LRMDA			ENSG00000148655	NA	NA	rs2637254-A	rs2637254	0	2637254	intron_variant	0	0.5108	2e-21	20.699		0.0224	[0.018-0.027] unit decrease	Affymetrix [19819130] (imputed)	N	vital capacity	http://www.ebi.ac.uk/efo/EFO_0004312	GCST007429	Genome-wide genotyping array
2019-03-27	30804560	Shrine N	2019-02-25	Nat Genet	www.ncbi.nlm.nih.gov/pubmed/30804560	New genetic signals for lung function highlight pathways and chronic obstructive pulmonary disease associations across multiple ancestries.	Lung function (FEV1/FVC)	321,047 European ancestry individuals	79,005 European ancestry individuals	10q22.3	10	76552244	C10orf11	LRMDA			ENSG00000148655	NA	NA	rs2637254-A	rs2637254	0	2637254	intron_variant	0	0.5108	3e-15	14.5229		0.0188	[0.014-0.024] unit decrease	Affymetrix [19819130] (imputed)	N	FEV/FVC ratio	http://www.ebi.ac.uk/efo/EFO_0004713	GCST007431	Genome-wide genotyping array
2020-06-04	32296059	Han Y	2020-04-15	Nat Commun	www.ncbi.nlm.nih.gov/pubmed/32296059	Genome-wide analysis highlights contribution of immune system pathways to the genetic architecture of asthma.	Asthma	84,492 European ancestry cases, 2,149 African American cases, 606 Hispanic cases, 1,239 Japanese ancestry cases, 437,036 European ancestry controls, 6,055 African American controls, 792 Hispanic controls, 3,976 Japanese ancestry controls	NR	20q13.12	20	47053149	EYA2	EYA2			ENSG00000064655	NA	NA	rs8125525-C	rs8125525	0	8125525	intron_variant	0	0.74	2e-08	7.69897		NA		NR [> 9500000] (imputed)	N	asthma	http://purl.obolibrary.org/obo/MONDO_0004979	GCST010043	Genome-wide genotyping array
2019-02-08	30595370	Kichaev G	2018-12-27	Am J Hum Genet	www.ncbi.nlm.nih.gov/pubmed/30595370	Leveraging Polygenic Functional Enrichment to Improve GWAS Power.	Lung function (FEV1/FVC)	approximately 370,000 European ancestry individuals	NA	2p22.1	2	40320284		SLC8A1			ENSG00000183023	NA	NA	rs2287051-?	rs2287051	0	2287051	intron_variant	0	NR	2e-09	8.69897		NA		NR [~ 8900000] (imputed)	N	FEV/FVC ratio	http://www.ebi.ac.uk/efo/EFO_0004713	GCST007080	Genome-wide genotyping array
2019-02-08	30595370	Kichaev G	2018-12-27	Am J Hum Genet	www.ncbi.nlm.nih.gov/pubmed/30595370	Leveraging Polygenic Functional Enrichment to Improve GWAS Power.	Lung function (FEV1/FVC)	approximately 370,000 European ancestry individuals	NA	3p14.3	3	55551125		ERC2			ENSG00000187672	NA	NA	rs62251475-?	rs62251475	0	62251475	intron_variant	0	NR	1e-10	10		NA		NR [~ 8900000] (imputed)	N	FEV/FVC ratio	http://www.ebi.ac.uk/efo/EFO_0004713	GCST007080	Genome-wide genotyping array
2019-02-08	30595370	Kichaev G	2018-12-27	Am J Hum Genet	www.ncbi.nlm.nih.gov/pubmed/30595370	Leveraging Polygenic Functional Enrichment to Improve GWAS Power.	Lung function (FEV1/FVC)	approximately 370,000 European ancestry individuals	NA	3p14.3	3	55746138		ERC2			ENSG00000187672	NA	NA	rs6801405-?	rs6801405	0	6801405	intron_variant	0	NR	6e-12	11.2218		NA		NR [~ 8900000] (imputed)	N	FEV/FVC ratio	http://www.ebi.ac.uk/efo/EFO_0004713	GCST007080	Genome-wide genotyping array
2019-02-08	30595370	Kichaev G	2018-12-27	Am J Hum Genet	www.ncbi.nlm.nih.gov/pubmed/30595370	Leveraging Polygenic Functional Enrichment to Improve GWAS Power.	Lung function (FEV1/FVC)	approximately 370,000 European ancestry individuals	NA	3p14.3	3	56248950		ERC2			ENSG00000187672	NA	NA	rs17216573-?	rs17216573	0	17216573	intron_variant	0	NR	3e-19	18.5229		NA		NR [~ 8900000] (imputed)	N	FEV/FVC ratio	http://www.ebi.ac.uk/efo/EFO_0004713	GCST007080	Genome-wide genotyping array
2019-02-08	30595370	Kichaev G	2018-12-27	Am J Hum Genet	www.ncbi.nlm.nih.gov/pubmed/30595370	Leveraging Polygenic Functional Enrichment to Improve GWAS Power.	Lung function (FEV1/FVC)	approximately 370,000 European ancestry individuals	NA	5q35.1	5	172879537		ERGIC1			ENSG00000113719	NA	NA	rs9637855-?	rs9637855	0	9637855	intron_variant	0	NR	7e-08	7.1549		NA		NR [~ 8900000] (imputed)	N	FEV/FVC ratio	http://www.ebi.ac.uk/efo/EFO_0004713	GCST007080	Genome-wide genotyping array
2018-11-01	30061609	Wyss AB	2018-07-30	Nat Commun	www.ncbi.nlm.nih.gov/pubmed/30061609	Multiethnic meta-analysis identifies ancestry-specific and cross-ancestry loci for pulmonary function.	Lung function (FVC)	60,552 European ancestry individuals, 8,429 African individuals, 9,959 Korean ancestry individuals, 11,775 Hispanic individuals		20q13.12	20	46900932	EYA2	EYA2			ENSG00000064655	NA	NA	rs2236519-A	rs2236519	0	2236519	intron_variant	0	0.38	4e-08	7.39794	(EA)	18.06	[11.63-24.49] ml decrease	Affymetrix, Illumina [10900000] (imputed)	N	vital capacity	http://www.ebi.ac.uk/efo/EFO_0004312	GCST006483	Genome-wide genotyping array
2019-09-13	26423011	Wain LV	2015-09-27	Lancet Respir Med	www.ncbi.nlm.nih.gov/pubmed/26423011	Novel insights into the genetics of smoking behaviour, lung function, and chronic obstructive pulmonary disease (UK BiLEVE): a genetic association study in UK Biobank.	Lung function (low FEV1 vs high FEV1)	19,493 European ancestry individuals with low FEV1 measurements, 9,808 European ancestry individuals with high FEV1 measurements	NA	10q22.3	10	76555466	C10orf11	LRMDA			ENSG00000148655	NA	NA	rs11001819-A	rs11001819	0	11001819	intron_variant	0	NR	1e-08	8		0.11	[0.073-0.147] unit decrease	Affymetrix [28509962] (imputed)	N	forced expiratory volume	http://www.ebi.ac.uk/efo/EFO_0004314	GCST008664	Genome-wide genotyping array
2019-09-13	26423011	Wain LV	2015-09-27	Lancet Respir Med	www.ncbi.nlm.nih.gov/pubmed/26423011	Novel insights into the genetics of smoking behaviour, lung function, and chronic obstructive pulmonary disease (UK BiLEVE): a genetic association study in UK Biobank.	Lung function in never smokers (low FEV1 vs high FEV1)	9,745 European ancestry individuals with low FEV1 measurements, 4,902 European ancestry individuals with high FEV1 measurements	NA	10q22.3	10	76555466	C10orf11	LRMDA			ENSG00000148655	NA	NA	rs11001819-G	rs11001819	0	11001819	intron_variant	0	0.506	6e-06	5.22185		1.12	[1.07-1.18]	Affymetrix [28509962] (imputed)	N	forced expiratory volume	http://www.ebi.ac.uk/efo/EFO_0004314	GCST008662	Genome-wide genotyping array
2017-06-16	28166213	Wain LV	2017-02-06	Nat Genet	www.ncbi.nlm.nih.gov/pubmed/28166213	Genome-wide association analyses for lung function and chronic obstructive pulmonary disease identify new loci and potential druggable targets.	Lung function (FEV1)	48,943 European ancestry individuals.	57,176 European ancestry individuals, 38,199 individuals.	10q22.3	10	76552244	C10orf11	LRMDA			ENSG00000148655	NA	NA	rs2637254-A	rs2637254	0	2637254	intron_variant	0	0.51	5e-08	7.30103		0.036	[0.022-0.05] unit decrease	Affymetrix [up to 27624732] (imputed)	N	forced expiratory volume	http://www.ebi.ac.uk/efo/EFO_0004314	GCST004183	Genome-wide genotyping array
2017-06-16	28166213	Wain LV	2017-02-06	Nat Genet	www.ncbi.nlm.nih.gov/pubmed/28166213	Genome-wide association analyses for lung function and chronic obstructive pulmonary disease identify new loci and potential druggable targets.	Lung function (FVC)	48,943 European ancestry individuals.	57,176 European ancestry individuals, 38,199 individuals.	10q22.3	10	76552244	C10orf11	LRMDA			ENSG00000148655	NA	NA	rs2637254-A	rs2637254	0	2637254	intron_variant	0	0.5126	4e-07	6.39794		0.034	[0.02-0.048] unit decrease	Affymetrix [27624732] (imputed)	N	vital capacity	http://www.ebi.ac.uk/efo/EFO_0004312	GCST004184	Genome-wide genotyping array
2018-01-12	29095316	Suh Y	2017-11-01	Medicine (Baltimore)	www.ncbi.nlm.nih.gov/pubmed/29095316	Genome-wide association study for genetic variants related with maximal voluntary ventilation reveals two novel genomic signals associated with lung function.	Lung function (maximal voluntary ventilation)	8,842 Korean ancestry individuals	NA	3p14.2	3	60582520	FHIT	FHIT			ENSG00000189283	NA	NA	rs9833533-?	rs9833533	0	9833533	intron_variant	0	NR	3e-08	7.52288		6.68	unit increase	Affymetrix [2476376] (imputed)	N	maximal voluntary ventilation, pulmonary function measurement	http://www.ebi.ac.uk/efo/EFO_0008431, http://www.ebi.ac.uk/efo/EFO_0003892	GCST005127	Genome-wide genotyping array
2016-10-14	26634245	Lutz SM	2015-12-03	BMC Genet	www.ncbi.nlm.nih.gov/pubmed/26634245	A genome-wide association study identifies risk loci for spirometric measures among smokers of European and African ancestry.	Post bronchodilator FEV1/FVC ratio	10,094 European ancestry current and former smoker individuals, 3,260 African American current and former smoker individuals, 178 current and former smoker individuals	NA	3p12.1	3	85068884	CADM2	CADM2			ENSG00000175161	NA	NA	rs17791975-A	rs17791975	0	17791975	intron_variant	0	0.981	9e-07	6.04576		0.045	unit decrease	Illumina [NR] (imputed)	N	FEV/FVC ratio, response to bronchodilator	http://www.ebi.ac.uk/efo/EFO_0004713, http://purl.obolibrary.org/obo/GO_0097366	GCST003264	Genome-wide genotyping array
2016-10-14	26634245	Lutz SM	2015-12-03	BMC Genet	www.ncbi.nlm.nih.gov/pubmed/26634245	A genome-wide association study identifies risk loci for spirometric measures among smokers of European and African ancestry.	Post bronchodilator FEV1/FVC ratio	10,094 European ancestry current and former smoker individuals, 3,260 African American current and former smoker individuals, 178 current and former smoker individuals	NA	3p12.1	3	85061820	CADM2	CADM2			ENSG00000175161	NA	NA	rs73125111-C	rs73125111	0	73125111	intron_variant	0	0.981	9e-07	6.04576		0.045	unit decrease	Illumina [NR] (imputed)	N	FEV/FVC ratio, response to bronchodilator	http://www.ebi.ac.uk/efo/EFO_0004713, http://purl.obolibrary.org/obo/GO_0097366	GCST003264	Genome-wide genotyping array
2016-10-14	26634245	Lutz SM	2015-12-03	BMC Genet	www.ncbi.nlm.nih.gov/pubmed/26634245	A genome-wide association study identifies risk loci for spirometric measures among smokers of European and African ancestry.	Post bronchodilator FEV1/FVC ratio	10,094 European ancestry current and former smoker individuals, 3,260 African American current and former smoker individuals, 178 current and former smoker individuals	NA	3p12.1	3	85319669	CADM2	CADM2			ENSG00000175161	NA	NA	rs116155186-T	rs116155186	0	116155186	intron_variant	0	0.981	3e-06	5.52288		0.045	unit decrease	Illumina [NR] (imputed)	N	FEV/FVC ratio, response to bronchodilator	http://www.ebi.ac.uk/efo/EFO_0004713, http://purl.obolibrary.org/obo/GO_0097366	GCST003264	Genome-wide genotyping array
2016-10-14	26634245	Lutz SM	2015-12-03	BMC Genet	www.ncbi.nlm.nih.gov/pubmed/26634245	A genome-wide association study identifies risk loci for spirometric measures among smokers of European and African ancestry.	Post bronchodilator FEV1/FVC ratio	10,094 European ancestry current and former smoker individuals, 3,260 African American current and former smoker individuals, 178 current and former smoker individuals	NA	3p12.1	3	84964010	CADM2	CADM2			ENSG00000175161	NA	NA	rs17733561-A	rs17733561	0	17733561	intron_variant	0	0.981	2e-06	5.69897		0.043	unit decrease	Illumina [NR] (imputed)	N	FEV/FVC ratio, response to bronchodilator	http://www.ebi.ac.uk/efo/EFO_0004713, http://purl.obolibrary.org/obo/GO_0097366	GCST003264	Genome-wide genotyping array
2016-10-14	26634245	Lutz SM	2015-12-03	BMC Genet	www.ncbi.nlm.nih.gov/pubmed/26634245	A genome-wide association study identifies risk loci for spirometric measures among smokers of European and African ancestry.	Post bronchodilator FEV1/FVC ratio	10,094 European ancestry current and former smoker individuals, 3,260 African American current and former smoker individuals, 178 current and former smoker individuals	NA	3p12.1	3	85238146	CADM2	CADM2			ENSG00000175161	NA	NA	rs73130739-T	rs73130739	0	73130739	intron_variant	0	0.98	3e-06	5.52288		0.043	unit decrease	Illumina [NR] (imputed)	N	FEV/FVC ratio, response to bronchodilator	http://www.ebi.ac.uk/efo/EFO_0004713, http://purl.obolibrary.org/obo/GO_0097366	GCST003264	Genome-wide genotyping array
2016-10-14	26634245	Lutz SM	2015-12-03	BMC Genet	www.ncbi.nlm.nih.gov/pubmed/26634245	A genome-wide association study identifies risk loci for spirometric measures among smokers of European and African ancestry.	Post bronchodilator FEV1/FVC ratio	10,094 European ancestry current and former smoker individuals, 3,260 African American current and former smoker individuals, 178 current and former smoker individuals	NA	6p21.2	6	38286043	BTBD9	BTBD9			ENSG00000183826	NA	NA	rs139632137-A	rs139632137	0	139632137	intron_variant	0	0.999	2e-06	5.69897	(AA)	0.283	unit increase	Illumina [NR] (imputed)	N	FEV/FVC ratio, response to bronchodilator	http://www.ebi.ac.uk/efo/EFO_0004713, http://purl.obolibrary.org/obo/GO_0097366	GCST003264	Genome-wide genotyping array
2016-10-14	26634245	Lutz SM	2015-12-03	BMC Genet	www.ncbi.nlm.nih.gov/pubmed/26634245	A genome-wide association study identifies risk loci for spirometric measures among smokers of European and African ancestry.	Post bronchodilator FEV1/FVC ratio	10,094 European ancestry current and former smoker individuals, 3,260 African American current and former smoker individuals, 178 current and former smoker individuals	NA	4p15.2	4	21881462	KCNIP4	KCNIP4			ENSG00000185774	NA	NA	rs181995593-C	rs181995593	0	181995593	intron_variant	0	0.998	4e-06	5.39794	(AA)	0.224	unit increase	Illumina [NR] (imputed)	N	FEV/FVC ratio, response to bronchodilator	http://www.ebi.ac.uk/efo/EFO_0004713, http://purl.obolibrary.org/obo/GO_0097366	GCST003264	Genome-wide genotyping array
2016-10-14	26634245	Lutz SM	2015-12-03	BMC Genet	www.ncbi.nlm.nih.gov/pubmed/26634245	A genome-wide association study identifies risk loci for spirometric measures among smokers of European and African ancestry.	Post bronchodilator FEV1/FVC ratio	10,094 European ancestry current and former smoker individuals, 3,260 African American current and former smoker individuals, 178 current and former smoker individuals	NA	3p12.1	3	85170483	CADM2	CADM2			ENSG00000175161	NA	NA	rs141697181-T	rs141697181	0	141697181	intron_variant	0	0.02	3e-06	5.52288		0.042	unit increase	Illumina [NR] (imputed)	N	FEV/FVC ratio, response to bronchodilator	http://www.ebi.ac.uk/efo/EFO_0004713, http://purl.obolibrary.org/obo/GO_0097366	GCST003264	Genome-wide genotyping array
2016-10-14	26634245	Lutz SM	2015-12-03	BMC Genet	www.ncbi.nlm.nih.gov/pubmed/26634245	A genome-wide association study identifies risk loci for spirometric measures among smokers of European and African ancestry.	Post bronchodilator FEV1/FVC ratio	10,094 European ancestry current and former smoker individuals, 3,260 African American current and former smoker individuals, 178 current and former smoker individuals	NA	11q14.1	11	84107286	DLG2	DLG2			ENSG00000150672	NA	NA	rs150829342-G	rs150829342	0	150829342	intron_variant	0	0.998	5e-08	7.30103	(AA)	0.2	unit increase	Illumina [NR] (imputed)	N	FEV/FVC ratio, response to bronchodilator	http://www.ebi.ac.uk/efo/EFO_0004713, http://purl.obolibrary.org/obo/GO_0097366	GCST003264	Genome-wide genotyping array
2016-10-14	26634245	Lutz SM	2015-12-03	BMC Genet	www.ncbi.nlm.nih.gov/pubmed/26634245	A genome-wide association study identifies risk loci for spirometric measures among smokers of European and African ancestry.	Post bronchodilator FEV1/FVC ratio	10,094 European ancestry current and former smoker individuals, 3,260 African American current and former smoker individuals, 178 current and former smoker individuals	NA	11q14.1	11	84206103	DLG2	DLG2			ENSG00000150672	NA	NA	rs189780858-T	rs189780858	0	189780858	intron_variant	0	0.998	6e-08	7.22185	(AA)	0.192	unit increase	Illumina [NR] (imputed)	N	FEV/FVC ratio, response to bronchodilator	http://www.ebi.ac.uk/efo/EFO_0004713, http://purl.obolibrary.org/obo/GO_0097366	GCST003264	Genome-wide genotyping array
2016-10-14	26634245	Lutz SM	2015-12-03	BMC Genet	www.ncbi.nlm.nih.gov/pubmed/26634245	A genome-wide association study identifies risk loci for spirometric measures among smokers of European and African ancestry.	Post bronchodilator FEV1/FVC ratio	10,094 European ancestry current and former smoker individuals, 3,260 African American current and former smoker individuals, 178 current and former smoker individuals	NA	11q14.1	11	84337159	DLG2	DLG2			ENSG00000150672	NA	NA	rs192772225-A	rs192772225	0	192772225	intron_variant	0	1	9e-08	7.04576	(AA)	0.47	unit increase	Illumina [NR] (imputed)	N	FEV/FVC ratio, response to bronchodilator	http://www.ebi.ac.uk/efo/EFO_0004713, http://purl.obolibrary.org/obo/GO_0097366	GCST003264	Genome-wide genotyping array
2016-10-14	26634245	Lutz SM	2015-12-03	BMC Genet	www.ncbi.nlm.nih.gov/pubmed/26634245	A genome-wide association study identifies risk loci for spirometric measures among smokers of European and African ancestry.	Post bronchodilator FEV1/FVC ratio	10,094 European ancestry current and former smoker individuals, 3,260 African American current and former smoker individuals, 178 current and former smoker individuals	NA	3p14.3	3	55748913	ERC2	ERC2			ENSG00000187672	NA	NA	rs73075135-T	rs73075135	0	73075135	intron_variant	0	1	3e-07	6.52288	(AA)	0.671	unit increase	Illumina [NR] (imputed)	N	FEV/FVC ratio, response to bronchodilator	http://www.ebi.ac.uk/efo/EFO_0004713, http://purl.obolibrary.org/obo/GO_0097366	GCST003264	Genome-wide genotyping array
2016-10-14	26634245	Lutz SM	2015-12-03	BMC Genet	www.ncbi.nlm.nih.gov/pubmed/26634245	A genome-wide association study identifies risk loci for spirometric measures among smokers of European and African ancestry.	Post bronchodilator FEV1/FVC ratio	10,094 European ancestry current and former smoker individuals, 3,260 African American current and former smoker individuals, 178 current and former smoker individuals	NA	3p26.2	3	2831489	CNTN4	CNTN4			ENSG00000144619	NA	NA	rs150343078-T	rs150343078	0	150343078	intron_variant	0	0.999	3e-07	6.52288	(AA)	0.44	unit increase	Illumina [NR] (imputed)	N	FEV/FVC ratio, response to bronchodilator	http://www.ebi.ac.uk/efo/EFO_0004713, http://purl.obolibrary.org/obo/GO_0097366	GCST003264	Genome-wide genotyping array
2017-12-01	28928442	Tian C	2017-09-19	Nat Commun	www.ncbi.nlm.nih.gov/pubmed/28928442	Genome-wide association and HLA region fine-mapping studies identify susceptibility loci for multiple common infections.	Pneumonia	40,600 European ancestry cases, 90,039 European ancestry controls	NA	10p12.31	10	19726478	NR	MALRD1			ENSG00000204740	NA	NA	rs143752272-?	rs143752272	0	143752272	non_coding_transcript_exon_variant	0	NR	8e-06	5.09691		0.243	[0.14-0.35] unit increase	Illumina [at least 560000] (imputed)	N	susceptibility to pneumonia measurement	http://www.ebi.ac.uk/efo/EFO_0008410	GCST005009	Genome-wide genotyping array
2024-10-17	38102678	Jiang M	2023-12-15	Respir Res	www.ncbi.nlm.nih.gov/pubmed/38102678	Genetic and observational associations of lung function with gastrointestinal tract diseases: pleiotropic and mendelian randomization analysis.	FEV1/FVC or peptic ulcer disease (pleiotropy)	400,102 European ancestry individuals with FEV1/FVC measurement, 24,906 European ancestry PUD cases, 731,917 European ancestry PUD controls	NA	5q35.2	5	173907216		CPEB4			ENSG00000113742	NA	NA	rs75049939-?	rs75049939	0	75049939	intron_variant	0	NR	7e-09	8.1549		NA		NR [NR]	N	FEV/FVC ratio, peptic ulcer disease	http://www.ebi.ac.uk/efo/EFO_0004713, http://purl.obolibrary.org/obo/MONDO_0004247	GCST90454179	Genome-wide genotyping array
2024-10-17	38102678	Jiang M	2023-12-15	Respir Res	www.ncbi.nlm.nih.gov/pubmed/38102678	Genetic and observational associations of lung function with gastrointestinal tract diseases: pleiotropic and mendelian randomization analysis.	FEV1/FVC or irritable bowel syndrome (pleiotropy)	400,102 European ancestry individuals with FEV1/FVC measurement, 61,516 European ancestry IBS cases, 709,884 European ancestry controls	NA	22q12.2	22	29792256		ASCC2			ENSG00000100325	NA	NA	rs5752962-?	rs5752962	0	5752962	intron_variant	0	NR	2e-08	7.69897		NA		NR [NR]	N	FEV/FVC ratio, irritable bowel syndrome	http://www.ebi.ac.uk/efo/EFO_0004713, http://www.ebi.ac.uk/efo/EFO_0000555	GCST90454182	Genome-wide genotyping array
2019-02-08	30595370	Kichaev G	2018-12-27	Am J Hum Genet	www.ncbi.nlm.nih.gov/pubmed/30595370	Leveraging Polygenic Functional Enrichment to Improve GWAS Power.	Lung function (FEV1/FVC)	approximately 370,000 European ancestry individuals	NA	17q23.2	17	61184679		BCAS3			ENSG00000141376	NA	NA	rs2204928-?	rs2204928	0	2204928	intron_variant	0	NR	1e-23	23		NA		NR [~ 8900000] (imputed)	N	FEV/FVC ratio	http://www.ebi.ac.uk/efo/EFO_0004713	GCST007080	Genome-wide genotyping array
2019-02-08	30595370	Kichaev G	2018-12-27	Am J Hum Genet	www.ncbi.nlm.nih.gov/pubmed/30595370	Leveraging Polygenic Functional Enrichment to Improve GWAS Power.	Lung function (FVC)	approximately 372,000 European ancestry individuals	NA	3p14.3	3	55784221		ERC2			ENSG00000187672	NA	NA	rs4955883-?	rs4955883	0	4955883	intron_variant	0	NR	9e-11	10.0458		NA		NR [~ 8900000] (imputed)	N	vital capacity	http://www.ebi.ac.uk/efo/EFO_0004312	GCST007081	Genome-wide genotyping array
2019-02-08	30595370	Kichaev G	2018-12-27	Am J Hum Genet	www.ncbi.nlm.nih.gov/pubmed/30595370	Leveraging Polygenic Functional Enrichment to Improve GWAS Power.	Lung function (FEV1/FVC)	approximately 370,000 European ancestry individuals	NA	12p13.33	12	3014800		TEAD4			ENSG00000197905	NA	NA	rs4759434-?	rs4759434	0	4759434	intron_variant	0	NR	1e-12	12		NA		NR [~ 8900000] (imputed)	N	FEV/FVC ratio	http://www.ebi.ac.uk/efo/EFO_0004713	GCST007080	Genome-wide genotyping array
2019-02-08	30595370	Kichaev G	2018-12-27	Am J Hum Genet	www.ncbi.nlm.nih.gov/pubmed/30595370	Leveraging Polygenic Functional Enrichment to Improve GWAS Power.	Lung function (FVC)	approximately 372,000 European ancestry individuals	NA	12p13.33	12	3103092		TSPAN9			ENSG00000011105	NA	NA	rs933414-?	rs933414	0	933414	intron_variant	0	NR	5e-09	8.30103		NA		NR [~ 8900000] (imputed)	N	vital capacity	http://www.ebi.ac.uk/efo/EFO_0004312	GCST007081	Genome-wide genotyping array
2019-02-08	30595370	Kichaev G	2018-12-27	Am J Hum Genet	www.ncbi.nlm.nih.gov/pubmed/30595370	Leveraging Polygenic Functional Enrichment to Improve GWAS Power.	Lung function (FVC)	approximately 372,000 European ancestry individuals	NA	12p13.32	12	3232344		TSPAN9			ENSG00000011105	NA	NA	rs10848835-?	rs10848835	0	10848835	intron_variant	0	NR	6e-12	11.2218		NA		NR [~ 8900000] (imputed)	N	vital capacity	http://www.ebi.ac.uk/efo/EFO_0004312	GCST007081	Genome-wide genotyping array
2019-02-08	30595370	Kichaev G	2018-12-27	Am J Hum Genet	www.ncbi.nlm.nih.gov/pubmed/30595370	Leveraging Polygenic Functional Enrichment to Improve GWAS Power.	Lung function (FVC)	approximately 372,000 European ancestry individuals	NA	10q22.3	10	76552244		LRMDA			ENSG00000148655	NA	NA	rs2637254-?	rs2637254	0	2637254	intron_variant	0	NR	1e-25	25		NA		NR [~ 8900000] (imputed)	N	vital capacity	http://www.ebi.ac.uk/efo/EFO_0004312	GCST007081	Genome-wide genotyping array
2019-02-08	30595370	Kichaev G	2018-12-27	Am J Hum Genet	www.ncbi.nlm.nih.gov/pubmed/30595370	Leveraging Polygenic Functional Enrichment to Improve GWAS Power.	Lung function (FEV1/FVC)	approximately 370,000 European ancestry individuals	NA	10p12.31	10	19872044		PLXDC2			ENSG00000120594	NA	NA	rs72784146-?	rs72784146	0	72784146	intron_variant	0	NR	9e-18	17.0458		NA		NR [~ 8900000] (imputed)	N	FEV/FVC ratio	http://www.ebi.ac.uk/efo/EFO_0004713	GCST007080	Genome-wide genotyping array
2019-02-08	30595370	Kichaev G	2018-12-27	Am J Hum Genet	www.ncbi.nlm.nih.gov/pubmed/30595370	Leveraging Polygenic Functional Enrichment to Improve GWAS Power.	Lung function (FEV1/FVC)	approximately 370,000 European ancestry individuals	NA	10p12.31	10	20921609		NEBL			ENSG00000078114	NA	NA	rs4748734-?	rs4748734	0	4748734	intron_variant	0	NR	2e-14	13.699		NA		NR [~ 8900000] (imputed)	N	FEV/FVC ratio	http://www.ebi.ac.uk/efo/EFO_0004713	GCST007080	Genome-wide genotyping array
2019-02-08	30595370	Kichaev G	2018-12-27	Am J Hum Genet	www.ncbi.nlm.nih.gov/pubmed/30595370	Leveraging Polygenic Functional Enrichment to Improve GWAS Power.	Lung function (FEV1/FVC)	approximately 370,000 European ancestry individuals	NA	10q22.2	10	75899975		LRMDA			ENSG00000148655	NA	NA	rs11594905-?	rs11594905	0	11594905	intron_variant	0	NR	3e-08	7.52288		NA		NR [~ 8900000] (imputed)	N	FEV/FVC ratio	http://www.ebi.ac.uk/efo/EFO_0004713	GCST007080	Genome-wide genotyping array
2019-02-08	30595370	Kichaev G	2018-12-27	Am J Hum Genet	www.ncbi.nlm.nih.gov/pubmed/30595370	Leveraging Polygenic Functional Enrichment to Improve GWAS Power.	Lung function (FEV1/FVC)	approximately 370,000 European ancestry individuals	NA	10q22.3	10	76559121		LRMDA			ENSG00000148655	NA	NA	rs2579762-?	rs2579762	0	2579762	3_prime_UTR_variant	0	NR	1e-21	21		NA		NR [~ 8900000] (imputed)	N	FEV/FVC ratio	http://www.ebi.ac.uk/efo/EFO_0004713	GCST007080	Genome-wide genotyping array
2019-02-08	30595370	Kichaev G	2018-12-27	Am J Hum Genet	www.ncbi.nlm.nih.gov/pubmed/30595370	Leveraging Polygenic Functional Enrichment to Improve GWAS Power.	Lung function (FVC)	approximately 372,000 European ancestry individuals	NA	2p12	2	80420752		CTNNA2			ENSG00000066032	NA	NA	rs1348557-?	rs1348557	0	1348557	intron_variant	0	NR	5e-09	8.30103		NA		NR [~ 8900000] (imputed)	N	vital capacity	http://www.ebi.ac.uk/efo/EFO_0004312	GCST007081	Genome-wide genotyping array
2019-02-08	30595370	Kichaev G	2018-12-27	Am J Hum Genet	www.ncbi.nlm.nih.gov/pubmed/30595370	Leveraging Polygenic Functional Enrichment to Improve GWAS Power.	Lung function (FVC)	approximately 372,000 European ancestry individuals	NA	2p22.1	2	40453009		SLC8A1			ENSG00000183023	NA	NA	rs2301343-?	rs2301343	0	2301343	intron_variant	0	NR	4e-08	7.39794		NA		NR [~ 8900000] (imputed)	N	vital capacity	http://www.ebi.ac.uk/efo/EFO_0004312	GCST007081	Genome-wide genotyping array
2019-02-08	30595370	Kichaev G	2018-12-27	Am J Hum Genet	www.ncbi.nlm.nih.gov/pubmed/30595370	Leveraging Polygenic Functional Enrichment to Improve GWAS Power.	Lung function (FVC)	approximately 372,000 European ancestry individuals	NA	9p21.1	9	29153471		LINGO2			ENSG00000174482	NA	NA	rs7870900-?	rs7870900	0	7870900	intron_variant	0	NR	2e-10	9.69897		NA		NR [~ 8900000] (imputed)	N	vital capacity	http://www.ebi.ac.uk/efo/EFO_0004312	GCST007081	Genome-wide genotyping array
2019-02-08	30595370	Kichaev G	2018-12-27	Am J Hum Genet	www.ncbi.nlm.nih.gov/pubmed/30595370	Leveraging Polygenic Functional Enrichment to Improve GWAS Power.	Lung function (FEV1/FVC)	approximately 370,000 European ancestry individuals	NA	13q14.11	13	43511809		ENOX1			ENSG00000120658	NA	NA	rs3884613-?	rs3884613	0	3884613	intron_variant	0	NR	4e-08	7.39794		NA		NR [~ 8900000] (imputed)	N	FEV/FVC ratio	http://www.ebi.ac.uk/efo/EFO_0004713	GCST007080	Genome-wide genotyping array
2021-11-08	33766948	Zhu Z	2021-03-25	Eur Respir J	www.ncbi.nlm.nih.gov/pubmed/33766948	A large-scale genome-wide association analysis of lung function in the Chinese population identifies novel loci and highlights shared genetic etiology with obesity.	Lung function (FEV1)	100,285 Chinese ancestry individuals	NA	17q23.2	17	61208902		BCAS3			ENSG00000141376	NA	NA	rs11651885-G	rs11651885	0	11651885	intron_variant	0	0.21	3e-08	7.52288		0.031	L increase	Affymetrix [NR] (imputed)	N	forced expiratory volume	http://www.ebi.ac.uk/efo/EFO_0004314	GCST90054783	Genome-wide genotyping array
2021-07-27	34211149	Mills MC	2021-07-01	Nat Hum Behav	www.ncbi.nlm.nih.gov/pubmed/34211149	Identification of 371 genetic variants for age at first sex and birth linked to externalising behaviour.	Age at first sexual intercourse	397,338 European ancestry individuals	NA	3p14.2	3	60893866	FHIT	FHIT			ENSG00000189283	NA	NA	rs6764919-G	rs6764919	0	6764919	intron_variant	0	0.736662	2e-09	8.69897		0.0135312	[0.0089-0.0181] unit increase	NR [16516521] (imputed)	N	age at first sexual intercourse measurement	http://www.ebi.ac.uk/efo/EFO_0009749	GCST90000047	Genome-wide genotyping array
2021-07-27	34211149	Mills MC	2021-07-01	Nat Hum Behav	www.ncbi.nlm.nih.gov/pubmed/34211149	Identification of 371 genetic variants for age at first sex and birth linked to externalising behaviour.	Age at first sexual intercourse	397,338 European ancestry individuals	NA	3p12.1	3	85601191	CADM2	CADM2			ENSG00000175161	NA	NA	rs112523595-T	rs112523595	0	112523595	intron_variant	0	0.371681	1e-28	28		0.0239595	[0.02-0.028] unit decrease	NR [16516521] (imputed)	N	age at first sexual intercourse measurement	http://www.ebi.ac.uk/efo/EFO_0009749	GCST90000047	Genome-wide genotyping array
2021-07-27	34211149	Mills MC	2021-07-01	Nat Hum Behav	www.ncbi.nlm.nih.gov/pubmed/34211149	Identification of 371 genetic variants for age at first sex and birth linked to externalising behaviour.	Age at first sexual intercourse	397,338 European ancestry individuals	NA	3q13.31	3	116164629	LSAMP	LSAMP			ENSG00000185565	NA	NA	rs369789482-AAT	rs369789482	0	369789482	intron_variant	0	0.758154	5e-08	7.30103		0.0130637	[0.0082-0.0179] unit increase	NR [16516521] (imputed)	N	age at first sexual intercourse measurement	http://www.ebi.ac.uk/efo/EFO_0009749	GCST90000047	Genome-wide genotyping array
2021-12-09	33713768	Akenroye AT	2021-03-10	J Allergy Clin Immunol	www.ncbi.nlm.nih.gov/pubmed/33713768	Genome-wide Association study of Asthma, Total IgE, and Lung function in a Cohort of Peruvian Children.	Asthma (childhood onset)	436 Peruvian cases, 291 Peruvian controls	NA	3q22.2	3	134992705		EPHB1			ENSG00000154928	NA	NA	rs39697-?	rs39697	0	39697	intron_variant	0	NR	2e-06	5.69897		1.88702	unit increase	Illumina [NR] (imputed)	N	childhood onset asthma	http://purl.obolibrary.org/obo/MONDO_0005405	GCST90091010	Genome-wide genotyping array
2023-05-31	36641522	Sinkala M	2023-01-14	Commun Biol	www.ncbi.nlm.nih.gov/pubmed/36641522	A genome-wide association study identifies distinct variants associated with pulmonary function among European and African ancestries from the UK Biobank.	FVC	383,471 European ancestry individuals	NA	12p13.32	12	3242003		TSPAN9			ENSG00000011105	NA	NA	rs74576293-?	rs74576293	0	74576293	intron_variant	0	NR	2e-12	11.699		NA		NR [NR] (imputed)	N	vital capacity	http://www.ebi.ac.uk/efo/EFO_0004312	GCST90270083	Genome-wide genotyping array
2023-05-31	36641522	Sinkala M	2023-01-14	Commun Biol	www.ncbi.nlm.nih.gov/pubmed/36641522	A genome-wide association study identifies distinct variants associated with pulmonary function among European and African ancestries from the UK Biobank.	FVC	383,471 European ancestry individuals	NA	20q13.12	20	46943721		EYA2			ENSG00000064655	NA	NA	rs1206743-?	rs1206743	0	1206743	intron_variant	0	NR	7e-11	10.1549		NA		NR [NR] (imputed)	N	vital capacity	http://www.ebi.ac.uk/efo/EFO_0004312	GCST90270083	Genome-wide genotyping array
2023-05-31	36641522	Sinkala M	2023-01-14	Commun Biol	www.ncbi.nlm.nih.gov/pubmed/36641522	A genome-wide association study identifies distinct variants associated with pulmonary function among European and African ancestries from the UK Biobank.	FVC	383,471 European ancestry individuals	NA	5q35.1	5	171431190		FGF18			ENSG00000156427	NA	NA	rs75073573-?	rs75073573	0	75073573	intron_variant	0	NR	5e-18	17.301		NA		NR [NR] (imputed)	N	vital capacity	http://www.ebi.ac.uk/efo/EFO_0004312	GCST90270083	Genome-wide genotyping array
2023-12-12	36914875	Shrine N	2023-03-13	Nat Genet	www.ncbi.nlm.nih.gov/pubmed/36914875	Multi-ancestry genome-wide association analyses improve resolution of genes and pathways influencing lung function and chronic obstructive pulmonary disease risk.	Lung function (FEV1)	475,645 European ancestry individuals, 8,590 African ancestry individuals, 85,279 East Asian ancestry individuals, 4,270 South Asian ancestry individuals, 14,668 Hispanic or Latin American individuals	NA	10q22.3	10	76559121		LRMDA			ENSG00000148655	NA	NA	rs2579762-A	rs2579762	0	2579762	3_prime_UTR_variant	0	0.546	3e-42	41.5229		13.626	z score increase	Affymetrix, Illumina [63380712] (imputed)	N	forced expiratory volume	http://www.ebi.ac.uk/efo/EFO_0004314	GCST90244092	Genome-wide genotyping array
2023-12-12	36914875	Shrine N	2023-03-13	Nat Genet	www.ncbi.nlm.nih.gov/pubmed/36914875	Multi-ancestry genome-wide association analyses improve resolution of genes and pathways influencing lung function and chronic obstructive pulmonary disease risk.	Lung function (FEV1/FVC)	475,645 European ancestry individuals, 8,590 African ancestry individuals, 85,279 East Asian ancestry individuals, 4,270 South Asian ancestry individuals, 14,668 Hispanic or Latin American individuals	NA	10p12.31	10	20939599		NEBL			ENSG00000078114	NA	NA	rs11012405-A	rs11012405	0	11012405	intron_variant	0	0.633	7e-11	10.1549		6.522	z score decrease	Affymetrix, Illumina [63372103] (imputed)	N	FEV/FVC ratio	http://www.ebi.ac.uk/efo/EFO_0004713	GCST90244094	Genome-wide genotyping array
2023-12-12	36914875	Shrine N	2023-03-13	Nat Genet	www.ncbi.nlm.nih.gov/pubmed/36914875	Multi-ancestry genome-wide association analyses improve resolution of genes and pathways influencing lung function and chronic obstructive pulmonary disease risk.	Lung function (forced vital capacity)	475,645 European ancestry individuals, 8,590 African ancestry individuals, 85,279 East Asian ancestry individuals, 4,270 South Asian ancestry individuals, 14,668 Hispanic or Latin American individuals	NA	20q13.12	20	46903483		EYA2			ENSG00000064655	NA	NA	rs6124883-T	rs6124883	0	6124883	intron_variant	0	0.461	5e-28	27.301		10.98	z score decrease	Affymetrix, Illumina [63372548] (imputed)	N	vital capacity	http://www.ebi.ac.uk/efo/EFO_0004312	GCST90244093	Genome-wide genotyping array
2023-12-12	36914875	Shrine N	2023-03-13	Nat Genet	www.ncbi.nlm.nih.gov/pubmed/36914875	Multi-ancestry genome-wide association analyses improve resolution of genes and pathways influencing lung function and chronic obstructive pulmonary disease risk.	Lung function (forced vital capacity)	475,645 European ancestry individuals, 8,590 African ancestry individuals, 85,279 East Asian ancestry individuals, 4,270 South Asian ancestry individuals, 14,668 Hispanic or Latin American individuals	NA	3q21.1	3	122409672		FAM162A			ENSG00000114023	NA	NA	rs10511410-C	rs10511410	0	10511410	3_prime_UTR_variant	0	0.27	6e-12	11.2218		6.877	z score decrease	Affymetrix, Illumina [63372548] (imputed)	N	vital capacity	http://www.ebi.ac.uk/efo/EFO_0004312	GCST90244093	Genome-wide genotyping array
2023-12-12	36914875	Shrine N	2023-03-13	Nat Genet	www.ncbi.nlm.nih.gov/pubmed/36914875	Multi-ancestry genome-wide association analyses improve resolution of genes and pathways influencing lung function and chronic obstructive pulmonary disease risk.	Lung function (FEV1/FVC)	475,645 European ancestry individuals, 8,590 African ancestry individuals, 85,279 East Asian ancestry individuals, 4,270 South Asian ancestry individuals, 14,668 Hispanic or Latin American individuals	NA	3p14.3	3	55748741		ERC2			ENSG00000187672	NA	NA	rs2132237-A	rs2132237	0	2132237	intron_variant	0	0.576	1e-09	9		6.084	z score increase	Affymetrix, Illumina [63372103] (imputed)	N	FEV/FVC ratio	http://www.ebi.ac.uk/efo/EFO_0004713	GCST90244094	Genome-wide genotyping array
2023-12-12	36914875	Shrine N	2023-03-13	Nat Genet	www.ncbi.nlm.nih.gov/pubmed/36914875	Multi-ancestry genome-wide association analyses improve resolution of genes and pathways influencing lung function and chronic obstructive pulmonary disease risk.	Lung function (FEV1/FVC)	475,645 European ancestry individuals, 8,590 African ancestry individuals, 85,279 East Asian ancestry individuals, 4,270 South Asian ancestry individuals, 14,668 Hispanic or Latin American individuals	NA	3p14.3	3	56201376		ERC2			ENSG00000187672	NA	NA	rs7641482-T	rs7641482	0	7641482	intron_variant	0	0.77	8e-14	13.0969		7.479	z score decrease	Affymetrix, Illumina [63372103] (imputed)	N	FEV/FVC ratio	http://www.ebi.ac.uk/efo/EFO_0004713	GCST90244094	Genome-wide genotyping array
2023-12-12	36914875	Shrine N	2023-03-13	Nat Genet	www.ncbi.nlm.nih.gov/pubmed/36914875	Multi-ancestry genome-wide association analyses improve resolution of genes and pathways influencing lung function and chronic obstructive pulmonary disease risk.	Lung function (FEV1/FVC)	475,645 European ancestry individuals, 8,590 African ancestry individuals, 85,279 East Asian ancestry individuals, 4,270 South Asian ancestry individuals, 14,668 Hispanic or Latin American individuals	NA	10p12.31	10	19927318		PLXDC2			ENSG00000120594	NA	NA	rs17758689-T	rs17758689	0	17758689	intron_variant	0	0.0711	2e-13	12.699		7.382	z score increase	Affymetrix, Illumina [63372103] (imputed)	N	FEV/FVC ratio	http://www.ebi.ac.uk/efo/EFO_0004713	GCST90244094	Genome-wide genotyping array
2023-12-12	36914875	Shrine N	2023-03-13	Nat Genet	www.ncbi.nlm.nih.gov/pubmed/36914875	Multi-ancestry genome-wide association analyses improve resolution of genes and pathways influencing lung function and chronic obstructive pulmonary disease risk.	Lung function (forced vital capacity)	475,645 European ancestry individuals, 8,590 African ancestry individuals, 85,279 East Asian ancestry individuals, 4,270 South Asian ancestry individuals, 14,668 Hispanic or Latin American individuals	NA	12p13.32	12	3209092		TSPAN9			ENSG00000011105	NA	NA	rs2335666-A	rs2335666	0	2335666	intron_variant	0	0.264	3e-10	9.52288		6.323	z score decrease	Affymetrix, Illumina [63372548] (imputed)	N	vital capacity	http://www.ebi.ac.uk/efo/EFO_0004312	GCST90244093	Genome-wide genotyping array
2023-12-12	36914875	Shrine N	2023-03-13	Nat Genet	www.ncbi.nlm.nih.gov/pubmed/36914875	Multi-ancestry genome-wide association analyses improve resolution of genes and pathways influencing lung function and chronic obstructive pulmonary disease risk.	Lung function (forced vital capacity)	475,645 European ancestry individuals, 8,590 African ancestry individuals, 85,279 East Asian ancestry individuals, 4,270 South Asian ancestry individuals, 14,668 Hispanic or Latin American individuals	NA	12p13.32	12	3281031		TSPAN9			ENSG00000011105	NA	NA	rs66462026-T	rs66462026	0	66462026	intron_variant	0	0.0614	7e-10	9.1549		6.167	z score increase	Affymetrix, Illumina [63372548] (imputed)	N	vital capacity	http://www.ebi.ac.uk/efo/EFO_0004312	GCST90244093	Genome-wide genotyping array
2023-12-12	36914875	Shrine N	2023-03-13	Nat Genet	www.ncbi.nlm.nih.gov/pubmed/36914875	Multi-ancestry genome-wide association analyses improve resolution of genes and pathways influencing lung function and chronic obstructive pulmonary disease risk.	Lung function (FEV1/FVC)	475,645 European ancestry individuals, 8,590 African ancestry individuals, 85,279 East Asian ancestry individuals, 4,270 South Asian ancestry individuals, 14,668 Hispanic or Latin American individuals	NA	17q23.2	17	61208902		BCAS3			ENSG00000141376	NA	NA	rs11651885-A	rs11651885	0	11651885	intron_variant	0	0.766	2e-28	27.699		11.059	z score decrease	Affymetrix, Illumina [63372103] (imputed)	N	FEV/FVC ratio	http://www.ebi.ac.uk/efo/EFO_0004713	GCST90244094	Genome-wide genotyping array
2024-04-16	36777996	Zhou W	2022-10-12	Cell Genom	www.ncbi.nlm.nih.gov/pubmed/36777996	Global Biobank Meta-analysis Initiative: Powering genetic discovery across human disease.	Asthma	139 Middle Eastern ancestry cases, 1,434 Middle Eastern ancestry controls, 4,069 Admixed American ancestry cases, 14,104 Admixed American ancestry controls, 4,015 South Asian ancestry cases, 27,091 South Asian ancestry controls, 5,051 African ancestry cases, 27,607 African ancestry controls, 18,549 East Asian ancestry cases, 322,655 East Asian ancestry controls, 121,940 European ancestry cases, 1…	180 Admixed American ancestry cases, 1,325 Admixed American ancestry controls, 2,455 African ancestry cases, 7,542 African ancestry controls, 1,375 Middle Eastern ancestry cases, 12,684 Middle Eastern ancestry controls, 5,981 European ancestry cases, 42,054 European ancestry controls	22q13.1	22	38117109		PLA2G6			ENSG00000184381	NA	NA	rs71806630-AAGTC	rs71806630	0	71806630	intron_variant	0	0.2957	2e-10	9.69897		0.034969	[0.024-0.046] unit decrease	Illumina [NR] (imputed)	N	asthma	http://purl.obolibrary.org/obo/MONDO_0004979	GCST90399687	Genome-wide genotyping array
2021-07-27	34211149	Mills MC	2021-07-01	Nat Hum Behav	www.ncbi.nlm.nih.gov/pubmed/34211149	Identification of 371 genetic variants for age at first sex and birth linked to externalising behaviour.	Age at first sexual intercourse	397,338 European ancestry individuals	NA	11q14.1	11	80176505	intergenic	TENM4 - RNU6-544P	ENSG00000149256	ENSG00000200146		735475	351455	rs4439537-T	rs4439537	0	4439537	intergenic_variant	1	0.476299	1e-10	10		0.0131615	[0.0091-0.0172] unit decrease	NR [16516521] (imputed)	N	age at first sexual intercourse measurement	http://www.ebi.ac.uk/efo/EFO_0009749	GCST90000047	Genome-wide genotyping array
