# Supplementary material for: Genome-wide association analyses in dairy heifers highlight genes overlapping with mouse and human fertility and human health traits
Source: Research Square preprint supplement (doi:10.21203/rs.3.rs-6463477/v1), 2025-05-05
Supplement: Supplementary file 6 [file 9c30979efba206ef1f776eb2.xlsx]

## Sheet: health_results_fisher
Additional file 4. Results of analysis of health.
Fisher allelic test										Fisher dominance test of the reference alleale									Fisher recessive test of the reference alleale
CHR	SNP	BP	A1	F_A	F_U	A2	P	OR		CHR	SNP	A1	A2	TEST	AFF	UNAFF	P		CHR	SNP	A1	A2	TEST	AFF	UNAFF	P
1	BovineHD0100000005	655346	1	0.5	0.4241	2	0.4401	1.358		1	BovineHD0100000005	1	2	DOM	9/5	184/86	0.7735		1	BovineHD0100000005	1	2	REC	5/9	45/225	0.0787
1	BovineHD0100000026	719789	2	0.5357	0.4852	1	0.6994	1.224		1	BovineHD0100000026	2	1	DOM	10/4	205/66	0.752		1	BovineHD0100000026	2	1	REC	5/9	58/213	0.2015
1	BovineHD0100000035	761316	2	0.3929	0.3672	1	0.8416	1.115		1	BovineHD0100000035	2	1	DOM	8/6	161/110	1		1	BovineHD0100000035	2	1	REC	3/11	38/233	0.4334
1	Hapmap43437-BTA-101873	776231	1	0.5	0.4225	2	0.4387	1.367		1	Hapmap43437-BTA-101873	1	2	DOM	9/5	185/86	0.7729		1	Hapmap43437-BTA-101873	1	2	REC	5/9	44/227	0.07205
1	BovineHD0100000051	805126	1	0.5357	0.4667	2	0.5615	1.319		1	BovineHD0100000051	1	2	DOM	10/4	198/72	1		1	BovineHD0100000051	1	2	REC	5/9	54/216	0.1768
1	BovineHD0100000057	824172	1	0.5357	0.3241	2	0.02459	2.407		1	BovineHD0100000057	1	2	DOM	11/3	146/124	0.09805		1	BovineHD0100000057	1	2	REC	4/10	29/241	0.0653
1	BovineHD0100000066	842891	2	0.5357	0.4086	1	0.2374	1.67		1	BovineHD0100000066	2	1	DOM	11/3	171/97	0.3915		1	BovineHD0100000066	2	1	REC	4/10	48/220	0.2992
1	BovineHD0100000064	849544	1	0.5357	0.3685	2	0.1078	1.977		1	BovineHD0100000064	1	2	DOM	11/3	161/109	0.2611		1	BovineHD0100000064	1	2	REC	4/10	38/232	0.1358
1	BovineHD0100000067	858145	2	0.4286	0.2768	1	0.0888	1.96		1	BovineHD0100000067	2	1	DOM	9/5	130/141	0.2799		1	BovineHD0100000067	2	1	REC	3/11	20/251	0.0929
1	ARS-BFGL-NGS-16466	907810	2	0.1071	0.09225	1	0.7375	1.181		1	ARS-BFGL-NGS-16466	2	1	DOM	3/11	49/222	0.7253		1	ARS-BFGL-NGS-16466	2	1	REC	0/14	1/270	1
1	BovineHD0100000077	914796	1	0.1071	0.1157	2	1	0.9174		1	BovineHD0100000077	1	2	DOM	3/11	60/208	1		1	BovineHD0100000077	1	2	REC	0/14	2/266	1
1	BovineHD0100000079	918822	1	0.1071	0.1222	2	1	0.8618		1	BovineHD0100000079	1	2	DOM	3/11	64/206	1		1	BovineHD0100000079	1	2	REC	0/14	2/268	1
1	BovineHD0100000081	928563	2	0.1071	0.1157	1	1	0.9174		1	BovineHD0100000081	2	1	DOM	3/11	60/208	1		1	BovineHD0100000081	2	1	REC	0/14	2/266	1
1	BovineHD0100000082	930560	1	0.4286	0.4093	2	0.8461	1.083		1	BovineHD0100000082	1	2	DOM	9/5	168/102	1		1	BovineHD0100000082	1	2	REC	3/11	53/217	0.743
1	BovineHD0100000106	1001634	2	0	0.137	1	0.03818	0		1	BovineHD0100000106	2	1	DOM	0/14	66/204	0.04538		1	BovineHD0100000106	2	1	REC	0/14	8/262	1
1	BovineHD0100000110	1016283	2	0	0.187	1	0.004911	0		1	BovineHD0100000110	2	1	DOM	0/14	90/180	0.006207		1	BovineHD0100000110	2	1	REC	0/14	11/259	1
1	Hapmap34944-BES1_Contig627_1906	1032564	2	0.5357	0.3137	1	0.0213	2.525		1	Hapmap34944-BES1_Contig627_1906	2	1	DOM	11/3	142/129	0.09599		1	Hapmap34944-BES1_Contig627_1906	2	1	REC	4/10	28/243	0.0585
1	BovineHD0100000136	1052361	2	0.1786	0.4389	1	0.005969	0.2779		1	BovineHD0100000136	2	1	DOM	5/9	186/84	0.01658		1	BovineHD0100000136	2	1	REC	0/14	51/219	0.08196
1	BovineHD0100000137	1055397	1	0.1071	0.0653	2	0.425	1.718		1	BovineHD0100000137	1	2	DOM	3/11	34/234	0.4061		1	BovineHD0100000137	1	2	REC	0/14	1/267	1
1	BovineHD0100000151	1091658	1	0.03571	0.2333	2	0.00988	0.1217		1	BovineHD0100000151	1	2	DOM	1/13	117/153	0.009648		1	BovineHD0100000151	1	2	REC	0/14	9/261	1
1	BovineHD0100000155	1098033	2	0.4286	0.45	1	0.8485	0.9167		1	BovineHD0100000155	2	1	DOM	9/5	193/77	0.5547		1	BovineHD0100000155	2	1	REC	3/11	50/220	0.73
1	BovineHD0100000161	1104577	2	0.03571	0.2333	1	0.00988	0.1217		1	BovineHD0100000161	2	1	DOM	1/13	117/153	0.009648		1	BovineHD0100000161	2	1	REC	0/14	9/261	1
1	ARS-BFGL-NGS-98142	1110393	2	0.5357	0.3801	1	0.1131	1.882		1	ARS-BFGL-NGS-98142	2	1	DOM	11/3	166/105	0.2625		1	ARS-BFGL-NGS-98142	2	1	REC	4/10	40/231	0.2434
1	BovineHD0100000166	1112539	2	0.03571	0.2333	1	0.00988	0.1217		1	BovineHD0100000166	2	1	DOM	1/13	117/153	0.009648		1	BovineHD0100000166	2	1	REC	0/14	9/261	1
1	BovineHD0100000170	1126372	1	0.07143	0.4037	2	0.0002117	0.1136		1	BovineHD0100000170	1	2	DOM	2/12	179/91	0.0001463		1	BovineHD0100000170	1	2	REC	0/14	39/231	0.2293
1	Hapmap53946-rs29015852	1150763	2	0.03571	0.1734	1	0.06638	0.1765		1	Hapmap53946-rs29015852	2	1	DOM	1/13	85/186	0.07154		1	Hapmap53946-rs29015852	2	1	REC	0/14	9/262	1
1	BovineHD0100000183	1188534	2	0.03571	0.213	1	0.02699	0.1369		1	BovineHD0100000183	2	1	DOM	1/13	101/169	0.02165		1	BovineHD0100000183	2	1	REC	0/14	14/256	1
1	BovineHD0100000200	1235550	2	0.5357	0.474	1	0.5645	1.281		1	BovineHD0100000200	2	1	DOM	11/3	193/76	0.7638		1	BovineHD0100000200	2	1	REC	4/10	62/207	0.7454
1	BovineHD0100000221	1375784	2	0.03571	0.1667	1	0.0672	0.1852		1	BovineHD0100000221	2	1	DOM	1/13	82/188	0.07338		1	BovineHD0100000221	2	1	REC	0/14	8/262	1
1	BovineHD0100000231	1406817	2	0.03571	0.1722	1	0.06633	0.178		1	BovineHD0100000231	2	1	DOM	1/13	84/186	0.07183		1	BovineHD0100000231	2	1	REC	0/14	9/261	1
1	BovineHD0100000234	1416198	2	0.3929	0.3489	1	0.686	1.208		1	BovineHD0100000234	2	1	DOM	8/6	157/111	1		1	BovineHD0100000234	2	1	REC	3/11	30/238	0.2167
1	BovineHD0100000242	1459085	1	0.4643	0.4033	2	0.5572	1.282		1	BovineHD0100000242	1	2	DOM	9/5	178/91	1		1	BovineHD0100000242	1	2	REC	4/10	39/230	0.2404
1	BovineHD0100000244	1469010	2	0.03571	0.1365	1	0.1564	0.2342		1	BovineHD0100000244	2	1	DOM	1/13	72/199	0.1262		1	BovineHD0100000244	2	1	REC	0/14	2/269	1
1	BovineHD0100000252	1523007	1	0.4286	0.4742	2	0.7006	0.8317		1	BovineHD0100000252	1	2	DOM	9/5	190/81	0.7658		1	BovineHD0100000252	1	2	REC	3/11	67/204	1
1	BovineHD0100000257	1540641	2	0.1786	0.3093	1	0.2044	0.4856		1	BovineHD0100000257	2	1	DOM	5/9	140/130	0.281		1	BovineHD0100000257	2	1	REC	0/14	27/243	0.3757
1	BovineHD0100000261	1556392	1	0.5357	0.3759	2	0.1106	1.915		1	BovineHD0100000261	1	2	DOM	10/4	166/104	0.578		1	BovineHD0100000261	1	2	REC	5/9	37/233	0.0401
1	BovineHD0100000280	1587057	1	0.5714	0.4241	2	0.1698	1.811		1	BovineHD0100000280	1	2	DOM	11/3	180/90	0.56		1	BovineHD0100000280	1	2	REC	5/9	49/221	0.1524
1	ARS-BFGL-NGS-65067	1604940	1	0.03571	0.3579	2	0.0001367	0.06644		1	ARS-BFGL-NGS-65067	1	2	DOM	1/13	160/111	0.0001198		1	ARS-BFGL-NGS-65067	1	2	REC	0/14	34/237	0.3871
1	BovineHD0100000293	1621844	1	0.4643	0.4111	2	0.6945	1.241		1	BovineHD0100000293	1	2	DOM	10/4	175/95	0.7768		1	BovineHD0100000293	1	2	REC	3/11	47/223	0.7187
1	BovineHD0100000296	1625016	2	0.4643	0.4176	1	0.6959	1.209		1	BovineHD0100000296	2	1	DOM	9/5	182/85	0.7733		1	BovineHD0100000296	2	1	REC	4/10	41/226	0.2512
1	BovineHD0100000297	1627573	1	0.1429	0.2407	2	0.3597	0.5256		1	BovineHD0100000297	1	2	DOM	4/10	113/157	0.4105		1	BovineHD0100000297	1	2	REC	0/14	17/253	1
1	ARS-BFGL-BAC-34682	1671886	2	0	0.0572	1	0.3907	0		1	ARS-BFGL-BAC-34682	2	1	DOM	0/14	31/240	0.377		1	ARS-BFGL-BAC-34682	2	1	REC	0/14	0/271	1
1	BovineHD0100000319	1685880	2	0.1786	0.3815	1	0.04287	0.3525		1	BovineHD0100000319	2	1	DOM	5/9	165/105	0.09041		1	BovineHD0100000319	2	1	REC	0/14	41/229	0.2333
1	ARS-BFGL-NGS-98203	1730547	1	0.5357	0.4686	2	0.5622	1.308		1	ARS-BFGL-NGS-98203	1	2	DOM	11/3	191/80	0.7638		1	ARS-BFGL-NGS-98203	1	2	REC	4/10	63/208	0.7463
1	BovineHD0100000344	1761967	2	0.4286	0.4685	1	0.7029	0.8508		1	BovineHD0100000344	2	1	DOM	9/5	187/83	0.7685		1	BovineHD0100000344	2	1	REC	3/11	66/204	1
1	BovineHD0100000350	1784777	2	0.4286	0.4114	1	0.8468	1.073		1	BovineHD0100000350	2	1	DOM	9/5	169/102	1		1	BovineHD0100000350	2	1	REC	3/11	54/217	1
1	BovineHD0100000354	1802755	2	0.4643	0.4778	1	1	0.9473		1	BovineHD0100000354	2	1	DOM	10/4	192/78	1		1	BovineHD0100000354	2	1	REC	3/11	66/204	1
1	BovineHD0100000360	1821203	1	0.1071	0.1866	2	0.4499	0.5232		1	BovineHD0100000360	1	2	DOM	3/11	90/178	0.5605		1	BovineHD0100000360	1	2	REC	0/14	10/258	1
1	ARS-BFGL-BAC-2376	1834781	2	0.5357	0.4502	1	0.438	1.409		1	ARS-BFGL-BAC-2376	2	1	DOM	11/3	190/81	0.7643		1	ARS-BFGL-BAC-2376	2	1	REC	4/10	54/217	0.4939
1	BovineHD0100000370	1852426	2	0.1071	0.1231	1	1	0.8545		1	BovineHD0100000370	2	1	DOM	3/11	64/204	1		1	BovineHD0100000370	2	1	REC	0/14	2/266	1
1	BovineHD0100000373	1863496	2	0.03571	0.1402	1	0.156	0.2271		1	BovineHD0100000373	2	1	DOM	1/13	70/201	0.2011		1	BovineHD0100000373	2	1	REC	0/14	6/265	1
1	BovineHD0100000382	1917241	1	0.07143	0.3241	2	0.003062	0.1604		1	BovineHD0100000382	1	2	DOM	2/12	144/126	0.005018		1	BovineHD0100000382	1	2	REC	0/14	31/239	0.3772
1	BovineHD0100000391	1968406	1	0.5	0.3963	2	0.324	1.523		1	BovineHD0100000391	1	2	DOM	9/5	176/94	1		1	BovineHD0100000391	1	2	REC	5/9	38/232	0.04405
1	ARS-BFGL-BAC-7196	1984725	2	0.1071	0.04428	1	0.1407	2.59		1	ARS-BFGL-BAC-7196	2	1	DOM	3/11	24/247	0.1361		1	ARS-BFGL-BAC-7196	2	1	REC	0/14	0/271	1
1	ARS-BFGL-BAC-12931	2008865	1	0.1071	0.1125	2	1	0.9462		1	ARS-BFGL-BAC-12931	1	2	DOM	3/11	55/216	1		1	ARS-BFGL-BAC-12931	1	2	REC	0/14	6/265	1
1	BovineHD0100000402	2010236	1	0.5	0.2889	2	0.03185	2.462		1	BovineHD0100000402	1	2	DOM	9/5	138/132	0.4163		1	BovineHD0100000402	1	2	REC	5/9	18/252	0.002749
1	BovineHD0100000406	2024917	1	0.5	0.3519	2	0.1558	1.842		1	BovineHD0100000406	1	2	DOM	9/5	157/113	0.7841		1	BovineHD0100000406	1	2	REC	5/9	33/237	0.02661
1	ARS-BFGL-BAC-14857	2058539	2	0.5	0.2841	1	0.0192	2.519		1	ARS-BFGL-BAC-14857	2	1	DOM	9/5	138/133	0.4155		1	ARS-BFGL-BAC-14857	2	1	REC	5/9	16/255	0.001731
1	Hapmap53766-ss46526150	2082139	2	0.5	0.428	1	0.558	1.336		1	Hapmap53766-ss46526150	2	1	DOM	9/5	181/90	1		1	Hapmap53766-ss46526150	2	1	REC	5/9	51/220	0.1601
1	BovineHD0100000426	2086121	2	0.1071	0.1852	1	0.4493	0.528		1	BovineHD0100000426	2	1	DOM	3/11	89/181	0.5594		1	BovineHD0100000426	2	1	REC	0/14	11/259	1
1	ARS-BFGL-NGS-115971	2107796	2	0.5357	0.441	1	0.3368	1.463		1	ARS-BFGL-NGS-115971	2	1	DOM	10/4	182/89	1		1	ARS-BFGL-NGS-115971	2	1	REC	5/9	57/214	0.1945
1	BovineHD0100000434	2119684	1	0.03571	0.1759	2	0.06663	0.1735		1	BovineHD0100000434	1	2	DOM	1/13	87/183	0.0713		1	BovineHD0100000434	1	2	REC	0/14	8/262	1
1	BovineHD0100000436	2128341	2	0	0.06134	1	0.3973	0		1	BovineHD0100000436	2	1	DOM	0/14	31/238	0.3774		1	BovineHD0100000436	2	1	REC	0/14	2/267	1
1	ARS-BFGL-NGS-62826	2158691	2	0	0.06089	1	0.3965	0		1	ARS-BFGL-NGS-62826	2	1	DOM	0/14	31/240	0.377		1	ARS-BFGL-NGS-62826	2	1	REC	0/14	2/269	1
1	BovineHD0100000445	2172213	1	0.03571	0.2037	2	0.02638	0.1448		1	BovineHD0100000445	1	2	DOM	1/13	100/170	0.02219		1	BovineHD0100000445	1	2	REC	0/14	10/260	1
1	BovineHD0100000449	2192489	2	0.5357	0.476	1	0.5658	1.27		1	BovineHD0100000449	2	1	DOM	10/4	191/80	1		1	BovineHD0100000449	2	1	REC	5/9	67/204	0.3539
1	BovineHD0100000455	2214296	2	0.07143	0.3537	1	0.001587	0.1406		1	BovineHD0100000455	2	1	DOM	2/12	158/112	0.001477		1	BovineHD0100000455	2	1	REC	0/14	33/237	0.3834
1	BovineHD0100000459	2229077	2	0.5	0.3741	1	0.2304	1.673		1	BovineHD0100000459	2	1	DOM	9/5	170/100	1		1	BovineHD0100000459	2	1	REC	5/9	32/238	0.0238
1	BTA-39394-no-rs	2235492	1	0.1071	0.1771	2	0.4485	0.5575		1	BTA-39394-no-rs	1	2	DOM	3/11	88/183	0.5593		1	BTA-39394-no-rs	1	2	REC	0/14	8/263	1
1	BovineHD0100000488	2279667	1	0.4286	0.363	2	0.5473	1.316		1	BovineHD0100000488	1	2	DOM	9/5	160/110	0.7866		1	BovineHD0100000488	1	2	REC	3/11	36/234	0.4185
1	BovineHD0100000504	2299194	1	0.1429	0.2907	2	0.1301	0.4066		1	BovineHD0100000504	1	2	DOM	4/10	134/136	0.1711		1	BovineHD0100000504	1	2	REC	0/14	23/247	0.6134
1	ARS-BFGL-NGS-105306	2305128	1	0.1429	0.2934	2	0.1308	0.4015		1	ARS-BFGL-NGS-105306	1	2	DOM	4/10	135/136	0.1706		1	ARS-BFGL-NGS-105306	1	2	REC	0/14	24/247	0.6164
1	BovineHD0100000526	2374280	1	0.1071	0.1426	2	0.7837	0.7216		1	BovineHD0100000526	1	2	DOM	3/11	71/199	1		1	BovineHD0100000526	1	2	REC	0/14	6/264	1
1	BovineHD0100000531	2379674	2	0.1071	0.1759	1	0.4488	0.5621		1	BovineHD0100000531	2	1	DOM	3/11	86/184	0.5598		1	BovineHD0100000531	2	1	REC	0/14	9/261	1
1	ARS-BFGL-NGS-39992	2391777	1	0.1071	0.1827	2	0.4485	0.537		1	ARS-BFGL-NGS-39992	1	2	DOM	3/11	90/181	0.5598		1	ARS-BFGL-NGS-39992	1	2	REC	0/14	9/262	1
1	ARS-BFGL-BAC-13059	2482685	1	0	0.04797	2	0.6313	0		1	ARS-BFGL-BAC-13059	1	2	DOM	0/14	25/246	0.6204		1	ARS-BFGL-BAC-13059	1	2	REC	0/14	1/270	1
1	ARS-BFGL-NGS-11433	2574098	1	0.3571	0.214	2	0.09893	2.04		1	ARS-BFGL-NGS-11433	1	2	DOM	8/6	105/166	0.2615		1	ARS-BFGL-NGS-11433	1	2	REC	2/12	11/260	0.1282
1	ARS-BFGL-NGS-25183	2617150	1	0.4643	0.2583	2	0.02643	2.489		1	ARS-BFGL-NGS-25183	1	2	DOM	9/5	125/146	0.2721		1	ARS-BFGL-NGS-25183	1	2	REC	4/10	15/256	0.009299
1	ARS-BFGL-BAC-7317	2703664	1	0.3571	0.214	2	0.09893	2.04		1	ARS-BFGL-BAC-7317	1	2	DOM	8/6	105/166	0.2615		1	ARS-BFGL-BAC-7317	1	2	REC	2/12	11/260	0.1282
1	ARS-BFGL-NGS-29653	2769164	1	0.3571	0.3007	2	0.5314	1.292		1	ARS-BFGL-NGS-29653	1	2	DOM	8/6	138/133	0.7861		1	ARS-BFGL-NGS-29653	1	2	REC	2/12	25/246	0.63
1	BTA-120704-no-rs	2848684	1	0.1071	0.1863	2	0.45	0.524		1	BTA-120704-no-rs	1	2	DOM	3/11	92/179	0.3987		1	BTA-120704-no-rs	1	2	REC	0/14	9/262	1
1	BovineHD0100000671	2952000	2	0	0.03148	1	1	0		1	BovineHD0100000671	2	1	DOM	0/14	17/253	1		1	BovineHD0100000671	2	1	REC	0/14	0/270	1
1	BovineHD0100000681	2981856	1	0.1786	0.3407	2	0.0988	0.4206		1	BovineHD0100000681	1	2	DOM	5/9	150/120	0.1743		1	BovineHD0100000681	1	2	REC	0/14	34/236	0.3876
1	BovineHD0100000687	2996976	2	0.03571	0.1648	1	0.1053	0.1877		1	BovineHD0100000687	2	1	DOM	1/13	83/187	0.07248		1	BovineHD0100000687	2	1	REC	0/14	6/264	1
1	ARS-BFGL-NGS-115671	3033433	2	0.1071	0.3708	1	0.003945	0.2036		1	ARS-BFGL-NGS-115671	2	1	DOM	3/11	163/108	0.00523		1	ARS-BFGL-NGS-115671	2	1	REC	0/14	38/233	0.2283
1	BovineHD0100000719	3058587	1	0.1429	0.2741	2	0.187	0.4414		1	BovineHD0100000719	1	2	DOM	4/10	126/144	0.2718		1	BovineHD0100000719	1	2	REC	0/14	22/248	0.6109
1	BovineHD0100000722	3061615	1	0.1071	0.1852	2	0.4493	0.528		1	BovineHD0100000722	1	2	DOM	3/11	90/180	0.56		1	BovineHD0100000722	1	2	REC	0/14	10/260	1
1	ARS-BFGL-NGS-21352	3135408	2	0.4286	0.3764	1	0.6901	1.243		1	ARS-BFGL-NGS-21352	2	1	DOM	9/5	162/109	0.7883		1	ARS-BFGL-NGS-21352	2	1	REC	3/11	42/229	0.4697
1	BovineHD4100000021	3172295	2	0.1071	0.1741	1	0.4495	0.5694		1	BovineHD4100000021	2	1	DOM	3/11	86/184	0.5598		1	BovineHD4100000021	2	1	REC	0/14	8/262	1
1	ARS-BFGL-NGS-103391	3182687	2	0.07143	0.1458	1	0.4058	0.4508		1	ARS-BFGL-NGS-103391	2	1	DOM	2/12	71/200	0.5302		1	ARS-BFGL-NGS-103391	2	1	REC	0/14	8/263	1
1	BovineHD0100000805	3192208	1	0.4643	0.4033	2	0.5572	1.282		1	BovineHD0100000805	1	2	DOM	9/5	176/93	1		1	BovineHD0100000805	1	2	REC	4/10	41/228	0.2496
1	BovineHD0100000807	3195861	1	0.4643	0.4056	2	0.5588	1.27		1	BovineHD0100000807	1	2	DOM	9/5	177/93	1		1	BovineHD0100000807	1	2	REC	4/10	42/228	0.2541
1	ARS-BFGL-NGS-22858	3245141	2	0.07143	0.1679	1	0.2904	0.3812		1	ARS-BFGL-NGS-22858	2	1	DOM	2/12	85/186	0.2399		1	ARS-BFGL-NGS-22858	2	1	REC	0/14	6/265	1
1	BovineHD0100000837	3264758	1	0.07143	0.2127	2	0.09127	0.2848		1	BovineHD0100000837	1	2	DOM	2/12	103/165	0.08946		1	BovineHD0100000837	1	2	REC	0/14	11/257	1
1	BovineHD4100000025	3279233	2	0.03571	0.1617	1	0.1037	0.192		1	BovineHD4100000025	2	1	DOM	1/13	75/194	0.1223		1	BovineHD4100000025	2	1	REC	0/14	12/257	1
1	BovineHD0100000857	3315582	1	0.03571	0.1554	2	0.1025	0.2012		1	BovineHD0100000857	1	2	DOM	1/13	75/192	0.122		1	BovineHD0100000857	1	2	REC	0/14	8/259	1
1	BovineHD0100000861	3339918	2	0.4286	0.3265	1	0.3039	1.547		1	BovineHD0100000861	2	1	DOM	9/5	144/124	0.5847		1	BovineHD0100000861	2	1	REC	3/11	31/237	0.2306
1	BovineHD0100000876	3387354	2	0.3929	0.4335	1	0.701	0.8457		1	BovineHD0100000876	2	1	DOM	9/5	179/84	0.7738		1	BovineHD0100000876	2	1	REC	2/12	49/214	1
1	BovineHD0100000878	3389765	2	0.3929	0.4366	1	0.6997	0.8351		1	BovineHD0100000878	2	1	DOM	9/5	184/84	0.771		1	BovineHD0100000878	2	1	REC	2/12	50/218	1
1	BovineHD0100000895	3433143	1	0.4286	0.4345	2	1	0.9763		1	BovineHD0100000895	1	2	DOM	8/6	185/82	0.3795		1	BovineHD0100000895	1	2	REC	4/10	47/220	0.2923
1	ARS-BFGL-NGS-58892	3434539	1	0.4286	0.3358	2	0.3134	1.484		1	ARS-BFGL-NGS-58892	1	2	DOM	8/6	150/121	1		1	ARS-BFGL-NGS-58892	1	2	REC	4/10	32/239	0.08492
1	BovineHD0100000905	3462385	1	0.1786	0.3843	2	0.02832	0.3482		1	BovineHD0100000905	1	2	DOM	5/9	168/100	0.05187		1	BovineHD0100000905	1	2	REC	0/14	38/230	0.2285
1	ARS-BFGL-NGS-98287	3470316	2	0.07143	0.3063	1	0.005383	0.1742		1	ARS-BFGL-NGS-98287	2	1	DOM	2/12	142/129	0.005684		1	ARS-BFGL-NGS-98287	2	1	REC	0/14	24/247	0.6164
1	BTB-00001612	3492221	2	0.1071	0.131	1	1	0.7961		1	BTB-00001612	2	1	DOM	3/11	70/201	1		1	BTB-00001612	2	1	REC	0/14	1/270	1
1	BovineHD0100000930	3504642	1	0.1786	0.3848	2	0.02823	0.3476		1	BovineHD0100000930	1	2	DOM	5/9	165/104	0.08976		1	BovineHD0100000930	1	2	REC	0/14	42/227	0.2367
1	ARS-BFGL-NGS-15775	3560291	2	0	0.06642	1	0.2458	0		1	ARS-BFGL-NGS-15775	2	1	DOM	0/14	34/237	0.3871		1	ARS-BFGL-NGS-15775	2	1	REC	0/14	2/269	1
1	BovineHD0100000956	3579296	1	0	0.1343	2	0.03753	0		1	BovineHD0100000956	1	2	DOM	0/14	67/201	0.04627		1	BovineHD0100000956	1	2	REC	0/14	5/263	1
1	ARS-BFGL-NGS-59192	3599891	2	0	0.02037	1	1	0		1	ARS-BFGL-NGS-59192	2	1	DOM	0/14	11/259	1		1	ARS-BFGL-NGS-59192	2	1	REC	0/14	0/270	1
1	BovineHD0100000971	3611248	2	0.25	0.5075	1	0.01061	0.3235		1	BovineHD0100000971	2	1	DOM	7/7	205/63	0.04962		1	BovineHD0100000971	2	1	REC	0/14	67/201	0.04627
1	BovineHD0100000973	3616076	2	0.25	0.3606	1	0.3116	0.5911		1	BovineHD0100000973	2	1	DOM	7/7	167/102	0.4055		1	BovineHD0100000973	2	1	REC	0/14	27/242	0.3755
1	BTB-00001299	3653664	2	0.1429	0.238	1	0.3586	0.5336		1	BTB-00001299	2	1	DOM	4/10	115/156	0.4085		1	BTB-00001299	2	1	REC	0/14	14/257	1
1	BovineHD0100046373	3667130	1	0	0.08868	2	0.1564	0		1	BovineHD0100046373	1	2	DOM	0/14	43/222	0.1375		1	BovineHD0100046373	1	2	REC	0/14	4/261	1
1	ARS-BFGL-NGS-37412	3687775	2	0.25	0.4336	1	0.07612	0.4355		1	ARS-BFGL-NGS-37412	2	1	DOM	7/7	185/86	0.24		1	ARS-BFGL-NGS-37412	2	1	REC	0/14	50/221	0.1403
1	BovineHD0100001003	3701702	1	0.1071	0.1766	2	0.4485	0.5596		1	BovineHD0100001003	1	2	DOM	3/11	84/185	0.5613		1	BovineHD0100001003	1	2	REC	0/14	11/258	1
1	BovineHD4100000029	3704712	2	0.1429	0.2823	1	0.1303	0.4237		1	BovineHD4100000029	2	1	DOM	4/10	132/139	0.1752		1	BovineHD4100000029	2	1	REC	0/14	21/250	0.6093
1	BovineHD0100001009	3717415	2	0.75	0.4832	1	0.006364	3.208		1	BovineHD0100001009	2	1	DOM	14/0	198/70	0.0247		1	BovineHD0100001009	2	1	REC	7/7	61/207	0.04717
1	ARS-BFGL-NGS-16784	3721639	1	0	0.07749	2	0.2538	0		1	ARS-BFGL-NGS-16784	1	2	DOM	0/14	40/231	0.2307		1	ARS-BFGL-NGS-16784	1	2	REC	0/14	2/269	1
1	BTB-00001074	3826765	2	0.3929	0.4815	1	0.4391	0.6966		1	BTB-00001074	2	1	DOM	8/6	193/78	0.3658		1	BTB-00001074	2	1	REC	3/11	68/203	1
1	BovineHD0100001041	3840517	2	0.03571	0.1835	1	0.04268	0.1648		1	BovineHD0100001041	2	1	DOM	1/13	91/176	0.04062		1	BovineHD0100001041	2	1	REC	0/14	7/260	1
1	BovineHD0100001043	3849812	1	0.1071	0.21	2	0.2352	0.4513		1	BovineHD0100001043	1	2	DOM	3/11	99/170	0.3921		1	BovineHD0100001043	1	2	REC	0/14	14/255	1
1	ARS-BFGL-NGS-43924	3859505	2	0.2857	0.3247	1	0.8362	0.8318		1	ARS-BFGL-NGS-43924	2	1	DOM	8/6	145/126	1		1	ARS-BFGL-NGS-43924	2	1	REC	0/14	31/240	0.377
1	BovineHD0100001045	3861516	1	0.3571	0.2566	2	0.2698	1.61		1	BovineHD0100001045	1	2	DOM	9/5	117/150	0.1704		1	BovineHD0100001045	1	2	REC	1/13	20/247	1
1	BovineHD0100001052	3888198	1	0.1786	0.3228	2	0.1438	0.4561		1	BovineHD0100001052	1	2	DOM	5/9	142/126	0.2747		1	BovineHD0100001052	1	2	REC	0/14	31/237	0.3777
1	ARS-BFGL-NGS-30999	3908027	2	0.4286	0.4151	1	1	1.057		1	ARS-BFGL-NGS-30999	2	1	DOM	10/4	179/92	0.7791		1	ARS-BFGL-NGS-30999	2	1	REC	2/12	46/225	1
1	ARS-USMARC-Parent-DQ381153-rs29012842	3958867	2	0.4286	0.3339	1	0.3112	1.496		1	ARS-USMARC-Parent-DQ381153-rs29012842	2	1	DOM	10/4	152/119	0.2857		1	ARS-USMARC-Parent-DQ381153-rs29012842	2	1	REC	2/12	29/242	0.655
1	BovineHD0100001083	3973178	2	0.07143	0.1098	1	0.7569	0.6233		1	BovineHD0100001083	2	1	DOM	2/12	55/209	0.7418		1	BovineHD0100001083	2	1	REC	0/14	3/261	1
1	BovineHD0100001088	3989772	2	0.03571	0.08022	1	0.7151	0.4246		1	BovineHD0100001088	2	1	DOM	1/13	40/228	0.7007		1	BovineHD0100001088	2	1	REC	0/14	3/265	1
1	BovineHD0100001098	4027625	1	0.1786	0.4216	2	0.01026	0.2982		1	BovineHD0100001098	1	2	DOM	5/9	175/93	0.04181		1	BovineHD0100001098	1	2	REC	0/14	51/217	0.08145
1	ARS-BFGL-NGS-107481	4052172	2	0.4643	0.2907	1	0.0581	2.114		1	ARS-BFGL-NGS-107481	2	1	DOM	11/3	131/139	0.0514		1	ARS-BFGL-NGS-107481	2	1	REC	2/12	26/244	0.6362
1	BovineHD0100001109	4070299	2	0.07143	0.1381	1	0.4069	0.4802		1	BovineHD0100001109	2	1	DOM	2/12	68/200	0.5289		1	BovineHD0100001109	2	1	REC	0/14	6/262	1
1	BTA-31687-no-rs	4113357	2	0.4286	0.3247	1	0.3027	1.56		1	BTA-31687-no-rs	2	1	DOM	10/4	152/119	0.2857		1	BTA-31687-no-rs	2	1	REC	2/12	24/247	0.3714
1	BovineHD0100001143	4155630	1	0.4643	0.3937	2	0.5529	1.335		1	BovineHD0100001143	1	2	DOM	11/3	166/102	0.2651		1	BovineHD0100001143	1	2	REC	2/12	45/223	1
1	BTA-32603-no-rs	4168130	2	0.03571	0.06827	1	1	0.5055		1	BTA-32603-no-rs	2	1	DOM	1/13	36/235	1		1	BTA-32603-no-rs	2	1	REC	0/14	1/270	1
1	BovineHD0100001154	4181558	2	0	0.06716	1	0.2455	0		1	BovineHD0100001154	2	1	DOM	0/14	36/232	0.2284		1	BovineHD0100001154	2	1	REC	0/14	0/268	1
1	BovineHD0100001164	4224302	1	0.1786	0.2973	2	0.2061	0.5137		1	BovineHD0100001164	1	2	DOM	5/9	130/134	0.4146		1	BovineHD0100001164	1	2	REC	0/14	27/237	0.3746
1	BovineHD0100001169	4238490	1	0.4286	0.4453	2	1	0.9343		1	BovineHD0100001169	1	2	DOM	9/5	186/79	0.7655		1	BovineHD0100001169	1	2	REC	3/11	50/215	0.7339
1	ARS-BFGL-NGS-69957	4250046	1	0.4286	0.4317	2	1	0.9872		1	ARS-BFGL-NGS-69957	1	2	DOM	9/5	186/85	0.7711		1	ARS-BFGL-NGS-69957	1	2	REC	3/11	48/223	0.7216
1	BovineHD0100001174	4254712	2	0.4643	0.3472	1	0.2262	1.63		1	BovineHD0100001174	2	1	DOM	9/5	154/111	0.784		1	BovineHD0100001174	2	1	REC	4/10	30/235	0.07583
1	BovineHD0100001177	4267089	2	0.07143	0.1863	1	0.2034	0.3359		1	BovineHD0100001177	2	1	DOM	2/12	88/183	0.2382		1	BovineHD0100001177	2	1	REC	0/14	13/258	1
1	ARS-BFGL-NGS-43005	4276065	1	0.1786	0.2528	2	0.5028	0.6427		1	ARS-BFGL-NGS-43005	1	2	DOM	5/9	113/158	0.7844		1	ARS-BFGL-NGS-43005	1	2	REC	0/14	24/247	0.6164
1	Hapmap59750-rs29024375	4309205	1	0.7143	0.4871	2	0.02047	2.633		1	Hapmap59750-rs29024375	1	2	DOM	14/0	198/73	0.02433		1	Hapmap59750-rs29024375	1	2	REC	6/8	66/205	0.1259
1	BovineHD0100001215	4318690	1	0	0.04682	2	0.6284	0		1	BovineHD0100001215	1	2	DOM	0/14	25/242	0.6218		1	BovineHD0100001215	1	2	REC	0/14	0/267	1
1	BTB-00002335	4335252	1	0	0.04428	2	0.6233	0		1	BTB-00002335	1	2	DOM	0/14	24/247	0.6164		1	BTB-00002335	1	2	REC	0/14	0/271	1
1	BovineHD0100001246	4418006	2	0	0.08209	1	0.1551	0		1	BovineHD0100001246	2	1	DOM	0/14	42/226	0.2372		1	BovineHD0100001246	2	1	REC	0/14	2/266	1
1	ARS-BFGL-NGS-81011	4494007	2	0.3214	0.2638	1	0.5136	1.322		1	ARS-BFGL-NGS-81011	2	1	DOM	8/6	124/147	0.425		1	ARS-BFGL-NGS-81011	2	1	REC	1/13	19/252	1
1	BovineHD0100001276	4509506	1	0.3571	0.3937	2	0.8432	0.8557		1	BovineHD0100001276	1	2	DOM	8/6	166/102	0.7811		1	BovineHD0100001276	1	2	REC	2/12	45/223	1
1	BTB-00003162	4547357	2	0.03571	0.08487	1	0.7199	0.3994		1	BTB-00003162	2	1	DOM	1/13	44/227	0.7049		1	BTB-00003162	2	1	REC	0/14	2/269	1
1	BTB-00002966	4615149	2	0.4286	0.2934	1	0.1408	1.807		1	BTB-00002966	2	1	DOM	9/5	134/137	0.4121		1	BTB-00002966	2	1	REC	3/11	25/246	0.1479
1	BTA-34568-no-rs	4729973	2	0.3571	0.3007	1	0.5314	1.292		1	BTA-34568-no-rs	2	1	DOM	8/6	137/134	0.7857		1	BTA-34568-no-rs	2	1	REC	2/12	26/245	0.6357
1	Hapmap42913-BTA-33619	4752971	1	0.3929	0.4483	2	0.6974	0.7962		1	Hapmap42913-BTA-33619	1	2	DOM	9/5	186/85	0.7711		1	Hapmap42913-BTA-33619	1	2	REC	2/12	57/214	0.7417
1	BovineHD0100001370	4781618	2	0.3929	0.4659	1	0.5605	0.7418		1	BovineHD0100001370	2	1	DOM	9/5	185/79	0.7658		1	BovineHD0100001370	2	1	REC	2/12	61/203	0.743
1	BTB-00002687	4804971	1	0	0.05926	2	0.3935	0		1	BTB-00002687	1	2	DOM	0/14	32/238	0.3799		1	BTB-00002687	1	2	REC	0/14	0/270	1
1	BovineHD0100001385	4856702	2	0	0.05576	1	0.3892	0		1	BovineHD0100001385	2	1	DOM	0/14	28/241	0.3745		1	BovineHD0100001385	2	1	REC	0/14	2/267	1
1	BovineHD0100001392	4882775	2	0	0.03321	1	1	0		1	BovineHD0100001392	2	1	DOM	0/14	18/253	1		1	BovineHD0100001392	2	1	REC	0/14	0/271	1
1	BovineHD0100001394	4890114	2	0	0.03731	1	0.6158	0		1	BovineHD0100001394	2	1	DOM	0/14	20/248	0.6086		1	BovineHD0100001394	2	1	REC	0/14	0/268	1
1	BTB-01747944	4982601	1	0.03571	0.03875	2	1	0.9189		1	BTB-01747944	1	2	DOM	1/13	21/250	1		1	BTB-01747944	1	2	REC	0/14	0/271	1
1	BovineHD0100001409	4986559	2	0.4643	0.4291	1	0.8452	1.153		1	BovineHD0100001409	2	1	DOM	9/5	179/89	1		1	BovineHD0100001409	2	1	REC	4/10	51/217	0.4853
1	BTB-01991572	4991120	2	0.03571	0.03333	1	1	1.074		1	BTB-01991572	2	1	DOM	1/13	18/252	1		1	BTB-01991572	2	1	REC	0/14	0/270	1
1	BovineHD0100001411	4991864	1	0.4643	0.4244	2	0.6988	1.176		1	BovineHD0100001411	1	2	DOM	9/5	179/92	1		1	BovineHD0100001411	1	2	REC	4/10	51/220	0.4837
1	BTB-02105769	5012080	1	0.4643	0.4557	2	1	1.035		1	BTB-02105769	1	2	DOM	9/5	191/80	0.765		1	BTB-02105769	1	2	REC	4/10	56/215	0.5027
1	BovineHD0100001418	5037720	2	0	0.05037	1	0.3885	0		1	BovineHD0100001418	2	1	DOM	0/14	27/241	0.3753		1	BovineHD0100001418	2	1	REC	0/14	0/268	1
1	ARS-BFGL-NGS-65157	5044963	1	0.3929	0.2749	2	0.1965	1.707		1	ARS-BFGL-NGS-65157	1	2	DOM	8/6	127/144	0.5853		1	ARS-BFGL-NGS-65157	1	2	REC	3/11	22/249	0.1136
1	BovineHD0100001424	5058523	2	0.4643	0.4244	1	0.6988	1.176		1	BovineHD0100001424	2	1	DOM	9/5	182/89	0.7791		1	BovineHD0100001424	2	1	REC	4/10	48/223	0.2947
1	BovineHD0100001438	5087212	2	0.4286	0.3899	1	0.6951	1.173		1	BovineHD0100001438	2	1	DOM	9/5	174/94	1		1	BovineHD0100001438	2	1	REC	3/11	35/233	0.4131
1	BovineHD0100001441	5099108	1	0.3929	0.3078	2	0.4027	1.455		1	BovineHD0100001441	1	2	DOM	8/6	138/130	0.7871		1	BovineHD0100001441	1	2	REC	3/11	27/241	0.1766
1	BTB-01996267	5147933	1	0	0.0941	2	0.1624	0		1	BTB-01996267	1	2	DOM	0/14	49/222	0.1386		1	BTB-01996267	1	2	REC	0/14	2/269	1
1	Hapmap38555-BTA-101264	5338825	2	0.3214	0.1937	1	0.1414	1.971		1	Hapmap38555-BTA-101264	2	1	DOM	8/6	93/178	0.09225		1	Hapmap38555-BTA-101264	2	1	REC	1/13	12/259	0.488
1	BovineHD0100001507	5372683	1	0.3929	0.3643	2	0.841	1.129		1	BovineHD0100001507	1	2	DOM	8/6	160/109	1		1	BovineHD0100001507	1	2	REC	3/11	36/233	0.4196
1	BTB-01160486	5384710	1	0.3214	0.19	2	0.09229	2.019		1	BTB-01160486	1	2	DOM	8/6	91/180	0.08651		1	BTB-01160486	1	2	REC	1/13	12/259	0.488
1	Hapmap60540-rs29021339	5462172	2	0.2143	0.3007	1	0.4004	0.6341		1	Hapmap60540-rs29021339	2	1	DOM	6/8	137/134	0.5973		1	Hapmap60540-rs29021339	2	1	REC	0/14	26/245	0.6249
1	BovineHD0100001535	5475277	2	0.03571	0.1685	1	0.06667	0.1827		1	BovineHD0100001535	2	1	DOM	1/13	82/185	0.07249		1	BovineHD0100001535	2	1	REC	0/14	8/259	1
1	BovineHD0100001536	5482005	1	0.4643	0.4944	2	0.8471	0.8864		1	BovineHD0100001536	1	2	DOM	9/5	203/64	0.3428		1	BovineHD0100001536	1	2	REC	4/10	61/206	0.7446
1	Hapmap60652-rs29022048	5519231	2	0.2143	0.3413	1	0.2182	0.5263		1	Hapmap60652-rs29022048	2	1	DOM	6/8	155/116	0.408		1	Hapmap60652-rs29022048	2	1	REC	0/14	30/241	0.3753
1	BTB-01160178	5562248	1	0	0.1273	2	0.03751	0		1	BTB-01160178	1	2	DOM	0/14	66/205	0.04529		1	BTB-01160178	1	2	REC	0/14	3/268	1
1	BovineHD0100001579	5569070	1	0	0.161	2	0.01361	0		1	BovineHD0100001579	1	2	DOM	0/14	79/185	0.01263		1	BovineHD0100001579	1	2	REC	0/14	6/258	1
1	BovineHD0100001591	5612484	2	0.3929	0.3116	1	0.4055	1.43		1	BovineHD0100001591	2	1	DOM	9/5	144/124	0.5847		1	BovineHD0100001591	2	1	REC	2/12	23/245	0.3575
1	Hapmap43435-BTA-101251	5615120	2	0.3214	0.214	1	0.2384	1.74		1	Hapmap43435-BTA-101251	2	1	DOM	8/6	104/167	0.1723		1	Hapmap43435-BTA-101251	2	1	REC	1/13	12/259	0.488
1	BovineHD0100001596	5629126	1	0.25	0.4049	2	0.1158	0.49		1	BovineHD0100001596	1	2	DOM	7/7	170/98	0.3963		1	BovineHD0100001596	1	2	REC	0/14	47/221	0.1368
1	ARS-BFGL-NGS-111125	5644654	2	0.07143	0.0738	1	1	0.9654		1	ARS-BFGL-NGS-111125	2	1	DOM	2/12	38/233	1		1	ARS-BFGL-NGS-111125	2	1	REC	0/14	2/269	1
1	BovineHD0100001610	5657951	1	0	0.03545	2	0.616	0		1	BovineHD0100001610	1	2	DOM	0/14	19/249	0.6088		1	BovineHD0100001610	1	2	REC	0/14	0/268	1
1	BTB-01160026	5668141	1	0.2857	0.3967	2	0.3211	0.6084		1	BTB-01160026	1	2	DOM	8/6	168/103	0.7809		1	BTB-01160026	1	2	REC	0/14	47/224	0.1367
1	BTB-01159977	5692100	1	0	0.03333	2	1	0		1	BTB-01159977	1	2	DOM	0/14	18/252	1		1	BTB-01159977	1	2	REC	0/14	0/270	1
1	BTB-01159966	5720949	2	0	0.02952	1	1	0		1	BTB-01159966	2	1	DOM	0/14	16/255	1		1	BTB-01159966	2	1	REC	0/14	0/271	1
1	BovineHD0100001629	5730545	2	0.03571	0.09888	1	0.5046	0.3375		1	BovineHD0100001629	2	1	DOM	1/13	48/220	0.4764		1	BovineHD0100001629	2	1	REC	0/14	5/263	1
1	BovineHD0100001633	5744744	1	0.3214	0.3787	2	0.6897	0.777		1	BovineHD0100001633	1	2	DOM	9/5	158/110	0.7858		1	BovineHD0100001633	1	2	REC	0/14	45/223	0.1364
1	Hapmap44178-BTA-101248	5745330	2	0	0.04613	1	0.627	0		1	Hapmap44178-BTA-101248	2	1	DOM	0/14	25/246	0.6204		1	Hapmap44178-BTA-101248	2	1	REC	0/14	0/271	1
1	BovineHD0100001637	5749728	2	0.3571	0.4777	1	0.247	0.6074		1	BovineHD0100001637	2	1	DOM	8/6	201/68	0.2075		1	BovineHD0100001637	2	1	REC	2/12	56/213	0.742
1	ARS-BFGL-NGS-114983	5768796	2	0.3571	0.3708	1	1	0.9425		1	ARS-BFGL-NGS-114983	2	1	DOM	9/5	165/106	1		1	ARS-BFGL-NGS-114983	2	1	REC	1/13	36/235	1
1	BovineHD0100001660	5803981	1	0.3571	0.4496	2	0.436	0.68		1	BovineHD0100001660	1	2	DOM	9/5	185/83	0.7694		1	BovineHD0100001660	1	2	REC	1/13	56/212	0.3144
1	BovineHD0100001664	5822399	2	0.3571	0.2108	1	0.09635	2.08		1	BovineHD0100001664	2	1	DOM	9/5	102/166	0.0885		1	BovineHD0100001664	2	1	REC	1/13	11/257	0.464
1	BovineHD0100001667	5834595	1	0.3571	0.291	2	0.5235	1.353		1	BovineHD0100001667	1	2	DOM	9/5	135/133	0.4135		1	BovineHD0100001667	1	2	REC	1/13	21/247	1
1	BovineHD0100001678	5871590	1	0.2143	0.3647	2	0.1551	0.4752		1	BovineHD0100001678	1	2	DOM	6/8	151/115	0.4089		1	BovineHD0100001678	1	2	REC	0/14	43/223	0.1377
1	BovineHD0100001688	5901795	2	0.1786	0.1556	1	0.7888	1.18		1	BovineHD0100001688	2	1	DOM	5/9	78/192	0.559		1	BovineHD0100001688	2	1	REC	0/14	6/264	1
1	BTB-01728863	5909634	1	0.2857	0.3284	2	0.8365	0.818		1	BTB-01728863	1	2	DOM	8/6	145/126	1		1	BTB-01728863	1	2	REC	0/14	33/238	0.383
1	BTB-00003983	5945833	1	0.3214	0.1815	2	0.0805	2.136		1	BTB-00003983	1	2	DOM	8/6	88/182	0.08025		1	BTB-00003983	1	2	REC	1/13	10/260	0.4324
1	BovineHD0100001699	5948205	1	0.5357	0.4777	2	0.5669	1.262		1	BovineHD0100001699	1	2	DOM	12/2	191/78	0.3627		1	BovineHD0100001699	1	2	REC	3/11	66/203	1
1	BovineHD4100000041	5968632	1	0.4286	0.3246	2	0.3025	1.56		1	BovineHD4100000041	1	2	DOM	8/6	147/121	1		1	BovineHD4100000041	1	2	REC	4/10	27/241	0.05456
1	BovineHD0100001705	5979118	1	0.1429	0.416	2	0.004743	0.2339		1	BovineHD0100001705	1	2	DOM	4/10	178/90	0.007368		1	BovineHD0100001705	1	2	REC	0/14	45/223	0.1364
1	ARS-BFGL-NGS-100349	5985024	2	0.3214	0.1753	1	0.07413	2.229		1	ARS-BFGL-NGS-100349	2	1	DOM	8/6	84/187	0.07359		1	ARS-BFGL-NGS-100349	2	1	REC	1/13	11/260	0.4603
1	BovineHD0100001716	5991427	2	0.4286	0.4554	1	0.8473	0.8969		1	BovineHD0100001716	2	1	DOM	9/5	192/77	0.5559		1	BovineHD0100001716	2	1	REC	3/11	53/216	1
1	BTA-122021-no-rs	6038527	2	0.1071	0.1863	1	0.45	0.524		1	BTA-122021-no-rs	2	1	DOM	3/11	90/181	0.5598		1	BTA-122021-no-rs	2	1	REC	0/14	11/260	1
1	BTB-00003770	6062518	2	0.1071	0.262	1	0.07571	0.338		1	BTB-00003770	2	1	DOM	3/11	121/150	0.103		1	BTB-00003770	2	1	REC	0/14	21/250	0.6093
1	BTB-00003715	6092662	2	0.1071	0.2638	1	0.0754	0.3348		1	BTB-00003715	2	1	DOM	3/11	122/149	0.1013		1	BTB-00003715	2	1	REC	0/14	21/250	0.6093
1	BovineHD0100001759	6133181	2	0.3929	0.3086	1	0.4032	1.45		1	BovineHD0100001759	2	1	DOM	9/5	141/128	0.4244		1	BovineHD0100001759	2	1	REC	2/12	25/244	0.631
1	BovineHD0100001769	6154670	1	0.1429	0.2185	2	0.4795	0.596		1	BovineHD0100001769	1	2	DOM	4/10	107/163	0.5764		1	BovineHD0100001769	1	2	REC	0/14	11/259	1
1	Hapmap38892-BTA-36614	6160986	2	0.1071	0.07011	1	0.4439	1.592		1	Hapmap38892-BTA-36614	2	1	DOM	3/11	38/233	0.4334		1	Hapmap38892-BTA-36614	2	1	REC	0/14	0/271	1
1	BTB-00003652	6184195	2	0.03571	0.1125	1	0.3465	0.292		1	BTB-00003652	2	1	DOM	1/13	59/212	0.3141		1	BTB-00003652	2	1	REC	0/14	2/269	1
1	BTA-120711-no-rs	6205654	1	0.4286	0.2934	2	0.1408	1.807		1	BTA-120711-no-rs	1	2	DOM	10/4	141/130	0.1798		1	BTA-120711-no-rs	1	2	REC	2/12	18/253	0.2565
1	BovineHD0100001788	6213780	1	0.4286	0.444	2	1	0.9391		1	BovineHD0100001788	1	2	DOM	8/6	192/76	0.2421		1	BovineHD0100001788	1	2	REC	4/10	46/222	0.283
1	BovineHD0100001805	6251669	2	0.03571	0.09294	1	0.4995	0.3615		1	BovineHD0100001805	2	1	DOM	1/13	47/222	0.477		1	BovineHD0100001805	2	1	REC	0/14	3/266	1
1	BTA-35637-no-rs	6274384	2	0.4643	0.4834	1	1	0.9262		1	BTA-35637-no-rs	2	1	DOM	10/4	201/70	0.7623		1	BTA-35637-no-rs	2	1	REC	3/11	61/210	1
1	ARS-BFGL-NGS-115182	6313376	1	0.4643	0.3284	2	0.1527	1.772		1	ARS-BFGL-NGS-115182	1	2	DOM	11/3	145/126	0.09681		1	ARS-BFGL-NGS-115182	1	2	REC	2/12	33/238	0.6847
1	BovineHD0100001854	6366473	1	0.4286	0.3266	2	0.304	1.547		1	BovineHD0100001854	1	2	DOM	10/4	146/125	0.273		1	BovineHD0100001854	1	2	REC	2/12	31/240	0.6695
1	BTA-35598-no-rs	6375330	2	0	0.02583	1	1	0		1	BTA-35598-no-rs	2	1	DOM	0/14	14/257	1		1	BTA-35598-no-rs	2	1	REC	0/14	0/271	1
1	BovineHD0100001857	6384709	2	0.4286	0.2926	1	0.14	1.813		1	BovineHD0100001857	2	1	DOM	10/4	129/141	0.1033		1	BovineHD0100001857	2	1	REC	2/12	29/241	0.6558
1	BovineHD0100001865	6403787	2	0.4286	0.317	1	0.2199	1.616		1	BovineHD0100001865	2	1	DOM	10/4	138/127	0.18		1	BovineHD0100001865	2	1	REC	2/12	30/235	0.6671
1	Hapmap58931-rs29010773	6404933	2	0.1071	0.0738	1	0.4601	1.506		1	Hapmap58931-rs29010773	2	1	DOM	3/11	40/231	0.4509		1	Hapmap58931-rs29010773	2	1	REC	0/14	0/271	1
1	BovineHD0100001869	6415835	1	0.4286	0.2714	2	0.08383	2.014		1	BovineHD0100001869	1	2	DOM	10/4	122/147	0.09612		1	BovineHD0100001869	1	2	REC	2/12	24/245	0.3749
1	BTA-15152-rs29026517	6440092	2	0	0.04797	1	0.6313	0		1	BTA-15152-rs29026517	2	1	DOM	0/14	26/245	0.6249		1	BTA-15152-rs29026517	2	1	REC	0/14	0/271	1
1	BovineHD0100001883	6449771	2	0.1071	0.07736	1	0.4769	1.431		1	BovineHD0100001883	2	1	DOM	3/11	41/224	0.469		1	BovineHD0100001883	2	1	REC	0/14	0/265	1
1	BovineHD0100001895	6482306	1	0.3214	0.2249	2	0.2506	1.632		1	BovineHD0100001895	1	2	DOM	7/7	106/163	0.577		1	BovineHD0100001895	1	2	REC	2/12	15/254	0.2019
1	BovineHD0100001899	6498668	1	0.4643	0.3234	2	0.1487	1.813		1	BovineHD0100001899	1	2	DOM	11/3	145/124	0.09759		1	BovineHD0100001899	1	2	REC	2/12	29/240	0.6565
1	BovineHD0100001914	6539650	2	0	0.03903	1	0.6165	0		1	BovineHD0100001914	2	1	DOM	0/14	21/248	0.6094		1	BovineHD0100001914	2	1	REC	0/14	0/269	1
1	Hapmap36132-SCAFFOLD45728_8109	6568614	1	0.3571	0.363	2	1	0.9751		1	Hapmap36132-SCAFFOLD45728_8109	1	2	DOM	8/6	167/103	0.7814		1	Hapmap36132-SCAFFOLD45728_8109	1	2	REC	2/12	29/241	0.6558
1	ARS-BFGL-NGS-113844	6598700	1	0.1786	0.2122	2	0.8145	0.8072		1	ARS-BFGL-NGS-113844	1	2	DOM	5/9	101/170	1		1	ARS-BFGL-NGS-113844	1	2	REC	0/14	14/257	1
1	BTB-01489336	6656130	2	0.07143	0.1255	1	0.56	0.5362		1	BTB-01489336	2	1	DOM	2/12	64/207	0.5333		1	BTB-01489336	2	1	REC	0/14	4/267	1
1	BovineHD0100001962	6659142	2	0.1071	0.1734	1	0.4499	0.5719		1	BovineHD0100001962	2	1	DOM	3/11	84/187	0.5621		1	BovineHD0100001962	2	1	REC	0/14	10/261	1
1	ARS-BFGL-NGS-115389	6683341	1	0.1429	0.2749	2	0.1873	0.4396		1	ARS-BFGL-NGS-115389	1	2	DOM	4/10	126/145	0.2721		1	ARS-BFGL-NGS-115389	1	2	REC	0/14	23/248	0.6132
1	BovineHD0100001976	6712326	2	0.1071	0.213	1	0.2345	0.4435		1	BovineHD0100001976	2	1	DOM	3/11	101/169	0.269		1	BovineHD0100001976	2	1	REC	0/14	14/256	1
1	BovineHD0100001978	6722062	2	0	0.08614	1	0.1552	0		1	BovineHD0100001978	2	1	DOM	0/14	45/222	0.1363		1	BovineHD0100001978	2	1	REC	0/14	1/266	1
1	BTB-01489466	6740664	1	0.1786	0.3007	2	0.2049	0.5055		1	BTB-01489466	1	2	DOM	5/9	133/138	0.4155		1	BTB-01489466	1	2	REC	0/14	30/241	0.3753
1	BovineHD0100001991	6781489	1	0.4286	0.4777	2	0.6996	0.82		1	BovineHD0100001991	1	2	DOM	11/3	190/79	0.7637		1	BovineHD0100001991	1	2	REC	1/13	67/202	0.1996
1	BovineHD0100001996	6796330	2	0.03571	0.09444	1	0.5004	0.3551		1	BovineHD0100001996	2	1	DOM	1/13	48/222	0.4765		1	BovineHD0100001996	2	1	REC	0/14	3/267	1
1	BovineHD0100002000	6812013	2	0.3929	0.3504	1	0.6867	1.2		1	BovineHD0100002000	2	1	DOM	9/5	146/118	0.5893		1	BovineHD0100002000	2	1	REC	2/12	39/225	1
1	Hapmap56173-ss46526166	6813154	1	0.4643	0.4815	2	1	0.9331		1	Hapmap56173-ss46526166	1	2	DOM	8/6	204/67	0.2041		1	Hapmap56173-ss46526166	1	2	REC	5/9	57/214	0.1945
1	BovineHD0100002001	6813575	2	0.3571	0.277	1	0.3895	1.45		1	BovineHD0100002001	2	1	DOM	9/5	126/143	0.274		1	BovineHD0100002001	2	1	REC	1/13	23/246	1
1	Hapmap51901-BTA-42438	6844784	1	0.4643	0.4815	2	1	0.9331		1	Hapmap51901-BTA-42438	1	2	DOM	8/6	204/67	0.2041		1	Hapmap51901-BTA-42438	1	2	REC	5/9	57/214	0.1945
1	BovineHD0100002023	6893254	1	0.1429	0.1654	2	1	0.8408		1	BovineHD0100002023	1	2	DOM	4/10	80/189	1		1	BovineHD0100002023	1	2	REC	0/14	9/260	1
1	BTA-43315-no-rs	6910759	2	0.4643	0.4889	1	0.8481	0.9059		1	BTA-43315-no-rs	2	1	DOM	8/6	205/66	0.1259		1	BTA-43315-no-rs	2	1	REC	5/9	60/211	0.3228
1	BovineHD0100002036	6925674	2	0.07143	0.2094	1	0.09129	0.2904		1	BovineHD0100002036	2	1	DOM	2/12	100/165	0.09153		1	BovineHD0100002036	2	1	REC	0/14	11/254	1
1	ARS-BFGL-NGS-109057	6963461	2	0.4286	0.4557	1	0.8472	0.8957		1	ARS-BFGL-NGS-109057	2	1	DOM	9/5	190/81	0.7658		1	ARS-BFGL-NGS-109057	2	1	REC	3/11	57/214	1
1	BovineHD0100002068	7002644	1	0.07143	0.2148	2	0.09157	0.2812		1	BovineHD0100002068	1	2	DOM	2/12	103/167	0.09024		1	BovineHD0100002068	1	2	REC	0/14	13/257	1
1	ARS-BFGL-NGS-41525	7022169	2	0.4643	0.4926	1	0.8474	0.8926		1	ARS-BFGL-NGS-41525	2	1	DOM	8/6	206/65	0.1208		1	ARS-BFGL-NGS-41525	2	1	REC	5/9	61/210	0.3259
1	BovineHD0100002084	7036520	2	0.2857	0.3741	1	0.4243	0.6693		1	BovineHD0100002084	2	1	DOM	8/6	160/110	1		1	BovineHD0100002084	2	1	REC	0/14	42/228	0.2362
1	BovineHD0100002101	7059775	2	0	0.05682	1	0.3899	0		1	BovineHD0100002101	2	1	DOM	0/14	30/234	0.3762		1	BovineHD0100002101	2	1	REC	0/14	0/264	1
1	Hapmap34831-BES10_Contig712_1090	7071121	2	0.07143	0.1384	1	0.4069	0.479		1	Hapmap34831-BES10_Contig712_1090	2	1	DOM	2/12	73/198	0.3688		1	Hapmap34831-BES10_Contig712_1090	2	1	REC	0/14	2/269	1
1	BovineHD0100002124	7144946	1	0.3214	0.2313	2	0.2615	1.574		1	BovineHD0100002124	1	2	DOM	7/7	107/161	0.5781		1	BovineHD0100002124	1	2	REC	2/12	17/251	0.2412
1	BovineHD0100002127	7159731	2	0.4286	0.454	1	0.8474	0.9019		1	BovineHD0100002127	2	1	DOM	8/6	189/72	0.2311		1	BovineHD0100002127	2	1	REC	4/10	48/213	0.3105
1	BTA-44295-no-rs	7164618	1	0.3214	0.2185	2	0.2425	1.694		1	BTA-44295-no-rs	1	2	DOM	7/7	104/166	0.4111		1	BTA-44295-no-rs	1	2	REC	2/12	14/256	0.1822
1	BTA-44308-no-rs	7202401	2	0.1071	0.2193	1	0.2351	0.4271		1	BTA-44308-no-rs	2	1	DOM	3/11	108/161	0.2608		1	BTA-44308-no-rs	2	1	REC	0/14	10/259	1
1	BTA-45181-no-rs	7260253	2	0.4286	0.4483	1	1	0.9228		1	BTA-45181-no-rs	2	1	DOM	10/4	187/84	1		1	BTA-45181-no-rs	2	1	REC	2/12	56/215	0.7423
1	ARS-BFGL-NGS-11803	7280774	2	0.07143	0.2066	1	0.09197	0.2953		1	ARS-BFGL-NGS-11803	2	1	DOM	2/12	95/176	0.1501		1	ARS-BFGL-NGS-11803	2	1	REC	0/14	17/254	1
1	BTA-45221-no-rs	7311182	2	0.1786	0.4779	1	0.001696	0.2375		1	BTA-45221-no-rs	2	1	DOM	5/9	200/71	0.004136		1	BTA-45221-no-rs	2	1	REC	0/14	59/212	0.08227
1	BovineHD0100002179	7333147	2	0.07143	0.2659	1	0.0241	0.2124		1	BovineHD0100002179	2	1	DOM	2/12	119/148	0.02781		1	BovineHD0100002179	2	1	REC	0/14	23/244	0.6141
1	BovineHD0100002183	7354808	2	0.1071	0.2243	1	0.1659	0.4149		1	BovineHD0100002183	2	1	DOM	3/11	108/155	0.1712		1	BovineHD0100002183	2	1	REC	0/14	10/253	1
1	BovineHD0100002202	7412933	2	0.5357	0.4487	1	0.4371	1.418		1	BovineHD0100002202	2	1	DOM	12/2	179/84	0.2382		1	BovineHD0100002202	2	1	REC	3/11	57/206	1
1	BovineHD4100000049	7419499	2	0.4286	0.2509	1	0.04614	2.239		1	BovineHD4100000049	2	1	DOM	10/4	117/152	0.05325		1	BovineHD4100000049	2	1	REC	2/12	18/251	0.2592
1	Hapmap39203-BTA-46163	7424552	2	0.1071	0.04428	1	0.1407	2.59		1	Hapmap39203-BTA-46163	2	1	DOM	3/11	24/247	0.1361		1	Hapmap39203-BTA-46163	2	1	REC	0/14	0/271	1
1	AX-18028228	7429447	2	0.1429	0.3222	1	0.05838	0.3506		1	AX-18028228	2	1	DOM	4/10	146/124	0.09691		1	AX-18028228	2	1	REC	0/14	28/242	0.3746
1	ARS-BFGL-NGS-96381	7449333	2	0.4286	0.4944	1	0.5634	0.767		1	ARS-BFGL-NGS-96381	2	1	DOM	9/5	199/68	0.3664		1	ARS-BFGL-NGS-96381	2	1	REC	3/11	65/202	1
1	BTA-46228-no-rs	7484829	1	0.1786	0.2122	2	0.8145	0.8072		1	BTA-46228-no-rs	1	2	DOM	5/9	99/172	1		1	BTA-46228-no-rs	1	2	REC	0/14	16/255	1
1	BovineHD0100002252	7519177	1	0.4643	0.4849	2	0.849	0.9206		1	BovineHD0100002252	1	2	DOM	11/3	189/76	0.7634		1	BovineHD0100002252	1	2	REC	2/12	68/197	0.5289
1	BovineHD0100002277	7568080	1	0.4643	0.4065	2	0.5593	1.265		1	BovineHD0100002277	1	2	DOM	11/3	173/89	0.3983		1	BovineHD0100002277	1	2	REC	2/12	40/222	1
1	BTA-47159-no-rs	7569903	1	0.07143	0.1402	2	0.4061	0.4717		1	BTA-47159-no-rs	1	2	DOM	2/12	74/197	0.3667		1	BTA-47159-no-rs	1	2	REC	0/14	2/269	1
1	BovineHD0100002282	7575218	2	0.4286	0.4305	1	1	0.9924		1	BovineHD0100002282	2	1	DOM	11/3	177/89	0.5601		1	BovineHD0100002282	2	1	REC	1/13	52/214	0.4809
1	BTA-16441-no-rs	7616380	2	0.3571	0.2862	1	0.4013	1.385		1	BTA-16441-no-rs	2	1	DOM	9/5	132/137	0.2885		1	BTA-16441-no-rs	2	1	REC	1/13	22/247	1
1	BovineHD0100002347	7788418	1	0.4643	0.3859	2	0.4308	1.379		1	BovineHD0100002347	1	2	DOM	10/4	171/92	0.7769		1	BovineHD0100002347	1	2	REC	3/11	32/231	0.3973
1	ARS-BFGL-NGS-38621	7808598	2	0.4286	0.3063	1	0.209	1.699		1	ARS-BFGL-NGS-38621	2	1	DOM	10/4	146/125	0.273		1	ARS-BFGL-NGS-38621	2	1	REC	2/12	20/251	0.2949
1	BovineHD0100002376	7890249	1	0.5	0.4833	2	1	1.069		1	BovineHD0100002376	1	2	DOM	12/2	197/72	0.5321		1	BovineHD0100002376	1	2	REC	2/12	63/206	0.7441
1	Hapmap44081-BTA-48210	7893442	2	0.1071	0.03506	1	0.08727	3.303		1	Hapmap44081-BTA-48210	2	1	DOM	3/11	19/252	0.08325		1	Hapmap44081-BTA-48210	2	1	REC	0/14	0/271	1
1	BovineHD0100002384	7920464	2	0.5	0.4908	1	1	1.038		1	BovineHD0100002384	2	1	DOM	12/2	196/75	0.365		1	BovineHD0100002384	2	1	REC	2/12	70/201	0.5294
1	ARS-BFGL-NGS-114174	7939960	2	0.5	0.4907	1	1	1.038		1	ARS-BFGL-NGS-114174	2	1	DOM	12/2	195/74	0.3656		1	ARS-BFGL-NGS-114174	2	1	REC	2/12	69/200	0.5291
1	BovineHD0100002396	7964687	2	0.1429	0.1338	1	0.7808	1.079		1	BovineHD0100002396	2	1	DOM	4/10	69/200	0.7609		1	BovineHD0100002396	2	1	REC	0/14	3/266	1
1	BTA-48234-no-rs	7966238	2	0.1429	0.1089	1	0.5365	1.364		1	BTA-48234-no-rs	2	1	DOM	4/10	57/214	0.5077		1	BTA-48234-no-rs	2	1	REC	0/14	2/269	1
1	BTA-29644-no-rs	8000850	1	0.5	0.476	2	0.8479	1.101		1	BTA-29644-no-rs	1	2	DOM	10/4	192/79	1		1	BTA-29644-no-rs	1	2	REC	4/10	66/205	0.752
1	Hapmap48967-BTA-97940	8075890	1	0.3929	0.3801	2	1	1.055		1	Hapmap48967-BTA-97940	1	2	DOM	8/6	167/104	0.7822		1	Hapmap48967-BTA-97940	1	2	REC	3/11	39/232	0.442
1	BovineHD0100002423	8100141	1	0.5	0.464	2	0.8463	1.155		1	BovineHD0100002423	1	2	DOM	11/3	184/80	0.5652		1	BovineHD0100002423	1	2	REC	3/11	61/203	1
1	BTB-01493780	8122464	1	0.03571	0.1402	2	0.156	0.2271		1	BTB-01493780	1	2	DOM	1/13	72/199	0.1262		1	BTB-01493780	1	2	REC	0/14	4/267	1
1	BovineHD0100002437	8161528	2	0.07143	0.2156	1	0.09144	0.2798		1	BovineHD0100002437	2	1	DOM	2/12	98/164	0.09281		1	BovineHD0100002437	2	1	REC	0/14	15/247	1
1	BovineHD0100002440	8182783	2	0.4643	0.2992	1	0.09049	2.03		1	BovineHD0100002440	2	1	DOM	11/3	125/139	0.02792		1	BovineHD0100002440	2	1	REC	2/12	33/231	0.6916
1	Hapmap48369-BTA-50306	8219111	1	0.3929	0.3321	2	0.5403	1.301		1	Hapmap48369-BTA-50306	1	2	DOM	9/5	151/120	0.5915		1	Hapmap48369-BTA-50306	1	2	REC	2/12	29/242	0.655
1	BovineHD0100002449	8226256	2	0.4286	0.383	1	0.6917	1.208		1	BovineHD0100002449	2	1	DOM	10/4	167/98	0.5846		1	BovineHD0100002449	2	1	REC	2/12	36/229	1
1	BovineHD0100002458	8274037	2	0.5714	0.481	1	0.4385	1.439		1	BovineHD0100002458	2	1	DOM	12/2	198/65	0.5292		1	BovineHD0100002458	2	1	REC	4/10	55/208	0.5059
1	Hapmap41255-BTA-40460	8298027	2	0.3929	0.3838	1	1	1.039		1	Hapmap41255-BTA-40460	2	1	DOM	10/4	168/103	0.5797		1	Hapmap41255-BTA-40460	2	1	REC	1/13	40/231	0.7006
1	BTA-114657-no-rs	8320562	1	0.1071	0.07593	2	0.47	1.46		1	BTA-114657-no-rs	1	2	DOM	3/11	41/229	0.4616		1	BTA-114657-no-rs	1	2	REC	0/14	0/270	1
1	BovineHD0100002480	8329113	1	0.3929	0.3864	2	1	1.028		1	BovineHD0100002480	1	2	DOM	10/4	165/99	0.5817		1	BovineHD0100002480	1	2	REC	1/13	39/225	0.7004
1	ARS-BFGL-NGS-116504	8347260	2	0.4643	0.428	1	0.7009	1.158		1	ARS-BFGL-NGS-116504	2	1	DOM	9/5	185/86	0.7729		1	ARS-BFGL-NGS-116504	2	1	REC	4/10	47/224	0.2867
1	BTA-114662-no-rs	8374638	2	0.07143	0.1978	1	0.1368	0.312		1	BTA-114662-no-rs	2	1	DOM	2/12	98/170	0.1491		1	BTA-114662-no-rs	2	1	REC	0/14	8/260	1
1	ARS-BFGL-NGS-105113	8534534	2	0.25	0.5093	1	0.01056	0.3212		1	ARS-BFGL-NGS-105113	2	1	DOM	7/7	210/60	0.0251		1	ARS-BFGL-NGS-105113	2	1	REC	0/14	65/205	0.04501
1	BovineHD0100002528	8548471	1	0.3929	0.2547	2	0.1223	1.894		1	BovineHD0100002528	1	2	DOM	10/4	116/151	0.05308		1	BovineHD0100002528	1	2	REC	1/13	20/247	1
1	BovineHD0100002539	8607680	1	0.25	0.3845	2	0.1674	0.5337		1	BovineHD0100002539	1	2	DOM	7/7	168/96	0.3952		1	BovineHD0100002539	1	2	REC	0/14	35/229	0.2287
1	ARS-BFGL-NGS-44292	8645661	2	0.3571	0.369	1	1	0.95		1	ARS-BFGL-NGS-44292	2	1	DOM	9/5	160/111	0.786		1	ARS-BFGL-NGS-44292	2	1	REC	1/13	40/231	0.7006
1	BovineHD0100002563	8685545	2	0.25	0.3938	1	0.1634	0.5131		1	BovineHD0100002563	2	1	DOM	7/7	166/93	0.3932		1	BovineHD0100002563	2	1	REC	0/14	38/221	0.2296
1	BovineHD0100002572	8717011	1	0.4643	0.417	2	0.6958	1.212		1	BovineHD0100002572	1	2	DOM	9/5	180/91	1		1	BovineHD0100002572	1	2	REC	4/10	46/225	0.2791
1	Hapmap42827-BTA-116887	8738949	2	0.2857	0.4704	1	0.07862	0.4504		1	Hapmap42827-BTA-116887	2	1	DOM	8/6	200/70	0.2126		1	Hapmap42827-BTA-116887	2	1	REC	0/14	54/216	0.07959
1	BovineHD0100002584	8752633	2	0.1071	0.2989	1	0.03148	0.2815		1	BovineHD0100002584	2	1	DOM	3/11	141/130	0.0295		1	BovineHD0100002584	2	1	REC	0/14	21/250	0.6093
1	BTA-116886-no-rs	8760078	2	0.03571	0.05351	1	1	0.6552		1	BTA-116886-no-rs	2	1	DOM	1/13	29/242	1		1	BTA-116886-no-rs	2	1	REC	0/14	0/271	1
1	BovineHD0100002591	8781288	1	0.1429	0.3506	2	0.02408	0.3087		1	BovineHD0100002591	1	2	DOM	4/10	153/108	0.04858		1	BovineHD0100002591	1	2	REC	0/14	30/231	0.3768
1	ARS-BFGL-NGS-109383	8808124	1	0	0.02963	2	1	0		1	ARS-BFGL-NGS-109383	1	2	DOM	0/14	16/254	1		1	ARS-BFGL-NGS-109383	1	2	REC	0/14	0/270	1
1	BovineHD0100002599	8813992	1	0.1429	0.4125	2	0.004744	0.2373		1	BovineHD0100002599	1	2	DOM	4/10	175/88	0.007267		1	BovineHD0100002599	1	2	REC	0/14	42/221	0.1383
1	Hapmap54753-rs29013987	8831407	1	0.6429	0.4188	2	0.0296	2.498		1	Hapmap54753-rs29013987	1	2	DOM	14/0	186/85	0.0127		1	Hapmap54753-rs29013987	1	2	REC	4/10	41/230	0.248
1	BovineHD0100002609	8850299	2	0.1786	0.4349	1	0.009541	0.2824		1	BovineHD0100002609	2	1	DOM	5/9	185/84	0.01684		1	BovineHD0100002609	2	1	REC	0/14	49/220	0.1391
1	BovineHD0100002622	8908159	2	0.1786	0.2197	1	0.8144	0.7721		1	BovineHD0100002622	2	1	DOM	5/9	104/160	1		1	BovineHD0100002622	2	1	REC	0/14	12/252	1
1	ARS-BFGL-NGS-119108	8937196	1	0.1071	0.1439	2	0.7837	0.7138		1	ARS-BFGL-NGS-119108	1	2	DOM	3/11	73/198	0.7664		1	ARS-BFGL-NGS-119108	1	2	REC	0/14	5/266	1
1	BovineHD0100002644	8993587	1	0.1786	0.2741	2	0.3818	0.5758		1	BovineHD0100002644	1	2	DOM	5/9	132/138	0.4163		1	BovineHD0100002644	1	2	REC	0/14	16/254	1
1	ARS-BFGL-BAC-27364	9069741	2	0.1071	0.1833	1	0.4487	0.5345		1	ARS-BFGL-BAC-27364	2	1	DOM	3/11	92/178	0.3979		1	ARS-BFGL-BAC-27364	2	1	REC	0/14	7/263	1
1	BTA-120428-no-rs	9151571	1	0.2857	0.4225	2	0.1725	0.5467		1	BTA-120428-no-rs	1	2	DOM	8/6	178/93	0.5691		1	BTA-120428-no-rs	1	2	REC	0/14	51/220	0.08223
1	BovineHD0100002683	9178105	1	0.1429	0.3078	2	0.08825	0.3747		1	BovineHD0100002683	1	2	DOM	4/10	139/129	0.1052		1	BovineHD0100002683	1	2	REC	0/14	26/242	0.6262
1	Hapmap49483-BTA-120432	9259731	2	0.1071	0.1716	1	0.6027	0.5794		1	Hapmap49483-BTA-120432	2	1	DOM	3/11	87/184	0.5595		1	Hapmap49483-BTA-120432	2	1	REC	0/14	6/265	1
1	BovineHD0100002710	9260615	1	0.1429	0.3315	2	0.03862	0.3361		1	BovineHD0100002710	1	2	DOM	4/10	150/120	0.05705		1	BovineHD0100002710	1	2	REC	0/14	29/241	0.3745
1	BovineHD0100002717	9285546	2	0.25	0.2091	1	0.6348	1.261		1	BovineHD0100002717	2	1	DOM	7/7	102/161	0.4137		1	BovineHD0100002717	2	1	REC	0/14	8/255	1
1	BovineHD0100002727	9313530	2	0	0.05534	1	0.3885	0		1	BovineHD0100002727	2	1	DOM	0/14	29/233	0.3748		1	BovineHD0100002727	2	1	REC	0/14	0/262	1
1	BovineHD0100002735	9339352	2	0.07143	0.2094	1	0.09129	0.2904		1	BovineHD0100002735	2	1	DOM	2/12	101/164	0.09027		1	BovineHD0100002735	2	1	REC	0/14	10/255	1
1	BovineHD0100002758	9438066	2	0.25	0.2936	1	0.8312	0.8022		1	BovineHD0100002758	2	1	DOM	7/7	137/127	1		1	BovineHD0100002758	2	1	REC	0/14	18/246	0.6096
1	Hapmap59566-rs29024165	9467212	2	0.07143	0.1236	1	0.5603	0.5454		1	Hapmap59566-rs29024165	2	1	DOM	2/12	65/206	0.5316		1	Hapmap59566-rs29024165	2	1	REC	0/14	2/269	1
1	BTA-120430-no-rs	9523532	1	0.25	0.5074	2	0.01063	0.3236		1	BTA-120430-no-rs	1	2	DOM	7/7	206/64	0.05041		1	BTA-120430-no-rs	1	2	REC	0/14	68/202	0.02596
1	Hapmap58026-ss46526282	9592005	2	0.3214	0.3985	1	0.5526	0.7149		1	Hapmap58026-ss46526282	2	1	DOM	9/5	178/93	1		1	Hapmap58026-ss46526282	2	1	REC	0/14	38/233	0.2283
1	ARS-BFGL-NGS-118398	9646618	2	0.2857	0.4207	1	0.1736	0.5509		1	ARS-BFGL-NGS-118398	2	1	DOM	8/6	183/88	0.4008		1	ARS-BFGL-NGS-118398	2	1	REC	0/14	45/226	0.1368
1	BovineHD0100002828	9666125	2	0.2857	0.4291	1	0.1696	0.5321		1	BovineHD0100002828	2	1	DOM	8/6	174/87	0.5634		1	BovineHD0100002828	2	1	REC	0/14	50/211	0.08094
1	BovineHD0100002836	9708099	2	0.2857	0.4275	1	0.1701	0.5357		1	BovineHD0100002836	2	1	DOM	8/6	174/88	0.5646		1	BovineHD0100002836	2	1	REC	0/14	50/212	0.08118
1	ARS-BFGL-NGS-14644	9741307	1	0.03571	0.1402	2	0.156	0.2271		1	ARS-BFGL-NGS-14644	1	2	DOM	1/13	72/199	0.1262		1	ARS-BFGL-NGS-14644	1	2	REC	0/14	4/267	1
1	BovineHD0100002867	9830721	1	0.4286	0.4253	2	1	1.014		1	BovineHD0100002867	1	2	DOM	12/2	176/85	0.2377		1	BovineHD0100002867	1	2	REC	0/14	46/215	0.1367
1	BovineHD0100002870	9843069	1	0.3571	0.2934	2	0.5247	1.338		1	BovineHD0100002870	1	2	DOM	10/4	131/128	0.1716		1	BovineHD0100002870	1	2	REC	0/14	21/238	0.6103
1	BovineHD0100002878	9865496	1	0.2857	0.3268	2	0.8361	0.8238		1	BovineHD0100002878	1	2	DOM	8/6	146/111	1		1	BovineHD0100002878	1	2	REC	0/14	22/235	0.6132
1	BovineHD0100002895	9929401	2	0.1786	0.4106	1	0.01646	0.312		1	BovineHD0100002895	2	1	DOM	5/9	176/87	0.02214		1	BovineHD0100002895	2	1	REC	0/14	40/223	0.233
1	BovineHD0100002913	9990491	1	0.7143	0.4222	2	0.002975	3.422		1	BovineHD0100002913	1	2	DOM	14/0	175/82	0.006887		1	BovineHD0100002913	1	2	REC	6/8	42/215	0.02206
1	BovineHD0100002920	10015824	2	0.1786	0.3722	1	0.04329	0.3666		1	BovineHD0100002920	2	1	DOM	5/9	168/102	0.05447		1	BovineHD0100002920	2	1	REC	0/14	33/237	0.3834
1	BTA-38496-no-rs	10029104	1	0.7143	0.4354	2	0.005518	3.242		1	BTA-38496-no-rs	1	2	DOM	14/0	188/83	0.01255		1	BTA-38496-no-rs	1	2	REC	6/8	48/223	0.03079
1	BovineHD0100002947	10061095	2	0.2143	0.3697	1	0.1087	0.4649		1	BovineHD0100002947	2	1	DOM	6/8	158/103	0.2633		1	BovineHD0100002947	2	1	REC	0/14	35/226	0.2282
1	BovineHD0100002950	10083802	2	0.2143	0.3645	1	0.1549	0.4755		1	BovineHD0100002950	2	1	DOM	6/8	155/107	0.2711		1	BovineHD0100002950	2	1	REC	0/14	36/226	0.2278
1	ARS-BFGL-NGS-113570	10225421	1	0.03571	0.1218	2	0.2336	0.2671		1	ARS-BFGL-NGS-113570	1	2	DOM	1/13	64/207	0.2024		1	ARS-BFGL-NGS-113570	1	2	REC	0/14	2/269	1
1	Hapmap54975-rs29019203	10261207	2	0.25	0.5055	1	0.01073	0.326		1	Hapmap54975-rs29019203	2	1	DOM	7/7	206/65	0.05164		1	Hapmap54975-rs29019203	2	1	REC	0/14	68/203	0.02613
1	BovineHD0100003065	10325849	2	0.07143	0.233	1	0.06	0.2533		1	BovineHD0100003065	2	1	DOM	2/12	111/153	0.04979		1	BovineHD0100003065	2	1	REC	0/14	12/252	1
1	BovineHD0100003089	10376109	2	0.07143	0.2888	1	0.009156	0.1895		1	BovineHD0100003089	2	1	DOM	2/12	127/131	0.0123		1	BovineHD0100003089	2	1	REC	0/14	22/236	0.613
1	Hapmap49138-BTA-37549	10391180	2	0	0.1513	1	0.02306	0		1	Hapmap49138-BTA-37549	2	1	DOM	0/14	71/200	0.02466		1	Hapmap49138-BTA-37549	2	1	REC	0/14	11/260	1
1	Hapmap38504-BTA-51402	10421991	1	0.1786	0.1593	2	0.7914	1.148		1	Hapmap38504-BTA-51402	1	2	DOM	5/9	80/190	0.7652		1	Hapmap38504-BTA-51402	1	2	REC	0/14	6/264	1
1	BovineHD0100003129	10442426	2	0	0.05263	1	0.3877	0		1	BovineHD0100003129	2	1	DOM	0/14	28/238	0.3742		1	BovineHD0100003129	2	1	REC	0/14	0/266	1
1	UA-IFASA-5979	10475147	2	0.2143	0.3875	1	0.07357	0.4312		1	UA-IFASA-5979	2	1	DOM	6/8	168/103	0.1687		1	UA-IFASA-5979	2	1	REC	0/14	42/229	0.2358
1	BovineHD0100003147	10482008	2	0	0.07171	1	0.246	0		1	BovineHD0100003147	2	1	DOM	0/14	35/223	0.2278		1	BovineHD0100003147	2	1	REC	0/14	2/256	1
1	BovineHD0100003154	10501157	2	0.6071	0.4129	1	0.05002	2.198		1	BovineHD0100003154	2	1	DOM	14/0	182/82	0.01254		1	BovineHD0100003154	2	1	REC	3/11	36/228	0.4249
1	AX-18039968	10512329	2	0.2143	0.3222	1	0.2991	0.5737		1	AX-18039968	2	1	DOM	6/8	152/118	0.4109		1	AX-18039968	2	1	REC	0/14	22/248	0.6109
1	BovineHD0100003161	10518325	1	0.2857	0.4074	2	0.2383	0.5818		1	BovineHD0100003161	1	2	DOM	8/6	184/86	0.3924		1	BovineHD0100003161	1	2	REC	0/14	36/234	0.2287
1	ARS-BFGL-NGS-548	10523098	2	0.5357	0.3056	1	0.0199	2.622		1	ARS-BFGL-NGS-548	2	1	DOM	14/0	146/124	0.0003755		1	ARS-BFGL-NGS-548	2	1	REC	1/13	19/251	1
1	ARS-BFGL-NGS-43310	10563465	1	0.3214	0.4742	2	0.1243	0.5253		1	ARS-BFGL-NGS-43310	1	2	DOM	9/5	202/69	0.3663		1	ARS-BFGL-NGS-43310	1	2	REC	0/14	55/216	0.07952
1	ARS-BFGL-NGS-1296	10565732	1	0.1429	0.2103	2	0.4805	0.6257		1	ARS-BFGL-NGS-1296	1	2	DOM	4/10	103/168	0.5797		1	ARS-BFGL-NGS-1296	1	2	REC	0/14	11/260	1
1	BovineHD0100003200	10580176	2	0.3214	0.469	1	0.1724	0.5363		1	BovineHD0100003200	2	1	DOM	9/5	191/67	0.5332		1	BovineHD0100003200	2	1	REC	0/14	51/207	0.07955
1	Hapmap38887-BTA-22281	10605227	2	0.1429	0.2185	1	0.4795	0.596		1	Hapmap38887-BTA-22281	2	1	DOM	4/10	108/162	0.5765		1	Hapmap38887-BTA-22281	2	1	REC	0/14	10/260	1
1	BovineHD0100003225	10647953	1	0.1071	0.1525	2	0.7851	0.6668		1	BovineHD0100003225	1	2	DOM	3/11	74/185	0.7633		1	BovineHD0100003225	1	2	REC	0/14	5/254	1
1	Hapmap57724-rs29022825	10679165	1	0.4286	0.4391	2	1	0.958		1	Hapmap57724-rs29022825	1	2	DOM	12/2	188/83	0.243		1	Hapmap57724-rs29022825	1	2	REC	0/14	50/221	0.1403
1	Hapmap44892-BTA-50337	10724714	1	0.2143	0.3451	2	0.2182	0.5174		1	Hapmap44892-BTA-50337	1	2	DOM	6/8	154/114	0.4074		1	Hapmap44892-BTA-50337	1	2	REC	0/14	31/237	0.3777
1	BTA-50328-no-rs	10747495	1	0.25	0.4796	2	0.01951	0.3616		1	BTA-50328-no-rs	1	2	DOM	7/7	202/68	0.05825		1	BTA-50328-no-rs	1	2	REC	0/14	57/213	0.08035
1	ARS-BFGL-NGS-108684	10771543	1	0.25	0.3271	2	0.5346	0.6856		1	ARS-BFGL-NGS-108684	1	2	DOM	7/7	153/116	0.7833		1	ARS-BFGL-NGS-108684	1	2	REC	0/14	23/246	0.6136
1	Hapmap51183-BTA-19351	10793076	2	0.5357	0.4096	1	0.2379	1.663		1	Hapmap51183-BTA-19351	2	1	DOM	14/0	179/92	0.006094		1	Hapmap51183-BTA-19351	2	1	REC	1/13	43/228	0.7033
1	BovineHD0100003282	10809430	2	0.1071	0.2729	1	0.07557	0.3197		1	BovineHD0100003282	2	1	DOM	3/11	127/135	0.05688		1	BovineHD0100003282	2	1	REC	0/14	16/246	1
1	BovineHD0100003285	10826689	1	0.5357	0.3555	2	0.06878	2.092		1	BovineHD0100003285	1	2	DOM	14/0	159/104	0.001335		1	BovineHD0100003285	1	2	REC	1/13	28/235	1
1	BovineHD0100003303	10887298	2	0.25	0.4457	1	0.05013	0.4146		1	BovineHD0100003303	2	1	DOM	7/7	192/75	0.1265		1	BovineHD0100003303	2	1	REC	0/14	46/221	0.1364
1	BovineHD0100003313	10954721	1	0.1429	0.3523	2	0.02389	0.3065		1	BovineHD0100003313	1	2	DOM	4/10	155/109	0.04855		1	BovineHD0100003313	1	2	REC	0/14	31/233	0.3787
1	Hapmap51416-BTA-19350	10960816	2	0	0.01107	1	1	0		1	Hapmap51416-BTA-19350	2	1	DOM	0/14	6/265	1		1	Hapmap51416-BTA-19350	2	1	REC	0/14	0/271	1
1	ARS-BFGL-NGS-113751	11092797	1	0.2143	0.1989	2	0.8101	1.099		1	ARS-BFGL-NGS-113751	1	2	DOM	6/8	100/169	0.7785		1	ARS-BFGL-NGS-113751	1	2	REC	0/14	7/262	1
1	BovineHD0100003385	11208321	2	0.03571	0.1078	1	0.344	0.3065		1	BovineHD0100003385	2	1	DOM	1/13	52/217	0.4799		1	BovineHD0100003385	2	1	REC	0/14	6/263	1
1	BovineHD0100003390	11227266	1	0.03571	0.0539	2	1	0.6501		1	BovineHD0100003390	1	2	DOM	1/13	29/240	1		1	BovineHD0100003390	1	2	REC	0/14	0/269	1
1	BTA-122626-no-rs	11267601	1	0.03571	0.01845	2	0.4283	1.97		1	BTA-122626-no-rs	1	2	DOM	1/13	10/261	0.4312		1	BTA-122626-no-rs	1	2	REC	0/14	0/271	1
1	BovineHD0100003407	11296054	2	0.03571	0.2171	1	0.01629	0.1336		1	BovineHD0100003407	2	1	DOM	1/13	101/157	0.02024		1	BovineHD0100003407	2	1	REC	0/14	11/247	1
1	BovineHD0100003409	11304599	2	0.1786	0.1858	1	1	0.9525		1	BovineHD0100003409	2	1	DOM	5/9	91/170	1		1	BovineHD0100003409	2	1	REC	0/14	6/255	1
1	BovineHD0200037433	11315803	2	0.1429	0.1402	1	1	1.023		1	BovineHD0200037433	2	1	DOM	3/11	68/196	1		1	BovineHD0200037433	2	1	REC	1/13	6/258	0.3063
1	Hapmap60823-rs29019235	11341018	2	0.03571	0.01845	1	0.4283	1.97		1	Hapmap60823-rs29019235	2	1	DOM	1/13	10/261	0.4312		1	Hapmap60823-rs29019235	2	1	REC	0/14	0/271	1
1	ARS-BFGL-NGS-36767	11400789	2	0.5357	0.3893	1	0.1644	1.81		1	ARS-BFGL-NGS-36767	2	1	DOM	10/4	176/95	0.7769		1	ARS-BFGL-NGS-36767	2	1	REC	5/9	35/236	0.03244
1	BovineHD0100003437	11462748	1	0.4643	0.4797	2	1	0.94		1	BovineHD0100003437	1	2	DOM	10/4	205/66	0.752		1	BovineHD0100003437	1	2	REC	3/11	55/216	1
1	Hapmap40304-BTA-17131	11472285	1	0.25	0.2768	2	0.832	0.8711		1	Hapmap40304-BTA-17131	1	2	DOM	7/7	135/136	1		1	Hapmap40304-BTA-17131	1	2	REC	0/14	15/256	1
1	BovineHD0100003453	11509566	2	0.25	0.47	1	0.03085	0.3758		1	BovineHD0100003453	2	1	DOM	7/7	197/70	0.06577		1	BovineHD0100003453	2	1	REC	0/14	54/213	0.07942
1	BovineHD0100003459	11541372	1	0.4286	0.4736	2	0.7006	0.8337		1	BovineHD0100003459	1	2	DOM	10/4	192/73	1		1	BovineHD0100003459	1	2	REC	2/12	59/206	0.7414
1	Hapmap38737-BTA-22640	11647870	2	0	0.03889	1	0.6165	0		1	Hapmap38737-BTA-22640	2	1	DOM	0/14	21/249	0.6093		1	Hapmap38737-BTA-22640	2	1	REC	0/14	0/270	1
1	BovineHD0100003487	11671029	1	0.4643	0.2143	2	0.004388	3.178		1	BovineHD0100003487	1	2	DOM	12/2	105/161	0.001147		1	BovineHD0100003487	1	2	REC	1/13	9/257	0.4064
1	BovineHD0100003501	11735568	2	0.1071	0.1528	1	0.7853	0.6652		1	BovineHD0100003501	2	1	DOM	3/11	76/189	0.7634		1	BovineHD0100003501	2	1	REC	0/14	5/260	1
1	Hapmap54322-rs29009637	11776956	2	0.1071	0.1993	1	0.3279	0.4822		1	Hapmap54322-rs29009637	2	1	DOM	3/11	95/176	0.3934		1	Hapmap54322-rs29009637	2	1	REC	0/14	13/258	1
1	BovineHD0100003524	11818525	2	0.2857	0.4814	1	0.05187	0.4309		1	BovineHD0100003524	2	1	DOM	8/6	198/71	0.217		1	BovineHD0100003524	2	1	REC	0/14	61/208	0.04554
1	Hapmap43814-BTA-22629	11840829	2	0.1786	0.2066	1	1	0.8346		1	Hapmap43814-BTA-22629	2	1	DOM	5/9	101/170	1		1	Hapmap43814-BTA-22629	2	1	REC	0/14	11/260	1
1	BovineHD0100003573	11956821	1	0.2692	0.4023	2	0.2195	0.5475		1	BovineHD0100003573	1	2	DOM	7/6	178/88	0.3727		1	BovineHD0100003573	1	2	REC	0/13	36/230	0.3862
1	Hapmap55642-rs29027263	11993667	2	0.5357	0.3856	1	0.1175	1.838		1	Hapmap55642-rs29027263	2	1	DOM	10/4	176/95	0.7769		1	Hapmap55642-rs29027263	2	1	REC	5/9	33/238	0.02624
1	BovineHD0100003588	12049311	2	0.4643	0.5	1	0.8467	0.8667		1	BovineHD0100003588	2	1	DOM	9/5	205/63	0.3367		1	BovineHD0100003588	2	1	REC	4/10	63/205	0.7474
1	BovineHD0100003597	12069543	1	0.3571	0.3849	2	0.8439	0.8878		1	BovineHD0100003597	1	2	DOM	8/6	166/99	0.7789		1	BovineHD0100003597	1	2	REC	2/12	38/227	1
1	BovineHD0100003627	12200034	2	0.3214	0.4815	1	0.1208	0.51		1	BovineHD0100003627	2	1	DOM	7/7	200/71	0.06557		1	BovineHD0100003627	2	1	REC	2/12	61/210	0.7419
1	BovineHD0100003636	12239641	1	0	0.07722	2	0.2458	0		1	BovineHD0100003636	1	2	DOM	0/13	38/221	0.2258		1	BovineHD0100003636	1	2	REC	0/13	2/257	1
1	ARS-BFGL-NGS-115663	12354879	1	0	0.04259	2	0.6204	0		1	ARS-BFGL-NGS-115663	1	2	DOM	0/14	22/248	0.6109		1	ARS-BFGL-NGS-115663	1	2	REC	0/14	1/269	1
1	BovineHD0100003683	12383178	2	0.2692	0.186	1	0.3055	1.612		1	BovineHD0100003683	2	1	DOM	7/6	90/168	0.2342		1	BovineHD0100003683	2	1	REC	0/13	6/252	1
1	BovineHD0100003686	12393568	2	0.3929	0.468	1	0.5605	0.7354		1	BovineHD0100003686	2	1	DOM	11/3	193/73	0.765		1	BovineHD0100003686	2	1	REC	0/14	56/210	0.08009
1	BTA-54331-no-rs	12430421	2	0.1071	0.07993	1	0.4895	1.381		1	BTA-54331-no-rs	2	1	DOM	3/11	42/227	0.4727		1	BTA-54331-no-rs	2	1	REC	0/14	1/268	1
1	Hapmap43879-BTA-54328	12455251	2	0.1786	0.1463	1	0.5887	1.269		1	Hapmap43879-BTA-54328	2	1	DOM	5/9	75/195	0.547		1	Hapmap43879-BTA-54328	2	1	REC	0/14	4/266	1
1	Hapmap55464-rs29015665	12475971	2	0.3571	0.4907	1	0.1803	0.5765		1	Hapmap55464-rs29015665	2	1	DOM	6/8	203/67	0.01243		1	Hapmap55464-rs29015665	2	1	REC	4/10	62/208	0.7451
1	BTA-54318-no-rs	12497912	1	0.2143	0.3395	2	0.2184	0.5306		1	BTA-54318-no-rs	1	2	DOM	5/9	153/118	0.1691		1	BTA-54318-no-rs	1	2	REC	1/13	31/240	1
1	BovineHD0100003734	12569498	2	0.3571	0.3914	1	0.8432	0.8639		1	BovineHD0100003734	2	1	DOM	7/7	167/100	0.4018		1	BovineHD0100003734	2	1	REC	3/11	42/225	0.4759
1	BovineHD0100003761	12691827	1	0.3571	0.3214	2	0.6828	1.173		1	BovineHD0100003761	1	2	DOM	10/4	146/120	0.2771		1	BovineHD0100003761	1	2	REC	0/14	25/241	0.6222
1	BovineHD0100003770	12732497	2	0.3571	0.3494	1	1	1.034		1	BovineHD0100003770	2	1	DOM	10/4	157/112	0.4114		1	BovineHD0100003770	2	1	REC	0/14	31/238	0.3774
1	BTB-00005611	12803538	2	0.2143	0.2915	1	0.521	0.6628		1	BTB-00005611	2	1	DOM	6/8	137/134	0.5973		1	BTB-00005611	2	1	REC	0/14	21/250	0.6093
1	BovineHD0100003819	12940114	2	0.2857	0.2566	1	0.8246	1.159		1	BovineHD0100003819	2	1	DOM	5/9	123/142	0.5844		1	BovineHD0100003819	2	1	REC	3/11	13/252	0.0383
1	Hapmap60346-rs29019231	12988191	1	0.1429	0.3653	2	0.01512	0.2896		1	Hapmap60346-rs29019231	1	2	DOM	4/10	167/104	0.02224		1	Hapmap60346-rs29019231	1	2	REC	0/14	31/240	0.377
1	BovineHD0100003869	13110312	2	0.2143	0.2926	1	0.5212	0.6594		1	BovineHD0100003869	2	1	DOM	6/8	136/134	0.7852		1	BovineHD0100003869	2	1	REC	0/14	22/248	0.6109
1	Hapmap38791-BTA-89194	13177821	2	0	0.07963	1	0.2578	0		1	Hapmap38791-BTA-89194	2	1	DOM	0/14	43/227	0.1387		1	Hapmap38791-BTA-89194	2	1	REC	0/14	0/270	1
1	BovineHD0100003917	13253220	1	0.2143	0.1887	2	0.8042	1.173		1	BovineHD0100003917	1	2	DOM	6/8	94/171	0.5781		1	BovineHD0100003917	1	2	REC	0/14	6/259	1
1	ARS-BFGL-BAC-11044	13395358	1	0.1071	0.2638	2	0.0754	0.3348		1	ARS-BFGL-BAC-11044	1	2	DOM	3/11	127/144	0.0963		1	ARS-BFGL-BAC-11044	1	2	REC	0/14	16/255	1
1	BovineHD4100000092	13527122	1	0.2143	0.2715	2	0.6627	0.7317		1	BovineHD4100000092	1	2	DOM	6/8	127/140	0.7896		1	BovineHD4100000092	1	2	REC	0/14	18/249	0.6101
1	ARS-BFGL-BAC-685	13575805	1	0	0.08148	2	0.1553	0		1	ARS-BFGL-BAC-685	1	2	DOM	0/14	44/226	0.1374		1	ARS-BFGL-BAC-685	1	2	REC	0/14	0/270	1
1	BovineHD0100004029	13601105	2	0.2308	0.3547	1	0.291	0.5459		1	BovineHD0100004029	2	1	DOM	6/7	156/102	0.3871		1	BovineHD0100004029	2	1	REC	0/13	27/231	0.3754
1	BovineHD0100004039	13643769	1	0.2308	0.334	2	0.3925	0.5983		1	BovineHD0100004039	1	2	DOM	6/7	150/115	0.5701		1	BovineHD0100004039	1	2	REC	0/13	27/238	0.6228
1	Hapmap24222-BTA-88936	13665306	2	0.2143	0.4151	1	0.04674	0.3842		1	Hapmap24222-BTA-88936	2	1	DOM	5/9	178/93	0.04101		1	Hapmap24222-BTA-88936	2	1	REC	1/13	47/224	0.4774
1	BovineHD0100004053	13702454	2	0.5714	0.468	1	0.3337	1.515		1	BovineHD0100004053	2	1	DOM	11/3	196/70	1		1	BovineHD0100004053	2	1	REC	5/9	53/213	0.1757
1	ARS-BFGL-NGS-21333	13877483	2	0.1786	0.1278	1	0.3934	1.484		1	ARS-BFGL-NGS-21333	2	1	DOM	5/9	66/204	0.3496		1	ARS-BFGL-NGS-21333	2	1	REC	0/14	3/267	1
1	BovineHD0100004106	13914324	1	0.25	0.3926	2	0.164	0.5157		1	BovineHD0100004106	1	2	DOM	7/7	178/92	0.2551		1	BovineHD0100004106	1	2	REC	0/14	34/236	0.3876
1	BovineHD0100004109	13925424	2	0.4286	0.485	1	0.6987	0.7963		1	BovineHD0100004109	2	1	DOM	9/5	205/62	0.3333		1	BovineHD0100004109	2	1	REC	3/11	54/213	1
1	BovineHD0100004147	14064963	2	0.3214	0.3321	1	1	0.9528		1	BovineHD0100004147	2	1	DOM	9/5	150/115	0.783		1	BovineHD0100004147	2	1	REC	0/14	26/239	0.3764
1	BovineHD0100004161	14122474	1	0.2857	0.2895	2	1	0.9818		1	BovineHD0100004161	1	2	DOM	8/6	134/132	0.7854		1	BovineHD0100004161	1	2	REC	0/14	20/246	0.6086
1	BovineHD0100004179	14218125	2	0.4643	0.417	1	0.6958	1.212		1	BovineHD0100004179	2	1	DOM	10/4	182/89	1		1	BovineHD0100004179	2	1	REC	3/11	44/227	0.7093
1	BovineHD0100004186	14235061	1	0.4286	0.3289	2	0.3057	1.53		1	BovineHD0100004186	1	2	DOM	9/5	154/109	0.7847		1	BovineHD0100004186	1	2	REC	3/11	19/244	0.08918
1	BovineHD0100004251	14380075	1	0.1071	0.1455	2	0.7837	0.7046		1	BovineHD0100004251	1	2	DOM	3/11	74/194	0.7647		1	BovineHD0100004251	1	2	REC	0/14	4/264	1
1	BovineHD0100004290	14505711	1	0	0.1161	2	0.06045	0		1	BovineHD0100004290	1	2	DOM	0/14	57/210	0.08079		1	BovineHD0100004290	1	2	REC	0/14	5/262	1
1	BTA-103292-no-rs	14533366	2	0.1071	0.08333	1	0.7227	1.32		1	BTA-103292-no-rs	2	1	DOM	3/11	45/225	0.7124		1	BTA-103292-no-rs	2	1	REC	0/14	0/270	1
1	ARS-BFGL-NGS-26402	14579710	2	0.03571	0.09963	1	0.5057	0.3347		1	ARS-BFGL-NGS-26402	2	1	DOM	1/13	52/219	0.4793		1	ARS-BFGL-NGS-26402	2	1	REC	0/14	2/269	1
1	Hapmap24335-BTA-127763	14616735	1	0.4286	0.4797	2	0.6992	0.8135		1	Hapmap24335-BTA-127763	1	2	DOM	10/4	201/70	0.7623		1	Hapmap24335-BTA-127763	1	2	REC	2/12	59/212	0.7412
1	ARS-BFGL-BAC-14883	14655035	1	0.1071	0.1882	2	0.4511	0.5176		1	ARS-BFGL-BAC-14883	1	2	DOM	3/11	94/177	0.3948		1	ARS-BFGL-BAC-14883	1	2	REC	0/14	8/263	1
1	BovineHD0100004342	14735286	1	0.5	0.4663	2	0.8464	1.145		1	BovineHD0100004342	1	2	DOM	11/3	192/75	0.7639		1	BovineHD0100004342	1	2	REC	3/11	57/210	1
1	BovineHD0100004343	14740618	1	0.2857	0.3365	2	0.6835	0.7888		1	BovineHD0100004343	1	2	DOM	8/6	145/121	1		1	BovineHD0100004343	1	2	REC	0/14	34/232	0.2308
1	BovineHD0100004359	14783511	2	0.2308	0.3365	1	0.2952	0.5916		1	BovineHD0100004359	2	1	DOM	6/7	149/117	0.5725		1	BovineHD0100004359	2	1	REC	0/13	30/236	0.373
1	BovineHD0100004373	14824048	2	0	0.0653	1	0.2463	0		1	BovineHD0100004373	2	1	DOM	0/14	35/233	0.2295		1	BovineHD0100004373	2	1	REC	0/14	0/268	1
1	BovineHD0100004398	14880156	2	0.3929	0.417	1	0.8466	0.9047		1	BovineHD0100004398	2	1	DOM	9/5	177/88	1		1	BovineHD0100004398	2	1	REC	2/12	44/221	1
1	BovineHD0100004435	15009567	1	0.1154	0.2672	2	0.1083	0.3578		1	BovineHD0100004435	1	2	DOM	3/10	117/145	0.1577		1	BovineHD0100004435	1	2	REC	0/13	23/239	0.6103
1	ARS-BFGL-NGS-107530	15017291	1	0.2857	0.2362	2	0.5042	1.294		1	ARS-BFGL-NGS-107530	1	2	DOM	6/8	115/156	1		1	ARS-BFGL-NGS-107530	1	2	REC	2/12	13/258	0.1631
1	BTB-01807638	15049490	2	0.2143	0.1944	1	0.8072	1.13		1	BTB-01807638	2	1	DOM	5/9	95/175	1		1	BTB-01807638	2	1	REC	1/13	10/260	0.4324
1	BTA-28028-no-rs	15092475	1	0.03571	0.09515	2	0.5008	0.3522		1	BTA-28028-no-rs	1	2	DOM	1/13	47/221	0.4768		1	BTA-28028-no-rs	1	2	REC	0/14	4/264	1
1	BTB-00502293	15126234	1	0.1071	0.2066	2	0.237	0.4607		1	BTB-00502293	1	2	DOM	3/11	101/170	0.27		1	BTB-00502293	1	2	REC	0/14	11/260	1
1	BTA-97382-no-rs	15241004	1	0.3929	0.3635	2	0.8409	1.133		1	BTA-97382-no-rs	1	2	DOM	9/5	168/103	1		1	BTA-97382-no-rs	1	2	REC	2/12	29/242	0.655
1	BovineHD0100004528	15381892	1	0.4643	0.3759	2	0.4248	1.439		1	BovineHD0100004528	1	2	DOM	11/3	163/103	0.2624		1	BovineHD0100004528	1	2	REC	2/12	37/229	1
1	BovineHD0100004540	15430091	2	0.4615	0.3649	1	0.4051	1.492		1	BovineHD0100004540	2	1	DOM	10/3	156/103	0.2617		1	BovineHD0100004540	2	1	REC	2/11	33/226	0.677
1	Hapmap50227-BTA-113868	15440999	2	0.3214	0.3192	1	1	1.01		1	Hapmap50227-BTA-113868	2	1	DOM	9/5	146/125	0.585		1	Hapmap50227-BTA-113868	2	1	REC	0/14	27/244	0.3759
1	BovineHD0100004550	15464786	1	0.2857	0.3596	2	0.5447	0.7125		1	BovineHD0100004550	1	2	DOM	6/8	166/101	0.1671		1	BovineHD0100004550	1	2	REC	2/12	26/241	0.638
1	BovineHD0100004579	15508545	1	0.1429	0.1842	2	0.8018	0.7381		1	BovineHD0100004579	1	2	DOM	4/10	86/180	1		1	BovineHD0100004579	1	2	REC	0/14	12/254	1
1	BovineHD0100004592	15557674	2	0.4286	0.4004	1	0.8439	1.123		1	BovineHD0100004592	2	1	DOM	10/4	174/92	0.7776		1	BovineHD0100004592	2	1	REC	2/12	39/227	1
1	BovineHD4100000100	15577736	2	0.3077	0.2738	1	0.6598	1.179		1	BovineHD4100000100	2	1	DOM	8/5	125/138	0.3995		1	BovineHD4100000100	2	1	REC	0/13	19/244	0.6096
1	ARS-BFGL-NGS-102441	15592825	2	0.2143	0.2177	1	1	0.98		1	ARS-BFGL-NGS-102441	2	1	DOM	6/8	110/161	1		1	ARS-BFGL-NGS-102441	2	1	REC	0/14	8/263	1
1	ARS-BFGL-BAC-13008	15612315	2	0.2857	0.2232	1	0.4866	1.392		1	ARS-BFGL-BAC-13008	2	1	DOM	6/8	111/160	1		1	ARS-BFGL-BAC-13008	2	1	REC	2/12	10/261	0.1116
1	BTA-113886-no-rs	15643337	2	0.5	0.5	1	1	1		1	BTA-113886-no-rs	2	1	DOM	11/3	202/68	1		1	BTA-113886-no-rs	2	1	REC	3/11	68/202	1
1	BTA-113888-no-rs	15669879	2	0.1786	0.1685	1	0.7999	1.073		1	BTA-113888-no-rs	2	1	DOM	5/9	87/183	0.7754		1	BTA-113888-no-rs	2	1	REC	0/14	4/266	1
1	BovineHD0100004654	15699132	1	0	0.03053	2	1	0		1	BovineHD0100004654	1	2	DOM	0/13	16/246	1		1	BovineHD0100004654	1	2	REC	0/13	0/262	1
1	BovineHD0100004673	15757230	1	0.1786	0.1245	2	0.3836	1.528		1	BovineHD0100004673	1	2	DOM	5/9	65/200	0.3509		1	BovineHD0100004673	1	2	REC	0/14	1/264	1
1	BovineHD0100004686	15816006	1	0	0.07331	2	0.2478	0		1	BovineHD0100004686	1	2	DOM	0/14	39/227	0.23		1	BovineHD0100004686	1	2	REC	0/14	0/266	1
1	BovineHD0100004731	16007329	1	0.1071	0.218	2	0.2346	0.4303		1	BovineHD0100004731	1	2	DOM	3/11	103/163	0.2624		1	BovineHD0100004731	1	2	REC	0/14	13/253	1
1	Hapmap58809-rs29017514	16044068	2	0.2143	0.1771	1	0.6139	1.267		1	Hapmap58809-rs29017514	2	1	DOM	5/9	92/179	1		1	Hapmap58809-rs29017514	2	1	REC	1/13	4/267	0.2241
1	BTB-01193581	16114873	2	0.3571	0.345	1	1	1.055		1	BTB-01193581	2	1	DOM	8/6	151/120	1		1	BTB-01193581	2	1	REC	2/12	36/235	1
1	BTB-00569345	16155668	1	0.1786	0.2435	2	0.5051	0.6752		1	BTB-00569345	1	2	DOM	5/9	110/161	0.7871		1	BTB-00569345	1	2	REC	0/14	22/249	0.6108
1	ARS-BFGL-NGS-95377	16186991	2	0.3214	0.3796	1	0.6898	0.7741		1	ARS-BFGL-NGS-95377	2	1	DOM	6/8	171/99	0.1581		1	ARS-BFGL-NGS-95377	2	1	REC	3/11	34/236	0.4044
1	BTB-01193494	16265007	1	0.3214	0.2985	2	0.8332	1.113		1	BTB-01193494	1	2	DOM	6/8	142/126	0.5856		1	BTB-01193494	1	2	REC	3/11	18/250	0.07603
1	ARS-BFGL-NGS-109692	16306198	1	0	0.08148	2	0.1553	0		1	ARS-BFGL-NGS-109692	1	2	DOM	0/14	43/227	0.1387		1	ARS-BFGL-NGS-109692	1	2	REC	0/14	1/269	1
1	BovineHD0100004829	16330432	2	0.1429	0.2113	1	0.4799	0.622		1	BovineHD0100004829	2	1	DOM	4/10	99/166	0.5824		1	BovineHD0100004829	2	1	REC	0/14	13/252	1
1	BovineHD0100004833	16355046	2	0.5	0.4676	1	0.8413	1.139		1	BovineHD0100004833	2	1	DOM	10/3	190/72	1		1	BovineHD0100004833	2	1	REC	3/10	55/207	0.7404
1	Hapmap41782-BTA-16216	16362952	2	0.1786	0.1667	1	0.798	1.087		1	Hapmap41782-BTA-16216	2	1	DOM	5/9	87/183	0.7754		1	Hapmap41782-BTA-16216	2	1	REC	0/14	3/267	1
1	BTB-01999110	16403017	2	0.3571	0.3926	1	0.8432	0.8595		1	BTB-01999110	2	1	DOM	8/6	174/96	0.5789		1	BTB-01999110	2	1	REC	2/12	38/232	1
1	ARS-BFGL-NGS-32422	16447333	1	0.4643	0.4944	2	0.8472	0.8861		1	ARS-BFGL-NGS-32422	1	2	DOM	9/5	205/65	0.3442		1	ARS-BFGL-NGS-32422	1	2	REC	4/10	62/208	0.7451
1	BovineHD0100004898	16579388	2	0.4286	0.3571	1	0.4287	1.35		1	BovineHD0100004898	2	1	DOM	9/5	158/108	0.787		1	BovineHD0100004898	2	1	REC	3/11	32/234	0.3952
1	BTA-110801-no-rs	16604159	2	0.4643	0.3229	1	0.1483	1.818		1	BTA-110801-no-rs	2	1	DOM	11/3	146/125	0.09756		1	BTA-110801-no-rs	2	1	REC	2/12	29/242	0.655
1	BovineHD0100004919	16643923	1	0.03846	0.2356	2	0.01526	0.1298		1	BovineHD0100004919	1	2	DOM	1/12	113/148	0.009726		1	BovineHD0100004919	1	2	REC	0/13	10/251	1
1	BovineHD0100004926	16666424	1	0.03846	0.2433	2	0.01521	0.1244		1	BovineHD0100004926	1	2	DOM	1/12	117/144	0.008345		1	BovineHD0100004926	1	2	REC	0/13	10/251	1
1	BTB-01919348	16705237	1	0	0.06089	2	0.3965	0		1	BTB-01919348	1	2	DOM	0/14	33/238	0.383		1	BTB-01919348	1	2	REC	0/14	0/271	1
1	BTB-01084253	16754495	2	0.03571	0.09594	1	0.5016	0.349		1	BTB-01084253	2	1	DOM	1/13	51/220	0.4778		1	BTB-01084253	2	1	REC	0/14	1/270	1
1	ARS-BFGL-NGS-41853	16844981	2	0.1429	0.2103	1	0.4805	0.6257		1	ARS-BFGL-NGS-41853	2	1	DOM	4/10	102/169	0.5812		1	ARS-BFGL-NGS-41853	2	1	REC	0/14	12/259	1
1	BovineHD0100004973	16859361	2	0.4286	0.4539	1	0.8476	0.9024		1	BovineHD0100004973	2	1	DOM	9/5	194/77	0.5535		1	BovineHD0100004973	2	1	REC	3/11	52/219	0.7377
1	BovineHD0100004984	16929334	2	0	0.09963	1	0.09722	0		1	BovineHD0100004984	2	1	DOM	0/14	52/219	0.08102		1	BovineHD0100004984	2	1	REC	0/14	2/269	1
1	BTB-01083987	16967412	1	0.3571	0.4151	2	0.6944	0.7827		1	BTB-01083987	1	2	DOM	8/6	179/92	0.5668		1	BTB-01083987	1	2	REC	2/12	46/225	1
1	Hapmap51162-BTA-118728	16993213	2	0.4643	0.4908	1	0.8477	0.8992		1	Hapmap51162-BTA-118728	2	1	DOM	9/5	203/68	0.3599		1	Hapmap51162-BTA-118728	2	1	REC	4/10	63/208	0.7463
1	ARS-BFGL-NGS-22727	17041419	1	0.3571	0.3579	2	1	0.9966		1	ARS-BFGL-NGS-22727	1	2	DOM	6/8	162/109	0.2672		1	ARS-BFGL-NGS-22727	1	2	REC	4/10	32/239	0.08492
1	BTB-01872049	17105670	1	0.1786	0.2085	2	0.8151	0.8253		1	BTB-01872049	1	2	DOM	5/9	107/164	1		1	BTB-01872049	1	2	REC	0/14	6/265	1
1	BovineHD0100005059	17170037	2	0.2143	0.3276	1	0.2987	0.5598		1	BovineHD0100005059	2	1	DOM	6/8	151/110	0.2828		1	BovineHD0100005059	2	1	REC	0/14	20/241	0.6086
1	BTA-118719-no-rs	17192788	2	0.2143	0.329	1	0.2994	0.5562		1	BTA-118719-no-rs	2	1	DOM	6/8	156/113	0.2815		1	BTA-118719-no-rs	2	1	REC	0/14	21/248	0.6094
1	Hapmap60239-rs29019581	17235751	2	0.2143	0.2823	1	0.5217	0.6934		1	Hapmap60239-rs29019581	2	1	DOM	6/8	136/135	0.7852		1	Hapmap60239-rs29019581	2	1	REC	0/14	17/254	1
1	Hapmap39625-BTA-118605	17263605	2	0.1429	0.2528	1	0.2612	0.4926		1	Hapmap39625-BTA-118605	2	1	DOM	4/10	122/147	0.2759		1	Hapmap39625-BTA-118605	2	1	REC	0/14	14/255	1
1	BTB-00757818	17350471	1	0.3571	0.3654	2	1	0.9649		1	BTB-00757818	1	2	DOM	6/8	161/99	0.1694		1	BTB-00757818	1	2	REC	4/10	29/231	0.07298
1	BovineHD0100005100	17410539	1	0.4286	0.3628	2	0.5471	1.317		1	BovineHD0100005100	1	2	DOM	9/5	166/100	1		1	BovineHD0100005100	1	2	REC	3/11	27/239	0.1794
1	BTB-00757888	17441499	1	0.3929	0.4133	2	1	0.9186		1	BTB-00757888	1	2	DOM	9/5	184/87	0.7748		1	BTB-00757888	1	2	REC	2/12	40/231	1
1	ARS-BFGL-NGS-51809	17481344	1	0.3929	0.4291	2	0.8452	0.8609		1	ARS-BFGL-NGS-51809	1	2	DOM	9/5	183/85	0.7727		1	ARS-BFGL-NGS-51809	1	2	REC	2/12	47/221	1
1	BTA-118731-no-rs	17513897	2	0.4286	0.5	1	0.562	0.75		1	BTA-118731-no-rs	2	1	DOM	9/5	208/63	0.3336		1	BTA-118731-no-rs	2	1	REC	3/11	63/208	1
1	BovineHD0100005160	17549923	2	0.3929	0.4234	1	0.8455	0.8813		1	BovineHD0100005160	2	1	DOM	9/5	173/88	1		1	BovineHD0100005160	2	1	REC	2/12	48/213	1
1	BovineHD0100005187	17604891	2	0.25	0.2746	1	1	0.8805		1	BovineHD0100005187	2	1	DOM	7/7	126/138	1		1	BovineHD0100005187	2	1	REC	0/14	19/245	0.6085
1	BovineHD0100005191	17630258	2	0.07143	0.1553	1	0.2889	0.4184		1	BovineHD0100005191	2	1	DOM	2/12	73/191	0.3649		1	BovineHD0100005191	2	1	REC	0/14	9/255	1
1	Hapmap54349-rs29011587	17672335	2	0.1429	0.0572	1	0.08477	2.747		1	Hapmap54349-rs29011587	2	1	DOM	4/10	30/241	0.07103		1	Hapmap54349-rs29011587	2	1	REC	0/14	1/270	1
1	Hapmap48613-BTA-112066	17806576	2	0.1786	0.125	1	0.385	1.522		1	Hapmap48613-BTA-112066	2	1	DOM	5/9	64/204	0.3416		1	Hapmap48613-BTA-112066	2	1	REC	0/14	3/265	1
1	BTA-20344-no-rs	17839302	2	0.1429	0.07196	1	0.1521	2.15		1	BTA-20344-no-rs	2	1	DOM	4/10	38/233	0.1344		1	BTA-20344-no-rs	2	1	REC	0/14	1/270	1
1	BovineHD0100005238	17886413	1	0.25	0.3314	2	0.4165	0.6724		1	BovineHD0100005238	1	2	DOM	6/8	150/114	0.4087		1	BovineHD0100005238	1	2	REC	1/13	25/239	1
1	ARS-BFGL-NGS-112632	17933659	1	0.3571	0.4502	2	0.4361	0.6785		1	ARS-BFGL-NGS-112632	1	2	DOM	6/8	191/80	0.03847		1	ARS-BFGL-NGS-112632	1	2	REC	4/10	53/218	0.49
1	BTB-00005987	17957377	1	0.4643	0.2712	2	0.03204	2.329		1	BTB-00005987	1	2	DOM	10/4	128/143	0.1008		1	BTB-00005987	1	2	REC	3/11	19/252	0.08325
1	Hapmap44269-BTA-67047	18013704	1	0.07143	0.316	2	0.005127	0.1665		1	Hapmap44269-BTA-67047	1	2	DOM	2/12	145/124	0.004702		1	Hapmap44269-BTA-67047	1	2	REC	0/14	25/244	0.6211
1	BovineHD0100005323	18165726	1	0.3462	0.4808	2	0.2279	0.5716		1	BovineHD0100005323	1	2	DOM	7/6	197/64	0.1022		1	BovineHD0100005323	1	2	REC	2/11	54/207	1
1	BovineHD0100005338	18249935	2	0.5	0.4944	1	1	1.023		1	BovineHD0100005338	2	1	DOM	10/4	197/69	0.7631		1	BovineHD0100005338	2	1	REC	4/10	66/200	0.7548
1	ARS-BFGL-NGS-26632	18299875	1	0.4286	0.2915	2	0.1389	1.823		1	ARS-BFGL-NGS-26632	1	2	DOM	9/5	135/136	0.4124		1	ARS-BFGL-NGS-26632	1	2	REC	3/11	23/248	0.1246
1	BovineHD0100005358	18336197	1	0.1154	0.1353	2	1	0.8333		1	BovineHD0100005358	1	2	DOM	3/10	61/205	1		1	BovineHD0100005358	1	2	REC	0/13	11/255	1
1	BovineHD0100005377	18360408	1	0.3462	0.2167	2	0.1455	1.913		1	BovineHD0100005377	1	2	DOM	7/6	107/156	0.3946		1	BovineHD0100005377	1	2	REC	2/11	7/256	0.06122
1	BTB-00006408	18378081	1	0.03571	0.2201	2	0.01616	0.1312		1	BTB-00006408	1	2	DOM	1/13	110/158	0.01062		1	BTB-00006408	1	2	REC	0/14	8/260	1
1	Hapmap28603-BTA-123758	18439746	1	0	0.01107	2	1	0		1	Hapmap28603-BTA-123758	1	2	DOM	0/14	6/265	1		1	Hapmap28603-BTA-123758	1	2	REC	0/14	0/271	1
1	BovineHD0100005444	18544855	2	0.3846	0.3008	1	0.3858	1.453		1	BovineHD0100005444	2	1	DOM	8/5	136/130	0.5745		1	BovineHD0100005444	2	1	REC	2/11	24/242	0.3461
1	BTB-01511695	18608496	2	0.4286	0.3315	1	0.3084	1.513		1	BTB-01511695	2	1	DOM	10/4	155/115	0.4081		1	BTB-01511695	2	1	REC	2/12	24/246	0.3732
1	BTB-01511764	18640129	1	0.5357	0.4114	2	0.2386	1.651		1	BTB-01511764	1	2	DOM	11/3	181/90	0.5598		1	BTB-01511764	1	2	REC	4/10	42/229	0.2533
1	BTB-01931918	18679090	2	0.2857	0.4686	1	0.0788	0.4535		1	BTB-01931918	2	1	DOM	6/8	199/72	0.0272		1	BTB-01931918	2	1	REC	2/12	55/216	0.7433
1	Hapmap50395-BTA-57301	18735528	2	0.3929	0.2944	1	0.2918	1.55		1	Hapmap50395-BTA-57301	2	1	DOM	9/5	136/134	0.4135		1	Hapmap50395-BTA-57301	2	1	REC	2/12	23/247	0.3541
1	BTA-06080-no-rs	18758458	2	0.3571	0.2974	1	0.5281	1.312		1	BTA-06080-no-rs	2	1	DOM	9/5	137/132	0.4155		1	BTA-06080-no-rs	2	1	REC	1/13	23/246	1
1	BovineHD0100005509	18764873	1	0.5714	0.4591	2	0.2518	1.571		1	BovineHD0100005509	1	2	DOM	13/1	199/70	0.2016		1	BovineHD0100005509	1	2	REC	3/11	48/221	0.7229
1	Hapmap33466-BTA-107178	18789066	1	0.2857	0.1586	2	0.1108	2.122		1	Hapmap33466-BTA-107178	1	2	DOM	8/6	80/188	0.04033		1	Hapmap33466-BTA-107178	1	2	REC	0/14	5/263	1
1	BovineHD0100005518	18826962	2	0.1786	0.1386	1	0.5747	1.351		1	BovineHD0100005518	2	1	DOM	5/9	70/197	0.5349		1	BovineHD0100005518	2	1	REC	0/14	4/263	1
1	BovineHD0100005525	18866155	2	0.25	0.3962	1	0.1633	0.5079		1	BovineHD0100005525	2	1	DOM	7/7	178/87	0.2451		1	BovineHD0100005525	2	1	REC	0/14	32/233	0.3816
1	BovineHD0100005531	18918611	1	0.1071	0.2085	2	0.2359	0.4556		1	BovineHD0100005531	1	2	DOM	3/11	97/174	0.3919		1	BovineHD0100005531	1	2	REC	0/14	16/255	1
1	BTB-01890165	18976190	1	0	0.01107	2	1	0		1	BTB-01890165	1	2	DOM	0/14	6/265	1		1	BTB-01890165	1	2	REC	0/14	0/271	1
1	BTB-01342789	19016808	1	0.2143	0.3593	2	0.155	0.4864		1	BTB-01342789	1	2	DOM	6/8	162/108	0.266		1	BTB-01342789	1	2	REC	0/14	32/238	0.3799
1	ARS-BFGL-NGS-1797	19040936	1	0.1429	0.1919	2	0.6283	0.7019		1	ARS-BFGL-NGS-1797	1	2	DOM	4/10	90/181	1		1	ARS-BFGL-NGS-1797	1	2	REC	0/14	14/257	1
1	Hapmap47551-BTA-25902	19086376	2	0.2857	0.2852	1	1	1.003		1	Hapmap47551-BTA-25902	2	1	DOM	7/7	135/135	1		1	Hapmap47551-BTA-25902	2	1	REC	1/13	19/251	1
1	BTA-120923-no-rs	19161658	2	0.07143	0.2732	1	0.01509	0.2046		1	BTA-120923-no-rs	2	1	DOM	2/12	135/134	0.01146		1	BTA-120923-no-rs	2	1	REC	0/14	12/257	1
1	BTA-26174-no-rs	19232342	2	0.2857	0.2907	1	1	0.9758		1	BTA-26174-no-rs	2	1	DOM	7/7	137/133	1		1	BTA-26174-no-rs	2	1	REC	1/13	20/250	1
1	ARS-BFGL-NGS-111605	19266922	1	0.6429	0.4465	2	0.05133	2.231		1	ARS-BFGL-NGS-111605	1	2	DOM	13/1	184/87	0.07129		1	ARS-BFGL-NGS-111605	1	2	REC	5/9	58/213	0.2015
1	ARS-BFGL-NGS-94650	19417856	2	0.2857	0.1778	1	0.2054	1.85		1	ARS-BFGL-NGS-94650	2	1	DOM	8/6	93/177	0.09334		1	ARS-BFGL-NGS-94650	2	1	REC	0/14	3/267	1
1	BovineHD0100005653	19448177	1	0.3929	0.4943	2	0.3357	0.6619		1	BovineHD0100005653	1	2	DOM	9/5	207/58	0.3207		1	BovineHD0100005653	1	2	REC	2/12	55/210	0.742
1	ARS-BFGL-NGS-7429	19455564	1	0.2857	0.3783	2	0.4236	0.6574		1	ARS-BFGL-NGS-7429	1	2	DOM	6/8	167/100	0.1638		1	ARS-BFGL-NGS-7429	1	2	REC	2/12	35/232	1
1	BTA-39405-no-rs	19485982	1	0.2857	0.1922	2	0.2262	1.682		1	BTA-39405-no-rs	1	2	DOM	8/6	98/170	0.1574		1	BTA-39405-no-rs	1	2	REC	0/14	5/263	1
1	BovineHD0100005688	19507076	2	0.3846	0.3629	1	0.8365	1.097		1	BovineHD0100005688	2	1	DOM	8/5	163/96	1		1	BovineHD0100005688	2	1	REC	2/11	25/234	0.6254
1	BovineHD0100005700	19560010	1	0.1538	0.4045	2	0.0123	0.2677		1	BovineHD0100005700	1	2	DOM	4/9	173/94	0.01793		1	BovineHD0100005700	1	2	REC	0/13	43/224	0.2298
1	BovineHD0100005713	19629594	1	0.2308	0.3421	2	0.2921	0.5769		1	BovineHD0100005713	1	2	DOM	5/8	157/109	0.1598		1	BovineHD0100005713	1	2	REC	1/12	25/241	1
1	ARS-BFGL-NGS-29732	19691110	1	0.4643	0.4889	2	0.8481	0.9059		1	ARS-BFGL-NGS-29732	1	2	DOM	12/2	201/70	0.5294		1	ARS-BFGL-NGS-29732	1	2	REC	1/13	64/207	0.2024
1	BovineHD0100005771	19903346	1	0.3846	0.2996	2	0.3846	1.461		1	BovineHD0100005771	1	2	DOM	8/5	137/130	0.5752		1	BovineHD0100005771	1	2	REC	2/11	23/244	0.3263
1	BovineHD0100005782	19928368	2	0.3846	0.4655	1	0.5463	0.7176		1	BovineHD0100005782	2	1	DOM	9/4	187/74	1		1	BovineHD0100005782	2	1	REC	1/12	56/205	0.3142
1	Hapmap38278-BTA-104803	19938721	2	0	0.01661	1	1	0		1	Hapmap38278-BTA-104803	2	1	DOM	0/14	9/262	1		1	Hapmap38278-BTA-104803	2	1	REC	0/14	0/271	1
1	BovineHD0100005789	19957793	1	0.4643	0.412	2	0.6946	1.237		1	BovineHD0100005789	1	2	DOM	12/2	176/91	0.1536		1	BovineHD0100005789	1	2	REC	1/13	44/223	0.7061
1	BovineHD0100005800	20008856	1	0.4615	0.2816	2	0.07354	2.187		1	BovineHD0100005800	1	2	DOM	11/2	133/128	0.02156		1	BovineHD0100005800	1	2	REC	1/12	14/247	0.5271
1	BovineHD0100005805	20026148	2	0.2143	0.3893	1	0.07302	0.4278		1	BovineHD0100005805	2	1	DOM	6/8	182/89	0.08168		1	BovineHD0100005805	2	1	REC	0/14	29/242	0.3745
1	BovineHD0100005816	20073891	1	0.4615	0.2973	2	0.08359	2.025		1	BovineHD0100005816	1	2	DOM	11/2	140/124	0.04201		1	BovineHD0100005816	1	2	REC	1/12	17/247	0.5908
1	BTA-119061-no-rs	20099965	1	0.1429	0.0738	2	0.2613	2.092		1	BTA-119061-no-rs	1	2	DOM	4/10	40/231	0.2434		1	BTA-119061-no-rs	1	2	REC	0/14	0/271	1
1	UA-IFASA-3994	20175310	1	0.3214	0.2204	2	0.2446	1.676		1	UA-IFASA-3994	1	2	DOM	9/5	109/161	0.0967		1	UA-IFASA-3994	1	2	REC	0/14	10/260	1
1	BovineHD0100005852	20214044	2	0.3077	0.2256	1	0.3415	1.526		1	BovineHD0100005852	2	1	DOM	8/5	109/157	0.1598		1	BovineHD0100005852	2	1	REC	0/13	11/255	1
1	ARS-BFGL-BAC-11750	20285787	2	0.4643	0.2878	1	0.05611	2.144		1	ARS-BFGL-BAC-11750	2	1	DOM	12/2	141/130	0.01399		1	ARS-BFGL-BAC-11750	2	1	REC	1/13	15/256	0.5633
1	Hapmap51222-BTA-39456	20312624	1	0.4643	0.4907	2	0.8477	0.8995		1	Hapmap51222-BTA-39456	1	2	DOM	12/2	200/69	0.5291		1	Hapmap51222-BTA-39456	1	2	REC	1/13	64/205	0.2016
1	BovineHD0100005901	20320335	2	0.1538	0.1307	1	0.7647	1.209		1	BovineHD0100005901	2	1	DOM	4/9	68/196	0.7473		1	BovineHD0100005901	2	1	REC	0/13	1/263	1
1	ARS-BFGL-NGS-34218	20336514	2	0.5	0.4	1	0.3262	1.5		1	ARS-BFGL-NGS-34218	2	1	DOM	12/2	175/90	0.1541		1	ARS-BFGL-NGS-34218	2	1	REC	2/12	37/228	1
1	Hapmap51978-BTA-39455	20362107	1	0.1071	0.3007	2	0.03138	0.279		1	Hapmap51978-BTA-39455	1	2	DOM	3/11	142/129	0.02852		1	Hapmap51978-BTA-39455	1	2	REC	0/14	21/250	0.6093
1	BovineHD0100005920	20416935	1	0.4615	0.4034	2	0.5479	1.268		1	BovineHD0100005920	1	2	DOM	8/5	170/94	1		1	BovineHD0100005920	1	2	REC	4/9	43/221	0.2452
1	BovineHD0100005928	20440130	2	0.5357	0.476	1	0.5658	1.27		1	BovineHD0100005928	2	1	DOM	10/4	191/80	1		1	BovineHD0100005928	2	1	REC	5/9	67/204	0.3539
1	BovineHD0100005950	20541415	2	0.3846	0.3665	1	0.8379	1.08		1	BovineHD0100005950	2	1	DOM	9/4	156/110	0.5693		1	BovineHD0100005950	2	1	REC	1/12	39/227	0.7004
1	ARS-BFGL-NGS-116430	20588929	2	0.3571	0.2926	1	0.5245	1.343		1	ARS-BFGL-NGS-116430	2	1	DOM	8/6	143/127	0.7914		1	ARS-BFGL-NGS-116430	2	1	REC	2/12	15/255	0.2008
1	BovineHD0100005970	20601715	2	0	0.1154	1	0.0992	0		1	BovineHD0100005970	2	1	DOM	0/13	59/201	0.07765		1	BovineHD0100005970	2	1	REC	0/13	1/259	1
1	BovineHD0100005989	20653453	2	0.3846	0.4682	1	0.4288	0.71		1	BovineHD0100005989	2	1	DOM	8/5	197/70	0.3436		1	BovineHD0100005989	2	1	REC	2/11	53/214	1
1	Hapmap49594-BTA-39447	20667934	2	0.03571	0.1421	1	0.1563	0.2237		1	Hapmap49594-BTA-39447	2	1	DOM	1/13	75/196	0.1227		1	Hapmap49594-BTA-39447	2	1	REC	0/14	2/269	1
1	ARS-BFGL-BAC-15578	20694788	2	0	0.02214	1	1	0		1	ARS-BFGL-BAC-15578	2	1	DOM	0/14	12/259	1		1	ARS-BFGL-BAC-15578	2	1	REC	0/14	0/271	1
1	ARS-BFGL-NGS-10334	20716311	1	0.3929	0.4389	2	0.6989	0.8273		1	ARS-BFGL-NGS-10334	1	2	DOM	9/5	192/78	0.559		1	ARS-BFGL-NGS-10334	1	2	REC	2/12	45/225	1
1	BovineHD0100006007	20731028	1	0.4615	0.3853	2	0.5372	1.367		1	BovineHD0100006007	1	2	DOM	11/2	174/92	0.2304		1	BovineHD0100006007	1	2	REC	1/12	31/235	1
1	BovineHD0100006010	20744177	2	0.2308	0.3726	1	0.2095	0.5052		1	BovineHD0100006010	2	1	DOM	6/7	165/94	0.2431		1	BovineHD0100006010	2	1	REC	0/13	28/231	0.3737
1	BovineHD0100006021	20780052	1	0.07143	0.2804	2	0.01476	0.1974		1	BovineHD0100006021	1	2	DOM	2/12	136/135	0.01147		1	BovineHD0100006021	1	2	REC	0/14	16/255	1
1	BTA-39438-no-rs	20799206	2	0.07143	0.203	1	0.1389	0.3021		1	BTA-39438-no-rs	2	1	DOM	2/12	104/167	0.08965		1	BTA-39438-no-rs	2	1	REC	0/14	6/265	1
1	Hapmap28298-BTA-123775	20845227	2	0.6429	0.4813	1	0.1206	1.94		1	Hapmap28298-BTA-123775	2	1	DOM	11/3	203/65	1		1	Hapmap28298-BTA-123775	2	1	REC	7/7	55/213	0.01686
1	Hapmap28872-BTA-162555	20921794	2	0.07143	0.2638	1	0.02409	0.2146		1	Hapmap28872-BTA-162555	2	1	DOM	2/12	130/141	0.01399		1	Hapmap28872-BTA-162555	2	1	REC	0/14	13/258	1
1	BTA-116769-no-rs	20960607	2	0.6071	0.4123	1	0.04982	2.203		1	BTA-116769-no-rs	2	1	DOM	13/1	180/88	0.07187		1	BTA-116769-no-rs	2	1	REC	4/10	41/227	0.2504
1	Hapmap52794-rs29023743	21005976	2	0.3571	0.2889	1	0.5225	1.368		1	Hapmap52794-rs29023743	2	1	DOM	8/6	141/129	0.789		1	Hapmap52794-rs29023743	2	1	REC	2/12	15/255	0.2008
1	BovineHD0100006078	21055167	1	0.2308	0.3102	2	0.5148	0.6673		1	BovineHD0100006078	1	2	DOM	6/7	143/123	0.7772		1	BovineHD0100006078	1	2	REC	0/13	22/244	0.6085
1	Hapmap54489-rs29018413	21096522	2	0.07143	0.1956	1	0.1366	0.3164		1	Hapmap54489-rs29018413	2	1	DOM	2/12	101/170	0.09349		1	Hapmap54489-rs29018413	2	1	REC	0/14	5/266	1
1	Hapmap60044-rs29010295	21136787	2	0.2143	0.3542	1	0.1561	0.4972		1	Hapmap60044-rs29010295	2	1	DOM	6/8	164/107	0.2637		1	Hapmap60044-rs29010295	2	1	REC	0/14	28/243	0.3747
1	Hapmap26189-BTA-157760	21178292	2	0.1429	0.1089	1	0.5365	1.364		1	Hapmap26189-BTA-157760	2	1	DOM	4/10	58/213	0.513		1	Hapmap26189-BTA-157760	2	1	REC	0/14	1/270	1
1	ARS-BFGL-NGS-68915	21199202	1	0.3214	0.2934	2	0.8319	1.141		1	ARS-BFGL-NGS-68915	1	2	DOM	8/6	135/136	0.7852		1	ARS-BFGL-NGS-68915	1	2	REC	1/13	24/247	1
1	UA-IFASA-1500	21277546	2	0.4643	0.3598	1	0.3145	1.542		1	UA-IFASA-1500	2	1	DOM	11/3	163/108	0.2608		1	UA-IFASA-1500	2	1	REC	2/12	32/239	0.677
1	UA-IFASA-9700	21310574	2	0.3214	0.2915	1	0.8315	1.151		1	UA-IFASA-9700	2	1	DOM	8/6	135/136	0.7852		1	UA-IFASA-9700	2	1	REC	1/13	23/248	1
1	Hapmap39987-BTA-25749	21358879	1	0.4643	0.4077	2	0.5605	1.259		1	Hapmap39987-BTA-25749	1	2	DOM	11/3	175/96	0.3924		1	Hapmap39987-BTA-25749	1	2	REC	2/12	46/225	1
1	BovineHD0100006201	21422169	2	0.1071	0.3487	1	0.00709	0.2241		1	BovineHD0100006201	2	1	DOM	3/11	162/109	0.009721		1	BovineHD0100006201	2	1	REC	0/14	27/244	0.3759
1	ARS-BFGL-NGS-41203	21457294	2	0.3929	0.4188	1	0.8463	0.8979		1	ARS-BFGL-NGS-41203	2	1	DOM	9/5	181/90	1		1	ARS-BFGL-NGS-41203	2	1	REC	2/12	46/225	1
1	Hapmap49929-BTA-24619	21533511	1	0.3929	0.4613	2	0.5616	0.7558		1	Hapmap49929-BTA-24619	1	2	DOM	9/5	198/73	0.5398		1	Hapmap49929-BTA-24619	1	2	REC	2/12	52/219	1
1	BovineHD0100006241	21565267	2	0.1786	0.1222	1	0.3772	1.561		1	BovineHD0100006241	2	1	DOM	5/9	63/207	0.3346		1	BovineHD0100006241	2	1	REC	0/14	3/267	1
1	BovineHD0100006242	21574750	2	0.2857	0.2528	1	0.6613	1.182		1	BovineHD0100006242	2	1	DOM	8/6	124/147	0.425		1	BovineHD0100006242	2	1	REC	0/14	13/258	1
1	BovineHD0100006253	21599174	2	0.5714	0.4294	1	0.1715	1.772		1	BovineHD0100006253	2	1	DOM	11/3	189/80	0.7641		1	BovineHD0100006253	2	1	REC	5/9	42/227	0.06316
1	ARS-BFGL-NGS-100534	21646634	1	0.4286	0.2952	2	0.1427	1.791		1	ARS-BFGL-NGS-100534	1	2	DOM	10/4	142/129	0.1825		1	ARS-BFGL-NGS-100534	1	2	REC	2/12	18/253	0.2565
1	BovineHD0100006280	21662722	1	0.5	0.4315	2	0.5587	1.318		1	BovineHD0100006280	1	2	DOM	11/3	187/83	0.5632		1	BovineHD0100006280	1	2	REC	3/11	46/224	0.7154
1	BovineHD0100006290	21691443	1	0.07143	0.3426	2	0.00168	0.1476		1	BovineHD0100006290	1	2	DOM	2/12	155/115	0.001792		1	BovineHD0100006290	1	2	REC	0/14	30/240	0.3754
1	Hapmap53902-rs29027390	21725158	1	0.5714	0.3506	2	0.02509	2.47		1	Hapmap53902-rs29027390	1	2	DOM	12/2	158/113	0.05059		1	Hapmap53902-rs29027390	1	2	REC	4/10	32/239	0.08492
1	BovineHD0100006309	21744486	2	0.3571	0.3537	1	1	1.015		1	BovineHD0100006309	2	1	DOM	8/6	161/109	1		1	BovineHD0100006309	2	1	REC	2/12	30/240	0.6629
1	BovineHD0100006311	21750572	1	0.1786	0.1718	2	1	1.048		1	BovineHD0100006311	1	2	DOM	5/9	81/181	0.7691		1	BovineHD0100006311	1	2	REC	0/14	9/253	1
1	BTB-01332122	21764241	1	0.3571	0.3469	2	1	1.046		1	BTB-01332122	1	2	DOM	8/6	158/113	1		1	BTB-01332122	1	2	REC	2/12	30/241	0.6621
1	BovineHD0100006326	21792273	1	0.4643	0.3926	2	0.5528	1.341		1	BovineHD0100006326	1	2	DOM	9/5	170/100	1		1	BovineHD0100006326	1	2	REC	4/10	42/228	0.2541
1	BTB-01210202	21828827	2	0	0.02214	1	1	0		1	BTB-01210202	2	1	DOM	0/14	12/259	1		1	BTB-01210202	2	1	REC	0/14	0/271	1
1	BovineHD0100006343	21849432	2	0.3214	0.4291	1	0.3279	0.6302		1	BovineHD0100006343	2	1	DOM	8/6	176/92	0.5691		1	BovineHD0100006343	2	1	REC	1/13	54/214	0.3172
1	BovineHD0100006365	21909852	2	0.1429	0.1852	1	0.8021	0.7333		1	BovineHD0100006365	2	1	DOM	4/10	89/181	1		1	BovineHD0100006365	2	1	REC	0/14	11/259	1
1	BTB-01210232	21927942	2	0	0.02952	1	1	0		1	BTB-01210232	2	1	DOM	0/14	16/255	1		1	BTB-01210232	2	1	REC	0/14	0/271	1
1	BTB-01116114	22034195	2	0.1786	0.3192	1	0.1445	0.4637		1	BTB-01116114	2	1	DOM	5/9	148/123	0.1818		1	BTB-01116114	2	1	REC	0/14	25/246	0.6204
1	BovineHD0100006395	22053575	2	0.03571	0.1352	1	0.1569	0.2369		1	BovineHD0100006395	2	1	DOM	1/13	70/200	0.2013		1	BovineHD0100006395	2	1	REC	0/14	3/267	1
1	BovineHD0100006403	22090208	2	0.03571	0.2199	1	0.01616	0.1314		1	BovineHD0100006403	2	1	DOM	1/13	103/163	0.02046		1	BovineHD0100006403	2	1	REC	0/14	14/252	1
1	BovineHD0100006405	22101301	2	0.1786	0.2041	1	1	0.8476		1	BovineHD0100006405	2	1	DOM	5/9	101/166	1		1	BovineHD0100006405	2	1	REC	0/14	8/259	1
1	BovineHD0100006407	22106567	1	0.1786	0.2698	2	0.3811	0.5883		1	BovineHD0100006407	1	2	DOM	5/9	127/138	0.4218		1	BovineHD0100006407	1	2	REC	0/14	16/249	1
1	Hapmap42716-BTA-88423	22125251	1	0	0.06827	2	0.2455	0		1	Hapmap42716-BTA-88423	1	2	DOM	0/14	36/235	0.2289		1	Hapmap42716-BTA-88423	1	2	REC	0/14	1/270	1
1	BTB-01897472	22210184	2	0.3214	0.4963	1	0.08209	0.4807		1	BTB-01897472	2	1	DOM	6/8	203/68	0.01326		1	BTB-01897472	2	1	REC	3/11	66/205	1
1	BTA-07140-rs29026807	22267765	2	0	0.05351	1	0.3881	0		1	BTA-07140-rs29026807	2	1	DOM	0/14	29/242	0.3745		1	BTA-07140-rs29026807	2	1	REC	0/14	0/271	1
1	BovineHD0100006446	22274799	1	0	0.06391	2	0.403	0		1	BovineHD0100006446	1	2	DOM	0/14	34/232	0.2308		1	BovineHD0100006446	1	2	REC	0/14	0/266	1
1	BovineHD0100006466	22338247	2	0.25	0.4326	1	0.07608	0.4372		1	BovineHD0100006466	2	1	DOM	7/7	191/76	0.1284		1	BovineHD0100006466	2	1	REC	0/14	40/227	0.2317
1	ARS-BFGL-NGS-51361	22359893	2	0.2143	0.2804	1	0.5224	0.6998		1	ARS-BFGL-NGS-51361	2	1	DOM	6/8	131/140	0.7875		1	ARS-BFGL-NGS-51361	2	1	REC	0/14	21/250	0.6093
1	ARS-BFGL-BAC-15637	22421404	2	0.03571	0.1052	1	0.3441	0.3151		1	ARS-BFGL-BAC-15637	2	1	DOM	1/13	56/215	0.3151		1	ARS-BFGL-BAC-15637	2	1	REC	0/14	1/270	1
1	BovineHD0100006497	22430817	1	0.2143	0.2755	2	0.6632	0.7173		1	BovineHD0100006497	1	2	DOM	6/8	126/139	0.7896		1	BovineHD0100006497	1	2	REC	0/14	20/245	0.6086
1	UA-IFASA-9053	22459664	2	0.03571	0.1162	1	0.3504	0.2816		1	UA-IFASA-9053	2	1	DOM	1/13	59/212	0.3141		1	UA-IFASA-9053	2	1	REC	0/14	4/267	1
1	BovineHD0100006515	22504689	2	0.1071	0.2753	1	0.05041	0.3159		1	BovineHD0100006515	2	1	DOM	3/11	134/133	0.05237		1	BovineHD0100006515	2	1	REC	0/14	13/254	1
1	ARS-BFGL-NGS-117957	22525457	1	0.75	0.4797	2	0.0061	3.254		1	ARS-BFGL-NGS-117957	1	2	DOM	14/0	201/70	0.02502		1	ARS-BFGL-NGS-117957	1	2	REC	7/7	59/212	0.02265
1	BTB-00010729	22568717	2	0	0.09779	1	0.09734	0		1	BTB-00010729	2	1	DOM	0/14	49/222	0.1386		1	BTB-00010729	2	1	REC	0/14	4/267	1
1	BovineHD0100006555	22591077	1	0.1071	0.3502	2	0.007011	0.2227		1	BovineHD0100006555	1	2	DOM	3/11	161/106	0.005098		1	BovineHD0100006555	1	2	REC	0/14	26/241	0.377
1	BTA-59229-no-rs	22604778	1	0	0.07778	2	0.2542	0		1	BTA-59229-no-rs	1	2	DOM	0/14	39/231	0.2293		1	BTA-59229-no-rs	1	2	REC	0/14	3/267	1
1	BovineHD0100006562	22622795	2	0.3571	0.3875	1	0.8436	0.8783		1	BovineHD0100006562	2	1	DOM	7/7	169/102	0.4033		1	BovineHD0100006562	2	1	REC	3/11	41/230	0.4601
1	BovineHD0100006581	22659683	1	0.4643	0.3764	2	0.4251	1.436		1	BovineHD0100006581	1	2	DOM	10/4	169/102	0.5812		1	BovineHD0100006581	1	2	REC	3/11	35/236	0.4103
1	ARS-BFGL-NGS-118519	22681024	2	0.25	0.3782	1	0.2289	0.548		1	ARS-BFGL-NGS-118519	2	1	DOM	7/7	172/99	0.3962		1	ARS-BFGL-NGS-118519	2	1	REC	0/14	33/238	0.383
1	BovineHD0100006599	22777886	2	0	0.04815	1	0.6317	0		1	BovineHD0100006599	2	1	DOM	0/14	26/244	0.6253		1	BovineHD0100006599	2	1	REC	0/14	0/270	1
1	BTA-120720-no-rs	22901046	2	0.5	0.4742	1	0.8475	1.109		1	BTA-120720-no-rs	2	1	DOM	10/4	199/72	1		1	BTA-120720-no-rs	2	1	REC	4/10	58/213	0.513
1	BTB-00011076	23001427	2	0.3929	0.5037	1	0.3328	0.6376		1	BTB-00011076	2	1	DOM	11/3	204/67	1		1	BTB-00011076	2	1	REC	0/14	69/202	0.02551
1	BovineHD0100006669	23080610	2	0.2857	0.2528	1	0.6613	1.182		1	BovineHD0100006669	2	1	DOM	8/6	124/147	0.425		1	BovineHD0100006669	2	1	REC	0/14	13/258	1
1	BTB-02025707	23125028	1	0.4643	0.3542	2	0.3122	1.58		1	BTB-02025707	1	2	DOM	9/5	163/108	1		1	BTB-02025707	1	2	REC	4/10	29/242	0.06459
1	BovineHD0100006687	23140537	2	0.1786	0.1364	1	0.5714	1.377		1	BovineHD0100006687	2	1	DOM	5/9	68/196	0.5324		1	BovineHD0100006687	2	1	REC	0/14	4/260	1
1	BTB-01548042	23214124	1	0.3214	0.2491	2	0.3787	1.428		1	BTB-01548042	1	2	DOM	8/6	123/148	0.4217		1	BTB-01548042	1	2	REC	1/13	12/259	0.488
1	BTB-01438016	23317578	1	0.03571	0.1511	2	0.1034	0.208		1	BTB-01438016	1	2	DOM	1/13	75/193	0.1222		1	BTB-01438016	1	2	REC	0/14	6/262	1
1	BovineHD0100006735	23335758	1	0.3571	0.3948	2	0.8432	0.8515		1	BovineHD0100006735	1	2	DOM	9/5	175/96	1		1	BovineHD0100006735	1	2	REC	1/13	39/232	0.7005
1	BTB-01562871	23382846	2	0.1786	0.2556	1	0.5031	0.6333		1	BTB-01562871	2	1	DOM	5/9	122/148	0.5874		1	BTB-01562871	2	1	REC	0/14	16/254	1
1	BovineHD0100006749	23404797	2	0.03571	0.1629	1	0.1041	0.1903		1	BovineHD0100006749	2	1	DOM	1/13	80/187	0.07461		1	BovineHD0100006749	2	1	REC	0/14	7/260	1
1	BovineHD0100006765	23451433	2	0.4286	0.4135	1	1	1.064		1	BovineHD0100006765	2	1	DOM	10/4	182/84	1		1	BovineHD0100006765	2	1	REC	2/12	38/228	1
1	ARS-BFGL-NGS-97225	23477787	1	0.4286	0.1919	2	0.006081	3.159		1	ARS-BFGL-NGS-97225	1	2	DOM	10/4	96/175	0.009579		1	ARS-BFGL-NGS-97225	1	2	REC	2/12	8/263	0.08052
1	BovineHD0100006803	23554870	1	0.25	0.2838	2	0.8309	0.8411		1	BovineHD0100006803	1	2	DOM	6/8	137/129	0.5913		1	BovineHD0100006803	1	2	REC	1/13	14/252	0.5461
1	ARS-BFGL-NGS-29682	23661806	2	0.3571	0.4354	1	0.4418	0.7203		1	ARS-BFGL-NGS-29682	2	1	DOM	7/7	186/85	0.1539		1	ARS-BFGL-NGS-29682	2	1	REC	3/11	50/221	0.7292
1	BTB-01153392	23709011	2	0.25	0.1033	1	0.02599	2.893		1	BTB-01153392	2	1	DOM	6/8	52/219	0.04308		1	BTB-01153392	2	1	REC	1/13	4/267	0.2241
1	BovineHD0100006868	23712951	2	0.25	0.3308	1	0.417	0.6742		1	BovineHD0100006868	2	1	DOM	5/9	147/119	0.1764		1	BovineHD0100006868	2	1	REC	2/12	29/237	0.6588
1	BTB-01153206	23747154	2	0.2143	0.4114	1	0.04702	0.3901		1	BTB-01153206	2	1	DOM	6/8	176/95	0.1506		1	BTB-01153206	2	1	REC	0/14	47/224	0.1367
1	BovineHD0100006883	23775870	1	0.25	0.1365	2	0.09907	2.108		1	BovineHD0100006883	1	2	DOM	6/8	68/203	0.2063		1	BovineHD0100006883	1	2	REC	1/13	6/265	0.2998
1	BTB-01153241	23797034	1	0.5357	0.4926	2	0.7015	1.188		1	BTB-01153241	1	2	DOM	10/4	198/73	1		1	BTB-01153241	1	2	REC	5/9	69/202	0.3663
1	Hapmap32844-BTA-151959	23863105	1	0.2143	0.2749	2	0.6633	0.7193		1	Hapmap32844-BTA-151959	1	2	DOM	5/9	132/139	0.4172		1	Hapmap32844-BTA-151959	1	2	REC	1/13	17/254	0.6077
1	BovineHD0100006928	23904271	2	0	0.05283	1	0.3877	0		1	BovineHD0100006928	2	1	DOM	0/14	28/237	0.3742		1	BovineHD0100006928	2	1	REC	0/14	0/265	1
1	BovineHD0100006929	23905003	2	0	0.05283	1	0.3877	0		1	BovineHD0100006929	2	1	DOM	0/14	28/237	0.3742		1	BovineHD0100006929	2	1	REC	0/14	0/265	1
1	BTB-01885509	23916098	1	0.2143	0.3333	2	0.2205	0.5455		1	BTB-01885509	1	2	DOM	4/10	153/117	0.05272		1	BTB-01885509	1	2	REC	2/12	27/243	0.6424
1	BovineHD0100006936	23918911	1	0.3929	0.2528	2	0.1205	1.913		1	BovineHD0100006936	1	2	DOM	8/6	123/148	0.4217		1	BovineHD0100006936	1	2	REC	3/11	14/257	0.0427
1	BovineHD0100006920	23943176	2	0.25	0.3278	1	0.5348	0.6836		1	BovineHD0100006920	2	1	DOM	5/9	149/121	0.177		1	BovineHD0100006920	2	1	REC	2/12	28/242	0.6489
1	BTB-01821892	23946108	2	0.1786	0.3081	1	0.2042	0.4882		1	BTB-01821892	2	1	DOM	5/9	145/126	0.2729		1	BTB-01821892	2	1	REC	0/14	22/249	0.6108
1	BovineHD0100006946	23970626	2	0.1786	0.2823	1	0.2835	0.5527		1	BovineHD0100006946	2	1	DOM	5/9	134/137	0.4141		1	BovineHD0100006946	2	1	REC	0/14	19/252	0.6091
1	ARS-BFGL-BAC-16283	23977117	1	0.1071	0.1896	2	0.452	0.5129		1	ARS-BFGL-BAC-16283	1	2	DOM	3/11	93/176	0.3952		1	ARS-BFGL-BAC-16283	1	2	REC	0/14	9/260	1
1	BTB-00008466	23998494	2	0.3214	0.3414	1	1	0.9137		1	BTB-00008466	2	1	DOM	7/7	151/117	0.7839		1	BTB-00008466	2	1	REC	2/12	32/236	0.6798
1	BovineHD0100006952	24003791	2	0.4643	0.4453	1	0.848	1.08		1	BovineHD0100006952	2	1	DOM	10/4	182/83	1		1	BovineHD0100006952	2	1	REC	3/11	54/211	1
1	BovineHD0100006959	24044449	1	0.4643	0.3284	2	0.1527	1.772		1	BovineHD0100006959	1	2	DOM	10/4	148/123	0.2758		1	BovineHD0100006959	1	2	REC	3/11	30/241	0.212
1	Hapmap60828-rs29019992	24099198	2	0.07143	0.2103	1	0.09137	0.2888		1	Hapmap60828-rs29019992	2	1	DOM	2/12	107/164	0.08799		1	Hapmap60828-rs29019992	2	1	REC	0/14	7/264	1
1	ARS-BFGL-NGS-110541	24136861	2	0.3214	0.4742	1	0.1243	0.5253		1	ARS-BFGL-NGS-110541	2	1	DOM	9/5	198/73	0.5398		1	ARS-BFGL-NGS-110541	2	1	REC	0/14	59/212	0.08227
1	ARS-BFGL-BAC-6737	24168476	2	0.25	0.2944	1	0.6768	0.7987		1	ARS-BFGL-BAC-6737	2	1	DOM	6/8	136/134	0.7852		1	ARS-BFGL-BAC-6737	2	1	REC	1/13	23/247	1
1	BovineHD0100006989	24193638	2	0.1071	0.1556	1	0.7866	0.6514		1	BovineHD0100006989	2	1	DOM	3/11	81/189	0.7645		1	BovineHD0100006989	2	1	REC	0/14	3/267	1
1	BTA-49259-no-rs	24222791	2	0.3571	0.2085	1	0.09484	2.109		1	BTA-49259-no-rs	2	1	DOM	8/6	104/167	0.1723		1	BTA-49259-no-rs	2	1	REC	2/12	9/262	0.09565
1	BovineHD0100007001	24250187	2	0.3929	0.2138	1	0.03511	2.38		1	BovineHD0100007001	2	1	DOM	10/4	105/164	0.02346		1	BovineHD0100007001	2	1	REC	1/13	10/259	0.4336
1	BTA-49269-no-rs	24280702	1	0.2143	0.3303	2	0.2224	0.5531		1	BTA-49269-no-rs	1	2	DOM	6/8	152/119	0.4118		1	BTA-49269-no-rs	1	2	REC	0/14	27/244	0.3759
1	BovineHD0100007019	24308441	1	0.25	0.1863	2	0.456	1.455		1	BovineHD0100007019	1	2	DOM	6/8	92/179	0.5668		1	BovineHD0100007019	1	2	REC	1/13	9/262	0.4007
1	BovineHD0100007023	24321697	1	0.2857	0.3891	2	0.3226	0.628		1	BovineHD0100007023	1	2	DOM	8/6	170/96	0.584		1	BovineHD0100007023	1	2	REC	0/14	37/229	0.228
1	BTB-01976950	24356429	2	0.1429	0.1199	1	0.7642	1.223		1	BTB-01976950	2	1	DOM	4/10	62/209	0.7448		1	BTB-01976950	2	1	REC	0/14	3/268	1
1	BovineHD0100007038	24374438	2	0.2857	0.2892	1	1	0.9832		1	BovineHD0100007038	2	1	DOM	8/6	137/131	0.7864		1	BovineHD0100007038	2	1	REC	0/14	18/250	0.6102
1	BovineHD0100007040	24382082	2	0.2857	0.3843	1	0.3254	0.6408		1	BovineHD0100007040	2	1	DOM	8/6	169/99	0.778		1	BovineHD0100007040	2	1	REC	0/14	37/231	0.228
1	BovineHD0100007049	24414918	1	0.5714	0.4336	2	0.1739	1.742		1	BovineHD0100007049	1	2	DOM	11/3	185/86	0.56		1	BovineHD0100007049	1	2	REC	5/9	50/221	0.1557
1	UA-IFASA-5116	24486748	2	0.1429	0.1531	1	1	0.9217		1	UA-IFASA-5116	2	1	DOM	4/10	80/191	1		1	UA-IFASA-5116	2	1	REC	0/14	3/268	1
1	BTB-00007882	24541288	1	0.25	0.3653	2	0.234	0.5791		1	BTB-00007882	1	2	DOM	7/7	158/113	0.5863		1	BTB-00007882	1	2	REC	0/14	40/231	0.2307
1	BovineHD0100007103	24562856	1	0.3214	0.3123	2	1	1.043		1	BovineHD0100007103	1	2	DOM	8/6	139/130	0.7875		1	BovineHD0100007103	1	2	REC	1/13	29/240	1
1	Hapmap52764-rs29022780	24625263	2	0.25	0.3026	1	0.6745	0.7683		1	Hapmap52764-rs29022780	2	1	DOM	7/7	141/130	1		1	Hapmap52764-rs29022780	2	1	REC	0/14	23/248	0.6132
1	BTB-00008090	24677050	2	0	0.1407	1	0.02315	0		1	BTB-00008090	2	1	DOM	0/14	71/199	0.02458		1	BTB-00008090	2	1	REC	0/14	5/265	1
1	BovineHD0100007162	24715129	2	0	0.1716	1	0.008344	0		1	BovineHD0100007162	2	1	DOM	0/14	81/190	0.01268		1	BovineHD0100007162	2	1	REC	0/14	12/259	1
1	BovineHD0100007166	24727812	1	0.07143	0.2778	2	0.0148	0.2		1	BovineHD0100007166	1	2	DOM	2/12	128/142	0.02441		1	BovineHD0100007166	1	2	REC	0/14	22/248	0.6109
1	BTA-49236-no-rs	24736398	2	0.07143	0.04797	1	0.6414	1.527		1	BTA-49236-no-rs	2	1	DOM	2/12	26/245	0.6357		1	BTA-49236-no-rs	2	1	REC	0/14	0/271	1
1	BTB-00008277	24758865	1	0.07143	0.05597	2	0.6684	1.297		1	BTB-00008277	1	2	DOM	2/12	29/239	0.6573		1	BTB-00008277	1	2	REC	0/14	1/267	1
1	BovineHD0100007185	24765640	1	0.5417	0.4904	2	0.6797	1.228		1	BovineHD0100007185	1	2	DOM	9/3	194/66	1		1	BovineHD0100007185	1	2	REC	4/8	61/199	0.4889
1	Hapmap52220-rs29016259	24782983	2	0.3929	0.3579	1	0.6915	1.161		1	Hapmap52220-rs29016259	2	1	DOM	8/6	161/110	1		1	Hapmap52220-rs29016259	2	1	REC	3/11	33/238	0.3975
1	BTA-49243-no-rs	24819532	2	0.3929	0.3685	1	0.8419	1.109		1	BTA-49243-no-rs	2	1	DOM	8/6	161/109	1		1	BTA-49243-no-rs	2	1	REC	3/11	38/232	0.4346
1	BTA-15153-rs29026518	24841162	1	0.03571	0.03903	2	1	0.9118		1	BTA-15153-rs29026518	1	2	DOM	1/13	21/248	1		1	BTA-15153-rs29026518	1	2	REC	0/14	0/269	1
1	BovineHD0100007225	24901336	1	0.4167	0.483	2	0.5403	0.7645		1	BovineHD0100007225	1	2	DOM	10/2	196/69	0.7366		1	BovineHD0100007225	1	2	REC	0/12	60/205	0.07534
1	BovineHD0100007238	24964189	1	0	0.1546	2	0.03567	0		1	BovineHD0100007238	1	2	DOM	0/12	76/186	0.04111		1	BovineHD0100007238	1	2	REC	0/12	5/257	1
1	BTB-00014074	24984897	1	0.4286	0.4889	2	0.5663	0.784		1	BTB-00014074	1	2	DOM	11/3	203/68	1		1	BTB-00014074	1	2	REC	1/13	62/209	0.3178
1	ARS-BFGL-BAC-11218	25027851	1	0.25	0.2556	2	1	0.971		1	ARS-BFGL-BAC-11218	1	2	DOM	6/8	118/152	1		1	ARS-BFGL-BAC-11218	1	2	REC	1/13	20/250	1
1	BovineHD0100007277	25086040	1	0.3333	0.3365	2	1	0.986		1	BovineHD0100007277	1	2	DOM	7/5	151/115	1		1	BovineHD0100007277	1	2	REC	1/11	28/238	1
1	ARS-BFGL-NGS-19076	25126982	1	0.3571	0.487	2	0.2442	0.5851		1	ARS-BFGL-NGS-19076	1	2	DOM	10/4	199/71	0.7661		1	ARS-BFGL-NGS-19076	1	2	REC	0/14	64/206	0.04485
1	BovineHD0100007296	25144847	2	0	0.211	1	0.007236	0		1	BovineHD0100007296	2	1	DOM	0/12	97/166	0.009744		1	BovineHD0100007296	2	1	REC	0/12	14/249	1
1	chr1_24670381	25147117	1	0.07143	0.132	2	0.5616	0.506		1	chr1_24670381	1	2	DOM	2/12	64/205	0.5324		1	chr1_24670381	1	2	REC	0/14	7/262	1
1	BovineHD0100007305	25161217	1	0.25	0.3096	2	0.654	0.7433		1	BovineHD0100007305	1	2	DOM	6/6	133/127	1		1	BovineHD0100007305	1	2	REC	0/12	28/232	0.6195
1	BTB-00010532	25169655	1	0.2857	0.2778	2	1	1.04		1	BTB-00010532	1	2	DOM	7/7	131/139	1		1	BTB-00010532	1	2	REC	1/13	19/251	1
1	BovineHD0100007320	25216165	1	0.25	0.2643	2	1	0.9281		1	BovineHD0100007320	1	2	DOM	5/7	123/140	0.7761		1	BovineHD0100007320	1	2	REC	1/11	16/247	0.5425
1	BovineHD4100000146	25262463	2	0	0.02863	1	1	0		1	BovineHD4100000146	2	1	DOM	0/12	14/248	1		1	BovineHD4100000146	2	1	REC	0/12	1/261	1
1	Hapmap39274-BTA-49324	25283617	1	0.03571	0.262	2	0.005804	0.1043		1	Hapmap39274-BTA-49324	1	2	DOM	1/13	123/148	0.004498		1	Hapmap39274-BTA-49324	1	2	REC	0/14	19/252	0.6091
1	ARS-BFGL-NGS-115371	25316771	1	0.03571	0.2952	2	0.00185	0.08843		1	ARS-BFGL-NGS-115371	1	2	DOM	1/13	138/133	0.001496		1	ARS-BFGL-NGS-115371	1	2	REC	0/14	22/249	0.6108
1	BTB-00010021	25360826	1	0	0.1328	2	0.03739	0		1	BTB-00010021	1	2	DOM	0/14	69/202	0.02551		1	BTB-00010021	1	2	REC	0/14	3/268	1
1	BTA-49319-no-rs	25400262	1	0.25	0.25	2	1	1		1	BTA-49319-no-rs	1	2	DOM	6/8	116/154	1		1	BTA-49319-no-rs	1	2	REC	1/13	19/251	1
1	BovineHD0100007402	25480755	1	0.625	0.4885	2	0.2149	1.745		1	BovineHD0100007402	1	2	DOM	10/2	191/71	0.5253		1	BovineHD0100007402	1	2	REC	5/7	65/197	0.191
1	Hapmap53715-rs29017639	25482611	2	0.2143	0.1889	1	0.8044	1.171		1	Hapmap53715-rs29017639	2	1	DOM	5/9	90/180	1		1	Hapmap53715-rs29017639	2	1	REC	1/13	12/258	0.4892
1	BovineHD0100007407	25495578	1	0.625	0.4846	2	0.2125	1.772		1	BovineHD0100007407	1	2	DOM	10/2	189/71	0.5241		1	BovineHD0100007407	1	2	REC	5/7	63/197	0.1819
1	BTB-00009762	25511500	1	0.03571	0.1384	2	0.1561	0.2306		1	BTB-00009762	1	2	DOM	1/13	67/204	0.1997		1	BTB-00009762	1	2	REC	0/14	8/263	1
1	ARS-BFGL-NGS-82685	25550567	2	0.3214	0.2251	1	0.2509	1.631		1	ARS-BFGL-NGS-82685	2	1	DOM	9/5	110/161	0.09796		1	ARS-BFGL-NGS-82685	2	1	REC	0/14	12/259	1
1	BovineHD0100007439	25595556	1	0.2917	0.5	2	0.05925	0.4118		1	BovineHD0100007439	1	2	DOM	6/6	200/64	0.08137		1	BovineHD0100007439	1	2	REC	1/11	64/200	0.3053
1	BovineHD0100007449	25626372	1	0.6071	0.4815	2	0.2451	1.664		1	BovineHD0100007449	1	2	DOM	13/1	200/70	0.2013		1	BovineHD0100007449	1	2	REC	4/10	60/210	0.526
1	BTA-49289-no-rs	25651580	1	0.3214	0.3542	2	0.8404	0.8635		1	BTA-49289-no-rs	1	2	DOM	7/7	157/114	0.5888		1	BTA-49289-no-rs	1	2	REC	2/12	35/236	0.7005
1	BovineHD0100007477	25714088	1	0.08333	0.09811	2	1	0.8357		1	BovineHD0100007477	1	2	DOM	2/10	50/215	1		1	BovineHD0100007477	1	2	REC	0/12	2/263	1
1	BovineHD0100046406	25745106	1	0.2917	0.5056	2	0.05843	0.4026		1	BovineHD0100046406	1	2	DOM	6/6	203/63	0.07886		1	BovineHD0100046406	1	2	REC	1/11	66/200	0.3045
1	ARS-BFGL-BAC-13086	25786913	2	0.3571	0.4096	1	0.6946	0.8008		1	ARS-BFGL-BAC-13086	2	1	DOM	8/6	176/95	0.5746		1	ARS-BFGL-BAC-13086	2	1	REC	2/12	46/225	1
1	ARS-BFGL-NGS-34568	25819185	1	0	0.08672	2	0.1556	0		1	ARS-BFGL-NGS-34568	1	2	DOM	0/14	46/225	0.1364		1	ARS-BFGL-NGS-34568	1	2	REC	0/14	1/270	1
1	BovineHD0100007517	25881846	1	0.03571	0.08922	2	0.4988	0.3781		1	BovineHD0100007517	1	2	DOM	1/13	47/222	0.477		1	BovineHD0100007517	1	2	REC	0/14	1/268	1
1	BovineHD0100007518	25888342	1	0.1667	0.3467	2	0.0789	0.3768		1	BovineHD0100007518	1	2	DOM	4/8	150/111	0.1367		1	BovineHD0100007518	1	2	REC	0/12	31/230	0.3717
1	BTA-49283-no-rs	25923897	1	0.03571	0.1444	2	0.1571	0.2194		1	BTA-49283-no-rs	1	2	DOM	1/13	73/197	0.1243		1	BTA-49283-no-rs	1	2	REC	0/14	5/265	1
1	BovineHD0100007535	25987030	1	0.4286	0.3922	2	0.6965	1.162		1	BovineHD0100007535	1	2	DOM	9/5	166/103	1		1	BovineHD0100007535	1	2	REC	3/11	45/224	0.7129
1	ARS-BFGL-NGS-16145	26001083	2	0.2692	0.1907	1	0.3146	1.563		1	ARS-BFGL-NGS-16145	2	1	DOM	6/7	93/177	0.3876		1	ARS-BFGL-NGS-16145	2	1	REC	1/12	10/260	0.4096
1	BovineHD0100007541	26026329	1	0.1667	0.3377	2	0.1183	0.3922		1	BovineHD0100007541	1	2	DOM	4/8	147/118	0.1494		1	BovineHD0100007541	1	2	REC	0/12	32/233	0.3714
1	BTB-00009232	26105452	1	0.03571	0.1052	2	0.3441	0.3151		1	BTB-00009232	1	2	DOM	1/13	54/217	0.3186		1	BTB-00009232	1	2	REC	0/14	3/268	1
1	BovineHD0100007558	26124425	1	0.625	0.4886	2	0.215	1.744		1	BovineHD0100007558	1	2	DOM	10/2	193/70	0.7375		1	BovineHD0100007558	1	2	REC	5/7	64/199	0.1834
1	ARS-BFGL-NGS-20807	26144886	2	0.3214	0.3926	1	0.5527	0.7329		1	ARS-BFGL-NGS-20807	2	1	DOM	8/6	172/98	0.7769		1	ARS-BFGL-NGS-20807	2	1	REC	1/13	40/230	0.7006
1	BovineHD0100007577	26169638	2	0.07143	0.3086	1	0.005275	0.1724		1	BovineHD0100007577	2	1	DOM	2/12	139/130	0.0109		1	BovineHD0100007577	2	1	REC	0/14	27/242	0.3755
1	Hapmap26753-BTA-158146	26287535	2	0.2143	0.303	1	0.3997	0.6274		1	Hapmap26753-BTA-158146	2	1	DOM	5/9	133/136	0.4141		1	Hapmap26753-BTA-158146	2	1	REC	1/13	30/239	1
1	BovineHD0100007610	26300728	2	0.4583	0.3636	1	0.389	1.481		1	BovineHD0100007610	2	1	DOM	10/2	163/101	0.2208		1	BovineHD0100007610	2	1	REC	1/11	29/235	1
1	BovineHD0100007618	26336990	2	0.3333	0.2462	1	0.3393	1.531		1	BovineHD0100007618	2	1	DOM	7/5	115/149	0.3792		1	BovineHD0100007618	2	1	REC	1/11	15/249	0.5189
1	BovineHD0100007641	26411261	2	0.3846	0.3843	1	1	1.001		1	BovineHD0100007641	2	1	DOM	10/3	168/100	0.3855		1	BovineHD0100007641	2	1	REC	0/13	38/230	0.2271
1	BovineHD0100007647	26431102	2	0.3929	0.2472	1	0.1162	1.97		1	BovineHD0100007647	2	1	DOM	11/3	117/152	0.01254		1	BovineHD0100007647	2	1	REC	0/14	16/253	1
1	BovineHD0100007649	26436860	2	0.1071	0.223	1	0.2369	0.418		1	BovineHD0100007649	2	1	DOM	3/11	107/162	0.2607		1	BovineHD0100007649	2	1	REC	0/14	13/256	1
1	BovineHD0100007652	26452516	2	0.4167	0.3233	1	0.3759	1.495		1	BovineHD0100007652	2	1	DOM	10/2	146/120	0.07298		1	BovineHD0100007652	2	1	REC	0/12	26/240	0.6114
1	BovineHD0100007665	26505838	2	0.25	0.3401	1	0.4134	0.6466		1	BovineHD0100007665	2	1	DOM	7/7	158/111	0.5837		1	BovineHD0100007665	2	1	REC	0/14	25/244	0.6211
1	BovineHD0100007673	26521636	1	0.4583	0.4943	2	0.8356	0.8656		1	BovineHD0100007673	1	2	DOM	10/2	200/64	0.737		1	BovineHD0100007673	1	2	REC	1/11	61/203	0.3101
1	ARS-BFGL-NGS-50954	26559426	1	0.2143	0.2565	2	0.8241	0.7907		1	ARS-BFGL-NGS-50954	1	2	DOM	5/9	117/154	0.7831		1	ARS-BFGL-NGS-50954	1	2	REC	1/13	22/249	1
1	BovineHD0100007713	26609580	2	0.3333	0.3989	1	0.6704	0.7536		1	BovineHD0100007713	2	1	DOM	7/5	164/98	0.7681		1	BovineHD0100007713	2	1	REC	1/11	45/217	0.6973
1	BovineHD0100007728	26635591	2	0.3333	0.3264	1	1	1.032		1	BovineHD0100007728	2	1	DOM	7/5	145/120	1		1	BovineHD0100007728	2	1	REC	1/11	28/237	1
1	BovineHD0100007746	26681454	2	0.03571	0.07836	1	0.7138	0.4356		1	BovineHD0100007746	2	1	DOM	1/13	40/228	0.7007		1	BovineHD0100007746	2	1	REC	0/14	2/266	1
1	BovineHD0100007786	26776298	1	0.03571	0.08178	2	0.7165	0.4158		1	BovineHD0100007786	1	2	DOM	1/13	43/226	0.7037		1	BovineHD0100007786	1	2	REC	0/14	1/268	1
1	Hapmap50927-BTA-28806	26803778	1	0	0.08303	2	0.155	0		1	Hapmap50927-BTA-28806	1	2	DOM	0/14	44/227	0.1376		1	Hapmap50927-BTA-28806	1	2	REC	0/14	1/270	1
1	BovineHD0100007805	26837703	1	0.4167	0.3282	2	0.3808	1.462		1	BovineHD0100007805	1	2	DOM	10/2	145/117	0.07403		1	BovineHD0100007805	1	2	REC	0/12	27/235	0.6152
1	BovineHD0100007806	26839277	1	0.08333	0.05894	2	0.6487	1.452		1	BovineHD0100007806	1	2	DOM	2/10	31/232	0.6425		1	BovineHD0100007806	1	2	REC	0/12	0/263	1
1	BovineHD0100007822	26880560	2	0.07143	0.1338	1	0.5628	0.4979		1	BovineHD0100007822	2	1	DOM	2/12	69/200	0.5291		1	BovineHD0100007822	2	1	REC	0/14	3/266	1
1	BovineHD0100007825	26884051	1	0.07143	0.1362	2	0.5647	0.4879		1	BovineHD0100007825	1	2	DOM	2/12	71/197	0.531		1	BovineHD0100007825	1	2	REC	0/14	2/266	1
1	Hapmap59621-rs29013246	26889213	1	0.07143	0.06089	2	0.6872	1.186		1	Hapmap59621-rs29013246	1	2	DOM	2/12	33/238	0.6847		1	Hapmap59621-rs29013246	1	2	REC	0/14	0/271	1
1	ARS-BFGL-NGS-11151	26921328	1	0.6071	0.4317	2	0.07972	2.034		1	ARS-BFGL-NGS-11151	1	2	DOM	12/2	182/89	0.2384		1	ARS-BFGL-NGS-11151	1	2	REC	5/9	52/219	0.1649
1	BovineHD0100007863	26968734	2	0.3929	0.2398	1	0.07458	2.052		1	BovineHD0100007863	2	1	DOM	11/3	114/155	0.0111		1	BovineHD0100007863	2	1	REC	0/14	15/254	1
1	BovineHD0100007871	26982720	1	0	0.02974	2	1	0		1	BovineHD0100007871	1	2	DOM	0/14	16/253	1		1	BovineHD0100007871	1	2	REC	0/14	0/269	1
1	BovineHD0100007887	27032054	1	0	0.04259	2	0.6204	0		1	BovineHD0100007887	1	2	DOM	0/14	23/247	0.6134		1	BovineHD0100007887	1	2	REC	0/14	0/270	1
1	ARS-BFGL-BAC-13744	27106390	2	0.03571	0.05762	1	1	0.6057		1	ARS-BFGL-BAC-13744	2	1	DOM	1/13	30/239	1		1	ARS-BFGL-BAC-13744	2	1	REC	0/14	1/268	1
1	BovineHD0100007915	27118086	2	0.1071	0.1393	1	0.7841	0.7414		1	BovineHD0100007915	2	1	DOM	3/11	69/193	1		1	BovineHD0100007915	2	1	REC	0/14	4/258	1
1	ARS-BFGL-BAC-5834	27171038	1	0.03571	0.1236	2	0.2335	0.2626		1	ARS-BFGL-BAC-5834	1	2	DOM	1/13	64/207	0.2024		1	ARS-BFGL-BAC-5834	1	2	REC	0/14	3/268	1
1	Hapmap51561-BTA-120459	27239572	1	0.5	0.3782	2	0.2326	1.644		1	Hapmap51561-BTA-120459	1	2	DOM	12/2	169/102	0.09197		1	Hapmap51561-BTA-120459	1	2	REC	2/12	36/235	1
1	BovineHD0100007956	27267066	2	0.3571	0.487	1	0.2442	0.5852		1	BovineHD0100007956	2	1	DOM	10/4	203/66	0.753		1	BovineHD0100007956	2	1	REC	0/14	59/210	0.0471
1	BovineHD0100007959	27294161	2	0.1071	0.07993	1	0.4895	1.381		1	BovineHD0100007959	2	1	DOM	3/11	41/228	0.463		1	BovineHD0100007959	2	1	REC	0/14	2/267	1
1	BovineHD0100007973	27322794	2	0.3571	0.4888	1	0.2441	0.5809		1	BovineHD0100007973	2	1	DOM	10/4	203/66	0.753		1	BovineHD0100007973	2	1	REC	0/14	60/209	0.04621
1	BovineHD0100007992	27357800	1	0.3571	0.2862	2	0.4013	1.385		1	BovineHD0100007992	1	2	DOM	8/6	132/137	0.5947		1	BovineHD0100007992	1	2	REC	2/12	22/247	0.3366
1	BovineHD0100007997	27369765	1	0.1786	0.2727	2	0.3812	0.5797		1	BovineHD0100007997	1	2	DOM	4/10	130/134	0.1725		1	BovineHD0100007997	1	2	REC	1/13	14/250	0.5488
1	BTA-108804-no-rs	27491647	1	0.3214	0.4077	2	0.4325	0.688		1	BTA-108804-no-rs	1	2	DOM	7/7	176/95	0.2656		1	BTA-108804-no-rs	1	2	REC	2/12	45/226	1
1	Hapmap42876-BTA-23541	27602693	1	0.4286	0.4465	2	1	0.9298		1	Hapmap42876-BTA-23541	1	2	DOM	11/3	185/86	0.56		1	Hapmap42876-BTA-23541	1	2	REC	1/13	57/214	0.3142
1	BovineHD0100008084	27634159	1	0	0.07993	2	0.2584	0		1	BovineHD0100008084	1	2	DOM	0/14	41/228	0.2336		1	BovineHD0100008084	1	2	REC	0/14	2/267	1
1	BTB-00011225	27706076	2	0.25	0.2657	1	1	0.9213		1	BTB-00011225	2	1	DOM	6/8	126/145	1		1	BTB-00011225	2	1	REC	1/13	18/253	1
1	BovineHD0100008157	27829763	2	0.2857	0.2319	1	0.4972	1.325		1	BovineHD0100008157	2	1	DOM	7/7	110/153	0.5869		1	BovineHD0100008157	2	1	REC	1/13	12/251	0.4983
1	Hapmap50048-BTA-59263	27922359	1	0.3214	0.3339	2	1	0.9448		1	Hapmap50048-BTA-59263	1	2	DOM	9/5	155/116	0.7832		1	Hapmap50048-BTA-59263	1	2	REC	0/14	26/245	0.6249
1	BovineHD0100008201	27988236	2	0.1071	0.3011	1	0.03134	0.2785		1	BovineHD0100008201	2	1	DOM	3/11	140/129	0.02946		1	BovineHD0100008201	2	1	REC	0/14	22/247	0.6111
1	BovineHD0100008210	28027702	2	0.5714	0.4331	1	0.1735	1.745		1	BovineHD0100008210	2	1	DOM	10/4	185/84	1		1	BovineHD0100008210	2	1	REC	6/8	48/221	0.03182
1	BovineHD0100008220	28064356	1	0	0.1636	2	0.01365	0		1	BovineHD0100008220	1	2	DOM	0/14	75/194	0.02461		1	BovineHD0100008220	1	2	REC	0/14	13/256	1
1	BovineHD0100008239	28153747	1	0	0.1877	2	0.004875	0		1	BovineHD0100008239	1	2	DOM	0/14	96/173	0.003155		1	BovineHD0100008239	1	2	REC	0/14	5/264	1
1	BovineHD0100008245	28181841	1	0.3214	0.3704	2	0.6905	0.8053		1	BovineHD0100008245	1	2	DOM	9/5	172/98	1		1	BovineHD0100008245	1	2	REC	0/14	28/242	0.3746
1	BTB-01285304	28217099	2	0	0.19	1	0.00479	0		1	BTB-01285304	2	1	DOM	0/14	92/179	0.006094		1	BTB-01285304	2	1	REC	0/14	11/260	1
1	BTB-01285382	28243053	2	0	0.06273	1	0.4005	0		1	BTB-01285382	2	1	DOM	0/14	32/239	0.3796		1	BTB-01285382	2	1	REC	0/14	2/269	1
1	BTB-01285492	28272873	2	0	0.1218	1	0.06209	0		1	BTB-01285492	2	1	DOM	0/14	58/213	0.08108		1	BTB-01285492	2	1	REC	0/14	8/263	1
1	BovineHD0100008286	28320522	1	0.5714	0.4262	2	0.1704	1.795		1	BovineHD0100008286	1	2	DOM	12/2	185/86	0.2389		1	BovineHD0100008286	1	2	REC	4/10	46/225	0.2791
1	BovineHD0100008303	28378968	2	0.1071	0.2007	1	0.3281	0.4778		1	BovineHD0100008303	2	1	DOM	3/11	95/174	0.3926		1	BovineHD0100008303	2	1	REC	0/14	13/256	1
1	BovineHD0100008315	28408061	1	0.3929	0.2993	2	0.2975	1.515		1	BovineHD0100008315	1	2	DOM	11/3	140/129	0.05897		1	BovineHD0100008315	1	2	REC	0/14	21/248	0.6094
1	BTB-01285832	28434475	1	0.1429	0.2528	2	0.2613	0.4927		1	BTB-01285832	1	2	DOM	3/11	121/150	0.103		1	BTB-01285832	1	2	REC	1/13	16/255	0.586
1	BTB-01285855	28489054	2	0.3214	0.1859	1	0.08614	2.075		1	BTB-01285855	2	1	DOM	9/5	93/176	0.04152		1	BTB-01285855	2	1	REC	0/14	7/262	1
1	Hapmap59457-rs29010971	28529358	2	0.3929	0.3745	1	0.8437	1.081		1	Hapmap59457-rs29010971	2	1	DOM	10/4	165/106	0.5768		1	Hapmap59457-rs29010971	2	1	REC	1/13	38/233	0.7009
1	BTB-01285931	28566525	1	0.1786	0.2897	2	0.2825	0.5331		1	BTB-01285931	1	2	DOM	4/10	134/137	0.1718		1	BTB-01285931	1	2	REC	1/13	23/248	1
1	BTB-01334157	28612680	1	0.3929	0.4594	2	0.5622	0.7614		1	BTB-01334157	1	2	DOM	10/4	192/79	1		1	BTB-01334157	1	2	REC	1/13	57/214	0.3142
1	BovineHD0100008371	28628277	1	0.2143	0.2727	2	0.6627	0.7273		1	BovineHD0100008371	1	2	DOM	6/8	127/137	0.788		1	BovineHD0100008371	1	2	REC	0/14	17/247	1
1	BovineHD0100008372	28638172	1	0.2143	0.2251	2	1	0.9389		1	BovineHD0100008372	1	2	DOM	6/8	109/162	1		1	BovineHD0100008372	1	2	REC	0/14	13/258	1
1	BovineHD0100008394	28741233	1	0.2143	0.2122	2	1	1.013		1	BovineHD0100008394	1	2	DOM	6/8	104/167	0.7822		1	BovineHD0100008394	1	2	REC	0/14	11/260	1
1	BovineHD0100008409	28792375	2	0.2857	0.3395	1	0.6832	0.7783		1	BovineHD0100008409	2	1	DOM	7/7	152/119	0.7843		1	BovineHD0100008409	2	1	REC	1/13	32/239	1
1	ARS-BFGL-BAC-15042	28839476	1	0.3214	0.2657	2	0.5157	1.309		1	ARS-BFGL-BAC-15042	1	2	DOM	9/5	128/143	0.2757		1	ARS-BFGL-BAC-15042	1	2	REC	0/14	16/255	1
1	BovineHD0100008426	28852017	2	0.4643	0.4723	1	1	0.9682		1	BovineHD0100008426	2	1	DOM	11/3	200/71	1		1	BovineHD0100008426	2	1	REC	2/12	56/215	0.7423
1	BovineHD0100008438	28894165	1	0.2692	0.3034	2	0.8288	0.846		1	BovineHD0100008438	1	2	DOM	7/6	138/129	1		1	BovineHD0100008438	1	2	REC	0/13	24/243	0.6117
1	BovineHD0100008449	28939657	1	0.1429	0.1587	2	1	0.8837		1	BovineHD0100008449	1	2	DOM	4/10	81/190	1		1	BovineHD0100008449	1	2	REC	0/14	5/266	1
1	BTB-00012150	29021209	2	0.4643	0.4723	1	1	0.9682		1	BTB-00012150	2	1	DOM	12/2	192/79	0.3629		1	BTB-00012150	2	1	REC	1/13	64/207	0.2024
1	BovineHD0100008468	29027310	2	0.03571	0.1722	1	0.06633	0.178		1	BovineHD0100008468	2	1	DOM	1/13	79/191	0.1229		1	BovineHD0100008468	2	1	REC	0/14	14/256	1
1	BTB-00012128	29047612	2	0.3929	0.428	1	0.8452	0.8646		1	BTB-00012128	2	1	DOM	11/3	182/89	0.5594		1	BTB-00012128	2	1	REC	0/14	50/221	0.1403
1	ARS-BFGL-BAC-14387	29071379	1	0.5	0.4779	2	0.8483	1.093		1	ARS-BFGL-BAC-14387	1	2	DOM	12/2	192/79	0.3629		1	ARS-BFGL-BAC-14387	1	2	REC	2/12	67/204	0.5295
1	ARS-BFGL-NGS-20624	29124102	1	0	0.1107	2	0.06111	0		1	ARS-BFGL-NGS-20624	1	2	DOM	0/14	56/215	0.07971		1	ARS-BFGL-NGS-20624	1	2	REC	0/14	4/267	1
1	BovineHD0100008522	29147074	1	0.2143	0.184	2	0.6243	1.209		1	BovineHD0100008522	1	2	DOM	6/8	92/177	0.5683		1	BovineHD0100008522	1	2	REC	0/14	7/262	1
1	BTB-00011831	29217927	2	0.3929	0.3911	1	1	1.007		1	BTB-00011831	2	1	DOM	11/3	168/103	0.2655		1	BTB-00011831	2	1	REC	0/14	44/227	0.1376
1	BTB-00012396	29239316	2	0.5	0.4201	1	0.4367	1.381		1	BTB-00012396	2	1	DOM	12/2	175/94	0.1504		1	BTB-00012396	2	1	REC	2/12	51/218	1
1	BovineHD0100008555	29249975	1	0.03571	0.1347	2	0.1571	0.238		1	BovineHD0100008555	1	2	DOM	1/13	67/204	0.1997		1	BovineHD0100008555	1	2	REC	0/14	6/265	1
1	ARS-BFGL-BAC-15059	29316022	1	0.1071	0.2159	2	0.2345	0.4359		1	ARS-BFGL-BAC-15059	1	2	DOM	2/12	105/166	0.08885		1	ARS-BFGL-BAC-15059	1	2	REC	1/13	12/259	0.488
1	ARS-BFGL-NGS-119690	29353509	1	0.4643	0.4096	2	0.5621	1.249		1	ARS-BFGL-NGS-119690	1	2	DOM	11/3	174/97	0.3919		1	ARS-BFGL-NGS-119690	1	2	REC	2/12	48/223	1
1	ARS-BFGL-BAC-15061	29386594	2	0.4643	0.3963	1	0.5538	1.32		1	ARS-BFGL-BAC-15061	2	1	DOM	11/3	173/97	0.3917		1	ARS-BFGL-BAC-15061	2	1	REC	2/12	41/229	1
1	BTA-59279-no-rs	29411641	2	0.07143	0.1144	1	0.7582	0.5955		1	BTA-59279-no-rs	2	1	DOM	2/12	58/213	0.7413		1	BTA-59279-no-rs	2	1	REC	0/14	4/267	1
1	BTB-00012425	29424487	2	0.1429	0.1919	1	0.6283	0.7019		1	BTB-00012425	2	1	DOM	4/10	95/176	0.7769		1	BTB-00012425	2	1	REC	0/14	9/262	1
1	BTB-00012448	29451206	1	0.1786	0.2214	2	0.8148	0.7645		1	BTB-00012448	1	2	DOM	4/10	108/163	0.5764		1	BTB-00012448	1	2	REC	1/13	12/259	0.488
1	BTB-01734642	29520198	2	0.2143	0.31	1	0.3998	0.6071		1	BTB-01734642	2	1	DOM	4/10	146/125	0.09733		1	BTB-01734642	2	1	REC	2/12	22/249	0.3333
1	ARS-BFGL-NGS-108911	29541996	1	0.3571	0.3155	2	0.6789	1.205		1	ARS-BFGL-NGS-108911	1	2	DOM	10/4	147/124	0.2742		1	ARS-BFGL-NGS-108911	1	2	REC	0/14	24/247	0.6164
1	ARS-BFGL-NGS-100058	29576850	1	0.3929	0.4	2	1	0.9706		1	ARS-BFGL-NGS-100058	1	2	DOM	11/3	177/93	0.3959		1	ARS-BFGL-NGS-100058	1	2	REC	0/14	39/231	0.2293
1	BTB-00012560	29641444	1	0.07143	0.08487	2	1	0.8294		1	BTB-00012560	1	2	DOM	2/12	44/227	1		1	BTB-00012560	1	2	REC	0/14	2/269	1
1	Hapmap40010-BTA-59286	29687411	2	0.4643	0.476	1	1	0.954		1	Hapmap40010-BTA-59286	2	1	DOM	11/3	198/73	0.7664		1	Hapmap40010-BTA-59286	2	1	REC	2/12	60/211	0.7414
1	BovineHD0100008662	29712048	1	0.03571	0.1519	2	0.1032	0.2069		1	BovineHD0100008662	1	2	DOM	1/13	79/191	0.1229		1	BovineHD0100008662	1	2	REC	0/14	3/267	1
1	BTB-00012627	29718126	1	0.4643	0.4296	2	0.8453	1.151		1	BTB-00012627	1	2	DOM	12/2	181/89	0.2385		1	BTB-00012627	1	2	REC	1/13	51/219	0.478
1	ARS-BFGL-BAC-11193	29747969	1	0.5	0.4631	2	0.7033	1.159		1	ARS-BFGL-BAC-11193	1	2	DOM	12/2	194/77	0.3631		1	ARS-BFGL-BAC-11193	1	2	REC	2/12	57/214	0.7417
1	BovineHD0100008680	29773499	1	0.5	0.4889	2	1	1.045		1	BovineHD0100008680	1	2	DOM	12/2	202/68	0.529		1	BovineHD0100008680	1	2	REC	2/12	62/208	0.7428
1	BovineHD0100008695	29835507	2	0.5	0.4852	1	1	1.061		1	BovineHD0100008695	2	1	DOM	12/2	202/69	0.529		1	BovineHD0100008695	2	1	REC	2/12	61/210	0.7419
1	ARS-BFGL-NGS-24142	29859693	2	0.03571	0.1033	1	0.3447	0.3214		1	ARS-BFGL-NGS-24142	2	1	DOM	1/13	56/215	0.3151		1	ARS-BFGL-NGS-24142	2	1	REC	0/14	0/271	1
1	BovineHD0100008702	29875513	2	0.5	0.4755	1	0.8428	1.103		1	BovineHD0100008702	2	1	DOM	11/2	192/73	0.5243		1	BovineHD0100008702	2	1	REC	2/11	60/205	0.7393
1	BovineHD0100008719	29915443	2	0.03571	0.1506	1	0.1036	0.209		1	BovineHD0100008719	2	1	DOM	1/13	76/193	0.122		1	BovineHD0100008719	2	1	REC	0/14	5/264	1
1	BovineHD0100008729	29938999	1	0.5	0.4519	2	0.6984	1.213		1	BovineHD0100008729	1	2	DOM	12/2	188/82	0.2445		1	BovineHD0100008729	1	2	REC	2/12	56/214	0.7421
1	ARS-BFGL-NGS-114084	29944908	2	0.03571	0.1605	1	0.1033	0.1937		1	ARS-BFGL-NGS-114084	2	1	DOM	1/13	80/191	0.1236		1	ARS-BFGL-NGS-114084	2	1	REC	0/14	7/264	1
1	ARS-USMARC-Parent-DQ451555-rs29010795	29963400	1	0.5	0.4834	2	1	1.069		1	ARS-USMARC-Parent-DQ451555-rs29010795	1	2	DOM	12/2	201/70	0.5294		1	ARS-USMARC-Parent-DQ451555-rs29010795	1	2	REC	2/12	61/210	0.7419
1	BovineHD0100008739	29980510	1	0.4286	0.4026	2	0.8443	1.113		1	BovineHD0100008739	1	2	DOM	10/4	170/97	0.7763		1	BovineHD0100008739	1	2	REC	2/12	45/222	1
1	BovineHD0100008741	29984913	1	0.1071	0.1338	2	1	0.7767		1	BovineHD0100008741	1	2	DOM	3/11	68/201	1		1	BovineHD0100008741	1	2	REC	0/14	4/265	1
1	BovineHD0100008745	30003117	1	0.4286	0.3783	2	0.6903	1.233		1	BovineHD0100008745	1	2	DOM	10/4	161/106	0.5763		1	BovineHD0100008745	1	2	REC	2/12	41/226	1
1	BovineHD0100008746	30006137	2	0.4643	0.4926	1	0.8474	0.8926		1	BovineHD0100008746	2	1	DOM	11/3	201/70	1		1	BovineHD0100008746	2	1	REC	2/12	66/205	0.5303
1	BovineHD0100008748	30011802	1	0.4286	0.3858	2	0.6929	1.194		1	BovineHD0100008748	1	2	DOM	10/4	164/103	0.5778		1	BovineHD0100008748	1	2	REC	2/12	42/225	1
1	BovineHD0100008749	30018380	1	0.2857	0.2889	2	1	0.9846		1	BovineHD0100008749	1	2	DOM	8/6	136/134	0.7855		1	BovineHD0100008749	1	2	REC	0/14	20/250	0.6086
1	ARS-BFGL-NGS-40513	30092167	1	0.4286	0.3672	2	0.5497	1.293		1	ARS-BFGL-NGS-40513	1	2	DOM	10/4	159/112	0.4131		1	ARS-BFGL-NGS-40513	1	2	REC	2/12	40/231	1
1	BovineHD0100008775	30113163	1	0.07143	0.1328	2	0.5622	0.5021		1	BovineHD0100008775	1	2	DOM	2/12	67/204	0.5295		1	BovineHD0100008775	1	2	REC	0/14	5/266	1
1	BovineHD0100008800	30232831	2	0.4643	0.4015	1	0.5561	1.292		1	BovineHD0100008800	2	1	DOM	11/3	171/98	0.3916		1	BovineHD0100008800	2	1	REC	2/12	45/224	1
1	BTA-59299-no-rs	30241742	1	0.1429	0.2565	2	0.2621	0.4832		1	BTA-59299-no-rs	1	2	DOM	4/10	122/149	0.2778		1	BTA-59299-no-rs	1	2	REC	0/14	17/254	1
1	BTA-59305-no-rs	30323359	2	0.07143	0.1171	1	0.7594	0.58		1	BTA-59305-no-rs	2	1	DOM	2/12	59/210	0.7412		1	BTA-59305-no-rs	2	1	REC	0/14	4/265	1
1	BovineHD0100008840	30392152	2	0.07143	0.1852	1	0.2026	0.3385		1	BovineHD0100008840	2	1	DOM	2/12	90/180	0.2393		1	BovineHD0100008840	2	1	REC	0/14	10/260	1
1	ARS-BFGL-BAC-7369	30418294	2	0	0.02399	1	1	0		1	ARS-BFGL-BAC-7369	2	1	DOM	0/14	12/259	1		1	ARS-BFGL-BAC-7369	2	1	REC	0/14	1/270	1
1	ARS-BFGL-NGS-14285	30449967	2	0.07143	0.1624	1	0.288	0.3969		1	ARS-BFGL-NGS-14285	2	1	DOM	2/12	81/190	0.3644		1	ARS-BFGL-NGS-14285	2	1	REC	0/14	7/264	1
1	BTB-01490065	30659162	1	0.07143	0.08704	2	1	0.8069		1	BTB-01490065	1	2	DOM	2/12	44/226	1		1	BTB-01490065	1	2	REC	0/14	3/267	1
1	ARS-BFGL-NGS-73149	30694694	2	0.07143	0.1444	1	0.4056	0.4556		1	ARS-BFGL-NGS-73149	2	1	DOM	2/12	74/196	0.3661		1	ARS-BFGL-NGS-73149	2	1	REC	0/14	4/266	1
1	BovineHD0100008921	30743768	2	0.1071	0.1798	1	0.448	0.5475		1	BovineHD0100008921	2	1	DOM	3/11	87/180	0.5591		1	BovineHD0100008921	2	1	REC	0/14	9/258	1
1	BovineHD0100008923	30746202	2	0.1071	0.1798	1	0.448	0.5475		1	BovineHD0100008923	2	1	DOM	3/11	87/180	0.5591		1	BovineHD0100008923	2	1	REC	0/14	9/258	1
1	BovineHD0100008924	30746814	1	0.1071	0.1798	2	0.448	0.5475		1	BovineHD0100008924	1	2	DOM	3/11	87/180	0.5591		1	BovineHD0100008924	1	2	REC	0/14	9/258	1
1	BovineHD0100008927	30750780	2	0.1071	0.1798	1	0.448	0.5475		1	BovineHD0100008927	2	1	DOM	3/11	87/180	0.5591		1	BovineHD0100008927	2	1	REC	0/14	9/258	1
1	BovineHD0100008928	30751532	1	0.1071	0.1798	2	0.448	0.5475		1	BovineHD0100008928	1	2	DOM	3/11	87/180	0.5591		1	BovineHD0100008928	1	2	REC	0/14	9/258	1
1	BovineHD0100008930	30755257	1	0.1071	0.1798	2	0.448	0.5475		1	BovineHD0100008930	1	2	DOM	3/11	87/180	0.5591		1	BovineHD0100008930	1	2	REC	0/14	9/258	1
1	BTA-97531-no-rs	30759148	1	0.1071	0.1827	2	0.4485	0.537		1	BTA-97531-no-rs	1	2	DOM	3/11	90/181	0.5598		1	BTA-97531-no-rs	1	2	REC	0/14	9/262	1
1	BovineHD0100008936	30780515	1	0.03571	0.07037	2	0.7122	0.4893		1	BovineHD0100008936	1	2	DOM	1/13	37/233	0.7016		1	BovineHD0100008936	1	2	REC	0/14	1/269	1
1	BTB-01490270	30840833	2	0.4286	0.4225	1	1	1.025		1	BTB-01490270	2	1	DOM	10/4	180/91	0.7802		1	BTB-01490270	2	1	REC	2/12	49/222	1
1	BovineHD0100008950	30893510	2	0.3077	0.2323	1	0.3532	1.468		1	BovineHD0100008950	2	1	DOM	8/5	114/155	0.2514		1	BovineHD0100008950	2	1	REC	0/13	11/258	1
1	BTA-18114-no-rs	30972284	1	0	0.04244	2	0.6202	0		1	BTA-18114-no-rs	1	2	DOM	0/14	21/250	0.6093		1	BTA-18114-no-rs	1	2	REC	0/14	2/269	1
1	ARS-BFGL-NGS-40158	30999614	2	0.07143	0.1328	1	0.5622	0.5021		1	ARS-BFGL-NGS-40158	2	1	DOM	2/12	67/204	0.5295		1	ARS-BFGL-NGS-40158	2	1	REC	0/14	5/266	1
1	ARS-BFGL-BAC-11830	31035369	2	0.07143	0.09779	1	1	0.7097		1	ARS-BFGL-BAC-11830	2	1	DOM	2/12	51/220	1		1	ARS-BFGL-BAC-11830	2	1	REC	0/14	2/269	1
1	BTB-01303393	31082779	1	0.1429	0.2177	2	0.4794	0.5989		1	BTB-01303393	1	2	DOM	3/11	107/164	0.261		1	BTB-01303393	1	2	REC	1/13	11/260	0.4603
1	BTB-01303334	31129370	2	0.07143	0.1019	1	1	0.6783		1	BTB-01303334	2	1	DOM	2/12	52/218	1		1	BTB-01303334	2	1	REC	0/14	3/267	1
1	BTA-87372-no-rs	31151496	1	0.4643	0.4834	2	1	0.9262		1	BTA-87372-no-rs	1	2	DOM	10/4	198/73	1		1	BTA-87372-no-rs	1	2	REC	3/11	64/207	1
1	BTA-41946-no-rs	31171747	1	0.3571	0.2823	2	0.3957	1.412		1	BTA-41946-no-rs	1	2	DOM	9/5	132/139	0.2854		1	BTA-41946-no-rs	1	2	REC	1/13	21/250	1
1	Hapmap32039-BTA-131798	31250241	1	0.07143	0.06089	2	0.6872	1.186		1	Hapmap32039-BTA-131798	1	2	DOM	2/12	33/238	0.6847		1	Hapmap32039-BTA-131798	1	2	REC	0/14	0/271	1
1	BovineHD0100009052	31270891	1	0.1071	0.1537	2	0.7858	0.6607		1	BovineHD0100009052	1	2	DOM	2/12	77/193	0.3629		1	BovineHD0100009052	1	2	REC	1/13	6/264	0.3008
1	Hapmap50687-BTA-41950	31302244	1	0.03571	0.07749	2	0.7134	0.4409		1	Hapmap50687-BTA-41950	1	2	DOM	1/13	41/230	0.7011		1	Hapmap50687-BTA-41950	1	2	REC	0/14	1/270	1
1	BTB-00013894	31424587	2	0.07143	0.05904	1	0.68	1.226		1	BTB-00013894	2	1	DOM	2/12	32/239	0.677		1	BTB-00013894	2	1	REC	0/14	0/271	1
1	ARS-BFGL-NGS-97949	31450731	2	0	0.03321	1	1	0		1	ARS-BFGL-NGS-97949	2	1	DOM	0/14	16/255	1		1	ARS-BFGL-NGS-97949	2	1	REC	0/14	2/269	1
1	BovineHD0100009129	31557192	1	0.3214	0.2722	2	0.6641	1.266		1	BovineHD0100009129	1	2	DOM	9/5	129/141	0.2786		1	BovineHD0100009129	1	2	REC	0/14	18/252	1
1	BTA-110980-no-rs	31606418	1	0.4643	0.4539	2	1	1.043		1	BTA-110980-no-rs	1	2	DOM	11/3	186/85	0.5609		1	BTA-110980-no-rs	1	2	REC	2/12	60/211	0.7414
1	BTB-01653833	31639548	2	0.4286	0.4742	1	0.7006	0.8317		1	BTB-01653833	2	1	DOM	10/4	198/73	1		1	BTB-01653833	2	1	REC	2/12	59/212	0.7412
1	BTB-01653794	31672750	1	0.3571	0.3506	2	1	1.029		1	BTB-01653794	1	2	DOM	9/5	160/111	0.786		1	BTB-01653794	1	2	REC	1/13	30/241	1
1	BTB-01335754	31699827	2	0.07143	0.1605	1	0.2878	0.4023		1	BTB-01335754	2	1	DOM	2/12	83/188	0.243		1	BTB-01335754	2	1	REC	0/14	4/267	1
1	BTB-01335860	31755884	1	0.03571	0.1033	2	0.3447	0.3214		1	BTB-01335860	1	2	DOM	1/13	55/216	0.3166		1	BTB-01335860	1	2	REC	0/14	1/270	1
1	BovineHD0100009190	31915959	2	0.1786	0.2111	1	0.8146	0.8124		1	BovineHD0100009190	2	1	DOM	4/10	103/167	0.5792		1	BovineHD0100009190	2	1	REC	1/13	11/259	0.4615
1	BovineHD0100009210	32073771	2	0.4286	0.3843	1	0.6923	1.201		1	BovineHD0100009210	2	1	DOM	10/4	164/104	0.5773		1	BovineHD0100009210	2	1	REC	2/12	42/226	1
1	BTB-01843131	32091115	1	0.07143	0.2122	2	0.09133	0.2856		1	BTB-01843131	1	2	DOM	2/12	104/167	0.08965		1	BTB-01843131	1	2	REC	0/14	11/260	1
1	ARS-BFGL-NGS-80747	32132657	2	0.1071	0.2454	1	0.1128	0.369		1	ARS-BFGL-NGS-80747	2	1	DOM	3/11	117/154	0.1641		1	ARS-BFGL-NGS-80747	2	1	REC	0/14	16/255	1
1	BTB-01955576	32247439	2	0.07143	0.179	1	0.2003	0.3529		1	BTB-01955576	2	1	DOM	2/12	87/184	0.2383		1	BTB-01955576	2	1	REC	0/14	10/261	1
1	BTB-01755357	32304105	2	0.3571	0.3672	1	1	0.9576		1	BTB-01755357	2	1	DOM	10/4	163/108	0.5764		1	BTB-01755357	2	1	REC	0/14	36/235	0.2289
1	BTB-02018681	32357222	1	0.03571	0.1766	2	0.06673	0.1727		1	BTB-02018681	1	2	DOM	1/13	84/185	0.07165		1	BTB-02018681	1	2	REC	0/14	11/258	1
1	BTB-00014284	32424393	2	0.2143	0.2122	1	1	1.013		1	BTB-00014284	2	1	DOM	5/9	105/166	1		1	BTB-00014284	2	1	REC	1/13	10/261	0.4312
1	BTB-00014368	32511532	1	0.03571	0.1716	2	0.06637	0.1788		1	BTB-00014368	1	2	DOM	1/13	82/189	0.07371		1	BTB-00014368	1	2	REC	0/14	11/260	1
1	BTB-00014500	32640244	1	0.1071	0.2897	2	0.04954	0.2943		1	BTB-00014500	1	2	DOM	3/11	134/137	0.05392		1	BTB-00014500	1	2	REC	0/14	23/248	0.6132
1	BTB-00014527	32683856	2	0.1429	0.1208	1	0.765	1.213		1	BTB-00014527	2	1	DOM	3/11	60/209	1		1	BTB-00014527	2	1	REC	1/13	5/264	0.2645
1	Hapmap38175-BTA-69177	32741957	1	0.5714	0.428	2	0.171	1.782		1	Hapmap38175-BTA-69177	1	2	DOM	13/1	186/85	0.07154		1	Hapmap38175-BTA-69177	1	2	REC	3/11	46/225	0.7149
1	BovineHD0100009346	32866434	2	0.4286	0.5037	1	0.5617	0.739		1	BovineHD0100009346	2	1	DOM	10/4	204/66	0.7525		1	BovineHD0100009346	2	1	REC	2/12	68/202	0.529
1	BTB-00014850	32943411	1	0.1429	0.1611	2	1	0.8678		1	BTB-00014850	1	2	DOM	3/11	79/191	0.7636		1	BTB-00014850	1	2	REC	1/13	8/262	0.3698
1	BTB-00014929	32993823	2	0.1429	0.1661	1	1	0.837		1	BTB-00014929	2	1	DOM	3/11	79/192	0.7636		1	BTB-00014929	2	1	REC	1/13	11/260	0.4603
1	BTA-69182-no-rs	33076473	2	0.4286	0.2657	1	0.07979	2.073		1	BTA-69182-no-rs	2	1	DOM	11/3	124/147	0.02522		1	BTA-69182-no-rs	2	1	REC	1/13	20/251	1
1	BTB-00015164	33136647	1	0.4286	0.369	2	0.551	1.282		1	BTB-00015164	1	2	DOM	9/5	163/108	1		1	BTB-00015164	1	2	REC	3/11	37/234	0.4252
1	Hapmap58994-rs29021251	33175064	1	0.03571	0.04982	2	1	0.7064		1	Hapmap58994-rs29021251	1	2	DOM	1/13	25/246	1		1	Hapmap58994-rs29021251	1	2	REC	0/14	2/269	1
1	BovineHD0100009448	33218979	1	0.4643	0.4685	2	1	0.9831		1	BovineHD0100009448	1	2	DOM	10/4	199/71	0.7661		1	BovineHD0100009448	1	2	REC	3/11	54/216	1
1	BTB-00016647	33342088	1	0.5	0.4336	2	0.5595	1.306		1	BTB-00016647	1	2	DOM	11/3	184/87	0.5595		1	BTB-00016647	1	2	REC	3/11	51/220	0.7333
1	BTA-69212-no-rs	33398878	1	0.25	0.3911	2	0.1644	0.5189		1	BTA-69212-no-rs	1	2	DOM	6/8	176/95	0.1506		1	BTA-69212-no-rs	1	2	REC	1/13	36/235	1
1	BovineHD0100009494	33426743	1	0.5357	0.3358	2	0.04031	2.282		1	BovineHD0100009494	1	2	DOM	11/3	150/121	0.103		1	BovineHD0100009494	1	2	REC	4/10	32/239	0.08492
1	BovineHD0100009515	33496557	1	0.03571	0.2426	2	0.009749	0.1156		1	BovineHD0100009515	1	2	DOM	1/13	116/154	0.009672		1	BovineHD0100009515	1	2	REC	0/14	15/255	1
1	Hapmap48855-BTA-69221	33560583	2	0	0.2472	1	0.0008416	0		1	Hapmap48855-BTA-69221	2	1	DOM	0/14	118/153	0.0005072		1	Hapmap48855-BTA-69221	2	1	REC	0/14	16/255	1
1	BovineHD0100009559	33607347	1	0.5	0.4352	2	0.5601	1.298		1	BovineHD0100009559	1	2	DOM	11/3	184/86	0.5598		1	BovineHD0100009559	1	2	REC	3/11	51/219	0.7341
1	BTA-69226-no-rs	33610831	1	0.7143	0.4004	2	0.001356	3.744		1	BTA-69226-no-rs	1	2	DOM	12/2	173/98	0.1489		1	BTA-69226-no-rs	1	2	REC	8/6	44/227	0.000925
1	BovineHD0100009570	33634151	1	0.1786	0.4407	2	0.005833	0.2758		1	BovineHD0100009570	1	2	DOM	4/10	181/89	0.006877		1	BovineHD0100009570	1	2	REC	1/13	57/213	0.3141
1	BovineHD0100009592	33688529	2	0.2857	0.2019	1	0.3353	1.582		1	BovineHD0100009592	2	1	DOM	8/6	99/171	0.1581		1	BovineHD0100009592	2	1	REC	0/14	10/260	1
1	BTB-00902072	33805826	1	0.07143	0.1259	2	0.5599	0.5339		1	BTB-00902072	1	2	DOM	2/12	63/207	0.7438		1	BTB-00902072	1	2	REC	0/14	5/265	1
1	BovineHD0100009633	33826972	2	0.4286	0.4906	1	0.5652	0.7786		1	BovineHD0100009633	2	1	DOM	9/5	199/68	0.3664		1	BovineHD0100009633	2	1	REC	3/11	63/204	1
1	BovineHD0100009652	33903021	2	0.7143	0.4815	1	0.0194	2.692		1	BovineHD0100009652	2	1	DOM	12/2	196/74	0.3661		1	BovineHD0100009652	2	1	REC	8/6	64/206	0.009481
1	ARS-BFGL-NGS-45064	33916347	2	0.6786	0.4428	1	0.01862	2.656		1	ARS-BFGL-NGS-45064	2	1	DOM	12/2	186/85	0.2399		1	ARS-BFGL-NGS-45064	2	1	REC	7/7	54/217	0.01447
1	BovineHD0100009664	33935558	1	0.5	0.4336	2	0.5595	1.306		1	BovineHD0100009664	1	2	DOM	11/3	185/86	0.56		1	BovineHD0100009664	1	2	REC	3/11	50/221	0.7292
1	Hapmap43403-BTA-91448	33964232	2	0.3929	0.2768	1	0.1985	1.691		1	Hapmap43403-BTA-91448	2	1	DOM	10/4	130/141	0.1043		1	Hapmap43403-BTA-91448	2	1	REC	1/13	20/251	1
1	BTB-01419032	33988612	2	0	0.09888	1	0.09714	0		1	BTB-01419032	2	1	DOM	0/14	51/217	0.08145		1	BTB-01419032	2	1	REC	0/14	2/266	1
1	BovineHD0100009674	33992020	1	0.5	0.487	2	1	1.053		1	BovineHD0100009674	1	2	DOM	11/3	200/70	1		1	BovineHD0100009674	1	2	REC	3/11	63/207	1
1	BTA-91456-no-rs	34021093	2	0	0.0941	1	0.1624	0		1	BTA-91456-no-rs	2	1	DOM	0/14	51/220	0.08223		1	BTA-91456-no-rs	2	1	REC	0/14	0/271	1
1	Hapmap34824-BES10_Contig592_452	34068395	1	0.3214	0.3727	2	0.6901	0.7973		1	Hapmap34824-BES10_Contig592_452	1	2	DOM	9/5	167/104	1		1	Hapmap34824-BES10_Contig592_452	1	2	REC	0/14	35/236	0.2303
1	BovineHD0100009723	34158319	1	0.07143	0.1648	2	0.2886	0.3898		1	BovineHD0100009723	1	2	DOM	2/12	81/189	0.3647		1	BovineHD0100009723	1	2	REC	0/14	8/262	1
1	BTB-00929993	34231964	2	0	0.04428	1	0.6233	0		1	BTB-00929993	2	1	DOM	0/14	24/247	0.6164		1	BTB-00929993	2	1	REC	0/14	0/271	1
1	Hapmap55373-rs29027574	34360152	1	0.1786	0.3376	2	0.0992	0.4265		1	Hapmap55373-rs29027574	1	2	DOM	5/9	157/114	0.1644		1	Hapmap55373-rs29027574	1	2	REC	0/14	26/245	0.6249
1	BTB-00930093	34400126	2	0	0.1107	1	0.06111	0		1	BTB-00930093	2	1	DOM	0/14	59/212	0.08227		1	BTB-00930093	2	1	REC	0/14	1/270	1
1	BTB-00930215	34424718	1	0.3214	0.3542	2	0.8404	0.8635		1	BTB-00930215	1	2	DOM	7/7	159/112	0.5841		1	BTB-00930215	1	2	REC	2/12	33/238	0.6847
1	BTB-00930351	34458042	2	0	0.09041	1	0.1581	0		1	BTB-00930351	2	1	DOM	0/14	49/222	0.1386		1	BTB-00930351	2	1	REC	0/14	0/271	1
1	Hapmap49364-BTA-89353	34500276	2	0.3571	0.3339	1	0.8383	1.108		1	Hapmap49364-BTA-89353	2	1	DOM	8/6	149/122	1		1	Hapmap49364-BTA-89353	2	1	REC	2/12	32/239	0.677
1	BTB-01965833	34602877	1	0.6429	0.4649	2	0.08061	2.071		1	BTB-01965833	1	2	DOM	12/2	193/78	0.3628		1	BTB-01965833	1	2	REC	6/8	59/212	0.09607
1	BTB-01965810	34624045	2	0.07143	0.1144	1	0.7582	0.5955		1	BTB-01965810	2	1	DOM	2/12	56/215	0.7423		1	BTB-01965810	2	1	REC	0/14	6/265	1
1	BovineHD0100009808	34629115	1	0.3214	0.4889	2	0.1194	0.4952		1	BovineHD0100009808	1	2	DOM	8/6	188/82	0.3764		1	BovineHD0100009808	1	2	REC	1/13	76/194	0.1221
1	BovineHD0100009809	34638715	1	0.25	0.3801	2	0.2287	0.5435		1	BovineHD0100009809	1	2	DOM	6/8	159/108	0.2685		1	BovineHD0100009809	1	2	REC	1/13	44/223	0.7061
1	Hapmap43629-BTA-60810	34663026	2	0.4286	0.5019	1	0.5618	0.7445		1	Hapmap43629-BTA-60810	2	1	DOM	9/5	195/75	0.547		1	Hapmap43629-BTA-60810	2	1	REC	3/11	76/194	0.7639
1	BTB-01211075	34723604	2	0.2143	0.3444	1	0.2182	0.5191		1	BTB-01211075	2	1	DOM	5/9	147/123	0.1833		1	BTB-01211075	2	1	REC	1/13	39/231	0.7005
1	Hapmap47907-BTA-29493	34756687	1	0.03571	0.06273	2	1	0.5534		1	Hapmap47907-BTA-29493	1	2	DOM	1/13	34/237	1		1	Hapmap47907-BTA-29493	1	2	REC	0/14	0/271	1
1	Hapmap43823-BTA-27227	34779787	2	0.3929	0.4649	1	0.5609	0.7446		1	Hapmap43823-BTA-27227	2	1	DOM	9/5	193/78	0.5577		1	Hapmap43823-BTA-27227	2	1	REC	2/12	59/212	0.7412
1	BTB-01890914	34803049	2	0.2143	0.2638	1	0.6635	0.761		1	BTB-01890914	2	1	DOM	5/9	125/146	0.585		1	BTB-01890914	2	1	REC	1/13	18/253	1
1	UA-IFASA-4161	34824930	2	0.3929	0.4613	1	0.5616	0.7558		1	UA-IFASA-4161	2	1	DOM	9/5	191/80	0.765		1	UA-IFASA-4161	2	1	REC	2/12	59/212	0.7412
1	BTB-01210899	34866883	2	0	0.07963	1	0.2578	0		1	BTB-01210899	2	1	DOM	0/14	40/230	0.2309		1	BTB-01210899	2	1	REC	0/14	3/267	1
1	ARS-BFGL-BAC-12481	34908448	1	0.2143	0.3339	2	0.2202	0.5439		1	ARS-BFGL-BAC-12481	1	2	DOM	5/9	143/128	0.2757		1	ARS-BFGL-BAC-12481	1	2	REC	1/13	38/233	0.7009
1	BovineHD0100009896	34918486	2	0	0.1124	1	0.06065	0		1	BovineHD0100009896	2	1	DOM	0/14	56/211	0.07999		1	BovineHD0100009896	2	1	REC	0/14	4/263	1
1	BovineHD0100009902	34927781	2	0	0.04815	1	0.6317	0		1	BovineHD0100009902	2	1	DOM	0/14	25/245	0.6207		1	BovineHD0100009902	2	1	REC	0/14	1/269	1
1	BTB-00017000	34931862	2	0.3929	0.2897	1	0.2874	1.587		1	BTB-00017000	2	1	DOM	9/5	135/136	0.4124		1	BTB-00017000	2	1	REC	2/12	22/249	0.3333
1	Hapmap43052-BTA-79184	34954810	1	0.2857	0.1513	2	0.06517	2.244		1	Hapmap43052-BTA-79184	1	2	DOM	6/8	75/196	0.2323		1	Hapmap43052-BTA-79184	1	2	REC	2/12	7/264	0.06627
1	BTA-79188-no-rs	34978818	2	0	0.03889	1	0.6165	0		1	BTA-79188-no-rs	2	1	DOM	0/14	21/249	0.6093		1	BTA-79188-no-rs	2	1	REC	0/14	0/270	1
1	BTA-111131-no-rs	35000632	2	0.4286	0.4059	1	0.8451	1.098		1	BTA-111131-no-rs	2	1	DOM	10/4	179/92	0.7791		1	BTA-111131-no-rs	2	1	REC	2/12	41/230	1
1	BovineHD0100009933	35043254	2	0.2143	0.395	1	0.07179	0.4177		1	BovineHD0100009933	2	1	DOM	6/8	166/96	0.1578		1	BovineHD0100009933	2	1	REC	0/14	41/221	0.2365
1	BTB-01210806	35050813	1	0.2143	0.3911	2	0.07258	0.4245		1	BTB-01210806	1	2	DOM	6/8	171/100	0.1596		1	BTB-01210806	1	2	REC	0/14	41/230	0.2329
1	BovineHD0100009941	35065680	1	0.1786	0.374	2	0.04293	0.3638		1	BovineHD0100009941	1	2	DOM	5/9	157/105	0.0951		1	BovineHD0100009941	1	2	REC	0/14	39/223	0.2309
1	BovineHD0100009943	35076740	1	0.1786	0.3664	2	0.04452	0.3759		1	BovineHD0100009943	1	2	DOM	5/9	154/108	0.102		1	BovineHD0100009943	1	2	REC	0/14	38/224	0.2291
1	BovineHD0100009944	35081085	1	0.1786	0.3664	2	0.04452	0.3759		1	BovineHD0100009944	1	2	DOM	5/9	154/108	0.102		1	BovineHD0100009944	1	2	REC	0/14	38/224	0.2291
1	BovineHD0100009945	35082343	1	0.1786	0.3611	2	0.06597	0.3846		1	BovineHD0100009945	1	2	DOM	5/9	157/113	0.1641		1	BovineHD0100009945	1	2	REC	0/14	38/232	0.2284
1	BovineHD0100009950	35109384	1	0.4643	0.4679	2	1	0.9855		1	BovineHD0100009950	1	2	DOM	10/4	192/73	1		1	BovineHD0100009950	1	2	REC	3/11	56/209	1
1	BovineHD0100009954	35124823	2	0.4643	0.4777	1	1	0.9476		1	BovineHD0100009954	2	1	DOM	10/4	197/72	1		1	BovineHD0100009954	2	1	REC	3/11	60/209	1
1	BTA-111133-no-rs	35149839	1	0.2857	0.3819	2	0.4241	0.6473		1	BTA-111133-no-rs	1	2	DOM	6/8	166/105	0.2615		1	BTA-111133-no-rs	1	2	REC	2/12	41/230	1
1	BovineHD0100009976	35197382	2	0	0.1604	1	0.01364	0		1	BovineHD0100009976	2	1	DOM	0/14	84/181	0.00704		1	BovineHD0100009976	2	1	REC	0/14	1/264	1
1	ARS-BFGL-NGS-100434	35277715	1	0	0.1882	2	0.004858	0		1	ARS-BFGL-NGS-100434	1	2	DOM	0/14	98/173	0.003002		1	ARS-BFGL-NGS-100434	1	2	REC	0/14	4/267	1
1	BovineHD0100010000	35292924	1	0.3571	0.4532	2	0.3381	0.6703		1	BovineHD0100010000	1	2	DOM	8/6	188/79	0.3702		1	BovineHD0100010000	1	2	REC	2/12	54/213	0.7434
1	BovineHD0100010002	35301764	1	0.03571	0.2185	2	0.01626	0.1325		1	BovineHD0100010002	1	2	DOM	1/13	110/160	0.0109		1	BovineHD0100010002	1	2	REC	0/14	8/262	1
1	BovineHD0100010009	35343945	1	0.3929	0.3327	2	0.5407	1.298		1	BovineHD0100010009	1	2	DOM	8/6	146/123	1		1	BovineHD0100010009	1	2	REC	3/11	33/236	0.3989
1	BTB-00016701	35345339	2	0.2857	0.428	1	0.1702	0.5345		1	BTB-00016701	2	1	DOM	6/8	185/86	0.07614		1	BTB-00016701	2	1	REC	2/12	47/224	1
1	BovineHD0100010010	35346762	1	0.3571	0.4981	2	0.1757	0.5598		1	BovineHD0100010010	1	2	DOM	8/6	197/65	0.2044		1	BovineHD0100010010	1	2	REC	2/12	64/198	0.5298
1	BovineHD0100010011	35347543	2	0.3571	0.4943	1	0.1777	0.5684		1	BovineHD0100010011	2	1	DOM	8/6	196/66	0.2067		1	BovineHD0100010011	2	1	REC	2/12	63/199	0.531
1	BovineHD0100010012	35348417	1	0.3571	0.4943	2	0.1777	0.5683		1	BovineHD0100010012	1	2	DOM	8/6	198/67	0.2074		1	BovineHD0100010012	1	2	REC	2/12	64/201	0.5308
1	BovineHD0100010019	35371662	2	0.03571	0.09815	1	0.5038	0.3403		1	BovineHD0100010019	2	1	DOM	1/13	50/220	0.477		1	BovineHD0100010019	2	1	REC	0/14	3/267	1
1	BovineHD0100010029	35401745	1	0.1786	0.3981	2	0.0269	0.3286		1	BovineHD0100010029	1	2	DOM	5/9	174/96	0.04424		1	BovineHD0100010029	1	2	REC	0/14	41/229	0.2333
1	DPI-55	35424977	1	0	0.1389	2	0.03879	0		1	DPI-55	1	2	DOM	0/14	70/200	0.02491		1	DPI-55	1	2	REC	0/14	5/265	1
1	BovineHD0100010042	35440283	1	0.1786	0.4033	2	0.01729	0.3216		1	BovineHD0100010042	1	2	DOM	5/9	176/93	0.04152		1	BovineHD0100010042	1	2	REC	0/14	41/228	0.2336
1	BovineHD0100010051	35462050	1	0.3571	0.3123	2	0.6771	1.224		1	BovineHD0100010051	1	2	DOM	8/6	137/132	0.7861		1	BovineHD0100010051	1	2	REC	2/12	31/238	0.6712
1	BovineHD0100010072	35546605	2	0.3214	0.3611	1	0.8403	0.8381		1	BovineHD0100010072	2	1	DOM	8/6	163/107	0.7878		1	BovineHD0100010072	2	1	REC	1/13	32/238	1
1	Hapmap32018-BTA-123851	35567873	2	0.2857	0.1716	1	0.1298	1.931		1	Hapmap32018-BTA-123851	2	1	DOM	6/8	82/189	0.3754		1	Hapmap32018-BTA-123851	2	1	REC	2/12	11/260	0.1282
1	BovineHD0100010132	35686183	1	0.3214	0.2389	2	0.3652	1.509		1	BovineHD0100010132	1	2	DOM	8/6	110/160	0.2705		1	BovineHD0100010132	1	2	REC	1/13	19/251	1
1	BTB-00016898	35722253	2	0	0.1033	1	0.09802	0		1	BTB-00016898	2	1	DOM	0/14	54/217	0.07967		1	BTB-00016898	2	1	REC	0/14	2/269	1
1	BTB-00016906	35774336	2	0.03571	0.179	1	0.06743	0.1699		1	BTB-00016906	2	1	DOM	1/13	91/180	0.04166		1	BTB-00016906	2	1	REC	0/14	6/265	1
1	ARS-BFGL-NGS-60721	35809354	1	0.3214	0.2159	2	0.2399	1.721		1	ARS-BFGL-NGS-60721	1	2	DOM	8/6	101/170	0.1624		1	ARS-BFGL-NGS-60721	1	2	REC	1/13	16/255	0.586
1	BovineHD0100010183	35833095	1	0.3571	0.283	2	0.3966	1.407		1	BovineHD0100010183	1	2	DOM	8/6	122/143	0.4276		1	BovineHD0100010183	1	2	REC	2/12	28/237	0.6525
1	BovineHD0100010199	35884896	1	0.1429	0.2759	2	0.1876	0.4374		1	BovineHD0100010199	1	2	DOM	4/10	124/146	0.2736		1	BovineHD0100010199	1	2	REC	0/14	25/245	0.6207
1	BovineHD0100010213	35933171	1	0.3214	0.2695	2	0.5206	1.284		1	BovineHD0100010213	1	2	DOM	7/7	121/148	0.7867		1	BovineHD0100010213	1	2	REC	2/12	24/245	0.3749
1	BovineHD0100010229	35976438	2	0.1429	0.2602	1	0.1888	0.4738		1	BovineHD0100010229	2	1	DOM	4/10	118/151	0.4073		1	BovineHD0100010229	2	1	REC	0/14	22/247	0.6111
1	DPI-2	36007508	2	0.1071	0.1476	1	0.784	0.693		1	DPI-2	2	1	DOM	3/11	72/199	1		1	DPI-2	2	1	REC	0/14	8/263	1
1	BovineHD0100010243	36026109	1	0.3571	0.4317	2	0.5577	0.7312		1	BovineHD0100010243	1	2	DOM	9/5	186/85	0.7711		1	BovineHD0100010243	1	2	REC	1/13	48/223	0.4766
1	BTB-00017157	36215840	2	0.1071	0.1439	1	0.7837	0.7138		1	BTB-00017157	2	1	DOM	3/11	70/201	1		1	BTB-00017157	2	1	REC	0/14	8/263	1
1	BovineHD0100010274	36241055	2	0.6071	0.4594	1	0.1731	1.819		1	BovineHD0100010274	2	1	DOM	12/2	187/84	0.2413		1	BovineHD0100010274	2	1	REC	5/9	62/209	0.3296
1	BovineHD0100010279	36271350	2	0.1071	0.1311	1	1	0.7954		1	BovineHD0100010279	2	1	DOM	3/11	64/203	1		1	BovineHD0100010279	2	1	REC	0/14	6/261	1
1	Hapmap40144-BTA-79228	36294078	1	0	0.01481	2	1	0		1	Hapmap40144-BTA-79228	1	2	DOM	0/14	8/262	1		1	Hapmap40144-BTA-79228	1	2	REC	0/14	0/270	1
1	BovineHD0100010292	36303690	2	0.2857	0.4682	1	0.07876	0.4544		1	BovineHD0100010292	2	1	DOM	6/8	185/82	0.0728		1	BovineHD0100010292	2	1	REC	2/12	65/202	0.5302
1	BovineHD0100010297	36315758	2	0.3929	0.3407	1	0.5484	1.252		1	BovineHD0100010297	2	1	DOM	9/5	153/117	0.7831		1	BovineHD0100010297	2	1	REC	2/12	31/239	0.6703
1	Hapmap41641-BTA-79222	36352663	1	0.5357	0.4631	2	0.5609	1.338		1	Hapmap41641-BTA-79222	1	2	DOM	11/3	194/77	0.7637		1	Hapmap41641-BTA-79222	1	2	REC	4/10	57/214	0.5077
1	BTB-00017988	36393512	1	0.25	0.3838	2	0.168	0.5353		1	BTB-00017988	1	2	DOM	5/9	161/110	0.09796		1	BTB-00017988	1	2	REC	2/12	47/224	1
1	BovineHD0100010321	36401673	1	0.3571	0.3056	2	0.5369	1.263		1	BovineHD0100010321	1	2	DOM	8/6	141/129	0.789		1	BovineHD0100010321	1	2	REC	2/12	24/246	0.3732
1	BovineHD0100010328	36426174	1	0.25	0.263	2	1	0.9343		1	BovineHD0100010328	1	2	DOM	6/8	125/145	1		1	BovineHD0100010328	1	2	REC	1/13	17/253	0.609
1	ARS-BFGL-BAC-4996	36459510	1	0.3571	0.2989	2	0.5295	1.303		1	ARS-BFGL-BAC-4996	1	2	DOM	8/6	138/133	0.7861		1	ARS-BFGL-BAC-4996	1	2	REC	2/12	24/247	0.3714
1	Hapmap57330-rs29009759	36486706	1	0.07143	0.1734	2	0.2009	0.3666		1	Hapmap57330-rs29009759	1	2	DOM	2/12	88/183	0.2382		1	Hapmap57330-rs29009759	1	2	REC	0/14	6/265	1
1	BTA-79216-no-rs	36519957	2	0.03571	0.04613	1	1	0.7659		1	BTA-79216-no-rs	2	1	DOM	1/13	24/247	1		1	BTA-79216-no-rs	2	1	REC	0/14	1/270	1
1	BovineHD0100010364	36554587	1	0.4643	0.4981	2	0.8468	0.8731		1	BovineHD0100010364	1	2	DOM	9/5	197/73	0.5405		1	BovineHD0100010364	1	2	REC	4/10	72/198	1
1	BTB-00017697	36582476	1	0.03571	0.06827	2	1	0.5055		1	BTB-00017697	1	2	DOM	1/13	36/235	1		1	BTB-00017697	1	2	REC	0/14	1/270	1
1	ARS-BFGL-BAC-11284	36610037	1	0.25	0.4041	2	0.1163	0.4916		1	ARS-BFGL-BAC-11284	1	2	DOM	6/8	173/98	0.1551		1	ARS-BFGL-BAC-11284	1	2	REC	1/13	46/225	0.4787
1	ARS-BFGL-NGS-116207	36639642	2	0.2143	0.3321	1	0.2212	0.5485		1	ARS-BFGL-NGS-116207	2	1	DOM	5/9	150/121	0.1758		1	ARS-BFGL-NGS-116207	2	1	REC	1/13	30/241	1
1	Hapmap50474-BTA-79209	36666981	2	0	0.02214	1	1	0		1	Hapmap50474-BTA-79209	2	1	DOM	0/14	12/259	1		1	Hapmap50474-BTA-79209	2	1	REC	0/14	0/271	1
1	BovineHD0100010393	36673470	1	0.7143	0.4465	2	0.006267	3.099		1	BovineHD0100010393	1	2	DOM	13/1	180/91	0.04166		1	BovineHD0100010393	1	2	REC	7/7	62/209	0.04752
1	BTB-00017422	36693898	2	0.1071	0.1956	1	0.3278	0.4936		1	BTB-00017422	2	1	DOM	3/11	91/180	0.5606		1	BTB-00017422	2	1	REC	0/14	15/256	1
1	BovineHD0100010400	36708125	2	0.3929	0.3759	1	0.8442	1.074		1	BovineHD0100010400	2	1	DOM	9/5	161/109	0.7878		1	BovineHD0100010400	2	1	REC	2/12	42/228	1
1	BovineHD0100010416	36791630	1	0.07143	0.2823	2	0.01478	0.1956		1	BovineHD0100010416	1	2	DOM	2/12	136/135	0.01147		1	BovineHD0100010416	1	2	REC	0/14	17/254	1
1	Hapmap43356-BTA-79201	36796167	1	0.03571	0.1771	2	0.06691	0.1721		1	Hapmap43356-BTA-79201	1	2	DOM	1/13	88/183	0.07151		1	Hapmap43356-BTA-79201	1	2	REC	0/14	8/263	1
1	BovineHD0100010421	36813260	2	0.3214	0.4465	1	0.2425	0.5872		1	BovineHD0100010421	2	1	DOM	7/7	179/92	0.2539		1	BovineHD0100010421	2	1	REC	2/12	63/208	0.7436
1	BovineHD0100010461	36943147	2	0.6071	0.4188	1	0.07617	2.145		1	BovineHD0100010461	2	1	DOM	12/2	166/105	0.08885		1	BovineHD0100010461	2	1	REC	5/9	61/210	0.3259
1	Hapmap50634-BTA-26738	36991506	2	0.3571	0.3266	1	0.8367	1.146		1	Hapmap50634-BTA-26738	2	1	DOM	8/6	148/123	1		1	Hapmap50634-BTA-26738	2	1	REC	2/12	29/242	0.655
1	BovineHD0100010491	37050569	2	0.1071	0.1421	1	0.7838	0.7247		1	BovineHD0100010491	2	1	DOM	3/11	70/201	1		1	BovineHD0100010491	2	1	REC	0/14	7/264	1
1	Hapmap49369-BTA-89952	37219767	1	0.3214	0.3506	2	0.8409	0.8776		1	Hapmap49369-BTA-89952	1	2	DOM	7/7	157/114	0.5888		1	Hapmap49369-BTA-89952	1	2	REC	2/12	33/238	0.6847
1	BovineHD0100010528	37232068	2	0.2857	0.2082	1	0.3436	1.521		1	BovineHD0100010528	2	1	DOM	6/8	99/170	0.7777		1	BovineHD0100010528	2	1	REC	2/12	13/256	0.165
1	BovineHD0100010535	37260062	2	0.3214	0.4077	1	0.4325	0.688		1	BovineHD0100010535	2	1	DOM	7/7	179/92	0.2539		1	BovineHD0100010535	2	1	REC	2/12	42/229	1
1	BTA-115758-no-rs	37299219	2	0	0.1015	1	0.09745	0		1	BTA-115758-no-rs	2	1	DOM	0/14	53/218	0.08017		1	BTA-115758-no-rs	2	1	REC	0/14	2/269	1
1	BovineHD0100010565	37336681	2	0.3929	0.4205	1	0.8459	0.8919		1	BovineHD0100010565	2	1	DOM	8/6	176/88	0.5634		1	BovineHD0100010565	2	1	REC	3/11	46/218	0.7188
1	BovineHD0100010579	37359664	1	0.3214	0.2528	2	0.5048	1.4		1	BovineHD0100010579	1	2	DOM	7/7	119/152	0.7843		1	BovineHD0100010579	1	2	REC	2/12	18/253	0.2565
1	BovineHD0100010581	37368303	1	0.1071	0.1245	2	1	0.8436		1	BovineHD0100010581	1	2	DOM	3/11	63/202	1		1	BovineHD0100010581	1	2	REC	0/14	3/262	1
1	DPI-27	37381473	1	0.3929	0.3081	2	0.403	1.453		1	DPI-27	1	2	DOM	9/5	138/133	0.4155		1	DPI-27	1	2	REC	2/12	29/242	0.655
1	BTA-111760-no-rs	37412751	1	0.07143	0.07011	2	1	1.02		1	BTA-111760-no-rs	1	2	DOM	2/12	37/234	1		1	BTA-111760-no-rs	1	2	REC	0/14	1/270	1
1	BovineHD4100000204	37455994	1	0.4286	0.3487	2	0.4199	1.401		1	BovineHD4100000204	1	2	DOM	10/4	153/118	0.4071		1	BovineHD4100000204	1	2	REC	2/12	36/235	1
1	Hapmap46343-BTA-111768	37513415	2	0.4286	0.3561	1	0.4275	1.356		1	Hapmap46343-BTA-111768	2	1	DOM	10/4	157/114	0.4097		1	Hapmap46343-BTA-111768	2	1	REC	2/12	36/235	1
1	BTA-111771-no-rs	37570425	2	0.4286	0.4019	1	0.8442	1.116		1	BTA-111771-no-rs	2	1	DOM	10/4	170/100	0.5844		1	BTA-111771-no-rs	2	1	REC	2/12	47/223	1
1	BovineHD0100010640	37575077	1	0.2143	0.3346	2	0.2198	0.5424		1	BovineHD0100010640	1	2	DOM	5/9	143/123	0.2721		1	BovineHD0100010640	1	2	REC	1/13	35/231	1
1	ARS-BFGL-NGS-84905	37606303	2	0.2857	0.3667	1	0.4275	0.6909		1	ARS-BFGL-NGS-84905	2	1	DOM	7/7	156/114	0.5899		1	ARS-BFGL-NGS-84905	2	1	REC	1/13	42/228	0.7021
1	BTA-120277-no-rs	37642573	1	0.1429	0.1919	2	0.6283	0.7019		1	BTA-120277-no-rs	1	2	DOM	4/10	86/185	1		1	BTA-120277-no-rs	1	2	REC	0/14	18/253	1
1	BovineHD0100010694	37723915	2	0.4286	0.4887	1	0.5663	0.7847		1	BovineHD0100010694	2	1	DOM	10/4	194/71	1		1	BovineHD0100010694	2	1	REC	2/12	65/200	0.5296
1	BovineHD4100000205	37780384	1	0.3214	0.3303	2	1	0.9606		1	BovineHD4100000205	1	2	DOM	7/7	145/126	1		1	BovineHD4100000205	1	2	REC	2/12	34/237	0.6926
1	BovineHD0100010740	37812572	2	0.4286	0.461	1	0.8465	0.877		1	BovineHD0100010740	2	1	DOM	10/4	192/77	1		1	BovineHD0100010740	2	1	REC	2/12	56/213	0.742
1	BovineHD0100010753	37875353	2	0.3214	0.2435	1	0.3705	1.472		1	BovineHD0100010753	2	1	DOM	7/7	111/158	0.5837		1	BovineHD0100010753	2	1	REC	2/12	20/249	0.2979
1	BovineHD0100010754	37876071	2	0.3214	0.2538	1	0.5051	1.393		1	BovineHD0100010754	2	1	DOM	7/7	113/151	0.5943		1	BovineHD0100010754	2	1	REC	2/12	21/243	0.3253
1	Hapmap42111-BTA-122184	37900339	2	0	0.01107	1	1	0		1	Hapmap42111-BTA-122184	2	1	DOM	0/14	6/265	1		1	Hapmap42111-BTA-122184	2	1	REC	0/14	0/271	1
1	ARS-BFGL-NGS-23720	37942216	2	0.3929	0.3893	1	1	1.015		1	ARS-BFGL-NGS-23720	2	1	DOM	8/6	168/103	0.7809		1	ARS-BFGL-NGS-23720	2	1	REC	3/11	43/228	0.4795
1	ARS-BFGL-NGS-53463	38076935	2	0.3214	0.2343	1	0.3614	1.548		1	ARS-BFGL-NGS-53463	2	1	DOM	7/7	109/162	0.5791		1	ARS-BFGL-NGS-53463	2	1	REC	2/12	18/253	0.2565
1	BovineHD0100010842	38112817	2	0.2143	0.2876	1	0.5205	0.6756		1	BovineHD0100010842	2	1	DOM	5/9	131/135	0.4147		1	BovineHD0100010842	2	1	REC	1/13	22/244	1
1	BovineHD0100010886	38222228	1	0.3929	0.4599	2	0.5617	0.7598		1	BovineHD0100010886	1	2	DOM	10/4	186/76	1		1	BovineHD0100010886	1	2	REC	1/13	55/207	0.3139
1	ARS-BFGL-NGS-100005	38262971	1	0.3929	0.3524	2	0.6879	1.189		1	ARS-BFGL-NGS-100005	1	2	DOM	9/5	155/116	0.7832		1	ARS-BFGL-NGS-100005	1	2	REC	2/12	36/235	1
1	ARS-BFGL-NGS-114608	38309499	1	0.4643	0.4142	2	0.695	1.226		1	ARS-BFGL-NGS-114608	1	2	DOM	10/4	171/97	0.7763		1	ARS-BFGL-NGS-114608	1	2	REC	3/11	51/217	0.7358
1	BovineHD0100010966	38434232	1	0.1429	0.2226	2	0.4806	0.5819		1	BovineHD0100010966	1	2	DOM	4/10	105/160	0.5762		1	BovineHD0100010966	1	2	REC	0/14	13/252	1
1	BovineHD0100010977	38490335	1	0.3571	0.303	2	0.5337	1.278		1	BovineHD0100010977	1	2	DOM	8/6	135/134	0.7853		1	BovineHD0100010977	1	2	REC	2/12	28/241	0.6496
1	BovineHD0100011008	38597502	2	0.1429	0.1734	1	0.8023	0.7943		1	BovineHD0100011008	2	1	DOM	4/10	86/185	1		1	BovineHD0100011008	2	1	REC	0/14	8/263	1
1	ARS-BFGL-NGS-42813	38630217	2	0.2857	0.2362	1	0.5042	1.294		1	ARS-BFGL-NGS-42813	2	1	DOM	6/8	109/162	1		1	ARS-BFGL-NGS-42813	2	1	REC	2/12	19/252	0.2757
1	BovineHD0100011029	38649320	1	0.5	0.4586	2	0.7008	1.18		1	BovineHD0100011029	1	2	DOM	10/4	176/90	0.7794		1	BovineHD0100011029	1	2	REC	4/10	68/198	0.7602
1	BovineHD0100011034	38673068	1	0.3214	0.2955	2	0.8323	1.13		1	BovineHD0100011034	1	2	DOM	7/7	130/134	1		1	BovineHD0100011034	1	2	REC	2/12	26/238	0.6398
1	ARS-BFGL-NGS-85768	38707374	2	0.03571	0.07749	1	0.7134	0.4409		1	ARS-BFGL-NGS-85768	2	1	DOM	1/13	39/232	0.7005		1	ARS-BFGL-NGS-85768	2	1	REC	0/14	3/268	1
1	BTA-16749-no-rs	38752163	1	0	0.07196	2	0.2469	0		1	BTA-16749-no-rs	1	2	DOM	0/14	37/234	0.2282		1	BTA-16749-no-rs	1	2	REC	0/14	2/269	1
1	Hapmap51081-BTA-89053	38776974	1	0	0.01296	2	1	0		1	Hapmap51081-BTA-89053	1	2	DOM	0/14	7/263	1		1	Hapmap51081-BTA-89053	1	2	REC	0/14	0/270	1
1	BovineHD0100011072	38816049	2	0.2143	0.321	1	0.2993	0.5768		1	BovineHD0100011072	2	1	DOM	4/10	147/124	0.09664		1	BovineHD0100011072	2	1	REC	2/12	27/244	0.6417
1	BovineHD0100011079	38856511	1	0.2143	0.3008	2	0.4002	0.6341		1	BovineHD0100011079	1	2	DOM	4/10	130/136	0.1742		1	BovineHD0100011079	1	2	REC	2/12	30/236	0.6662
1	BovineHD0100011092	38919419	1	0.1071	0.1823	2	0.4482	0.5381		1	BovineHD0100011092	1	2	DOM	3/11	88/178	0.5594		1	BovineHD0100011092	1	2	REC	0/14	9/257	1
1	BovineHD0100011097	38944944	1	0.1786	0.2698	2	0.3811	0.5883		1	BovineHD0100011097	1	2	DOM	4/10	124/141	0.2714		1	BovineHD0100011097	1	2	REC	1/13	19/246	1
1	BovineHD0100011107	38985194	2	0.1786	0.2962	1	0.2067	0.5165		1	BovineHD0100011107	2	1	DOM	4/10	131/134	0.1717		1	BovineHD0100011107	2	1	REC	1/13	26/239	1
1	ARS-BFGL-NGS-97815	39014333	1	0.3571	0.2952	2	0.5264	1.326		1	ARS-BFGL-NGS-97815	1	2	DOM	8/6	129/142	0.5874		1	ARS-BFGL-NGS-97815	1	2	REC	2/12	31/240	0.6695
1	BovineHD0100011117	39054297	2	0.25	0.3459	1	0.4134	0.6304		1	BovineHD0100011117	2	1	DOM	6/8	152/114	0.4079		1	BovineHD0100011117	2	1	REC	1/13	32/234	1
1	BovineHD0100011134	39142467	2	0.5357	0.4792	1	0.5679	1.254		1	BovineHD0100011134	2	1	DOM	11/3	187/77	0.7634		1	BovineHD0100011134	2	1	REC	4/10	66/198	0.756
1	BTA-109574-no-rs	39198219	2	0.6071	0.3819	1	0.02728	2.501		1	BTA-109574-no-rs	2	1	DOM	12/2	162/109	0.08808		1	BTA-109574-no-rs	2	1	REC	5/9	45/226	0.0777
1	Hapmap39970-BTA-117984	39249574	1	0.3214	0.2565	2	0.5069	1.373		1	Hapmap39970-BTA-117984	1	2	DOM	8/6	120/151	0.4138		1	Hapmap39970-BTA-117984	1	2	REC	1/13	19/252	1
1	ARS-BFGL-NGS-26011	39292042	1	0.3929	0.3247	2	0.5361	1.346		1	ARS-BFGL-NGS-26011	1	2	DOM	9/5	143/128	0.4273		1	ARS-BFGL-NGS-26011	1	2	REC	2/12	33/238	0.6847
1	BTA-96881-no-rs	39365760	2	0.3929	0.2823	1	0.2059	1.645		1	BTA-96881-no-rs	2	1	DOM	9/5	129/142	0.2776		1	BTA-96881-no-rs	2	1	REC	2/12	24/247	0.3714
1	BovineHD0100011202	39399871	1	0.3929	0.3155	2	0.4093	1.404		1	BovineHD0100011202	1	2	DOM	9/5	140/131	0.4192		1	BovineHD0100011202	1	2	REC	2/12	31/240	0.6695
1	BovineHD0100011251	39585612	1	0.3929	0.4981	2	0.3339	0.6519		1	BovineHD0100011251	1	2	DOM	10/4	202/64	0.7502		1	BovineHD0100011251	1	2	REC	1/13	63/203	0.202
1	BovineHD0100011262	39638269	1	0.2857	0.2838	2	1	1.009		1	BovineHD0100011262	1	2	DOM	8/6	129/137	0.5913		1	BovineHD0100011262	1	2	REC	0/14	22/244	0.6115
1	Hapmap47738-BTA-79246	39643915	2	0.25	0.3093	1	0.6746	0.7445		1	Hapmap47738-BTA-79246	2	1	DOM	6/8	141/129	0.588		1	Hapmap47738-BTA-79246	2	1	REC	1/13	26/244	1
1	ARS-BFGL-BAC-12579	39724349	1	0.5	0.4742	2	0.8475	1.109		1	ARS-BFGL-BAC-12579	1	2	DOM	10/4	192/79	1		1	ARS-BFGL-BAC-12579	1	2	REC	4/10	65/206	0.7499
1	BovineHD0100011299	39791496	2	0.3571	0.3996	1	0.6973	0.8346		1	BovineHD0100011299	2	1	DOM	8/6	172/97	0.5838		1	BovineHD0100011299	2	1	REC	2/12	43/226	1
1	Hapmap27571-BTA-123885	39883372	1	0.25	0.3463	2	0.4137	0.6292		1	Hapmap27571-BTA-123885	1	2	DOM	5/9	154/116	0.1666		1	Hapmap27571-BTA-123885	1	2	REC	2/12	33/237	0.6857
1	ARS-BFGL-NGS-107020	39954780	1	0.3929	0.2362	2	0.071	2.093		1	ARS-BFGL-NGS-107020	1	2	DOM	10/4	110/161	0.02759		1	ARS-BFGL-NGS-107020	1	2	REC	1/13	18/253	1
1	BovineHD0100011370	39999162	1	0.25	0.4608	2	0.03216	0.39		1	BovineHD0100011370	1	2	DOM	6/8	187/81	0.04254		1	BovineHD0100011370	1	2	REC	1/13	60/208	0.3154
1	BovineHD0100011377	40023410	2	0.5	0.468	1	0.8466	1.137		1	BovineHD0100011377	2	1	DOM	10/4	192/74	1		1	BovineHD0100011377	2	1	REC	4/10	57/209	0.5134
1	BTB-00018760	40036006	2	0.3571	0.3413	1	0.8409	1.072		1	BTB-00018760	2	1	DOM	8/6	153/118	1		1	BTB-00018760	2	1	REC	2/12	32/239	0.677
1	Hapmap38790-BTA-87413	40075624	2	0.5714	0.4176	1	0.1196	1.859		1	Hapmap38790-BTA-87413	2	1	DOM	12/2	175/92	0.1519		1	Hapmap38790-BTA-87413	2	1	REC	4/10	48/219	0.3007
1	BovineHD0100011399	40135823	1	0.1429	0.1805	2	0.8015	0.7569		1	BovineHD0100011399	1	2	DOM	4/10	86/180	1		1	BovineHD0100011399	1	2	REC	0/14	10/256	1
1	ARS-BFGL-BAC-13195	40136994	1	0.03571	0.07963	2	0.7147	0.4281		1	ARS-BFGL-BAC-13195	1	2	DOM	1/13	41/229	0.7012		1	ARS-BFGL-BAC-13195	1	2	REC	0/14	2/268	1
1	BTB-01806368	40162427	1	0.2857	0.4244	2	0.1716	0.5426		1	BTB-01806368	1	2	DOM	6/8	175/96	0.1518		1	BTB-01806368	1	2	REC	2/12	55/216	0.7433
1	ARS-BFGL-NGS-34353	40189561	2	0.1429	0.163	1	1	0.8561		1	ARS-BFGL-NGS-34353	2	1	DOM	4/10	80/190	1		1	ARS-BFGL-NGS-34353	2	1	REC	0/14	8/262	1
1	BTB-00018513	40216456	2	0.03571	0.07963	1	0.7147	0.4281		1	BTB-00018513	2	1	DOM	1/13	41/229	0.7012		1	BTB-00018513	2	1	REC	0/14	2/268	1
1	ARS-BFGL-NGS-20360	40253747	1	0.03571	0.07778	2	0.7135	0.4392		1	ARS-BFGL-NGS-20360	1	2	DOM	1/13	40/230	0.7006		1	ARS-BFGL-NGS-20360	1	2	REC	0/14	2/268	1
1	BTB-00018431	40278698	1	0.6071	0.4889	2	0.2488	1.615		1	BTB-00018431	1	2	DOM	12/2	196/75	0.365		1	BTB-00018431	1	2	REC	5/9	69/202	0.3663
1	BTB-00018408	40296142	1	0.2857	0.1845	2	0.2133	1.768		1	BTB-00018408	1	2	DOM	6/8	88/183	0.4008		1	BTB-00018408	1	2	REC	2/12	12/259	0.1454
1	BTB-01249999	40420207	2	0.3214	0.3266	1	1	0.9768		1	BTB-01249999	2	1	DOM	7/7	149/122	0.7868		1	BTB-01249999	2	1	REC	2/12	28/243	0.6482
1	BTA-117821-no-rs	40452500	2	0.1071	0.2731	1	0.07592	0.3195		1	BTA-117821-no-rs	2	1	DOM	3/11	133/138	0.05492		1	BTA-117821-no-rs	2	1	REC	0/14	15/256	1
1	BovineHD0100011469	40467149	2	0.3571	0.4267	1	0.5581	0.7465		1	BovineHD0100011469	2	1	DOM	8/6	185/81	0.377		1	BovineHD0100011469	2	1	REC	2/12	42/224	1
1	BTB-01250106	40506922	2	0.3929	0.2678	1	0.1901	1.769		1	BTB-01250106	2	1	DOM	7/7	126/141	1		1	BTB-01250106	2	1	REC	4/10	17/250	0.01422
1	ARS-BFGL-NGS-86662	40576723	1	0.5	0.4779	2	0.8483	1.093		1	ARS-BFGL-NGS-86662	1	2	DOM	10/4	196/75	1		1	ARS-BFGL-NGS-86662	1	2	REC	4/10	63/208	0.7463
1	ARS-BFGL-BAC-13216	40629765	2	0.4643	0.4613	1	1	1.012		1	ARS-BFGL-BAC-13216	2	1	DOM	10/4	185/86	1		1	ARS-BFGL-BAC-13216	2	1	REC	3/11	65/206	1
1	BovineHD0100011507	40652007	2	0.07143	0.04699	1	0.6385	1.56		1	BovineHD0100011507	2	1	DOM	2/12	23/243	0.361		1	BovineHD0100011507	2	1	REC	0/14	2/264	1
1	ARS-BFGL-NGS-23908	40691521	2	0	0.05224	1	0.3879	0		1	ARS-BFGL-NGS-23908	2	1	DOM	0/14	27/241	0.3753		1	ARS-BFGL-NGS-23908	2	1	REC	0/14	1/267	1
1	BTB-01250420	40721810	1	0.07143	0.04244	2	0.351	1.736		1	BTB-01250420	1	2	DOM	2/12	21/250	0.3141		1	BTB-01250420	1	2	REC	0/14	2/269	1
1	BovineHD0100011523	40725446	2	0.2857	0.3472	1	0.5486	0.7522		1	BovineHD0100011523	2	1	DOM	6/8	153/112	0.2842		1	BovineHD0100011523	2	1	REC	2/12	31/234	0.6747
1	Hapmap45471-BTA-117823	40748287	1	0.6429	0.4797	2	0.1202	1.952		1	Hapmap45471-BTA-117823	1	2	DOM	13/1	191/80	0.1236		1	Hapmap45471-BTA-117823	1	2	REC	5/9	69/202	0.3663
1	BTB-01250478	40763708	2	0.3929	0.297	1	0.2947	1.531		1	BTB-01250478	2	1	DOM	10/4	131/140	0.1064		1	BTB-01250478	2	1	REC	1/13	30/241	1
1	ARS-BFGL-NGS-111921	40795725	2	0.1786	0.3247	1	0.1439	0.4521		1	ARS-BFGL-NGS-111921	2	1	DOM	4/10	145/126	0.09825		1	ARS-BFGL-NGS-111921	2	1	REC	1/13	31/240	1
1	BovineHD0100011535	40811598	2	0.1786	0.3307	1	0.1012	0.4399		1	BovineHD0100011535	2	1	DOM	4/10	139/118	0.0966		1	BovineHD0100011535	2	1	REC	1/13	31/226	1
1	BTB-01952363	40834252	2	0.3571	0.2768	1	0.3893	1.452		1	BTB-01952363	2	1	DOM	7/7	132/139	1		1	BTB-01952363	2	1	REC	3/11	18/253	0.07408
1	BTA-111731-no-rs	40864128	2	0	0.0369	1	0.6158	0		1	BTA-111731-no-rs	2	1	DOM	0/14	20/251	0.6087		1	BTA-111731-no-rs	2	1	REC	0/14	0/271	1
1	ARS-BFGL-NGS-32825	40909078	1	0.3571	0.2749	2	0.3876	1.465		1	ARS-BFGL-NGS-32825	1	2	DOM	8/6	125/146	0.5844		1	ARS-BFGL-NGS-32825	1	2	REC	2/12	24/247	0.3714
1	BTB-01462455	40956637	2	0	0.04815	1	0.6317	0		1	BTB-01462455	2	1	DOM	0/14	26/244	0.6253		1	BTB-01462455	2	1	REC	0/14	0/270	1
1	Hapmap34927-BES7_Contig453_1164	40987746	2	0.07143	0.2	1	0.1375	0.3077		1	Hapmap34927-BES7_Contig453_1164	2	1	DOM	2/12	94/176	0.1508		1	Hapmap34927-BES7_Contig453_1164	2	1	REC	0/14	14/256	1
1	Hapmap38709-BTA-88324	41023006	2	0.07143	0.1439	1	0.4056	0.4576		1	Hapmap38709-BTA-88324	2	1	DOM	2/12	74/197	0.3667		1	Hapmap38709-BTA-88324	2	1	REC	0/14	4/267	1
1	ARS-BFGL-NGS-100232	41088436	2	0.07143	0.19	1	0.1373	0.3279		1	ARS-BFGL-NGS-100232	2	1	DOM	2/12	90/181	0.239		1	ARS-BFGL-NGS-100232	2	1	REC	0/14	13/258	1
1	BTB-01555269	41160880	2	0.4643	0.3801	1	0.4269	1.414		1	BTB-01555269	2	1	DOM	10/4	162/109	0.5767		1	BTB-01555269	2	1	REC	3/11	44/227	0.7093
1	BovineHD0100046971	41184151	1	0.3571	0.3542	2	1	1.013		1	BovineHD0100046971	1	2	DOM	9/5	145/119	0.5877		1	BovineHD0100046971	1	2	REC	1/13	42/222	0.7032
1	BTB-01555328	41196178	2	0.25	0.4185	1	0.1134	0.4631		1	BTB-01555328	2	1	DOM	6/8	175/95	0.1509		1	BTB-01555328	2	1	REC	1/13	51/219	0.478
1	BovineHD0100011631	41216415	2	0.3571	0.4771	1	0.2471	0.6089		1	BovineHD0100011631	2	1	DOM	8/6	185/77	0.3687		1	BovineHD0100011631	2	1	REC	2/12	65/197	0.529
1	ARS-BFGL-NGS-45335	41245618	2	0.25	0.4262	1	0.07732	0.4488		1	ARS-BFGL-NGS-45335	2	1	DOM	6/8	178/93	0.09225		1	ARS-BFGL-NGS-45335	2	1	REC	1/13	53/218	0.4812
1	BTB-01135685	41366993	2	0.2857	0.1624	1	0.1153	2.064		1	BTB-01135685	2	1	DOM	6/8	77/194	0.2429		1	BTB-01135685	2	1	REC	2/12	11/260	0.1282
1	BovineHD0100011712	41428053	1	0.3214	0.2688	2	0.5196	1.289		1	BovineHD0100011712	1	2	DOM	7/7	120/146	0.787		1	BovineHD0100011712	1	2	REC	2/12	23/243	0.361
1	BTB-01135743	41433644	2	0.2857	0.2278	1	0.4917	1.356		1	BTB-01135743	2	1	DOM	6/8	107/163	0.7878		1	BTB-01135743	2	1	REC	2/12	16/254	0.2196
1	Hapmap23514-BTA-150593	41455680	2	0.1429	0.1494	1	1	0.9486		1	Hapmap23514-BTA-150593	2	1	DOM	4/10	72/199	1		1	Hapmap23514-BTA-150593	2	1	REC	0/14	9/262	1
1	Hapmap47786-BTA-95575	41562654	1	0.07143	0.1255	2	0.56	0.5362		1	Hapmap47786-BTA-95575	1	2	DOM	2/12	64/207	0.5333		1	Hapmap47786-BTA-95575	1	2	REC	0/14	4/267	1
1	BovineHD0100011755	41586998	1	0.3571	0.2688	2	0.3832	1.511		1	BovineHD0100011755	1	2	DOM	9/5	119/147	0.1764		1	BovineHD0100011755	1	2	REC	1/13	24/242	1
1	BovineHD0100011761	41618997	2	0.4286	0.3371	1	0.315	1.475		1	BovineHD0100011761	2	1	DOM	10/4	144/120	0.2753		1	BovineHD0100011761	2	1	REC	2/12	34/230	0.6998
1	BovineHD0100011765	41632942	2	0.2857	0.2124	1	0.3505	1.484		1	BovineHD0100011765	2	1	DOM	8/6	99/160	0.1708		1	BovineHD0100011765	2	1	REC	0/14	11/248	1
1	BovineHD0100011774	41670410	1	0.4286	0.392	2	0.6963	1.163		1	BovineHD0100011774	1	2	DOM	10/4	163/101	0.5786		1	BovineHD0100011774	1	2	REC	2/12	44/220	1
1	BTA-95584-no-rs	41686185	1	0.1071	0.203	2	0.329	0.4713		1	BTA-95584-no-rs	1	2	DOM	3/11	97/174	0.3919		1	BTA-95584-no-rs	1	2	REC	0/14	13/258	1
1	BovineHD0100011786	41728692	1	0.4286	0.3477	2	0.419	1.407		1	BovineHD0100011786	1	2	DOM	10/4	149/117	0.285		1	BovineHD0100011786	1	2	REC	2/12	36/230	1
1	Hapmap38486-BTA-30602	41750066	1	0.4643	0.4207	2	0.6971	1.194		1	Hapmap38486-BTA-30602	1	2	DOM	9/5	181/90	1		1	Hapmap38486-BTA-30602	1	2	REC	4/10	47/224	0.2867
1	BovineHD0100011799	41770783	1	0.3929	0.3914	2	1	1.006		1	BovineHD0100011799	1	2	DOM	8/6	169/98	0.7775		1	BovineHD0100011799	1	2	REC	3/11	40/227	0.4564
1	Hapmap38103-BTA-28646	41788052	2	0.3571	0.2159	1	0.1006	2.018		1	Hapmap38103-BTA-28646	2	1	DOM	7/7	107/164	0.5772		1	Hapmap38103-BTA-28646	2	1	REC	3/11	10/261	0.02024
1	BTB-01848824	41835927	1	0.3929	0.3432	2	0.6841	1.238		1	BTB-01848824	1	2	DOM	10/4	149/122	0.2778		1	BTB-01848824	1	2	REC	1/13	37/234	0.7017
1	BTA-122159-no-rs	41860729	1	0.25	0.3967	2	0.1635	0.507		1	BTA-122159-no-rs	1	2	DOM	6/8	169/102	0.1654		1	BTA-122159-no-rs	1	2	REC	1/13	46/225	0.4787
1	BTB-01136210	41886688	1	0.03571	0.1328	2	0.239	0.2418		1	BTB-01136210	1	2	DOM	1/13	70/201	0.2011		1	BTB-01136210	1	2	REC	0/14	2/269	1
1	BovineHD0100011834	41905455	2	0.5357	0.4377	1	0.3338	1.482		1	BovineHD0100011834	2	1	DOM	11/3	186/79	0.7641		1	BovineHD0100011834	2	1	REC	4/10	46/219	0.2871
1	BovineHD0100011840	41922668	2	0.3214	0.2774	1	0.6662	1.234		1	BovineHD0100011840	2	1	DOM	6/8	127/138	0.7885		1	BovineHD0100011840	2	1	REC	3/11	20/245	0.09775
1	ARS-BFGL-NGS-106725	41948372	2	0.25	0.3229	1	0.5345	0.699		1	ARS-BFGL-NGS-106725	2	1	DOM	6/8	153/118	0.4102		1	ARS-BFGL-NGS-106725	2	1	REC	1/13	22/249	1
1	BovineHD0100011849	41949404	1	0.4286	0.4889	2	0.5663	0.784		1	BovineHD0100011849	1	2	DOM	9/5	203/68	0.3599		1	BovineHD0100011849	1	2	REC	3/11	62/209	1
1	Hapmap54599-rs29019617	41978469	2	0.2143	0.3778	1	0.1072	0.4492		1	Hapmap54599-rs29019617	2	1	DOM	4/10	160/110	0.02809		1	Hapmap54599-rs29019617	2	1	REC	2/12	44/226	1
1	ARS-BFGL-NGS-23369	42009799	1	0.3571	0.321	2	0.6826	1.175		1	ARS-BFGL-NGS-23369	1	2	DOM	8/6	145/126	1		1	ARS-BFGL-NGS-23369	1	2	REC	2/12	29/242	0.655
1	1_41754173	42125330	2	0.2143	0.3472	1	0.2184	0.5128		1	1_41754173	2	1	DOM	4/10	147/118	0.05745		1	1_41754173	2	1	REC	2/12	37/228	1
1	1_41768691	42139849	2	0.07143	0.1326	1	0.5618	0.5033		1	1_41768691	2	1	DOM	2/12	65/199	0.5294		1	1_41768691	2	1	REC	0/14	5/259	1
1	Hapmap48210-BTA-120730	42205645	2	0.3929	0.3727	1	0.8431	1.089		1	Hapmap48210-BTA-120730	2	1	DOM	8/6	160/111	1		1	Hapmap48210-BTA-120730	2	1	REC	3/11	42/229	0.4697
1	BovineHD0100011951	42217977	1	0.3571	0.3044	2	0.5355	1.269		1	BovineHD0100011951	1	2	DOM	8/6	142/129	0.7895		1	BovineHD0100011951	1	2	REC	2/12	23/248	0.3524
1	ARS-BFGL-NGS-106432	42264448	2	0.5357	0.4022	1	0.1721	1.715		1	ARS-BFGL-NGS-106432	2	1	DOM	11/3	171/100	0.3924		1	ARS-BFGL-NGS-106432	2	1	REC	4/10	47/224	0.2867
1	ARS-BFGL-BAC-15157	42285326	2	0.4643	0.31	1	0.09757	1.929		1	ARS-BFGL-BAC-15157	2	1	DOM	11/3	138/133	0.05492		1	ARS-BFGL-BAC-15157	2	1	REC	2/12	30/241	0.6621
1	Hapmap50812-BTA-89669	42347846	1	0.25	0.2362	2	0.8223	1.078		1	Hapmap50812-BTA-89669	1	2	DOM	6/8	114/157	1		1	Hapmap50812-BTA-89669	1	2	REC	1/13	14/257	0.5394
1	1_41998867	42370137	2	0.5357	0.4436	1	0.436	1.447		1	1_41998867	2	1	DOM	11/3	181/85	0.5595		1	1_41998867	2	1	REC	4/10	55/211	0.5028
1	BTB-01708786	42513439	2	0.5714	0.3967	1	0.07662	2.028		1	BTB-01708786	2	1	DOM	12/2	165/106	0.0883		1	BTB-01708786	2	1	REC	4/10	50/221	0.3117
1	BovineHD0100012074	42562079	2	0.2857	0.4556	1	0.08297	0.478		1	BovineHD0100012074	2	1	DOM	6/8	192/78	0.03532		1	BovineHD0100012074	2	1	REC	2/12	54/216	1
1	BovineHD0100012062	42600264	1	0	0.126	2	0.03765	0		1	BovineHD0100012062	1	2	DOM	0/14	63/199	0.04481		1	BovineHD0100012062	1	2	REC	0/14	3/259	1
1	BTA-104608-no-rs	42672277	2	0.1071	0.203	1	0.329	0.4713		1	BTA-104608-no-rs	2	1	DOM	3/11	99/172	0.3918		1	BTA-104608-no-rs	2	1	REC	0/14	11/260	1
1	ARS-BFGL-NGS-93346	42776430	1	0.07143	0.2424	2	0.03844	0.2404		1	ARS-BFGL-NGS-93346	1	2	DOM	2/12	113/151	0.04869		1	ARS-BFGL-NGS-93346	1	2	REC	0/14	15/249	1
1	BovineHD0100012112	42827966	1	0.4286	0.382	2	0.6914	1.213		1	BovineHD0100012112	1	2	DOM	9/5	166/101	1		1	BovineHD0100012112	1	2	REC	3/11	38/229	0.4382
1	BTB-00019582	42863111	1	0.2857	0.3985	2	0.3212	0.6037		1	BTB-00019582	1	2	DOM	6/8	169/102	0.1654		1	BTB-00019582	1	2	REC	2/12	47/224	1
1	ARS-BFGL-NGS-10059	42912279	1	0.07143	0.2085	2	0.09158	0.292		1	ARS-BFGL-NGS-10059	1	2	DOM	2/12	101/170	0.09349		1	ARS-BFGL-NGS-10059	1	2	REC	0/14	12/259	1
1	Hapmap53820-rs29010070	42990139	1	0.1429	0.1513	2	1	0.935		1	Hapmap53820-rs29010070	1	2	DOM	4/10	79/192	1		1	Hapmap53820-rs29010070	1	2	REC	0/14	3/268	1
1	BovineHD0100012163	43053603	1	0	0.08555	2	0.1548	0		1	BovineHD0100012163	1	2	DOM	0/14	44/219	0.1363		1	BovineHD0100012163	1	2	REC	0/14	1/262	1
1	BovineHD0100012167	43077482	1	0.4643	0.375	2	0.4242	1.444		1	BovineHD0100012167	1	2	DOM	10/4	162/98	0.5807		1	BovineHD0100012167	1	2	REC	3/11	33/227	0.4062
1	BovineHD0100012169	43080767	1	0.1429	0.1734	2	0.8023	0.7943		1	BovineHD0100012169	1	2	DOM	3/11	86/185	0.56		1	BovineHD0100012169	1	2	REC	1/13	8/263	0.3687
1	BTB-00019705	43090697	1	0.3571	0.3266	2	0.8367	1.146		1	BTB-00019705	1	2	DOM	8/6	148/123	1		1	BTB-00019705	1	2	REC	2/12	29/242	0.655
1	BovineHD0100012176	43101882	2	0.2143	0.2432	1	0.8244	0.8485		1	BovineHD0100012176	2	1	DOM	5/9	110/149	0.7832		1	BovineHD0100012176	2	1	REC	1/13	16/243	0.6027
1	ARS-BFGL-NGS-106220	43119017	1	0.03571	0.1015	2	0.5083	0.3279		1	ARS-BFGL-NGS-106220	1	2	DOM	1/13	53/218	0.4812		1	ARS-BFGL-NGS-106220	1	2	REC	0/14	2/269	1
1	BovineHD0100012187	43129718	1	0.4643	0.4385	2	0.8462	1.11		1	BovineHD0100012187	1	2	DOM	10/4	177/83	1		1	BovineHD0100012187	1	2	REC	3/11	51/209	0.7428
1	BovineHD0100012213	43188983	2	0.6071	0.4636	1	0.1738	1.788		1	BovineHD0100012213	2	1	DOM	12/2	188/73	0.3636		1	BovineHD0100012213	2	1	REC	5/9	54/207	0.1885
1	ARS-BFGL-NGS-12781	43211702	1	0.1786	0.1808	2	1	0.9849		1	ARS-BFGL-NGS-12781	1	2	DOM	4/10	89/182	1		1	ARS-BFGL-NGS-12781	1	2	REC	1/13	9/262	0.4007
1	BovineHD0100012223	43219861	2	0.1429	0.1605	1	1	0.8716		1	BovineHD0100012223	2	1	DOM	3/11	79/192	0.7636		1	BovineHD0100012223	2	1	REC	1/13	8/263	0.3687
1	Hapmap60973-rs29018366	43258943	2	0.4286	0.3838	1	0.6921	1.204		1	Hapmap60973-rs29018366	2	1	DOM	9/5	169/102	1		1	Hapmap60973-rs29018366	2	1	REC	3/11	39/232	0.442
1	BovineHD0100012243	43299897	1	0.2143	0.1502	2	0.4154	1.543		1	BovineHD0100012243	1	2	DOM	5/9	70/193	0.5373		1	BovineHD0100012243	1	2	REC	1/13	9/254	0.4099
1	BovineHD0100012247	43320196	1	0.1071	0.107	2	1	1.001		1	BovineHD0100012247	1	2	DOM	2/12	52/219	1		1	BovineHD0100012247	1	2	REC	1/13	6/265	0.2998
1	BTA-89691-no-rs	43390633	1	0	0.01852	2	1	0		1	BTA-89691-no-rs	1	2	DOM	0/14	10/260	1		1	BTA-89691-no-rs	1	2	REC	0/14	0/270	1
1	BTB-00019912	43428471	1	0.2143	0.2657	2	0.6631	0.7538		1	BTB-00019912	1	2	DOM	5/9	129/142	0.4243		1	BTB-00019912	1	2	REC	1/13	15/256	0.5633
1	Hapmap46502-BTA-89692	43454408	1	0.4643	0.3764	2	0.4251	1.436		1	Hapmap46502-BTA-89692	1	2	DOM	10/4	164/107	0.5765		1	Hapmap46502-BTA-89692	1	2	REC	3/11	40/231	0.4509
1	BovineHD0100012280	43511030	1	0.4286	0.3454	2	0.4172	1.421		1	BovineHD0100012280	1	2	DOM	9/5	147/115	0.5936		1	BovineHD0100012280	1	2	REC	3/11	34/228	0.4115
1	BovineHD0100012296	43581024	2	0.3929	0.4981	1	0.334	0.6519		1	BovineHD0100012296	2	1	DOM	10/4	202/65	0.7519		1	BovineHD0100012296	2	1	REC	1/13	64/203	0.201
1	BTA-20952-no-rs	43637189	2	0.6071	0.4723	1	0.1788	1.727		1	BTA-20952-no-rs	2	1	DOM	13/1	200/71	0.2024		1	BTA-20952-no-rs	2	1	REC	4/10	56/215	0.5027
1	BTA-89708-no-rs	43658641	2	0.3214	0.2878	1	0.6742	1.172		1	BTA-89708-no-rs	2	1	DOM	8/6	140/131	0.7875		1	BTA-89708-no-rs	2	1	REC	1/13	16/255	0.586
1	BovineHD0100012322	43678256	2	0.3929	0.3745	1	0.8436	1.081		1	BovineHD0100012322	2	1	DOM	9/5	162/105	1		1	BovineHD0100012322	2	1	REC	2/12	38/229	1
1	Hapmap47773-BTA-89713	43709324	2	0.1786	0.2804	1	0.2843	0.5578		1	Hapmap47773-BTA-89713	2	1	DOM	5/9	127/144	0.5843		1	Hapmap47773-BTA-89713	2	1	REC	0/14	25/246	0.6204
1	BovineHD0100012336	43726634	1	0.3214	0.3042	2	0.8353	1.084		1	BovineHD0100012336	1	2	DOM	9/5	128/135	0.2849		1	BovineHD0100012336	1	2	REC	0/14	32/231	0.3824
1	BovineHD0100012344	43740582	1	0.3929	0.3467	2	0.685	1.219		1	BovineHD0100012344	1	2	DOM	9/5	155/106	0.7868		1	BovineHD0100012344	1	2	REC	2/12	26/235	0.6417
1	BovineHD0100012362	43774210	2	0.2857	0.2376	1	0.6494	1.283		1	BovineHD0100012362	2	1	DOM	6/8	105/158	1		1	BovineHD0100012362	2	1	REC	2/12	20/243	0.3071
1	BTB-00020638	43787631	2	0.1071	0.1181	1	1	0.8962		1	BTB-00020638	2	1	DOM	3/11	60/211	1		1	BTB-00020638	2	1	REC	0/14	4/267	1
1	BTB-00020648	43810175	1	0.1071	0.155	2	0.7864	0.6543		1	BTB-00020648	1	2	DOM	3/11	80/191	0.7638		1	BTB-00020648	1	2	REC	0/14	4/267	1
1	BTA-89719-no-rs	43831502	2	0.4286	0.3782	1	0.6904	1.233		1	BTA-89719-no-rs	2	1	DOM	9/5	166/105	1		1	BTA-89719-no-rs	2	1	REC	3/11	39/232	0.442
1	BovineHD0100012401	43874971	2	0.4643	0.4485	1	1	1.066		1	BovineHD0100012401	2	1	DOM	10/4	181/81	1		1	BovineHD0100012401	2	1	REC	3/11	54/208	1
1	BovineHD0100012402	43881377	1	0.2857	0.3288	2	0.8363	0.8166		1	BovineHD0100012402	1	2	DOM	7/7	145/112	0.7835		1	BovineHD0100012402	1	2	REC	1/13	24/233	1
1	BovineHD0100012406	43897459	2	0.1071	0.2302	1	0.164	0.4013		1	BovineHD0100012406	2	1	DOM	3/11	109/156	0.1709		1	BovineHD0100012406	2	1	REC	0/14	13/252	1
1	ARS-BFGL-NGS-19097	43901606	2	0.3929	0.3708	1	0.8425	1.098		1	ARS-BFGL-NGS-19097	2	1	DOM	9/5	167/104	1		1	ARS-BFGL-NGS-19097	2	1	REC	2/12	34/237	0.6926
1	ARS-BFGL-NGS-106743	43925940	2	0.3571	0.2657	1	0.2821	1.535		1	ARS-BFGL-NGS-106743	2	1	DOM	9/5	119/152	0.171		1	ARS-BFGL-NGS-106743	2	1	REC	1/13	25/246	1
1	BovineHD0100012410	43926615	1	0.3571	0.4446	2	0.437	0.6939		1	BovineHD0100012410	1	2	DOM	9/5	184/87	0.7748		1	BovineHD0100012410	1	2	REC	1/13	57/214	0.3142
1	BovineHD0100012427	43970492	2	0.1429	0.2575	1	0.2622	0.4805		1	BovineHD0100012427	2	1	DOM	4/10	115/151	0.407		1	BovineHD0100012427	2	1	REC	0/14	22/244	0.6115
1	BovineHD0100012450	44010211	2	0.4286	0.3925	1	0.6966	1.161		1	BovineHD0100012450	2	1	DOM	9/5	164/101	1		1	BovineHD0100012450	2	1	REC	3/11	44/221	0.7118
1	ARS-BFGL-NGS-96886	44050867	2	0.2857	0.1926	1	0.227	1.677		1	ARS-BFGL-NGS-96886	2	1	DOM	8/6	91/179	0.08742		1	ARS-BFGL-NGS-96886	2	1	REC	0/14	13/257	1
1	Hapmap49368-BTA-89726	44091302	1	0.1429	0.1944	2	0.6275	0.6905		1	Hapmap49368-BTA-89726	1	2	DOM	4/10	94/176	0.7773		1	Hapmap49368-BTA-89726	1	2	REC	0/14	11/259	1
1	ARS-BFGL-NGS-116079	44217537	2	0.2857	0.2509	1	0.6594	1.194		1	ARS-BFGL-NGS-116079	2	1	DOM	8/6	117/154	0.4089		1	ARS-BFGL-NGS-116079	2	1	REC	0/14	19/252	0.6091
1	BovineHD0100012506	44229618	2	0.3929	0.4421	1	0.6978	0.8166		1	BovineHD0100012506	2	1	DOM	9/5	176/83	0.7743		1	BovineHD0100012506	2	1	REC	2/12	53/206	0.7425
1	ARS-BFGL-NGS-118317	44288613	2	0.5	0.3911	1	0.3218	1.557		1	ARS-BFGL-NGS-118317	2	1	DOM	11/3	174/97	0.3919		1	ARS-BFGL-NGS-118317	2	1	REC	3/11	38/233	0.4334
1	BovineHD0100012535	44326918	1	0.3214	0.3444	2	1	0.9019		1	BovineHD0100012535	1	2	DOM	9/5	145/112	0.7829		1	BovineHD0100012535	1	2	REC	0/14	32/225	0.385
1	BovineHD0100012544	44359646	2	0.3214	0.3817	1	0.5568	0.7674		1	BovineHD0100012544	2	1	DOM	9/5	159/103	1		1	BovineHD0100012544	2	1	REC	0/14	41/221	0.2365
1	Hapmap43396-BTA-89742	44375152	1	0	0.0369	2	0.6158	0		1	Hapmap43396-BTA-89742	1	2	DOM	0/14	20/251	0.6087		1	Hapmap43396-BTA-89742	1	2	REC	0/14	0/271	1
1	BovineHD0100012553	44389663	2	0.07143	0.1811	1	0.2005	0.3478		1	BovineHD0100012553	2	1	DOM	2/12	86/179	0.2379		1	BovineHD0100012553	2	1	REC	0/14	10/255	1
1	BovineHD0100012560	44422846	2	0.5357	0.4963	1	0.7032	1.171		1	BovineHD0100012560	2	1	DOM	14/0	201/70	0.02502		1	BovineHD0100012560	2	1	REC	1/13	68/203	0.1997
1	ARS-BFGL-NGS-57355	44475537	1	0	0.06273	2	0.4005	0		1	ARS-BFGL-NGS-57355	1	2	DOM	0/14	31/240	0.377		1	ARS-BFGL-NGS-57355	1	2	REC	0/14	3/268	1
1	BTB-00021247	44499948	1	0	0.02052	2	1	0		1	BTB-00021247	1	2	DOM	0/14	11/257	1		1	BTB-00021247	1	2	REC	0/14	0/268	1
1	BovineHD0100012597	44555369	2	0.03846	0.06844	1	1	0.5444		1	BovineHD0100012597	2	1	DOM	1/12	35/228	1		1	BovineHD0100012597	2	1	REC	0/13	1/262	1
1	BTB-01788892	44802416	1	0.25	0.1642	2	0.2957	1.697		1	BTB-01788892	1	2	DOM	7/7	81/190	0.1386		1	BTB-01788892	1	2	REC	0/14	8/263	1
1	BovineHD0100046983	44983356	1	0.07692	0.08209	2	1	0.9318		1	BovineHD0100046983	1	2	DOM	2/11	43/225	1		1	BovineHD0100046983	1	2	REC	0/13	1/267	1
1	BovineHD0100012940	45007205	1	0.3571	0.4151	2	0.6943	0.7828		1	BovineHD0100012940	1	2	DOM	10/4	176/89	0.7801		1	BovineHD0100012940	1	2	REC	0/14	44/221	0.1366
1	ARS-BFGL-NGS-75951	45042284	2	0	0.0572	1	0.3907	0		1	ARS-BFGL-NGS-75951	2	1	DOM	0/14	30/241	0.3753		1	ARS-BFGL-NGS-75951	2	1	REC	0/14	1/270	1
1	BovineHD0100012946	45042921	2	0.3077	0.3769	1	0.5392	0.7349		1	BovineHD0100012946	2	1	DOM	8/5	163/105	1		1	BovineHD0100012946	2	1	REC	0/13	39/229	0.2263
1	ARS-BFGL-NGS-31349	45090218	2	0.07143	0.09594	1	1	0.7249		1	ARS-BFGL-NGS-31349	2	1	DOM	2/12	50/221	1		1	ARS-BFGL-NGS-31349	2	1	REC	0/14	2/269	1
1	BovineHD0100012963	45105866	2	0.5385	0.39	1	0.152	1.825		1	BovineHD0100012963	2	1	DOM	11/2	158/101	0.1405		1	BovineHD0100012963	2	1	REC	3/10	44/215	0.4758
1	BovineHD0100012974	45146168	2	0.3571	0.2749	1	0.3876	1.465		1	BovineHD0100012974	2	1	DOM	10/4	131/140	0.1064		1	BovineHD0100012974	2	1	REC	0/14	18/253	1
1	BovineHD0100012982	45171571	2	0.3462	0.3638	1	1	0.9258		1	BovineHD0100012982	2	1	DOM	7/6	157/111	0.7784		1	BovineHD0100012982	2	1	REC	2/11	38/230	1
1	BTB-01462206	45182041	1	0	0.05166	2	0.3881	0		1	BTB-01462206	1	2	DOM	0/14	28/243	0.3747		1	BTB-01462206	1	2	REC	0/14	0/271	1
1	BTB-01462237	45213341	2	0.4643	0.441	1	0.8469	1.099		1	BTB-01462237	2	1	DOM	10/4	184/87	1		1	BTB-01462237	2	1	REC	3/11	55/216	1
1	BovineHD0100012997	45224996	2	0.5714	0.4792	1	0.4383	1.449		1	BovineHD0100012997	2	1	DOM	12/2	195/70	0.5306		1	BovineHD0100012997	2	1	REC	4/10	59/206	0.5267
1	ARS-BFGL-NGS-68706	45236542	1	0.3929	0.4556	2	0.5639	0.7733		1	ARS-BFGL-NGS-68706	1	2	DOM	11/3	188/82	0.565		1	ARS-BFGL-NGS-68706	1	2	REC	0/14	58/212	0.08127
1	ARS-BFGL-NGS-113748	45259100	1	0.2143	0.3727	2	0.108	0.459		1	ARS-BFGL-NGS-113748	1	2	DOM	5/9	164/107	0.09249		1	ARS-BFGL-NGS-113748	1	2	REC	1/13	38/233	0.7009
1	Hapmap38803-BTA-104250	45281490	1	0.03571	0.1199	2	0.2341	0.2718		1	Hapmap38803-BTA-104250	1	2	DOM	1/13	61/210	0.3161		1	Hapmap38803-BTA-104250	1	2	REC	0/14	4/267	1
1	ARS-BFGL-NGS-119382	45324731	1	0.4643	0.3782	2	0.4259	1.425		1	ARS-BFGL-NGS-119382	1	2	DOM	10/4	159/112	0.4131		1	ARS-BFGL-NGS-119382	1	2	REC	3/11	46/225	0.7149
1	BTB-00478386	45350130	1	0.4286	0.3185	2	0.222	1.605		1	BTB-00478386	1	2	DOM	11/3	138/132	0.05548		1	BTB-00478386	1	2	REC	1/13	34/236	1
1	BTB-00478374	45379246	1	0.1786	0.3204	2	0.1442	0.4612		1	BTB-00478374	1	2	DOM	5/9	142/128	0.2765		1	BTB-00478374	1	2	REC	0/14	31/239	0.3772
1	BovineHD0100013052	45386077	1	0.4286	0.3941	2	0.6978	1.153		1	BovineHD0100013052	1	2	DOM	11/3	166/103	0.2641		1	BovineHD0100013052	1	2	REC	1/13	46/223	0.4781
1	ARS-BFGL-NGS-10512	45458660	2	0.5357	0.4779	1	0.5671	1.261		1	ARS-BFGL-NGS-10512	2	1	DOM	13/1	193/78	0.1222		1	ARS-BFGL-NGS-10512	2	1	REC	2/12	66/205	0.5303
1	BovineHD0100013081	45476204	1	0.3077	0.3769	2	0.539	0.7348		1	BovineHD0100013081	1	2	DOM	8/5	160/104	1		1	BovineHD0100013081	1	2	REC	0/13	39/225	0.226
1	BovineHD0100013084	45484321	2	0.1786	0.1468	1	0.5898	1.263		1	BovineHD0100013084	2	1	DOM	5/9	70/199	0.5338		1	BovineHD0100013084	2	1	REC	0/14	9/260	1
1	BTA-90373-no-rs	45519346	1	0.2857	0.2214	2	0.4849	1.407		1	BTA-90373-no-rs	1	2	DOM	8/6	105/166	0.2615		1	BTA-90373-no-rs	1	2	REC	0/14	15/256	1
1	BovineHD0100013097	45544351	1	0.03846	0.2548	2	0.008996	0.117		1	BovineHD0100013097	1	2	DOM	1/12	115/148	0.009262		1	BovineHD0100013097	1	2	REC	0/13	19/244	0.6096
1	ARS-BFGL-NGS-34687	45555607	2	0.5	0.4207	1	0.4372	1.377		1	ARS-BFGL-NGS-34687	2	1	DOM	11/3	176/95	0.3934		1	ARS-BFGL-NGS-34687	2	1	REC	3/11	52/219	0.7377
1	BovineHD0100013102	45563997	2	0.3846	0.4356	1	0.688	0.8098		1	BovineHD0100013102	2	1	DOM	10/3	174/90	0.5534		1	BovineHD0100013102	2	1	REC	0/13	56/208	0.07752
1	BTB-01461996	45612781	2	0.5714	0.4539	1	0.2473	1.604		1	BTB-01461996	2	1	DOM	13/1	190/81	0.07492		1	BTB-01461996	2	1	REC	3/11	56/215	1
1	BTA-10863-rs29016414	45773590	2	0.03571	0.04059	1	1	0.8754		1	BTA-10863-rs29016414	2	1	DOM	1/13	22/249	1		1	BTA-10863-rs29016414	2	1	REC	0/14	0/271	1
1	BTA-95262-no-rs	45793675	2	0.1786	0.1181	1	0.3669	1.624		1	BTA-95262-no-rs	2	1	DOM	5/9	58/213	0.2015		1	BTA-95262-no-rs	2	1	REC	0/14	6/265	1
1	BTB-01786029	45848413	2	0.3214	0.2435	1	0.3706	1.471		1	BTB-01786029	2	1	DOM	9/5	112/159	0.1028		1	BTB-01786029	2	1	REC	0/14	20/251	0.6087
1	BTA-14361-rs29023125	45897874	1	0.03571	0.04059	2	1	0.8754		1	BTA-14361-rs29023125	1	2	DOM	1/13	22/249	1		1	BTA-14361-rs29023125	1	2	REC	0/14	0/271	1
1	ARS-BFGL-NGS-114234	45929427	1	0.2857	0.2019	2	0.3353	1.582		1	ARS-BFGL-NGS-114234	1	2	DOM	8/6	94/176	0.15		1	ARS-BFGL-NGS-114234	1	2	REC	0/14	15/255	1
1	BTA-89820-no-rs	45967602	2	0.3929	0.452	1	0.566	0.7844		1	BTA-89820-no-rs	2	1	DOM	10/4	184/87	1		1	BTA-89820-no-rs	2	1	REC	1/13	61/210	0.3161
1	Hapmap60140-ss46526251	46016435	2	0.2857	0.2056	1	0.3398	1.546		1	Hapmap60140-ss46526251	2	1	DOM	8/6	96/174	0.1523		1	Hapmap60140-ss46526251	2	1	REC	0/14	15/255	1
1	BovineHD0100013189	46035686	1	0.3077	0.2034	2	0.2165	1.74		1	BovineHD0100013189	1	2	DOM	8/5	92/171	0.07387		1	BovineHD0100013189	1	2	REC	0/13	15/248	1
1	UA-IFASA-4106	46048751	2	0.3929	0.4576	1	0.5629	0.7671		1	UA-IFASA-4106	2	1	DOM	10/4	187/84	1		1	UA-IFASA-4106	2	1	REC	1/13	61/210	0.3161
1	BovineHD0100013198	46078837	2	0.2857	0.2056	1	0.3398	1.546		1	BovineHD0100013198	2	1	DOM	8/6	95/175	0.1509		1	BovineHD0100013198	2	1	REC	0/14	16/254	1
1	BTB-00468553	46082337	2	0.03571	0.04059	1	1	0.8754		1	BTB-00468553	2	1	DOM	1/13	22/249	1		1	BTB-00468553	2	1	REC	0/14	0/271	1
1	BovineHD0100013203	46103884	1	0	0.06506	2	0.3956	0		1	BovineHD0100013203	1	2	DOM	0/13	35/234	0.3809		1	BovineHD0100013203	1	2	REC	0/13	0/269	1
1	BovineHD0100013207	46124747	2	0.4231	0.4349	1	1	0.9527		1	BovineHD0100013207	2	1	DOM	10/3	181/88	0.5585		1	BovineHD0100013207	2	1	REC	1/12	53/216	0.4737
1	BTB-00468519	46202802	2	0.1429	0.1734	1	0.8023	0.7943		1	BTB-00468519	2	1	DOM	4/10	85/186	1		1	BTB-00468519	2	1	REC	0/14	9/262	1
1	ARS-BFGL-NGS-110320	46242001	1	0.3214	0.3574	2	0.8402	0.8516		1	ARS-BFGL-NGS-110320	1	2	DOM	9/5	158/112	0.7848		1	ARS-BFGL-NGS-110320	1	2	REC	0/14	35/235	0.23
1	ARS-BFGL-NGS-67684	46267521	2	0.3214	0.2823	1	0.6695	1.204		1	ARS-BFGL-NGS-67684	2	1	DOM	9/5	128/143	0.2757		1	ARS-BFGL-NGS-67684	2	1	REC	0/14	25/246	0.6204
1	BTB-00468485	46294957	2	0.1429	0.1218	1	0.7659	1.202		1	BTB-00468485	2	1	DOM	4/10	60/211	0.5247		1	BTB-00468485	2	1	REC	0/14	6/265	1
1	BTB-00468476	46322462	1	0.2857	0.3376	2	0.6834	0.7847		1	BTB-00468476	1	2	DOM	6/8	152/119	0.4118		1	BTB-00468476	1	2	REC	2/12	31/240	0.6695
1	BTB-01608930	46425212	1	0.3214	0.3875	2	0.5541	0.7489		1	BTB-01608930	1	2	DOM	6/8	169/102	0.1654		1	BTB-01608930	1	2	REC	3/11	41/230	0.4601
1	BovineHD0100013284	46452563	1	0.4231	0.4721	2	0.6904	0.8199		1	BovineHD0100013284	1	2	DOM	9/4	190/79	1		1	BovineHD0100013284	1	2	REC	2/11	64/205	0.7391
1	BovineHD0100013290	46480170	2	0.2692	0.3309	1	0.6696	0.7451		1	BovineHD0100013290	2	1	DOM	5/8	149/120	0.2641		1	BovineHD0100013290	2	1	REC	2/11	29/240	0.6418
1	BTA-109011-no-rs	46575158	2	0.2857	0.2196	1	0.4835	1.422		1	BTA-109011-no-rs	2	1	DOM	8/6	102/169	0.1654		1	BTA-109011-no-rs	2	1	REC	0/14	17/254	1
1	Hapmap39710-BTA-108633	46659142	1	0.4286	0.3727	2	0.5541	1.262		1	Hapmap39710-BTA-108633	1	2	DOM	10/4	164/107	0.5765		1	Hapmap39710-BTA-108633	1	2	REC	2/12	38/233	1
1	Hapmap54262-rs29018839	46735327	2	0.2692	0.3829	1	0.3027	0.5938		1	Hapmap54262-rs29018839	2	1	DOM	7/6	169/100	0.5641		1	Hapmap54262-rs29018839	2	1	REC	0/13	37/232	0.229
1	ARS-BFGL-NGS-41577	46756027	1	0.07143	0.05904	2	0.68	1.226		1	ARS-BFGL-NGS-41577	1	2	DOM	2/12	29/242	0.655		1	ARS-BFGL-NGS-41577	1	2	REC	0/14	3/268	1
1	BovineHD0100013379	46834727	2	0.07692	0.2193	1	0.09022	0.2966		1	BovineHD0100013379	2	1	DOM	2/11	105/164	0.1408		1	BovineHD0100013379	2	1	REC	0/13	13/256	1
1	ARS-BFGL-NGS-23106	46884964	2	0.07143	0.02399	1	0.1647	3.13		1	ARS-BFGL-NGS-23106	2	1	DOM	2/12	12/259	0.1454		1	ARS-BFGL-NGS-23106	2	1	REC	0/14	1/270	1
1	BovineHD0100013407	46922216	1	0.5	0.4796	2	0.844	1.085		1	BovineHD0100013407	1	2	DOM	12/1	191/78	0.1199		1	BovineHD0100013407	1	2	REC	1/12	67/202	0.2001
1	BTA-99040-no-rs	46953687	2	0	0.02583	1	1	0		1	BTA-99040-no-rs	2	1	DOM	0/14	14/257	1		1	BTA-99040-no-rs	2	1	REC	0/14	0/271	1
1	BovineHD0100013416	46963727	1	0.3846	0.3144	2	0.518	1.363		1	BovineHD0100013416	1	2	DOM	9/4	136/128	0.2624		1	BovineHD0100013416	1	2	REC	1/12	30/234	1
1	ARS-BFGL-BAC-24524	47022790	2	0.3571	0.2675	1	0.2851	1.521		1	ARS-BFGL-BAC-24524	2	1	DOM	9/5	122/149	0.1786		1	ARS-BFGL-BAC-24524	2	1	REC	1/13	23/248	1
1	Hapmap55429-rs29012753	47050759	2	0.25	0.2934	1	0.8312	0.8029		1	Hapmap55429-rs29012753	2	1	DOM	6/8	133/138	0.7861		1	Hapmap55429-rs29012753	2	1	REC	1/13	26/245	1
1	BTB-02090792	47079462	2	0.3571	0.3007	1	0.5314	1.292		1	BTB-02090792	2	1	DOM	9/5	136/135	0.4131		1	BTB-02090792	2	1	REC	1/13	27/244	1
1	BTB-01702372	47112713	2	0.1071	0.06273	1	0.4161	1.793		1	BTB-01702372	2	1	DOM	3/11	31/240	0.2256		1	BTB-01702372	2	1	REC	0/14	3/268	1
1	BTB-01572184	47157644	1	0.1786	0.1993	2	1	0.8736		1	BTB-01572184	1	2	DOM	5/9	96/175	1		1	BTB-01572184	1	2	REC	0/14	12/259	1
1	Hapmap43751-BTA-104783	47185588	2	0.03571	0.1052	1	0.3441	0.3151		1	Hapmap43751-BTA-104783	2	1	DOM	1/13	55/216	0.3166		1	Hapmap43751-BTA-104783	2	1	REC	0/14	2/269	1
1	BovineHD0100013469	47216446	2	0.03571	0.1648	1	0.1053	0.1877		1	BovineHD0100013469	2	1	DOM	1/13	85/185	0.07141		1	BovineHD0100013469	2	1	REC	0/14	4/266	1
1	BTB-01967977	47302352	2	0.1429	0.2232	1	0.4812	0.5799		1	BTB-01967977	2	1	DOM	4/10	110/161	0.4178		1	BTB-01967977	2	1	REC	0/14	11/260	1
1	BTB-01663516	47334486	2	0.1071	0.1074	1	1	0.9972		1	BTB-01663516	2	1	DOM	3/11	54/216	1		1	BTB-01663516	2	1	REC	0/14	4/266	1
1	BovineHD0100013497	47357605	1	0.3571	0.3759	2	1	0.9223		1	BovineHD0100013497	1	2	DOM	8/6	161/109	1		1	BovineHD0100013497	1	2	REC	2/12	42/228	1
1	Hapmap42068-BTA-111564	47378821	1	0.25	0.1863	2	0.456	1.455		1	Hapmap42068-BTA-111564	1	2	DOM	6/8	93/178	0.5691		1	Hapmap42068-BTA-111564	1	2	REC	1/13	8/263	0.3687
1	BTB-01202368	47421211	1	0.3214	0.2841	2	0.671	1.193		1	BTB-01202368	1	2	DOM	9/5	132/139	0.2854		1	BTB-01202368	1	2	REC	0/14	22/249	0.6108
1	BTB-01202377	47439819	2	0.3214	0.3672	1	0.6915	0.8165		1	BTB-01202377	2	1	DOM	8/6	161/110	1		1	BTB-01202377	2	1	REC	1/13	38/233	0.7009
1	BTA-122400-no-rs	47465147	2	0.3929	0.4889	1	0.3398	0.6764		1	BTA-122400-no-rs	2	1	DOM	10/4	198/73	1		1	BTA-122400-no-rs	2	1	REC	1/13	67/204	0.1997
1	Hapmap60003-rs29024905	47489244	2	0.3214	0.2934	1	0.8319	1.141		1	Hapmap60003-rs29024905	2	1	DOM	7/7	134/137	1		1	Hapmap60003-rs29024905	2	1	REC	2/12	25/246	0.63
1	BTB-01202460	47578457	2	0.3214	0.2694	1	0.5205	1.285		1	BTB-01202460	2	1	DOM	9/5	123/148	0.1818		1	BTB-01202460	2	1	REC	0/14	23/248	0.6132
1	BovineHD0100013544	47593505	2	0.07143	0.1296	1	0.5606	0.5165		1	BovineHD0100013544	2	1	DOM	2/12	66/204	0.53		1	BovineHD0100013544	2	1	REC	0/14	4/266	1
1	Hapmap27230-BTA-162491	47606699	2	0.4643	0.4871	1	0.8485	0.9126		1	Hapmap27230-BTA-162491	2	1	DOM	10/4	202/69	0.7594		1	Hapmap27230-BTA-162491	2	1	REC	3/11	62/209	1
1	ARS-BFGL-NGS-105365	47660239	1	0.03571	0.07011	2	0.7123	0.4912		1	ARS-BFGL-NGS-105365	1	2	DOM	1/13	37/234	0.7017		1	ARS-BFGL-NGS-105365	1	2	REC	0/14	1/270	1
1	ARS-BFGL-NGS-73983	47740633	2	0.5357	0.4705	1	0.5629	1.299		1	ARS-BFGL-NGS-73983	2	1	DOM	12/2	187/84	0.2413		1	ARS-BFGL-NGS-73983	2	1	REC	3/11	68/203	1
1	ARS-BFGL-BAC-16973	47765383	2	0.3571	0.393	1	0.8432	0.8581		1	ARS-BFGL-BAC-16973	2	1	DOM	9/5	171/100	1		1	ARS-BFGL-BAC-16973	2	1	REC	1/13	42/229	0.702
1	Hapmap49948-BTA-29490	47815773	1	0.07143	0.1181	2	0.76	0.5745		1	Hapmap49948-BTA-29490	1	2	DOM	2/12	60/211	0.7414		1	Hapmap49948-BTA-29490	1	2	REC	0/14	4/267	1
1	ARS-BFGL-NGS-50906	47982861	1	0.3929	0.3229	2	0.5354	1.357		1	ARS-BFGL-NGS-50906	1	2	DOM	10/4	144/127	0.2716		1	ARS-BFGL-NGS-50906	1	2	REC	1/13	31/240	1
1	BovineHD0100013667	48012415	1	0.03846	0.05283	2	1	0.7171		1	BovineHD0100013667	1	2	DOM	1/12	28/237	1		1	BovineHD0100013667	1	2	REC	0/13	0/265	1
1	Hapmap59092-rs29024583	48061029	2	0.1429	0.1808	1	0.8016	0.7551		1	Hapmap59092-rs29024583	2	1	DOM	4/10	89/182	1		1	Hapmap59092-rs29024583	2	1	REC	0/14	9/262	1
1	BovineHD0100013692	48117247	1	0.1429	0.1513	2	1	0.935		1	BovineHD0100013692	1	2	DOM	4/10	76/195	1		1	BovineHD0100013692	1	2	REC	0/14	6/265	1
1	ARS-BFGL-NGS-41264	48157004	2	0.07143	0.03321	1	0.2571	2.239		1	ARS-BFGL-NGS-41264	2	1	DOM	2/12	18/253	0.2565		1	ARS-BFGL-NGS-41264	2	1	REC	0/14	0/271	1
1	Hapmap38806-BTA-110152	48263748	2	0.07143	0.1074	1	0.7569	0.6393		1	Hapmap38806-BTA-110152	2	1	DOM	2/12	56/214	0.7421		1	Hapmap38806-BTA-110152	2	1	REC	0/14	2/268	1
1	BovineHD0100013736	48268016	2	0.1071	0.1222	1	1	0.8618		1	BovineHD0100013736	2	1	DOM	3/11	63/207	1		1	BovineHD0100013736	2	1	REC	0/14	3/267	1
1	BTB-01146938	48360337	1	0.3571	0.3444	2	1	1.057		1	BTB-01146938	1	2	DOM	8/6	150/120	1		1	BTB-01146938	1	2	REC	2/12	36/234	1
1	BovineHD0100013762	48425332	2	0.07692	0.1623	1	0.406	0.4302		1	BovineHD0100013762	2	1	DOM	2/11	77/188	0.3619		1	BovineHD0100013762	2	1	REC	0/13	9/256	1
1	BTB-01146838	48436492	1	0.3214	0.369	2	0.6909	0.81		1	BTB-01146838	1	2	DOM	9/5	165/106	1		1	BTB-01146838	1	2	REC	0/14	35/236	0.2303
1	Hapmap50572-BTA-113037	48500613	1	0.5357	0.4317	2	0.33	1.519		1	Hapmap50572-BTA-113037	1	2	DOM	12/2	176/95	0.1501		1	Hapmap50572-BTA-113037	1	2	REC	3/11	58/213	1
1	ARS-BFGL-NGS-83459	48538897	2	0.07143	0.1328	1	0.5622	0.5021		1	ARS-BFGL-NGS-83459	2	1	DOM	2/12	67/204	0.5295		1	ARS-BFGL-NGS-83459	2	1	REC	0/14	5/266	1
1	BovineHD0100013844	48713582	1	0.3214	0.4204	2	0.3319	0.6531		1	BovineHD0100013844	1	2	DOM	8/6	173/97	0.5825		1	BovineHD0100013844	1	2	REC	1/13	54/216	0.3182
1	BovineHD0100013846	48715780	1	0.3214	0.4204	2	0.3319	0.6531		1	BovineHD0100013846	1	2	DOM	8/6	173/97	0.5825		1	BovineHD0100013846	1	2	REC	1/13	54/216	0.3182
1	BovineHD0100013848	48724388	2	0.3214	0.4264	1	0.3286	0.6372		1	BovineHD0100013848	2	1	DOM	8/6	172/93	0.5748		1	BovineHD0100013848	2	1	REC	1/13	54/211	0.316
1	BovineHD0100013866	48752114	1	0.5357	0.3947	2	0.1666	1.769		1	BovineHD0100013866	1	2	DOM	12/2	162/104	0.0882		1	BovineHD0100013866	1	2	REC	3/11	48/218	0.7249
1	BovineHD0100013867	48755603	2	0.2143	0.1283	1	0.2452	1.853		1	BovineHD0100013867	2	1	DOM	5/9	61/204	0.331		1	BovineHD0100013867	2	1	REC	1/13	7/258	0.3411
1	BTA-113021-no-rs	48823158	1	0.4643	0.4667	2	1	0.9905		1	BTA-113021-no-rs	1	2	DOM	10/4	192/78	1		1	BTA-113021-no-rs	1	2	REC	3/11	60/210	1
1	BovineHD0100013906	48843312	1	0.2308	0.2224	2	1	1.049		1	BovineHD0100013906	1	2	DOM	5/8	98/165	1		1	BovineHD0100013906	1	2	REC	1/12	19/244	1
1	BTB-01077379	48869448	2	0.4286	0.4244	1	1	1.017		1	BTB-01077379	2	1	DOM	10/4	178/93	0.7782		1	BTB-01077379	2	1	REC	2/12	52/219	1
1	BovineHD0100013920	48904277	1	0.3571	0.4436	2	0.4371	0.6968		1	BovineHD0100013920	1	2	DOM	9/5	180/86	0.776		1	BovineHD0100013920	1	2	REC	1/13	56/210	0.314
1	BTB-01077277	48906977	2	0.3571	0.437	1	0.4407	0.7156		1	BTB-01077277	2	1	DOM	9/5	180/90	1		1	BTB-01077277	2	1	REC	1/13	56/214	0.3149
1	Hapmap57446-rs29023998	48981871	2	0	0.03148	1	1	0		1	Hapmap57446-rs29023998	2	1	DOM	0/14	17/253	1		1	Hapmap57446-rs29023998	2	1	REC	0/14	0/270	1
1	BovineHD0100013943	49011657	2	0.3571	0.5	1	0.1751	0.5556		1	BovineHD0100013943	2	1	DOM	9/5	195/73	0.5421		1	BovineHD0100013943	2	1	REC	1/13	73/195	0.1236
1	BTB-01615915	49314301	1	0.2143	0.2657	2	0.6631	0.7538		1	BTB-01615915	1	2	DOM	6/8	123/148	1		1	BTB-01615915	1	2	REC	0/14	21/250	0.6093
1	BovineHD0100014023	49415050	1	0.3929	0.4347	2	0.7005	0.8415		1	BovineHD0100014023	1	2	DOM	10/4	185/83	1		1	BovineHD0100014023	1	2	REC	1/13	48/220	0.4764
1	BovineHD0100014048	49515972	2	0.1786	0.2857	1	0.2824	0.5435		1	BovineHD0100014048	2	1	DOM	4/10	129/137	0.1763		1	BovineHD0100014048	2	1	REC	1/13	23/243	1
1	BovineHD0100014053	49537293	2	0.1786	0.1491	1	0.5945	1.241		1	BovineHD0100014053	2	1	DOM	5/9	71/194	0.5386		1	BovineHD0100014053	2	1	REC	0/14	8/257	1
1	BovineHD0100014063	49597814	2	0.1786	0.2519	1	0.5027	0.6457		1	BovineHD0100014063	2	1	DOM	4/10	118/150	0.2846		1	BovineHD0100014063	2	1	REC	1/13	17/251	1
1	BovineHD0100014071	49634079	2	0.1429	0.1748	1	0.802	0.7867		1	BovineHD0100014071	2	1	DOM	4/10	84/182	1		1	BovineHD0100014071	2	1	REC	0/14	9/257	1
1	BTB-00132601	49688088	1	0.1429	0.1926	2	0.628	0.6987		1	BTB-00132601	1	2	DOM	4/10	94/176	0.7773		1	BTB-00132601	1	2	REC	0/14	10/260	1
1	BovineHD0100014103	49728052	1	0.03571	0.1623	2	0.1037	0.1912		1	BovineHD0100014103	1	2	DOM	1/13	80/185	0.07384		1	BovineHD0100014103	1	2	REC	0/14	6/259	1
1	ARS-BFGL-NGS-38261	49729236	2	0.3571	0.3537	1	1	1.015		1	ARS-BFGL-NGS-38261	2	1	DOM	9/5	159/111	0.7856		1	ARS-BFGL-NGS-38261	2	1	REC	1/13	32/238	1
1	ARS-BFGL-BAC-15402	49762136	1	0.2857	0.19	2	0.2222	1.705		1	ARS-BFGL-BAC-15402	1	2	DOM	8/6	94/177	0.1497		1	ARS-BFGL-BAC-15402	1	2	REC	0/14	9/262	1
1	BTB-00132817	49799340	1	0.3571	0.3537	2	1	1.015		1	BTB-00132817	1	2	DOM	9/5	159/111	0.7856		1	BTB-00132817	1	2	REC	1/13	32/238	1
1	BTB-01699628	49829799	2	0.03571	0.163	1	0.1042	0.1902		1	BTB-01699628	2	1	DOM	1/13	82/188	0.07338		1	BTB-01699628	2	1	REC	0/14	6/264	1
1	BTA-114651-no-rs	49851536	2	0.3571	0.417	1	0.5625	0.7768		1	BTA-114651-no-rs	2	1	DOM	9/5	181/90	1		1	BTA-114651-no-rs	2	1	REC	1/13	45/226	0.7069
1	Hapmap41715-BTA-100026	49919784	2	0.03571	0.1511	1	0.1034	0.208		1	Hapmap41715-BTA-100026	2	1	DOM	1/13	77/191	0.1221		1	Hapmap41715-BTA-100026	2	1	REC	0/14	4/264	1
1	BTB-00022097	50009545	2	0.2143	0.1771	1	0.6139	1.267		1	BTB-00022097	2	1	DOM	6/8	89/182	0.5617		1	BTB-00022097	2	1	REC	0/14	7/264	1
1	BTB-01165120	50064432	1	0.1786	0.1241	2	0.3823	1.535		1	BTB-01165120	1	2	DOM	5/9	64/202	0.344		1	BTB-01165120	1	2	REC	0/14	2/264	1
1	Hapmap49829-BTA-101896	50173554	2	0.3571	0.3463	1	1	1.049		1	Hapmap49829-BTA-101896	2	1	DOM	10/4	154/116	0.4074		1	Hapmap49829-BTA-101896	2	1	REC	0/14	33/237	0.3834
1	BovineHD0100014237	50241095	2	0	0.08083	1	0.1554	0		1	BovineHD0100014237	2	1	DOM	0/14	42/224	0.1392		1	BovineHD0100014237	2	1	REC	0/14	1/265	1
1	BTB-01164952	50252416	1	0	0.06111	2	0.3969	0		1	BTB-01164952	1	2	DOM	0/14	33/237	0.3834		1	BTB-01164952	1	2	REC	0/14	0/270	1
1	BTB-01164946	50279694	2	0.5714	0.4704	1	0.3352	1.501		1	BTB-01164946	2	1	DOM	12/2	191/79	0.363		1	BTB-01164946	2	1	REC	4/10	63/207	0.7466
1	BTB-01164879	50375545	2	0.1071	0.09815	1	0.7495	1.103		1	BTB-01164879	2	1	DOM	3/11	49/221	0.726		1	BTB-01164879	2	1	REC	0/14	4/266	1
1	BTB-00022352	50415732	1	0.1429	0.1074	2	0.5326	1.385		1	BTB-00022352	1	2	DOM	4/10	53/217	0.4907		1	BTB-00022352	1	2	REC	0/14	5/265	1
1	BovineHD0100014288	50443160	1	0.3929	0.4111	2	1	0.9269		1	BovineHD0100014288	1	2	DOM	9/5	171/99	1		1	BovineHD0100014288	1	2	REC	2/12	51/219	1
1	BTB-00022376	50457230	1	0.07143	0.07963	2	1	0.8891		1	BTB-00022376	1	2	DOM	2/12	41/229	1		1	BTB-00022376	1	2	REC	0/14	2/268	1
1	Hapmap41716-BTA-100042	50484660	1	0.1429	0.2823	2	0.1303	0.4237		1	Hapmap41716-BTA-100042	1	2	DOM	4/10	132/139	0.1752		1	Hapmap41716-BTA-100042	1	2	REC	0/14	21/250	0.6093
1	BovineHD0100014306	50493683	2	0.1429	0.2906	1	0.1298	0.4069		1	BovineHD0100014306	2	1	DOM	4/10	133/132	0.1695		1	BovineHD0100014306	2	1	REC	0/14	21/244	0.6096
1	BovineHD0100014307	50494779	2	0.1429	0.2822	1	0.1301	0.4239		1	BovineHD0100014307	2	1	DOM	4/10	128/136	0.1763		1	BovineHD0100014307	2	1	REC	0/14	21/243	0.6097
1	ARS-BFGL-NGS-101533	50631100	2	0.4286	0.4	1	0.8439	1.125		1	ARS-BFGL-NGS-101533	2	1	DOM	10/4	165/105	0.5772		1	ARS-BFGL-NGS-101533	2	1	REC	2/12	51/219	1
1	BovineHD0100014362	50665945	2	0.4286	0.3667	1	0.5494	1.295		1	BovineHD0100014362	2	1	DOM	10/4	154/116	0.4074		1	BovineHD0100014362	2	1	REC	2/12	44/226	1
1	ARS-BFGL-NGS-6521	50767507	2	0	0.02778	1	1	0		1	ARS-BFGL-NGS-6521	2	1	DOM	0/14	15/255	1		1	ARS-BFGL-NGS-6521	2	1	REC	0/14	0/270	1
1	ARS-BFGL-NGS-14638	50809694	2	0	0.09142	1	0.1589	0		1	ARS-BFGL-NGS-14638	2	1	DOM	0/14	47/221	0.1368		1	ARS-BFGL-NGS-14638	2	1	REC	0/14	2/266	1
1	Hapmap42747-BTA-97910	50856429	2	0.3571	0.3303	1	0.8374	1.127		1	Hapmap42747-BTA-97910	2	1	DOM	9/5	151/120	0.5915		1	Hapmap42747-BTA-97910	2	1	REC	1/13	28/243	1
1	BTB-00184675	50886644	2	0.1429	0.2332	1	0.3579	0.548		1	BTB-00184675	2	1	DOM	4/10	112/156	0.4107		1	BTB-00184675	2	1	REC	0/14	13/255	1
1	ARS-BFGL-NGS-27696	50927543	2	0.07143	0.06852	1	1	1.046		1	ARS-BFGL-NGS-27696	2	1	DOM	2/12	36/234	1		1	ARS-BFGL-NGS-27696	2	1	REC	0/14	1/269	1
1	ARS-BFGL-NGS-15670	50974257	2	0.4286	0.4207	1	1	1.033		1	ARS-BFGL-NGS-15670	2	1	DOM	11/3	178/93	0.3965		1	ARS-BFGL-NGS-15670	2	1	REC	1/13	50/221	0.4769
1	BovineHD0100014436	50978540	1	0.2857	0.2593	2	0.8253	1.142		1	BovineHD0100014436	1	2	DOM	8/6	116/152	0.4092		1	BovineHD0100014436	1	2	REC	0/14	23/245	0.6139
1	BTB-01661970	51001448	2	0.3929	0.4241	1	0.8455	0.8788		1	BTB-01661970	2	1	DOM	10/4	181/89	1		1	BTB-01661970	2	1	REC	1/13	48/222	0.4765
1	BovineHD0100014490	51157870	1	0.4643	0.5	2	0.8467	0.8667		1	BovineHD0100014490	1	2	DOM	11/3	200/65	1		1	BovineHD0100014490	1	2	REC	2/12	65/200	0.5296
1	ARS-BFGL-NGS-80227	51199296	2	0.3929	0.4982	1	0.3341	0.6519		1	ARS-BFGL-NGS-80227	2	1	DOM	10/4	205/66	0.752		1	ARS-BFGL-NGS-80227	2	1	REC	1/13	65/206	0.201
1	BovineHD0100014505	51226374	1	0.2857	0.2387	2	0.6499	1.276		1	BovineHD0100014505	1	2	DOM	8/6	113/153	0.4072		1	BovineHD0100014505	1	2	REC	0/14	14/252	1
1	BTB-01303321	51253635	1	0.1071	0.1241	2	1	0.8472		1	BTB-01303321	1	2	DOM	3/11	64/206	1		1	BTB-01303321	1	2	REC	0/14	3/267	1
1	UA-IFASA-6260	51319043	2	0.1071	0.1698	1	0.6015	0.5868		1	UA-IFASA-6260	2	1	DOM	3/11	82/186	0.5638		1	UA-IFASA-6260	2	1	REC	0/14	9/259	1
1	Hapmap54644-rs29022483	51443154	1	0.3929	0.2944	2	0.2918	1.55		1	Hapmap54644-rs29022483	1	2	DOM	9/5	130/140	0.281		1	Hapmap54644-rs29022483	1	2	REC	2/12	29/241	0.6558
1	BTA-100081-no-rs	51501180	2	0.2857	0.2759	1	1	1.05		1	BTA-100081-no-rs	2	1	DOM	8/6	123/147	0.4231		1	BTA-100081-no-rs	2	1	REC	0/14	26/244	0.6253
1	BovineHD0100014595	51600068	2	0.03571	0.109	1	0.3442	0.3027		1	BovineHD0100014595	2	1	DOM	1/13	55/211	0.3149		1	BovineHD0100014595	2	1	REC	0/14	3/263	1
1	BTA-100076-no-rs	51629454	2	0.3214	0.286	1	0.6725	1.183		1	BTA-100076-no-rs	2	1	DOM	9/5	133/138	0.2886		1	BTA-100076-no-rs	2	1	REC	0/14	22/249	0.6108
1	ARS-BFGL-NGS-29536	51674103	1	0.25	0.3247	2	0.5345	0.6932		1	ARS-BFGL-NGS-29536	1	2	DOM	7/7	146/125	0.7907		1	ARS-BFGL-NGS-29536	1	2	REC	0/14	30/241	0.3753
1	ARS-BFGL-NGS-26781	51729431	2	0.07143	0.2037	1	0.09294	0.3007		1	ARS-BFGL-NGS-26781	2	1	DOM	2/12	99/171	0.1493		1	ARS-BFGL-NGS-26781	2	1	REC	0/14	11/259	1
1	BTA-27925-no-rs	51785197	1	0.25	0.25	2	1	1		1	BTA-27925-no-rs	1	2	DOM	7/7	116/152	0.7834		1	BTA-27925-no-rs	1	2	REC	0/14	18/250	0.6102
1	BovineHD0100014666	51793463	1	0.3214	0.3139	2	1	1.035		1	BovineHD0100014666	1	2	DOM	8/6	137/129	0.7871		1	BovineHD0100014666	1	2	REC	1/13	30/236	1
1	Hapmap23148-BTA-123974	51845190	2	0.07143	0.2611	1	0.02411	0.2177		1	Hapmap23148-BTA-123974	2	1	DOM	2/12	125/145	0.02502		1	Hapmap23148-BTA-123974	2	1	REC	0/14	16/254	1
1	BovineHD0100014707	51942049	1	0.3571	0.3528	2	1	1.019		1	BovineHD0100014707	1	2	DOM	10/4	156/109	0.414		1	BovineHD0100014707	1	2	REC	0/14	31/234	0.3784
1	BovineHD0100014714	51960243	2	0	0.07008	1	0.2458	0		1	BovineHD0100014714	2	1	DOM	0/13	36/228	0.2295		1	BovineHD0100014714	2	1	REC	0/13	1/263	1
1	UA-IFASA-5103	51980212	1	0.3571	0.3616	2	1	0.9807		1	UA-IFASA-5103	1	2	DOM	10/4	157/114	0.4097		1	UA-IFASA-5103	1	2	REC	0/14	39/232	0.2292
1	ARS-BFGL-NGS-105123	52001408	1	0.3571	0.2944	2	0.5258	1.331		1	ARS-BFGL-NGS-105123	1	2	DOM	9/5	135/135	0.4127		1	ARS-BFGL-NGS-105123	1	2	REC	1/13	24/246	1
1	Hapmap42392-BTA-100065	52121657	1	0.25	0.213	2	0.6388	1.232		1	Hapmap42392-BTA-100065	1	2	DOM	7/7	102/168	0.4044		1	Hapmap42392-BTA-100065	1	2	REC	0/14	13/257	1
1	ARS-BFGL-NGS-112553	52229363	2	0.1071	0.1333	1	1	0.78		1	ARS-BFGL-NGS-112553	2	1	DOM	3/11	68/202	1		1	ARS-BFGL-NGS-112553	2	1	REC	0/14	4/266	1
1	BTA-100060-no-rs	52260898	1	0.1071	0.2093	2	0.2356	0.4535		1	BTA-100060-no-rs	1	2	DOM	3/11	105/165	0.2621		1	BTA-100060-no-rs	1	2	REC	0/14	8/262	1
1	BTA-100058-no-rs	52304155	2	0.3571	0.413	1	0.6943	0.7897		1	BTA-100058-no-rs	2	1	DOM	9/5	181/89	0.7798		1	BTA-100058-no-rs	2	1	REC	1/13	42/228	0.7021
1	BovineHD0100014814	52357886	1	0.3214	0.3741	2	0.6898	0.7926		1	BovineHD0100014814	1	2	DOM	9/5	161/105	1		1	BovineHD0100014814	1	2	REC	0/14	38/228	0.2286
1	BovineHD0100014824	52376933	1	0.03571	0.1093	2	0.3445	0.3019		1	BovineHD0100014824	1	2	DOM	1/13	58/212	0.3139		1	BovineHD0100014824	1	2	REC	0/14	1/269	1
1	BTA-120739-no-rs	52386165	2	0.1786	0.2	1	1	0.8696		1	BTA-120739-no-rs	2	1	DOM	5/9	100/170	1		1	BTA-120739-no-rs	2	1	REC	0/14	8/262	1
1	BovineHD0100014833	52401002	2	0.4615	0.5	1	0.8413	0.8571		1	BovineHD0100014833	2	1	DOM	11/2	201/63	0.7391		1	BovineHD0100014833	2	1	REC	1/12	63/201	0.3105
1	ARS-BFGL-NGS-89588	52418784	2	0.1786	0.2417	1	0.6489	0.682		1	ARS-BFGL-NGS-89588	2	1	DOM	5/9	119/152	0.5937		1	ARS-BFGL-NGS-89588	2	1	REC	0/14	12/259	1
1	BTB-00026002	52459222	1	0.1429	0.2232	2	0.4812	0.5799		1	BTB-00026002	1	2	DOM	4/10	109/162	0.5767		1	BTB-00026002	1	2	REC	0/14	12/259	1
1	ARS-BFGL-NGS-76469	52536112	1	0.5	0.4704	2	0.8469	1.126		1	ARS-BFGL-NGS-76469	1	2	DOM	13/1	197/73	0.1243		1	ARS-BFGL-NGS-76469	1	2	REC	1/13	57/213	0.3141
1	BovineHD0100014899	52543921	2	0.3571	0.3736	1	1	0.9315		1	BovineHD0100014899	2	1	DOM	10/4	161/104	0.5765		1	BovineHD0100014899	2	1	REC	0/14	37/228	0.228
1	BovineHD0100014918	52602161	1	0.5357	0.4179	2	0.2425	1.607		1	BovineHD0100014918	1	2	DOM	11/3	175/93	0.3946		1	BovineHD0100014918	1	2	REC	4/10	49/219	0.3078
1	Hapmap27147-BTA-124015	52668291	1	0.07143	0.2019	2	0.1383	0.3042		1	Hapmap27147-BTA-124015	1	2	DOM	2/12	100/170	0.09457		1	Hapmap27147-BTA-124015	1	2	REC	0/14	9/261	1
1	Hapmap24136-BTA-124014	52692977	2	0.5357	0.4815	1	0.6989	1.242		1	Hapmap24136-BTA-124014	2	1	DOM	12/2	200/71	0.5302		1	Hapmap24136-BTA-124014	2	1	REC	3/11	61/210	1
1	BovineHD0100014953	52773325	1	0.2857	0.3806	2	0.4238	0.651		1	BovineHD0100014953	1	2	DOM	8/6	170/98	0.7773		1	BovineHD0100014953	1	2	REC	0/14	34/234	0.3887
1	BovineHD0100014988	52848948	1	0.25	0.265	2	1	0.9243		1	BovineHD0100014988	1	2	DOM	7/7	126/140	1		1	BovineHD0100014988	1	2	REC	0/14	15/251	1
1	Hapmap47502-BTA-110302	52854500	2	0.1071	0.1494	1	0.7844	0.683		1	Hapmap47502-BTA-110302	2	1	DOM	3/11	75/196	0.7646		1	Hapmap47502-BTA-110302	2	1	REC	0/14	6/265	1
1	BovineHD0100014992	52855378	2	0.1071	0.1523	1	0.7851	0.6681		1	BovineHD0100014992	2	1	DOM	3/11	75/191	0.7638		1	BovineHD0100014992	2	1	REC	0/14	6/260	1
1	BovineHD0100015002	52889663	2	0.07143	0.09074	1	1	0.7708		1	BovineHD0100015002	2	1	DOM	1/13	48/222	0.4765		1	BovineHD0100015002	2	1	REC	1/13	1/269	0.09633
1	BTB-00025197	52972214	1	0.3929	0.3537	2	0.6886	1.182		1	BTB-00025197	1	2	DOM	9/5	152/118	0.595		1	BTB-00025197	1	2	REC	2/12	39/231	1
1	BovineHD0100015037	52999235	1	0.07143	0.09211	2	1	0.7582		1	BovineHD0100015037	1	2	DOM	1/13	48/218	0.4763		1	BovineHD0100015037	1	2	REC	1/13	1/265	0.09767
1	BTB-00025135	53112780	2	0.07143	0.06296	1	0.6954	1.145		1	BTB-00025135	2	1	DOM	1/13	34/236	1		1	BTB-00025135	2	1	REC	1/13	0/270	0.0493
1	Hapmap47174-BTA-110289	53135919	2	0.1071	0.1185	1	1	0.8925		1	Hapmap47174-BTA-110289	2	1	DOM	3/11	63/207	1		1	Hapmap47174-BTA-110289	2	1	REC	0/14	1/269	1
1	BTA-110282-no-rs	53167139	2	0.3214	0.2389	1	0.3652	1.509		1	BTA-110282-no-rs	2	1	DOM	9/5	111/159	0.1013		1	BTA-110282-no-rs	2	1	REC	0/14	18/252	1
1	ARS-BFGL-NGS-18743	53214714	2	0.3929	0.3653	1	0.8412	1.124		1	ARS-BFGL-NGS-18743	2	1	DOM	10/4	161/110	0.4178		1	ARS-BFGL-NGS-18743	2	1	REC	1/13	37/234	0.7017
1	Hapmap53221-rs29019635	53551793	2	0.3929	0.3489	1	0.686	1.208		1	Hapmap53221-rs29019635	2	1	DOM	10/4	155/113	0.4092		1	Hapmap53221-rs29019635	2	1	REC	1/13	32/236	1
1	Hapmap57738-rs29023662	53578419	2	0.2857	0.1586	1	0.1108	2.122		1	Hapmap57738-rs29023662	2	1	DOM	8/6	77/191	0.03461		1	Hapmap57738-rs29023662	2	1	REC	0/14	8/260	1
1	Hapmap48975-BTA-99363	53615323	2	0.1786	0.2519	1	0.5028	0.6458		1	Hapmap48975-BTA-99363	2	1	DOM	5/9	125/145	0.5847		1	Hapmap48975-BTA-99363	2	1	REC	0/14	11/259	1
1	BovineHD0100015213	53617929	2	0.6071	0.4173	1	0.05205	2.158		1	BovineHD0100015213	2	1	DOM	12/2	173/93	0.1502		1	BovineHD0100015213	2	1	REC	5/9	49/217	0.1554
1	ARS-BFGL-BAC-20881	53635724	1	0.2857	0.2926	2	1	0.9671		1	ARS-BFGL-BAC-20881	1	2	DOM	8/6	129/141	0.588		1	ARS-BFGL-BAC-20881	1	2	REC	0/14	29/241	0.3745
1	Hapmap61117-rs29023044	53657839	1	0.3214	0.2722	2	0.6641	1.266		1	Hapmap61117-rs29023044	1	2	DOM	9/5	127/143	0.2748		1	Hapmap61117-rs29023044	1	2	REC	0/14	20/250	0.6086
1	BovineHD0100015234	53682452	2	0.3214	0.2717	1	0.5237	1.27		1	BovineHD0100015234	2	1	DOM	9/5	125/140	0.2752		1	BovineHD0100015234	2	1	REC	0/14	19/246	0.6086
1	BovineHD0100015235	53683724	2	0.3214	0.2632	1	0.5127	1.326		1	BovineHD0100015235	2	1	DOM	9/5	123/143	0.2721		1	BovineHD0100015235	2	1	REC	0/14	17/249	1
1	BovineHD0100015236	53684659	1	0.3214	0.2632	2	0.5127	1.326		1	BovineHD0100015236	1	2	DOM	9/5	123/143	0.2721		1	BovineHD0100015236	1	2	REC	0/14	17/249	1
1	BTB-00026752	53685613	2	0.2857	0.2934	1	1	0.9635		1	BTB-00026752	2	1	DOM	8/6	130/141	0.5889		1	BTB-00026752	2	1	REC	0/14	29/242	0.3745
1	ARS-BFGL-NGS-106380	53713808	1	0.3214	0.2657	2	0.5157	1.309		1	ARS-BFGL-NGS-106380	1	2	DOM	9/5	125/146	0.2721		1	ARS-BFGL-NGS-106380	1	2	REC	0/14	19/252	0.6091
1	BovineHD0100015260	53749809	2	0.3214	0.344	1	1	0.9034		1	BovineHD0100015260	2	1	DOM	9/5	149/117	0.5931		1	BovineHD0100015260	2	1	REC	0/14	34/232	0.2308
1	BovineHD0100015261	53750481	2	0.3929	0.438	1	0.6992	0.8303		1	BovineHD0100015261	2	1	DOM	10/4	183/83	1		1	BovineHD0100015261	2	1	REC	1/13	50/216	0.4775
1	BTB-00026585	53760822	1	0	0.03321	2	1	0		1	BTB-00026585	1	2	DOM	0/14	18/253	1		1	BTB-00026585	1	2	REC	0/14	0/271	1
1	BTA-110335-no-rs	53841380	2	0.3571	0.393	1	0.8432	0.8581		1	BTA-110335-no-rs	2	1	DOM	10/4	167/104	0.5784		1	BTA-110335-no-rs	2	1	REC	0/14	46/225	0.1364
1	Hapmap38807-BTA-110324	53899179	2	0.3571	0.3432	1	0.8417	1.063		1	Hapmap38807-BTA-110324	2	1	DOM	10/4	151/120	0.2827		1	Hapmap38807-BTA-110324	2	1	REC	0/14	35/236	0.2303
1	ARS-BFGL-NGS-40967	53953481	2	0.3929	0.417	1	0.8467	0.9047		1	ARS-BFGL-NGS-40967	2	1	DOM	10/4	177/94	0.7775		1	ARS-BFGL-NGS-40967	2	1	REC	1/13	49/222	0.4765
1	Hapmap42092-BTA-119864	54101343	1	0.07143	0.1255	2	0.56	0.5362		1	Hapmap42092-BTA-119864	1	2	DOM	2/12	66/205	0.5303		1	Hapmap42092-BTA-119864	1	2	REC	0/14	2/269	1
1	ARS-BFGL-NGS-114712	54134361	2	0.3929	0.441	1	0.6984	0.8203		1	ARS-BFGL-NGS-114712	2	1	DOM	10/4	185/86	1		1	ARS-BFGL-NGS-114712	2	1	REC	1/13	54/217	0.3186
1	BovineHD0100015376	54170162	2	0.1429	0.1426	1	1	1.002		1	BovineHD0100015376	2	1	DOM	3/11	70/200	1		1	BovineHD0100015376	2	1	REC	1/13	7/263	0.3361
1	Hapmap49009-BTA-107212	54263653	2	0.1429	0.1974	1	0.6272	0.6776		1	Hapmap49009-BTA-107212	2	1	DOM	4/10	98/173	0.7763		1	Hapmap49009-BTA-107212	2	1	REC	0/14	9/262	1
1	BovineHD0100015401	54273282	2	0.2857	0.1852	1	0.2142	1.76		1	BovineHD0100015401	2	1	DOM	8/6	86/184	0.07662		1	BovineHD0100015401	2	1	REC	0/14	14/256	1
1	ARS-BFGL-NGS-43783	54347232	2	0.2857	0.2343	1	0.5011	1.307		1	ARS-BFGL-NGS-43783	2	1	DOM	8/6	114/157	0.2821		1	ARS-BFGL-NGS-43783	2	1	REC	0/14	13/258	1
1	BovineHD0100015437	54394177	1	0.25	0.145	2	0.1683	1.966		1	BovineHD0100015437	1	2	DOM	7/7	73/196	0.07381		1	BovineHD0100015437	1	2	REC	0/14	5/264	1
1	BTB-01712147	54417168	2	0.3214	0.3616	1	0.8403	0.8362		1	BTB-01712147	2	1	DOM	8/6	162/109	1		1	BTB-01712147	2	1	REC	1/13	34/237	1
1	BTB-01315615	54445733	2	0	0.01476	1	1	0		1	BTB-01315615	2	1	DOM	0/14	8/263	1		1	BTB-01315615	2	1	REC	0/14	0/271	1
1	BovineHD0100015457	54450675	2	0.3214	0.1685	1	0.06931	2.337		1	BovineHD0100015457	2	1	DOM	9/5	83/187	0.01583		1	BovineHD0100015457	2	1	REC	0/14	8/262	1
1	BTA-21826-no-rs	54530063	2	0.5714	0.4151	1	0.118	1.879		1	BTA-21826-no-rs	2	1	DOM	12/2	176/95	0.1501		1	BTA-21826-no-rs	2	1	REC	4/10	49/222	0.303
1	ARS-BFGL-NGS-86970	54568552	2	0.2143	0.09779	1	0.05838	2.516		1	ARS-BFGL-NGS-86970	2	1	DOM	6/8	52/219	0.04308		1	ARS-BFGL-NGS-86970	2	1	REC	0/14	1/270	1
1	BTB-01315516	54638306	1	0.2857	0.2232	2	0.4866	1.392		1	BTB-01315516	1	2	DOM	8/6	106/165	0.2624		1	BTB-01315516	1	2	REC	0/14	15/256	1
1	BovineHD0100015507	54652115	2	0.3214	0.3481	1	0.8413	0.8869		1	BovineHD0100015507	2	1	DOM	9/5	153/117	0.7831		1	BovineHD0100015507	2	1	REC	0/14	35/235	0.23
1	Hapmap47540-BTA-21819	54688405	1	0.3929	0.4557	2	0.5638	0.7728		1	Hapmap47540-BTA-21819	1	2	DOM	10/4	189/82	1		1	Hapmap47540-BTA-21819	1	2	REC	1/13	58/213	0.3139
1	Hapmap39813-BTA-21834	54732278	2	0.3214	0.2786	1	0.6671	1.227		1	Hapmap39813-BTA-21834	2	1	DOM	9/5	129/142	0.2776		1	Hapmap39813-BTA-21834	2	1	REC	0/14	22/249	0.6108
1	BTB-01315457	54755430	2	0.2857	0.3173	1	0.8365	0.8605		1	BTB-01315457	2	1	DOM	7/7	148/123	0.788		1	BTB-01315457	2	1	REC	1/13	24/247	1
1	BovineHD0100015543	54797676	1	0.3571	0.3579	2	1	0.9966		1	BovineHD0100015543	1	2	DOM	9/5	161/110	0.7871		1	BovineHD0100015543	1	2	REC	1/13	33/238	1
1	Hapmap51652-BTA-89898	54843886	2	0	0.01845	1	1	0		1	Hapmap51652-BTA-89898	2	1	DOM	0/14	10/261	1		1	Hapmap51652-BTA-89898	2	1	REC	0/14	0/271	1
1	BTB-01131103	54870276	2	0.3929	0.4207	1	0.846	0.8911		1	BTB-01131103	2	1	DOM	10/4	182/89	1		1	BTB-01131103	2	1	REC	1/13	46/225	0.4787
1	Hapmap49383-BTA-93867	54908193	2	0.3214	0.2574	1	0.5076	1.367		1	Hapmap49383-BTA-93867	2	1	DOM	9/5	120/150	0.1743		1	Hapmap49383-BTA-93867	2	1	REC	0/14	19/251	0.609
1	BTB-01131178	54941210	2	0.03571	0.1015	1	0.5083	0.3279		1	BTB-01131178	2	1	DOM	1/13	54/217	0.3186		1	BTB-01131178	2	1	REC	0/14	1/270	1
1	BTA-93863-no-rs	54969062	1	0.4286	0.3852	2	0.6927	1.197		1	BTA-93863-no-rs	1	2	DOM	9/5	167/103	1		1	BTA-93863-no-rs	1	2	REC	3/11	41/229	0.4616
1	ARS-BFGL-BAC-32896	55026335	2	0.5	0.4201	1	0.4367	1.381		1	ARS-BFGL-BAC-32896	2	1	DOM	10/4	181/88	1		1	ARS-BFGL-BAC-32896	2	1	REC	4/10	45/224	0.2743
1	Hapmap38361-BTA-93866	55051389	2	0.03571	0.1389	1	0.156	0.2296		1	Hapmap38361-BTA-93866	2	1	DOM	1/13	72/198	0.1257		1	Hapmap38361-BTA-93866	2	1	REC	0/14	3/267	1
1	BTB-01131384	55079792	1	0.07143	0.04982	2	0.6471	1.467		1	BTB-01131384	1	2	DOM	2/12	27/244	0.6417		1	BTB-01131384	1	2	REC	0/14	0/271	1
1	BTB-01914655	55130499	2	0.5	0.4185	1	0.4356	1.389		1	BTB-01914655	2	1	DOM	10/4	181/89	1		1	BTB-01914655	2	1	REC	4/10	45/225	0.2731
1	BovineHD0100015649	55258490	1	0.4286	0.4742	2	0.7006	0.8317		1	BovineHD0100015649	1	2	DOM	11/3	199/72	1		1	BovineHD0100015649	1	2	REC	1/13	58/213	0.3139
1	BovineHD0100015656	55291541	1	0.25	0.137	2	0.1002	2.099		1	BovineHD0100015656	1	2	DOM	7/7	71/199	0.06637		1	BovineHD0100015656	1	2	REC	0/14	3/267	1
1	ARS-BFGL-NGS-115305	55369328	1	0.25	0.1352	2	0.09621	2.132		1	ARS-BFGL-NGS-115305	1	2	DOM	7/7	67/203	0.05597		1	ARS-BFGL-NGS-115305	1	2	REC	0/14	6/264	1
1	Hapmap32092-BTA-149957	55395795	1	0.3571	0.2989	2	0.5295	1.303		1	Hapmap32092-BTA-149957	1	2	DOM	9/5	139/132	0.4172		1	Hapmap32092-BTA-149957	1	2	REC	1/13	23/248	1
1	ARS-BFGL-NGS-85105	55417768	1	0.6071	0.4686	2	0.1764	1.752		1	ARS-BFGL-NGS-85105	1	2	DOM	13/1	195/76	0.1222		1	ARS-BFGL-NGS-85105	1	2	REC	4/10	59/212	0.5187
1	BovineHD0100015703	55476049	1	0.1786	0.3007	2	0.2049	0.5055		1	BovineHD0100015703	1	2	DOM	5/9	140/131	0.2824		1	BovineHD0100015703	1	2	REC	0/14	23/248	0.6132
1	Hapmap47445-BTA-93870	55515620	1	0.5357	0.342	2	0.04291	2.22		1	Hapmap47445-BTA-93870	1	2	DOM	12/2	152/117	0.04839		1	Hapmap47445-BTA-93870	1	2	REC	3/11	32/237	0.3932
1	Hapmap33225-BTA-151395	55580815	1	0.07143	0.1771	2	0.2002	0.3574		1	Hapmap33225-BTA-151395	1	2	DOM	1/13	88/183	0.07151		1	Hapmap33225-BTA-151395	1	2	REC	1/13	8/263	0.3687
1	BovineHD4100000306	55595254	2	0.3846	0.3377	1	0.6731	1.226		1	BovineHD4100000306	2	1	DOM	8/5	146/122	0.7776		1	BovineHD4100000306	2	1	REC	2/11	35/233	0.6833
1	BovineHD0100015754	55616621	2	0.3929	0.4004	1	1	0.9691		1	BovineHD0100015754	2	1	DOM	9/5	169/102	1		1	BovineHD0100015754	2	1	REC	2/12	48/223	1
1	ARS-BFGL-NGS-39684	55670650	1	0	0.03321	2	1	0		1	ARS-BFGL-NGS-39684	1	2	DOM	0/14	18/253	1		1	ARS-BFGL-NGS-39684	1	2	REC	0/14	0/271	1
1	Hapmap43173-BTA-120253	55779057	1	0.2857	0.3395	2	0.6832	0.7783		1	Hapmap43173-BTA-120253	1	2	DOM	7/7	157/114	0.5888		1	Hapmap43173-BTA-120253	1	2	REC	1/13	27/244	1
1	BovineHD0100015822	55837262	1	0.3929	0.4963	2	0.3349	0.6567		1	BovineHD0100015822	1	2	DOM	9/5	199/71	0.5354		1	BovineHD0100015822	1	2	REC	2/12	69/201	0.529
1	BTA-25876-no-rs	56134816	2	0.3929	0.3796	1	1	1.057		1	BTA-25876-no-rs	2	1	DOM	9/5	164/106	1		1	BTA-25876-no-rs	2	1	REC	2/12	41/229	1
1	BovineHD0100015894	56151365	2	0.6071	0.4428	1	0.1182	1.945		1	BovineHD0100015894	2	1	DOM	12/2	183/88	0.2382		1	BovineHD0100015894	2	1	REC	5/9	57/214	0.1945
1	ARS-BFGL-NGS-97046	56196281	1	0.5714	0.4317	2	0.1728	1.755		1	ARS-BFGL-NGS-97046	1	2	DOM	12/2	181/90	0.239		1	ARS-BFGL-NGS-97046	1	2	REC	4/10	53/218	0.49
1	BTA-25809-no-rs	56253478	2	0.3571	0.4815	1	0.2454	0.5981		1	BTA-25809-no-rs	2	1	DOM	8/6	199/72	0.2189		1	BTA-25809-no-rs	2	1	REC	2/12	62/209	0.7426
1	ARS-BFGL-NGS-38890	56446383	2	0.03571	0.131	1	0.2371	0.2457		1	ARS-BFGL-NGS-38890	2	1	DOM	1/13	67/204	0.1997		1	ARS-BFGL-NGS-38890	2	1	REC	0/14	4/267	1
1	ARS-BFGL-NGS-59270	56483517	2	0	0.1661	1	0.01378	0		1	ARS-BFGL-NGS-59270	2	1	DOM	0/14	82/189	0.01258		1	ARS-BFGL-NGS-59270	2	1	REC	0/14	8/263	1
1	BovineHD0100016081	56504825	1	0.3214	0.3704	2	0.6905	0.8053		1	BovineHD0100016081	1	2	DOM	9/5	163/107	1		1	BovineHD0100016081	1	2	REC	0/14	37/233	0.2281
1	ARS-BFGL-NGS-15221	56564301	1	0.03571	0.01661	2	0.3982	2.193		1	ARS-BFGL-NGS-15221	1	2	DOM	1/13	9/262	0.4007		1	ARS-BFGL-NGS-15221	1	2	REC	0/14	0/271	1
1	ARS-BFGL-NGS-52696	56632142	1	0	0.1292	2	0.03732	0		1	ARS-BFGL-NGS-52696	1	2	DOM	0/14	65/206	0.04497		1	ARS-BFGL-NGS-52696	1	2	REC	0/14	5/266	1
1	Hapmap39218-BTA-25795	56722807	1	0.3214	0.3708	2	0.6904	0.8036		1	Hapmap39218-BTA-25795	1	2	DOM	9/5	162/109	0.7883		1	Hapmap39218-BTA-25795	1	2	REC	0/14	39/232	0.2292
1	ARS-BFGL-NGS-89	56752229	1	0	0.1981	2	0.004759	0		1	ARS-BFGL-NGS-89	1	2	DOM	0/14	100/170	0.002805		1	ARS-BFGL-NGS-89	1	2	REC	0/14	7/263	1
1	UA-IFASA-5597	56790295	1	0.3214	0.4446	2	0.2431	0.5916		1	UA-IFASA-5597	1	2	DOM	8/6	192/79	0.3676		1	UA-IFASA-5597	1	2	REC	1/13	49/222	0.4765
1	ARS-BFGL-NGS-18996	56841984	1	0.5357	0.4004	2	0.1706	1.728		1	ARS-BFGL-NGS-18996	1	2	DOM	13/1	173/98	0.03959		1	ARS-BFGL-NGS-18996	1	2	REC	2/12	44/227	1
1	BovineHD0100016232	56873807	1	0.4286	0.4611	2	0.8466	0.8765		1	BovineHD0100016232	1	2	DOM	10/4	189/81	1		1	BovineHD0100016232	1	2	REC	2/12	60/210	0.7415
1	BovineHD0100016238	56903414	1	0.3571	0.4315	2	0.5577	0.732		1	BovineHD0100016238	1	2	DOM	7/7	184/86	0.2404		1	BovineHD0100016238	1	2	REC	3/11	49/221	0.726
1	Hapmap59481-rs29019616	56944392	2	0.1071	0.1255	1	1	0.8365		1	Hapmap59481-rs29019616	2	1	DOM	3/11	63/208	1		1	Hapmap59481-rs29019616	2	1	REC	0/14	5/266	1
1	BovineHD0100016281	56978092	1	0.5357	0.4815	2	0.6989	1.243		1	BovineHD0100016281	1	2	DOM	13/1	207/63	0.2037		1	BovineHD0100016281	1	2	REC	2/12	53/217	1
1	BovineHD0100016287	56995206	2	0.1786	0.2667	1	0.3817	0.5978		1	BovineHD0100016287	2	1	DOM	5/9	124/146	0.5853		1	BovineHD0100016287	2	1	REC	0/14	20/250	0.6086
1	BovineHD0100016294	57006702	1	0.25	0.4022	2	0.1172	0.4954		1	BovineHD0100016294	1	2	DOM	5/9	183/88	0.0201		1	BovineHD0100016294	1	2	REC	2/12	35/236	0.7005
1	Hapmap44594-BTA-25389	57029947	2	0.07143	0.2786	1	0.01478	0.1992		1	Hapmap44594-BTA-25389	2	1	DOM	2/12	136/135	0.01147		1	Hapmap44594-BTA-25389	2	1	REC	0/14	15/256	1
1	BTA-25403-no-rs	57147119	2	0.1429	0.1347	1	0.782	1.071		1	BTA-25403-no-rs	2	1	DOM	4/10	67/204	0.7543		1	BTA-25403-no-rs	2	1	REC	0/14	6/265	1
1	ARS-BFGL-NGS-34519	57180246	1	0	0.03321	2	1	0		1	ARS-BFGL-NGS-34519	1	2	DOM	0/14	18/253	1		1	ARS-BFGL-NGS-34519	1	2	REC	0/14	0/271	1
1	Hapmap38147-BTA-25404	57217658	2	0.4286	0.3173	1	0.2204	1.613		1	Hapmap38147-BTA-25404	2	1	DOM	12/2	148/123	0.02621		1	Hapmap38147-BTA-25404	2	1	REC	0/14	24/247	0.6164
1	ARS-BFGL-NGS-102073	57249444	1	0	0.0738	2	0.2486	0		1	ARS-BFGL-NGS-102073	1	2	DOM	0/14	39/232	0.2292		1	ARS-BFGL-NGS-102073	1	2	REC	0/14	1/270	1
1	BovineHD0100016358	57269695	2	0.2857	0.2204	1	0.4841	1.415		1	BovineHD0100016358	2	1	DOM	8/6	101/169	0.1635		1	BovineHD0100016358	2	1	REC	0/14	18/252	1
1	Hapmap55498-ss46527080	57309255	1	0.3929	0.3542	2	0.689	1.18		1	Hapmap55498-ss46527080	1	2	DOM	11/3	158/113	0.1681		1	Hapmap55498-ss46527080	1	2	REC	0/14	34/237	0.3871
1	BovineHD0100016374	57354786	2	0.2857	0.2362	1	0.5042	1.294		1	BovineHD0100016374	2	1	DOM	8/6	107/164	0.2637		1	BovineHD0100016374	2	1	REC	0/14	21/250	0.6093
1	ARS-BFGL-NGS-94399	57399338	2	0	0.1181	1	0.06084	0		1	ARS-BFGL-NGS-94399	2	1	DOM	0/14	61/210	0.04584		1	ARS-BFGL-NGS-94399	2	1	REC	0/14	3/268	1
1	ARS-BFGL-NGS-109258	57447817	1	0	0.0738	2	0.2486	0		1	ARS-BFGL-NGS-109258	1	2	DOM	0/14	39/232	0.2292		1	ARS-BFGL-NGS-109258	1	2	REC	0/14	1/270	1
1	ARS-BFGL-NGS-112451	57469104	1	0.5	0.4483	2	0.6977	1.23		1	ARS-BFGL-NGS-112451	1	2	DOM	11/3	193/78	0.7635		1	ARS-BFGL-NGS-112451	1	2	REC	3/11	50/221	0.7292
1	ARS-BFGL-NGS-87988	57496780	2	0	0.07407	1	0.2488	0		1	ARS-BFGL-NGS-87988	2	1	DOM	0/14	39/231	0.2293		1	ARS-BFGL-NGS-87988	2	1	REC	0/14	1/269	1
1	BovineHD0100016445	57668777	2	0.4643	0.4007	1	0.5556	1.296		1	BovineHD0100016445	2	1	DOM	10/4	177/90	0.7798		1	BovineHD0100016445	2	1	REC	3/11	37/230	0.4297
1	BovineHD0100016455	57703184	2	0.5714	0.3579	1	0.02717	2.392		1	BovineHD0100016455	2	1	DOM	12/2	161/110	0.05388		1	BovineHD0100016455	2	1	REC	4/10	33/238	0.09237
1	BovineHD0100016466	57757427	2	0.3214	0.2659	1	0.5159	1.308		1	BovineHD0100016466	2	1	DOM	9/5	125/142	0.2739		1	BovineHD0100016466	2	1	REC	0/14	17/250	1
1	BovineHD0100016479	57824017	1	0.3214	0.3948	2	0.5525	0.726		1	BovineHD0100016479	1	2	DOM	8/6	169/102	0.7798		1	BovineHD0100016479	1	2	REC	1/13	45/226	0.7069
1	BovineHD0100016540	57991815	2	0.25	0.4157	1	0.1132	0.4685		1	BovineHD0100016540	2	1	DOM	7/7	179/88	0.246		1	BovineHD0100016540	2	1	REC	0/14	43/224	0.1379
1	ARS-BFGL-NGS-40337	58000696	1	0.4286	0.4336	2	1	0.9798		1	ARS-BFGL-NGS-40337	1	2	DOM	9/5	183/88	0.7769		1	ARS-BFGL-NGS-40337	1	2	REC	3/11	52/219	0.7377
1	BovineHD0100016543	58010555	2	0.3214	0.264	1	0.5137	1.32		1	BovineHD0100016543	2	1	DOM	8/6	122/145	0.4243		1	BovineHD0100016543	2	1	REC	1/13	19/248	1
1	BovineHD0100016547	58022228	1	0.5714	0.4682	2	0.3338	1.515		1	BovineHD0100016547	1	2	DOM	12/2	193/74	0.3647		1	BovineHD0100016547	1	2	REC	4/10	57/210	0.5122
1	BovineHD0100016552	58037238	1	0.3571	0.4111	2	0.6944	0.7958		1	BovineHD0100016552	1	2	DOM	8/6	174/96	0.5789		1	BovineHD0100016552	1	2	REC	2/12	48/222	1
1	BovineHD0100016570	58101934	1	0.2143	0.2177	2	1	0.98		1	BovineHD0100016570	1	2	DOM	6/8	103/168	0.7809		1	BovineHD0100016570	1	2	REC	0/14	15/256	1
1	BovineHD0100016583	58142540	2	0.1786	0.1273	1	0.3919	1.49		1	BovineHD0100016583	2	1	DOM	4/10	67/204	0.7543		1	BovineHD0100016583	2	1	REC	1/13	2/269	0.1407
1	Hapmap36459-SCAFFOLD9563_462	58250592	1	0.1786	0.2214	2	0.8148	0.7645		1	Hapmap36459-SCAFFOLD9563_462	1	2	DOM	4/10	108/163	0.5764		1	Hapmap36459-SCAFFOLD9563_462	1	2	REC	1/13	12/259	0.488
1	Hapmap23307-BTA-124083	58277309	2	0	0.0369	1	0.6158	0		1	Hapmap23307-BTA-124083	2	1	DOM	0/14	20/251	0.6087		1	Hapmap23307-BTA-124083	2	1	REC	0/14	0/271	1
1	ARS-BFGL-NGS-103637	58315322	2	0.1429	0.1389	1	1	1.033		1	ARS-BFGL-NGS-103637	2	1	DOM	3/11	71/199	1		1	ARS-BFGL-NGS-103637	2	1	REC	1/13	4/266	0.2248
1	BovineHD0100016660	58350244	1	0.4643	0.4188	2	0.6964	1.203		1	BovineHD0100016660	1	2	DOM	10/4	183/88	1		1	BovineHD0100016660	1	2	REC	3/11	44/227	0.7093
1	BovineHD0100016692	58509867	1	0.03571	0.09888	2	0.5046	0.3375		1	BovineHD0100016692	1	2	DOM	1/13	52/216	0.4802		1	BovineHD0100016692	1	2	REC	0/14	1/267	1
1	BovineHD0100016696	58530676	1	0.5357	0.4663	2	0.5613	1.321		1	BovineHD0100016696	1	2	DOM	11/3	192/75	0.7639		1	BovineHD0100016696	1	2	REC	4/10	57/210	0.5122
1	BovineHD0100016697	58535639	1	0.5357	0.4663	2	0.5613	1.321		1	BovineHD0100016697	1	2	DOM	11/3	192/75	0.7639		1	BovineHD0100016697	1	2	REC	4/10	57/210	0.5122
1	Hapmap44172-BTA-96950	58540410	1	0.5357	0.4649	2	0.5612	1.328		1	Hapmap44172-BTA-96950	1	2	DOM	11/3	195/76	0.764		1	Hapmap44172-BTA-96950	1	2	REC	4/10	57/214	0.5077
1	BovineHD0100046466	58586597	2	0.2857	0.1315	1	0.04272	2.642		1	BovineHD0100046466	2	1	DOM	8/6	65/205	0.0104		1	BovineHD0100046466	2	1	REC	0/14	6/264	1
1	Hapmap47450-BTA-96948	58626471	1	0.3571	0.3506	2	1	1.029		1	Hapmap47450-BTA-96948	1	2	DOM	10/4	157/114	0.4097		1	Hapmap47450-BTA-96948	1	2	REC	0/14	33/238	0.383
1	BovineHD0100016719	58630970	2	0.03571	0.1033	1	0.3447	0.3214		1	BovineHD0100016719	2	1	DOM	1/13	54/217	0.3186		1	BovineHD0100016719	2	1	REC	0/14	2/269	1
1	BovineHD0100016728	58675214	2	0	0.2305	1	0.001527	0		1	BovineHD0100016728	2	1	DOM	0/14	117/152	0.0005118		1	BovineHD0100016728	2	1	REC	0/14	7/262	1
1	BTA-96949-no-rs	58773333	1	0.3214	0.3616	2	0.8403	0.8362		1	BTA-96949-no-rs	1	2	DOM	9/5	163/108	1		1	BTA-96949-no-rs	1	2	REC	0/14	33/238	0.383
1	BovineHD0100016781	58803748	2	0.1071	0.2556	1	0.1132	0.3496		1	BovineHD0100016781	2	1	DOM	3/11	119/151	0.1061		1	BovineHD0100016781	2	1	REC	0/14	19/251	0.609
1	BTA-31615-no-rs	58830804	1	0.1071	0.3192	2	0.01949	0.256		1	BTA-31615-no-rs	1	2	DOM	3/11	149/122	0.02461		1	BTA-31615-no-rs	1	2	REC	0/14	24/247	0.6164
1	BovineHD0100016763	58880630	2	0.07692	0.3545	1	0.002482	0.1518		1	BovineHD0100016763	2	1	DOM	2/11	161/107	0.002391		1	BovineHD0100016763	2	1	REC	0/13	29/239	0.3741
1	Hapmap44328-BTA-97952	58885004	1	0	0.1439	2	0.02279	0		1	Hapmap44328-BTA-97952	1	2	DOM	0/14	74/197	0.02435		1	Hapmap44328-BTA-97952	1	2	REC	0/14	4/267	1
1	BovineHD0100016802	58914092	2	0.1071	0.2082	1	0.236	0.4564		1	BovineHD0100016802	2	1	DOM	3/11	103/166	0.2641		1	BovineHD0100016802	2	1	REC	0/14	9/260	1
1	ARS-USMARC-Parent-DQ404150-rs29012530	58965351	1	0.1071	0.2435	2	0.1133	0.3727		1	ARS-USMARC-Parent-DQ404150-rs29012530	1	2	DOM	3/11	117/154	0.1641		1	ARS-USMARC-Parent-DQ404150-rs29012530	1	2	REC	0/14	15/256	1
1	UA-IFASA-2169	58991146	1	0.2857	0.2583	2	0.8251	1.149		1	UA-IFASA-2169	1	2	DOM	8/6	125/146	0.5844		1	UA-IFASA-2169	1	2	REC	0/14	15/256	1
1	BovineHD0100016837	58999514	1	0.4231	0.4739	2	0.6899	0.8142		1	BovineHD0100016837	1	2	DOM	9/4	203/65	0.5286		1	BovineHD0100016837	1	2	REC	2/11	51/217	1
1	BovineHD0100016850	59041533	1	0.1786	0.437	2	0.009557	0.28		1	BovineHD0100016850	1	2	DOM	4/10	192/78	0.001701		1	BovineHD0100016850	1	2	REC	1/13	44/226	0.7052
1	BTB-00028136	59116837	1	0.25	0.2196	2	0.647	1.185		1	BTB-00028136	1	2	DOM	7/7	108/163	0.578		1	BTB-00028136	1	2	REC	0/14	11/260	1
1	BTB-01868157	59146697	1	0.07143	0.1033	2	1	0.6676		1	BTB-01868157	1	2	DOM	2/12	53/218	1		1	BTB-01868157	1	2	REC	0/14	3/268	1
1	BovineHD0100016878	59159905	1	0.4643	0.4167	2	0.6956	1.213		1	BovineHD0100016878	1	2	DOM	11/3	177/93	0.3959		1	BovineHD0100016878	1	2	REC	2/12	48/222	1
1	BTB-00028238	59203569	1	0.25	0.3376	2	0.414	0.6539		1	BTB-00028238	1	2	DOM	7/7	151/120	0.785		1	BTB-00028238	1	2	REC	0/14	32/239	0.3796
1	Hapmap48289-BTA-31617	59240053	2	0.07143	0.1347	1	0.5636	0.4942		1	Hapmap48289-BTA-31617	2	1	DOM	2/12	68/203	0.529		1	Hapmap48289-BTA-31617	2	1	REC	0/14	5/266	1
1	ARS-BFGL-NGS-94997	59266659	1	0.1429	0.2362	2	0.3582	0.5391		1	ARS-BFGL-NGS-94997	1	2	DOM	4/10	114/157	0.4097		1	ARS-BFGL-NGS-94997	1	2	REC	0/14	14/257	1
1	BovineHD0100016948	59444156	2	0.5	0.3506	1	0.1555	1.853		1	BovineHD0100016948	2	1	DOM	12/2	160/111	0.05262		1	BovineHD0100016948	2	1	REC	2/12	30/241	0.6621
1	BovineHD0100016955	59474636	2	0.3929	0.393	1	1	0.9994		1	BovineHD0100016955	2	1	DOM	11/3	172/99	0.3918		1	BovineHD0100016955	2	1	REC	0/14	41/230	0.2329
1	BovineHD0100016959	59498681	1	0.1786	0.1882	2	1	0.9378		1	BovineHD0100016959	1	2	DOM	4/10	92/179	0.7791		1	BovineHD0100016959	1	2	REC	1/13	10/261	0.4312
1	Hapmap48717-BTA-31633	59520349	1	0.25	0.3653	2	0.234	0.5791		1	Hapmap48717-BTA-31633	1	2	DOM	6/8	166/105	0.2615		1	Hapmap48717-BTA-31633	1	2	REC	1/13	32/239	1
1	BTB-00028647	59555496	1	0.5714	0.3303	2	0.01306	2.704		1	BTB-00028647	1	2	DOM	13/1	149/122	0.00466		1	BTB-00028647	1	2	REC	3/11	30/241	0.212
1	BovineHD0100016992	59659477	2	0.1786	0.2444	1	0.5046	0.6719		1	BovineHD0100016992	2	1	DOM	4/10	117/153	0.4071		1	BovineHD0100016992	2	1	REC	1/13	15/255	0.5646
1	Hapmap31065-BTA-123406	59686995	2	0.1786	0.2768	1	0.3828	0.5681		1	Hapmap31065-BTA-123406	2	1	DOM	4/10	132/139	0.1752		1	Hapmap31065-BTA-123406	2	1	REC	1/13	18/253	1
1	BovineHD0100017003	59704724	1	0.25	0.4222	2	0.07867	0.4561		1	BovineHD0100017003	1	2	DOM	6/8	190/80	0.03907		1	BovineHD0100017003	1	2	REC	1/13	38/232	0.7008
1	BTA-31638-no-rs	59733534	2	0	0.02952	1	1	0		1	BTA-31638-no-rs	2	1	DOM	0/14	16/255	1		1	BTA-31638-no-rs	2	1	REC	0/14	0/271	1
1	ARS-BFGL-NGS-110620	59777594	1	0.07143	0.1771	2	0.2002	0.3574		1	ARS-BFGL-NGS-110620	1	2	DOM	2/12	88/183	0.2382		1	ARS-BFGL-NGS-110620	1	2	REC	0/14	8/263	1
1	BovineHD0100017026	59780658	1	0.4643	0.4207	2	0.6971	1.194		1	BovineHD0100017026	1	2	DOM	11/3	179/92	0.3987		1	BovineHD0100017026	1	2	REC	2/12	49/222	1
1	BovineHD0100017032	59814364	1	0.3929	0.2389	2	0.07365	2.062		1	BovineHD0100017032	1	2	DOM	11/3	111/159	0.01007		1	BovineHD0100017032	1	2	REC	0/14	18/252	1
1	BovineHD0100017052	59896010	1	0.07692	0.1654	2	0.4089	0.4204		1	BovineHD0100017052	1	2	DOM	2/11	81/188	0.3574		1	BovineHD0100017052	1	2	REC	0/13	8/261	1
1	Hapmap47563-BTA-31648	59924376	2	0.1786	0.3044	1	0.2042	0.4967		1	Hapmap47563-BTA-31648	2	1	DOM	4/10	145/126	0.09825		1	Hapmap47563-BTA-31648	2	1	REC	1/13	20/251	1
1	BovineHD0100017076	59960792	1	0.1786	0.3148	2	0.146	0.4731		1	BovineHD0100017076	1	2	DOM	4/10	148/122	0.09603		1	BovineHD0100017076	1	2	REC	1/13	22/248	1
1	ARS-BFGL-NGS-36297	59980590	1	0.25	0.3745	2	0.2294	0.5567		1	ARS-BFGL-NGS-36297	1	2	DOM	6/8	170/101	0.1624		1	ARS-BFGL-NGS-36297	1	2	REC	1/13	33/238	1
1	BovineHD0100017085	59982960	2	0.4286	0.5	1	0.5619	0.75		1	BovineHD0100017085	2	1	DOM	12/2	200/68	0.5289		1	BovineHD0100017085	2	1	REC	0/14	68/200	0.02563
1	BovineHD4100000339	60006646	2	0.5357	0.1914	1	8.79e-05	4.873		1	BovineHD4100000339	2	1	DOM	13/1	96/173	2.418e-05		1	BovineHD4100000339	2	1	REC	2/12	7/262	0.06712
1	ARS-BFGL-NGS-115239	60022954	2	0.07143	0.2749	1	0.01496	0.2029		1	ARS-BFGL-NGS-115239	2	1	DOM	2/12	132/139	0.01291		1	ARS-BFGL-NGS-115239	2	1	REC	0/14	17/254	1
1	BovineHD0100017119	60087869	2	0.4286	0.417	1	1	1.049		1	BovineHD0100017119	2	1	DOM	11/3	183/88	0.5593		1	BovineHD0100017119	2	1	REC	1/13	43/228	0.7033
1	BovineHD0100017124	60123244	2	0.6071	0.4389	1	0.1175	1.976		1	BovineHD0100017124	2	1	DOM	14/0	190/80	0.01279		1	BovineHD0100017124	2	1	REC	3/11	47/223	0.7187
1	BTB-02009342	60212971	2	0.4643	0.3192	1	0.1462	1.849		1	BTB-02009342	2	1	DOM	12/2	150/121	0.02763		1	BTB-02009342	2	1	REC	1/13	23/248	1
1	BTA-23353-no-rs	60247154	2	0.6429	0.4114	1	0.01851	2.575		1	BTA-23353-no-rs	2	1	DOM	14/0	181/90	0.006245		1	BTA-23353-no-rs	2	1	REC	4/10	42/229	0.2533
1	ARS-BFGL-NGS-117152	60275851	1	0.3929	0.2583	2	0.1262	1.858		1	ARS-BFGL-NGS-117152	1	2	DOM	11/3	122/149	0.02461		1	ARS-BFGL-NGS-117152	1	2	REC	0/14	18/253	1
1	UA-IFASA-7336	60313183	1	0.07143	0.1642	2	0.2885	0.3915		1	UA-IFASA-7336	1	2	DOM	2/12	83/188	0.243		1	UA-IFASA-7336	1	2	REC	0/14	6/265	1
1	BovineHD0100017217	60339396	1	0.2143	0.3852	2	0.07439	0.4353		1	BovineHD0100017217	1	2	DOM	6/8	169/101	0.1635		1	BovineHD0100017217	1	2	REC	0/14	39/231	0.2293
1	Hapmap57078-ss46526391	60407283	2	0.1429	0.2509	1	0.2613	0.4975		1	Hapmap57078-ss46526391	2	1	DOM	4/10	122/149	0.2778		1	Hapmap57078-ss46526391	2	1	REC	0/14	14/257	1
1	ARS-BFGL-NGS-30543	60434371	1	0.2857	0.4428	2	0.1195	0.5033		1	ARS-BFGL-NGS-30543	1	2	DOM	7/7	194/77	0.1282		1	ARS-BFGL-NGS-30543	1	2	REC	1/13	46/225	0.4787
1	BTB-00029666	60476588	2	0.2857	0.428	1	0.1702	0.5345		1	BTB-00029666	2	1	DOM	7/7	180/91	0.2507		1	BTB-00029666	2	1	REC	1/13	52/219	0.4793
1	BovineHD0100017270	60497520	1	0	0.02037	2	1	0		1	BovineHD0100017270	1	2	DOM	0/14	11/259	1		1	BovineHD0100017270	1	2	REC	0/14	0/270	1
1	Hapmap48290-BTA-31675	60519622	2	0.7143	0.4336	1	0.005453	3.266		1	Hapmap48290-BTA-31675	2	1	DOM	14/0	191/80	0.01285		1	Hapmap48290-BTA-31675	2	1	REC	6/8	44/227	0.0212
1	Hapmap42177-BTA-31679	60575311	1	0.3214	0.2934	2	0.8319	1.141		1	Hapmap42177-BTA-31679	1	2	DOM	9/5	138/133	0.4155		1	Hapmap42177-BTA-31679	1	2	REC	0/14	21/250	0.6093
1	Hapmap35167-VSWCP1D5775A_scf01	60638907	2	0.2143	0.3413	1	0.2182	0.5263		1	Hapmap35167-VSWCP1D5775A_scf01	2	1	DOM	6/8	155/116	0.408		1	Hapmap35167-VSWCP1D5775A_scf01	2	1	REC	0/14	30/241	0.3753
1	BovineHD0100017342	60645127	2	0.1429	0.2045	1	0.6283	0.6485		1	BovineHD0100017342	2	1	DOM	4/10	99/170	0.7767		1	BovineHD0100017342	2	1	REC	0/14	11/258	1
1	ARS-BFGL-NGS-107624	60678008	2	0.2143	0.2232	1	1	0.9489		1	ARS-BFGL-NGS-107624	2	1	DOM	6/8	110/161	1		1	ARS-BFGL-NGS-107624	2	1	REC	0/14	11/260	1
1	BTB-00030270	60709251	2	0.1071	0.04797	1	0.1647	2.382		1	BTB-00030270	2	1	DOM	2/12	25/246	0.63		1	BTB-00030270	2	1	REC	1/13	1/270	0.096
1	ARS-BFGL-NGS-3821	60736616	1	0.4643	0.3708	2	0.324	1.47		1	ARS-BFGL-NGS-3821	1	2	DOM	11/3	161/110	0.1744		1	ARS-BFGL-NGS-3821	1	2	REC	2/12	40/231	1
1	Hapmap41191-BTA-16674	60779046	2	0.1071	0.2915	1	0.0326	0.2916		1	Hapmap41191-BTA-16674	2	1	DOM	3/11	135/136	0.05309		1	Hapmap41191-BTA-16674	2	1	REC	0/14	23/248	0.6132
1	BTB-02006134	60806613	2	0.6071	0.4834	1	0.2458	1.652		1	BTB-02006134	2	1	DOM	14/0	198/73	0.02433		1	BTB-02006134	2	1	REC	3/11	64/207	1
1	Hapmap59735-rs29016420	60831272	2	0.6071	0.3321	1	0.004047	3.108		1	Hapmap59735-rs29016420	2	1	DOM	14/0	155/116	0.001084		1	Hapmap59735-rs29016420	2	1	REC	3/11	25/246	0.1479
1	BovineHD0100017398	60831984	1	0.5357	0.1956	2	0.0001111	4.746		1	BovineHD0100017398	1	2	DOM	13/1	98/173	2.81e-05		1	BovineHD0100017398	1	2	REC	2/12	8/263	0.08052
1	ARS-BFGL-BAC-20015	60899823	1	0.5714	0.4317	2	0.1728	1.755		1	ARS-BFGL-BAC-20015	1	2	DOM	12/2	185/86	0.2389		1	ARS-BFGL-BAC-20015	1	2	REC	4/10	49/222	0.303
1	BovineHD0100017425	60943734	1	0.5357	0.237	2	0.001135	3.714		1	BovineHD0100017425	1	2	DOM	13/1	116/154	0.0003664		1	BovineHD0100017425	1	2	REC	2/12	12/258	0.1462
1	BTB-00031129	60979138	1	0.1429	0.03875	2	0.02886	4.135		1	BTB-00031129	1	2	DOM	4/10	21/250	0.02539		1	BTB-00031129	1	2	REC	0/14	0/271	1
1	BovineHD0100017450	61036146	2	0.1786	0.3727	1	0.04324	0.3659		1	BovineHD0100017450	2	1	DOM	5/9	169/102	0.05365		1	BovineHD0100017450	2	1	REC	0/14	33/238	0.383
1	BovineHD0100017461	61075432	2	0.25	0.2574	1	1	0.9616		1	BovineHD0100017461	2	1	DOM	6/8	122/148	1		1	BovineHD0100017461	2	1	REC	1/13	17/253	0.609
1	BTB-00030962	61100002	2	0.07143	0.1937	1	0.1366	0.3201		1	BTB-00030962	2	1	DOM	2/12	92/179	0.1543		1	BTB-00030962	2	1	REC	0/14	13/258	1
1	Hapmap38402-BTA-32592	61128757	1	0.6429	0.428	2	0.03124	2.405		1	Hapmap38402-BTA-32592	1	2	DOM	13/1	183/88	0.07151		1	Hapmap38402-BTA-32592	1	2	REC	5/9	49/222	0.1517
1	BTB-00030894	61160105	2	0.2143	0.2565	1	0.8241	0.7907		1	BTB-00030894	2	1	DOM	6/8	126/145	1		1	BTB-00030894	2	1	REC	0/14	13/258	1
1	BTA-31690-no-rs	61189193	2	0	0.01292	1	1	0		1	BTA-31690-no-rs	2	1	DOM	0/14	7/264	1		1	BTA-31690-no-rs	2	1	REC	0/14	0/271	1
1	BTB-00030699	61219155	2	0.1071	0.1181	1	1	0.8962		1	BTB-00030699	2	1	DOM	3/11	60/211	1		1	BTB-00030699	2	1	REC	0/14	4/267	1
1	ARS-BFGL-NGS-27164	61244179	2	0	0.05166	1	0.3881	0		1	ARS-BFGL-NGS-27164	2	1	DOM	0/14	26/245	0.6249		1	ARS-BFGL-NGS-27164	2	1	REC	0/14	2/269	1
1	BovineHD0100017541	61290448	2	0.6071	0.3561	1	0.00903	2.795		1	BovineHD0100017541	2	1	DOM	14/0	159/112	0.001115		1	BovineHD0100017541	2	1	REC	3/11	34/237	0.4036
1	BTB-00030560	61312093	1	0	0.04428	2	0.6233	0		1	BTB-00030560	1	2	DOM	0/14	23/248	0.6132		1	BTB-00030560	1	2	REC	0/14	1/270	1
1	Hapmap53538-rs29018897	61346083	2	0.2143	0.2768	1	0.6638	0.7127		1	Hapmap53538-rs29018897	2	1	DOM	6/8	133/138	0.7861		1	Hapmap53538-rs29018897	2	1	REC	0/14	17/254	1
1	ARS-BFGL-NGS-2189	61409890	1	0.25	0.4244	2	0.07789	0.4522		1	ARS-BFGL-NGS-2189	1	2	DOM	7/7	185/86	0.24		1	ARS-BFGL-NGS-2189	1	2	REC	0/14	45/226	0.1368
1	BovineHD0100017600	61470011	2	0.25	0.4926	1	0.01844	0.3433		1	BovineHD0100017600	2	1	DOM	7/7	203/68	0.05765		1	BovineHD0100017600	2	1	REC	0/14	64/207	0.04487
1	Hapmap51585-BTA-32601	61517865	1	0.2143	0.2546	2	0.8239	0.7984		1	Hapmap51585-BTA-32601	1	2	DOM	6/8	125/146	1		1	Hapmap51585-BTA-32601	1	2	REC	0/14	13/258	1
1	BTA-103663-no-rs	61538142	2	0	0.07565	1	0.2509	0		1	BTA-103663-no-rs	2	1	DOM	0/14	39/232	0.2292		1	BTA-103663-no-rs	2	1	REC	0/14	2/269	1
1	BovineHD0100017627	61555038	2	0.25	0.4296	1	0.07652	0.4425		1	BovineHD0100017627	2	1	DOM	7/7	182/88	0.2438		1	BovineHD0100017627	2	1	REC	0/14	50/220	0.1406
1	ARS-BFGL-NGS-40229	61583136	1	0.1429	0.3118	2	0.06024	0.3679		1	ARS-BFGL-NGS-40229	1	2	DOM	3/11	139/132	0.05144		1	ARS-BFGL-NGS-40229	1	2	REC	1/13	30/241	1
1	BovineHD0100017646	61605906	1	0.1429	0.2804	2	0.1308	0.4276		1	BovineHD0100017646	1	2	DOM	3/11	128/143	0.09602		1	BovineHD0100017646	1	2	REC	1/13	24/247	1
1	BovineHD0100017648	61618060	2	0.1429	0.3074	1	0.08827	0.3755		1	BovineHD0100017648	2	1	DOM	3/11	138/132	0.05148		1	BovineHD0100017648	2	1	REC	1/13	28/242	1
1	ARS-BFGL-NGS-101934	61629350	2	0.4286	0.1199	1	8.184e-05	5.504		1	ARS-BFGL-NGS-101934	2	1	DOM	12/2	62/209	2.63e-06		1	ARS-BFGL-NGS-101934	2	1	REC	0/14	3/268	1
1	BovineHD0100017650	61638069	2	0.25	0.4	1	0.1635	0.5		1	BovineHD0100017650	2	1	DOM	6/8	182/88	0.08025		1	BovineHD0100017650	2	1	REC	1/13	34/236	1
1	BovineHD0100017660	61697968	2	0.3214	0.4649	1	0.1736	0.5451		1	BovineHD0100017660	2	1	DOM	9/5	204/67	0.3539		1	BovineHD0100017660	2	1	REC	0/14	48/223	0.1374
1	Hapmap42400-BTA-102731	61741423	2	0.5357	0.4668	1	0.5616	1.318		1	Hapmap42400-BTA-102731	2	1	DOM	13/1	201/70	0.2011		1	Hapmap42400-BTA-102731	2	1	REC	2/12	52/219	1
1	BovineHD0100017684	61774550	1	0.4643	0.1494	2	0.0001347	4.933		1	BovineHD0100017684	1	2	DOM	13/1	76/195	1.464e-06		1	BovineHD0100017684	1	2	REC	0/14	5/266	1
1	ARS-BFGL-NGS-91410	61817159	2	0.4643	0.1439	1	9.349e-05	5.156		1	ARS-BFGL-NGS-91410	2	1	DOM	13/1	73/198	9.189e-07		1	ARS-BFGL-NGS-91410	2	1	REC	0/14	5/266	1
1	BovineHD0100017707	61897376	2	0.2143	0.2712	1	0.6628	0.7328		1	BovineHD0100017707	2	1	DOM	6/8	128/143	0.7907		1	BovineHD0100017707	2	1	REC	0/14	19/252	0.6091
1	BTB-01806856	62003821	1	0.1786	0.2675	2	0.3816	0.5952		1	BTB-01806856	1	2	DOM	5/9	127/144	0.5843		1	BTB-01806856	1	2	REC	0/14	18/253	1
1	BovineHD0100017729	62009095	2	0.2143	0.413	1	0.04685	0.3877		1	BovineHD0100017729	2	1	DOM	6/8	179/91	0.08742		1	BovineHD0100017729	2	1	REC	0/14	44/226	0.1374
1	BovineHD0100017746	62066946	1	0.03571	0.1661	2	0.06741	0.186		1	BovineHD0100017746	1	2	DOM	1/13	84/187	0.07202		1	BovineHD0100017746	1	2	REC	0/14	6/265	1
1	Hapmap39200-BTA-32607	62092465	1	0.7143	0.4631	2	0.01114	2.898		1	Hapmap39200-BTA-32607	1	2	DOM	14/0	195/76	0.02479		1	Hapmap39200-BTA-32607	1	2	REC	6/8	56/215	0.08776
1	Hapmap38640-BTA-92406	62137916	2	0.5357	0.4539	1	0.44	1.388		1	Hapmap38640-BTA-92406	2	1	DOM	12/2	193/78	0.3628		1	Hapmap38640-BTA-92406	2	1	REC	3/11	53/218	0.7421
1	BovineHD0100017773	62178500	1	0.3571	0.4463	2	0.4365	0.6893		1	BovineHD0100017773	1	2	DOM	10/4	192/78	1		1	BovineHD0100017773	1	2	REC	0/14	49/221	0.1388
1	BovineHD0100017775	62188650	1	0.5385	0.3614	2	0.0942	2.061		1	BovineHD0100017775	1	2	DOM	12/1	160/107	0.01926		1	BovineHD0100017775	1	2	REC	2/11	33/234	0.6697
1	BTB-00031464	62207514	1	0.2857	0.3063	2	1	0.906		1	BTB-00031464	1	2	DOM	7/7	147/124	0.7893		1	BTB-00031464	1	2	REC	1/13	19/252	1
1	BovineHD0100017788	62228314	2	0.2143	0.2546	1	0.8239	0.7984		1	BovineHD0100017788	2	1	DOM	5/9	125/146	0.585		1	BovineHD0100017788	2	1	REC	1/13	13/258	0.5143
1	BTB-00031535	62238398	2	0.1429	0.2085	1	0.4813	0.6327		1	BTB-00031535	2	1	DOM	4/10	100/171	0.7768		1	BTB-00031535	2	1	REC	0/14	13/258	1
1	BovineHD0100017797	62247467	2	0.2692	0.4093	1	0.2187	0.5318		1	BovineHD0100017797	2	1	DOM	7/6	178/92	0.3832		1	BovineHD0100017797	2	1	REC	0/13	43/227	0.229
1	ARS-BFGL-NGS-42248	62269764	2	0.2857	0.3192	1	0.8364	0.8532		1	ARS-BFGL-NGS-42248	2	1	DOM	8/6	149/122	1		1	ARS-BFGL-NGS-42248	2	1	REC	0/14	24/247	0.6164
1	BovineHD0100017803	62273759	1	0.3846	0.3704	2	1	1.062		1	BovineHD0100017803	1	2	DOM	10/3	164/106	0.3822		1	BovineHD0100017803	1	2	REC	0/13	36/234	0.3842
1	ARS-BFGL-NGS-102719	62305513	1	0.3929	0.3561	2	0.6902	1.17		1	ARS-BFGL-NGS-102719	1	2	DOM	9/5	159/112	0.7851		1	ARS-BFGL-NGS-102719	1	2	REC	2/12	34/237	0.6926
1	BovineHD0100017817	62327960	2	0.5357	0.3074	1	0.02013	2.6		1	BovineHD0100017817	2	1	DOM	12/2	139/131	0.01317		1	BovineHD0100017817	2	1	REC	3/11	27/243	0.1739
1	ARS-BFGL-NGS-115080	62364649	2	0.03571	0.05904	1	1	0.5903		1	ARS-BFGL-NGS-115080	2	1	DOM	1/13	32/239	1		1	ARS-BFGL-NGS-115080	2	1	REC	0/14	0/271	1
1	ARS-BFGL-NGS-114995	62394973	1	0.2143	0.2491	2	0.8238	0.8222		1	ARS-BFGL-NGS-114995	1	2	DOM	6/8	124/147	1		1	ARS-BFGL-NGS-114995	1	2	REC	0/14	11/260	1
1	ARS-BFGL-NGS-100977	62421587	2	0.25	0.3432	1	0.4134	0.638		1	ARS-BFGL-NGS-100977	2	1	DOM	7/7	152/119	0.7843		1	ARS-BFGL-NGS-100977	2	1	REC	0/14	34/237	0.3871
1	BovineHD0100017842	62445177	2	0.1429	0.09259	1	0.3277	1.633		1	BovineHD0100017842	2	1	DOM	4/10	49/221	0.3046		1	BovineHD0100017842	2	1	REC	0/14	1/269	1
1	BTB-01665387	62457515	1	0.2143	0.3653	2	0.111	0.4738		1	BTB-01665387	1	2	DOM	6/8	163/108	0.2653		1	BTB-01665387	1	2	REC	0/14	35/236	0.2303
1	BovineHD0100017851	62471598	1	0.1923	0.4481	2	0.01367	0.2932		1	BovineHD0100017851	1	2	DOM	5/8	189/81	0.02817		1	BovineHD0100017851	1	2	REC	0/13	53/217	0.137
1	BovineHD0100017855	62488432	1	0.1538	0.2045	2	0.6265	0.7074		1	BovineHD0100017855	1	2	DOM	4/9	100/169	0.7735		1	BovineHD0100017855	1	2	REC	0/13	10/259	1
1	BovineHD0100017856	62490666	1	0.1538	0.2045	2	0.6265	0.7074		1	BovineHD0100017856	1	2	DOM	4/9	100/169	0.7735		1	BovineHD0100017856	1	2	REC	0/13	10/259	1
1	ARS-BFGL-NGS-14335	62494500	1	0.1429	0.2066	2	0.6293	0.6399		1	ARS-BFGL-NGS-14335	1	2	DOM	4/10	101/170	0.5831		1	ARS-BFGL-NGS-14335	1	2	REC	0/14	11/260	1
1	BTB-01506507	62523255	2	0.25	0.3635	1	0.3119	0.5838		1	BTB-01506507	2	1	DOM	6/8	171/100	0.1596		1	BTB-01506507	2	1	REC	1/13	26/245	1
1	BovineHD0100017879	62560018	1	0.2143	0.1426	2	0.2773	1.64		1	BovineHD0100017879	1	2	DOM	5/9	71/199	0.5354		1	BovineHD0100017879	1	2	REC	1/13	6/264	0.3008
1	BTB-01285049	62594967	2	0.6071	0.2878	1	0.001044	3.824		1	BTB-01285049	2	1	DOM	13/1	134/137	0.001538		1	BTB-01285049	2	1	REC	4/10	22/249	0.02912
1	ARS-BFGL-NGS-112682	62631854	2	0.07143	0.19	1	0.1373	0.3279		1	ARS-BFGL-NGS-112682	2	1	DOM	2/12	90/181	0.239		1	ARS-BFGL-NGS-112682	2	1	REC	0/14	13/258	1
1	BTB-01285245	62673903	1	0.6071	0.4059	2	0.04785	2.262		1	BTB-01285245	1	2	DOM	14/0	174/97	0.003118		1	BTB-01285245	1	2	REC	3/11	46/225	0.7149
1	Hapmap60296-rs29016002	62715096	1	0.6154	0.4723	2	0.165	1.788		1	Hapmap60296-rs29016002	1	2	DOM	13/0	192/79	0.02261		1	Hapmap60296-rs29016002	1	2	REC	3/10	64/207	1
1	Hapmap49510-BTA-17452	62768510	1	0.5357	0.2546	2	0.003365	3.378		1	Hapmap49510-BTA-17452	1	2	DOM	14/0	126/145	3.365e-05		1	Hapmap49510-BTA-17452	1	2	REC	1/13	12/259	0.488
1	ARS-BFGL-NGS-4583	62817866	1	0.3214	0.4576	2	0.1769	0.5615		1	ARS-BFGL-NGS-4583	1	2	DOM	8/6	195/76	0.2374		1	ARS-BFGL-NGS-4583	1	2	REC	1/13	53/218	0.4812
1	BTA-32633-no-rs	62841878	1	0.1429	0.1347	2	0.782	1.071		1	BTA-32633-no-rs	1	2	DOM	4/10	63/208	0.7463		1	BTA-32633-no-rs	1	2	REC	0/14	10/261	1
1	BovineHD0100017984	62855706	2	0.2857	0.4333	1	0.1693	0.5231		1	BovineHD0100017984	2	1	DOM	8/6	182/88	0.5609		1	BovineHD0100017984	2	1	REC	0/14	52/218	0.08081
1	BovineHD0100017999	62900770	2	0.4643	0.3481	1	0.2272	1.623		1	BovineHD0100017999	2	1	DOM	12/2	164/106	0.08812		1	BovineHD0100017999	2	1	REC	1/13	24/246	1
1	Hapmap24328-BTA-108938	62924157	2	0.2692	0.428	1	0.1535	0.4923		1	Hapmap24328-BTA-108938	2	1	DOM	7/6	189/82	0.2324		1	Hapmap24328-BTA-108938	2	1	REC	0/13	43/228	0.2288
1	BTA-108948-no-rs	62972124	1	0.07143	0.06089	2	0.6872	1.186		1	BTA-108948-no-rs	1	2	DOM	2/12	33/238	0.6847		1	BTA-108948-no-rs	1	2	REC	0/14	0/271	1
1	BTA-101821-no-rs	63032317	2	0.1071	0.2343	1	0.1642	0.3921		1	BTA-101821-no-rs	2	1	DOM	3/11	113/158	0.1681		1	BTA-101821-no-rs	2	1	REC	0/14	14/257	1
1	BovineHD0100018022	63041158	2	0.2857	0.3796	1	0.4238	0.6537		1	BovineHD0100018022	2	1	DOM	8/6	176/94	0.5727		1	BovineHD0100018022	2	1	REC	0/14	29/241	0.3745
1	ARS-BFGL-NGS-116361	63103154	1	0.1071	0.2343	2	0.1642	0.3921		1	ARS-BFGL-NGS-116361	1	2	DOM	3/11	113/158	0.1681		1	ARS-BFGL-NGS-116361	1	2	REC	0/14	14/257	1
1	Hapmap49061-BTA-122268	63139698	2	0.3929	0.5	1	0.3335	0.6471		1	Hapmap49061-BTA-122268	2	1	DOM	11/3	208/63	1		1	Hapmap49061-BTA-122268	2	1	REC	0/14	63/208	0.04497
1	BovineHD0100018044	63162754	2	0.5769	0.3611	1	0.03616	2.413		1	BovineHD0100018044	2	1	DOM	13/0	165/105	0.002509		1	BovineHD0100018044	2	1	REC	2/11	30/240	0.6472
1	ARS-BFGL-NGS-44433	63196236	1	0.6071	0.4594	2	0.1731	1.819		1	ARS-BFGL-NGS-44433	1	2	DOM	14/0	200/71	0.02466		1	ARS-BFGL-NGS-44433	1	2	REC	3/11	49/222	0.7253
1	Hapmap44333-BTA-104611	63222337	2	0.6071	0.3635	1	0.01487	2.707		1	Hapmap44333-BTA-104611	2	1	DOM	14/0	164/107	0.001344		1	Hapmap44333-BTA-104611	2	1	REC	3/11	33/238	0.3975
1	BovineHD0100018062	63256956	1	0.2857	0.4446	2	0.1188	0.4996		1	BovineHD0100018062	1	2	DOM	8/6	198/73	0.223		1	BovineHD0100018062	1	2	REC	0/14	43/228	0.139
1	ARS-BFGL-NGS-105436	63346740	1	0.25	0.3118	2	0.6751	0.7357		1	ARS-BFGL-NGS-105436	1	2	DOM	7/7	149/122	0.7868		1	ARS-BFGL-NGS-105436	1	2	REC	0/14	20/251	0.6087
1	ARS-BFGL-NGS-3132	63427104	2	0.1071	0.1181	1	1	0.8962		1	ARS-BFGL-NGS-3132	2	1	DOM	3/11	63/208	1		1	ARS-BFGL-NGS-3132	2	1	REC	0/14	1/270	1
1	BTB-00640138	63473042	2	0.3462	0.3395	1	1	1.03		1	BTB-00640138	2	1	DOM	8/5	156/115	1		1	BTB-00640138	2	1	REC	1/12	28/243	1
1	BTB-00639971	63540783	1	0.1071	0.1218	2	1	0.8655		1	BTB-00639971	1	2	DOM	3/11	62/209	1		1	BTB-00639971	1	2	REC	0/14	4/267	1
1	Hapmap31089-BTA-130737	63602126	1	0.07143	0.06089	2	0.6872	1.186		1	Hapmap31089-BTA-130737	1	2	DOM	2/12	32/239	0.677		1	Hapmap31089-BTA-130737	1	2	REC	0/14	1/270	1
1	BTB-01687859	63694804	2	0.1429	0.3856	1	0.008803	0.2656		1	BTB-01687859	2	1	DOM	4/10	172/99	0.01151		1	BTB-01687859	2	1	REC	0/14	37/234	0.2282
1	BovineHD0100018165	63716985	1	0.5417	0.2007	2	0.0003402	4.705		1	BovineHD0100018165	1	2	DOM	12/0	96/173	6.993e-06		1	BovineHD0100018165	1	2	REC	1/11	12/257	0.4402
1	BovineHD0100018178	63749969	2	0.5769	0.2519	1	0.0008685	4.051		1	BovineHD0100018178	2	1	DOM	13/0	123/147	5.336e-05		1	BovineHD0100018178	2	1	REC	2/11	13/257	0.1458
1	ARS-BFGL-NGS-27619	63879508	2	0.4643	0.2712	1	0.03204	2.329		1	ARS-BFGL-NGS-27619	2	1	DOM	12/2	130/141	0.006001		1	ARS-BFGL-NGS-27619	2	1	REC	1/13	17/254	0.6077
1	BovineHD0100018250	63914263	2	0.3077	0.4796	1	0.1077	0.4822		1	BovineHD0100018250	2	1	DOM	7/6	201/69	0.1133		1	BovineHD0100018250	2	1	REC	1/12	58/212	0.3143
1	BovineHD0100018262	63978104	2	0.1923	0.4033	1	0.03862	0.3522		1	BovineHD0100018262	2	1	DOM	5/8	182/87	0.03764		1	BovineHD0100018262	2	1	REC	0/13	35/234	0.3809
1	BovineHD0100018263	63981310	2	0.1923	0.4033	1	0.03862	0.3522		1	BovineHD0100018263	2	1	DOM	5/8	182/87	0.03764		1	BovineHD0100018263	2	1	REC	0/13	35/234	0.3809
1	BTB-00451094	64034192	1	0.1786	0.4059	2	0.01695	0.3182		1	BTB-00451094	1	2	DOM	5/9	184/87	0.01903		1	BTB-00451094	1	2	REC	0/14	36/235	0.2289
1	BovineHD0100018286	64041973	1	0.1154	0.2444	2	0.1608	0.4032		1	BovineHD0100018286	1	2	DOM	3/10	118/152	0.1635		1	BovineHD0100018286	1	2	REC	0/13	14/256	1
1	BTB-00033025	64072711	2	0.07143	0.1052	1	0.7573	0.6545		1	BTB-00033025	2	1	DOM	2/12	53/218	1		1	BTB-00033025	2	1	REC	0/14	4/267	1
1	ARS-BFGL-NGS-10860	64097352	2	0.25	0.238	1	0.8235	1.067		1	ARS-BFGL-NGS-10860	2	1	DOM	7/7	119/152	0.7843		1	ARS-BFGL-NGS-10860	2	1	REC	0/14	10/261	1
1	BovineHD0100018302	64119388	1	0.07692	0.2037	2	0.1346	0.3258		1	BovineHD0100018302	1	2	DOM	2/11	102/168	0.1421		1	BovineHD0100018302	1	2	REC	0/13	8/262	1
1	BovineHD0100018309	64142274	1	0.04167	0.1691	2	0.1535	0.2136		1	BovineHD0100018309	1	2	DOM	1/11	84/185	0.1147		1	BovineHD0100018309	1	2	REC	0/12	7/262	1
1	ARS-BFGL-NGS-71757	64171919	1	0.1786	0.3819	2	0.04292	0.3518		1	ARS-BFGL-NGS-71757	1	2	DOM	4/10	167/104	0.02224		1	ARS-BFGL-NGS-71757	1	2	REC	1/13	40/231	0.7006
1	BovineHD0100018320	64178623	1	0.04167	0.1903	2	0.1005	0.185		1	BovineHD0100018320	1	2	DOM	1/11	91/177	0.1116		1	BovineHD0100018320	1	2	REC	0/12	11/257	1
1	BTB-00033090	64193131	2	0.1071	0.2804	1	0.04942	0.3079		1	BTB-00033090	2	1	DOM	3/11	131/140	0.05741		1	BTB-00033090	2	1	REC	0/14	21/250	0.6093
1	BovineHD0100018326	64201222	2	0.1154	0.187	1	0.4467	0.5669		1	BovineHD0100018326	2	1	DOM	3/10	92/178	0.5536		1	BovineHD0100018326	2	1	REC	0/13	9/261	1
1	BTB-00033167	64268930	2	0.1071	0.19	1	0.3299	0.5115		1	BTB-00033167	2	1	DOM	3/11	94/177	0.3948		1	BTB-00033167	2	1	REC	0/14	9/262	1
1	BTB-00026837	64391625	2	0.2143	0.2915	1	0.521	0.6628		1	BTB-00026837	2	1	DOM	6/8	138/133	0.5948		1	BTB-00026837	2	1	REC	0/14	20/251	0.6087
1	BovineHD0100018387	64403989	1	0.6786	0.4389	2	0.01813	2.699		1	BovineHD0100018387	1	2	DOM	13/1	190/80	0.0759		1	BovineHD0100018387	1	2	REC	6/8	47/223	0.02862
1	ARS-BFGL-NGS-33635	64483369	2	0.2857	0.4465	1	0.1182	0.4959		1	ARS-BFGL-NGS-33635	2	1	DOM	7/7	191/80	0.1355		1	ARS-BFGL-NGS-33635	2	1	REC	1/13	51/220	0.4778
1	BTB-00027056	64527662	1	0.6429	0.4834	2	0.1214	1.924		1	BTB-00027056	1	2	DOM	14/0	196/75	0.02451		1	BTB-00027056	1	2	REC	4/10	66/205	0.752
1	BovineHD0100018415	64547926	1	0.3846	0.4704	2	0.4272	0.7037		1	BovineHD0100018415	1	2	DOM	9/4	191/79	1		1	BovineHD0100018415	1	2	REC	1/12	63/207	0.3098
1	BovineHD0100018416	64552297	1	0.2692	0.2778	2	1	0.9579		1	BovineHD0100018416	1	2	DOM	7/6	138/132	1		1	BovineHD0100018416	1	2	REC	0/13	12/258	1
1	BTA-15412-no-rs	64572534	2	0.03571	0.02768	1	0.5582	1.301		1	BTA-15412-no-rs	2	1	DOM	1/13	15/256	0.5633		1	BTA-15412-no-rs	2	1	REC	0/14	0/271	1
1	ARS-BFGL-NGS-112600	64627775	2	0.6429	0.4779	1	0.1198	1.967		1	ARS-BFGL-NGS-112600	2	1	DOM	14/0	196/75	0.02451		1	ARS-BFGL-NGS-112600	2	1	REC	4/10	63/208	0.7463
1	BovineHD0100018434	64645261	2	0.3929	0.4424	1	0.698	0.8156		1	BovineHD0100018434	2	1	DOM	10/4	187/82	1		1	BovineHD0100018434	2	1	REC	1/13	51/218	0.4782
1	BTB-00027149	64679107	2	0.3571	0.476	1	0.248	0.6115		1	BTB-00027149	2	1	DOM	10/4	198/73	1		1	BTB-00027149	2	1	REC	0/14	60/211	0.0466
1	BTB-00027201	64736792	2	0.3571	0.3948	1	0.8432	0.8515		1	BTB-00027201	2	1	DOM	10/4	175/96	0.7766		1	BTB-00027201	2	1	REC	0/14	39/232	0.2292
1	BovineHD0100018462	64769230	1	0.07692	0.1315	2	0.5592	0.5505		1	BovineHD0100018462	1	2	DOM	2/11	65/205	0.7395		1	BovineHD0100018462	1	2	REC	0/13	6/264	1
1	BovineHD0100018473	64823955	1	0.3571	0.4015	2	0.6965	0.8282		1	BovineHD0100018473	1	2	DOM	10/4	177/92	0.7785		1	BovineHD0100018473	1	2	REC	0/14	39/230	0.2294
1	BTB-00027298	64831957	2	0.07143	0.131	1	0.5612	0.5103		1	BTB-00027298	2	1	DOM	2/12	65/206	0.5316		1	BTB-00027298	2	1	REC	0/14	6/265	1
1	BTB-00027332	64864876	2	0.07143	0.1273	1	0.5601	0.5273		1	BTB-00027332	2	1	DOM	2/12	63/208	0.7436		1	BTB-00027332	2	1	REC	0/14	6/265	1
1	BTB-00027405	64893868	2	0.03571	0.0572	1	1	0.6105		1	BTB-00027405	2	1	DOM	1/13	31/240	1		1	BTB-00027405	2	1	REC	0/14	0/271	1
1	Hapmap42852-BTA-15416	64920298	1	0.03571	0.0572	2	1	0.6105		1	Hapmap42852-BTA-15416	1	2	DOM	1/13	31/240	1		1	Hapmap42852-BTA-15416	1	2	REC	0/14	0/271	1
1	BovineHD0100018503	64935538	2	0.3571	0.4	1	0.6972	0.8333		1	BovineHD0100018503	2	1	DOM	10/4	177/93	0.7779		1	BovineHD0100018503	2	1	REC	0/14	39/231	0.2293
1	Hapmap32539-BTA-124026	64978225	1	0.03571	0.0572	2	1	0.6105		1	Hapmap32539-BTA-124026	1	2	DOM	1/13	31/240	1		1	Hapmap32539-BTA-124026	1	2	REC	0/14	0/271	1
1	Hapmap55251-rs29014781	65022321	1	0.2143	0.3893	2	0.07302	0.4278		1	Hapmap55251-rs29014781	1	2	DOM	6/8	175/96	0.1518		1	Hapmap55251-rs29014781	1	2	REC	0/14	36/235	0.2289
1	BovineHD0100018526	65041833	1	0.08333	0.1059	2	1	0.7671		1	BovineHD0100018526	1	2	DOM	2/10	56/213	1		1	BovineHD0100018526	1	2	REC	0/12	1/268	1
1	BTA-15421-no-rs	65061689	1	0.2143	0.387	2	0.0737	0.4319		1	BTA-15421-no-rs	1	2	DOM	6/8	174/96	0.1523		1	BTA-15421-no-rs	1	2	REC	0/14	35/235	0.23
1	BovineHD0100018538	65090781	1	0.1667	0.2602	2	0.4726	0.5686		1	BovineHD0100018538	1	2	DOM	4/8	125/144	0.5557		1	BovineHD0100018538	1	2	REC	0/12	15/254	1
1	BovineHD0100018540	65098749	2	0.2308	0.3907	1	0.1469	0.4678		1	BovineHD0100018540	2	1	DOM	6/7	175/95	0.2359		1	BovineHD0100018540	2	1	REC	0/13	36/234	0.3842
1	BovineHD0100018544	65119095	2	0.2308	0.3885	1	0.1468	0.4722		1	BovineHD0100018544	2	1	DOM	6/7	174/95	0.2366		1	BovineHD0100018544	2	1	REC	0/13	35/234	0.3809
1	BTB-00027516	65165222	1	0.03571	0.1587	2	0.1028	0.1964		1	BTB-00027516	1	2	DOM	1/13	81/190	0.07492		1	BTB-00027516	1	2	REC	0/14	5/266	1
1	BovineHD0100018558	65173401	2	0.25	0.4315	1	0.07626	0.4392		1	BovineHD0100018558	2	1	DOM	7/7	192/78	0.131		1	BovineHD0100018558	2	1	REC	0/14	41/229	0.2333
1	ARS-BFGL-NGS-61496	65216449	1	0.07692	0.1926	2	0.1974	0.3494		1	ARS-BFGL-NGS-61496	1	2	DOM	2/11	90/180	0.2338		1	ARS-BFGL-NGS-61496	1	2	REC	0/13	14/256	1
1	ARS-BFGL-NGS-83021	65333436	2	0.6429	0.4613	1	0.07951	2.102		1	ARS-BFGL-NGS-83021	2	1	DOM	14/0	192/79	0.0131		1	ARS-BFGL-NGS-83021	2	1	REC	4/10	58/213	0.513
1	BovineHD0100018613	65366689	2	0.5357	0.25	1	0.001714	3.462		1	BovineHD0100018613	2	1	DOM	14/0	121/149	2.073e-05		1	BovineHD0100018613	2	1	REC	1/13	14/256	0.5407
1	BTB-02069463	65413028	2	0.5	0.3524	1	0.1559	1.838		1	BTB-02069463	2	1	DOM	13/1	158/113	0.01014		1	BTB-02069463	2	1	REC	1/13	33/238	1
1	ARS-BFGL-NGS-3996	65517170	2	0.3571	0.4576	1	0.3351	0.6586		1	ARS-BFGL-NGS-3996	2	1	DOM	10/4	193/78	1		1	ARS-BFGL-NGS-3996	2	1	REC	0/14	55/216	0.07952
1	ARS-BFGL-NGS-115763	65535489	1	0.4286	0.5	2	0.562	0.75		1	ARS-BFGL-NGS-115763	1	2	DOM	11/3	207/64	1		1	ARS-BFGL-NGS-115763	1	2	REC	1/13	64/207	0.2024
1	ARS-BFGL-NGS-43799	65583709	2	0.1429	0.3413	1	0.03766	0.3216		1	ARS-BFGL-NGS-43799	2	1	DOM	4/10	154/117	0.05223		1	ARS-BFGL-NGS-43799	2	1	REC	0/14	31/240	0.377
1	Hapmap40403-BTA-15429	65625274	1	0.4286	0.4742	2	0.7006	0.8317		1	Hapmap40403-BTA-15429	1	2	DOM	10/4	195/76	1		1	Hapmap40403-BTA-15429	1	2	REC	2/12	62/209	0.7426
1	ARS-BFGL-BAC-19439	65647815	2	0.03571	0.04244	1	1	0.8357		1	ARS-BFGL-BAC-19439	2	1	DOM	1/13	23/248	1		1	ARS-BFGL-BAC-19439	2	1	REC	0/14	0/271	1
1	ARS-BFGL-BAC-19440	65738282	1	0.03571	0.107	2	0.344	0.3091		1	ARS-BFGL-BAC-19440	1	2	DOM	1/13	57/214	0.3142		1	ARS-BFGL-BAC-19440	1	2	REC	0/14	1/270	1
1	BTB-00027638	65763047	1	0.5714	0.4631	2	0.332	1.546		1	BTB-00027638	1	2	DOM	12/2	188/83	0.243		1	BTB-00027638	1	2	REC	4/10	63/208	0.7463
1	ARS-BFGL-NGS-111569	65792796	1	0.1786	0.4151	2	0.01634	0.3063		1	ARS-BFGL-NGS-111569	1	2	DOM	5/9	178/93	0.04101		1	ARS-BFGL-NGS-111569	1	2	REC	0/14	47/224	0.1367
1	BovineHD0100018708	65801483	2	0.75	0.466	1	0.003494	3.437		1	BovineHD0100018708	2	1	DOM	14/0	199/66	0.04599		1	BovineHD0100018708	2	1	REC	7/7	48/217	0.008892
1	BovineHD0100018723	65838513	2	0.1786	0.4151	1	0.01634	0.3063		1	BovineHD0100018723	2	1	DOM	5/9	178/93	0.04101		1	BovineHD0100018723	2	1	REC	0/14	47/224	0.1367
1	BovineHD0100018775	65943436	2	0.6071	0.4185	1	0.0527	2.147		1	BovineHD0100018775	2	1	DOM	14/0	186/84	0.01261		1	BovineHD0100018775	2	1	REC	3/11	40/230	0.4522
1	BovineHD0100018783	65952684	2	0.1429	0.3284	1	0.03937	0.3409		1	BovineHD0100018783	2	1	DOM	4/10	152/116	0.05255		1	BovineHD0100018783	2	1	REC	0/14	24/244	0.6173
1	BTA-33604-no-rs	66059883	1	0.6071	0.4188	2	0.07617	2.145		1	BTA-33604-no-rs	1	2	DOM	14/0	186/85	0.0127		1	BTA-33604-no-rs	1	2	REC	3/11	41/230	0.4601
1	ARS-BFGL-NGS-117561	66087781	2	0.5	0.3339	1	0.1002	1.994		1	ARS-BFGL-NGS-117561	2	1	DOM	13/1	153/118	0.009664		1	ARS-BFGL-NGS-117561	2	1	REC	1/13	28/243	1
1	BovineHD0100018849	66092451	1	0.1429	0.2463	2	0.2621	0.5101		1	BovineHD0100018849	1	2	DOM	4/10	111/157	0.4125		1	BovineHD0100018849	1	2	REC	0/14	21/247	0.6094
1	ARS-BFGL-NGS-14087	66112842	2	0.1071	0.06273	1	0.4161	1.793		1	ARS-BFGL-NGS-14087	2	1	DOM	3/11	33/238	0.3975		1	ARS-BFGL-NGS-14087	2	1	REC	0/14	1/270	1
1	BovineHD4100000370	66133173	1	0.1429	0.3513	2	0.02404	0.3078		1	BovineHD4100000370	1	2	DOM	4/10	157/112	0.04897		1	BovineHD4100000370	1	2	REC	0/14	32/237	0.3802
1	Hapmap54041-ss46526276	66150690	1	0.6071	0.3948	2	0.03016	2.369		1	Hapmap54041-ss46526276	1	2	DOM	14/0	176/95	0.006157		1	Hapmap54041-ss46526276	1	2	REC	3/11	38/233	0.4334
1	BovineHD0100018869	66184432	1	0.6071	0.3289	2	0.003779	3.153		1	BovineHD0100018869	1	2	DOM	14/0	154/109	0.001103		1	BovineHD0100018869	1	2	REC	3/11	19/244	0.08918
1	ARS-BFGL-NGS-36705	66188904	2	0.03571	0.1771	1	0.06691	0.1721		1	ARS-BFGL-NGS-36705	2	1	DOM	1/13	86/185	0.07129		1	ARS-BFGL-NGS-36705	2	1	REC	0/14	10/261	1
1	BovineHD0100018875	66211180	2	0.3571	0.4871	1	0.2442	0.585		1	BovineHD0100018875	2	1	DOM	10/4	208/63	0.7463		1	BovineHD0100018875	2	1	REC	0/14	56/215	0.07971
1	Hapmap51211-BTA-33586	66258464	2	0.07143	0.03321	1	0.2571	2.239		1	Hapmap51211-BTA-33586	2	1	DOM	2/12	18/253	0.2565		1	Hapmap51211-BTA-33586	2	1	REC	0/14	0/271	1
1	BovineHD0100018903	66364954	2	0	0.1089	1	0.1017	0		1	BovineHD0100018903	2	1	DOM	0/14	57/214	0.08023		1	BovineHD0100018903	2	1	REC	0/14	2/269	1
1	BovineHD0100018914	66441391	2	0.1429	0.2159	1	0.4793	0.6054		1	BovineHD0100018914	2	1	DOM	4/10	104/167	0.5784		1	BovineHD0100018914	2	1	REC	0/14	13/258	1
1	ARS-BFGL-NGS-103348	66454562	2	0.07143	0.02399	1	0.1647	3.13		1	ARS-BFGL-NGS-103348	2	1	DOM	2/12	13/258	0.1631		1	ARS-BFGL-NGS-103348	2	1	REC	0/14	0/271	1
1	BTB-00032648	66515809	1	0.1071	0.19	2	0.3299	0.5115		1	BTB-00032648	1	2	DOM	3/11	95/176	0.3934		1	BTB-00032648	1	2	REC	0/14	8/263	1
1	BovineHD0100018938	66539914	1	0.5357	0.441	2	0.3368	1.463		1	BovineHD0100018938	1	2	DOM	12/2	182/89	0.2384		1	BovineHD0100018938	1	2	REC	3/11	57/214	1
1	BTB-00033186	66560130	2	0.4643	0.4834	1	1	0.9262		1	BTB-00033186	2	1	DOM	11/3	197/74	0.7654		1	BTB-00033186	2	1	REC	2/12	65/206	0.5316
1	ARS-BFGL-NGS-4572	66612166	1	0.5714	0.4539	2	0.2473	1.604		1	ARS-BFGL-NGS-4572	1	2	DOM	12/2	193/78	0.3628		1	ARS-BFGL-NGS-4572	1	2	REC	4/10	53/218	0.49
1	BTB-00032574	66657113	2	0	0.08118	1	0.1555	0		1	BTB-00032574	2	1	DOM	0/14	44/227	0.1376		1	BTB-00032574	2	1	REC	0/14	0/271	1
1	ARS-BFGL-NGS-6075	66686171	2	0.1786	0.321	1	0.1441	0.4598		1	ARS-BFGL-NGS-6075	2	1	DOM	5/9	153/118	0.1691		1	ARS-BFGL-NGS-6075	2	1	REC	0/14	21/250	0.6093
1	BTB-00026096	66710186	1	0.1786	0.3524	2	0.06699	0.3995		1	BTB-00026096	1	2	DOM	5/9	163/108	0.09408		1	BTB-00026096	1	2	REC	0/14	28/243	0.3747
1	BTB-00026110	66731706	2	0.07143	0.07934	1	1	0.8927		1	BTB-00026110	2	1	DOM	2/12	41/230	1		1	BTB-00026110	2	1	REC	0/14	2/269	1
1	BTA-31636-no-rs	66799487	2	0.7143	0.3782	1	0.0005632	4.11		1	BTA-31636-no-rs	2	1	DOM	14/0	171/100	0.00283		1	BTA-31636-no-rs	2	1	REC	6/8	34/237	0.006745
1	BTA-05186-no-rs	66862192	2	0.5	0.2066	1	0.0007942	3.839		1	BTA-05186-no-rs	2	1	DOM	14/0	103/168	2.377e-06		1	BTA-05186-no-rs	2	1	REC	0/14	9/262	1
1	BTB-00028704	66890930	2	0.5	0.1531	1	3.631e-05	5.53		1	BTB-00028704	2	1	DOM	14/0	77/194	5.523e-08		1	BTB-00028704	2	1	REC	0/14	6/265	1
1	BovineHD0100019073	67069288	1	0.1429	0.1089	2	0.5365	1.364		1	BovineHD0100019073	1	2	DOM	4/10	55/216	0.4981		1	BovineHD0100019073	1	2	REC	0/14	4/267	1
1	UA-IFASA-7116	67101935	2	0.07143	0.1144	1	0.7582	0.5955		1	UA-IFASA-7116	2	1	DOM	2/12	59/212	0.7412		1	UA-IFASA-7116	2	1	REC	0/14	3/268	1
1	BTB-00032205	67133845	1	0.1429	0.1365	2	1	1.054		1	BTB-00032205	1	2	DOM	4/10	70/201	0.7623		1	BTB-00032205	1	2	REC	0/14	4/267	1
1	BTB-00032200	67163792	2	0.3214	0.2897	1	0.676	1.162		1	BTB-00032200	2	1	DOM	7/7	139/132	1		1	BTB-00032200	2	1	REC	2/12	18/253	0.2565
1	BTB-00032163	67192418	1	0.6071	0.4207	2	0.07635	2.128		1	BTB-00032163	1	2	DOM	12/2	179/92	0.1543		1	BTB-00032163	1	2	REC	5/9	49/222	0.1517
1	BTB-00032153	67213671	1	0.1071	0.1808	2	0.4482	0.5437		1	BTB-00032153	1	2	DOM	3/11	90/181	0.5598		1	BTB-00032153	1	2	REC	0/14	8/263	1
1	BovineHD0100019121	67264350	2	0.3571	0.3396	1	0.8401	1.081		1	BovineHD0100019121	2	1	DOM	8/6	155/113	1		1	BovineHD0100019121	2	1	REC	2/12	27/241	0.6436
1	Hapmap58284-rs29018937	67284880	1	0.5357	0.3801	2	0.1131	1.882		1	Hapmap58284-rs29018937	1	2	DOM	12/2	164/107	0.08799		1	Hapmap58284-rs29018937	1	2	REC	3/11	42/229	0.4697
1	BTA-33571-no-rs	67309126	1	0.1071	0.1808	2	0.4482	0.5437		1	BTA-33571-no-rs	1	2	DOM	3/11	90/181	0.5598		1	BTA-33571-no-rs	1	2	REC	0/14	8/263	1
1	BovineHD0100019150	67330069	2	0.4286	0.4871	1	0.5675	0.7898		1	BovineHD0100019150	2	1	DOM	10/4	210/61	0.5309		1	BovineHD0100019150	2	1	REC	2/12	54/217	1
1	ARS-BFGL-NGS-119133	67369224	1	0.1071	0.2528	2	0.1126	0.3547		1	ARS-BFGL-NGS-119133	1	2	DOM	3/11	124/147	0.09856		1	ARS-BFGL-NGS-119133	1	2	REC	0/14	13/258	1
1	Hapmap41826-BTA-31654	67423265	2	0.3214	0.4576	1	0.1769	0.5615		1	Hapmap41826-BTA-31654	2	1	DOM	8/6	193/78	0.3658		1	Hapmap41826-BTA-31654	2	1	REC	1/13	55/216	0.3166
1	BovineHD0100019190	67444738	1	0.1429	0.1343	2	0.7815	1.074		1	BovineHD0100019190	1	2	DOM	3/11	71/197	1		1	BovineHD0100019190	1	2	REC	1/13	1/267	0.09699
1	ARS-BFGL-NGS-117312	67466120	1	0.6429	0.4705	2	0.08307	2.026		1	ARS-BFGL-NGS-117312	1	2	DOM	13/1	206/65	0.201		1	ARS-BFGL-NGS-117312	1	2	REC	5/9	49/222	0.1517
1	BovineHD0100019214	67502529	1	0.5	0.3616	2	0.1607	1.765		1	BovineHD0100019214	1	2	DOM	14/0	168/103	0.002713		1	BovineHD0100019214	1	2	REC	0/14	28/243	0.3747
1	Hapmap59754-rs29024892	67577109	2	0.25	0.3856	1	0.1669	0.5311		1	Hapmap59754-rs29024892	2	1	DOM	7/7	173/98	0.3946		1	Hapmap59754-rs29024892	2	1	REC	0/14	36/235	0.2289
1	ARS-BFGL-NGS-7521	67672926	1	0.3214	0.4299	2	0.3279	0.6282		1	ARS-BFGL-NGS-7521	1	2	DOM	9/5	186/85	0.7711		1	ARS-BFGL-NGS-7521	1	2	REC	0/14	47/224	0.1367
1	ARS-BFGL-NGS-4503	67711822	2	0.5714	0.4649	1	0.3326	1.534		1	ARS-BFGL-NGS-4503	2	1	DOM	14/0	197/74	0.02435		1	ARS-BFGL-NGS-4503	2	1	REC	2/12	55/216	0.7433
1	BovineHD0100019327	67798278	1	0.5714	0.2668	2	0.000998	3.664		1	BovineHD0100019327	1	2	DOM	14/0	126/142	3.917e-05		1	BovineHD0100019327	1	2	REC	2/12	17/251	0.2412
1	Hapmap46988-BTA-34591	67805608	1	0.1429	0.1347	2	0.782	1.071		1	Hapmap46988-BTA-34591	1	2	DOM	4/10	67/204	0.7543		1	Hapmap46988-BTA-34591	1	2	REC	0/14	6/265	1
1	ARS-BFGL-NGS-111491	67859165	2	0.3214	0.3635	1	0.8405	0.8295		1	ARS-BFGL-NGS-111491	2	1	DOM	9/5	164/107	1		1	ARS-BFGL-NGS-111491	2	1	REC	0/14	33/238	0.383
1	Hapmap50666-BTA-34589	67935062	2	0.3214	0.3635	1	0.8405	0.8295		1	Hapmap50666-BTA-34589	2	1	DOM	9/5	164/107	1		1	Hapmap50666-BTA-34589	2	1	REC	0/14	33/238	0.383
1	Hapmap39647-BTA-34584	68006692	2	0.1429	0.1365	1	1	1.054		1	Hapmap39647-BTA-34584	2	1	DOM	4/10	67/204	0.7543		1	Hapmap39647-BTA-34584	2	1	REC	0/14	7/264	1
1	BovineHD0100019390	68014145	2	0.2143	0.5056	1	0.003081	0.2667		1	BovineHD0100019390	2	1	DOM	6/8	202/68	0.01356		1	BovineHD0100019390	2	1	REC	0/14	71/199	0.02458
1	BovineHD0100019406	68043046	2	0.03571	0.07463	1	0.7122	0.4593		1	BovineHD0100019406	2	1	DOM	1/13	40/228	0.7007		1	BovineHD0100019406	2	1	REC	0/14	0/268	1
1	BovineHD0100019431	68110104	2	0.1071	0.04244	1	0.1292	2.708		1	BovineHD0100019431	2	1	DOM	3/11	22/249	0.1136		1	BovineHD0100019431	2	1	REC	0/14	1/270	1
1	BovineHD0100019449	68187404	1	0.6429	0.3526	2	0.003958	3.305		1	BovineHD0100019449	1	2	DOM	13/1	149/119	0.004992		1	BovineHD0100019449	1	2	REC	5/9	40/228	0.05413
1	BovineHD0100019456	68229277	2	0.6786	0.4373	1	0.01799	2.717		1	BovineHD0100019456	2	1	DOM	13/1	180/91	0.04166		1	BovineHD0100019456	2	1	REC	6/8	57/214	0.09022
1	BovineHD0100019464	68248079	1	0.3077	0.2729	2	0.6588	1.184		1	BovineHD0100019464	1	2	DOM	8/5	118/144	0.2677		1	BovineHD0100019464	1	2	REC	0/13	25/237	0.6159
1	BovineHD0100019472	68267076	1	0.3571	0.4422	2	0.4378	0.7009		1	BovineHD0100019472	1	2	DOM	9/5	188/80	0.7657		1	BovineHD0100019472	1	2	REC	1/13	49/219	0.4765
1	ARS-BFGL-NGS-31379	68286354	1	0.3571	0.4613	2	0.3331	0.6489		1	ARS-BFGL-NGS-31379	1	2	DOM	9/5	196/75	0.546		1	ARS-BFGL-NGS-31379	1	2	REC	1/13	54/217	0.3186
1	BovineHD0100019485	68293671	2	0	0.01908	1	1	0		1	BovineHD0100019485	2	1	DOM	0/13	10/252	1		1	BovineHD0100019485	2	1	REC	0/13	0/262	1
1	BovineHD0100019488	68304713	1	0.3571	0.4557	2	0.3363	0.6635		1	BovineHD0100019488	1	2	DOM	9/5	193/78	0.5577		1	BovineHD0100019488	1	2	REC	1/13	54/217	0.3186
1	ARS-BFGL-NGS-26771	68417680	1	0.3214	0.3376	2	1	0.9292		1	ARS-BFGL-NGS-26771	1	2	DOM	8/6	151/120	1		1	ARS-BFGL-NGS-26771	1	2	REC	1/13	32/239	1
1	ARS-BFGL-NGS-100745	68440795	2	0.4286	0.441	1	1	0.9508		1	ARS-BFGL-NGS-100745	2	1	DOM	9/5	184/87	0.7748		1	ARS-BFGL-NGS-100745	2	1	REC	3/11	55/216	1
1	BTA-120514-no-rs	68465551	2	0.25	0.1624	1	0.2936	1.72		1	BTA-120514-no-rs	2	1	DOM	6/8	81/190	0.3724		1	BTA-120514-no-rs	2	1	REC	1/13	7/264	0.3351
1	BovineHD0100019566	68492520	2	0.5	0.4945	1	1	1.022		1	BovineHD0100019566	2	1	DOM	11/3	200/71	1		1	BovineHD0100019566	2	1	REC	3/11	68/203	1
1	Hapmap54911-rs29023069	68532921	1	0.4643	0.4982	2	0.8469	0.8731		1	Hapmap54911-rs29023069	1	2	DOM	10/4	201/70	0.7623		1	Hapmap54911-rs29023069	1	2	REC	3/11	69/202	1
1	BovineHD0100019589	68572324	1	0.2143	0.3081	2	0.3995	0.6124		1	BovineHD0100019589	1	2	DOM	6/8	141/130	0.5889		1	BovineHD0100019589	1	2	REC	0/14	26/245	0.6249
1	ARS-BFGL-NGS-118460	68596030	2	0.1071	0.1421	1	0.7838	0.7247		1	ARS-BFGL-NGS-118460	2	1	DOM	3/11	74/197	0.7654		1	ARS-BFGL-NGS-118460	2	1	REC	0/14	3/268	1
1	ARS-BFGL-NGS-118306	68623214	1	0.2143	0.3118	2	0.4003	0.6019		1	ARS-BFGL-NGS-118306	1	2	DOM	6/8	143/128	0.5862		1	ARS-BFGL-NGS-118306	1	2	REC	0/14	26/245	0.6249
1	ARS-BFGL-NGS-114985	68682461	1	0.2857	0.4096	2	0.2376	0.5766		1	ARS-BFGL-NGS-114985	1	2	DOM	8/6	178/93	0.5691		1	ARS-BFGL-NGS-114985	1	2	REC	0/14	44/227	0.1376
1	BovineHD0100019679	68712546	2	0.6071	0.3967	1	0.03081	2.351		1	BovineHD0100019679	2	1	DOM	13/1	175/96	0.03941		1	BovineHD0100019679	2	1	REC	4/10	40/231	0.2434
1	BTA-104027-no-rs	68757940	1	0.1786	0.1015	2	0.2019	1.925		1	BTA-104027-no-rs	1	2	DOM	5/9	51/220	0.1601		1	BTA-104027-no-rs	1	2	REC	0/14	4/267	1
1	BovineHD0100019701	68778928	2	0.1154	0.1455	1	1	0.7659		1	BovineHD0100019701	2	1	DOM	2/11	70/198	0.5259		1	BovineHD0100019701	2	1	REC	1/12	8/260	0.3512
1	ARS-BFGL-NGS-115898	68784544	2	0.2857	0.5092	1	0.03134	0.3855		1	ARS-BFGL-NGS-115898	2	1	DOM	8/6	208/63	0.1114		1	ARS-BFGL-NGS-115898	2	1	REC	0/14	68/203	0.02613
1	BovineHD0100019706	68792344	2	0	0.02037	1	1	0		1	BovineHD0100019706	2	1	DOM	0/13	11/259	1		1	BovineHD0100019706	2	1	REC	0/13	0/270	1
1	BovineHD0100019715	68801039	1	0.2857	0.1421	2	0.05254	2.416		1	BovineHD0100019715	1	2	DOM	8/6	69/202	0.0252		1	BovineHD0100019715	1	2	REC	0/14	8/263	1
1	AX-18260553	68863963	1	0.3929	0.2454	2	0.1152	1.99		1	AX-18260553	1	2	DOM	9/5	116/155	0.1661		1	AX-18260553	1	2	REC	2/12	17/254	0.2374
1	Hapmap38055-BTA-120751	68873131	2	0.1071	0.1255	1	1	0.8365		1	Hapmap38055-BTA-120751	2	1	DOM	3/11	65/206	1		1	Hapmap38055-BTA-120751	2	1	REC	0/14	3/268	1
1	BovineHD0100019760	68874880	1	0.375	0.2407	2	0.148	1.893		1	BovineHD0100019760	1	2	DOM	7/5	113/155	0.3725		1	BovineHD0100019760	1	2	REC	2/10	16/252	0.1756
1	BovineHD0100019784	68908189	1	0.3571	0.2306	2	0.1682	1.853		1	BovineHD0100019784	1	2	DOM	8/6	110/161	0.2695		1	BovineHD0100019784	1	2	REC	2/12	15/256	0.1997
1	BovineHD0100019804	68949628	2	0.03846	0.08889	1	0.7171	0.41		1	BovineHD0100019804	2	1	DOM	1/12	47/223	0.7033		1	BovineHD0100019804	2	1	REC	0/13	1/269	1
1	BovineHD0100019809	68970032	2	0.1429	0.1963	1	0.6272	0.6824		1	BovineHD0100019809	2	1	DOM	4/10	96/174	0.7764		1	BovineHD0100019809	2	1	REC	0/14	10/260	1
1	BovineHD0100019833	69009235	1	0	0.02952	2	1	0		1	BovineHD0100019833	1	2	DOM	0/14	15/256	1		1	BovineHD0100019833	1	2	REC	0/14	1/270	1
1	BovineHD0100019834	69009734	1	0	0.03731	2	1	0		1	BovineHD0100019834	1	2	DOM	0/12	20/248	1		1	BovineHD0100019834	1	2	REC	0/12	0/268	1
1	BovineHD0100019837	69012232	2	0	0.02399	1	1	0		1	BovineHD0100019837	2	1	DOM	0/14	13/258	1		1	BovineHD0100019837	2	1	REC	0/14	0/271	1
1	BTA-33563-no-rs	69016673	2	0.5	0.4299	1	0.5583	1.326		1	BTA-33563-no-rs	2	1	DOM	12/2	190/81	0.3644		1	BTA-33563-no-rs	2	1	REC	2/12	43/228	1
1	BovineHD0100019855	69033809	2	0	0.02052	1	1	0		1	BovineHD0100019855	2	1	DOM	0/12	11/257	1		1	BovineHD0100019855	2	1	REC	0/12	0/268	1
1	ARS-USDA-AGIL-chr1-69652189-000148	69047241	1	0	0.0203	2	1	0		1	ARS-USDA-AGIL-chr1-69652189-000148	1	2	DOM	0/13	11/260	1		1	ARS-USDA-AGIL-chr1-69652189-000148	1	2	REC	0/13	0/271	1
1	BovineHD0100019878	69055817	2	0	0.0203	1	1	0		1	BovineHD0100019878	2	1	DOM	0/14	11/260	1		1	BovineHD0100019878	2	1	REC	0/14	0/271	1
1	Hapmap59820-rs29019798	69085458	2	0.4286	0.4262	1	1	1.01		1	Hapmap59820-rs29019798	2	1	DOM	11/3	179/92	0.3987		1	Hapmap59820-rs29019798	2	1	REC	1/13	52/219	0.4793
1	BovineHD0100019911	69102381	2	0	0.02222	1	1	0		1	BovineHD0100019911	2	1	DOM	0/13	12/258	1		1	BovineHD0100019911	2	1	REC	0/13	0/270	1
1	BovineHD0100019936	69152362	1	0.125	0.1287	2	1	0.9669		1	BovineHD0100019936	1	2	DOM	3/9	66/202	1		1	BovineHD0100019936	1	2	REC	0/12	3/265	1
1	BovineHD0100019980	69234197	2	0.1154	0.2601	1	0.1101	0.371		1	BovineHD0100019980	2	1	DOM	3/10	123/148	0.1549		1	BovineHD0100019980	2	1	REC	0/13	18/253	1
1	ARS-BFGL-NGS-62687	69262270	2	0.25	0.4244	1	0.07789	0.4522		1	ARS-BFGL-NGS-62687	2	1	DOM	7/7	178/93	0.2575		1	ARS-BFGL-NGS-62687	2	1	REC	0/14	52/219	0.08102
1	BovineHD0100019998	69266076	2	0.5357	0.4649	1	0.5612	1.328		1	BovineHD0100019998	2	1	DOM	12/2	186/85	0.2399		1	BovineHD0100019998	2	1	REC	3/11	66/205	1
1	BovineHD0100020014	69294780	2	0.375	0.2761	1	0.3519	1.573		1	BovineHD0100020014	2	1	DOM	7/5	129/139	0.5635		1	BovineHD0100020014	2	1	REC	2/10	19/249	0.2243
1	ARS-BFGL-NGS-111716	69299662	1	0.2857	0.4373	2	0.1223	0.5148		1	ARS-BFGL-NGS-111716	1	2	DOM	8/6	181/90	0.5631		1	ARS-BFGL-NGS-111716	1	2	REC	0/14	56/215	0.07971
1	BovineHD0100020025	69320032	1	0.3571	0.3463	2	1	1.049		1	BovineHD0100020025	1	2	DOM	8/6	156/114	1		1	BovineHD0100020025	1	2	REC	2/12	31/239	0.6703
1	BovineHD0100020044	69372317	2	0.1786	0.3432	1	0.09881	0.4161		1	BovineHD0100020044	2	1	DOM	5/9	153/118	0.1691		1	BovineHD0100020044	2	1	REC	0/14	33/238	0.383
1	BovineHD0100020072	69488001	2	0.4286	0.3284	1	0.3055	1.534		1	BovineHD0100020072	2	1	DOM	9/5	150/121	0.5897		1	BovineHD0100020072	2	1	REC	3/11	28/243	0.1855
1	BovineHD0100020089	69551363	1	0.03571	0.04613	2	1	0.7659		1	BovineHD0100020089	1	2	DOM	1/13	24/247	1		1	BovineHD0100020089	1	2	REC	0/14	1/270	1
1	ARS-BFGL-NGS-111271	69554315	2	0.3571	0.2675	1	0.2851	1.521		1	ARS-BFGL-NGS-111271	2	1	DOM	8/6	130/141	0.5889		1	ARS-BFGL-NGS-111271	2	1	REC	2/12	15/256	0.1997
1	BovineHD0100020090	69554797	1	0.2143	0.3717	2	0.1082	0.4609		1	BovineHD0100020090	1	2	DOM	6/8	161/108	0.2668		1	BovineHD0100020090	1	2	REC	0/14	39/230	0.2294
1	ARS-BFGL-NGS-111283	69585403	1	0.4643	0.4077	2	0.5605	1.259		1	ARS-BFGL-NGS-111283	1	2	DOM	11/3	183/88	0.5593		1	ARS-BFGL-NGS-111283	1	2	REC	2/12	38/233	1
1	BovineHD0100020110	69613858	2	0.4286	0.3593	1	0.5458	1.338		1	BovineHD0100020110	2	1	DOM	11/3	165/105	0.2621		1	BovineHD0100020110	2	1	REC	1/13	29/241	1
1	BovineHD0100020122	69664149	2	0.2143	0.3444	1	0.2182	0.5191		1	BovineHD0100020122	2	1	DOM	6/8	160/110	0.2705		1	BovineHD0100020122	2	1	REC	0/14	26/244	0.6253
1	BovineHD0100020138	69748359	2	0.1786	0.2288	1	0.6481	0.7328		1	BovineHD0100020138	2	1	DOM	5/9	108/163	1		1	BovineHD0100020138	2	1	REC	0/14	16/255	1
1	ARS-BFGL-NGS-103803	69802244	2	0.5714	0.3967	1	0.07662	2.028		1	ARS-BFGL-NGS-103803	2	1	DOM	13/1	179/92	0.0409		1	ARS-BFGL-NGS-103803	2	1	REC	3/11	36/235	0.4175
1	BovineHD0100020162	69859758	1	0.4286	0.3	2	0.2054	1.75		1	BovineHD0100020162	1	2	DOM	10/4	141/129	0.1812		1	BovineHD0100020162	1	2	REC	2/12	21/249	0.3157
1	Hapmap41227-BTA-32644	69870271	2	0.4286	0.2509	1	0.04613	2.239		1	Hapmap41227-BTA-32644	2	1	DOM	10/4	119/152	0.05479		1	Hapmap41227-BTA-32644	2	1	REC	2/12	17/254	0.2374
1	BovineHD0100020179	69931914	1	0.6786	0.4154	2	0.009666	2.971		1	BovineHD0100020179	1	2	DOM	14/0	174/92	0.006064		1	BovineHD0100020179	1	2	REC	5/9	47/219	0.1478
1	Hapmap39468-BTA-120746	69942383	1	0.4286	0.2519	2	0.04676	2.228		1	Hapmap39468-BTA-120746	1	2	DOM	10/4	119/151	0.05544		1	Hapmap39468-BTA-120746	1	2	REC	2/12	17/253	0.2386
1	BovineHD0100020187	69979144	2	0.6786	0.4185	1	0.009862	2.933		1	BovineHD0100020187	2	1	DOM	14/0	178/92	0.00608		1	BovineHD0100020187	2	1	REC	5/9	48/222	0.1488
1	BovineHD0100020191	70001473	2	0.3846	0.1648	1	0.007803	3.168		1	BovineHD0100020191	2	1	DOM	8/5	81/186	0.02925		1	BovineHD0100020191	2	1	REC	2/11	7/260	0.05965
1	BTB-00031796	70049185	2	0.4286	0.2472	1	0.04389	2.284		1	BTB-00031796	2	1	DOM	10/4	117/154	0.05223		1	BTB-00031796	2	1	REC	2/12	17/254	0.2374
1	Hapmap59145-ss46526952	70228691	2	0.3929	0.2897	1	0.2874	1.587		1	Hapmap59145-ss46526952	2	1	DOM	9/5	143/128	0.4273		1	Hapmap59145-ss46526952	2	1	REC	2/12	14/257	0.1812
1	Hapmap50667-BTA-34616	70362584	2	0.1786	0.1974	1	1	0.8838		1	Hapmap50667-BTA-34616	2	1	DOM	5/9	96/175	1		1	Hapmap50667-BTA-34616	2	1	REC	0/14	11/260	1
1	ARS-BFGL-NGS-80523	70384365	1	0.5714	0.4834	2	0.4394	1.425		1	ARS-BFGL-NGS-80523	1	2	DOM	11/3	196/75	0.7646		1	ARS-BFGL-NGS-80523	1	2	REC	5/9	66/205	0.3483
1	BovineHD0100020322	70392743	2	0.4286	0.3074	1	0.2098	1.69		1	BovineHD0100020322	2	1	DOM	9/5	148/122	0.5874		1	BovineHD0100020322	2	1	REC	3/11	18/252	0.07473
1	BovineHD0100020325	70398856	2	0.5	0.3941	1	0.3228	1.538		1	BovineHD0100020325	2	1	DOM	10/4	175/94	0.777		1	BovineHD0100020325	2	1	REC	4/10	37/232	0.128
1	BovineHD0100020329	70404106	1	0.5	0.3963	2	0.324	1.523		1	BovineHD0100020329	1	2	DOM	10/4	176/94	0.7773		1	BovineHD0100020329	1	2	REC	4/10	38/232	0.1358
1	BovineHD0100020334	70412669	2	0.5	0.3941	1	0.3228	1.538		1	BovineHD0100020334	2	1	DOM	10/4	175/94	0.777		1	BovineHD0100020334	2	1	REC	4/10	37/232	0.128
1	BovineHD0100020342	70429089	1	0.1071	0.1283	2	1	0.8157		1	BovineHD0100020342	1	2	DOM	3/11	64/205	1		1	BovineHD0100020342	1	2	REC	0/14	5/264	1
1	ARS-BFGL-NGS-119161	70459221	2	0.6071	0.4834	1	0.2458	1.652		1	ARS-BFGL-NGS-119161	2	1	DOM	13/1	197/74	0.1235		1	ARS-BFGL-NGS-119161	2	1	REC	4/10	65/206	0.7499
1	BovineHD0100020373	70493042	2	0.4286	0.4275	1	1	1.004		1	BovineHD0100020373	2	1	DOM	10/4	186/83	1		1	BovineHD0100020373	2	1	REC	2/12	44/225	1
1	BovineHD0100020392	70523321	2	0.6071	0.4925	1	0.2515	1.592		1	BovineHD0100020392	2	1	DOM	13/1	199/69	0.2007		1	BovineHD0100020392	2	1	REC	4/10	65/203	0.7513
1	BovineHD0100020393	70527905	1	0.1429	0.2325	2	0.358	0.5503		1	BovineHD0100020393	1	2	DOM	4/10	110/161	0.4178		1	BovineHD0100020393	1	2	REC	0/14	16/255	1
1	BovineHD0100020394	70532358	2	0.2857	0.3086	1	1	0.8964		1	BovineHD0100020394	2	1	DOM	8/6	148/121	1		1	BovineHD0100020394	2	1	REC	0/14	18/251	1
1	BovineHD0100020415	70559726	1	0.3214	0.3653	2	0.6922	0.823		1	BovineHD0100020415	1	2	DOM	9/5	173/98	1		1	BovineHD0100020415	1	2	REC	0/14	25/246	0.6204
1	ARS-BFGL-NGS-95516	70621981	2	0.2143	0.369	1	0.1093	0.4664		1	ARS-BFGL-NGS-95516	2	1	DOM	6/8	168/103	0.1687		1	ARS-BFGL-NGS-95516	2	1	REC	0/14	32/239	0.3796
1	ARS-BFGL-NGS-5124	70656139	1	0.5	0.4834	2	1	1.069		1	ARS-BFGL-NGS-5124	1	2	DOM	10/4	205/66	0.752		1	ARS-BFGL-NGS-5124	1	2	REC	4/10	57/214	0.5077
1	BovineHD0100020477	70735271	2	0	0.04428	1	0.6233	0		1	BovineHD0100020477	2	1	DOM	0/14	24/247	0.6164		1	BovineHD0100020477	2	1	REC	0/14	0/271	1
1	ARS-BFGL-BAC-35332	70741856	2	0.3214	0.3376	1	1	0.9292		1	ARS-BFGL-BAC-35332	2	1	DOM	8/6	156/115	1		1	ARS-BFGL-BAC-35332	2	1	REC	1/13	27/244	1
1	ARS-BFGL-NGS-97095	70823693	2	0.25	0.2232	1	0.8161	1.16		1	ARS-BFGL-NGS-97095	2	1	DOM	6/8	112/159	1		1	ARS-BFGL-NGS-97095	2	1	REC	1/13	9/262	0.4007
1	Hapmap43841-BTA-34601	70897439	1	0.5357	0.4779	2	0.5671	1.261		1	Hapmap43841-BTA-34601	1	2	DOM	11/3	200/71	1		1	Hapmap43841-BTA-34601	1	2	REC	4/10	59/212	0.5187
1	AX-18269003	70935289	1	0.1429	0.1956	2	0.6274	0.6855		1	AX-18269003	1	2	DOM	3/11	95/176	0.3934		1	AX-18269003	1	2	REC	1/13	11/260	0.4603
1	AX-18269029	70941629	1	0.1429	0.1956	2	0.6274	0.6855		1	AX-18269029	1	2	DOM	3/11	95/176	0.3934		1	AX-18269029	1	2	REC	1/13	11/260	0.4603
1	BovineHD0100020535	70973829	2	0.1429	0.1937	1	0.6277	0.6937		1	BovineHD0100020535	2	1	DOM	3/11	94/177	0.3948		1	BovineHD0100020535	2	1	REC	1/13	11/260	0.4603
1	BovineHD0100020540	70987820	2	0.2143	0.2407	1	1	0.8605		1	BovineHD0100020540	2	1	DOM	4/10	111/157	0.4125		1	BovineHD0100020540	2	1	REC	2/12	18/250	0.2605
1	Hapmap40324-BTA-34602	70995564	2	0.1429	0.1937	1	0.6277	0.6937		1	Hapmap40324-BTA-34602	2	1	DOM	3/11	94/177	0.3948		1	Hapmap40324-BTA-34602	2	1	REC	1/13	11/260	0.4603
1	BTA-34631-no-rs	71013954	1	0.1429	0.2111	2	0.4801	0.6228		1	BTA-34631-no-rs	1	2	DOM	3/11	100/170	0.2716		1	BTA-34631-no-rs	1	2	REC	1/13	14/256	0.5407
1	BovineHD0100020549	71042439	2	0.1071	0.2332	1	0.164	0.3946		1	BovineHD0100020549	2	1	DOM	3/11	111/157	0.1694		1	BovineHD0100020549	2	1	REC	0/14	14/254	1
1	BovineHD0100020557	71067483	1	0.25	0.3007	2	0.6748	0.7751		1	BovineHD0100020557	1	2	DOM	6/8	135/136	0.7854		1	BovineHD0100020557	1	2	REC	1/13	28/243	1
1	BovineHD0100020562	71083170	2	0.1786	0.1439	1	0.584	1.293		1	BovineHD0100020562	2	1	DOM	5/9	75/196	0.546		1	BovineHD0100020562	2	1	REC	0/14	3/268	1
1	ARS-BFGL-NGS-56509	71132759	2	0.3214	0.3118	1	1	1.045		1	ARS-BFGL-NGS-56509	2	1	DOM	7/7	140/131	1		1	ARS-BFGL-NGS-56509	2	1	REC	2/12	29/242	0.655
1	ARS-BFGL-NGS-16910	71155649	1	0.07143	0.1421	2	0.4056	0.4645		1	ARS-BFGL-NGS-16910	1	2	DOM	2/12	74/197	0.3667		1	ARS-BFGL-NGS-16910	1	2	REC	0/14	3/268	1
1	BovineHD0100020591	71163004	2	0.2143	0.1808	1	0.6192	1.236		1	BovineHD0100020591	2	1	DOM	6/8	90/181	0.5631		1	BovineHD0100020591	2	1	REC	0/14	8/263	1
1	BovineHD0100020593	71170757	1	0.2143	0.2707	2	0.6626	0.7348		1	BovineHD0100020593	1	2	DOM	6/8	135/131	0.5958		1	BovineHD0100020593	1	2	REC	0/14	9/257	1
1	BTA-34638-no-rs	71190486	1	0.4643	0.4539	2	1	1.043		1	BTA-34638-no-rs	1	2	DOM	10/4	192/79	1		1	BTA-34638-no-rs	1	2	REC	3/11	54/217	1
1	BovineHD0100020624	71301132	2	0.07143	0.1426	1	0.4055	0.4625		1	BovineHD0100020624	2	1	DOM	2/12	74/196	0.3661		1	BovineHD0100020624	2	1	REC	0/14	3/267	1
1	BTA-120754-no-rs	71322090	1	0.1786	0.2638	2	0.3826	0.6066		1	BTA-120754-no-rs	1	2	DOM	5/9	130/141	0.4216		1	BTA-120754-no-rs	1	2	REC	0/14	13/258	1
1	BovineHD0100020633	71338285	1	0.4286	0.4815	2	0.699	0.8075		1	BovineHD0100020633	1	2	DOM	10/4	195/76	1		1	BovineHD0100020633	1	2	REC	2/12	66/205	0.5303
1	BTA-34624-no-rs	71411178	2	0.1786	0.2638	1	0.3826	0.6066		1	BTA-34624-no-rs	2	1	DOM	5/9	130/141	0.4216		1	BTA-34624-no-rs	2	1	REC	0/14	13/258	1
1	Hapmap60655-rs29025422	71442587	2	0.1786	0.131	1	0.4038	1.442		1	Hapmap60655-rs29025422	2	1	DOM	4/10	64/207	0.748		1	Hapmap60655-rs29025422	2	1	REC	1/13	7/264	0.3351
1	BovineHD4100000414	71443933	1	0.25	0.2167	2	0.6432	1.205		1	BovineHD4100000414	1	2	DOM	6/8	110/160	1		1	BovineHD4100000414	1	2	REC	1/13	7/263	0.3361
1	ARS-BFGL-NGS-117761	71471058	2	0.1429	0.2343	1	0.358	0.5446		1	ARS-BFGL-NGS-117761	2	1	DOM	4/10	115/156	0.4085		1	ARS-BFGL-NGS-117761	2	1	REC	0/14	12/259	1
1	ARS-BFGL-NGS-37507	71493393	2	0.07143	0.1426	1	0.4055	0.4625		1	ARS-BFGL-NGS-37507	2	1	DOM	2/12	74/196	0.3661		1	ARS-BFGL-NGS-37507	2	1	REC	0/14	3/267	1
1	BovineHD0100020685	71566792	2	0.3214	0.4777	1	0.1223	0.5179		1	BovineHD0100020685	2	1	DOM	9/5	204/65	0.3455		1	BovineHD0100020685	2	1	REC	0/14	53/216	0.07989
1	BovineHD0100020689	71609698	2	0.4286	0.4312	1	1	0.9892		1	BovineHD0100020689	2	1	DOM	8/6	189/80	0.3713		1	BovineHD0100020689	2	1	REC	4/10	43/226	0.2609
1	BovineHD0100020706	71741471	2	0.1429	0.2796	1	0.1311	0.4294		1	BovineHD0100020706	2	1	DOM	4/10	132/138	0.1742		1	BovineHD0100020706	2	1	REC	0/14	19/251	0.609
1	Hapmap51434-BTA-34642	71760764	1	0.1429	0.2343	2	0.358	0.5446		1	Hapmap51434-BTA-34642	1	2	DOM	4/10	115/156	0.4085		1	Hapmap51434-BTA-34642	1	2	REC	0/14	12/259	1
1	ARS-BFGL-NGS-118075	71834357	2	0.3929	0.4686	1	0.5607	0.7337		1	ARS-BFGL-NGS-118075	2	1	DOM	10/4	197/74	1		1	ARS-BFGL-NGS-118075	2	1	REC	1/13	57/214	0.3142
1	BovineHD0100020739	71877041	2	0.3929	0.363	1	0.8408	1.136		1	BovineHD0100020739	2	1	DOM	8/6	163/107	0.7878		1	BovineHD0100020739	2	1	REC	3/11	33/237	0.3982
1	BovineHD0100020740	71881432	1	0.1154	0.2632	2	0.1091	0.3652		1	BovineHD0100020740	1	2	DOM	3/10	125/141	0.1519		1	BovineHD0100020740	1	2	REC	0/13	15/251	1
1	BovineHD0100020747	71906154	2	0.3929	0.3848	1	1	1.035		1	BovineHD0100020747	2	1	DOM	8/6	171/98	0.7771		1	BovineHD0100020747	2	1	REC	3/11	36/233	0.4196
1	BovineHD0100020749	71917411	1	0.1154	0.2622	2	0.1094	0.3671		1	BovineHD0100020749	1	2	DOM	3/10	124/143	0.1523		1	BovineHD0100020749	1	2	REC	0/13	16/251	1
1	BovineHD0100020757	71943334	2	0.1786	0.1861	1	1	0.9508		1	BovineHD0100020757	2	1	DOM	5/9	91/175	1		1	BovineHD0100020757	2	1	REC	0/14	8/258	1
1	BovineHD0100020760	71952136	2	0.1071	0.1468	1	0.7838	0.6972		1	BovineHD0100020760	2	1	DOM	3/11	74/195	0.7649		1	BovineHD0100020760	2	1	REC	0/14	5/264	1
1	BovineHD0100020767	71982562	2	0.1786	0.2948	1	0.2077	0.5201		1	BovineHD0100020767	2	1	DOM	5/9	133/135	0.4135		1	BovineHD0100020767	2	1	REC	0/14	25/243	0.6214
1	BovineHD0100020781	72027628	2	0.1429	0.2537	1	0.2613	0.4902		1	BovineHD0100020781	2	1	DOM	4/10	120/148	0.2792		1	BovineHD0100020781	2	1	REC	0/14	16/252	1
1	ARS-BFGL-NGS-45476	72032606	1	0.07143	0.214	2	0.09148	0.2825		1	ARS-BFGL-NGS-45476	1	2	DOM	2/12	106/165	0.0883		1	ARS-BFGL-NGS-45476	1	2	REC	0/14	10/261	1
1	BovineHD0100020803	72074777	2	0.1786	0.3672	1	0.04439	0.3747		1	BovineHD0100020803	2	1	DOM	5/9	169/102	0.05365		1	BovineHD0100020803	2	1	REC	0/14	30/241	0.3753
1	ARS-BFGL-NGS-117741	72081243	1	0.3214	0.452	2	0.2417	0.5742		1	ARS-BFGL-NGS-117741	1	2	DOM	9/5	188/83	0.7681		1	ARS-BFGL-NGS-117741	1	2	REC	0/14	57/214	0.08023
1	Hapmap42521-BTA-35582	72127960	2	0.07143	0.214	1	0.09148	0.2825		1	Hapmap42521-BTA-35582	2	1	DOM	2/12	109/162	0.08808		1	Hapmap42521-BTA-35582	2	1	REC	0/14	7/264	1
1	Hapmap43559-BTA-35576	72193451	1	0.2143	0.3229	2	0.299	0.5719		1	Hapmap43559-BTA-35576	1	2	DOM	5/9	144/127	0.2742		1	Hapmap43559-BTA-35576	1	2	REC	1/13	31/240	1
1	ARS-BFGL-NGS-72532	72236014	1	0.2857	0.2944	2	1	0.9585		1	ARS-BFGL-NGS-72532	1	2	DOM	7/7	139/131	1		1	ARS-BFGL-NGS-72532	1	2	REC	1/13	20/250	1
1	ARS-BFGL-NGS-118725	72355134	2	0.2857	0.3801	1	0.4239	0.6524		1	ARS-BFGL-NGS-118725	2	1	DOM	8/6	178/93	0.5691		1	ARS-BFGL-NGS-118725	2	1	REC	0/14	28/243	0.3747
1	BovineHD0100020917	72419988	2	0.4643	0.1796	1	0.0007698	3.958		1	BovineHD0100020917	2	1	DOM	11/3	90/180	0.0009846		1	BovineHD0100020917	2	1	REC	2/12	7/263	0.06669
1	BovineHD0100020931	72437297	1	0.5357	0.3432	2	0.04349	2.208		1	BovineHD0100020931	1	2	DOM	12/2	157/114	0.04983		1	BovineHD0100020931	1	2	REC	3/11	29/242	0.1986
1	ARS-BFGL-NGS-112042	72470845	1	0.5714	0.4742	2	0.3379	1.479		1	ARS-BFGL-NGS-112042	1	2	DOM	11/3	192/79	0.7636		1	ARS-BFGL-NGS-112042	1	2	REC	5/9	65/206	0.343
1	ARS-BFGL-NGS-100698	72499306	2	0.3214	0.4225	1	0.3306	0.6474		1	ARS-BFGL-NGS-100698	2	1	DOM	8/6	183/88	0.4008		1	ARS-BFGL-NGS-100698	2	1	REC	1/13	46/225	0.4787
1	ARS-BFGL-NGS-59448	72533863	2	0.3929	0.3524	1	0.6879	1.189		1	ARS-BFGL-NGS-59448	2	1	DOM	8/6	157/114	1		1	ARS-BFGL-NGS-59448	2	1	REC	3/11	34/237	0.4036
1	BovineHD0100021005	72558796	2	0.3571	0.3727	1	1	0.9352		1	BovineHD0100021005	2	1	DOM	7/7	165/102	0.408		1	BovineHD0100021005	2	1	REC	3/11	34/233	0.4069
1	BovineHD0100021012	72576429	2	0.3571	0.3745	1	1	0.9278		1	BovineHD0100021012	2	1	DOM	7/7	167/100	0.4018		1	BovineHD0100021012	2	1	REC	3/11	33/234	0.4004
1	BovineHD0100021013	72577120	1	0.3571	0.3727	2	1	0.9352		1	BovineHD0100021013	1	2	DOM	7/7	165/102	0.408		1	BovineHD0100021013	1	2	REC	3/11	34/233	0.4069
1	BovineHD0100021016	72580910	2	0.3571	0.3727	1	1	0.9352		1	BovineHD0100021016	2	1	DOM	7/7	165/102	0.408		1	BovineHD0100021016	2	1	REC	3/11	34/233	0.4069
1	BovineHD0100021018	72592573	2	0.3571	0.3727	1	1	0.9351		1	BovineHD0100021018	2	1	DOM	7/7	167/104	0.4097		1	BovineHD0100021018	2	1	REC	3/11	35/236	0.4103
1	Hapmap41511-BTA-34652	72631840	2	0.6429	0.4594	1	0.07912	2.118		1	Hapmap41511-BTA-34652	2	1	DOM	14/0	190/81	0.01268		1	Hapmap41511-BTA-34652	2	1	REC	4/10	59/212	0.5187
1	BovineHD0100021036	72684320	2	0.2857	0.3339	1	0.6842	0.7978		1	BovineHD0100021036	2	1	DOM	6/8	153/118	0.4102		1	BovineHD0100021036	2	1	REC	2/12	28/243	0.6482
1	BovineHD0100021037	72688416	2	0.2308	0.3195	1	0.3949	0.6388		1	BovineHD0100021037	2	1	DOM	6/7	142/124	0.7775		1	BovineHD0100021037	2	1	REC	0/13	28/238	0.3754
1	BovineHD4100000422	72695403	2	0.1538	0.2228	1	0.6268	0.6341		1	BovineHD4100000422	2	1	DOM	4/9	103/164	0.7719		1	BovineHD4100000422	2	1	REC	0/13	16/251	1
1	BovineHD0100021041	72703269	2	0.2857	0.3321	1	0.6848	0.8044		1	BovineHD0100021041	2	1	DOM	6/8	152/119	0.4118		1	BovineHD0100021041	2	1	REC	2/12	28/243	0.6482
1	BovineHD4100000423	72720904	2	0.6154	0.3989	1	0.0395	2.411		1	BovineHD4100000423	2	1	DOM	11/2	170/97	0.1477		1	BovineHD4100000423	2	1	REC	5/8	43/224	0.05249
1	Hapmap40716-BTA-34647	72797154	1	0.3571	0.131	2	0.002929	3.685		1	Hapmap40716-BTA-34647	1	2	DOM	10/4	69/202	0.0006157		1	Hapmap40716-BTA-34647	1	2	REC	0/14	2/269	1
1	BovineHD0100021081	72860587	1	0.3214	0.1204	2	0.005843	3.462		1	BovineHD0100021081	1	2	DOM	9/5	64/206	0.002057		1	BovineHD0100021081	1	2	REC	0/14	1/269	1
1	Hapmap35151-BES4_Contig435_1199	72880876	2	0.3214	0.4483	1	0.242	0.5828		1	Hapmap35151-BES4_Contig435_1199	2	1	DOM	9/5	187/84	0.7695		1	Hapmap35151-BES4_Contig435_1199	2	1	REC	0/14	56/215	0.07971
1	BTA-34645-no-rs	72960557	1	0.3571	0.131	2	0.002929	3.685		1	BTA-34645-no-rs	1	2	DOM	9/5	69/202	0.003391		1	BTA-34645-no-rs	1	2	REC	1/13	2/269	0.1407
1	AX-18277826	73069219	1	0.1786	0.2066	2	1	0.8346		1	AX-18277826	1	2	DOM	5/9	102/169	1		1	AX-18277826	1	2	REC	0/14	10/261	1
1	BovineHD0100021145	73140826	2	0.3929	0.4926	1	0.337	0.6664		1	BovineHD0100021145	2	1	DOM	9/5	206/65	0.343		1	BovineHD0100021145	2	1	REC	2/12	61/210	0.7419
1	ARS-BFGL-NGS-93288	73178671	2	0.03571	0.01476	1	0.3666	2.472		1	ARS-BFGL-NGS-93288	2	1	DOM	1/13	8/263	0.3687		1	ARS-BFGL-NGS-93288	2	1	REC	0/14	0/271	1
1	ARS-BFGL-NGS-25392	73207902	2	0.03571	0.08303	1	0.7178	0.4091		1	ARS-BFGL-NGS-25392	2	1	DOM	1/13	44/227	0.7049		1	ARS-BFGL-NGS-25392	2	1	REC	0/14	1/270	1
1	Hapmap42919-BTA-35600	73274077	1	0.5	0.4723	2	0.8472	1.117		1	Hapmap42919-BTA-35600	1	2	DOM	11/3	199/72	1		1	Hapmap42919-BTA-35600	1	2	REC	3/11	57/214	1
1	BovineHD0100021200	73321242	2	0.5	0.4594	1	0.6928	1.177		1	BovineHD0100021200	2	1	DOM	10/3	194/77	1		1	BovineHD0100021200	2	1	REC	3/10	55/216	0.7326
1	ARS-BFGL-NGS-53144	73435277	2	0.3929	0.1716	1	0.00915	3.124		1	ARS-BFGL-NGS-53144	2	1	DOM	10/4	86/185	0.006256		1	ARS-BFGL-NGS-53144	2	1	REC	1/13	7/264	0.3351
1	ARS-BFGL-NGS-23062	73463897	1	0.6786	0.4871	2	0.05377	2.223		1	ARS-BFGL-NGS-23062	1	2	DOM	13/1	204/67	0.1997		1	ARS-BFGL-NGS-23062	1	2	REC	6/8	60/211	0.09946
1	BovineHD0100021254	73530556	1	0.1923	0.1747	2	0.7929	1.125		1	BovineHD0100021254	1	2	DOM	4/9	82/187	1		1	BovineHD0100021254	1	2	REC	1/12	12/257	0.466
1	ARS-BFGL-NGS-32169	73586758	2	0.1429	0.2177	1	0.4794	0.5989		1	ARS-BFGL-NGS-32169	2	1	DOM	4/10	102/169	0.5812		1	ARS-BFGL-NGS-32169	2	1	REC	0/14	16/255	1
1	BovineHD0100021274	73600387	2	0.6923	0.4758	1	0.04295	2.479		1	BovineHD0100021274	2	1	DOM	12/1	187/82	0.1171		1	BovineHD0100021274	2	1	REC	6/7	69/200	0.1145
1	ARS-BFGL-BAC-36572	73608012	1	0.1429	0.2841	2	0.13	0.4199		1	ARS-BFGL-BAC-36572	1	2	DOM	4/10	127/144	0.2716		1	ARS-BFGL-BAC-36572	1	2	REC	0/14	27/244	0.3759
1	BovineHD0100021284	73652242	1	0.3846	0.4963	2	0.3176	0.6343		1	BovineHD0100021284	1	2	DOM	10/3	197/73	1		1	BovineHD0100021284	1	2	REC	0/13	71/199	0.04324
1	BTA-35628-no-rs	73671409	1	0.1429	0.1974	2	0.6272	0.6776		1	BTA-35628-no-rs	1	2	DOM	4/10	94/177	0.7775		1	BTA-35628-no-rs	1	2	REC	0/14	13/258	1
1	UA-IFASA-4774	73714346	2	0.4643	0.3081	1	0.09605	1.946		1	UA-IFASA-4774	2	1	DOM	12/2	136/135	0.01174		1	UA-IFASA-4774	2	1	REC	1/13	31/240	1
1	ARS-BFGL-NGS-114627	73744599	1	0.3214	0.3579	2	0.8403	0.8497		1	ARS-BFGL-NGS-114627	1	2	DOM	8/6	161/110	1		1	ARS-BFGL-NGS-114627	1	2	REC	1/13	33/238	1
1	BovineHD0100021316	73749733	1	0.6071	0.4576	2	0.1729	1.832		1	BovineHD0100021316	1	2	DOM	13/1	186/85	0.07154		1	BovineHD0100021316	1	2	REC	4/10	62/209	0.7448
1	BovineHD0100021318	73754036	2	0.5	0.3309	1	0.0898	2.022		1	BovineHD0100021318	2	1	DOM	12/1	146/123	0.007879		1	BovineHD0100021318	2	1	REC	1/12	32/237	1
1	BovineHD0100021321	73767633	1	0.5385	0.4519	2	0.4244	1.415		1	BovineHD0100021321	1	2	DOM	12/1	184/86	0.07184		1	BovineHD0100021321	1	2	REC	2/11	60/210	0.7402
1	BTA-35631-no-rs	73789857	2	0.1071	0.1218	1	1	0.8655		1	BTA-35631-no-rs	2	1	DOM	3/11	62/209	1		1	BTA-35631-no-rs	2	1	REC	0/14	4/267	1
1	BovineHD0100021334	73816649	2	0.1071	0.1222	1	1	0.8618		1	BovineHD0100021334	2	1	DOM	3/11	62/208	1		1	BovineHD0100021334	2	1	REC	0/14	4/266	1
1	BovineHD0100021364	73945134	2	0.1786	0.3155	1	0.1457	0.4717		1	BovineHD0100021364	2	1	DOM	5/9	145/126	0.2729		1	BovineHD0100021364	2	1	REC	0/14	26/245	0.6249
1	Hapmap38109-BTA-36588	73971461	2	0.03571	0.1181	1	0.235	0.2766		1	Hapmap38109-BTA-36588	2	1	DOM	1/13	60/211	0.3148		1	Hapmap38109-BTA-36588	2	1	REC	0/14	4/267	1
1	BovineHD0100021422	74027229	2	0.07692	0.06458	1	0.6834	1.207		1	BovineHD0100021422	2	1	DOM	2/11	33/238	0.6663		1	BovineHD0100021422	2	1	REC	0/13	2/269	1
1	BovineHD0100021430	74062960	1	0.25	0.25	2	1	1		1	BovineHD0100021430	1	2	DOM	7/7	115/155	0.5927		1	BovineHD0100021430	1	2	REC	0/14	20/250	0.6086
1	BovineHD0100021450	74103245	1	0.1923	0.1439	2	0.5664	1.416		1	BovineHD0100021450	1	2	DOM	5/8	70/201	0.3384		1	BovineHD0100021450	1	2	REC	0/13	8/263	1
1	BTA-36593-no-rs	74141004	1	0.07143	0.03506	2	0.2759	2.117		1	BTA-36593-no-rs	1	2	DOM	2/12	18/253	0.2565		1	BTA-36593-no-rs	1	2	REC	0/14	1/270	1
1	ARS-BFGL-NGS-81861	74559106	2	0.2857	0.3111	1	0.8376	0.8857		1	ARS-BFGL-NGS-81861	2	1	DOM	8/6	146/124	1		1	ARS-BFGL-NGS-81861	2	1	REC	0/14	22/248	0.6109
1	BovineHD0100021626	74644792	2	0.3571	0.4705	1	0.3315	0.6253		1	BovineHD0100021626	2	1	DOM	9/5	202/69	0.3663		1	BovineHD0100021626	2	1	REC	1/13	53/218	0.4812
1	Hapmap51396-BTA-114937	74646138	1	0	0.1421	2	0.02297	0		1	Hapmap51396-BTA-114937	1	2	DOM	0/14	73/198	0.02433		1	Hapmap51396-BTA-114937	1	2	REC	0/14	4/267	1
1	ARS-BFGL-NGS-37067	74688985	2	0.25	0.3875	1	0.1659	0.527		1	ARS-BFGL-NGS-37067	2	1	DOM	7/7	165/106	0.4174		1	ARS-BFGL-NGS-37067	2	1	REC	0/14	45/226	0.1368
1	Hapmap60658-rs29025870	74716669	2	0	0.0203	1	1	0		1	Hapmap60658-rs29025870	2	1	DOM	0/14	11/260	1		1	Hapmap60658-rs29025870	2	1	REC	0/14	0/271	1
1	BovineHD0100021666	74729378	2	0.1154	0.1444	1	1	0.7726		1	BovineHD0100021666	2	1	DOM	3/10	72/198	1		1	BovineHD0100021666	2	1	REC	0/13	6/264	1
1	Hapmap51567-BTA-17154	74751617	1	0.07143	0.02768	2	0.201	2.703		1	Hapmap51567-BTA-17154	1	2	DOM	2/12	15/256	0.1997		1	Hapmap51567-BTA-17154	1	2	REC	0/14	0/271	1
1	BovineHD0100021709	74861369	2	0.08333	0.221	1	0.1309	0.3205		1	BovineHD0100021709	2	1	DOM	2/10	107/160	0.1352		1	BovineHD0100021709	2	1	REC	0/12	11/256	1
1	Hapmap25308-BTA-153014	74893925	1	0.3929	0.2989	2	0.2971	1.518		1	Hapmap25308-BTA-153014	1	2	DOM	10/4	136/135	0.1706		1	Hapmap25308-BTA-153014	1	2	REC	1/13	26/245	1
1	BovineHD0100021731	74943999	1	0.25	0.3815	2	0.229	0.5405		1	BovineHD0100021731	1	2	DOM	6/8	177/93	0.09334		1	BovineHD0100021731	1	2	REC	1/13	29/241	1
1	ARS-BFGL-NGS-116528	74955005	1	0.1154	0.1338	2	1	0.8442		1	ARS-BFGL-NGS-116528	1	2	DOM	3/10	67/202	1		1	ARS-BFGL-NGS-116528	1	2	REC	0/13	5/264	1
1	ARS-BFGL-NGS-34525	74976635	2	0.2143	0.3266	1	0.2991	0.5624		1	ARS-BFGL-NGS-34525	2	1	DOM	6/8	150/121	0.4161		1	ARS-BFGL-NGS-34525	2	1	REC	0/14	27/244	0.3759
1	BovineHD0100021752	75000671	1	0.4643	0.4594	2	1	1.02		1	BovineHD0100021752	1	2	DOM	9/5	198/73	0.5398		1	BovineHD0100021752	1	2	REC	4/10	51/220	0.4837
1	ARS-BFGL-NGS-15456	75006721	1	0.2143	0.3266	2	0.2991	0.5624		1	ARS-BFGL-NGS-15456	1	2	DOM	6/8	150/121	0.4161		1	ARS-BFGL-NGS-15456	1	2	REC	0/14	27/244	0.3759
1	BovineHD0100021760	75020131	1	0.5769	0.3155	2	0.009008	2.959		1	BovineHD0100021760	1	2	DOM	12/1	146/125	0.00775		1	BovineHD0100021760	1	2	REC	3/10	25/246	0.1253
1	BovineHD0100021766	75040457	1	0.2308	0.1828	2	0.6034	1.341		1	BovineHD0100021766	1	2	DOM	6/7	87/181	0.3675		1	BovineHD0100021766	1	2	REC	0/13	11/257	1
1	BovineHD0100021769	75049173	1	0.5385	0.4648	2	0.5476	1.343		1	BovineHD0100021769	1	2	DOM	13/0	197/73	0.0245		1	BovineHD0100021769	1	2	REC	1/12	54/216	0.4742
1	BovineHD0100021799	75160480	2	0.3929	0.3395	1	0.5471	1.259		1	BovineHD0100021799	2	1	DOM	10/4	148/123	0.2758		1	BovineHD0100021799	2	1	REC	1/13	36/235	1
1	Hapmap39961-BTA-100527	75184170	2	0.4286	0.441	1	1	0.9508		1	Hapmap39961-BTA-100527	2	1	DOM	9/5	186/85	0.7711		1	Hapmap39961-BTA-100527	2	1	REC	3/11	53/218	0.7421
1	BovineHD0100021814	75240418	1	0.1538	0.3524	2	0.05461	0.3341		1	BovineHD0100021814	1	2	DOM	4/9	156/115	0.08369		1	BovineHD0100021814	1	2	REC	0/13	35/236	0.3802
1	Hapmap59172-rs29012834	75269086	2	0.07143	0.179	1	0.2003	0.3529		1	Hapmap59172-rs29012834	2	1	DOM	2/12	86/185	0.2389		1	Hapmap59172-rs29012834	2	1	REC	0/14	11/260	1
1	BovineHD0100021825	75294719	1	0.3929	0.5	2	0.3335	0.6471		1	BovineHD0100021825	1	2	DOM	9/5	202/69	0.3663		1	BovineHD0100021825	1	2	REC	2/12	69/202	0.529
1	ARS-BFGL-NGS-72713	75346472	1	0.2143	0.2546	2	0.8239	0.7984		1	ARS-BFGL-NGS-72713	1	2	DOM	5/9	121/150	0.5897		1	ARS-BFGL-NGS-72713	1	2	REC	1/13	17/254	0.6077
1	BovineHD0100021876	75479315	1	0.5385	0.2741	2	0.006473	3.09		1	BovineHD0100021876	1	2	DOM	10/3	130/140	0.04985		1	BovineHD0100021876	1	2	REC	4/9	18/252	0.01239
1	BovineHD0100021879	75486197	2	0.6154	0.3755	1	0.02161	2.661		1	BovineHD0100021879	2	1	DOM	12/1	161/108	0.01916		1	BovineHD0100021879	2	1	REC	4/9	41/228	0.1355
1	BovineHD0100021922	75570333	1	0.3462	0.4963	2	0.1613	0.5373		1	BovineHD0100021922	1	2	DOM	8/5	205/66	0.3223		1	BovineHD0100021922	1	2	REC	1/12	64/207	0.3103
1	BovineHD0100021932	75602779	2	0.07692	0.03321	1	0.2315	2.426		1	BovineHD0100021932	2	1	DOM	2/11	18/253	0.2304		1	BovineHD0100021932	2	1	REC	0/13	0/271	1
1	ARS-BFGL-NGS-64672	75635752	2	0.3214	0.3819	1	0.5569	0.7666		1	ARS-BFGL-NGS-64672	2	1	DOM	9/5	172/99	1		1	ARS-BFGL-NGS-64672	2	1	REC	0/14	35/236	0.2303
1	Hapmap42898-BTA-28764	75682742	2	0	0.01845	1	1	0		1	Hapmap42898-BTA-28764	2	1	DOM	0/14	10/261	1		1	Hapmap42898-BTA-28764	2	1	REC	0/14	0/271	1
1	BTA-28763-no-rs	75716538	1	0.1786	0.2712	2	0.3814	0.5841		1	BTA-28763-no-rs	1	2	DOM	5/9	127/144	0.5843		1	BTA-28763-no-rs	1	2	REC	0/14	20/251	0.6087
1	BovineHD0100021976	75755758	2	0.5385	0.4389	1	0.3218	1.492		1	BovineHD0100021976	2	1	DOM	11/2	181/89	0.2355		1	BovineHD0100021976	2	1	REC	3/10	56/214	0.7376
1	ARS-BFGL-BAC-31487	75852855	1	0.2143	0.2694	2	0.6627	0.7397		1	ARS-BFGL-BAC-31487	1	2	DOM	6/8	122/149	1		1	ARS-BFGL-BAC-31487	1	2	REC	0/14	24/247	0.6164
1	BovineHD0100022054	75904016	1	0.4231	0.4907	2	0.5511	0.761		1	BovineHD0100022054	1	2	DOM	9/4	197/73	0.7549		1	BovineHD0100022054	1	2	REC	2/11	68/202	0.53
1	BovineHD0100022062	75933471	2	0.3462	0.2463	1	0.2521	1.62		1	BovineHD0100022062	2	1	DOM	9/4	116/154	0.08555		1	BovineHD0100022062	2	1	REC	0/13	17/253	1
1	BovineHD0100022071	75978132	1	0.3462	0.1255	2	0.004398	3.69		1	BovineHD0100022071	1	2	DOM	9/4	66/205	0.001164		1	BovineHD0100022071	1	2	REC	0/13	2/269	1
1	BovineHD0100022072	75982657	1	0.5769	0.4	2	0.1007	2.045		1	BovineHD0100022072	1	2	DOM	11/2	174/96	0.2309		1	BovineHD0100022072	1	2	REC	4/9	42/228	0.2372
1	Hapmap44063-BTA-36599	76003958	1	0.3214	0.1162	2	0.004698	3.602		1	Hapmap44063-BTA-36599	1	2	DOM	9/5	62/209	0.0016		1	Hapmap44063-BTA-36599	1	2	REC	0/14	1/270	1
1	BovineHD0100022079	76022080	2	0.5769	0.3996	1	0.1005	2.049		1	BovineHD0100022079	2	1	DOM	11/2	173/96	0.231		1	BovineHD0100022079	2	1	REC	4/9	42/227	0.2377
1	BTA-95639-no-rs	76090160	1	0.03571	0.02583	2	0.5348	1.397		1	BTA-95639-no-rs	1	2	DOM	1/13	14/257	0.5394		1	BTA-95639-no-rs	1	2	REC	0/14	0/271	1
1	BTA-95638-no-rs	76119473	2	0.03571	0.02583	1	0.5348	1.397		1	BTA-95638-no-rs	2	1	DOM	1/13	14/257	0.5394		1	BTA-95638-no-rs	2	1	REC	0/14	0/271	1
1	ARS-BFGL-BAC-31482	76172887	1	0.3214	0.4945	2	0.0829	0.4843		1	ARS-BFGL-BAC-31482	1	2	DOM	9/5	207/64	0.3381		1	ARS-BFGL-BAC-31482	1	2	REC	0/14	61/210	0.04584
1	BovineHD0100022149	76207235	2	0.2692	0.1574	1	0.1675	1.972		1	BovineHD0100022149	2	1	DOM	6/7	79/191	0.22		1	BovineHD0100022149	2	1	REC	1/12	6/264	0.2831
1	BTA-95655-no-rs	76217113	1	0.3571	0.2601	2	0.2741	1.58		1	BTA-95655-no-rs	1	2	DOM	10/4	121/150	0.05801		1	BTA-95655-no-rs	1	2	REC	0/14	20/251	0.6087
1	BovineHD4100000445	76232991	1	0.3846	0.4059	2	1	0.9148		1	BovineHD4100000445	1	2	DOM	10/3	182/89	0.558		1	BovineHD4100000445	1	2	REC	0/13	38/233	0.2278
1	BTA-18708-no-rs	76257377	2	0.3214	0.1292	1	0.008976	3.194		1	BTA-18708-no-rs	2	1	DOM	9/5	68/203	0.003063		1	BTA-18708-no-rs	2	1	REC	0/14	2/269	1
1	Hapmap50334-BTA-36619	76318682	2	0	0.03875	1	0.6164	0		1	Hapmap50334-BTA-36619	2	1	DOM	0/14	21/250	0.6093		1	Hapmap50334-BTA-36619	2	1	REC	0/14	0/271	1
1	BovineHD0100022176	76321233	1	0.2692	0.3277	2	0.6696	0.7558		1	BovineHD0100022176	1	2	DOM	6/7	145/122	0.5829		1	BovineHD0100022176	1	2	REC	1/12	30/237	1
1	BovineHD0100022177	76324446	1	0.5769	0.4551	2	0.2341	1.633		1	BovineHD0100022177	1	2	DOM	12/1	193/74	0.1958		1	BovineHD0100022177	1	2	REC	3/10	50/217	0.7172
1	ARS-BFGL-NGS-34347	76375060	2	0.2857	0.2528	1	0.6613	1.182		1	ARS-BFGL-NGS-34347	2	1	DOM	8/6	119/152	0.4118		1	ARS-BFGL-NGS-34347	2	1	REC	0/14	18/253	1
1	BovineHD0100022236	76555608	2	0.2308	0.1697	1	0.4256	1.467		1	BovineHD0100022236	2	1	DOM	6/7	84/187	0.359		1	BovineHD0100022236	2	1	REC	0/13	8/263	1
1	BovineHD4100000446	76564040	1	0.1071	0.06458	2	0.4224	1.738		1	BovineHD4100000446	1	2	DOM	3/11	35/236	0.4103		1	BovineHD4100000446	1	2	REC	0/14	0/271	1
1	Hapmap44231-BTA-36623	76587512	1	0.4286	0.4686	2	0.7029	0.8504		1	Hapmap44231-BTA-36623	1	2	DOM	11/3	200/71	1		1	Hapmap44231-BTA-36623	1	2	REC	1/13	54/217	0.3186
1	BovineHD0100022255	76616096	1	0.2083	0.1498	2	0.3914	1.493		1	BovineHD0100022255	1	2	DOM	5/7	72/195	0.3218		1	BovineHD0100022255	1	2	REC	0/12	8/259	1
1	BTA-36624-no-rs	76627997	1	0.3214	0.2546	2	0.5058	1.387		1	BTA-36624-no-rs	1	2	DOM	8/6	120/151	0.4138		1	BTA-36624-no-rs	1	2	REC	1/13	18/253	1
1	BovineHD0100022258	76630687	1	0.2692	0.1827	2	0.3002	1.649		1	BovineHD0100022258	1	2	DOM	6/7	87/184	0.3649		1	BovineHD0100022258	1	2	REC	1/12	12/259	0.4635
1	Hapmap34720-BES7_Contig462_688	76662005	2	0.1429	0.1236	1	0.7678	1.182		1	Hapmap34720-BES7_Contig462_688	2	1	DOM	4/10	63/208	0.7463		1	Hapmap34720-BES7_Contig462_688	2	1	REC	0/14	4/267	1
1	ARS-BFGL-NGS-4661	76701704	1	0.1071	0.08856	2	0.7308	1.235		1	ARS-BFGL-NGS-4661	1	2	DOM	3/11	41/230	0.4601		1	ARS-BFGL-NGS-4661	1	2	REC	0/14	7/264	1
1	BovineHD0100022298	76781403	2	0.3846	0.3993	1	1	0.9404		1	BovineHD0100022298	2	1	DOM	9/4	178/90	1		1	BovineHD0100022298	2	1	REC	1/12	36/232	1
1	ARS-BFGL-NGS-92711	76822042	1	0.1154	0.05741	2	0.2001	2.142		1	ARS-BFGL-NGS-92711	1	2	DOM	3/10	31/239	0.1954		1	ARS-BFGL-NGS-92711	1	2	REC	0/13	0/270	1
1	BovineHD0100022312	76841239	1	0.1667	0.1381	2	0.7611	1.249		1	BovineHD0100022312	1	2	DOM	4/8	70/198	0.5232		1	BovineHD0100022312	1	2	REC	0/12	4/264	1
1	Hapmap42923-BTA-36604	76862840	1	0.3214	0.2768	2	0.666	1.238		1	Hapmap42923-BTA-36604	1	2	DOM	9/5	128/143	0.2757		1	Hapmap42923-BTA-36604	1	2	REC	0/14	22/249	0.6108
1	ARS-BFGL-BAC-34664	76937066	1	0.2857	0.4576	2	0.08198	0.4742		1	ARS-BFGL-BAC-34664	1	2	DOM	7/7	193/78	0.1303		1	ARS-BFGL-BAC-34664	1	2	REC	1/13	55/216	0.3166
1	ARS-BFGL-NGS-80187	76984280	2	0	0.01476	1	1	0		1	ARS-BFGL-NGS-80187	2	1	DOM	0/14	8/263	1		1	ARS-BFGL-NGS-80187	2	1	REC	0/14	0/271	1
1	BTA-36608-no-rs	77024680	1	0.3929	0.4262	2	0.8453	0.8711		1	BTA-36608-no-rs	1	2	DOM	10/4	184/87	1		1	BTA-36608-no-rs	1	2	REC	1/13	47/224	0.4774
1	BovineHD0100022375	77039767	2	0.4615	0.21	1	0.005961	3.224		1	BovineHD0100022375	2	1	DOM	10/3	103/166	0.007788		1	BovineHD0100022375	2	1	REC	2/11	10/259	0.09975
1	BovineHD0100022381	77073696	1	0.2083	0.3563	2	0.1889	0.4753		1	BovineHD0100022381	1	2	DOM	5/7	158/110	0.2485		1	BovineHD0100022381	1	2	REC	0/12	33/235	0.3714
1	BovineHD0100022391	77191739	2	0.3077	0.3081	1	1	0.998		1	BovineHD0100022391	2	1	DOM	7/6	146/125	1		1	BovineHD0100022391	2	1	REC	1/12	21/250	1
1	BovineHD0100022400	77211300	1	0.3077	0.3093	2	1	0.9927		1	BovineHD0100022400	1	2	DOM	7/6	146/124	1		1	BovineHD0100022400	1	2	REC	1/12	21/249	1
1	Hapmap41244-BTA-36610	77266687	1	0	0.07196	2	0.2469	0		1	Hapmap41244-BTA-36610	1	2	DOM	0/14	37/234	0.2282		1	Hapmap41244-BTA-36610	1	2	REC	0/14	2/269	1
1	BovineHD0100022431	77305700	1	0.2308	0.3247	2	0.3929	0.6239		1	BovineHD0100022431	1	2	DOM	6/7	146/125	0.7772		1	BovineHD0100022431	1	2	REC	0/13	30/241	0.3735
1	BovineHD0100022450	77354625	2	0.4615	0.3067	1	0.1279	1.938		1	BovineHD0100022450	2	1	DOM	10/3	140/129	0.09338		1	BovineHD0100022450	2	1	REC	2/11	25/244	0.359
1	BovineHD0100022456	77372630	2	0.3077	0.3727	1	0.5416	0.7481		1	BovineHD0100022456	2	1	DOM	8/5	170/101	1		1	BovineHD0100022456	2	1	REC	0/13	32/239	0.3738
1	BovineHD0100022459	77383623	1	0.4643	0.3048	2	0.09365	1.976		1	BovineHD0100022459	1	2	DOM	11/3	133/136	0.0519		1	BovineHD0100022459	1	2	REC	2/12	31/238	0.6712
1	Hapmap58919-rs29009958	77411154	2	0.2857	0.452	1	0.1174	0.4849		1	Hapmap58919-rs29009958	2	1	DOM	8/6	183/88	0.4008		1	Hapmap58919-rs29009958	2	1	REC	0/14	62/209	0.0453
1	BovineHD0100022472	77437362	1	0.5714	0.4889	2	0.4417	1.394		1	BovineHD0100022472	1	2	DOM	12/2	195/76	0.3638		1	BovineHD0100022472	1	2	REC	4/10	70/201	0.7623
1	ARS-BFGL-NGS-56146	77464630	1	0.6071	0.4336	2	0.08066	2.019		1	ARS-BFGL-NGS-56146	1	2	DOM	13/1	179/92	0.0409		1	ARS-BFGL-NGS-56146	1	2	REC	4/10	56/215	0.5027
1	BovineHD0100022485	77478069	2	0.1429	0.0539	1	0.07245	2.925		1	BovineHD0100022485	2	1	DOM	4/10	28/241	0.05981		1	BovineHD0100022485	2	1	REC	0/14	1/268	1
1	BovineHD0100022505	77511314	2	0.2857	0.2934	1	1	0.9635		1	BovineHD0100022505	2	1	DOM	8/6	139/132	0.7868		1	BovineHD0100022505	2	1	REC	0/14	20/251	0.6087
1	BovineHD0100022553	77723763	1	0.5714	0.4244	2	0.1699	1.809		1	BovineHD0100022553	1	2	DOM	13/1	176/95	0.03955		1	BovineHD0100022553	1	2	REC	3/11	54/217	1
1	BovineHD0100022574	77819373	2	0.25	0.2593	1	1	0.9524		1	BovineHD0100022574	2	1	DOM	6/8	119/151	1		1	BovineHD0100022574	2	1	REC	1/13	21/249	1
1	Hapmap39375-BTA-112108	77861430	2	0.4286	0.214	1	0.01732	2.754		1	Hapmap39375-BTA-112108	2	1	DOM	11/3	106/165	0.004579		1	Hapmap39375-BTA-112108	2	1	REC	1/13	10/261	0.4312
1	BovineHD0100022618	77981891	2	0.3214	0.5093	1	0.07941	0.4565		1	BovineHD0100022618	2	1	DOM	8/6	199/71	0.2161		1	BovineHD0100022618	2	1	REC	1/13	76/194	0.1221
1	BovineHD0100022630	78030606	1	0.4615	0.3232	2	0.1981	1.795		1	BovineHD0100022630	1	2	DOM	11/2	138/125	0.02463		1	BovineHD0100022630	1	2	REC	1/12	32/231	1
1	BovineHD0100022631	78033295	1	0.6786	0.4631	2	0.03208	2.448		1	BovineHD0100022631	1	2	DOM	13/1	187/84	0.07202		1	BovineHD0100022631	1	2	REC	6/8	64/207	0.116
1	BovineHD0100022654	78115174	2	0.2143	0.1537	1	0.4209	1.502		1	BovineHD0100022654	2	1	DOM	5/9	75/195	0.547		1	BovineHD0100022654	2	1	REC	1/13	8/262	0.3698
1	BovineHD0100022661	78135652	2	0.2143	0.2472	1	0.8239	0.8305		1	BovineHD0100022661	2	1	DOM	6/8	115/154	1		1	BovineHD0100022661	2	1	REC	0/14	18/251	1
1	Hapmap26500-BTA-37512	78174116	2	0.07143	0.06827	1	1	1.05		1	Hapmap26500-BTA-37512	2	1	DOM	2/12	36/235	1		1	Hapmap26500-BTA-37512	2	1	REC	0/14	1/270	1
1	ARS-BFGL-BAC-31500	78202852	1	0.5357	0.4244	2	0.2486	1.565		1	ARS-BFGL-BAC-31500	1	2	DOM	13/1	173/98	0.03959		1	ARS-BFGL-BAC-31500	1	2	REC	2/12	57/214	0.7417
1	BTA-37493-no-rs	78237770	2	0.03571	0.06089	1	1	0.5713		1	BTA-37493-no-rs	2	1	DOM	1/13	30/241	1		1	BTA-37493-no-rs	2	1	REC	0/14	3/268	1
1	BovineHD0100022701	78279880	2	0.1429	0.158	1	1	0.8882		1	BovineHD0100022701	2	1	DOM	4/10	78/191	1		1	BovineHD0100022701	2	1	REC	0/14	7/262	1
1	BovineHD0100022703	78290520	1	0.6071	0.4185	2	0.0527	2.147		1	BovineHD0100022703	1	2	DOM	13/1	172/98	0.03967		1	BovineHD0100022703	1	2	REC	4/10	54/216	0.4946
1	BTB-00034886	78315800	2	0.1429	0.1771	1	0.8017	0.7743		1	BTB-00034886	2	1	DOM	4/10	89/182	1		1	BTB-00034886	2	1	REC	0/14	7/264	1
1	BovineHD0100022711	78328342	1	0.5714	0.4123	2	0.1164	1.9		1	BovineHD0100022711	1	2	DOM	12/2	169/99	0.09504		1	BovineHD0100022711	1	2	REC	4/10	52/216	0.4885
1	ARS-BFGL-NGS-119431	78397732	1	0.4286	0.4705	2	0.702	0.8441		1	ARS-BFGL-NGS-119431	1	2	DOM	10/4	192/79	1		1	ARS-BFGL-NGS-119431	1	2	REC	2/12	63/208	0.7436
1	BTB-00034743	78445777	2	0.3929	0.4465	1	0.6975	0.8021		1	BTB-00034743	2	1	DOM	10/4	183/88	1		1	BTB-00034743	2	1	REC	1/13	59/212	0.3141
1	BovineHD0100022753	78498849	1	0.1071	0.1916	2	0.3287	0.5064		1	BovineHD0100022753	1	2	DOM	3/11	90/171	0.3954		1	BovineHD0100022753	1	2	REC	0/14	10/251	1
1	Hapmap40722-BTA-36642	78554220	2	0.1071	0.1292	1	1	0.8091		1	Hapmap40722-BTA-36642	2	1	DOM	3/11	64/207	1		1	Hapmap40722-BTA-36642	2	1	REC	0/14	6/265	1
1	BTA-112299-no-rs	78580480	2	0.5357	0.4926	1	0.7015	1.188		1	BTA-112299-no-rs	2	1	DOM	12/2	193/78	0.3628		1	BTA-112299-no-rs	2	1	REC	3/11	74/197	0.7654
1	BovineHD0100022788	78620073	2	0.1429	0.2156	1	0.479	0.6062		1	BovineHD0100022788	2	1	DOM	4/10	101/161	0.5777		1	BovineHD0100022788	2	1	REC	0/14	12/250	1
1	ARS-BFGL-NGS-111725	78685368	1	0.4286	0.2362	2	0.03947	2.426		1	ARS-BFGL-NGS-111725	1	2	DOM	11/3	116/155	0.01159		1	ARS-BFGL-NGS-111725	1	2	REC	1/13	12/259	0.488
1	ARS-BFGL-NGS-25522	78735491	1	0.1429	0.2454	2	0.2626	0.5125		1	ARS-BFGL-NGS-25522	1	2	DOM	4/10	119/152	0.2857		1	ARS-BFGL-NGS-25522	1	2	REC	0/14	14/257	1
1	BovineHD0100022839	78771750	1	0.1071	0.1203	2	1	0.8775		1	BovineHD0100022839	1	2	DOM	3/11	59/207	1		1	BovineHD0100022839	1	2	REC	0/14	5/261	1
1	BTB-00034294	78909030	1	0.3929	0.262	2	0.1309	1.823		1	BTB-00034294	1	2	DOM	10/4	123/148	0.0962		1	BTB-00034294	1	2	REC	1/13	19/252	1
1	BovineHD0100022901	78991936	1	0.4286	0.2928	2	0.1401	1.812		1	BovineHD0100022901	1	2	DOM	11/3	131/132	0.05232		1	BovineHD0100022901	1	2	REC	1/13	23/240	1
1	Hapmap51218-BTA-36630	79040221	1	0.3214	0.4225	2	0.3306	0.6474		1	Hapmap51218-BTA-36630	1	2	DOM	9/5	184/87	0.7748		1	Hapmap51218-BTA-36630	1	2	REC	0/14	45/226	0.1368
1	BovineHD0100022920	79076444	1	0.3929	0.4275	2	0.8452	0.8665		1	BovineHD0100022920	1	2	DOM	9/5	184/85	0.7722		1	BovineHD0100022920	1	2	REC	2/12	46/223	1
1	BTB-00034202	79082187	2	0.3214	0.1444	1	0.02583	2.806		1	BTB-00034202	2	1	DOM	9/5	74/196	0.005648		1	BTB-00034202	2	1	REC	0/14	4/266	1
1	Hapmap49586-BTA-36632	79111744	1	0.25	0.3376	2	0.414	0.6539		1	Hapmap49586-BTA-36632	1	2	DOM	7/7	157/114	0.5888		1	Hapmap49586-BTA-36632	1	2	REC	0/14	26/245	0.6249
1	ARS-BFGL-NGS-106728	79166288	1	0.1786	0.3093	2	0.2044	0.4856		1	ARS-BFGL-NGS-106728	1	2	DOM	5/9	144/126	0.2734		1	ARS-BFGL-NGS-106728	1	2	REC	0/14	23/247	0.6134
1	ARS-BFGL-NGS-24966	79190806	2	0.3571	0.1642	1	0.01753	2.828		1	ARS-BFGL-NGS-24966	2	1	DOM	10/4	83/188	0.0027		1	ARS-BFGL-NGS-24966	2	1	REC	0/14	6/265	1
1	BovineHD0100022969	79235157	2	0.2857	0.3954	1	0.3208	0.6115		1	BovineHD0100022969	2	1	DOM	7/7	165/98	0.4003		1	BovineHD0100022969	2	1	REC	1/13	43/220	0.7052
1	BovineHD0100022979	79266686	2	0.5714	0.464	1	0.332	1.54		1	BovineHD0100022979	2	1	DOM	11/3	185/79	0.7642		1	BovineHD0100022979	2	1	REC	5/9	60/204	0.3279
1	ARS-BFGL-NGS-113198	79291931	2	0.1429	0.1292	1	0.7744	1.124		1	ARS-BFGL-NGS-113198	2	1	DOM	4/10	64/207	0.748		1	ARS-BFGL-NGS-113198	2	1	REC	0/14	6/265	1
1	Hapmap51438-BTA-37566	79315052	1	0.4286	0.4963	2	0.5629	0.7612		1	Hapmap51438-BTA-37566	1	2	DOM	9/5	200/71	0.5349		1	Hapmap51438-BTA-37566	1	2	REC	3/11	69/202	1
1	BovineHD0100023005	79357690	1	0.3214	0.4447	2	0.2427	0.5916		1	BovineHD0100023005	1	2	DOM	8/6	182/80	0.3777		1	BovineHD0100023005	1	2	REC	1/13	51/211	0.4802
1	BTB-00036018	79428743	1	0.25	0.3506	2	0.3146	0.6175		1	BTB-00036018	1	2	DOM	7/7	160/111	0.5822		1	BTB-00036018	1	2	REC	0/14	30/241	0.3753
1	ARS-BFGL-NGS-100951	79472403	2	0.5	0.4686	1	0.8467	1.134		1	ARS-BFGL-NGS-100951	2	1	DOM	10/4	202/69	0.7594		1	ARS-BFGL-NGS-100951	2	1	REC	4/10	52/219	0.4866
1	BovineHD0100023038	79495073	1	0.2857	0.1992	2	0.3324	1.608		1	BovineHD0100023038	1	2	DOM	7/7	94/167	0.3937		1	BovineHD0100023038	1	2	REC	1/13	10/251	0.4433
1	BovineHD0100023042	79510270	2	0.1071	0.1	1	0.7535	1.08		1	BovineHD0100023042	2	1	DOM	3/11	47/213	0.7251		1	BovineHD0100023042	2	1	REC	0/14	5/255	1
1	BTA-37567-no-rs	79513248	2	0.5714	0.3432	1	0.02391	2.552		1	BTA-37567-no-rs	2	1	DOM	12/2	153/118	0.04842		1	BTA-37567-no-rs	2	1	REC	4/10	33/238	0.09237
1	Hapmap41250-BTA-38429	79548115	2	0.1429	0.2741	1	0.187	0.4414		1	Hapmap41250-BTA-38429	2	1	DOM	4/10	129/141	0.1812		1	Hapmap41250-BTA-38429	2	1	REC	0/14	19/251	0.609
1	BovineHD0100023059	79572795	1	0.2857	0.417	2	0.2364	0.5593		1	BovineHD0100023059	1	2	DOM	7/7	176/89	0.2506		1	BovineHD0100023059	1	2	REC	1/13	45/220	0.4785
1	BovineHD0100023067	79605572	1	0.5357	0.459	2	0.4436	1.36		1	BovineHD0100023067	1	2	DOM	11/3	196/72	0.7666		1	BovineHD0100023067	1	2	REC	4/10	50/218	0.3168
1	BovineHD0100023079	79639732	2	0.5	0.4316	1	0.5585	1.317		1	BovineHD0100023079	2	1	DOM	11/3	183/80	0.5645		1	BovineHD0100023079	2	1	REC	3/11	44/219	0.7128
1	BovineHD0100023116	79756204	2	0.4643	0.3657	1	0.3187	1.503		1	BovineHD0100023116	2	1	DOM	9/5	166/102	1		1	BovineHD0100023116	2	1	REC	4/10	30/238	0.07338
1	BTB-00036138	79757250	2	0.3929	0.19	1	0.01433	2.758		1	BTB-00036138	2	1	DOM	10/4	95/176	0.009039		1	BTB-00036138	2	1	REC	1/13	8/263	0.3687
1	Hapmap50131-BTA-85559	79835571	2	0.1786	0.1716	1	1	1.05		1	Hapmap50131-BTA-85559	2	1	DOM	4/10	84/187	1		1	Hapmap50131-BTA-85559	2	1	REC	1/13	9/262	0.4007
1	BovineHD0100023133	79858270	1	0.25	0.25	2	1	1		1	BovineHD0100023133	1	2	DOM	6/8	115/149	1		1	BovineHD0100023133	1	2	REC	1/13	17/247	1
1	BovineHD0100023142	79916138	1	0.5357	0.479	2	0.5677	1.255		1	BovineHD0100023142	1	2	DOM	11/3	193/69	1		1	BovineHD0100023142	1	2	REC	4/10	58/204	0.5246
1	BovineHD0100023146	79938242	2	0.6071	0.3712	1	0.01605	2.618		1	BovineHD0100023146	2	1	DOM	14/0	159/105	0.001294		1	BovineHD0100023146	2	1	REC	3/11	37/227	0.4333
1	ARS-BFGL-NGS-19741	79957893	1	0.2143	0.3303	2	0.2224	0.5531		1	ARS-BFGL-NGS-19741	1	2	DOM	6/8	154/117	0.4089		1	ARS-BFGL-NGS-19741	1	2	REC	0/14	25/246	0.6204
1	BovineHD0100023165	79990596	2	0.1786	0.322	1	0.1437	0.4578		1	BovineHD0100023165	2	1	DOM	5/9	146/118	0.1761		1	BovineHD0100023165	2	1	REC	0/14	24/240	0.6185
1	ARS-BFGL-NGS-1514	80021446	1	0.2143	0.2399	2	1	0.8643		1	ARS-BFGL-NGS-1514	1	2	DOM	5/9	115/156	0.7834		1	ARS-BFGL-NGS-1514	1	2	REC	1/13	15/256	0.5633
1	BovineHD0100023182	80037828	2	0.6786	0.4639	1	0.0322	2.44		1	BovineHD0100023182	2	1	DOM	14/0	191/72	0.02426		1	BovineHD0100023182	2	1	REC	5/9	53/210	0.1793
1	BovineHD0100023186	80051299	1	0.5357	0.3926	2	0.1656	1.785		1	BovineHD0100023186	1	2	DOM	10/4	175/95	0.7768		1	BovineHD0100023186	1	2	REC	5/9	37/233	0.0401
1	BovineHD0100023190	80065210	1	0.3214	0.3234	2	1	0.9909		1	BovineHD0100023190	1	2	DOM	6/8	149/120	0.4158		1	BovineHD0100023190	1	2	REC	3/11	25/244	0.1503
1	ARS-BFGL-NGS-79990	80070890	2	0.1786	0.2491	1	0.5031	0.6554		1	ARS-BFGL-NGS-79990	2	1	DOM	5/9	117/154	0.7831		1	ARS-BFGL-NGS-79990	2	1	REC	0/14	18/253	1
1	BovineHD0100023210	80108636	2	0.25	0.3657	1	0.2337	0.5782		1	BovineHD0100023210	2	1	DOM	7/7	159/109	0.5808		1	BovineHD0100023210	2	1	REC	0/14	37/231	0.228
1	BovineHD0100023217	80140528	1	0.4643	0.2752	2	0.05022	2.283		1	BovineHD0100023217	1	2	DOM	13/1	127/131	0.001505		1	BovineHD0100023217	1	2	REC	0/14	15/243	1
1	BovineHD0100023223	80185391	1	0.1429	0.2434	2	0.2634	0.5179		1	BovineHD0100023223	1	2	DOM	4/10	114/153	0.4078		1	BovineHD0100023223	1	2	REC	0/14	16/251	1
1	BovineHD0100023235	80224613	2	0.4643	0.2708	1	0.03186	2.333		1	BovineHD0100023235	2	1	DOM	13/1	128/136	0.001444		1	BovineHD0100023235	2	1	REC	0/14	15/249	1
1	BTA-38441-no-rs	80284430	1	0.6071	0.4188	2	0.07617	2.145		1	BTA-38441-no-rs	1	2	DOM	14/0	183/88	0.00655		1	BTA-38441-no-rs	1	2	REC	3/11	44/227	0.7093
[truncated: 71,676 more rows]
