# Supplementary material for: Genome-wide association analyses in dairy heifers highlight genes overlapping with mouse and human fertility and human health traits
Source: Research Square preprint supplement (doi:10.21203/rs.3.rs-6463477/v1), 2025-05-05
Supplement: Supplementary file 7 [file a36e21cf0ad862cc74f58104.xlsx]

## Sheet: Supplementary table S5
Additional file 7. Variant annotation using Ensembl Variant Effect Predictor.
#Uploaded_variation	Location	Allele	Consequence	IMPACT	SYMBOL	Gene	Feature_type	Feature	BIOTYPE	EXON	INTRON	HGVSc	HGVSp	cDNA_position	CDS_position	Protein_position	Amino_acids	Codons	Existing_variation	REF_ALLELE	UPLOADED_ALLELE	DISTANCE	STRAND	FLAGS	SYMBOL_SOURCE	HGNC_ID	MANE	MANE_SELECT	MANE_PLUS_CLINICAL	TSL	APPRIS	SIFT	MOTIF_NAME	MOTIF_POS	HIGH_INF_POS	MOTIF_SCORE_CHANGE	TRANSCRIPTION_FACTORS	PHENOTYPES	5UTR_annotation	5UTR_consequence	Existing_InFrame_oORFs	Existing_OutOfFrame_oORFs	Existing_uORFs
rs110933273	1:5979118-5979118	T	intergenic_variant	MODIFIER	-	-	-	-	-	-	-	-	-	-	-	-	-	-	-	C	C/T	-	-	-	-	-	-	-	-	-	-	-	-	-	-	-	-	-	-	-	-	-	-
rs43713002	1:33560583-33560583	A	intergenic_variant	MODIFIER	-	-	-	-	-	-	-	-	-	-	-	-	-	-	-	G	G/A	-	-	-	-	-	-	-	-	-	-	-	-	-	-	-	-	-	-	-	-	-	-
rs41657683	1:60006646-60006646	C	downstream_gene_variant	MODIFIER	-	ENSBTAG00000067098	Transcript	ENSBTAT00000099280	lncRNA	-	-	-	-	-	-	-	-	-	-	T	T/C	7476	-1	-	-	-	-	-	-	-	-	-	-	-	-	-	-	-	-	-	-	-	-
rs41657683	1:60006646-60006646	C	intron_variant,non_coding_transcript_variant	MODIFIER	-	ENSBTAG00000066968	Transcript	ENSBTAT00000099697	lncRNA	-	4/6	-	-	-	-	-	-	-	-	T	T/C	-	-1	-	-	-	-	-	-	-	-	-	-	-	-	-	-	-	-	-	-	-	-
rs41657683	1:60006646-60006646	C	intron_variant,non_coding_transcript_variant	MODIFIER	-	ENSBTAG00000066968	Transcript	ENSBTAT00000115904	lncRNA	-	3/5	-	-	-	-	-	-	-	-	T	T/C	-	-1	-	-	-	-	-	-	-	-	-	-	-	-	-	-	-	-	-	-	-	-
rs110324045	1:60831984-60831984	T	intron_variant	MODIFIER	LSAMP	ENSBTAG00000055835	Transcript	ENSBTAT00000066671	protein_coding	-	1/6	-	-	-	-	-	-	-	-	C	C/T	-	-1	-	EntrezGene	-	-	-	-	-	-	-	-	-	-	-	-	-	-	-	-	-	-
rs110324045	1:60831984-60831984	T	intron_variant	MODIFIER	LSAMP	ENSBTAG00000049383	Transcript	ENSBTAT00000072462	protein_coding	-	2/7	-	-	-	-	-	-	-	-	C	C/T	-	-1	-	VGNC	-	-	-	-	-	-	-	-	-	-	-	-	-	-	-	-	-	-
rs110324045	1:60831984-60831984	T	intron_variant	MODIFIER	LSAMP	ENSBTAG00000055835	Transcript	ENSBTAT00000085582	protein_coding	-	1/8	-	-	-	-	-	-	-	-	C	C/T	-	-1	-	EntrezGene	-	-	-	-	-	A1	-	-	-	-	-	-	-	-	-	-	-	-
rs110324045	1:60831984-60831984	T	intron_variant	MODIFIER	LSAMP	ENSBTAG00000055835	Transcript	ENSBTAT00000109014	protein_coding	-	1/6	-	-	-	-	-	-	-	-	C	C/T	-	-1	-	EntrezGene	-	-	-	-	-	P4	-	-	-	-	-	-	-	-	-	-	-	-
rs110324045	1:60831984-60831984	T	intron_variant	MODIFIER	LSAMP	ENSBTAG00000055835	Transcript	ENSBTAT00000118661	protein_coding	-	1/7	-	-	-	-	-	-	-	-	C	C/T	-	-1	-	EntrezGene	-	-	-	-	-	A1	-	-	-	-	-	-	-	-	-	-	-	-
rs110324045	1:60831984-60831984	T	intron_variant	MODIFIER	LSAMP	ENSBTAG00000055835	Transcript	ENSBTAT00000127260	protein_coding	-	2/7	-	-	-	-	-	-	-	-	C	C/T	-	-1	-	EntrezGene	-	-	-	-	-	-	-	-	-	-	-	-	-	-	-	-	-	-
rs110324045	1:60831984-60831984	T	intron_variant	MODIFIER	LSAMP	ENSBTAG00000049383	Transcript	ENSBTAT00000135803	protein_coding	-	1/6	-	-	-	-	-	-	-	-	C	C/T	-	-1	-	VGNC	-	-	-	-	-	P1	-	-	-	-	-	-	-	-	-	-	-	-
rs110438172	1:61629350-61629350	T	intergenic_variant	MODIFIER	-	-	-	-	-	-	-	-	-	-	-	-	-	-	-	C	C/T	-	-	-	-	-	-	-	-	-	-	-	-	-	-	-	-	-	-	-	-	-	-
rs3423111627	1:61774550-61774550	C	intergenic_variant	MODIFIER	-	-	-	-	-	-	-	-	-	-	-	-	-	-	-	A	A/C	-	-	-	-	-	-	-	-	-	-	-	-	-	-	-	-	-	-	-	-	-	-
rs3423111611	1:61817159-61817159	A	intergenic_variant	MODIFIER	-	-	-	-	-	-	-	-	-	-	-	-	-	-	-	G	G/A	-	-	-	-	-	-	-	-	-	-	-	-	-	-	-	-	-	-	-	-	-	-
rs41570239	1:62768510-62768510	A	intergenic_variant	MODIFIER	-	-	-	-	-	-	-	-	-	-	-	-	-	-	-	G	G/A	-	-	-	-	-	-	-	-	-	-	-	-	-	-	-	-	-	-	-	-	-	-
rs43767288	1:63716985-63716985	C	intergenic_variant	MODIFIER	-	-	-	-	-	-	-	-	-	-	-	-	-	-	-	T	T/C	-	-	-	-	-	-	-	-	-	-	-	-	-	-	-	-	-	-	-	-	-	-
rs133231177	1:65366689-65366689	A	intron_variant	MODIFIER	HGD	ENSBTAG00000015895	Transcript	ENSBTAT00000061425	protein_coding	-	4/13	-	-	-	-	-	-	-	-	C	C/A	-	-1	-	VGNC	-	-	-	-	-	P1	-	-	-	-	-	-	-	-	-	-	-	-
rs133231177	1:65366689-65366689	A	intron_variant	MODIFIER	HGD	ENSBTAG00000015895	Transcript	ENSBTAT00000079549	protein_coding	-	4/13	-	-	-	-	-	-	-	-	C	C/A	-	-1	-	VGNC	-	-	-	-	-	-	-	-	-	-	-	-	-	-	-	-	-	-
rs133231177	1:65366689-65366689	A	intron_variant	MODIFIER	HGD	ENSBTAG00000015895	Transcript	ENSBTAT00000087453	protein_coding	-	3/11	-	-	-	-	-	-	-	-	C	C/A	-	-1	-	VGNC	-	-	-	-	-	-	-	-	-	-	-	-	-	-	-	-	-	-
rs133231177	1:65366689-65366689	A	intron_variant	MODIFIER	HGD	ENSBTAG00000015895	Transcript	ENSBTAT00000110464	protein_coding	-	4/12	-	-	-	-	-	-	-	-	C	C/A	-	-1	-	VGNC	-	-	-	-	-	-	-	-	-	-	-	-	-	-	-	-	-	-
rs29019349	1:66862192-66862192	A	downstream_gene_variant	MODIFIER	FAM162A	ENSBTAG00000011140	Transcript	ENSBTAT00000014796	protein_coding	-	-	-	-	-	-	-	-	-	-	T	T/A	697	1	-	VGNC	-	-	-	-	-	P1	-	-	-	-	-	-	Bovine_respiratory_disease_susceptibility+Animal_QTLdb+159986,Bovine_respiratory_disease_susceptibility+Animal_QTLdb+159987	-	-	-	-	-
rs29019349	1:66862192-66862192	A	downstream_gene_variant	MODIFIER	WDR5B	ENSBTAG00000054326	Transcript	ENSBTAT00000071769	protein_coding	-	-	-	-	-	-	-	-	-	-	T	T/A	1823	-1	-	VGNC	-	-	-	-	-	-	-	-	-	-	-	-	Bovine_respiratory_disease_susceptibility+Animal_QTLdb+159986,Bovine_respiratory_disease_susceptibility+Animal_QTLdb+159987	-	-	-	-	-
rs29019349	1:66862192-66862192	A	downstream_gene_variant	MODIFIER	FAM162A	ENSBTAG00000011140	Transcript	ENSBTAT00000096604	protein_coding	-	-	-	-	-	-	-	-	-	-	T	T/A	3461	1	-	VGNC	-	-	-	-	-	-	-	-	-	-	-	-	Bovine_respiratory_disease_susceptibility+Animal_QTLdb+159986,Bovine_respiratory_disease_susceptibility+Animal_QTLdb+159987	-	-	-	-	-
rs29019349	1:66862192-66862192	A	downstream_gene_variant	MODIFIER	WDR5B	ENSBTAG00000054326	Transcript	ENSBTAT00000113503	protein_coding	-	-	-	-	-	-	-	-	-	-	T	T/A	830	-1	-	VGNC	-	-	-	-	-	P1	-	-	-	-	-	-	Bovine_respiratory_disease_susceptibility+Animal_QTLdb+159986,Bovine_respiratory_disease_susceptibility+Animal_QTLdb+159987	-	-	-	-	-
rs29019349	1:66862192-66862192	A	downstream_gene_variant	MODIFIER	FAM162A	ENSBTAG00000011140	Transcript	ENSBTAT00000124248	protein_coding	-	-	-	-	-	-	-	-	-	-	T	T/A	697	1	-	VGNC	-	-	-	-	-	-	-	-	-	-	-	-	Bovine_respiratory_disease_susceptibility+Animal_QTLdb+159986,Bovine_respiratory_disease_susceptibility+Animal_QTLdb+159987	-	-	-	-	-
rs43242536	1:66890930-66890930	A	intron_variant	MODIFIER	KPNA1	ENSBTAG00000011143	Transcript	ENSBTAT00000014799	protein_coding	-	9/13	-	-	-	-	-	-	-	-	G	G/A	-	-1	-	VGNC	-	-	-	-	-	P1	-	-	-	-	-	-	Digital_dermatitis+Animal_QTLdb+220880	-	-	-	-	-
rs43242536	1:66890930-66890930	A	intron_variant	MODIFIER	KPNA1	ENSBTAG00000011143	Transcript	ENSBTAT00000080763	protein_coding	-	10/13	-	-	-	-	-	-	-	-	G	G/A	-	-1	-	VGNC	-	-	-	-	-	-	-	-	-	-	-	-	Digital_dermatitis+Animal_QTLdb+220880	-	-	-	-	-
rs43242536	1:66890930-66890930	A	intron_variant	MODIFIER	KPNA1	ENSBTAG00000011143	Transcript	ENSBTAT00000086235	protein_coding	-	8/12	-	-	-	-	-	-	-	-	G	G/A	-	-1	-	VGNC	-	-	-	-	-	-	-	-	-	-	-	-	Digital_dermatitis+Animal_QTLdb+220880	-	-	-	-	-
rs3423093953	1:124138614-124138614	A	intergenic_variant	MODIFIER	-	-	-	-	-	-	-	-	-	-	-	-	-	-	-	G	G/A	-	-	-	-	-	-	-	-	-	-	-	-	-	-	-	-	-	-	-	-	-	-
rs43749018	1:124234169-124234169	T	intergenic_variant	MODIFIER	-	-	-	-	-	-	-	-	-	-	-	-	-	-	-	C	C/T	-	-	-	-	-	-	-	-	-	-	-	-	-	-	-	-	-	-	-	-	-	-
rs135592668	1:126950096-126950096	C	intron_variant	MODIFIER	TFDP2	ENSBTAG00000006222	Transcript	ENSBTAT00000008169	protein_coding	-	2/11	-	-	-	-	-	-	-	-	T	T/C	-	1	-	VGNC	-	-	-	-	-	-	-	-	-	-	-	-	-	-	-	-	-	-
rs135592668	1:126950096-126950096	C	upstream_gene_variant	MODIFIER	TFDP2	ENSBTAG00000006222	Transcript	ENSBTAT00000008170	protein_coding	-	-	-	-	-	-	-	-	-	-	T	T/C	6595	1	-	VGNC	-	-	-	-	-	A1	-	-	-	-	-	-	-	-	-	-	-	-
rs135592668	1:126950096-126950096	C	intron_variant	MODIFIER	TFDP2	ENSBTAG00000006222	Transcript	ENSBTAT00000076561	protein_coding	-	4/13	-	-	-	-	-	-	-	-	T	T/C	-	1	-	VGNC	-	-	-	-	-	-	-	-	-	-	-	-	-	-	-	-	-	-
rs135592668	1:126950096-126950096	C	intron_variant	MODIFIER	TFDP2	ENSBTAG00000006222	Transcript	ENSBTAT00000086058	protein_coding	-	2/11	-	-	-	-	-	-	-	-	T	T/C	-	1	-	VGNC	-	-	-	-	-	-	-	-	-	-	-	-	-	-	-	-	-	-
rs135592668	1:126950096-126950096	C	intron_variant	MODIFIER	TFDP2	ENSBTAG00000006222	Transcript	ENSBTAT00000102996	protein_coding	-	4/12	-	-	-	-	-	-	-	-	T	T/C	-	1	-	VGNC	-	-	-	-	-	-	-	-	-	-	-	-	-	-	-	-	-	-
rs135592668	1:126950096-126950096	C	upstream_gene_variant	MODIFIER	TFDP2	ENSBTAG00000006222	Transcript	ENSBTAT00000105582	protein_coding	-	-	-	-	-	-	-	-	-	-	T	T/C	5592	1	-	VGNC	-	-	-	-	-	-	-	-	-	-	-	-	-	-	-	-	-	-
rs135592668	1:126950096-126950096	C	intron_variant	MODIFIER	TFDP2	ENSBTAG00000006222	Transcript	ENSBTAT00000117205	protein_coding	-	4/13	-	-	-	-	-	-	-	-	T	T/C	-	1	-	VGNC	-	-	-	-	-	-	-	-	-	-	-	-	-	-	-	-	-	-
rs135592668	1:126950096-126950096	C	upstream_gene_variant	MODIFIER	TFDP2	ENSBTAG00000006222	Transcript	ENSBTAT00000126363	protein_coding	-	-	-	-	-	-	-	-	-	-	T	T/C	7405	1	-	VGNC	-	-	-	-	-	-	-	-	-	-	-	-	-	-	-	-	-	-
rs135592668	1:126950096-126950096	C	intron_variant	MODIFIER	TFDP2	ENSBTAG00000006222	Transcript	ENSBTAT00000130508	protein_coding	-	4/12	-	-	-	-	-	-	-	-	T	T/C	-	1	-	VGNC	-	-	-	-	-	-	-	-	-	-	-	-	-	-	-	-	-	-
rs135999525	1:134179453-134179453	C	intron_variant	MODIFIER	EPHB1	ENSBTAG00000015377	Transcript	ENSBTAT00000020455	protein_coding	-	9/15	-	-	-	-	-	-	-	-	T	T/C	-	-1	-	VGNC	-	-	-	-	-	P1	-	-	-	-	-	-	-	-	-	-	-	-
rs135999525	1:134179453-134179453	C	intron_variant	MODIFIER	EPHB1	ENSBTAG00000015377	Transcript	ENSBTAT00000093599	protein_coding	-	8/14	-	-	-	-	-	-	-	-	T	T/C	-	-1	-	VGNC	-	-	-	-	-	-	-	-	-	-	-	-	-	-	-	-	-	-
rs135999525	1:134179453-134179453	C	intron_variant	MODIFIER	EPHB1	ENSBTAG00000015377	Transcript	ENSBTAT00000094091	protein_coding	-	7/13	-	-	-	-	-	-	-	-	T	T/C	-	-1	-	VGNC	-	-	-	-	-	-	-	-	-	-	-	-	-	-	-	-	-	-
rs133698224	1:139555009-139555009	T	intron_variant	MODIFIER	SH3BGR	ENSBTAG00000007068	Transcript	ENSBTAT00000036848	protein_coding	-	3/7	-	-	-	-	-	-	-	-	C	C/T	-	1	-	VGNC	-	-	-	-	-	P1	-	-	-	-	-	-	-	-	-	-	-	-
rs133698224	1:139555009-139555009	T	intron_variant	MODIFIER	SH3BGR	ENSBTAG00000007068	Transcript	ENSBTAT00000087811	protein_coding	-	3/7	-	-	-	-	-	-	-	-	C	C/T	-	1	-	VGNC	-	-	-	-	-	-	-	-	-	-	-	-	-	-	-	-	-	-
rs133410098	1:150360069-150360069	G	downstream_gene_variant	MODIFIER	SNORA72	ENSBTAG00000042581	Transcript	ENSBTAT00000059573	snoRNA	-	-	-	-	-	-	-	-	-	-	A	A/G	6083	-1	-	RFAM	-	-	-	-	-	-	-	-	-	-	-	-	-	-	-	-	-	-
rs109117962	1:151120755-151120755	A	intron_variant	MODIFIER	-	ENSBTAG00000062375	Transcript	ENSBTAT00000095432	protein_coding	-	2/2	-	-	-	-	-	-	-	-	G	G/A	-	1	-	-	-	-	-	-	-	P1	-	-	-	-	-	-	Milk_yield+Animal_QTLdb+25392,Milk_protein_percentage+Animal_QTLdb+26723	-	-	-	-	-
rs109117962	1:151120755-151120755	A	upstream_gene_variant	MODIFIER	-	ENSBTAG00000057017	Transcript	ENSBTAT00000104037	lncRNA	-	-	-	-	-	-	-	-	-	-	G	G/A	6561	-1	-	-	-	-	-	-	-	-	-	-	-	-	-	-	Milk_yield+Animal_QTLdb+25392,Milk_protein_percentage+Animal_QTLdb+26723	-	-	-	-	-
rs137700356	1:151164011-151164011	A	upstream_gene_variant	MODIFIER	ETS2	ENSBTAG00000009214	Transcript	ENSBTAT00000012144	protein_coding	-	-	-	-	-	-	-	-	-	-	G	G/A	6804	1	-	VGNC	-	-	-	-	-	-	-	-	-	-	-	-	-	-	-	-	-	-
rs137700356	1:151164011-151164011	A	intron_variant	MODIFIER	ETS2	ENSBTAG00000009214	Transcript	ENSBTAT00000074510	protein_coding	-	2/10	-	-	-	-	-	-	-	-	G	G/A	-	1	-	VGNC	-	-	-	-	-	P1	-	-	-	-	-	-	-	-	-	-	-	-
rs43283023	1:155471297-155471297	A	intron_variant	MODIFIER	SATB1	ENSBTAG00000021158	Transcript	ENSBTAT00000028199	protein_coding	-	8/10	-	-	-	-	-	-	-	-	G	G/A	-	-1	-	VGNC	-	-	-	-	-	P1	-	-	-	-	-	-	-	-	-	-	-	-
rs41658634	10:14415124-14415124	A	intron_variant	MODIFIER	MAP2K5	ENSBTAG00000000218	Transcript	ENSBTAT00000000265	protein_coding	-	3/22	-	-	-	-	-	-	-	-	G	G/A	-	1	-	VGNC	-	-	-	-	-	-	-	-	-	-	-	-	-	-	-	-	-	-
rs41658634	10:14415124-14415124	A	intron_variant	MODIFIER	MAP2K5	ENSBTAG00000000218	Transcript	ENSBTAT00000079507	protein_coding	-	3/21	-	-	-	-	-	-	-	-	G	G/A	-	1	-	VGNC	-	-	-	-	-	-	-	-	-	-	-	-	-	-	-	-	-	-
rs41658634	10:14415124-14415124	A	intron_variant	MODIFIER	MAP2K5	ENSBTAG00000000218	Transcript	ENSBTAT00000091402	protein_coding	-	3/19	-	-	-	-	-	-	-	-	G	G/A	-	1	-	VGNC	-	-	-	-	-	-	-	-	-	-	-	-	-	-	-	-	-	-
rs41658634	10:14415124-14415124	A	intron_variant	MODIFIER	MAP2K5	ENSBTAG00000000218	Transcript	ENSBTAT00000104825	protein_coding	-	3/18	-	-	-	-	-	-	-	-	G	G/A	-	1	-	VGNC	-	-	-	-	-	-	-	-	-	-	-	-	-	-	-	-	-	-
rs41658634	10:14415124-14415124	A	intron_variant	MODIFIER	MAP2K5	ENSBTAG00000000218	Transcript	ENSBTAT00000106465	protein_coding	-	3/21	-	-	-	-	-	-	-	-	G	G/A	-	1	-	VGNC	-	-	-	-	-	-	-	-	-	-	-	-	-	-	-	-	-	-
rs41658634	10:14415124-14415124	A	intron_variant	MODIFIER	MAP2K5	ENSBTAG00000000218	Transcript	ENSBTAT00000111593	protein_coding	-	3/17	-	-	-	-	-	-	-	-	G	G/A	-	1	-	VGNC	-	-	-	-	-	-	-	-	-	-	-	-	-	-	-	-	-	-
rs41658634	10:14415124-14415124	A	intron_variant	MODIFIER	MAP2K5	ENSBTAG00000000218	Transcript	ENSBTAT00000126304	protein_coding	-	3/19	-	-	-	-	-	-	-	-	G	G/A	-	1	-	VGNC	-	-	-	-	-	-	-	-	-	-	-	-	-	-	-	-	-	-
rs41658634	10:14415124-14415124	A	intron_variant	MODIFIER	MAP2K5	ENSBTAG00000000218	Transcript	ENSBTAT00000126760	protein_coding	-	3/20	-	-	-	-	-	-	-	-	G	G/A	-	1	-	VGNC	-	-	-	-	-	P1	-	-	-	-	-	-	-	-	-	-	-	-
rs41658634	10:14415124-14415124	A	intron_variant	MODIFIER	MAP2K5	ENSBTAG00000000218	Transcript	ENSBTAT00000134497	protein_coding	-	3/20	-	-	-	-	-	-	-	-	G	G/A	-	1	-	VGNC	-	-	-	-	-	-	-	-	-	-	-	-	-	-	-	-	-	-
rs3423093513	10:15551922-15551922	A	intron_variant	MODIFIER	CORO2B	ENSBTAG00000012681	Transcript	ENSBTAT00000016845	protein_coding	-	3/11	-	-	-	-	-	-	-	-	G	G/A	-	1	-	VGNC	-	-	-	-	-	P4	-	-	-	-	-	-	-	-	-	-	-	-
rs3423093513	10:15551922-15551922	A	intron_variant	MODIFIER	CORO2B	ENSBTAG00000012681	Transcript	ENSBTAT00000070596	protein_coding	-	3/11	-	-	-	-	-	-	-	-	G	G/A	-	1	-	VGNC	-	-	-	-	-	-	-	-	-	-	-	-	-	-	-	-	-	-
rs3423093513	10:15551922-15551922	A	intron_variant	MODIFIER	CORO2B	ENSBTAG00000012681	Transcript	ENSBTAT00000080431	protein_coding	-	4/12	-	-	-	-	-	-	-	-	G	G/A	-	1	-	VGNC	-	-	-	-	-	-	-	-	-	-	-	-	-	-	-	-	-	-
rs3423093513	10:15551922-15551922	A	intron_variant	MODIFIER	CORO2B	ENSBTAG00000012681	Transcript	ENSBTAT00000129039	protein_coding	-	3/11	-	-	-	-	-	-	-	-	G	G/A	-	1	-	VGNC	-	-	-	-	-	A1	-	-	-	-	-	-	-	-	-	-	-	-
rs43741350	11:22605594-22605594	C	intron_variant	MODIFIER	SLC8A1	ENSBTAG00000013861	Transcript	ENSBTAT00000018452	protein_coding	-	2/7	-	-	-	-	-	-	-	-	T	T/C	-	-1	-	VGNC	-	-	-	-	-	-	-	-	-	-	-	-	-	-	-	-	-	-
rs43741350	11:22605594-22605594	C	intron_variant	MODIFIER	SLC8A1	ENSBTAG00000013861	Transcript	ENSBTAT00000022795	protein_coding	-	2/8	-	-	-	-	-	-	-	-	T	T/C	-	-1	-	VGNC	-	-	-	-	-	-	-	-	-	-	-	-	-	-	-	-	-	-
rs43741350	11:22605594-22605594	C	intron_variant	MODIFIER	SLC8A1	ENSBTAG00000013861	Transcript	ENSBTAT00000099552	protein_coding	-	2/7	-	-	-	-	-	-	-	-	T	T/C	-	-1	-	VGNC	-	-	-	-	-	P4	-	-	-	-	-	-	-	-	-	-	-	-
rs43741350	11:22605594-22605594	C	intron_variant	MODIFIER	SLC8A1	ENSBTAG00000013861	Transcript	ENSBTAT00000111208	protein_coding	-	2/8	-	-	-	-	-	-	-	-	T	T/C	-	-1	-	VGNC	-	-	-	-	-	A1	-	-	-	-	-	-	-	-	-	-	-	-
rs137053723	11:55314730-55314730	A	intron_variant	MODIFIER	CTNNA2	ENSBTAG00000031669	Transcript	ENSBTAT00000044898	protein_coding	-	8/8	-	-	-	-	-	-	-	-	G	G/A	-	-1	-	EntrezGene	-	-	-	-	-	-	-	-	-	-	-	-	-	-	-	-	-	-
rs137053723	11:55314730-55314730	A	intron_variant	MODIFIER	CTNNA2	ENSBTAG00000031669	Transcript	ENSBTAT00000064988	protein_coding	-	7/19	-	-	-	-	-	-	-	-	G	G/A	-	-1	-	EntrezGene	-	-	-	-	-	-	-	-	-	-	-	-	-	-	-	-	-	-
rs137053723	11:55314730-55314730	A	intron_variant	MODIFIER	CTNNA2	ENSBTAG00000031669	Transcript	ENSBTAT00000067532	protein_coding	-	7/16	-	-	-	-	-	-	-	-	G	G/A	-	-1	-	EntrezGene	-	-	-	-	-	-	-	-	-	-	-	-	-	-	-	-	-	-
rs137053723	11:55314730-55314730	A	intron_variant	MODIFIER	CTNNA2	ENSBTAG00000031669	Transcript	ENSBTAT00000088172	protein_coding	-	7/18	-	-	-	-	-	-	-	-	G	G/A	-	-1	-	EntrezGene	-	-	-	-	-	-	-	-	-	-	-	-	-	-	-	-	-	-
rs137053723	11:55314730-55314730	A	intron_variant	MODIFIER	CTNNA2	ENSBTAG00000031669	Transcript	ENSBTAT00000100523	protein_coding	-	7/17	-	-	-	-	-	-	-	-	G	G/A	-	-1	-	EntrezGene	-	-	-	-	-	P1	-	-	-	-	-	-	-	-	-	-	-	-
rs137053723	11:55314730-55314730	A	intron_variant	MODIFIER	CTNNA2	ENSBTAG00000031669	Transcript	ENSBTAT00000135605	protein_coding	-	7/18	-	-	-	-	-	-	-	-	G	G/A	-	-1	-	EntrezGene	-	-	-	-	-	-	-	-	-	-	-	-	-	-	-	-	-	-
rs134744181	12:5346137-5346137	A	intergenic_variant	MODIFIER	-	-	-	-	-	-	-	-	-	-	-	-	-	-	-	G	G/A	-	-	-	-	-	-	-	-	-	-	-	-	-	-	-	-	-	-	-	-	-	-
rs41581784	12:11470110-11470110	A	upstream_gene_variant	MODIFIER	MTRF1	ENSBTAG00000012260	Transcript	ENSBTAT00000016261	protein_coding	-	-	-	-	-	-	-	-	-	-	G	G/A	9841	-1	-	VGNC	-	-	-	-	-	A2	-	-	-	-	-	-	-	-	-	-	-	-
rs41581784	12:11470110-11470110	A	upstream_gene_variant	MODIFIER	NAA16	ENSBTAG00000038251	Transcript	ENSBTAT00000061596	protein_coding	-	-	-	-	-	-	-	-	-	-	G	G/A	8810	1	-	VGNC	-	-	-	-	-	P1	-	-	-	-	-	-	-	-	-	-	-	-
rs41581784	12:11470110-11470110	A	upstream_gene_variant	MODIFIER	NAA16	ENSBTAG00000038251	Transcript	ENSBTAT00000068186	protein_coding	-	-	-	-	-	-	-	-	-	-	G	G/A	8810	1	-	VGNC	-	-	-	-	-	-	-	-	-	-	-	-	-	-	-	-	-	-
rs41581784	12:11470110-11470110	A	upstream_gene_variant	MODIFIER	MTRF1	ENSBTAG00000012260	Transcript	ENSBTAT00000075243	protein_coding	-	-	-	-	-	-	-	-	-	-	G	G/A	8878	-1	-	VGNC	-	-	-	-	-	P2	-	-	-	-	-	-	-	-	-	-	-	-
rs41581784	12:11470110-11470110	A	upstream_gene_variant	MODIFIER	NAA16	ENSBTAG00000038251	Transcript	ENSBTAT00000078071	protein_coding	-	-	-	-	-	-	-	-	-	-	G	G/A	8810	1	-	VGNC	-	-	-	-	-	-	-	-	-	-	-	-	-	-	-	-	-	-
rs41581784	12:11470110-11470110	A	upstream_gene_variant	MODIFIER	NAA16	ENSBTAG00000038251	Transcript	ENSBTAT00000078828	protein_coding	-	-	-	-	-	-	-	-	-	-	G	G/A	8810	1	-	VGNC	-	-	-	-	-	-	-	-	-	-	-	-	-	-	-	-	-	-
rs29012667	12:12012377-12012377	G	intron_variant	MODIFIER	VWA8	ENSBTAG00000001133	Transcript	ENSBTAT00000001508	protein_coding	-	5/39	-	-	-	-	-	-	-	-	A	A/G	-	-1	-	VGNC	-	-	-	-	-	A2	-	-	-	-	-	-	-	-	-	-	-	-
rs29012667	12:12012377-12012377	G	intron_variant	MODIFIER	VWA8	ENSBTAG00000001133	Transcript	ENSBTAT00000001513	protein_coding	-	4/43	-	-	-	-	-	-	-	-	A	A/G	-	-1	-	VGNC	-	-	-	-	-	P2	-	-	-	-	-	-	-	-	-	-	-	-
rs29012667	12:12012377-12012377	G	intron_variant	MODIFIER	VWA8	ENSBTAG00000001133	Transcript	ENSBTAT00000063788	protein_coding	-	5/44	-	-	-	-	-	-	-	-	A	A/G	-	-1	-	VGNC	-	-	-	-	-	A2	-	-	-	-	-	-	-	-	-	-	-	-
rs29012667	12:12012377-12012377	G	intron_variant	MODIFIER	VWA8	ENSBTAG00000001133	Transcript	ENSBTAT00000089429	protein_coding	-	4/43	-	-	-	-	-	-	-	-	A	A/G	-	-1	-	VGNC	-	-	-	-	-	-	-	-	-	-	-	-	-	-	-	-	-	-
rs29012667	12:12012377-12012377	G	intron_variant	MODIFIER	VWA8	ENSBTAG00000001133	Transcript	ENSBTAT00000106908	protein_coding	-	5/26	-	-	-	-	-	-	-	-	A	A/G	-	-1	-	VGNC	-	-	-	-	-	A2	-	-	-	-	-	-	-	-	-	-	-	-
rs29012667	12:12012377-12012377	G	intron_variant	MODIFIER	VWA8	ENSBTAG00000001133	Transcript	ENSBTAT00000120982	protein_coding	-	5/42	-	-	-	-	-	-	-	-	A	A/G	-	-1	-	VGNC	-	-	-	-	-	A2	-	-	-	-	-	-	-	-	-	-	-	-
rs109186505	12:12091328-12091328	C	upstream_gene_variant	MODIFIER	-	ENSBTAG00000069491	Transcript	ENSBTAT00000108201	lncRNA	-	-	-	-	-	-	-	-	-	-	T	T/C	6996	-1	-	-	-	-	-	-	-	-	-	-	-	-	-	-	-	-	-	-	-	-
rs109186505	12:12091328-12091328	C	upstream_gene_variant	MODIFIER	-	ENSBTAG00000069491	Transcript	ENSBTAT00000113881	lncRNA	-	-	-	-	-	-	-	-	-	-	T	T/C	6996	-1	-	-	-	-	-	-	-	-	-	-	-	-	-	-	-	-	-	-	-	-
rs109186505	12:12091328-12091328	C	upstream_gene_variant	MODIFIER	-	ENSBTAG00000069491	Transcript	ENSBTAT00000120993	lncRNA	-	-	-	-	-	-	-	-	-	-	T	T/C	6996	-1	-	-	-	-	-	-	-	-	-	-	-	-	-	-	-	-	-	-	-	-
rs109186505	12:12091328-12091328	C	upstream_gene_variant	MODIFIER	-	ENSBTAG00000069491	Transcript	ENSBTAT00000133242	lncRNA	-	-	-	-	-	-	-	-	-	-	T	T/C	7029	-1	-	-	-	-	-	-	-	-	-	-	-	-	-	-	-	-	-	-	-	-
rs109907807	12:12245826-12245826	T	intron_variant	MODIFIER	DGKH	ENSBTAG00000013879	Transcript	ENSBTAT00000018432	protein_coding	-	2/29	-	-	-	-	-	-	-	-	C	C/T	-	1	-	VGNC	-	-	-	-	-	-	-	-	-	-	-	-	-	-	-	-	-	-
rs109907807	12:12245826-12245826	T	intron_variant	MODIFIER	DGKH	ENSBTAG00000013879	Transcript	ENSBTAT00000114267	protein_coding	-	2/30	-	-	-	-	-	-	-	-	C	C/T	-	1	-	VGNC	-	-	-	-	-	A2	-	-	-	-	-	-	-	-	-	-	-	-
rs109907807	12:12245826-12245826	T	intron_variant	MODIFIER	DGKH	ENSBTAG00000013879	Transcript	ENSBTAT00000115086	protein_coding	-	2/30	-	-	-	-	-	-	-	-	C	C/T	-	1	-	VGNC	-	-	-	-	-	P4	-	-	-	-	-	-	-	-	-	-	-	-
rs43691605	12:12473832-12473832	A	intergenic_variant	MODIFIER	-	-	-	-	-	-	-	-	-	-	-	-	-	-	-	G	G/A	-	-	-	-	-	-	-	-	-	-	-	-	-	-	-	-	-	-	-	-	-	-
rs136890099	12:13591814-13591814	C	intron_variant	MODIFIER	ENOX1	ENSBTAG00000012434	Transcript	ENSBTAT00000016503	protein_coding	-	2/13	-	-	-	-	-	-	-	-	T	T/C	-	-1	-	VGNC	-	-	-	-	-	-	-	-	-	-	-	-	-	-	-	-	-	-
rs136890099	12:13591814-13591814	C	intron_variant	MODIFIER	ENOX1	ENSBTAG00000012434	Transcript	ENSBTAT00000105557	protein_coding	-	2/14	-	-	-	-	-	-	-	-	T	T/C	-	-1	-	VGNC	-	-	-	-	-	-	-	-	-	-	-	-	-	-	-	-	-	-
rs136890099	12:13591814-13591814	C	intron_variant	MODIFIER	ENOX1	ENSBTAG00000012434	Transcript	ENSBTAT00000117146	protein_coding	-	3/15	-	-	-	-	-	-	-	-	T	T/C	-	-1	-	VGNC	-	-	-	-	-	P1	-	-	-	-	-	-	-	-	-	-	-	-
rs136890099	12:13591814-13591814	C	intron_variant	MODIFIER	ENOX1	ENSBTAG00000012434	Transcript	ENSBTAT00000120987	protein_coding	-	2/14	-	-	-	-	-	-	-	-	T	T/C	-	-1	-	VGNC	-	-	-	-	-	-	-	-	-	-	-	-	-	-	-	-	-	-
rs41618427	12:15108440-15108440	A	downstream_gene_variant	MODIFIER	NUFIP1	ENSBTAG00000009415	Transcript	ENSBTAT00000012392	protein_coding	-	-	-	-	-	-	-	-	-	-	G	G/A	9567	-1	-	VGNC	-	-	-	-	-	P2	-	-	-	-	-	-	-	-	-	-	-	-
rs41618427	12:15108440-15108440	A	downstream_gene_variant	MODIFIER	NUFIP1	ENSBTAG00000009415	Transcript	ENSBTAT00000125168	protein_coding	-	-	-	-	-	-	-	-	-	-	G	G/A	9567	-1	-	VGNC	-	-	-	-	-	A2	-	-	-	-	-	-	-	-	-	-	-	-
rs41582571	12:16559286-16559286	G	intron_variant	MODIFIER	LRCH1	ENSBTAG00000002959	Transcript	ENSBTAT00000003856	protein_coding	-	1/19	-	-	-	-	-	-	-	-	A	A/G	-	1	-	VGNC	-	-	-	-	-	A2	-	-	-	-	-	-	-	-	-	-	-	-
rs41582571	12:16559286-16559286	G	intron_variant	MODIFIER	LRCH1	ENSBTAG00000002959	Transcript	ENSBTAT00000067507	protein_coding	-	1/18	-	-	-	-	-	-	-	-	A	A/G	-	1	-	VGNC	-	-	-	-	-	P4	-	-	-	-	-	-	-	-	-	-	-	-
rs109260058	12:35777077-35777077	G	intron_variant	MODIFIER	XPO4	ENSBTAG00000003710	Transcript	ENSBTAT00000004832	protein_coding	-	15/22	-	-	-	-	-	-	-	-	T	T/G	-	1	-	VGNC	-	-	-	-	-	P1	-	-	-	-	-	-	-	-	-	-	-	-
rs109260058	12:35777077-35777077	G	downstream_gene_variant	MODIFIER	XPO4	ENSBTAG00000003710	Transcript	ENSBTAT00000056785	protein_coding	-	-	-	-	-	-	-	-	-	-	T	T/G	5369	1	-	VGNC	-	-	-	-	-	-	-	-	-	-	-	-	-	-	-	-	-	-
rs109626146	12:80645474-80645474	T	intergenic_variant	MODIFIER	-	-	-	-	-	-	-	-	-	-	-	-	-	-	-	C	C/T	-	-	-	-	-	-	-	-	-	-	-	-	-	-	-	-	-	-	-	-	-	-
rs110620960	13:21159548-21159548	A	intron_variant	MODIFIER	MALRD1	ENSBTAG00000060007	Transcript	ENSBTAT00000094984	protein_coding	-	37/39	-	-	-	-	-	-	-	-	G	G/A	-	1	-	HGNC	HGNC:24331	-	-	-	-	P2	-	-	-	-	-	-	Rear_leg_placement_-_rear_view+Animal_QTLdb+285476	-	-	-	-	-
rs110620960	13:21159548-21159548	A	intron_variant	MODIFIER	MALRD1	ENSBTAG00000060007	Transcript	ENSBTAT00000100939	protein_coding	-	37/40	-	-	-	-	-	-	-	-	G	G/A	-	1	-	HGNC	HGNC:24331	-	-	-	-	A2	-	-	-	-	-	-	Rear_leg_placement_-_rear_view+Animal_QTLdb+285476	-	-	-	-	-
rs110620960	13:21159548-21159548	A	intron_variant	MODIFIER	MALRD1	ENSBTAG00000060007	Transcript	ENSBTAT00000122607	protein_coding	-	38/41	-	-	-	-	-	-	-	-	G	G/A	-	1	-	HGNC	HGNC:24331	-	-	-	-	-	-	-	-	-	-	-	Rear_leg_placement_-_rear_view+Animal_QTLdb+285476	-	-	-	-	-
rs110620960	13:21159548-21159548	A	intron_variant	MODIFIER	MALRD1	ENSBTAG00000060007	Transcript	ENSBTAT00000133168	protein_coding	-	37/38	-	-	-	-	-	-	-	-	G	G/A	-	1	-	HGNC	HGNC:24331	-	-	-	-	-	-	-	-	-	-	-	Rear_leg_placement_-_rear_view+Animal_QTLdb+285476	-	-	-	-	-
rs29023180	13:21473454-21473454	T	intron_variant	MODIFIER	PLXDC2	ENSBTAG00000009475	Transcript	ENSBTAT00000012472	protein_coding	-	1/13	-	-	-	-	-	-	-	-	A	A/T	-	1	-	VGNC	-	-	-	-	-	-	-	-	-	-	-	-	Body_energy_content+Animal_QTLdb+20914,Body_energy_content+Animal_QTLdb+20915	-	-	-	-	-
rs29023180	13:21473454-21473454	T	intron_variant	MODIFIER	PLXDC2	ENSBTAG00000009475	Transcript	ENSBTAT00000073828	protein_coding	-	1/13	-	-	-	-	-	-	-	-	A	A/T	-	1	-	VGNC	-	-	-	-	-	P1	-	-	-	-	-	-	Body_energy_content+Animal_QTLdb+20914,Body_energy_content+Animal_QTLdb+20915	-	-	-	-	-
rs29023180	13:21473454-21473454	T	intron_variant	MODIFIER	PLXDC2	ENSBTAG00000009475	Transcript	ENSBTAT00000081379	protein_coding	-	1/12	-	-	-	-	-	-	-	-	A	A/T	-	1	-	VGNC	-	-	-	-	-	-	-	-	-	-	-	-	Body_energy_content+Animal_QTLdb+20914,Body_energy_content+Animal_QTLdb+20915	-	-	-	-	-
rs111010098	13:21720773-21720773	T	intron_variant	MODIFIER	PLXDC2	ENSBTAG00000009475	Transcript	ENSBTAT00000012472	protein_coding	-	13/13	-	-	-	-	-	-	-	-	G	G/T	-	1	-	VGNC	-	-	-	-	-	-	-	-	-	-	-	-	-	-	-	-	-	-
rs111010098	13:21720773-21720773	T	intron_variant	MODIFIER	PLXDC2	ENSBTAG00000009475	Transcript	ENSBTAT00000073828	protein_coding	-	13/13	-	-	-	-	-	-	-	-	G	G/T	-	1	-	VGNC	-	-	-	-	-	P1	-	-	-	-	-	-	-	-	-	-	-	-
rs111010098	13:21720773-21720773	T	intron_variant	MODIFIER	PLXDC2	ENSBTAG00000009475	Transcript	ENSBTAT00000081379	protein_coding	-	12/12	-	-	-	-	-	-	-	-	G	G/T	-	1	-	VGNC	-	-	-	-	-	-	-	-	-	-	-	-	-	-	-	-	-	-
rs41575449	13:22162978-22162978	C	intron_variant	MODIFIER	NEBL	ENSBTAG00000013339	Transcript	ENSBTAT00000061339	protein_coding	-	12/27	-	-	-	-	-	-	-	-	T	T/C	-	-1	-	VGNC	-	-	-	-	-	P1	-	-	-	-	-	-	Body_energy_content+Animal_QTLdb+20916	-	-	-	-	-
rs109348898	13:26372373-26372373	G	intergenic_variant	MODIFIER	-	-	-	-	-	-	-	-	-	-	-	-	-	-	-	A	A/G	-	-	-	-	-	-	-	-	-	-	-	-	-	-	-	-	-	-	-	-	-	-
rs110548459	13:28175417-28175417	A	intron_variant	MODIFIER	BEND7	ENSBTAG00000020800	Transcript	ENSBTAT00000027718	protein_coding	-	6/8	-	-	-	-	-	-	-	-	C	C/A	-	-1	-	VGNC	-	-	-	-	-	P1	-	-	-	-	-	-	-	-	-	-	-	-
rs110548459	13:28175417-28175417	A	intron_variant	MODIFIER	BEND7	ENSBTAG00000020800	Transcript	ENSBTAT00000092156	protein_coding	-	5/7	-	-	-	-	-	-	-	-	C	C/A	-	-1	-	VGNC	-	-	-	-	-	-	-	-	-	-	-	-	-	-	-	-	-	-
rs110548459	13:28175417-28175417	A	intron_variant	MODIFIER	BEND7	ENSBTAG00000020800	Transcript	ENSBTAT00000120293	protein_coding	-	6/7	-	-	-	-	-	-	-	-	C	C/A	-	-1	-	VGNC	-	-	-	-	-	-	-	-	-	-	-	-	-	-	-	-	-	-
rs133263801	13:28292060-28292060	C	intron_variant	MODIFIER	PRPF18	ENSBTAG00000017244	Transcript	ENSBTAT00000022912	protein_coding	-	1/9	-	-	-	-	-	-	-	-	T	T/C	-	1	-	VGNC	-	-	-	-	-	P4	-	-	-	-	-	-	-	-	-	-	-	-
rs133263801	13:28292060-28292060	C	intron_variant	MODIFIER	PRPF18	ENSBTAG00000017244	Transcript	ENSBTAT00000077640	protein_coding	-	1/10	-	-	-	-	-	-	-	-	T	T/C	-	1	-	VGNC	-	-	-	-	-	A1	-	-	-	-	-	-	-	-	-	-	-	-
rs133263801	13:28292060-28292060	C	downstream_gene_variant	MODIFIER	-	ENSBTAG00000069478	Transcript	ENSBTAT00000130798	lncRNA	-	-	-	-	-	-	-	-	-	-	T	T/C	9871	1	-	-	-	-	-	-	-	-	-	-	-	-	-	-	-	-	-	-	-	-
rs109193608	13:30428912-30428912	A	intergenic_variant	MODIFIER	-	-	-	-	-	-	-	-	-	-	-	-	-	-	-	C	C/A	-	-	-	-	-	-	-	-	-	-	-	-	-	-	-	-	-	-	-	-	-	-
rs110515076	13:30602429-30602429	G	intergenic_variant	MODIFIER	-	-	-	-	-	-	-	-	-	-	-	-	-	-	-	A	A/G	-	-	-	-	-	-	-	-	-	-	-	-	-	-	-	-	-	-	-	-	-	-
rs41627563	13:30636781-30636781	G	upstream_gene_variant	MODIFIER	-	ENSBTAG00000058926	Transcript	ENSBTAT00000098811	lncRNA	-	-	-	-	-	-	-	-	-	-	A	A/G	4759	1	-	-	-	-	-	-	-	-	-	-	-	-	-	-	Interval_to_first_estrus_after_calving+Animal_QTLdb+14756	-	-	-	-	-
rs41627563	13:30636781-30636781	G	upstream_gene_variant	MODIFIER	-	ENSBTAG00000058926	Transcript	ENSBTAT00000110624	lncRNA	-	-	-	-	-	-	-	-	-	-	A	A/G	5240	1	-	-	-	-	-	-	-	-	-	-	-	-	-	-	Interval_to_first_estrus_after_calving+Animal_QTLdb+14756	-	-	-	-	-
rs41627563	13:30636781-30636781	G	upstream_gene_variant	MODIFIER	-	ENSBTAG00000058926	Transcript	ENSBTAT00000119565	lncRNA	-	-	-	-	-	-	-	-	-	-	A	A/G	4700	1	-	-	-	-	-	-	-	-	-	-	-	-	-	-	Interval_to_first_estrus_after_calving+Animal_QTLdb+14756	-	-	-	-	-
rs109983109	13:32538695-32538695	G	intergenic_variant	MODIFIER	-	-	-	-	-	-	-	-	-	-	-	-	-	-	-	A	A/G	-	-	-	-	-	-	-	-	-	-	-	-	-	-	-	-	-	-	-	-	-	-
rs132987419	13:37335920-37335920	T	intergenic_variant	MODIFIER	-	-	-	-	-	-	-	-	-	-	-	-	-	-	-	G	G/T	-	-	-	-	-	-	-	-	-	-	-	-	-	-	-	-	-	-	-	-	-	-
rs110173824	13:40032414-40032414	T	intron_variant	MODIFIER	RALGAPA2	ENSBTAG00000014178	Transcript	ENSBTAT00000018848	protein_coding	-	23/38	-	-	-	-	-	-	-	-	C	C/T	-	-1	-	VGNC	-	-	-	-	-	A1	-	-	-	-	-	-	-	-	-	-	-	-
rs110173824	13:40032414-40032414	T	intron_variant	MODIFIER	RALGAPA2	ENSBTAG00000014178	Transcript	ENSBTAT00000067374	protein_coding	-	22/37	-	-	-	-	-	-	-	-	C	C/T	-	-1	-	VGNC	-	-	-	-	-	-	-	-	-	-	-	-	-	-	-	-	-	-
rs110173824	13:40032414-40032414	T	intron_variant	MODIFIER	RALGAPA2	ENSBTAG00000014178	Transcript	ENSBTAT00000070842	protein_coding	-	23/38	-	-	-	-	-	-	-	-	C	C/T	-	-1	-	VGNC	-	-	-	-	-	-	-	-	-	-	-	-	-	-	-	-	-	-
rs110173824	13:40032414-40032414	T	intron_variant	MODIFIER	RALGAPA2	ENSBTAG00000014178	Transcript	ENSBTAT00000071183	protein_coding	-	23/38	-	-	-	-	-	-	-	-	C	C/T	-	-1	-	VGNC	-	-	-	-	-	-	-	-	-	-	-	-	-	-	-	-	-	-
rs110173824	13:40032414-40032414	T	intron_variant	MODIFIER	RALGAPA2	ENSBTAG00000014178	Transcript	ENSBTAT00000079622	protein_coding	-	23/38	-	-	-	-	-	-	-	-	C	C/T	-	-1	-	VGNC	-	-	-	-	-	-	-	-	-	-	-	-	-	-	-	-	-	-
rs110173824	13:40032414-40032414	T	intron_variant	MODIFIER	RALGAPA2	ENSBTAG00000014178	Transcript	ENSBTAT00000086535	protein_coding	-	23/38	-	-	-	-	-	-	-	-	C	C/T	-	-1	-	VGNC	-	-	-	-	-	P5	-	-	-	-	-	-	-	-	-	-	-	-
rs41688462	13:42126210-42126210	T	downstream_gene_variant	MODIFIER	-	ENSBTAG00000027420	Transcript	ENSBTAT00000039366	protein_coding	-	-	-	-	-	-	-	-	-	-	C	C/T	9994	1	-	-	-	-	-	-	-	P1	-	-	-	-	-	-	-	-	-	-	-	-
rs41688462	13:42126210-42126210	T	intron_variant	MODIFIER	CST8	ENSBTAG00000032694	Transcript	ENSBTAT00000039368	protein_coding	-	3/4	-	-	-	-	-	-	-	-	C	C/T	-	1	-	VGNC	-	-	-	-	-	P1	-	-	-	-	-	-	-	-	-	-	-	-
rs3423368111	13:43433183-43433183	T	downstream_gene_variant	MODIFIER	-	ENSBTAG00000069534	Transcript	ENSBTAT00000109124	protein_coding	-	-	-	-	-	-	-	-	-	-	C	C/T	7662	1	-	-	-	-	-	-	-	P1	-	-	-	-	-	-	-	-	-	-	-	-
rs3423368111	13:43433183-43433183	T	intron_variant	MODIFIER	-	ENSBTAG00000058874	Transcript	ENSBTAT00000110907	protein_coding	-	3/4	-	-	-	-	-	-	-	-	C	C/T	-	1	-	-	-	-	-	-	-	P1	-	-	-	-	-	-	-	-	-	-	-	-
rs41585373	13:52069828-52069828	A	intron_variant	MODIFIER	UBOX5	ENSBTAG00000015379	Transcript	ENSBTAT00000020438	protein_coding	-	3/6	-	-	-	-	-	-	-	-	G	G/A	-	1	-	VGNC	-	-	-	-	-	P1	-	-	-	-	-	-	Milk_fat_yield+Animal_QTLdb+47171,Milk_yield+Animal_QTLdb+47172,Net_merit+Animal_QTLdb+47173,Milk_protein_yield+Animal_QTLdb+47174,Rear_leg_placement_-_side_view+Animal_QTLdb+47175,Strength+Animal_QTLdb+47176	-	-	-	-	-
rs41585373	13:52069828-52069828	A	intron_variant	MODIFIER	UBOX5	ENSBTAG00000015379	Transcript	ENSBTAT00000072232	protein_coding	-	3/5	-	-	-	-	-	-	-	-	G	G/A	-	1	-	VGNC	-	-	-	-	-	-	-	-	-	-	-	-	Milk_fat_yield+Animal_QTLdb+47171,Milk_yield+Animal_QTLdb+47172,Net_merit+Animal_QTLdb+47173,Milk_protein_yield+Animal_QTLdb+47174,Rear_leg_placement_-_side_view+Animal_QTLdb+47175,Strength+Animal_QTLdb+47176	-	-	-	-	-
rs133314893	13:60180672-60180672	T	intergenic_variant	MODIFIER	-	-	-	-	-	-	-	-	-	-	-	-	-	-	-	C	C/T	-	-	-	-	-	-	-	-	-	-	-	-	-	-	-	-	-	-	-	-	-	-
rs41700634	13:66817509-66817509	T	intron_variant	MODIFIER	VSTM2L	ENSBTAG00000004750	Transcript	ENSBTAT00000006235	protein_coding	-	1/3	-	-	-	-	-	-	-	-	C	C/T	-	1	-	VGNC	-	-	-	-	-	P2	-	-	-	-	-	-	-	-	-	-	-	-
rs41700634	13:66817509-66817509	T	intron_variant	MODIFIER	VSTM2L	ENSBTAG00000004750	Transcript	ENSBTAT00000098598	protein_coding	-	1/2	-	-	-	-	-	-	-	-	C	C/T	-	1	-	VGNC	-	-	-	-	-	A2	-	-	-	-	-	-	-	-	-	-	-	-
rs41700634	13:66817509-66817509	T	intron_variant	MODIFIER	VSTM2L	ENSBTAG00000004750	Transcript	ENSBTAT00000131609	protein_coding	-	1/4	-	-	-	-	-	-	-	-	C	C/T	-	1	-	VGNC	-	-	-	-	-	-	-	-	-	-	-	-	-	-	-	-	-	-
rs29025815	13:75604605-75604605	T	missense_variant	MODERATE	EYA2	ENSBTAG00000013336	Transcript	ENSBTAT00000017737	protein_coding	2/14	-	-	-	136	136	46	R/C	Cgt/Tgt	-	C	C/T	-	1	-	VGNC	-	-	-	-	-	A2	deleterious_low_confidence(0.03)	-	-	-	-	-	-	-	-	-	-	-
rs29025815	13:75604605-75604605	T	missense_variant	MODERATE	EYA2	ENSBTAG00000013336	Transcript	ENSBTAT00000086434	protein_coding	4/16	-	-	-	256	187	63	R/C	Cgt/Tgt	-	C	C/T	-	1	-	VGNC	-	-	-	-	-	A2	deleterious_low_confidence(0.02)	-	-	-	-	-	-	-	-	-	-	-
rs29025815	13:75604605-75604605	T	missense_variant	MODERATE	EYA2	ENSBTAG00000013336	Transcript	ENSBTAT00000090004	protein_coding	3/13	-	-	-	172	163	55	R/C	Cgt/Tgt	-	C	C/T	-	1	-	VGNC	-	-	-	-	-	-	deleterious_low_confidence(0.02)	-	-	-	-	-	-	-	-	-	-	-
rs29025815	13:75604605-75604605	T	missense_variant	MODERATE	EYA2	ENSBTAG00000013336	Transcript	ENSBTAT00000110582	protein_coding	4/15	-	-	-	221	187	63	R/C	Cgt/Tgt	-	C	C/T	-	1	-	VGNC	-	-	-	-	-	-	deleterious_low_confidence(0.02)	-	-	-	-	-	-	-	-	-	-	-
rs29025815	13:75604605-75604605	T	missense_variant	MODERATE	EYA2	ENSBTAG00000013336	Transcript	ENSBTAT00000123632	protein_coding	4/16	-	-	-	280	205	69	R/C	Cgt/Tgt	-	C	C/T	-	1	-	VGNC	-	-	-	-	-	P2	deleterious_low_confidence(0.02)	-	-	-	-	-	-	-	-	-	-	-
rs29025815	13:75604605-75604605	T	missense_variant	MODERATE	EYA2	ENSBTAG00000013336	Transcript	ENSBTAT00000126863	protein_coding	2/14	-	-	-	42	19	7	R/C	Cgt/Tgt	-	C	C/T	-	1	-	VGNC	-	-	-	-	-	A2	deleterious_low_confidence(0.03)	-	-	-	-	-	-	-	-	-	-	-
rs137591751	13:81238195-81238195	A	downstream_gene_variant	MODIFIER	-	ENSBTAG00000065880	Transcript	ENSBTAT00000099628	lncRNA	-	-	-	-	-	-	-	-	-	-	C	C/A	5248	-1	-	-	-	-	-	-	-	-	-	-	-	-	-	-	-	-	-	-	-	-
rs137591751	13:81238195-81238195	A	upstream_gene_variant	MODIFIER	-	ENSBTAG00000061519	Transcript	ENSBTAT00000104334	lncRNA	-	-	-	-	-	-	-	-	-	-	C	C/A	8126	1	-	-	-	-	-	-	-	-	-	-	-	-	-	-	-	-	-	-	-	-
rs137591751	13:81238195-81238195	A	downstream_gene_variant	MODIFIER	-	ENSBTAG00000065880	Transcript	ENSBTAT00000118629	lncRNA	-	-	-	-	-	-	-	-	-	-	C	C/A	8612	-1	-	-	-	-	-	-	-	-	-	-	-	-	-	-	-	-	-	-	-	-
rs137591751	13:81238195-81238195	A	upstream_gene_variant	MODIFIER	-	ENSBTAG00000061519	Transcript	ENSBTAT00000120759	lncRNA	-	-	-	-	-	-	-	-	-	-	C	C/A	4207	1	-	-	-	-	-	-	-	-	-	-	-	-	-	-	-	-	-	-	-	-
rs137591751	13:81238195-81238195	A	downstream_gene_variant	MODIFIER	-	ENSBTAG00000065880	Transcript	ENSBTAT00000121198	lncRNA	-	-	-	-	-	-	-	-	-	-	C	C/A	8582	-1	-	-	-	-	-	-	-	-	-	-	-	-	-	-	-	-	-	-	-	-
rs137591751	13:81238195-81238195	A	upstream_gene_variant	MODIFIER	-	ENSBTAG00000061519	Transcript	ENSBTAT00000126320	lncRNA	-	-	-	-	-	-	-	-	-	-	C	C/A	4746	1	-	-	-	-	-	-	-	-	-	-	-	-	-	-	-	-	-	-	-	-
rs137591751	13:81238195-81238195	A	downstream_gene_variant	MODIFIER	-	ENSBTAG00000065880	Transcript	ENSBTAT00000126544	lncRNA	-	-	-	-	-	-	-	-	-	-	C	C/A	2823	-1	-	-	-	-	-	-	-	-	-	-	-	-	-	-	-	-	-	-	-	-
rs137591751	13:81238195-81238195	A	downstream_gene_variant	MODIFIER	-	ENSBTAG00000065880	Transcript	ENSBTAT00000133084	lncRNA	-	-	-	-	-	-	-	-	-	-	C	C/A	8743	-1	-	-	-	-	-	-	-	-	-	-	-	-	-	-	-	-	-	-	-	-
rs137591751	13:81238195-81238195	A	downstream_gene_variant	MODIFIER	-	ENSBTAG00000065880	Transcript	ENSBTAT00000134023	lncRNA	-	-	-	-	-	-	-	-	-	-	C	C/A	6983	-1	-	-	-	-	-	-	-	-	-	-	-	-	-	-	-	-	-	-	-	-
rs41627470	13:81605911-81605911	C	intron_variant	MODIFIER	CYP24A1	ENSBTAG00000002765	Transcript	ENSBTAT00000003588	protein_coding	-	5/10	-	-	-	-	-	-	-	-	T	T/C	-	-1	-	VGNC	-	-	-	-	-	-	-	-	-	-	-	-	-	-	-	-	-	-
rs41627470	13:81605911-81605911	C	intron_variant	MODIFIER	CYP24A1	ENSBTAG00000002765	Transcript	ENSBTAT00000117559	protein_coding	-	5/11	-	-	-	-	-	-	-	-	T	T/C	-	-1	-	VGNC	-	-	-	-	-	P1	-	-	-	-	-	-	-	-	-	-	-	-
rs110324238	13:81646766-81646766	C	downstream_gene_variant	MODIFIER	PFDN4	ENSBTAG00000008812	Transcript	ENSBTAT00000011605	protein_coding	-	-	-	-	-	-	-	-	-	-	T	T/C	1871	1	-	VGNC	-	-	-	-	-	P1	-	-	-	-	-	-	-	-	-	-	-	-
rs110324238	13:81646766-81646766	C	downstream_gene_variant	MODIFIER	PFDN4	ENSBTAG00000008812	Transcript	ENSBTAT00000080735	protein_coding	-	-	-	-	-	-	-	-	-	-	T	T/C	1871	1	-	VGNC	-	-	-	-	-	-	-	-	-	-	-	-	-	-	-	-	-	-
rs110324238	13:81646766-81646766	C	downstream_gene_variant	MODIFIER	PFDN4	ENSBTAG00000008812	Transcript	ENSBTAT00000085038	protein_coding	-	-	-	-	-	-	-	-	-	-	T	T/C	1871	1	-	VGNC	-	-	-	-	-	-	-	-	-	-	-	-	-	-	-	-	-	-
rs110324238	13:81646766-81646766	C	downstream_gene_variant	MODIFIER	PFDN4	ENSBTAG00000008812	Transcript	ENSBTAT00000088690	protein_coding	-	-	-	-	-	-	-	-	-	-	T	T/C	1871	1	-	VGNC	-	-	-	-	-	-	-	-	-	-	-	-	-	-	-	-	-	-
rs110324238	13:81646766-81646766	C	downstream_gene_variant	MODIFIER	PFDN4	ENSBTAG00000008812	Transcript	ENSBTAT00000090188	protein_coding	-	-	-	-	-	-	-	-	-	-	T	T/C	1871	1	-	VGNC	-	-	-	-	-	-	-	-	-	-	-	-	-	-	-	-	-	-
rs110324238	13:81646766-81646766	C	upstream_gene_variant	MODIFIER	-	ENSBTAG00000069148	Transcript	ENSBTAT00000091678	lncRNA	-	-	-	-	-	-	-	-	-	-	T	T/C	6640	1	-	-	-	-	-	-	-	-	-	-	-	-	-	-	-	-	-	-	-	-
rs110324238	13:81646766-81646766	C	downstream_gene_variant	MODIFIER	PFDN4	ENSBTAG00000008812	Transcript	ENSBTAT00000094897	protein_coding	-	-	-	-	-	-	-	-	-	-	T	T/C	1871	1	-	VGNC	-	-	-	-	-	-	-	-	-	-	-	-	-	-	-	-	-	-
rs110324238	13:81646766-81646766	C	downstream_gene_variant	MODIFIER	-	ENSBTAG00000058020	Transcript	ENSBTAT00000096869	lncRNA	-	-	-	-	-	-	-	-	-	-	T	T/C	2807	-1	-	-	-	-	-	-	-	-	-	-	-	-	-	-	-	-	-	-	-	-
rs110324238	13:81646766-81646766	C	downstream_gene_variant	MODIFIER	PFDN4	ENSBTAG00000008812	Transcript	ENSBTAT00000100680	protein_coding	-	-	-	-	-	-	-	-	-	-	T	T/C	1871	1	-	VGNC	-	-	-	-	-	-	-	-	-	-	-	-	-	-	-	-	-	-
rs110324238	13:81646766-81646766	C	upstream_gene_variant	MODIFIER	-	ENSBTAG00000069148	Transcript	ENSBTAT00000104360	lncRNA	-	-	-	-	-	-	-	-	-	-	T	T/C	5261	1	-	-	-	-	-	-	-	-	-	-	-	-	-	-	-	-	-	-	-	-
rs110324238	13:81646766-81646766	C	downstream_gene_variant	MODIFIER	PFDN4	ENSBTAG00000008812	Transcript	ENSBTAT00000106457	protein_coding	-	-	-	-	-	-	-	-	-	-	T	T/C	1871	1	-	VGNC	-	-	-	-	-	-	-	-	-	-	-	-	-	-	-	-	-	-
rs110324238	13:81646766-81646766	C	downstream_gene_variant	MODIFIER	-	ENSBTAG00000058020	Transcript	ENSBTAT00000111194	lncRNA	-	-	-	-	-	-	-	-	-	-	T	T/C	5161	-1	-	-	-	-	-	-	-	-	-	-	-	-	-	-	-	-	-	-	-	-
rs110324238	13:81646766-81646766	C	upstream_gene_variant	MODIFIER	-	ENSBTAG00000069148	Transcript	ENSBTAT00000117103	lncRNA	-	-	-	-	-	-	-	-	-	-	T	T/C	6059	1	-	-	-	-	-	-	-	-	-	-	-	-	-	-	-	-	-	-	-	-
rs109720559	13:82574013-82574013	A	upstream_gene_variant	MODIFIER	-	ENSBTAG00000062274	Transcript	ENSBTAT00000110052	lncRNA	-	-	-	-	-	-	-	-	-	-	G	G/A	7008	1	-	-	-	-	-	-	-	-	-	-	-	-	-	-	-	-	-	-	-	-
rs109720559	13:82574013-82574013	A	upstream_gene_variant	MODIFIER	-	ENSBTAG00000062274	Transcript	ENSBTAT00000122926	lncRNA	-	-	-	-	-	-	-	-	-	-	G	G/A	6949	1	-	-	-	-	-	-	-	-	-	-	-	-	-	-	-	-	-	-	-	-
rs42441151	13:82616878-82616878	C	intron_variant,non_coding_transcript_variant	MODIFIER	-	ENSBTAG00000062274	Transcript	ENSBTAT00000110052	lncRNA	-	1/2	-	-	-	-	-	-	-	-	T	T/C	-	1	-	-	-	-	-	-	-	-	-	-	-	-	-	-	-	-	-	-	-	-
rs42441151	13:82616878-82616878	C	intron_variant,non_coding_transcript_variant	MODIFIER	-	ENSBTAG00000062274	Transcript	ENSBTAT00000122926	lncRNA	-	1/1	-	-	-	-	-	-	-	-	T	T/C	-	1	-	-	-	-	-	-	-	-	-	-	-	-	-	-	-	-	-	-	-	-
rs42730765	13:82944119-82944119	A	intergenic_variant	MODIFIER	-	-	-	-	-	-	-	-	-	-	-	-	-	-	-	G	G/A	-	-	-	-	-	-	-	-	-	-	-	-	-	-	-	-	-	-	-	-	-	-
rs41629750	14:810863-810863	G	upstream_gene_variant	MODIFIER	SPATC1	ENSBTAG00000026350	Transcript	ENSBTAT00000037416	protein_coding	-	-	-	-	-	-	-	-	-	-	A	A/G	4472	-1	-	VGNC	-	-	-	-	-	P1	-	-	-	-	-	-	Milk_yield+Animal_QTLdb+102281,Milk_fat_yield+Animal_QTLdb+102526,Milk_fat_percentage+Animal_QTLdb+103507,Milk_protein_percentage+Animal_QTLdb+104743,Milk_casein_percentage+Animal_QTLdb+109044,Lifetime_profit_index+Animal_QTLdb+122546,Milk_yield+Animal_QTLdb+14899,Milk_fat_percentage+Animal_QTLdb+14948,Milk_protein_percentage+Animal_QTLdb+15011,Milk_fat_percentage+Animal_QTLdb+153820,Milk_cholest…	-	-	-	-	-
rs41602527	14:1423562-1423562	G	splice_region_variant,intron_variant	LOW	LY6E	ENSBTAG00000017040	Transcript	ENSBTAT00000022654	protein_coding	-	3/3	-	-	-	-	-	-	-	-	A	A/G	-	-1	-	VGNC	-	-	-	-	-	P1	-	-	-	-	-	-	Milk_yield+Animal_QTLdb+102368,Milk_fat_yield+Animal_QTLdb+102675,Milk_fat_percentage+Animal_QTLdb+103630,Milk_protein_percentage+Animal_QTLdb+104996,Milk_fat_percentage+Animal_QTLdb+173610,Milk_fat_yield+Animal_QTLdb+174174,Milk_yield+Animal_QTLdb+174564,Milk_protein_percentage+Animal_QTLdb+174957,Milk_protein_yield+Animal_QTLdb+175532,Milk_palmitic_acid_content+Animal_QTLdb+203540,Milk_C16_inde…	-	-	-	-	-
rs3423092932	14:1854457-1854457	T	intron_variant	MODIFIER	ADGRB1	ENSBTAG00000006385	Transcript	ENSBTAT00000008376	protein_coding	-	1/29	-	-	-	-	-	-	-	-	C	C/T	-	-1	-	VGNC	-	-	-	-	-	P1	-	-	-	-	-	-	-	-	-	-	-	-
rs137698269	14:3917528-3917528	G	intergenic_variant	MODIFIER	-	-	-	-	-	-	-	-	-	-	-	-	-	-	-	A	A/G	-	-	-	-	-	-	-	-	-	-	-	-	-	-	-	-	-	-	-	-	-	-
rs109567472	14:4046383-4046383	C	downstream_gene_variant	MODIFIER	-	ENSBTAG00000064865	Transcript	ENSBTAT00000125121	lncRNA	-	-	-	-	-	-	-	-	-	-	T	T/C/G	7020	1	-	-	-	-	-	-	-	-	-	-	-	-	-	-	Milking_speed+Animal_QTLdb+157939,Milk_palmitic_acid_content+Animal_QTLdb+200690,Milk_oleic_acid_content+Animal_QTLdb+205954,Milk_linolenic_acid_content+Animal_QTLdb+205955	-	-	-	-	-
rs109567472	14:4046383-4046383	G	downstream_gene_variant	MODIFIER	-	ENSBTAG00000064865	Transcript	ENSBTAT00000125121	lncRNA	-	-	-	-	-	-	-	-	-	-	T	T/C/G	7020	1	-	-	-	-	-	-	-	-	-	-	-	-	-	-	Milking_speed+Animal_QTLdb+157939,Milk_palmitic_acid_content+Animal_QTLdb+200690,Milk_oleic_acid_content+Animal_QTLdb+205954,Milk_linolenic_acid_content+Animal_QTLdb+205955	-	-	-	-	-
rs133876934	14:32995254-32995254	A	intergenic_variant	MODIFIER	-	-	-	-	-	-	-	-	-	-	-	-	-	-	-	G	G/A	-	-	-	-	-	-	-	-	-	-	-	-	-	-	-	-	-	-	-	-	-	-
rs136556795	14:33031367-33031367	T	intergenic_variant	MODIFIER	-	-	-	-	-	-	-	-	-	-	-	-	-	-	-	C	C/T	-	-	-	-	-	-	-	-	-	-	-	-	-	-	-	-	-	-	-	-	-	-
rs134323507	15:1183441-1183441	T	intergenic_variant	MODIFIER	-	-	-	-	-	-	-	-	-	-	-	-	-	-	-	C	C/T	-	-	-	-	-	-	-	-	-	-	-	-	-	-	-	-	-	-	-	-	-	-
rs41762920	15:35856607-35856607	A	intron_variant,non_coding_transcript_variant	MODIFIER	-	ENSBTAG00000068173	Transcript	ENSBTAT00000090489	lncRNA	-	1/3	-	-	-	-	-	-	-	-	G	G/A	-	1	-	-	-	-	-	-	-	-	-	-	-	-	-	-	-	-	-	-	-	-
rs41762920	15:35856607-35856607	A	intron_variant,non_coding_transcript_variant	MODIFIER	-	ENSBTAG00000068173	Transcript	ENSBTAT00000098843	lncRNA	-	1/3	-	-	-	-	-	-	-	-	G	G/A	-	1	-	-	-	-	-	-	-	-	-	-	-	-	-	-	-	-	-	-	-	-
rs41762920	15:35856607-35856607	A	intron_variant,non_coding_transcript_variant	MODIFIER	-	ENSBTAG00000068173	Transcript	ENSBTAT00000100212	lncRNA	-	1/2	-	-	-	-	-	-	-	-	G	G/A	-	1	-	-	-	-	-	-	-	-	-	-	-	-	-	-	-	-	-	-	-	-
rs41762920	15:35856607-35856607	A	upstream_gene_variant	MODIFIER	-	ENSBTAG00000059099	Transcript	ENSBTAT00000102336	lncRNA	-	-	-	-	-	-	-	-	-	-	G	G/A	2340	1	-	-	-	-	-	-	-	-	-	-	-	-	-	-	-	-	-	-	-	-
rs41762920	15:35856607-35856607	A	intron_variant,non_coding_transcript_variant	MODIFIER	-	ENSBTAG00000068173	Transcript	ENSBTAT00000110236	lncRNA	-	1/3	-	-	-	-	-	-	-	-	G	G/A	-	1	-	-	-	-	-	-	-	-	-	-	-	-	-	-	-	-	-	-	-	-
rs41762920	15:35856607-35856607	A	intron_variant,non_coding_transcript_variant	MODIFIER	-	ENSBTAG00000068173	Transcript	ENSBTAT00000122816	lncRNA	-	1/3	-	-	-	-	-	-	-	-	G	G/A	-	1	-	-	-	-	-	-	-	-	-	-	-	-	-	-	-	-	-	-	-	-
rs41762920	15:35856607-35856607	A	intron_variant,non_coding_transcript_variant	MODIFIER	-	ENSBTAG00000068173	Transcript	ENSBTAT00000126586	lncRNA	-	1/1	-	-	-	-	-	-	-	-	G	G/A	-	1	-	-	-	-	-	-	-	-	-	-	-	-	-	-	-	-	-	-	-	-
rs41566637	15:36724876-36724876	T	intergenic_variant	MODIFIER	-	-	-	-	-	-	-	-	-	-	-	-	-	-	-	C	C/T	-	-	-	-	-	-	-	-	-	-	-	-	-	-	-	-	-	-	-	-	-	-
rs29014612	16:19370230-19370230	C	intron_variant	MODIFIER	USH2A	ENSBTAG00000006188	Transcript	ENSBTAT00000061112	protein_coding	-	31/70	-	-	-	-	-	-	-	-	A	A/C	-	-1	-	VGNC	-	-	-	-	-	P1	-	-	-	-	-	-	-	-	-	-	-	-
rs29014612	16:19370230-19370230	C	intron_variant	MODIFIER	USH2A	ENSBTAG00000006188	Transcript	ENSBTAT00000100591	protein_coding	-	31/71	-	-	-	-	-	-	-	-	A	A/C	-	-1	-	VGNC	-	-	-	-	-	-	-	-	-	-	-	-	-	-	-	-	-	-
rs108954365	16:19568001-19568001	C	intron_variant	MODIFIER	USH2A	ENSBTAG00000006188	Transcript	ENSBTAT00000061112	protein_coding	-	18/70	-	-	-	-	-	-	-	-	T	T/C	-	-1	-	VGNC	-	-	-	-	-	P1	-	-	-	-	-	-	Milk_fat_yield+Animal_QTLdb+26008,Body_weight+Animal_QTLdb+68807,Body_weight_gain+Animal_QTLdb+68808	-	-	-	-	-
rs108954365	16:19568001-19568001	C	intron_variant	MODIFIER	USH2A	ENSBTAG00000006188	Transcript	ENSBTAT00000100591	protein_coding	-	18/71	-	-	-	-	-	-	-	-	T	T/C	-	-1	-	VGNC	-	-	-	-	-	-	-	-	-	-	-	-	Milk_fat_yield+Animal_QTLdb+26008,Body_weight+Animal_QTLdb+68807,Body_weight_gain+Animal_QTLdb+68808	-	-	-	-	-
rs133821646	17:2370851-2370851	G	intergenic_variant	MODIFIER	-	-	-	-	-	-	-	-	-	-	-	-	-	-	-	A	A/G	-	-	-	-	-	-	-	-	-	-	-	-	-	-	-	-	-	-	-	-	-	-
rs110123517	17:3325010-3325010	C	intron_variant	MODIFIER	DCHS2	ENSBTAG00000024545	Transcript	ENSBTAT00000017605	protein_coding	-	18/19	-	-	-	-	-	-	-	-	T	T/C	-	1	-	HGNC	HGNC:23111	-	-	-	-	P1	-	-	-	-	-	-	-	-	-	-	-	-
rs110123517	17:3325010-3325010	C	intron_variant	MODIFIER	DCHS2	ENSBTAG00000024545	Transcript	ENSBTAT00000130839	protein_coding	-	5/6	-	-	-	-	-	-	-	-	T	T/C	-	1	-	HGNC	HGNC:23111	-	-	-	-	-	-	-	-	-	-	-	-	-	-	-	-	-
rs3423415998	17:20092858-20092858	T	intergenic_variant	MODIFIER	-	-	-	-	-	-	-	-	-	-	-	-	-	-	-	C	C/T	-	-	-	-	-	-	-	-	-	-	-	-	-	-	-	-	-	-	-	-	-	-
rs135730562	17:20107776-20107776	G	intergenic_variant	MODIFIER	-	-	-	-	-	-	-	-	-	-	-	-	-	-	-	T	T/G	-	-	-	-	-	-	-	-	-	-	-	-	-	-	-	-	-	-	-	-	-	-
rs109981365	17:68618815-68618815	C	intron_variant	MODIFIER	AP1B1	ENSBTAG00000001189	Transcript	ENSBTAT00000001576	protein_coding	-	7/22	-	-	-	-	-	-	-	-	T	T/C	-	-1	-	VGNC	-	-	-	-	-	P1	-	-	-	-	-	-	-	-	-	-	-	-
rs109981365	17:68618815-68618815	C	intron_variant	MODIFIER	AP1B1	ENSBTAG00000001189	Transcript	ENSBTAT00000082015	protein_coding	-	7/21	-	-	-	-	-	-	-	-	T	T/C	-	-1	-	VGNC	-	-	-	-	-	-	-	-	-	-	-	-	-	-	-	-	-	-
rs109981365	17:68618815-68618815	C	intron_variant	MODIFIER	AP1B1	ENSBTAG00000001189	Transcript	ENSBTAT00000082086	protein_coding	-	6/15	-	-	-	-	-	-	-	-	T	T/C	-	-1	-	VGNC	-	-	-	-	-	-	-	-	-	-	-	-	-	-	-	-	-	-
rs109981365	17:68618815-68618815	C	intron_variant	MODIFIER	AP1B1	ENSBTAG00000001189	Transcript	ENSBTAT00000083678	protein_coding	-	6/18	-	-	-	-	-	-	-	-	T	T/C	-	-1	-	VGNC	-	-	-	-	-	-	-	-	-	-	-	-	-	-	-	-	-	-
rs109981365	17:68618815-68618815	C	intron_variant	MODIFIER	AP1B1	ENSBTAG00000001189	Transcript	ENSBTAT00000097109	protein_coding	-	7/19	-	-	-	-	-	-	-	-	T	T/C	-	-1	-	VGNC	-	-	-	-	-	-	-	-	-	-	-	-	-	-	-	-	-	-
rs109981365	17:68618815-68618815	C	intron_variant	MODIFIER	AP1B1	ENSBTAG00000001189	Transcript	ENSBTAT00000131160	protein_coding	-	7/22	-	-	-	-	-	-	-	-	T	T/C	-	-1	-	VGNC	-	-	-	-	-	-	-	-	-	-	-	-	-	-	-	-	-	-
rs110463504	17:68924124-68924124	G	intron_variant	MODIFIER	ASCC2	ENSBTAG00000002452	Transcript	ENSBTAT00000003186	protein_coding	-	8/18	-	-	-	-	-	-	-	-	A	A/G	-	-1	-	VGNC	-	-	-	-	-	A2	-	-	-	-	-	-	-	-	-	-	-	-
rs110463504	17:68924124-68924124	G	intron_variant	MODIFIER	ASCC2	ENSBTAG00000002452	Transcript	ENSBTAT00000044508	protein_coding	-	7/13	-	-	-	-	-	-	-	-	A	A/G	-	-1	-	VGNC	-	-	-	-	-	-	-	-	-	-	-	-	-	-	-	-	-	-
rs110463504	17:68924124-68924124	G	intron_variant	MODIFIER	ASCC2	ENSBTAG00000002452	Transcript	ENSBTAT00000081841	protein_coding	-	7/18	-	-	-	-	-	-	-	-	A	A/G	-	-1	-	VGNC	-	-	-	-	-	P2	-	-	-	-	-	-	-	-	-	-	-	-
rs110463504	17:68924124-68924124	G	intron_variant	MODIFIER	ASCC2	ENSBTAG00000002452	Transcript	ENSBTAT00000115598	protein_coding	-	7/18	-	-	-	-	-	-	-	-	A	A/G	-	-1	-	VGNC	-	-	-	-	-	-	-	-	-	-	-	-	-	-	-	-	-	-
rs110463504	17:68924124-68924124	G	intron_variant	MODIFIER	ASCC2	ENSBTAG00000002452	Transcript	ENSBTAT00000123373	protein_coding	-	9/20	-	-	-	-	-	-	-	-	A	A/G	-	-1	-	VGNC	-	-	-	-	-	-	-	-	-	-	-	-	-	-	-	-	-	-
rs132682865	17:70047720-70047720	C	upstream_gene_variant	MODIFIER	LIMK2	ENSBTAG00000010662	Transcript	ENSBTAT00000044280	protein_coding	-	-	-	-	-	-	-	-	-	-	T	T/C	5573	1	-	VGNC	-	-	-	-	-	-	-	-	-	-	-	-	-	-	-	-	-	-
rs132682865	17:70047720-70047720	C	intron_variant	MODIFIER	LIMK2	ENSBTAG00000010662	Transcript	ENSBTAT00000079813	protein_coding	-	1/15	-	-	-	-	-	-	-	-	T	T/C	-	1	-	VGNC	-	-	-	-	-	A1	-	-	-	-	-	-	-	-	-	-	-	-
rs41859838	18:4424089-4424089	A	downstream_gene_variant	MODIFIER	MON1B	ENSBTAG00000052957	Transcript	ENSBTAT00000076386	protein_coding	-	-	-	-	-	-	-	-	-	-	C	C/A	2505	1	-	VGNC	-	-	-	-	-	P1	-	-	-	-	-	-	-	-	-	-	-	-
rs41859838	18:4424089-4424089	A	downstream_gene_variant	MODIFIER	MON1B	ENSBTAG00000052957	Transcript	ENSBTAT00000097144	protein_coding	-	-	-	-	-	-	-	-	-	-	C	C/A	2505	1	-	VGNC	-	-	-	-	-	-	-	-	-	-	-	-	-	-	-	-	-	-
rs41859838	18:4424089-4424089	A	downstream_gene_variant	MODIFIER	MON1B	ENSBTAG00000052957	Transcript	ENSBTAT00000120513	protein_coding	-	-	-	-	-	-	-	-	-	-	C	C/A	2505	1	-	VGNC	-	-	-	-	-	-	-	-	-	-	-	-	-	-	-	-	-	-
rs41859838	18:4424089-4424089	A	intron_variant	MODIFIER	SYCE1L	ENSBTAG00000062306	Transcript	ENSBTAT00000135698	protein_coding	-	1/11	-	-	-	-	-	-	-	-	C	C/A	-	1	-	HGNC	HGNC:37236	-	-	-	-	P1	-	-	-	-	-	-	-	-	-	-	-	-
rs29011610	18:4428953-4428953	G	downstream_gene_variant	MODIFIER	MON1B	ENSBTAG00000052957	Transcript	ENSBTAT00000076386	protein_coding	-	-	-	-	-	-	-	-	-	-	A	A/G	7369	1	-	VGNC	-	-	-	-	-	P1	-	-	-	-	-	-	Conformation_score+Animal_QTLdb+173294	-	-	-	-	-
rs29011610	18:4428953-4428953	G	downstream_gene_variant	MODIFIER	MON1B	ENSBTAG00000052957	Transcript	ENSBTAT00000097144	protein_coding	-	-	-	-	-	-	-	-	-	-	A	A/G	7369	1	-	VGNC	-	-	-	-	-	-	-	-	-	-	-	-	Conformation_score+Animal_QTLdb+173294	-	-	-	-	-
rs29011610	18:4428953-4428953	G	downstream_gene_variant	MODIFIER	MON1B	ENSBTAG00000052957	Transcript	ENSBTAT00000120513	protein_coding	-	-	-	-	-	-	-	-	-	-	A	A/G	7369	1	-	VGNC	-	-	-	-	-	-	-	-	-	-	-	-	Conformation_score+Animal_QTLdb+173294	-	-	-	-	-
rs29011610	18:4428953-4428953	G	intron_variant	MODIFIER	SYCE1L	ENSBTAG00000062306	Transcript	ENSBTAT00000135698	protein_coding	-	4/11	-	-	-	-	-	-	-	-	A	A/G	-	1	-	HGNC	HGNC:37236	-	-	-	-	P1	-	-	-	-	-	-	Conformation_score+Animal_QTLdb+173294	-	-	-	-	-
rs41636732	18:4605444-4605444	A	intron_variant	MODIFIER	ADAMTS18	ENSBTAG00000001010	Transcript	ENSBTAT00000001339	protein_coding	-	3/22	-	-	-	-	-	-	-	-	G	G/A	-	-1	-	VGNC	-	-	-	-	-	P1	-	-	-	-	-	-	-	-	-	-	-	-
rs134116687	18:55712105-55712105	T	downstream_gene_variant	MODIFIER	TRPM4	ENSBTAG00000006139	Transcript	ENSBTAT00000008077	protein_coding	-	-	-	-	-	-	-	-	-	-	C	C/T	8526	1	-	VGNC	-	-	-	-	-	-	-	-	-	-	-	-	-	-	-	-	-	-
rs134116687	18:55712105-55712105	T	downstream_gene_variant	MODIFIER	-	ENSBTAG00000030505	Transcript	ENSBTAT00000063664	protein_coding	-	-	-	-	-	-	-	-	-	-	C	C/T	9081	-1	-	-	-	-	-	-	-	P1	-	-	-	-	-	-	-	-	-	-	-	-
rs134116687	18:55712105-55712105	T	downstream_gene_variant	MODIFIER	TRPM4	ENSBTAG00000006139	Transcript	ENSBTAT00000123075	protein_coding	-	-	-	-	-	-	-	-	-	-	C	C/T	8526	1	-	VGNC	-	-	-	-	-	-	-	-	-	-	-	-	-	-	-	-	-	-
rs134116687	18:55712105-55712105	T	downstream_gene_variant	MODIFIER	TRPM4	ENSBTAG00000006139	Transcript	ENSBTAT00000132891	protein_coding	-	-	-	-	-	-	-	-	-	-	C	C/T	8526	1	-	VGNC	-	-	-	-	-	P1	-	-	-	-	-	-	-	-	-	-	-	-
rs41582489	18:55725572-55725572	C	intron_variant	MODIFIER	-	ENSBTAG00000030505	Transcript	ENSBTAT00000063664	protein_coding	-	9/13	-	-	-	-	-	-	-	-	T	T/C	-	-1	-	-	-	-	-	-	-	P1	-	-	-	-	-	-	-	-	-	-	-	-
rs109045973	18:62162015-62162015	C	downstream_gene_variant	MODIFIER	BRSK1	ENSBTAG00000015226	Transcript	ENSBTAT00000020255	protein_coding	-	-	-	-	-	-	-	-	-	-	A	A/C	4513	-1	-	VGNC	-	-	-	-	-	-	-	-	-	-	-	-	Inseminations_per_conception+Animal_QTLdb+212862	-	-	-	-	-
rs109045973	18:62162015-62162015	C	synonymous_variant	LOW	TMEM150B	ENSBTAG00000022813	Transcript	ENSBTAT00000055412	protein_coding	6/8	-	-	-	493	294	98	G	ggA/ggC	-	A	A/C	-	1	-	VGNC	-	-	-	-	-	P1	-	-	-	-	-	-	Inseminations_per_conception+Animal_QTLdb+212862	-	-	-	-	-
rs109045973	18:62162015-62162015	C	intron_variant	MODIFIER	KMT5C	ENSBTAG00000014087	Transcript	ENSBTAT00000075432	protein_coding	-	1/9	-	-	-	-	-	-	-	-	A	A/C	-	-1	-	VGNC	-	-	-	-	-	P1	-	-	-	-	-	-	Inseminations_per_conception+Animal_QTLdb+212862	-	-	-	-	-
rs109045973	18:62162015-62162015	C	synonymous_variant	LOW	TMEM150B	ENSBTAG00000022813	Transcript	ENSBTAT00000086020	protein_coding	5/7	-	-	-	871	672	224	G	ggA/ggC	-	A	A/C	-	1	-	VGNC	-	-	-	-	-	-	-	-	-	-	-	-	Inseminations_per_conception+Animal_QTLdb+212862	-	-	-	-	-
rs109045973	18:62162015-62162015	C	downstream_gene_variant	MODIFIER	BRSK1	ENSBTAG00000015226	Transcript	ENSBTAT00000089851	protein_coding	-	-	-	-	-	-	-	-	-	-	A	A/C	4513	-1	-	VGNC	-	-	-	-	-	P1	-	-	-	-	-	-	Inseminations_per_conception+Animal_QTLdb+212862	-	-	-	-	-
rs3423437717	18:63845221-63845221	C	intron_variant	MODIFIER	ZNF71	ENSBTAG00000051066	Transcript	ENSBTAT00000085337	protein_coding	-	2/3	-	-	-	-	-	-	-	-	T	T/C	-	-1	-	HGNC	HGNC:13141	-	-	-	-	P1	-	-	-	-	-	-	-	-	-	-	-	-
rs3423437717	18:63845221-63845221	C	intron_variant	MODIFIER	ZNF71	ENSBTAG00000051066	Transcript	ENSBTAT00000089408	protein_coding	-	3/3	-	-	-	-	-	-	-	-	T	T/C	-	-1	-	HGNC	HGNC:13141	-	-	-	-	-	-	-	-	-	-	-	-	-	-	-	-	-
rs3423437717	18:63845221-63845221	C	intron_variant	MODIFIER	ZNF71	ENSBTAG00000051066	Transcript	ENSBTAT00000093347	protein_coding	-	3/3	-	-	-	-	-	-	-	-	T	T/C	-	-1	-	HGNC	HGNC:13141	-	-	-	-	-	-	-	-	-	-	-	-	-	-	-	-	-
rs3423437717	18:63845221-63845221	C	intron_variant	MODIFIER	ZNF71	ENSBTAG00000051066	Transcript	ENSBTAT00000105925	protein_coding	-	3/3	-	-	-	-	-	-	-	-	T	T/C	-	-1	-	HGNC	HGNC:13141	-	-	-	-	-	-	-	-	-	-	-	-	-	-	-	-	-
rs3423437717	18:63845221-63845221	C	intron_variant	MODIFIER	ZNF71	ENSBTAG00000051066	Transcript	ENSBTAT00000117145	protein_coding	-	3/3	-	-	-	-	-	-	-	-	T	T/C	-	-1	-	HGNC	HGNC:13141	-	-	-	-	-	-	-	-	-	-	-	-	-	-	-	-	-
rs3423437717	18:63845221-63845221	C	intron_variant	MODIFIER	-	ENSBTAG00000054544	Transcript	ENSBTAT00000125402	protein_coding	-	2/5	-	-	-	-	-	-	-	-	T	T/C	-	-1	-	-	-	-	-	-	-	-	-	-	-	-	-	-	-	-	-	-	-	-
rs3423437717	18:63845221-63845221	C	upstream_gene_variant	MODIFIER	-	ENSBTAG00000054544	Transcript	ENSBTAT00000132829	protein_coding	-	-	-	-	-	-	-	-	-	-	T	T/C	8242	-1	-	-	-	-	-	-	-	-	-	-	-	-	-	-	-	-	-	-	-	-
rs110508237	18:64554144-64554144	T	intron_variant	MODIFIER	ZNF304	ENSBTAG00000017872	Transcript	ENSBTAT00000119692	protein_coding	-	1/1	-	-	-	-	-	-	-	-	C	C/T	-	1	-	VGNC	-	-	-	-	-	P1	-	-	-	-	-	-	-	-	-	-	-	-
rs136398464	18:64809695-64809695	T	upstream_gene_variant	MODIFIER	-	ENSBTAG00000037981	Transcript	ENSBTAT00000055561	protein_coding	-	-	-	-	-	-	-	-	-	-	C	C/T	871	-1	-	-	-	-	-	-	-	P2	-	-	-	-	-	-	-	-	-	-	-	-
rs136398464	18:64809695-64809695	T	downstream_gene_variant	MODIFIER	-	ENSBTAG00000048261	Transcript	ENSBTAT00000063593	protein_coding	-	-	-	-	-	-	-	-	-	-	C	C/T	6770	-1	-	-	-	-	-	-	-	P1	-	-	-	-	-	-	-	-	-	-	-	-
rs136398464	18:64809695-64809695	T	upstream_gene_variant	MODIFIER	-	ENSBTAG00000037981	Transcript	ENSBTAT00000106100	protein_coding	-	-	-	-	-	-	-	-	-	-	C	C/T	742	-1	-	-	-	-	-	-	-	-	-	-	-	-	-	-	-	-	-	-	-	-
rs136398464	18:64809695-64809695	T	upstream_gene_variant	MODIFIER	-	ENSBTAG00000057653	Transcript	ENSBTAT00000120887	protein_coding	-	-	-	-	-	-	-	-	-	-	C	C/T	6610	-1	-	-	-	-	-	-	-	P1	-	-	-	-	-	-	-	-	-	-	-	-
rs136398464	18:64809695-64809695	T	upstream_gene_variant	MODIFIER	-	ENSBTAG00000037981	Transcript	ENSBTAT00000134049	protein_coding	-	-	-	-	-	-	-	-	-	-	C	C/T	732	-1	-	-	-	-	-	-	-	A2	-	-	-	-	-	-	-	-	-	-	-	-
rs136398464	18:64809695-64809695	T	regulatory_region_variant	MODIFIER	-	-	RegulatoryFeature	ENSBTAR18_BGT9D	enhancer	-	-	-	-	-	-	-	-	-	-	C	C/T	-	-	-	-	-	-	-	-	-	-	-	-	-	-	-	-	-	-	-	-	-	-
rs41900308	18:64971452-64971452	G	intron_variant	MODIFIER	-	ENSBTAG00000038635	Transcript	ENSBTAT00000053442	protein_coding	-	3/3	-	-	-	-	-	-	-	-	A	A/G	-	-1	-	-	-	-	-	-	-	-	-	-	-	-	-	-	-	-	-	-	-	-
rs41900308	18:64971452-64971452	G	intron_variant	MODIFIER	-	ENSBTAG00000038635	Transcript	ENSBTAT00000066503	protein_coding	-	2/2	-	-	-	-	-	-	-	-	A	A/G	-	-1	-	-	-	-	-	-	-	-	-	-	-	-	-	-	-	-	-	-	-	-
rs41900308	18:64971452-64971452	G	intron_variant	MODIFIER	-	ENSBTAG00000038635	Transcript	ENSBTAT00000070936	protein_coding	-	2/2	-	-	-	-	-	-	-	-	A	A/G	-	-1	-	-	-	-	-	-	-	-	-	-	-	-	-	-	-	-	-	-	-	-
rs41900308	18:64971452-64971452	G	intron_variant	MODIFIER	-	ENSBTAG00000038635	Transcript	ENSBTAT00000073690	protein_coding	-	2/3	-	-	-	-	-	-	-	-	A	A/G	-	-1	-	-	-	-	-	-	-	P1	-	-	-	-	-	-	-	-	-	-	-	-
rs41900308	18:64971452-64971452	G	intron_variant	MODIFIER	-	ENSBTAG00000038635	Transcript	ENSBTAT00000078852	protein_coding	-	1/1	-	-	-	-	-	-	-	-	A	A/G	-	-1	-	-	-	-	-	-	-	-	-	-	-	-	-	-	-	-	-	-	-	-
rs41900308	18:64971452-64971452	G	intron_variant	MODIFIER	-	ENSBTAG00000056413	Transcript	ENSBTAT00000099762	protein_coding	-	2/2	-	-	-	-	-	-	-	-	A	A/G	-	1	-	-	-	-	-	-	-	P1	-	-	-	-	-	-	-	-	-	-	-	-
rs42924027	18:65078634-65078634	T	upstream_gene_variant	MODIFIER	-	ENSBTAG00000054731	Transcript	ENSBTAT00000079004	protein_coding	-	-	-	-	-	-	-	-	-	-	C	C/T	501	1	-	-	-	-	-	-	-	P1	-	-	-	-	-	-	-	-	-	-	-	-
rs42924027	18:65078634-65078634	T	downstream_gene_variant	MODIFIER	-	ENSBTAG00000060867	Transcript	ENSBTAT00000121262	protein_coding	-	-	-	-	-	-	-	-	-	-	C	C/T	5779	-1	-	-	-	-	-	-	-	P1	-	-	-	-	-	-	-	-	-	-	-	-
rs110036994	19:7717717-7717717	C	synonymous_variant	LOW	TRIM25	ENSBTAG00000009948	Transcript	ENSBTAT00000013121	protein_coding	9/9	-	-	-	1672	1644	548	A	gcA/gcG	-	T	T/C	-	-1	-	VGNC	-	-	-	-	-	P1	-	-	-	-	-	-	-	-	-	-	-	-
rs110036994	19:7717717-7717717	C	synonymous_variant	LOW	TRIM25	ENSBTAG00000009948	Transcript	ENSBTAT00000071265	protein_coding	8/8	-	-	-	1676	1548	516	A	gcA/gcG	-	T	T/C	-	-1	-	VGNC	-	-	-	-	-	-	-	-	-	-	-	-	-	-	-	-	-	-
rs110036994	19:7717717-7717717	C	synonymous_variant	LOW	TRIM25	ENSBTAG00000009948	Transcript	ENSBTAT00000074626	protein_coding	9/9	-	-	-	1621	1593	531	A	gcA/gcG	-	T	T/C	-	-1	-	VGNC	-	-	-	-	-	-	-	-	-	-	-	-	-	-	-	-	-	-
rs110036994	19:7717717-7717717	C	intron_variant	MODIFIER	TRIM25	ENSBTAG00000009948	Transcript	ENSBTAT00000086002	protein_coding	-	9/9	-	-	-	-	-	-	-	-	T	T/C	-	-1	-	VGNC	-	-	-	-	-	-	-	-	-	-	-	-	-	-	-	-	-	-
rs110036994	19:7717717-7717717	C	synonymous_variant	LOW	TRIM25	ENSBTAG00000009948	Transcript	ENSBTAT00000093546	protein_coding	8/8	-	-	-	1603	1575	525	A	gcA/gcG	-	T	T/C	-	-1	-	VGNC	-	-	-	-	-	-	-	-	-	-	-	-	-	-	-	-	-	-
rs109194627	19:8596154-8596154	G	intergenic_variant	MODIFIER	-	-	-	-	-	-	-	-	-	-	-	-	-	-	-	A	A/G	-	-	-	-	-	-	-	-	-	-	-	-	-	-	-	-	-	-	-	-	-	-
rs109373475	19:8730082-8730082	T	intron_variant	MODIFIER	CUEDC1	ENSBTAG00000007147	Transcript	ENSBTAT00000009405	protein_coding	-	1/10	-	-	-	-	-	-	-	-	C	C/T	-	-1	-	VGNC	-	-	-	-	-	P2	-	-	-	-	-	-	-	-	-	-	-	-
rs109373475	19:8730082-8730082	T	intron_variant	MODIFIER	CUEDC1	ENSBTAG00000007147	Transcript	ENSBTAT00000083671	protein_coding	-	1/8	-	-	-	-	-	-	-	-	C	C/T	-	-1	-	VGNC	-	-	-	-	-	A2	-	-	-	-	-	-	-	-	-	-	-	-
rs109373475	19:8730082-8730082	T	upstream_gene_variant	MODIFIER	-	ENSBTAG00000062826	Transcript	ENSBTAT00000108511	protein_coding	-	-	-	-	-	-	-	-	-	-	C	C/T	6526	1	-	-	-	-	-	-	-	P1	-	-	-	-	-	-	-	-	-	-	-	-
rs136967970	19:10501667-10501667	G	intergenic_variant	MODIFIER	-	-	-	-	-	-	-	-	-	-	-	-	-	-	-	A	A/G	-	-	-	-	-	-	-	-	-	-	-	-	-	-	-	-	-	-	-	-	-	-
rs109579864	19:12106647-12106647	G	intron_variant	MODIFIER	BCAS3	ENSBTAG00000002663	Transcript	ENSBTAT00000029909	protein_coding	-	13/22	-	-	-	-	-	-	-	-	A	A/G	-	-1	-	VGNC	-	-	-	-	-	-	-	-	-	-	-	-	-	-	-	-	-	-
rs109579864	19:12106647-12106647	G	intron_variant	MODIFIER	BCAS3	ENSBTAG00000002663	Transcript	ENSBTAT00000063786	protein_coding	-	13/23	-	-	-	-	-	-	-	-	A	A/G	-	-1	-	VGNC	-	-	-	-	-	-	-	-	-	-	-	-	-	-	-	-	-	-
rs109579864	19:12106647-12106647	G	intron_variant	MODIFIER	BCAS3	ENSBTAG00000002663	Transcript	ENSBTAT00000089797	protein_coding	-	14/24	-	-	-	-	-	-	-	-	A	A/G	-	-1	-	VGNC	-	-	-	-	-	-	-	-	-	-	-	-	-	-	-	-	-	-
rs109579864	19:12106647-12106647	G	intron_variant	MODIFIER	BCAS3	ENSBTAG00000002663	Transcript	ENSBTAT00000107401	protein_coding	-	13/22	-	-	-	-	-	-	-	-	A	A/G	-	-1	-	VGNC	-	-	-	-	-	-	-	-	-	-	-	-	-	-	-	-	-	-
rs109579864	19:12106647-12106647	G	intron_variant	MODIFIER	BCAS3	ENSBTAG00000002663	Transcript	ENSBTAT00000110692	protein_coding	-	13/25	-	-	-	-	-	-	-	-	A	A/G	-	-1	-	VGNC	-	-	-	-	-	-	-	-	-	-	-	-	-	-	-	-	-	-
rs109579864	19:12106647-12106647	G	intron_variant	MODIFIER	BCAS3	ENSBTAG00000002663	Transcript	ENSBTAT00000115513	protein_coding	-	13/23	-	-	-	-	-	-	-	-	A	A/G	-	-1	-	VGNC	-	-	-	-	-	P1	-	-	-	-	-	-	-	-	-	-	-	-
rs41665397	19:12563320-12563320	T	intergenic_variant	MODIFIER	-	-	-	-	-	-	-	-	-	-	-	-	-	-	-	C	C/T	-	-	-	-	-	-	-	-	-	-	-	-	-	-	-	-	-	-	-	-	-	-
rs136498445	19:13204461-13204461	G	intergenic_variant	MODIFIER	-	-	-	-	-	-	-	-	-	-	-	-	-	-	-	A	A/G	-	-	-	-	-	-	-	-	-	-	-	-	-	-	-	-	-	-	-	-	-	-
rs110686148	19:13223983-13223983	G	downstream_gene_variant	MODIFIER	-	ENSBTAG00000000560	Transcript	ENSBTAT00000000730	protein_coding	-	-	-	-	-	-	-	-	-	-	T	T/G	7419	1	-	-	-	-	-	-	-	P1	-	-	-	-	-	-	-	-	-	-	-	-
rs110887612	19:55732113-55732113	G	upstream_gene_variant	MODIFIER	TRIM47	ENSBTAG00000018920	Transcript	ENSBTAT00000025190	protein_coding	-	-	-	-	-	-	-	-	-	-	A	A/G	9044	1	-	VGNC	-	-	-	-	-	P2	-	-	-	-	-	-	-	-	-	-	-	-
rs110887612	19:55732113-55732113	G	3_prime_UTR_variant	MODIFIER	TRIM65	ENSBTAG00000022006	Transcript	ENSBTAT00000029353	protein_coding	6/6	-	-	-	2656	-	-	-	-	-	A	A/G	-	1	-	VGNC	-	-	-	-	-	P1	-	-	-	-	-	-	-	-	-	-	-	-
rs110887612	19:55732113-55732113	G	downstream_gene_variant	MODIFIER	MRPL38	ENSBTAG00000022009	Transcript	ENSBTAT00000052019	protein_coding	-	-	-	-	-	-	-	-	-	-	A	A/G	5938	1	-	VGNC	-	-	-	-	-	P1	-	-	-	-	-	-	-	-	-	-	-	-
rs110887612	19:55732113-55732113	G	3_prime_UTR_variant	MODIFIER	TRIM65	ENSBTAG00000022006	Transcript	ENSBTAT00000073528	protein_coding	5/5	-	-	-	2409	-	-	-	-	-	A	A/G	-	1	-	VGNC	-	-	-	-	-	-	-	-	-	-	-	-	-	-	-	-	-	-
rs110887612	19:55732113-55732113	G	upstream_gene_variant	MODIFIER	TRIM47	ENSBTAG00000018920	Transcript	ENSBTAT00000082116	protein_coding	-	-	-	-	-	-	-	-	-	-	A	A/G	8835	1	-	VGNC	-	-	-	-	-	A2	-	-	-	-	-	-	-	-	-	-	-	-
rs110887612	19:55732113-55732113	G	upstream_gene_variant	MODIFIER	TRIM47	ENSBTAG00000018920	Transcript	ENSBTAT00000025190	protein_coding	-	-	-	-	-	-	-	-	-	-	A	A/G	9044	1	-	VGNC	-	-	-	-	-	P2	-	-	-	-	-	-	-	-	-	-	-	-
rs110887612	19:55732113-55732113	G	3_prime_UTR_variant	MODIFIER	TRIM65	ENSBTAG00000022006	Transcript	ENSBTAT00000029353	protein_coding	6/6	-	-	-	2656	-	-	-	-	-	A	A/G	-	1	-	VGNC	-	-	-	-	-	P1	-	-	-	-	-	-	-	-	-	-	-	-
rs110887612	19:55732113-55732113	G	downstream_gene_variant	MODIFIER	MRPL38	ENSBTAG00000022009	Transcript	ENSBTAT00000052019	protein_coding	-	-	-	-	-	-	-	-	-	-	A	A/G	5938	1	-	VGNC	-	-	-	-	-	P1	-	-	-	-	-	-	-	-	-	-	-	-
rs110887612	19:55732113-55732113	G	3_prime_UTR_variant	MODIFIER	TRIM65	ENSBTAG00000022006	Transcript	ENSBTAT00000073528	protein_coding	5/5	-	-	-	2409	-	-	-	-	-	A	A/G	-	1	-	VGNC	-	-	-	-	-	-	-	-	-	-	-	-	-	-	-	-	-	-
rs110887612	19:55732113-55732113	G	upstream_gene_variant	MODIFIER	TRIM47	ENSBTAG00000018920	Transcript	ENSBTAT00000082116	protein_coding	-	-	-	-	-	-	-	-	-	-	A	A/G	8835	1	-	VGNC	-	-	-	-	-	A2	-	-	-	-	-	-	-	-	-	-	-	-
rs42673204	19:57002514-57002514	G	downstream_gene_variant	MODIFIER	-	ENSBTAG00000065109	Transcript	ENSBTAT00000109163	lncRNA	-	-	-	-	-	-	-	-	-	-	A	A/G	3909	1	-	-	-	-	-	-	-	-	-	-	-	-	-	-	-	-	-	-	-	-
rs42673204	19:57002514-57002514	G	upstream_gene_variant	MODIFIER	-	ENSBTAG00000065922	Transcript	ENSBTAT00000130513	lncRNA	-	-	-	-	-	-	-	-	-	-	A	A/G	8853	-1	-	-	-	-	-	-	-	-	-	-	-	-	-	-	-	-	-	-	-	-
rs42673204	19:57002514-57002514	G	intron_variant	MODIFIER	-	ENSBTAG00000066288	Transcript	ENSBTAT00000133607	protein_coding	-	2/2	-	-	-	-	-	-	-	-	A	A/G	-	1	-	-	-	-	-	-	-	P1	-	-	-	-	-	-	-	-	-	-	-	-
rs109623709	19:57231068-57231068	T	intergenic_variant	MODIFIER	-	-	-	-	-	-	-	-	-	-	-	-	-	-	-	C	C/T	-	-	-	-	-	-	-	-	-	-	-	-	-	-	-	-	-	-	-	-	-	-
rs109858762	20:2549449-2549449	C	intron_variant	MODIFIER	KCNIP1	ENSBTAG00000002865	Transcript	ENSBTAT00000003718	protein_coding	-	1/7	-	-	-	-	-	-	-	-	G	G/C	-	1	-	VGNC	-	-	-	-	-	-	-	-	-	-	-	-	-	-	-	-	-	-
rs109858762	20:2549449-2549449	C	intron_variant	MODIFIER	KCNIP1	ENSBTAG00000002865	Transcript	ENSBTAT00000082994	protein_coding	-	1/7	-	-	-	-	-	-	-	-	G	G/C	-	1	-	VGNC	-	-	-	-	-	P1	-	-	-	-	-	-	-	-	-	-	-	-
rs109858762	20:2549449-2549449	C	intron_variant	MODIFIER	KCNIP1	ENSBTAG00000002865	Transcript	ENSBTAT00000113808	protein_coding	-	1/8	-	-	-	-	-	-	-	-	G	G/C	-	1	-	VGNC	-	-	-	-	-	-	-	-	-	-	-	-	-	-	-	-	-	-
rs109858762	20:2549449-2549449	C	intron_variant	MODIFIER	KCNIP1	ENSBTAG00000002865	Transcript	ENSBTAT00000113855	protein_coding	-	1/7	-	-	-	-	-	-	-	-	G	G/C	-	1	-	VGNC	-	-	-	-	-	-	-	-	-	-	-	-	-	-	-	-	-	-
rs109858762	20:2549449-2549449	C	intron_variant	MODIFIER	KCNIP1	ENSBTAG00000002865	Transcript	ENSBTAT00000116980	protein_coding	-	2/8	-	-	-	-	-	-	-	-	G	G/C	-	1	-	VGNC	-	-	-	-	-	-	-	-	-	-	-	-	-	-	-	-	-	-
rs42520485	20:2699096-2699096	T	intron_variant	MODIFIER	GABRP	ENSBTAG00000002779	Transcript	ENSBTAT00000003604	protein_coding	-	9/9	-	-	-	-	-	-	-	-	C	C/T	-	1	-	VGNC	-	-	-	-	-	P2	-	-	-	-	-	-	-	-	-	-	-	-
rs42520485	20:2699096-2699096	T	intron_variant	MODIFIER	GABRP	ENSBTAG00000002779	Transcript	ENSBTAT00000071262	protein_coding	-	8/8	-	-	-	-	-	-	-	-	C	C/T	-	1	-	VGNC	-	-	-	-	-	-	-	-	-	-	-	-	-	-	-	-	-	-
rs42520485	20:2699096-2699096	T	intron_variant	MODIFIER	GABRP	ENSBTAG00000002779	Transcript	ENSBTAT00000105134	protein_coding	-	9/10	-	-	-	-	-	-	-	-	C	C/T	-	1	-	VGNC	-	-	-	-	-	A2	-	-	-	-	-	-	-	-	-	-	-	-
rs42794065	20:3241584-3241584	C	intron_variant	MODIFIER	FGF18	ENSBTAG00000000128	Transcript	ENSBTAT00000072791	protein_coding	-	1/3	-	-	-	-	-	-	-	-	T	T/C	-	1	-	VGNC	-	-	-	-	-	-	-	-	-	-	-	-	-	-	-	-	-	-
rs42794065	20:3241584-3241584	C	intron_variant	MODIFIER	FGF18	ENSBTAG00000000128	Transcript	ENSBTAT00000093351	protein_coding	-	2/4	-	-	-	-	-	-	-	-	T	T/C	-	1	-	VGNC	-	-	-	-	-	P1	-	-	-	-	-	-	-	-	-	-	-	-
rs110627799	20:4079529-4079529	A	upstream_gene_variant	MODIFIER	U6	ENSBTAG00000063179	Transcript	ENSBTAT00000091814	snRNA	-	-	-	-	-	-	-	-	-	-	G	G/A	8112	-1	-	RFAM	-	-	-	-	-	-	-	-	-	-	-	-	-	-	-	-	-	-
rs110433832	20:4422634-4422634	A	intron_variant	MODIFIER	NEURL1B	ENSBTAG00000001429	Transcript	ENSBTAT00000001872	protein_coding	-	1/3	-	-	-	-	-	-	-	-	C	C/A	-	1	-	VGNC	-	-	-	-	-	-	-	-	-	-	-	-	-	-	-	-	-	-
rs110433832	20:4422634-4422634	A	intron_variant	MODIFIER	NEURL1B	ENSBTAG00000001429	Transcript	ENSBTAT00000118294	protein_coding	-	1/4	-	-	-	-	-	-	-	-	C	C/A	-	1	-	VGNC	-	-	-	-	-	P1	-	-	-	-	-	-	-	-	-	-	-	-
rs110433832	20:4422634-4422634	A	intron_variant	MODIFIER	NEURL1B	ENSBTAG00000001429	Transcript	ENSBTAT00000123047	protein_coding	-	1/3	-	-	-	-	-	-	-	-	C	C/A	-	1	-	VGNC	-	-	-	-	-	-	-	-	-	-	-	-	-	-	-	-	-	-
rs110513671	20:4516902-4516902	G	intergenic_variant	MODIFIER	-	-	-	-	-	-	-	-	-	-	-	-	-	-	-	A	A/G	-	-	-	-	-	-	-	-	-	-	-	-	-	-	-	-	-	-	-	-	-	-
rs41581570	20:4655604-4655604	T	intron_variant	MODIFIER	ERGIC1	ENSBTAG00000015955	Transcript	ENSBTAT00000021218	protein_coding	-	2/10	-	-	-	-	-	-	-	-	C	C/T	-	1	-	VGNC	-	-	-	-	-	-	-	-	-	-	-	-	-	-	-	-	-	-
rs41581570	20:4655604-4655604	T	intron_variant	MODIFIER	ERGIC1	ENSBTAG00000015955	Transcript	ENSBTAT00000101889	protein_coding	-	2/9	-	-	-	-	-	-	-	-	C	C/T	-	1	-	VGNC	-	-	-	-	-	-	-	-	-	-	-	-	-	-	-	-	-	-
rs41581570	20:4655604-4655604	T	intron_variant	MODIFIER	ERGIC1	ENSBTAG00000015955	Transcript	ENSBTAT00000126083	protein_coding	-	2/9	-	-	-	-	-	-	-	-	C	C/T	-	1	-	VGNC	-	-	-	-	-	P1	-	-	-	-	-	-	-	-	-	-	-	-
rs41581570	20:4655604-4655604	T	intron_variant	MODIFIER	ERGIC1	ENSBTAG00000015955	Transcript	ENSBTAT00000132014	protein_coding	-	2/8	-	-	-	-	-	-	-	-	C	C/T	-	1	-	VGNC	-	-	-	-	-	-	-	-	-	-	-	-	-	-	-	-	-	-
rs42262483	20:5633232-5633232	G	intron_variant	MODIFIER	CPEB4	ENSBTAG00000009995	Transcript	ENSBTAT00000013177	protein_coding	-	2/9	-	-	-	-	-	-	-	-	A	A/G	-	1	-	VGNC	-	-	-	-	-	-	-	-	-	-	-	-	Body_weight+Animal_QTLdb+66683,Body_weight_gain+Animal_QTLdb+66684,Body_weight+Animal_QTLdb+69119	-	-	-	-	-
rs42262483	20:5633232-5633232	G	intron_variant	MODIFIER	CPEB4	ENSBTAG00000009995	Transcript	ENSBTAT00000013179	protein_coding	-	2/7	-	-	-	-	-	-	-	-	A	A/G	-	1	-	VGNC	-	-	-	-	-	-	-	-	-	-	-	-	Body_weight+Animal_QTLdb+66683,Body_weight_gain+Animal_QTLdb+66684,Body_weight+Animal_QTLdb+69119	-	-	-	-	-
rs42262483	20:5633232-5633232	G	intron_variant	MODIFIER	CPEB4	ENSBTAG00000009995	Transcript	ENSBTAT00000071979	protein_coding	-	2/8	-	-	-	-	-	-	-	-	A	A/G	-	1	-	VGNC	-	-	-	-	-	A1	-	-	-	-	-	-	Body_weight+Animal_QTLdb+66683,Body_weight_gain+Animal_QTLdb+66684,Body_weight+Animal_QTLdb+69119	-	-	-	-	-
rs42262483	20:5633232-5633232	G	upstream_gene_variant	MODIFIER	-	ENSBTAG00000049650	Transcript	ENSBTAT00000073503	pseudogene	-	-	-	-	-	-	-	-	-	-	A	A/G	4679	-1	-	-	-	-	-	-	-	-	-	-	-	-	-	-	Body_weight+Animal_QTLdb+66683,Body_weight_gain+Animal_QTLdb+66684,Body_weight+Animal_QTLdb+69119	-	-	-	-	-
rs42262483	20:5633232-5633232	G	intron_variant	MODIFIER	CPEB4	ENSBTAG00000009995	Transcript	ENSBTAT00000080489	protein_coding	-	2/7	-	-	-	-	-	-	-	-	A	A/G	-	1	-	VGNC	-	-	-	-	-	P4	-	-	-	-	-	-	Body_weight+Animal_QTLdb+66683,Body_weight_gain+Animal_QTLdb+66684,Body_weight+Animal_QTLdb+69119	-	-	-	-	-
rs42262483	20:5633232-5633232	G	intron_variant	MODIFIER	CPEB4	ENSBTAG00000009995	Transcript	ENSBTAT00000085786	protein_coding	-	3/9	-	-	-	-	-	-	-	-	A	A/G	-	1	-	VGNC	-	-	-	-	-	-	-	-	-	-	-	-	Body_weight+Animal_QTLdb+66683,Body_weight_gain+Animal_QTLdb+66684,Body_weight+Animal_QTLdb+69119	-	-	-	-	-
rs42263251	20:5695030-5695030	T	upstream_gene_variant	MODIFIER	C20H5orf47	ENSBTAG00000054459	Transcript	ENSBTAT00000086827	protein_coding	-	-	-	-	-	-	-	-	-	-	G	G/T	7857	1	-	EntrezGene	-	-	-	-	-	-	-	-	-	-	-	-	Body_weight+Animal_QTLdb+66685,Body_weight_gain+Animal_QTLdb+66686,Body_weight+Animal_QTLdb+69121	-	-	-	-	-
rs42263251	20:5695030-5695030	T	intron_variant,non_coding_transcript_variant	MODIFIER	-	ENSBTAG00000061924	Transcript	ENSBTAT00000098985	lncRNA	-	2/2	-	-	-	-	-	-	-	-	G	G/T	-	1	-	-	-	-	-	-	-	-	-	-	-	-	-	-	Body_weight+Animal_QTLdb+66685,Body_weight_gain+Animal_QTLdb+66686,Body_weight+Animal_QTLdb+69121	-	-	-	-	-
rs42263251	20:5695030-5695030	T	upstream_gene_variant	MODIFIER	C20H5orf47	ENSBTAG00000054459	Transcript	ENSBTAT00000126184	protein_coding	-	-	-	-	-	-	-	-	-	-	G	G/T	7515	1	-	EntrezGene	-	-	-	-	-	P1	-	-	-	-	-	-	Body_weight+Animal_QTLdb+66685,Body_weight_gain+Animal_QTLdb+66686,Body_weight+Animal_QTLdb+69121	-	-	-	-	-
rs41667474	20:12136194-12136194	C	downstream_gene_variant	MODIFIER	-	ENSBTAG00000069087	Transcript	ENSBTAT00000092844	lncRNA	-	-	-	-	-	-	-	-	-	-	T	T/C	3494	1	-	-	-	-	-	-	-	-	-	-	-	-	-	-	-	-	-	-	-	-
rs41667474	20:12136194-12136194	C	downstream_gene_variant	MODIFIER	-	ENSBTAG00000069087	Transcript	ENSBTAT00000111548	lncRNA	-	-	-	-	-	-	-	-	-	-	T	T/C	4477	1	-	-	-	-	-	-	-	-	-	-	-	-	-	-	-	-	-	-	-	-
rs41667474	20:12136194-12136194	C	downstream_gene_variant	MODIFIER	-	ENSBTAG00000069087	Transcript	ENSBTAT00000117618	lncRNA	-	-	-	-	-	-	-	-	-	-	T	T/C	3494	1	-	-	-	-	-	-	-	-	-	-	-	-	-	-	-	-	-	-	-	-
rs41667474	20:12136194-12136194	C	downstream_gene_variant	MODIFIER	-	ENSBTAG00000069087	Transcript	ENSBTAT00000130405	lncRNA	-	-	-	-	-	-	-	-	-	-	T	T/C	3832	1	-	-	-	-	-	-	-	-	-	-	-	-	-	-	-	-	-	-	-	-
rs41667474	20:12136194-12136194	C	downstream_gene_variant	MODIFIER	-	ENSBTAG00000069087	Transcript	ENSBTAT00000133940	lncRNA	-	-	-	-	-	-	-	-	-	-	T	T/C	3494	1	-	-	-	-	-	-	-	-	-	-	-	-	-	-	-	-	-	-	-	-
rs41598451	20:16134026-16134026	C	intron_variant	MODIFIER	-	ENSBTAG00000065962	Transcript	ENSBTAT00000102325	protein_coding	-	2/3	-	-	-	-	-	-	-	-	T	T/C	-	1	-	-	-	-	-	-	-	P1	-	-	-	-	-	-	-	-	-	-	-	-
rs109809439	20:16527323-16527323	A	intergenic_variant	MODIFIER	-	-	-	-	-	-	-	-	-	-	-	-	-	-	-	G	G/A	-	-	-	-	-	-	-	-	-	-	-	-	-	-	-	-	-	-	-	-	-	-
rs42501206	20:46474260-46474260	T	intergenic_variant	MODIFIER	-	-	-	-	-	-	-	-	-	-	-	-	-	-	-	A	A/T	-	-	-	-	-	-	-	-	-	-	-	-	-	-	-	-	-	-	-	-	-	-
rs43757203	20:47271258-47271258	C	intergenic_variant	MODIFIER	-	-	-	-	-	-	-	-	-	-	-	-	-	-	-	A	A/C	-	-	-	-	-	-	-	-	-	-	-	-	-	-	-	-	-	-	-	-	-	-
rs134731665	21:46304614-46304614	T	intergenic_variant	MODIFIER	-	-	-	-	-	-	-	-	-	-	-	-	-	-	-	G	G/T	-	-	-	-	-	-	-	-	-	-	-	-	-	-	-	-	-	-	-	-	-	-
rs109056407	21:46412392-46412392	G	intergenic_variant	MODIFIER	-	-	-	-	-	-	-	-	-	-	-	-	-	-	-	A	A/G	-	-	-	-	-	-	-	-	-	-	-	-	-	-	-	-	-	-	-	-	-	-
rs110499399	21:46523206-46523206	A	intergenic_variant	MODIFIER	-	-	-	-	-	-	-	-	-	-	-	-	-	-	-	G	G/A	-	-	-	-	-	-	-	-	-	-	-	-	-	-	-	-	-	-	-	-	-	-
rs137474595	21:46587033-46587033	C	regulatory_region_variant	MODIFIER	-	-	RegulatoryFeature	ENSBTAR21_BC8M2	open_chromatin_region	-	-	-	-	-	-	-	-	-	-	T	T/C	-	-	-	-	-	-	-	-	-	-	-	-	-	-	-	-	-	-	-	-	-	-
rs137474595	21:46587033-46587033	C	intergenic_variant	MODIFIER	-	-	-	-	-	-	-	-	-	-	-	-	-	-	-	T	T/C	-	-	-	-	-	-	-	-	-	-	-	-	-	-	-	-	-	-	-	-	-	-
rs136413433	22:963715-963715	C	intron_variant	MODIFIER	EGFR	ENSBTAG00000011628	Transcript	ENSBTAT00000015445	protein_coding	-	8/27	-	-	-	-	-	-	-	-	T	T/C	-	-1	-	VGNC	-	-	-	-	-	-	-	-	-	-	-	-	-	-	-	-	-	-
rs136413433	22:963715-963715	C	intron_variant	MODIFIER	EGFR	ENSBTAG00000011628	Transcript	ENSBTAT00000067365	protein_coding	-	8/27	-	-	-	-	-	-	-	-	T	T/C	-	-1	-	VGNC	-	-	-	-	-	P1	-	-	-	-	-	-	-	-	-	-	-	-
rs110438897	22:23286762-23286762	A	intron_variant	MODIFIER	CNTN4	ENSBTAG00000033225	Transcript	ENSBTAT00000060980	protein_coding	-	14/24	-	-	-	-	-	-	-	-	G	G/A	-	-1	-	VGNC	-	-	-	-	-	P1	-	-	-	-	-	-	Calving_to_conception_interval+Animal_QTLdb+138533	-	-	-	-	-
rs109275311	22:23609651-23609651	T	intron_variant	MODIFIER	CNTN4	ENSBTAG00000033225	Transcript	ENSBTAT00000060980	protein_coding	-	4/24	-	-	-	-	-	-	-	-	C	C/T	-	-1	-	VGNC	-	-	-	-	-	P1	-	-	-	-	-	-	-	-	-	-	-	-
rs42554556	22:24041674-24041674	C	intron_variant	MODIFIER	CNTN4	ENSBTAG00000033225	Transcript	ENSBTAT00000060980	protein_coding	-	2/24	-	-	-	-	-	-	-	-	T	T/C	-	-1	-	VGNC	-	-	-	-	-	P1	-	-	-	-	-	-	-	-	-	-	-	-
rs134134329	22:24378813-24378813	T	intergenic_variant	MODIFIER	-	-	-	-	-	-	-	-	-	-	-	-	-	-	-	C	C/T	-	-	-	-	-	-	-	-	-	-	-	-	-	-	-	-	-	-	-	-	-	-
rs41565671	22:37221156-37221156	A	intron_variant	MODIFIER	PRICKLE2	ENSBTAG00000021835	Transcript	ENSBTAT00000029105	protein_coding	-	1/7	-	-	-	-	-	-	-	-	G	G/A/T	-	1	-	VGNC	-	-	-	-	-	-	-	-	-	-	-	-	Pregnancy_rate+Animal_QTLdb+107033	-	-	-	-	-
rs41565671	22:37221156-37221156	T	intron_variant	MODIFIER	PRICKLE2	ENSBTAG00000021835	Transcript	ENSBTAT00000029105	protein_coding	-	1/7	-	-	-	-	-	-	-	-	G	G/A/T	-	1	-	VGNC	-	-	-	-	-	-	-	-	-	-	-	-	Pregnancy_rate+Animal_QTLdb+107033	-	-	-	-	-
rs41565671	22:37221156-37221156	A	upstream_gene_variant	MODIFIER	PRICKLE2	ENSBTAG00000021835	Transcript	ENSBTAT00000067888	protein_coding	-	-	-	-	-	-	-	-	-	-	G	G/A/T	9570	1	-	VGNC	-	-	-	-	-	-	-	-	-	-	-	-	Pregnancy_rate+Animal_QTLdb+107033	-	-	-	-	-
rs41565671	22:37221156-37221156	T	upstream_gene_variant	MODIFIER	PRICKLE2	ENSBTAG00000021835	Transcript	ENSBTAT00000067888	protein_coding	-	-	-	-	-	-	-	-	-	-	G	G/A/T	9570	1	-	VGNC	-	-	-	-	-	-	-	-	-	-	-	-	Pregnancy_rate+Animal_QTLdb+107033	-	-	-	-	-
rs41565671	22:37221156-37221156	A	intron_variant	MODIFIER	PRICKLE2	ENSBTAG00000021835	Transcript	ENSBTAT00000107745	protein_coding	-	1/7	-	-	-	-	-	-	-	-	G	G/A/T	-	1	-	VGNC	-	-	-	-	-	-	-	-	-	-	-	-	Pregnancy_rate+Animal_QTLdb+107033	-	-	-	-	-
rs41565671	22:37221156-37221156	T	intron_variant	MODIFIER	PRICKLE2	ENSBTAG00000021835	Transcript	ENSBTAT00000107745	protein_coding	-	1/7	-	-	-	-	-	-	-	-	G	G/A/T	-	1	-	VGNC	-	-	-	-	-	-	-	-	-	-	-	-	Pregnancy_rate+Animal_QTLdb+107033	-	-	-	-	-
rs41565671	22:37221156-37221156	A	intron_variant	MODIFIER	PRICKLE2	ENSBTAG00000021835	Transcript	ENSBTAT00000119937	protein_coding	-	2/8	-	-	-	-	-	-	-	-	G	G/A/T	-	1	-	VGNC	-	-	-	-	-	P1	-	-	-	-	-	-	Pregnancy_rate+Animal_QTLdb+107033	-	-	-	-	-
rs41565671	22:37221156-37221156	T	intron_variant	MODIFIER	PRICKLE2	ENSBTAG00000021835	Transcript	ENSBTAT00000119937	protein_coding	-	2/8	-	-	-	-	-	-	-	-	G	G/A/T	-	1	-	VGNC	-	-	-	-	-	P1	-	-	-	-	-	-	Pregnancy_rate+Animal_QTLdb+107033	-	-	-	-	-
rs42231914	22:41433064-41433064	A	intron_variant	MODIFIER	FHIT	ENSBTAG00000014418	Transcript	ENSBTAT00000019177	protein_coding	-	5/6	-	-	-	-	-	-	-	-	G	G/A	-	1	-	VGNC	-	-	-	-	-	-	-	-	-	-	-	-	-	-	-	-	-	-
rs42231914	22:41433064-41433064	A	intron_variant	MODIFIER	FHIT	ENSBTAG00000014418	Transcript	ENSBTAT00000088146	protein_coding	-	5/5	-	-	-	-	-	-	-	-	G	G/A	-	1	-	VGNC	-	-	-	-	-	-	-	-	-	-	-	-	-	-	-	-	-	-
rs42231914	22:41433064-41433064	A	intron_variant	MODIFIER	FHIT	ENSBTAG00000014418	Transcript	ENSBTAT00000111272	protein_coding	-	4/5	-	-	-	-	-	-	-	-	G	G/A	-	1	-	VGNC	-	-	-	-	-	-	-	-	-	-	-	-	-	-	-	-	-	-
rs42231914	22:41433064-41433064	A	intron_variant	MODIFIER	FHIT	ENSBTAG00000014418	Transcript	ENSBTAT00000125840	protein_coding	-	8/9	-	-	-	-	-	-	-	-	G	G/A	-	1	-	VGNC	-	-	-	-	-	-	-	-	-	-	-	-	-	-	-	-	-	-
rs42231914	22:41433064-41433064	A	intron_variant	MODIFIER	FHIT	ENSBTAG00000014418	Transcript	ENSBTAT00000135099	protein_coding	-	6/7	-	-	-	-	-	-	-	-	G	G/A	-	1	-	VGNC	-	-	-	-	-	P1	-	-	-	-	-	-	-	-	-	-	-	-
rs29027914	22:45117370-45117370	G	intron_variant	MODIFIER	ERC2	ENSBTAG00000010029	Transcript	ENSBTAT00000013237	protein_coding	-	13/16	-	-	-	-	-	-	-	-	A	A/G	-	1	-	VGNC	-	-	-	-	-	-	-	-	-	-	-	-	-	-	-	-	-	-
rs29027914	22:45117370-45117370	G	intron_variant	MODIFIER	ERC2	ENSBTAG00000010029	Transcript	ENSBTAT00000076291	protein_coding	-	12/16	-	-	-	-	-	-	-	-	A	A/G	-	1	-	VGNC	-	-	-	-	-	-	-	-	-	-	-	-	-	-	-	-	-	-
rs29027914	22:45117370-45117370	G	intron_variant	MODIFIER	ERC2	ENSBTAG00000010029	Transcript	ENSBTAT00000083526	protein_coding	-	12/15	-	-	-	-	-	-	-	-	A	A/G	-	1	-	VGNC	-	-	-	-	-	-	-	-	-	-	-	-	-	-	-	-	-	-
rs29027914	22:45117370-45117370	G	intron_variant	MODIFIER	ERC2	ENSBTAG00000010029	Transcript	ENSBTAT00000085180	protein_coding	-	12/16	-	-	-	-	-	-	-	-	A	A/G	-	1	-	VGNC	-	-	-	-	-	-	-	-	-	-	-	-	-	-	-	-	-	-
rs29027914	22:45117370-45117370	G	intron_variant	MODIFIER	ERC2	ENSBTAG00000010029	Transcript	ENSBTAT00000086823	protein_coding	-	13/16	-	-	-	-	-	-	-	-	A	A/G	-	1	-	VGNC	-	-	-	-	-	P1	-	-	-	-	-	-	-	-	-	-	-	-
rs29027914	22:45117370-45117370	G	intron_variant	MODIFIER	ERC2	ENSBTAG00000010029	Transcript	ENSBTAT00000086838	protein_coding	-	13/16	-	-	-	-	-	-	-	-	A	A/G	-	1	-	VGNC	-	-	-	-	-	-	-	-	-	-	-	-	-	-	-	-	-	-
rs29027914	22:45117370-45117370	G	intron_variant	MODIFIER	ERC2	ENSBTAG00000010029	Transcript	ENSBTAT00000092191	protein_coding	-	12/15	-	-	-	-	-	-	-	-	A	A/G	-	1	-	VGNC	-	-	-	-	-	-	-	-	-	-	-	-	-	-	-	-	-	-
rs29027914	22:45117370-45117370	G	intron_variant	MODIFIER	ERC2	ENSBTAG00000010029	Transcript	ENSBTAT00000101345	protein_coding	-	13/16	-	-	-	-	-	-	-	-	A	A/G	-	1	-	VGNC	-	-	-	-	-	-	-	-	-	-	-	-	-	-	-	-	-	-
rs110744293	23:12146460-12146460	G	intron_variant	MODIFIER	BTBD9	ENSBTAG00000000529	Transcript	ENSBTAT00000000688	protein_coding	-	8/10	-	-	-	-	-	-	-	-	T	T/G	-	-1	-	VGNC	-	-	-	-	-	-	-	-	-	-	-	-	Stillbirth+OMIA+ENSBTAG00000000529	-	-	-	-	-
rs110744293	23:12146460-12146460	G	intron_variant	MODIFIER	BTBD9	ENSBTAG00000000529	Transcript	ENSBTAT00000078052	protein_coding	-	10/12	-	-	-	-	-	-	-	-	T	T/G	-	-1	-	VGNC	-	-	-	-	-	-	-	-	-	-	-	-	Stillbirth+OMIA+ENSBTAG00000000529	-	-	-	-	-
rs110744293	23:12146460-12146460	G	intron_variant	MODIFIER	BTBD9	ENSBTAG00000000529	Transcript	ENSBTAT00000130145	protein_coding	-	8/10	-	-	-	-	-	-	-	-	T	T/G	-	-1	-	VGNC	-	-	-	-	-	P1	-	-	-	-	-	-	Stillbirth+OMIA+ENSBTAG00000000529	-	-	-	-	-
rs110744293	23:12146460-12146460	G	intron_variant	MODIFIER	BTBD9	ENSBTAG00000000529	Transcript	ENSBTAT00000132303	protein_coding	-	9/11	-	-	-	-	-	-	-	-	T	T/G	-	-1	-	VGNC	-	-	-	-	-	-	-	-	-	-	-	-	Stillbirth+OMIA+ENSBTAG00000000529	-	-	-	-	-
rs110860468	23:17227354-17227354	A	upstream_gene_variant	MODIFIER	-	ENSBTAG00000050989	Transcript	ENSBTAT00000134596	lncRNA	-	-	-	-	-	-	-	-	-	-	G	G/A	7959	1	-	-	-	-	-	-	-	-	-	-	-	-	-	-	-	-	-	-	-	-
rs29026684	23:17696083-17696083	T	intron_variant	MODIFIER	CAPN11	ENSBTAG00000021066	Transcript	ENSBTAT00000004690	protein_coding	-	9/24	-	-	-	-	-	-	-	-	C	C/T	-	1	-	VGNC	-	-	-	-	-	P1	-	-	-	-	-	-	-	-	-	-	-	-
rs29026684	23:17696083-17696083	T	upstream_gene_variant	MODIFIER	-	ENSBTAG00000050117	Transcript	ENSBTAT00000076872	protein_coding	-	-	-	-	-	-	-	-	-	-	C	C/T	3754	-1	-	-	-	-	-	-	-	P1	-	-	-	-	-	-	-	-	-	-	-	-
rs41583931	24:11064065-11064065	C	intergenic_variant	MODIFIER	-	-	-	-	-	-	-	-	-	-	-	-	-	-	-	T	T/C	-	-	-	-	-	-	-	-	-	-	-	-	-	-	-	-	-	-	-	-	-	-
rs41257081	24:26063880-26063880	A	3_prime_UTR_variant	MODIFIER	DSC2	ENSBTAG00000040584	Transcript	ENSBTAT00000011306	protein_coding	16/16	-	-	-	3107	-	-	-	-	-	C	C/A	-	1	-	VGNC	-	-	-	-	-	P1	-	-	-	-	-	-	-	-	-	-	-	-
rs41257081	24:26063880-26063880	A	3_prime_UTR_variant	MODIFIER	DSC2	ENSBTAG00000040584	Transcript	ENSBTAT00000084805	protein_coding	17/17	-	-	-	3317	-	-	-	-	-	C	C/A	-	1	-	VGNC	-	-	-	-	-	-	-	-	-	-	-	-	-	-	-	-	-	-
rs109014975	24:56805748-56805748	T	intron_variant	MODIFIER	FECH	ENSBTAG00000006393	Transcript	ENSBTAT00000008384	protein_coding	-	4/10	-	-	-	-	-	-	-	-	C	C/T	-	-1	-	VGNC	-	-	-	-	-	-	-	-	-	-	-	-	Protoporphyria+OMIA+ENSBTAG00000006393	-	-	-	-	-
rs109014975	24:56805748-56805748	T	intron_variant	MODIFIER	FECH	ENSBTAG00000006393	Transcript	ENSBTAT00000078798	protein_coding	-	5/11	-	-	-	-	-	-	-	-	C	C/T	-	-1	-	VGNC	-	-	-	-	-	P1	-	-	-	-	-	-	Protoporphyria+OMIA+ENSBTAG00000006393	-	-	-	-	-
rs110489495	25:40246623-40246623	A	intron_variant,non_coding_transcript_variant	MODIFIER	-	ENSBTAG00000059451	Transcript	ENSBTAT00000098042	lncRNA	-	1/4	-	-	-	-	-	-	-	-	G	G/A	-	-1	-	-	-	-	-	-	-	-	-	-	-	-	-	-	-	-	-	-	-	-
rs110489495	25:40246623-40246623	A	intron_variant,non_coding_transcript_variant	MODIFIER	-	ENSBTAG00000059451	Transcript	ENSBTAT00000104269	lncRNA	-	1/2	-	-	-	-	-	-	-	-	G	G/A	-	-1	-	-	-	-	-	-	-	-	-	-	-	-	-	-	-	-	-	-	-	-
rs110489495	25:40246623-40246623	A	intron_variant,non_coding_transcript_variant	MODIFIER	-	ENSBTAG00000059451	Transcript	ENSBTAT00000128519	lncRNA	-	1/3	-	-	-	-	-	-	-	-	G	G/A	-	-1	-	-	-	-	-	-	-	-	-	-	-	-	-	-	-	-	-	-	-	-
rs110072536	25:40344012-40344012	G	intergenic_variant	MODIFIER	-	-	-	-	-	-	-	-	-	-	-	-	-	-	-	A	A/G	-	-	-	-	-	-	-	-	-	-	-	-	-	-	-	-	-	-	-	-	-	-
rs110519737	27:1908266-1908266	G	intergenic_variant	MODIFIER	-	-	-	-	-	-	-	-	-	-	-	-	-	-	-	A	A/G	-	-	-	-	-	-	-	-	-	-	-	-	-	-	-	-	-	-	-	-	-	-
rs133955943	28:31910046-31910046	A	intron_variant	MODIFIER	LRMDA	ENSBTAG00000052007	Transcript	ENSBTAT00000082983	protein_coding	-	4/6	-	-	-	-	-	-	-	-	G	G/A	-	1	-	HGNC	HGNC:23405	-	-	-	-	-	-	-	-	-	-	-	-	-	-	-	-	-
rs133955943	28:31910046-31910046	A	intron_variant	MODIFIER	LRMDA	ENSBTAG00000052007	Transcript	ENSBTAT00000108106	protein_coding	-	5/7	-	-	-	-	-	-	-	-	G	G/A	-	1	-	HGNC	HGNC:23405	-	-	-	-	P1	-	-	-	-	-	-	-	-	-	-	-	-
rs133082164	28:32373641-32373641	T	intergenic_variant	MODIFIER	-	-	-	-	-	-	-	-	-	-	-	-	-	-	-	G	G/T	-	-	-	-	-	-	-	-	-	-	-	-	-	-	-	-	-	-	-	-	-	-
rs110940666	28:34273514-34273514	C	intergenic_variant	MODIFIER	-	-	-	-	-	-	-	-	-	-	-	-	-	-	-	T	T/C	-	-	-	-	-	-	-	-	-	-	-	-	-	-	-	-	-	-	-	-	-	-
rs110236363	28:40662835-40662835	C	intron_variant	MODIFIER	GRID1	ENSBTAG00000019623	Transcript	ENSBTAT00000026142	protein_coding	-	6/16	-	-	-	-	-	-	-	-	T	T/C	-	-1	-	VGNC	-	-	-	-	-	-	-	-	-	-	-	-	-	-	-	-	-	-
rs110236363	28:40662835-40662835	C	intron_variant	MODIFIER	GRID1	ENSBTAG00000019623	Transcript	ENSBTAT00000100186	protein_coding	-	5/15	-	-	-	-	-	-	-	-	T	T/C	-	-1	-	VGNC	-	-	-	-	-	P1	-	-	-	-	-	-	-	-	-	-	-	-
rs110236363	28:40662835-40662835	C	intron_variant	MODIFIER	GRID1	ENSBTAG00000019623	Transcript	ENSBTAT00000127776	protein_coding	-	4/14	-	-	-	-	-	-	-	-	T	T/C	-	-1	-	VGNC	-	-	-	-	-	-	-	-	-	-	-	-	-	-	-	-	-	-
rs110411186	29:1461210-1461210	T	intron_variant	MODIFIER	DEUP1	ENSBTAG00000035110	Transcript	ENSBTAT00000049593	protein_coding	-	9/12	-	-	-	-	-	-	-	-	C	C/T	-	-1	-	VGNC	-	-	-	-	-	-	-	-	-	-	-	-	-	-	-	-	-	-
rs110411186	29:1461210-1461210	T	intron_variant	MODIFIER	DEUP1	ENSBTAG00000035110	Transcript	ENSBTAT00000095688	protein_coding	-	11/15	-	-	-	-	-	-	-	-	C	C/T	-	-1	-	VGNC	-	-	-	-	-	A2	-	-	-	-	-	-	-	-	-	-	-	-
rs110411186	29:1461210-1461210	T	intron_variant	MODIFIER	DEUP1	ENSBTAG00000035110	Transcript	ENSBTAT00000113980	protein_coding	-	10/13	-	-	-	-	-	-	-	-	C	C/T	-	-1	-	VGNC	-	-	-	-	-	-	-	-	-	-	-	-	-	-	-	-	-	-
rs110411186	29:1461210-1461210	T	intron_variant	MODIFIER	DEUP1	ENSBTAG00000035110	Transcript	ENSBTAT00000116978	protein_coding	-	11/14	-	-	-	-	-	-	-	-	C	C/T	-	-1	-	VGNC	-	-	-	-	-	P2	-	-	-	-	-	-	-	-	-	-	-	-
rs110411186	29:1461210-1461210	T	intron_variant	MODIFIER	DEUP1	ENSBTAG00000035110	Transcript	ENSBTAT00000118480	protein_coding	-	10/13	-	-	-	-	-	-	-	-	C	C/T	-	-1	-	VGNC	-	-	-	-	-	-	-	-	-	-	-	-	-	-	-	-	-	-
rs136280135	29:10014259-10014259	C	intron_variant	MODIFIER	DLG2	ENSBTAG00000027868	Transcript	ENSBTAT00000099962	protein_coding	-	2/27	-	-	-	-	-	-	-	-	A	A/C	-	1	-	VGNC	-	-	-	-	-	-	-	-	-	-	-	-	Conception_rate+Animal_QTLdb+177314	-	-	-	-	-
rs136280135	29:10014259-10014259	C	intron_variant	MODIFIER	DLG2	ENSBTAG00000027868	Transcript	ENSBTAT00000123569	protein_coding	-	2/28	-	-	-	-	-	-	-	-	A	A/C	-	1	-	VGNC	-	-	-	-	-	P1	-	-	-	-	-	-	Conception_rate+Animal_QTLdb+177314	-	-	-	-	-
rs42156900	29:10060800-10060800	G	intron_variant	MODIFIER	DLG2	ENSBTAG00000027868	Transcript	ENSBTAT00000099962	protein_coding	-	2/27	-	-	-	-	-	-	-	-	A	A/G	-	1	-	VGNC	-	-	-	-	-	-	-	-	-	-	-	-	-	-	-	-	-	-
rs42156900	29:10060800-10060800	G	intron_variant	MODIFIER	DLG2	ENSBTAG00000027868	Transcript	ENSBTAT00000123569	protein_coding	-	2/28	-	-	-	-	-	-	-	-	A	A/G	-	1	-	VGNC	-	-	-	-	-	P1	-	-	-	-	-	-	-	-	-	-	-	-
rs41991317	29:10158153-10158153	G	intron_variant	MODIFIER	DLG2	ENSBTAG00000027868	Transcript	ENSBTAT00000099962	protein_coding	-	2/27	-	-	-	-	-	-	-	-	A	A/G	-	1	-	VGNC	-	-	-	-	-	-	-	-	-	-	-	-	-	-	-	-	-	-
rs41991317	29:10158153-10158153	G	intron_variant	MODIFIER	DLG2	ENSBTAG00000027868	Transcript	ENSBTAT00000123569	protein_coding	-	2/28	-	-	-	-	-	-	-	-	A	A/G	-	1	-	VGNC	-	-	-	-	-	P1	-	-	-	-	-	-	-	-	-	-	-	-
rs42159980	29:10258760-10258760	T	intron_variant	MODIFIER	DLG2	ENSBTAG00000027868	Transcript	ENSBTAT00000099962	protein_coding	-	3/27	-	-	-	-	-	-	-	-	G	G/T	-	1	-	VGNC	-	-	-	-	-	-	-	-	-	-	-	-	-	-	-	-	-	-
rs42159980	29:10258760-10258760	T	intron_variant	MODIFIER	DLG2	ENSBTAG00000027868	Transcript	ENSBTAT00000123569	protein_coding	-	3/28	-	-	-	-	-	-	-	-	G	G/T	-	1	-	VGNC	-	-	-	-	-	P1	-	-	-	-	-	-	-	-	-	-	-	-
rs133546012	29:11230618-11230618	C	intron_variant	MODIFIER	DLG2	ENSBTAG00000027868	Transcript	ENSBTAT00000080082	protein_coding	-	2/23	-	-	-	-	-	-	-	-	T	T/C	-	1	-	VGNC	-	-	-	-	-	-	-	-	-	-	-	-	-	-	-	-	-	-
rs133546012	29:11230618-11230618	C	intron_variant	MODIFIER	DLG2	ENSBTAG00000027868	Transcript	ENSBTAT00000087032	protein_coding	-	2/22	-	-	-	-	-	-	-	-	T	T/C	-	1	-	VGNC	-	-	-	-	-	-	-	-	-	-	-	-	-	-	-	-	-	-
rs133546012	29:11230618-11230618	C	intron_variant	MODIFIER	DLG2	ENSBTAG00000027868	Transcript	ENSBTAT00000099962	protein_coding	-	7/27	-	-	-	-	-	-	-	-	T	T/C	-	1	-	VGNC	-	-	-	-	-	-	-	-	-	-	-	-	-	-	-	-	-	-
rs133546012	29:11230618-11230618	C	intron_variant	MODIFIER	DLG2	ENSBTAG00000027868	Transcript	ENSBTAT00000101205	protein_coding	-	1/21	-	-	-	-	-	-	-	-	T	T/C	-	1	-	VGNC	-	-	-	-	-	-	-	-	-	-	-	-	-	-	-	-	-	-
rs133546012	29:11230618-11230618	C	intron_variant	MODIFIER	DLG2	ENSBTAG00000027868	Transcript	ENSBTAT00000102019	protein_coding	-	2/22	-	-	-	-	-	-	-	-	T	T/C	-	1	-	VGNC	-	-	-	-	-	-	-	-	-	-	-	-	-	-	-	-	-	-
rs133546012	29:11230618-11230618	C	intron_variant	MODIFIER	DLG2	ENSBTAG00000027868	Transcript	ENSBTAT00000102934	protein_coding	-	3/22	-	-	-	-	-	-	-	-	T	T/C	-	1	-	VGNC	-	-	-	-	-	-	-	-	-	-	-	-	-	-	-	-	-	-
rs133546012	29:11230618-11230618	C	intron_variant	MODIFIER	DLG2	ENSBTAG00000027868	Transcript	ENSBTAT00000123569	protein_coding	-	8/28	-	-	-	-	-	-	-	-	T	T/C	-	1	-	VGNC	-	-	-	-	-	P1	-	-	-	-	-	-	-	-	-	-	-	-
rs135984630	29:15706087-15706087	C	intergenic_variant	MODIFIER	-	-	-	-	-	-	-	-	-	-	-	-	-	-	-	T	T/C	-	-	-	-	-	-	-	-	-	-	-	-	-	-	-	-	-	-	-	-	-	-
rs29022132	29:16200746-16200746	G	intergenic_variant	MODIFIER	-	-	-	-	-	-	-	-	-	-	-	-	-	-	-	A	A/G	-	-	-	-	-	-	-	-	-	-	-	-	-	-	-	-	-	-	-	-	-	-
rs110392437	29:16796262-16796262	A	intron_variant	MODIFIER	TENM4	ENSBTAG00000007439	Transcript	ENSBTAT00000071352	protein_coding	-	2/31	-	-	-	-	-	-	-	-	G	G/A	-	1	-	VGNC	-	-	-	-	-	-	-	-	-	-	-	-	-	-	-	-	-	-
rs110392437	29:16796262-16796262	A	intron_variant	MODIFIER	TENM4	ENSBTAG00000007439	Transcript	ENSBTAT00000080230	protein_coding	-	2/30	-	-	-	-	-	-	-	-	G	G/A	-	1	-	VGNC	-	-	-	-	-	-	-	-	-	-	-	-	-	-	-	-	-	-
rs135359671	29:16882756-16882756	T	intron_variant	MODIFIER	TENM4	ENSBTAG00000007439	Transcript	ENSBTAT00000061315	protein_coding	-	1/31	-	-	-	-	-	-	-	-	C	C/T	-	1	-	VGNC	-	-	-	-	-	-	-	-	-	-	-	-	-	-	-	-	-	-
rs135359671	29:16882756-16882756	T	intron_variant	MODIFIER	TENM4	ENSBTAG00000007439	Transcript	ENSBTAT00000071352	protein_coding	-	3/31	-	-	-	-	-	-	-	-	C	C/T	-	1	-	VGNC	-	-	-	-	-	-	-	-	-	-	-	-	-	-	-	-	-	-
rs135359671	29:16882756-16882756	T	intron_variant	MODIFIER	TENM4	ENSBTAG00000007439	Transcript	ENSBTAT00000077146	protein_coding	-	1/29	-	-	-	-	-	-	-	-	C	C/T	-	1	-	VGNC	-	-	-	-	-	-	-	-	-	-	-	-	-	-	-	-	-	-
rs135359671	29:16882756-16882756	T	intron_variant	MODIFIER	TENM4	ENSBTAG00000007439	Transcript	ENSBTAT00000080230	protein_coding	-	3/30	-	-	-	-	-	-	-	-	C	C/T	-	1	-	VGNC	-	-	-	-	-	-	-	-	-	-	-	-	-	-	-	-	-	-
rs135359671	29:16882756-16882756	T	intron_variant	MODIFIER	TENM4	ENSBTAG00000007439	Transcript	ENSBTAT00000086133	protein_coding	-	1/30	-	-	-	-	-	-	-	-	C	C/T	-	1	-	VGNC	-	-	-	-	-	P1	-	-	-	-	-	-	-	-	-	-	-	-
rs109868969	29:17135246-17135246	T	intron_variant	MODIFIER	TENM4	ENSBTAG00000007439	Transcript	ENSBTAT00000061315	protein_coding	-	4/31	-	-	-	-	-	-	-	-	C	C/T	-	1	-	VGNC	-	-	-	-	-	-	-	-	-	-	-	-	-	-	-	-	-	-
rs109868969	29:17135246-17135246	T	intron_variant	MODIFIER	TENM4	ENSBTAG00000007439	Transcript	ENSBTAT00000071352	protein_coding	-	6/31	-	-	-	-	-	-	-	-	C	C/T	-	1	-	VGNC	-	-	-	-	-	-	-	-	-	-	-	-	-	-	-	-	-	-
rs109868969	29:17135246-17135246	T	intron_variant	MODIFIER	TENM4	ENSBTAG00000007439	Transcript	ENSBTAT00000077146	protein_coding	-	5/29	-	-	-	-	-	-	-	-	C	C/T	-	1	-	VGNC	-	-	-	-	-	-	-	-	-	-	-	-	-	-	-	-	-	-
rs109868969	29:17135246-17135246	T	intron_variant	MODIFIER	TENM4	ENSBTAG00000007439	Transcript	ENSBTAT00000080230	protein_coding	-	6/30	-	-	-	-	-	-	-	-	C	C/T	-	1	-	VGNC	-	-	-	-	-	-	-	-	-	-	-	-	-	-	-	-	-	-
rs109868969	29:17135246-17135246	T	intron_variant	MODIFIER	TENM4	ENSBTAG00000007439	Transcript	ENSBTAT00000086133	protein_coding	-	5/30	-	-	-	-	-	-	-	-	C	C/T	-	1	-	VGNC	-	-	-	-	-	P1	-	-	-	-	-	-	-	-	-	-	-	-
rs109400388	29:19311833-19311833	C	intergenic_variant	MODIFIER	-	-	-	-	-	-	-	-	-	-	-	-	-	-	-	T	T/C	-	-	-	-	-	-	-	-	-	-	-	-	-	-	-	-	-	-	-	-	-	-
rs136226092	29:19332337-19332337	T	intergenic_variant	MODIFIER	-	-	-	-	-	-	-	-	-	-	-	-	-	-	-	C	C/T	-	-	-	-	-	-	-	-	-	-	-	-	-	-	-	-	-	-	-	-	-	-
rs42170441	29:20347171-20347171	A	intron_variant	MODIFIER	LUZP2	ENSBTAG00000001043	Transcript	ENSBTAT00000001385	protein_coding	-	2/9	-	-	-	-	-	-	-	-	C	C/A	-	-1	-	VGNC	-	-	-	-	-	-	-	-	-	-	-	-	-	-	-	-	-	-
rs42170441	29:20347171-20347171	A	intron_variant	MODIFIER	LUZP2	ENSBTAG00000001043	Transcript	ENSBTAT00000077620	protein_coding	-	4/11	-	-	-	-	-	-	-	-	C	C/A	-	-1	-	VGNC	-	-	-	-	-	A2	-	-	-	-	-	-	-	-	-	-	-	-
rs42170441	29:20347171-20347171	A	intron_variant	MODIFIER	LUZP2	ENSBTAG00000001043	Transcript	ENSBTAT00000084937	protein_coding	-	2/9	-	-	-	-	-	-	-	-	C	C/A	-	-1	-	VGNC	-	-	-	-	-	-	-	-	-	-	-	-	-	-	-	-	-	-
rs42170441	29:20347171-20347171	A	intron_variant	MODIFIER	LUZP2	ENSBTAG00000001043	Transcript	ENSBTAT00000111978	protein_coding	-	4/11	-	-	-	-	-	-	-	-	C	C/A	-	-1	-	VGNC	-	-	-	-	-	P2	-	-	-	-	-	-	-	-	-	-	-	-
rs110252499	29:20397429-20397429	G	intron_variant	MODIFIER	LUZP2	ENSBTAG00000001043	Transcript	ENSBTAT00000077620	protein_coding	-	1/11	-	-	-	-	-	-	-	-	A	A/G	-	-1	-	VGNC	-	-	-	-	-	A2	-	-	-	-	-	-	Residual_feed_intake+Animal_QTLdb+167195,Residual_feed_intake+Animal_QTLdb+21099	-	-	-	-	-
rs110252499	29:20397429-20397429	G	intron_variant	MODIFIER	LUZP2	ENSBTAG00000001043	Transcript	ENSBTAT00000111978	protein_coding	-	1/11	-	-	-	-	-	-	-	-	A	A/G	-	-1	-	VGNC	-	-	-	-	-	P2	-	-	-	-	-	-	Residual_feed_intake+Animal_QTLdb+167195,Residual_feed_intake+Animal_QTLdb+21099	-	-	-	-	-
rs42517435	29:23276174-23276174	A	intron_variant	MODIFIER	NELL1	ENSBTAG00000050228	Transcript	ENSBTAT00000076002	protein_coding	-	16/18	-	-	-	-	-	-	-	-	G	G/A	-	-1	-	HGNC	HGNC:7750	-	-	-	-	-	-	-	-	-	-	-	-	-	-	-	-	-
rs42517435	29:23276174-23276174	A	intron_variant	MODIFIER	NELL1	ENSBTAG00000050228	Transcript	ENSBTAT00000081391	protein_coding	-	16/18	-	-	-	-	-	-	-	-	G	G/A	-	-1	-	HGNC	HGNC:7750	-	-	-	-	-	-	-	-	-	-	-	-	-	-	-	-	-
rs42517435	29:23276174-23276174	A	intron_variant	MODIFIER	NELL1	ENSBTAG00000050228	Transcript	ENSBTAT00000081694	protein_coding	-	17/19	-	-	-	-	-	-	-	-	G	G/A	-	-1	-	HGNC	HGNC:7750	-	-	-	-	P1	-	-	-	-	-	-	-	-	-	-	-	-
rs42517435	29:23276174-23276174	A	intron_variant	MODIFIER	-	ENSBTAG00000068053	Transcript	ENSBTAT00000118617	protein_coding	-	3/3	-	-	-	-	-	-	-	-	G	G/A	-	1	-	-	-	-	-	-	-	P1	-	-	-	-	-	-	-	-	-	-	-	-
rs42165802	29:34208123-34208123	C	intron_variant	MODIFIER	OPCML	ENSBTAG00000020769	Transcript	ENSBTAT00000027678	protein_coding	-	2/7	-	-	-	-	-	-	-	-	A	A/C	-	1	-	VGNC	-	-	-	-	-	-	-	-	-	-	-	-	-	-	-	-	-	-
rs42165802	29:34208123-34208123	C	intron_variant	MODIFIER	OPCML	ENSBTAG00000020769	Transcript	ENSBTAT00000083522	protein_coding	-	1/6	-	-	-	-	-	-	-	-	A	A/C	-	1	-	VGNC	-	-	-	-	-	P4	-	-	-	-	-	-	-	-	-	-	-	-
rs42165802	29:34208123-34208123	C	intron_variant	MODIFIER	OPCML	ENSBTAG00000020769	Transcript	ENSBTAT00000130518	protein_coding	-	1/7	-	-	-	-	-	-	-	-	A	A/C	-	1	-	VGNC	-	-	-	-	-	A1	-	-	-	-	-	-	-	-	-	-	-	-
rs3423094226	29:35951280-35951280	G	intergenic_variant	MODIFIER	-	-	-	-	-	-	-	-	-	-	-	-	-	-	-	A	A/G	-	-	-	-	-	-	-	-	-	-	-	-	-	-	-	-	-	-	-	-	-	-
rs42356858	4:29402377-29402377	C	intron_variant	MODIFIER	ABCB5	ENSBTAG00000002595	Transcript	ENSBTAT00000031698	protein_coding	-	15/28	-	-	-	-	-	-	-	-	T	T/C	-	1	-	VGNC	-	-	-	-	-	P1	-	-	-	-	-	-	-	-	-	-	-	-
rs42356858	4:29402377-29402377	C	intron_variant	MODIFIER	ABCB5	ENSBTAG00000002595	Transcript	ENSBTAT00000112221	protein_coding	-	2/2	-	-	-	-	-	-	-	-	T	T/C	-	1	-	VGNC	-	-	-	-	-	-	-	-	-	-	-	-	-	-	-	-	-	-
rs42356858	4:29402377-29402377	C	downstream_gene_variant	MODIFIER	ABCB5	ENSBTAG00000002595	Transcript	ENSBTAT00000118846	protein_coding	-	-	-	-	-	-	-	-	-	-	T	T/C	8298	1	-	VGNC	-	-	-	-	-	-	-	-	-	-	-	-	-	-	-	-	-	-
rs41572920	4:29426122-29426122	G	synonymous_variant	LOW	ABCB5	ENSBTAG00000002595	Transcript	ENSBTAT00000031698	protein_coding	18/29	-	-	-	2034	2034	678	L	ttA/ttG	-	A	A/G	-	1	-	VGNC	-	-	-	-	-	P1	-	-	-	-	-	-	-	-	-	-	-	-
rs43382298	4:31715516-31715516	T	intergenic_variant	MODIFIER	-	-	-	-	-	-	-	-	-	-	-	-	-	-	-	C	C/T	-	-	-	-	-	-	-	-	-	-	-	-	-	-	-	-	-	-	-	-	-	-
rs109231323	5:101827622-101827622	G	downstream_gene_variant	MODIFIER	CD163	ENSBTAG00000019669	Transcript	ENSBTAT00000026215	protein_coding	-	-	-	-	-	-	-	-	-	-	A	A/G	8507	1	-	EntrezGene	-	-	-	-	-	A2	-	-	-	-	-	-	Milk_fat_percentage+Animal_QTLdb+173559,Milk_fat_yield+Animal_QTLdb+174090,Milk_fat_yield+Animal_QTLdb+243638,Milk_fat_percentage+Animal_QTLdb+245801	-	-	-	-	-
rs109231323	5:101827622-101827622	G	intron_variant	MODIFIER	-	ENSBTAG00000053242	Transcript	ENSBTAT00000078816	protein_coding	-	3/3	-	-	-	-	-	-	-	-	A	A/G	-	-1	-	-	-	-	-	-	-	P1	-	-	-	-	-	-	Milk_fat_percentage+Animal_QTLdb+173559,Milk_fat_yield+Animal_QTLdb+174090,Milk_fat_yield+Animal_QTLdb+243638,Milk_fat_percentage+Animal_QTLdb+245801	-	-	-	-	-
rs109231323	5:101827622-101827622	G	downstream_gene_variant	MODIFIER	CD163	ENSBTAG00000019669	Transcript	ENSBTAT00000084624	protein_coding	-	-	-	-	-	-	-	-	-	-	A	A/G	9576	1	-	EntrezGene	-	-	-	-	-	-	-	-	-	-	-	-	Milk_fat_percentage+Animal_QTLdb+173559,Milk_fat_yield+Animal_QTLdb+174090,Milk_fat_yield+Animal_QTLdb+243638,Milk_fat_percentage+Animal_QTLdb+245801	-	-	-	-	-
rs109231323	5:101827622-101827622	G	upstream_gene_variant	MODIFIER	-	ENSBTAG00000064020	Transcript	ENSBTAT00000096119	protein_coding	-	-	-	-	-	-	-	-	-	-	A	A/G	4252	-1	-	-	-	-	-	-	-	P1	-	-	-	-	-	-	Milk_fat_percentage+Animal_QTLdb+173559,Milk_fat_yield+Animal_QTLdb+174090,Milk_fat_yield+Animal_QTLdb+243638,Milk_fat_percentage+Animal_QTLdb+245801	-	-	-	-	-
rs109231323	5:101827622-101827622	G	downstream_gene_variant	MODIFIER	CD163	ENSBTAG00000019669	Transcript	ENSBTAT00000099429	protein_coding	-	-	-	-	-	-	-	-	-	-	A	A/G	5039	1	-	EntrezGene	-	-	-	-	-	P2	-	-	-	-	-	-	Milk_fat_percentage+Animal_QTLdb+173559,Milk_fat_yield+Animal_QTLdb+174090,Milk_fat_yield+Animal_QTLdb+243638,Milk_fat_percentage+Animal_QTLdb+245801	-	-	-	-	-
rs109231323	5:101827622-101827622	G	downstream_gene_variant	MODIFIER	CD163	ENSBTAG00000019669	Transcript	ENSBTAT00000114354	protein_coding	-	-	-	-	-	-	-	-	-	-	A	A/G	8507	1	-	EntrezGene	-	-	-	-	-	-	-	-	-	-	-	-	Milk_fat_percentage+Animal_QTLdb+173559,Milk_fat_yield+Animal_QTLdb+174090,Milk_fat_yield+Animal_QTLdb+243638,Milk_fat_percentage+Animal_QTLdb+245801	-	-	-	-	-
rs109944456	5:106540440-106540440	A	intron_variant	MODIFIER	TSPAN11	ENSBTAG00000020699	Transcript	ENSBTAT00000042839	protein_coding	-	5/7	-	-	-	-	-	-	-	-	C	C/A	-	1	-	VGNC	-	-	-	-	-	P1	-	-	-	-	-	-	Body_weight_gain+Animal_QTLdb+67091	-	-	-	-	-
rs109944456	5:106540440-106540440	A	upstream_gene_variant	MODIFIER	-	ENSBTAG00000069293	Transcript	ENSBTAT00000103757	lncRNA	-	-	-	-	-	-	-	-	-	-	C	C/A	8145	1	-	-	-	-	-	-	-	-	-	-	-	-	-	-	Body_weight_gain+Animal_QTLdb+67091	-	-	-	-	-
rs109944456	5:106540440-106540440	A	intron_variant	MODIFIER	TSPAN11	ENSBTAG00000020699	Transcript	ENSBTAT00000103851	protein_coding	-	4/6	-	-	-	-	-	-	-	-	C	C/A	-	1	-	VGNC	-	-	-	-	-	-	-	-	-	-	-	-	Body_weight_gain+Animal_QTLdb+67091	-	-	-	-	-
rs109944456	5:106540440-106540440	A	intron_variant	MODIFIER	TSPAN11	ENSBTAG00000020699	Transcript	ENSBTAT00000131955	protein_coding	-	3/5	-	-	-	-	-	-	-	-	C	C/A	-	1	-	VGNC	-	-	-	-	-	-	-	-	-	-	-	-	Body_weight_gain+Animal_QTLdb+67091	-	-	-	-	-
rs109944456	5:106540440-106540440	A	intron_variant	MODIFIER	TSPAN11	ENSBTAG00000020699	Transcript	ENSBTAT00000135555	protein_coding	-	3/5	-	-	-	-	-	-	-	-	C	C/A	-	1	-	VGNC	-	-	-	-	-	-	-	-	-	-	-	-	Body_weight_gain+Animal_QTLdb+67091	-	-	-	-	-
rs109195477	5:106751379-106751379	T	upstream_gene_variant	MODIFIER	TSPAN9	ENSBTAG00000049163	Transcript	ENSBTAT00000067516	protein_coding	-	-	-	-	-	-	-	-	-	-	C	C/T	7623	-1	-	VGNC	-	-	-	-	-	A2	-	-	-	-	-	-	-	-	-	-	-	-
rs109195477	5:106751379-106751379	T	intron_variant	MODIFIER	-	ENSBTAG00000060879	Transcript	ENSBTAT00000108997	protein_coding	-	1/1	-	-	-	-	-	-	-	-	C	C/T	-	1	-	-	-	-	-	-	-	P1	-	-	-	-	-	-	-	-	-	-	-	-
rs109195477	5:106751379-106751379	T	regulatory_region_variant	MODIFIER	-	-	RegulatoryFeature	ENSBTAR5_855Q3D	enhancer	-	-	-	-	-	-	-	-	-	-	C	C/T	-	-	-	-	-	-	-	-	-	-	-	-	-	-	-	-	-	-	-	-	-	-
rs109833545	5:106784655-106784655	G	intron_variant	MODIFIER	TEAD4	ENSBTAG00000019788	Transcript	ENSBTAT00000036296	protein_coding	-	4/11	-	-	-	-	-	-	-	-	T	T/G	-	-1	-	VGNC	-	-	-	-	-	P4	-	-	-	-	-	-	-	-	-	-	-	-
rs109833545	5:106784655-106784655	G	intron_variant	MODIFIER	TEAD4	ENSBTAG00000019788	Transcript	ENSBTAT00000074335	protein_coding	-	5/12	-	-	-	-	-	-	-	-	T	T/G	-	-1	-	VGNC	-	-	-	-	-	A2	-	-	-	-	-	-	-	-	-	-	-	-
rs109833545	5:106784655-106784655	G	intron_variant	MODIFIER	TEAD4	ENSBTAG00000019788	Transcript	ENSBTAT00000081917	protein_coding	-	4/10	-	-	-	-	-	-	-	-	T	T/G	-	-1	-	VGNC	-	-	-	-	-	-	-	-	-	-	-	-	-	-	-	-	-	-
rs109833545	5:106784655-106784655	G	intron_variant	MODIFIER	TEAD4	ENSBTAG00000019788	Transcript	ENSBTAT00000105619	protein_coding	-	4/11	-	-	-	-	-	-	-	-	T	T/G	-	-1	-	VGNC	-	-	-	-	-	-	-	-	-	-	-	-	-	-	-	-	-	-
rs109833545	5:106784655-106784655	G	intron_variant	MODIFIER	-	ENSBTAG00000060879	Transcript	ENSBTAT00000108997	protein_coding	-	1/1	-	-	-	-	-	-	-	-	T	T/G	-	1	-	-	-	-	-	-	-	P1	-	-	-	-	-	-	-	-	-	-	-	-
rs109833545	5:106784655-106784655	G	intron_variant	MODIFIER	TEAD4	ENSBTAG00000019788	Transcript	ENSBTAT00000121484	protein_coding	-	4/11	-	-	-	-	-	-	-	-	T	T/G	-	-1	-	VGNC	-	-	-	-	-	A2	-	-	-	-	-	-	-	-	-	-	-	-
rs109833545	5:106784655-106784655	G	intron_variant	MODIFIER	TEAD4	ENSBTAG00000019788	Transcript	ENSBTAT00000132119	protein_coding	-	4/11	-	-	-	-	-	-	-	-	T	T/G	-	-1	-	VGNC	-	-	-	-	-	A2	-	-	-	-	-	-	-	-	-	-	-	-
rs109833545	5:106784655-106784655	G	intron_variant	MODIFIER	TEAD4	ENSBTAG00000019788	Transcript	ENSBTAT00000135761	protein_coding	-	6/13	-	-	-	-	-	-	-	-	T	T/G	-	-1	-	VGNC	-	-	-	-	-	A2	-	-	-	-	-	-	-	-	-	-	-	-
rs109408961	5:107017550-107017550	G	upstream_gene_variant	MODIFIER	WASHC1	ENSBTAG00000011902	Transcript	ENSBTAT00000015790	protein_coding	-	-	-	-	-	-	-	-	-	-	A	A/G	3019	-1	-	EntrezGene	-	-	-	-	-	-	-	-	-	-	-	-	-	-	-	-	-	-
rs109408961	5:107017550-107017550	G	upstream_gene_variant	MODIFIER	WASHC1	ENSBTAG00000011902	Transcript	ENSBTAT00000069933	protein_coding	-	-	-	-	-	-	-	-	-	-	A	A/G	3019	-1	-	EntrezGene	-	-	-	-	-	P1	-	-	-	-	-	-	-	-	-	-	-	-
rs109408961	5:107017550-107017550	G	upstream_gene_variant	MODIFIER	WASHC1	ENSBTAG00000011902	Transcript	ENSBTAT00000104981	protein_coding	-	-	-	-	-	-	-	-	-	-	A	A/G	2979	-1	-	EntrezGene	-	-	-	-	-	-	-	-	-	-	-	-	-	-	-	-	-	-
rs109966461	5:107060379-107060379	A	intron_variant	MODIFIER	IQSEC3	ENSBTAG00000019058	Transcript	ENSBTAT00000025372	protein_coding	-	1/13	-	-	-	-	-	-	-	-	G	G/A	-	1	-	VGNC	-	-	-	-	-	P1	-	-	-	-	-	-	-	-	-	-	-	-
rs109966461	5:107060379-107060379	A	intron_variant	MODIFIER	-	ENSBTAG00000023274	Transcript	ENSBTAT00000026400	protein_coding	-	1/1	-	-	-	-	-	-	-	-	G	G/A	-	1	-	-	-	-	-	-	-	P1	-	-	-	-	-	-	-	-	-	-	-	-
rs109892864	5:109923576-109923576	G	intron_variant	MODIFIER	PLA2G6	ENSBTAG00000014015	Transcript	ENSBTAT00000037697	protein_coding	-	5/17	-	-	-	-	-	-	-	-	A	A/G	-	-1	-	VGNC	-	-	-	-	-	A2	-	-	-	-	-	-	Milk_protein_yield+Animal_QTLdb+175410	-	-	-	-	-
rs109892864	5:109923576-109923576	G	intron_variant	MODIFIER	PLA2G6	ENSBTAG00000014015	Transcript	ENSBTAT00000067616	protein_coding	-	4/15	-	-	-	-	-	-	-	-	A	A/G	-	-1	-	VGNC	-	-	-	-	-	P2	-	-	-	-	-	-	Milk_protein_yield+Animal_QTLdb+175410	-	-	-	-	-
rs109892864	5:109923576-109923576	G	intron_variant	MODIFIER	PLA2G6	ENSBTAG00000014015	Transcript	ENSBTAT00000069092	protein_coding	-	4/15	-	-	-	-	-	-	-	-	A	A/G	-	-1	-	VGNC	-	-	-	-	-	-	-	-	-	-	-	-	Milk_protein_yield+Animal_QTLdb+175410	-	-	-	-	-
rs109892864	5:109923576-109923576	G	intron_variant	MODIFIER	PLA2G6	ENSBTAG00000014015	Transcript	ENSBTAT00000115735	protein_coding	-	4/16	-	-	-	-	-	-	-	-	A	A/G	-	-1	-	VGNC	-	-	-	-	-	A2	-	-	-	-	-	-	Milk_protein_yield+Animal_QTLdb+175410	-	-	-	-	-
rs109892864	5:109923576-109923576	G	intron_variant	MODIFIER	PLA2G6	ENSBTAG00000014015	Transcript	ENSBTAT00000117756	protein_coding	-	5/16	-	-	-	-	-	-	-	-	A	A/G	-	-1	-	VGNC	-	-	-	-	-	-	-	-	-	-	-	-	Milk_protein_yield+Animal_QTLdb+175410	-	-	-	-	-
rs109892864	5:109923576-109923576	G	intron_variant	MODIFIER	PLA2G6	ENSBTAG00000014015	Transcript	ENSBTAT00000118432	protein_coding	-	4/17	-	-	-	-	-	-	-	-	A	A/G	-	-1	-	VGNC	-	-	-	-	-	-	-	-	-	-	-	-	Milk_protein_yield+Animal_QTLdb+175410	-	-	-	-	-
rs109892864	5:109923576-109923576	G	intron_variant	MODIFIER	PLA2G6	ENSBTAG00000014015	Transcript	ENSBTAT00000132343	protein_coding	-	4/17	-	-	-	-	-	-	-	-	A	A/G	-	-1	-	VGNC	-	-	-	-	-	A2	-	-	-	-	-	-	Milk_protein_yield+Animal_QTLdb+175410	-	-	-	-	-
rs109147973	5:111344131-111344131	T	intergenic_variant	MODIFIER	-	-	-	-	-	-	-	-	-	-	-	-	-	-	-	C	C/T	-	-	-	-	-	-	-	-	-	-	-	-	-	-	-	-	-	-	-	-	-	-
rs379201999	5:119239442-119239442	G	synonymous_variant	LOW	BRD1	ENSBTAG00000046760	Transcript	ENSBTAT00000065149	protein_coding	2/13	-	-	-	1228	1029	343	A	gcT/gcC	-	A	A/G	-	-1	-	VGNC	-	-	-	-	-	A1	-	-	-	-	-	-	-	-	-	-	-	-
rs379201999	5:119239442-119239442	G	synonymous_variant	LOW	BRD1	ENSBTAG00000046760	Transcript	ENSBTAT00000080884	protein_coding	3/14	-	-	-	1355	1029	343	A	gcT/gcC	-	A	A/G	-	-1	-	VGNC	-	-	-	-	-	P4	-	-	-	-	-	-	-	-	-	-	-	-
rs379201999	5:119239442-119239442	G	synonymous_variant	LOW	BRD1	ENSBTAG00000046760	Transcript	ENSBTAT00000085040	protein_coding	1/9	-	-	-	1228	1029	343	A	gcT/gcC	-	A	A/G	-	-1	-	VGNC	-	-	-	-	-	-	-	-	-	-	-	-	-	-	-	-	-	-
rs379201999	5:119239442-119239442	G	synonymous_variant	LOW	BRD1	ENSBTAG00000046760	Transcript	ENSBTAT00000087664	protein_coding	2/12	-	-	-	1228	1029	343	A	gcT/gcC	-	A	A/G	-	-1	-	VGNC	-	-	-	-	-	-	-	-	-	-	-	-	-	-	-	-	-	-
rs379201999	5:119239442-119239442	G	synonymous_variant	LOW	BRD1	ENSBTAG00000046760	Transcript	ENSBTAT00000129479	protein_coding	2/13	-	-	-	1400	1257	419	A	gcT/gcC	-	A	A/G	-	-1	-	VGNC	-	-	-	-	-	-	-	-	-	-	-	-	-	-	-	-	-	-
rs3423094263	5:120055511-120055511	C	3_prime_UTR_variant	MODIFIER	RABL2B	ENSBTAG00000004876	Transcript	ENSBTAT00000006412	protein_coding	9/9	-	-	-	910	-	-	-	-	-	T	T/C	-	1	-	EntrezGene	-	-	-	-	-	P1	-	-	-	-	-	-	-	-	-	-	-	-
rs3423094263	5:120055511-120055511	C	3_prime_UTR_variant	MODIFIER	RABL2B	ENSBTAG00000004876	Transcript	ENSBTAT00000075402	protein_coding	7/7	-	-	-	718	-	-	-	-	-	T	T/C	-	1	-	EntrezGene	-	-	-	-	-	-	-	-	-	-	-	-	-	-	-	-	-	-
rs3423094263	5:120055511-120055511	C	upstream_gene_variant	MODIFIER	-	ENSBTAG00000059197	Transcript	ENSBTAT00000132932	lncRNA	-	-	-	-	-	-	-	-	-	-	T	T/C	7178	1	-	-	-	-	-	-	-	-	-	-	-	-	-	-	-	-	-	-	-	-
rs41595953	6:40780850-40780850	T	intron_variant	MODIFIER	KCNIP4	ENSBTAG00000047743	Transcript	ENSBTAT00000072768	protein_coding	-	1/7	-	-	-	-	-	-	-	-	C	C/T	-	-1	-	VGNC	-	-	-	-	-	-	-	-	-	-	-	-	Body_weight+Animal_QTLdb+67518,Body_weight+Animal_QTLdb+67519	-	-	-	-	-
rs41595953	6:40780850-40780850	T	intron_variant	MODIFIER	KCNIP4	ENSBTAG00000047743	Transcript	ENSBTAT00000076235	protein_coding	-	1/8	-	-	-	-	-	-	-	-	C	C/T	-	-1	-	VGNC	-	-	-	-	-	-	-	-	-	-	-	-	Body_weight+Animal_QTLdb+67518,Body_weight+Animal_QTLdb+67519	-	-	-	-	-
rs41595953	6:40780850-40780850	T	intron_variant	MODIFIER	KCNIP4	ENSBTAG00000047743	Transcript	ENSBTAT00000103235	protein_coding	-	1/7	-	-	-	-	-	-	-	-	C	C/T	-	-1	-	VGNC	-	-	-	-	-	P4	-	-	-	-	-	-	Body_weight+Animal_QTLdb+67518,Body_weight+Animal_QTLdb+67519	-	-	-	-	-
rs41595953	6:40780850-40780850	T	intron_variant	MODIFIER	KCNIP4	ENSBTAG00000047743	Transcript	ENSBTAT00000129769	protein_coding	-	1/7	-	-	-	-	-	-	-	-	C	C/T	-	-1	-	VGNC	-	-	-	-	-	A1	-	-	-	-	-	-	Body_weight+Animal_QTLdb+67518,Body_weight+Animal_QTLdb+67519	-	-	-	-	-
rs109147043	6:52499833-52499833	C	intergenic_variant	MODIFIER	-	-	-	-	-	-	-	-	-	-	-	-	-	-	-	T	T/C	-	-	-	-	-	-	-	-	-	-	-	-	-	-	-	-	-	-	-	-	-	-
rs110354925	6:57353195-57353195	G	intron_variant	MODIFIER	TBC1D1	ENSBTAG00000013699	Transcript	ENSBTAT00000018206	protein_coding	-	12/19	-	-	-	-	-	-	-	-	A	A/G	-	1	-	VGNC	-	-	-	-	-	P4	-	-	-	-	-	-	-	-	-	-	-	-
rs110354925	6:57353195-57353195	G	intron_variant	MODIFIER	TBC1D1	ENSBTAG00000013699	Transcript	ENSBTAT00000068505	protein_coding	-	11/18	-	-	-	-	-	-	-	-	A	A/G	-	1	-	VGNC	-	-	-	-	-	-	-	-	-	-	-	-	-	-	-	-	-	-
rs110354925	6:57353195-57353195	G	intron_variant	MODIFIER	TBC1D1	ENSBTAG00000013699	Transcript	ENSBTAT00000076798	protein_coding	-	12/19	-	-	-	-	-	-	-	-	A	A/G	-	1	-	VGNC	-	-	-	-	-	-	-	-	-	-	-	-	-	-	-	-	-	-
rs110354925	6:57353195-57353195	G	intron_variant	MODIFIER	TBC1D1	ENSBTAG00000013699	Transcript	ENSBTAT00000076984	protein_coding	-	11/18	-	-	-	-	-	-	-	-	A	A/G	-	1	-	VGNC	-	-	-	-	-	-	-	-	-	-	-	-	-	-	-	-	-	-
rs110354925	6:57353195-57353195	G	intron_variant	MODIFIER	TBC1D1	ENSBTAG00000013699	Transcript	ENSBTAT00000083632	protein_coding	-	14/21	-	-	-	-	-	-	-	-	A	A/G	-	1	-	VGNC	-	-	-	-	-	A2	-	-	-	-	-	-	-	-	-	-	-	-
rs3423252931	7:101956846-101956846	A	intron_variant	MODIFIER	PAM	ENSBTAG00000012387	Transcript	ENSBTAT00000016445	protein_coding	-	4/23	-	-	-	-	-	-	-	-	G	G/A	-	1	-	VGNC	-	-	-	-	-	A1	-	-	-	-	-	-	-	-	-	-	-	-
rs3423252931	7:101956846-101956846	A	intron_variant	MODIFIER	PAM	ENSBTAG00000012387	Transcript	ENSBTAT00000016466	protein_coding	-	4/23	-	-	-	-	-	-	-	-	G	G/A	-	1	-	VGNC	-	-	-	-	-	A1	-	-	-	-	-	-	-	-	-	-	-	-
rs3423252931	7:101956846-101956846	A	intron_variant	MODIFIER	PAM	ENSBTAG00000012387	Transcript	ENSBTAT00000068971	protein_coding	-	4/23	-	-	-	-	-	-	-	-	G	G/A	-	1	-	VGNC	-	-	-	-	-	-	-	-	-	-	-	-	-	-	-	-	-	-
rs3423252931	7:101956846-101956846	A	intron_variant	MODIFIER	PAM	ENSBTAG00000012387	Transcript	ENSBTAT00000071809	protein_coding	-	4/22	-	-	-	-	-	-	-	-	G	G/A	-	1	-	VGNC	-	-	-	-	-	A1	-	-	-	-	-	-	-	-	-	-	-	-
rs3423252931	7:101956846-101956846	A	intron_variant	MODIFIER	PAM	ENSBTAG00000012387	Transcript	ENSBTAT00000080607	protein_coding	-	4/22	-	-	-	-	-	-	-	-	G	G/A	-	1	-	VGNC	-	-	-	-	-	A1	-	-	-	-	-	-	-	-	-	-	-	-
rs3423252931	7:101956846-101956846	A	intron_variant	MODIFIER	PAM	ENSBTAG00000012387	Transcript	ENSBTAT00000081395	protein_coding	-	4/24	-	-	-	-	-	-	-	-	G	G/A	-	1	-	VGNC	-	-	-	-	-	P4	-	-	-	-	-	-	-	-	-	-	-	-
rs3423252931	7:101956846-101956846	A	intron_variant	MODIFIER	PAM	ENSBTAG00000012387	Transcript	ENSBTAT00000090078	protein_coding	-	3/6	-	-	-	-	-	-	-	-	G	G/A	-	1	-	VGNC	-	-	-	-	-	-	-	-	-	-	-	-	-	-	-	-	-	-
rs136701038	7:102430585-102430585	A	upstream_gene_variant	MODIFIER	-	ENSBTAG00000064643	Transcript	ENSBTAT00000094582	lncRNA	-	-	-	-	-	-	-	-	-	-	G	G/A	9212	1	-	-	-	-	-	-	-	-	-	-	-	-	-	-	-	-	-	-	-	-
rs136701038	7:102430585-102430585	A	upstream_gene_variant	MODIFIER	-	ENSBTAG00000064643	Transcript	ENSBTAT00000107496	lncRNA	-	-	-	-	-	-	-	-	-	-	G	G/A	9243	1	-	-	-	-	-	-	-	-	-	-	-	-	-	-	-	-	-	-	-	-
rs110532998	8:3560707-3560707	C	intergenic_variant	MODIFIER	-	-	-	-	-	-	-	-	-	-	-	-	-	-	-	T	T/C	-	-	-	-	-	-	-	-	-	-	-	-	-	-	-	-	-	-	-	-	-	-
rs43713253	8:9281650-9281650	A	intergenic_variant	MODIFIER	-	-	-	-	-	-	-	-	-	-	-	-	-	-	-	G	G/A	-	-	-	-	-	-	-	-	-	-	-	-	-	-	-	-	-	-	-	-	-	-
rs109701320	8:14639815-14639815	A	intergenic_variant	MODIFIER	-	-	-	-	-	-	-	-	-	-	-	-	-	-	-	C	C/A	-	-	-	-	-	-	-	-	-	-	-	-	-	-	-	-	-	-	-	-	-	-
rs109277159	8:16181915-16181915	A	intron_variant	MODIFIER	LINGO2	ENSBTAG00000064575	Transcript	ENSBTAT00000098761	protein_coding	-	2/2	-	-	-	-	-	-	-	-	G	G/A	-	1	-	HGNC	HGNC:21207	-	-	-	-	P1	-	-	-	-	-	-	-	-	-	-	-	-
rs109277159	8:16181915-16181915	A	intron_variant	MODIFIER	LINGO2	ENSBTAG00000064575	Transcript	ENSBTAT00000111325	protein_coding	-	4/4	-	-	-	-	-	-	-	-	G	G/A	-	1	-	HGNC	HGNC:21207	-	-	-	-	P1	-	-	-	-	-	-	-	-	-	-	-	-
rs109277159	8:16181915-16181915	A	intron_variant	MODIFIER	LINGO2	ENSBTAG00000064575	Transcript	ENSBTAT00000119125	protein_coding	-	2/3	-	-	-	-	-	-	-	-	G	G/A	-	1	-	HGNC	HGNC:21207	-	-	-	-	P1	-	-	-	-	-	-	-	-	-	-	-	-
rs42284584	8:47039478-47039478	T	intron_variant	MODIFIER	TRPM3	ENSBTAG00000007778	Transcript	ENSBTAT00000061517	protein_coding	-	1/24	-	-	-	-	-	-	-	-	C	C/T	-	-1	-	VGNC	-	-	-	-	-	-	-	-	-	-	-	-	-	-	-	-	-	-
rs42284584	8:47039478-47039478	T	intron_variant	MODIFIER	TRPM3	ENSBTAG00000007778	Transcript	ENSBTAT00000094834	protein_coding	-	1/27	-	-	-	-	-	-	-	-	C	C/T	-	-1	-	VGNC	-	-	-	-	-	-	-	-	-	-	-	-	-	-	-	-	-	-
rs42284584	8:47039478-47039478	T	intron_variant	MODIFIER	TRPM3	ENSBTAG00000007778	Transcript	ENSBTAT00000095042	protein_coding	-	1/24	-	-	-	-	-	-	-	-	C	C/T	-	-1	-	VGNC	-	-	-	-	-	P1	-	-	-	-	-	-	-	-	-	-	-	-
rs3423279476	8:105273558-105273558	C	intergenic_variant	MODIFIER	-	-	-	-	-	-	-	-	-	-	-	-	-	-	-	T	T/C	-	-	-	-	-	-	-	-	-	-	-	-	-	-	-	-	-	-	-	-	-	-
rs110416891	9:11158693-11158693	A	intron_variant	MODIFIER	RIMS1	ENSBTAG00000020238	Transcript	ENSBTAT00000061208	protein_coding	-	1/33	-	-	-	-	-	-	-	-	G	G/A	-	1	-	VGNC	-	-	-	-	-	A2	-	-	-	-	-	-	-	-	-	-	-	-
rs110416891	9:11158693-11158693	A	intron_variant	MODIFIER	RIMS1	ENSBTAG00000020238	Transcript	ENSBTAT00000066372	protein_coding	-	1/29	-	-	-	-	-	-	-	-	G	G/A	-	1	-	VGNC	-	-	-	-	-	A2	-	-	-	-	-	-	-	-	-	-	-	-
rs110416891	9:11158693-11158693	A	intron_variant	MODIFIER	RIMS1	ENSBTAG00000020238	Transcript	ENSBTAT00000068382	protein_coding	-	1/26	-	-	-	-	-	-	-	-	G	G/A	-	1	-	VGNC	-	-	-	-	-	A2	-	-	-	-	-	-	-	-	-	-	-	-
rs110416891	9:11158693-11158693	A	intron_variant	MODIFIER	RIMS1	ENSBTAG00000020238	Transcript	ENSBTAT00000081547	protein_coding	-	1/27	-	-	-	-	-	-	-	-	G	G/A	-	1	-	VGNC	-	-	-	-	-	-	-	-	-	-	-	-	-	-	-	-	-	-
rs110416891	9:11158693-11158693	A	intron_variant	MODIFIER	RIMS1	ENSBTAG00000020238	Transcript	ENSBTAT00000085134	protein_coding	-	1/27	-	-	-	-	-	-	-	-	G	G/A	-	1	-	VGNC	-	-	-	-	-	A2	-	-	-	-	-	-	-	-	-	-	-	-
rs110416891	9:11158693-11158693	A	intron_variant	MODIFIER	RIMS1	ENSBTAG00000020238	Transcript	ENSBTAT00000085580	protein_coding	-	1/28	-	-	-	-	-	-	-	-	G	G/A	-	1	-	VGNC	-	-	-	-	-	P2	-	-	-	-	-	-	-	-	-	-	-	-
rs110416891	9:11158693-11158693	A	intron_variant	MODIFIER	RIMS1	ENSBTAG00000020238	Transcript	ENSBTAT00000085889	protein_coding	-	1/23	-	-	-	-	-	-	-	-	G	G/A	-	1	-	VGNC	-	-	-	-	-	A2	-	-	-	-	-	-	-	-	-	-	-	-
rs110416891	9:11158693-11158693	A	intron_variant	MODIFIER	RIMS1	ENSBTAG00000020238	Transcript	ENSBTAT00000087174	protein_coding	-	1/27	-	-	-	-	-	-	-	-	G	G/A	-	1	-	VGNC	-	-	-	-	-	A2	-	-	-	-	-	-	-	-	-	-	-	-
rs42491470	9:13634073-13634073	A	intergenic_variant	MODIFIER	-	-	-	-	-	-	-	-	-	-	-	-	-	-	-	G	G/A	-	-	-	-	-	-	-	-	-	-	-	-	-	-	-	-	-	-	-	-	-	-
rs43100186	9:20685975-20685975	A	intergenic_variant	MODIFIER	-	-	-	-	-	-	-	-	-	-	-	-	-	-	-	G	G/A	-	-	-	-	-	-	-	-	-	-	-	-	-	-	-	-	-	-	-	-	-	-
rs42250917	9:20753589-20753589	A	intergenic_variant	MODIFIER	-	-	-	-	-	-	-	-	-	-	-	-	-	-	-	C	C/A	-	-	-	-	-	-	-	-	-	-	-	-	-	-	-	-	-	-	-	-	-	-
rs41570419	9:20808486-20808486	T	intergenic_variant	MODIFIER	-	-	-	-	-	-	-	-	-	-	-	-	-	-	-	C	C/T	-	-	-	-	-	-	-	-	-	-	-	-	-	-	-	-	-	-	-	-	-	-
rs137774454	9:39892919-39892919	G	intron_variant	MODIFIER	METTL24	ENSBTAG00000033365	Transcript	ENSBTAT00000047451	protein_coding	-	2/4	-	-	-	-	-	-	-	-	A	A/G	-	1	-	VGNC	-	-	-	-	-	P1	-	-	-	-	-	-	-	-	-	-	-	-

## Sheet: SNP_consequence_unique
#Uploaded_variation	Consequence
rs110933273	intergenic_variant
rs43713002	intergenic_variant
rs41657683	downstream_gene_variant
rs41657683	intron_variant,non_coding_transcript_variant
rs110324045	intron_variant
rs110438172	intergenic_variant
rs3423111627	intergenic_variant
rs3423111611	intergenic_variant
rs41570239	intergenic_variant
rs43767288	intergenic_variant
rs133231177	intron_variant
rs29019349	downstream_gene_variant
rs43242536	intron_variant
rs3423093953	intergenic_variant
rs43749018	intergenic_variant
rs135592668	intron_variant
rs135592668	upstream_gene_variant
rs135999525	intron_variant
rs133698224	intron_variant
rs133410098	downstream_gene_variant
rs109117962	intron_variant
rs109117962	upstream_gene_variant
rs137700356	upstream_gene_variant
rs137700356	intron_variant
rs43283023	intron_variant
rs41658634	intron_variant
rs3423093513	intron_variant
rs43741350	intron_variant
rs137053723	intron_variant
rs134744181	intergenic_variant
rs41581784	upstream_gene_variant
rs29012667	intron_variant
rs109186505	upstream_gene_variant
rs109907807	intron_variant
rs43691605	intergenic_variant
rs136890099	intron_variant
rs41618427	downstream_gene_variant
rs41582571	intron_variant
rs109260058	intron_variant
rs109260058	downstream_gene_variant
rs109626146	intergenic_variant
rs110620960	intron_variant
rs29023180	intron_variant
rs111010098	intron_variant
rs41575449	intron_variant
rs109348898	intergenic_variant
rs110548459	intron_variant
rs133263801	intron_variant
rs133263801	downstream_gene_variant
rs109193608	intergenic_variant
rs110515076	intergenic_variant
rs41627563	upstream_gene_variant
rs109983109	intergenic_variant
rs132987419	intergenic_variant
rs110173824	intron_variant
rs41688462	downstream_gene_variant
rs41688462	intron_variant
rs3423368111	downstream_gene_variant
rs3423368111	intron_variant
rs41585373	intron_variant
rs133314893	intergenic_variant
rs41700634	intron_variant
rs29025815	missense_variant
rs137591751	downstream_gene_variant
rs137591751	upstream_gene_variant
rs41627470	intron_variant
rs110324238	downstream_gene_variant
rs110324238	upstream_gene_variant
rs109720559	upstream_gene_variant
rs42441151	intron_variant,non_coding_transcript_variant
rs42730765	intergenic_variant
rs41629750	upstream_gene_variant
rs41602527	splice_region_variant,intron_variant
rs3423092932	intron_variant
rs137698269	intergenic_variant
rs109567472	downstream_gene_variant
rs133876934	intergenic_variant
rs136556795	intergenic_variant
rs134323507	intergenic_variant
rs41762920	intron_variant,non_coding_transcript_variant
rs41762920	upstream_gene_variant
rs41566637	intergenic_variant
rs29014612	intron_variant
rs108954365	intron_variant
rs133821646	intergenic_variant
rs110123517	intron_variant
rs3423415998	intergenic_variant
rs135730562	intergenic_variant
rs109981365	intron_variant
rs110463504	intron_variant
rs132682865	upstream_gene_variant
rs132682865	intron_variant
rs41859838	downstream_gene_variant
rs41859838	intron_variant
rs29011610	downstream_gene_variant
rs29011610	intron_variant
rs41636732	intron_variant
rs134116687	downstream_gene_variant
rs41582489	intron_variant
rs109045973	downstream_gene_variant
rs109045973	synonymous_variant
rs109045973	intron_variant
rs3423437717	intron_variant
rs3423437717	upstream_gene_variant
rs110508237	intron_variant
rs136398464	upstream_gene_variant
rs136398464	downstream_gene_variant
rs136398464	regulatory_region_variant
rs41900308	intron_variant
rs42924027	upstream_gene_variant
rs42924027	downstream_gene_variant
rs110036994	synonymous_variant
rs110036994	intron_variant
rs109194627	intergenic_variant
rs109373475	intron_variant
rs109373475	upstream_gene_variant
rs136967970	intergenic_variant
rs109579864	intron_variant
rs41665397	intergenic_variant
rs136498445	intergenic_variant
rs110686148	downstream_gene_variant
rs110887612	upstream_gene_variant
rs110887612	3_prime_UTR_variant
rs110887612	downstream_gene_variant
rs42673204	downstream_gene_variant
rs42673204	upstream_gene_variant
rs42673204	intron_variant
rs109623709	intergenic_variant
rs109858762	intron_variant
rs42520485	intron_variant
rs42794065	intron_variant
rs110627799	upstream_gene_variant
rs110433832	intron_variant
rs110513671	intergenic_variant
rs41581570	intron_variant
rs42262483	intron_variant
rs42262483	upstream_gene_variant
rs42263251	upstream_gene_variant
rs42263251	intron_variant,non_coding_transcript_variant
rs41667474	downstream_gene_variant
rs41598451	intron_variant
rs109809439	intergenic_variant
rs42501206	intergenic_variant
rs43757203	intergenic_variant
rs134731665	intergenic_variant
rs109056407	intergenic_variant
rs110499399	intergenic_variant
rs137474595	regulatory_region_variant
rs137474595	intergenic_variant
rs136413433	intron_variant
rs110438897	intron_variant
rs109275311	intron_variant
rs42554556	intron_variant
rs134134329	intergenic_variant
rs41565671	intron_variant
rs41565671	upstream_gene_variant
rs42231914	intron_variant
rs29027914	intron_variant
rs110744293	intron_variant
rs110860468	upstream_gene_variant
rs29026684	intron_variant
rs29026684	upstream_gene_variant
rs41583931	intergenic_variant
rs41257081	3_prime_UTR_variant
rs109014975	intron_variant
rs110489495	intron_variant,non_coding_transcript_variant
rs110072536	intergenic_variant
rs110519737	intergenic_variant
rs133955943	intron_variant
rs133082164	intergenic_variant
rs110940666	intergenic_variant
rs110236363	intron_variant
rs110411186	intron_variant
rs136280135	intron_variant
rs42156900	intron_variant
rs41991317	intron_variant
rs42159980	intron_variant
rs133546012	intron_variant
rs135984630	intergenic_variant
rs29022132	intergenic_variant
rs110392437	intron_variant
rs135359671	intron_variant
rs109868969	intron_variant
rs109400388	intergenic_variant
rs136226092	intergenic_variant
rs42170441	intron_variant
rs110252499	intron_variant
rs42517435	intron_variant
rs42165802	intron_variant
rs3423094226	intergenic_variant
rs42356858	intron_variant
rs42356858	downstream_gene_variant
rs41572920	synonymous_variant
rs43382298	intergenic_variant
rs109231323	downstream_gene_variant
rs109231323	intron_variant
rs109231323	upstream_gene_variant
rs109944456	intron_variant
rs109944456	upstream_gene_variant
rs109195477	upstream_gene_variant
rs109195477	intron_variant
rs109195477	regulatory_region_variant
rs109833545	intron_variant
rs109408961	upstream_gene_variant
rs109966461	intron_variant
rs109892864	intron_variant
rs109147973	intergenic_variant
rs379201999	synonymous_variant
rs3423094263	3_prime_UTR_variant
rs3423094263	upstream_gene_variant
rs41595953	intron_variant
rs109147043	intergenic_variant
rs110354925	intron_variant
rs3423252931	intron_variant
rs136701038	upstream_gene_variant
rs110532998	intergenic_variant
rs43713253	intergenic_variant
rs109701320	intergenic_variant
rs109277159	intron_variant
rs42284584	intron_variant
rs3423279476	intergenic_variant
rs110416891	intron_variant
rs42491470	intergenic_variant
rs43100186	intergenic_variant
rs42250917	intergenic_variant
rs41570419	intergenic_variant
rs137774454	intron_variant

## Sheet: distribution_consequence
	Distribution of 'Consequence'
		Consequence	Count of Consequence
		intron_variant	95
		intergenic_variant	62
		upstream_gene_variant	30
		downstream_gene_variant	23
		intron_variant,non_coding_transcript_variant	5
		synonymous_variant	4
		3_prime_UTR_variant	3
		regulatory_region_variant	3
		missense_variant	1
		splice_region_variant,intron_variant	1
		Grand Total	227

## Sheet: percentage_consequence
	% distribution of 'Consequence'
		Consequence	Count of Consequence
		intron_variant	0.418502
		intergenic_variant	0.273128
		upstream_gene_variant	0.132159
		downstream_gene_variant	0.101322
		intron_variant,non_coding_transcript_variant	0.0220264
		synonymous_variant	0.0176211
		3_prime_UTR_variant	0.0132159
		regulatory_region_variant	0.0132159
		missense_variant	0.00440529
		splice_region_variant,intron_variant	0.00440529
		Grand Total	1
