# Supplementary material for: Genome-wide association analyses in dairy heifers highlight genes overlapping with mouse and human fertility and human health traits
Source: Research Square preprint supplement (doi:10.21203/rs.3.rs-6463477/v1), 2025-05-05
Supplement: Supplementary file 8 [file b5e869d3cdab7d2361892cca.xlsx]

## Sheet: Sheet1
Additional file 1. Information on heifers that were included in the affected group for the health analysis.
Heifer Local Index	DHIID	Left Herd Date	Reason Left	Breed	DART codes for reason left	Notes on DART
6129	840003214457131	2020-07-21	2	HO	Died respiratory	na
6141	840003214457143	2020-08-24	4	HO	Died other	na
6159	840003221144422	2020-10-13	3	HO	Died disease	Pneumonia, Acidosis
6174	840003221144437	2021-01-23	3	HO	Died disease	na
6193	840003221144456	2021-02-24	7	HO	Sold other	Chronic Pneumonia, Severe lung damage
6208	840003221144471	2021-03-16	23	HO	Died respiratory/Died disease	Chronic Pneumonia, Lung damage
6241	840003221144504	2021-08-10	4	HO	Died other	Salmonela
6245	840003221144508	2021-05-28	2	HO	Died respiratory	Pneumonia, Respiratory issues
6276	840003235924844	2021-12-07	2	HO	Died respiratory	Chronic Pneumonia
6299	840003235924867	2021-11-22	7	HO	Sold other	Chronic Pneumonia
6301	840003235924869	2022-03-20	7	HO	Sold other	Pneumonia
6434	840003251836864	2022-07-11	23	HO	Died respiratory,Died disease	Chronic Pneumonia
6516	840003251836946	2023-03-03	4	HO	Died other	Pneumonia, bloody scours
6520	840003251836950	2023-07-01	4	HO	Died other	Pneumonia
