# Supplementary material for: Genome-wide association analyses in dairy heifers highlight genes overlapping with mouse and human fertility and human health traits
Source: Research Square preprint supplement (doi:10.21203/rs.3.rs-6463477/v1), 2025-05-05
Supplement: Supplementary file 9 [file bf4c7154d4b0a007617c57e1.xlsx]

## Sheet: fertility_results_4_5_ai_fisher
Additional file 3. Results of analysis of sub-fertility.
Fisher allelic test										Fisher dominance test of the reference alleale									Fisher recessive test of the reference alleale
CHR	SNP	BP	A1	F_A	F_U	A2	P	OR		CHR	SNP	A1	A2	TEST	AFF	UNAFF	P		CHR	SNP	A1	A2	TEST	AFF	UNAFF	P
1	BovineHD0100000005	655346	1	0.5143	0.4241	2	0.1604	1.438		1	BovineHD0100000005	1	2	DOM	24/11	184/86	1		1	BovineHD0100000005	1	2	REC	12/23	45/225	0.0194
1	BovineHD0100000026	719789	2	0.5857	0.4852	1	0.1279	1.5		1	BovineHD0100000026	2	1	DOM	28/7	205/66	0.6765		1	BovineHD0100000026	2	1	REC	13/22	58/213	0.05353
1	BovineHD0100000035	761316	2	0.4861	0.3672	1	0.05375	1.63		1	BovineHD0100000035	2	1	DOM	25/11	161/110	0.28		1	BovineHD0100000035	2	1	REC	10/26	38/233	0.04773
1	Hapmap43437-BTA-101873	776231	1	0.5278	0.4225	2	0.1005	1.528		1	Hapmap43437-BTA-101873	1	2	DOM	26/10	185/86	0.7052		1	Hapmap43437-BTA-101873	1	2	REC	12/24	44/227	0.02
1	BovineHD0100000051	805126	1	0.5714	0.4667	2	0.1266	1.524		1	BovineHD0100000051	1	2	DOM	28/7	198/72	0.5386		1	BovineHD0100000051	1	2	REC	12/23	54/216	0.07814
1	BovineHD0100000057	824172	1	0.3143	0.3241	2	1	0.956		1	BovineHD0100000057	1	2	DOM	18/17	146/124	0.8575		1	BovineHD0100000057	1	2	REC	4/31	29/241	0.7795
1	BovineHD0100000066	842891	2	0.3636	0.4086	1	0.5091	0.8271		1	BovineHD0100000066	2	1	DOM	18/15	171/97	0.3414		1	BovineHD0100000066	2	1	REC	6/27	48/220	1
1	BovineHD0100000064	849544	1	0.3382	0.3685	2	0.6894	0.8758		1	BovineHD0100000064	1	2	DOM	18/16	161/109	0.4653		1	BovineHD0100000064	1	2	REC	5/29	38/232	1
1	BovineHD0100000067	858145	2	0.2714	0.2768	1	1	0.9736		1	BovineHD0100000067	2	1	DOM	16/19	130/141	0.8585		1	BovineHD0100000067	2	1	REC	3/32	20/251	0.7356
1	ARS-BFGL-NGS-16466	907810	2	0.06944	0.09225	1	0.6627	0.7343		1	ARS-BFGL-NGS-16466	2	1	DOM	5/31	49/222	0.6463		1	ARS-BFGL-NGS-16466	2	1	REC	0/36	1/270	1
1	BovineHD0100000077	914796	1	0.07576	0.1157	2	0.4106	0.6267		1	BovineHD0100000077	1	2	DOM	5/28	60/208	0.5006		1	BovineHD0100000077	1	2	REC	0/33	2/266	1
1	BovineHD0100000079	918822	1	0.07353	0.1222	2	0.3165	0.57		1	BovineHD0100000079	1	2	DOM	5/29	64/206	0.2835		1	BovineHD0100000079	1	2	REC	0/34	2/268	1
1	BovineHD0100000081	928563	2	0.07576	0.1157	1	0.4106	0.6267		1	BovineHD0100000081	2	1	DOM	5/28	60/208	0.5006		1	BovineHD0100000081	2	1	REC	0/33	2/266	1
1	BovineHD0100000082	930560	1	0.4286	0.4093	2	0.7968	1.083		1	BovineHD0100000082	1	2	DOM	24/11	168/102	0.5776		1	BovineHD0100000082	1	2	REC	6/29	53/217	0.8237
1	BovineHD0100000106	1001634	2	0.1618	0.137	1	0.5785	1.215		1	BovineHD0100000106	2	1	DOM	11/23	66/204	0.3042		1	BovineHD0100000106	2	1	REC	0/34	8/262	0.6043
1	BovineHD0100000110	1016283	2	0.1912	0.187	1	1	1.027		1	BovineHD0100000110	2	1	DOM	13/21	90/180	0.5691		1	BovineHD0100000110	2	1	REC	0/34	11/259	0.6188
1	Hapmap34944-BES1_Contig627_1906	1032564	2	0.3056	0.3137	1	1	0.9628		1	Hapmap34944-BES1_Contig627_1906	2	1	DOM	18/18	142/129	0.8598		1	Hapmap34944-BES1_Contig627_1906	2	1	REC	4/32	28/243	0.7775
1	BovineHD0100000136	1052361	2	0.3824	0.4389	1	0.4363	0.7914		1	BovineHD0100000136	2	1	DOM	23/11	186/84	0.8472		1	BovineHD0100000136	2	1	REC	3/31	51/219	0.2312
1	BovineHD0100000137	1055397	1	0.06061	0.0653	2	1	0.9235		1	BovineHD0100000137	1	2	DOM	4/29	34/234	1		1	BovineHD0100000137	1	2	REC	0/33	1/267	1
1	BovineHD0100000151	1091658	1	0.2206	0.2333	2	0.8799	0.9299		1	BovineHD0100000151	1	2	DOM	15/19	117/153	1		1	BovineHD0100000151	1	2	REC	0/34	9/261	0.6044
1	BovineHD0100000155	1098033	2	0.5147	0.45	1	0.3661	1.296		1	BovineHD0100000155	2	1	DOM	27/7	193/77	0.4175		1	BovineHD0100000155	2	1	REC	8/26	50/220	0.4896
1	BovineHD0100000161	1104577	2	0.2206	0.2333	1	0.8799	0.9299		1	BovineHD0100000161	2	1	DOM	15/19	117/153	1		1	BovineHD0100000161	2	1	REC	0/34	9/261	0.6044
1	ARS-BFGL-NGS-98142	1110393	2	0.3611	0.3801	1	0.797	0.9219		1	ARS-BFGL-NGS-98142	2	1	DOM	21/15	166/105	0.7208		1	ARS-BFGL-NGS-98142	2	1	REC	5/31	40/231	1
1	BovineHD0100000166	1112539	2	0.2206	0.2333	1	0.8799	0.9299		1	BovineHD0100000166	2	1	DOM	15/19	117/153	1		1	BovineHD0100000166	2	1	REC	0/34	9/261	0.6044
1	BovineHD0100000170	1126372	1	0.3571	0.4037	2	0.5172	0.8206		1	BovineHD0100000170	1	2	DOM	22/13	179/91	0.707		1	BovineHD0100000170	1	2	REC	3/32	39/231	0.4418
1	Hapmap53946-rs29015852	1150763	2	0.1528	0.1734	1	0.7413	0.8594		1	Hapmap53946-rs29015852	2	1	DOM	11/25	85/186	1		1	Hapmap53946-rs29015852	2	1	REC	0/36	9/262	0.6054
1	BovineHD0100000183	1188534	2	0.1571	0.213	1	0.3466	0.689		1	BovineHD0100000183	2	1	DOM	11/24	101/169	0.578		1	BovineHD0100000183	2	1	REC	0/35	14/256	0.3827
1	BovineHD0100000200	1235550	2	0.4412	0.474	1	0.6992	0.8762		1	BovineHD0100000200	2	1	DOM	23/11	193/76	0.6878		1	BovineHD0100000200	2	1	REC	7/27	62/207	0.8315
1	BovineHD0100000221	1375784	2	0.1714	0.1667	1	0.8662	1.034		1	BovineHD0100000221	2	1	DOM	11/24	82/188	1		1	BovineHD0100000221	2	1	REC	1/34	8/262	1
1	BovineHD0100000231	1406817	2	0.1806	0.1722	1	0.8686	1.059		1	BovineHD0100000231	2	1	DOM	12/24	84/186	0.8488		1	BovineHD0100000231	2	1	REC	1/35	9/261	1
1	BovineHD0100000234	1416198	2	0.4265	0.3489	1	0.2276	1.388		1	BovineHD0100000234	2	1	DOM	22/12	157/111	0.58		1	BovineHD0100000234	2	1	REC	7/27	30/238	0.1587
1	BovineHD0100000242	1459085	1	0.3286	0.4033	2	0.2446	0.7239		1	BovineHD0100000242	1	2	DOM	19/16	178/91	0.1892		1	BovineHD0100000242	1	2	REC	4/31	39/230	0.7986
1	BovineHD0100000244	1469010	2	0.05556	0.1365	1	0.05863	0.372		1	BovineHD0100000244	2	1	DOM	4/32	72/199	0.06209		1	BovineHD0100000244	2	1	REC	0/36	2/269	1
1	BovineHD0100000252	1523007	1	0.4857	0.4742	2	0.8991	1.047		1	BovineHD0100000252	1	2	DOM	27/8	190/81	0.4359		1	BovineHD0100000252	1	2	REC	7/28	67/204	0.6761
1	BovineHD0100000257	1540641	2	0.2206	0.3093	1	0.1599	0.6321		1	BovineHD0100000257	2	1	DOM	14/20	140/130	0.2771		1	BovineHD0100000257	2	1	REC	1/33	27/243	0.3393
1	BovineHD0100000261	1556392	1	0.4444	0.3759	2	0.3021	1.328		1	BovineHD0100000261	1	2	DOM	26/10	166/104	0.2712		1	BovineHD0100000261	1	2	REC	6/30	37/233	0.6123
1	BovineHD0100000280	1587057	1	0.3971	0.4241	2	0.6978	0.8943		1	BovineHD0100000280	1	2	DOM	20/14	180/90	0.4431		1	BovineHD0100000280	1	2	REC	7/27	49/221	0.8141
1	ARS-BFGL-NGS-65067	1604940	1	0.3056	0.3579	2	0.4318	0.7893		1	ARS-BFGL-NGS-65067	1	2	DOM	20/16	160/111	0.721		1	ARS-BFGL-NGS-65067	1	2	REC	2/34	34/237	0.2806
1	BovineHD0100000293	1621844	1	0.4429	0.4111	2	0.6089	1.139		1	BovineHD0100000293	1	2	DOM	25/10	175/95	0.571		1	BovineHD0100000293	1	2	REC	6/29	47/223	1
1	BovineHD0100000296	1625016	2	0.3636	0.4176	1	0.4289	0.7969		1	BovineHD0100000296	2	1	DOM	19/14	182/85	0.2418		1	BovineHD0100000296	2	1	REC	5/28	41/226	1
1	BovineHD0100000297	1627573	1	0.2286	0.2407	2	0.8827	0.9345		1	BovineHD0100000297	1	2	DOM	15/20	113/157	1		1	BovineHD0100000297	1	2	REC	1/34	17/253	0.7049
1	ARS-BFGL-BAC-34682	1671886	2	0.04167	0.0572	1	0.7861	0.7167		1	ARS-BFGL-BAC-34682	2	1	DOM	3/33	31/240	0.7795		1	ARS-BFGL-BAC-34682	2	1	REC	0/36	0/271	1
1	BovineHD0100000319	1685880	2	0.2941	0.3815	1	0.1837	0.6756		1	BovineHD0100000319	2	1	DOM	17/17	165/105	0.2654		1	BovineHD0100000319	2	1	REC	3/31	41/229	0.4409
1	ARS-BFGL-NGS-98203	1730547	1	0.4583	0.4686	2	0.9005	0.9594		1	ARS-BFGL-NGS-98203	1	2	DOM	24/12	191/80	0.6992		1	ARS-BFGL-NGS-98203	1	2	REC	9/27	63/208	0.835
1	BovineHD0100000344	1761967	2	0.4706	0.4685	1	1	1.008		1	BovineHD0100000344	2	1	DOM	25/9	187/83	0.6951		1	BovineHD0100000344	2	1	REC	7/27	66/204	0.8313
1	BovineHD0100000350	1784777	2	0.3857	0.4114	1	0.7007	0.8982		1	BovineHD0100000350	2	1	DOM	21/14	169/102	0.8537		1	BovineHD0100000350	2	1	REC	6/29	54/217	0.8233
1	BovineHD0100000354	1802755	2	0.5	0.4778	1	0.7971	1.093		1	BovineHD0100000354	2	1	DOM	26/8	192/78	0.6864		1	BovineHD0100000354	2	1	REC	8/26	66/204	1
1	BovineHD0100000360	1821203	1	0.1471	0.1866	2	0.5066	0.7517		1	BovineHD0100000360	1	2	DOM	10/24	90/178	0.702		1	BovineHD0100000360	1	2	REC	0/34	10/258	0.61
1	ARS-BFGL-BAC-2376	1834781	2	0.4583	0.4502	1	0.9004	1.033		1	ARS-BFGL-BAC-2376	2	1	DOM	26/10	190/81	0.8488		1	ARS-BFGL-BAC-2376	2	1	REC	7/29	54/217	1
1	BovineHD0100000370	1852426	2	0.07353	0.1231	1	0.3168	0.5652		1	BovineHD0100000370	2	1	DOM	5/29	64/204	0.2826		1	BovineHD0100000370	2	1	REC	0/34	2/266	1
1	BovineHD0100000373	1863496	2	0.1286	0.1402	1	1	0.9047		1	BovineHD0100000373	2	1	DOM	9/26	70/201	1		1	BovineHD0100000373	2	1	REC	0/35	6/265	1
1	BovineHD0100000382	1917241	1	0.2794	0.3241	2	0.493	0.8087		1	BovineHD0100000382	1	2	DOM	16/18	144/126	0.5853		1	BovineHD0100000382	1	2	REC	3/31	31/239	0.7802
1	BovineHD0100000391	1968406	1	0.4559	0.3963	2	0.3605	1.276		1	BovineHD0100000391	1	2	DOM	23/11	176/94	0.85		1	BovineHD0100000391	1	2	REC	8/26	38/232	0.1997
1	ARS-BFGL-BAC-7196	1984725	2	0.05556	0.04428	1	0.5581	1.27		1	ARS-BFGL-BAC-7196	2	1	DOM	4/32	24/247	0.7562		1	ARS-BFGL-BAC-7196	2	1	REC	0/36	0/271	1
1	ARS-BFGL-BAC-12931	2008865	1	0.125	0.1125	2	0.6962	1.126		1	ARS-BFGL-BAC-12931	1	2	DOM	9/27	55/216	0.5155		1	ARS-BFGL-BAC-12931	1	2	REC	0/36	6/265	1
1	BovineHD0100000402	2010236	1	0.3676	0.2889	2	0.2052	1.431		1	BovineHD0100000402	1	2	DOM	20/14	138/132	0.4678		1	BovineHD0100000402	1	2	REC	5/29	18/252	0.1567
1	BovineHD0100000406	2024917	1	0.4286	0.3519	2	0.2341	1.382		1	BovineHD0100000406	1	2	DOM	22/13	157/113	0.7158		1	BovineHD0100000406	1	2	REC	8/27	33/237	0.1095
1	ARS-BFGL-BAC-14857	2058539	2	0.3472	0.2841	1	0.2719	1.34		1	ARS-BFGL-BAC-14857	2	1	DOM	20/16	138/133	0.7231		1	ARS-BFGL-BAC-14857	2	1	REC	5/31	16/255	0.08366
1	Hapmap53766-ss46526150	2082139	2	0.5278	0.428	1	0.1293	1.493		1	Hapmap53766-ss46526150	2	1	DOM	25/11	181/90	0.8513		1	Hapmap53766-ss46526150	2	1	REC	13/23	51/220	0.02683
1	BovineHD0100000426	2086121	2	0.1912	0.1852	1	0.8696	1.04		1	BovineHD0100000426	2	1	DOM	12/22	89/181	0.8473		1	BovineHD0100000426	2	1	REC	1/33	11/259	1
1	ARS-BFGL-NGS-115971	2107796	2	0.4722	0.441	1	0.6164	1.134		1	ARS-BFGL-NGS-115971	2	1	DOM	22/14	182/89	0.4596		1	ARS-BFGL-NGS-115971	2	1	REC	12/24	57/214	0.1344
1	BovineHD0100000434	2119684	1	0.1324	0.1759	2	0.4937	0.7145		1	BovineHD0100000434	1	2	DOM	8/26	87/183	0.3342		1	BovineHD0100000434	1	2	REC	1/33	8/262	1
1	BovineHD0100000436	2128341	2	0.08824	0.06134	1	0.4272	1.481		1	BovineHD0100000436	2	1	DOM	6/28	31/238	0.2772		1	BovineHD0100000436	2	1	REC	0/34	2/267	1
1	ARS-BFGL-NGS-62826	2158691	2	0.1111	0.06089	1	0.1276	1.928		1	ARS-BFGL-NGS-62826	2	1	DOM	8/28	31/240	0.104		1	ARS-BFGL-NGS-62826	2	1	REC	0/36	2/269	1
1	BovineHD0100000445	2172213	1	0.1324	0.2037	2	0.1951	0.5963		1	BovineHD0100000445	1	2	DOM	8/26	100/170	0.1326		1	BovineHD0100000445	1	2	REC	1/33	10/260	1
1	BovineHD0100000449	2192489	2	0.5143	0.476	1	0.6116	1.166		1	BovineHD0100000449	2	1	DOM	24/11	191/80	0.8451		1	BovineHD0100000449	2	1	REC	12/23	67/204	0.2241
1	BovineHD0100000455	2214296	2	0.2353	0.3537	1	0.05746	0.5622		1	BovineHD0100000455	2	1	DOM	14/20	158/112	0.06642		1	BovineHD0100000455	2	1	REC	2/32	33/237	0.396
1	BovineHD0100000459	2229077	2	0.4853	0.3741	1	0.08604	1.578		1	BovineHD0100000459	2	1	DOM	24/10	170/100	0.4516		1	BovineHD0100000459	2	1	REC	9/25	32/238	0.02984
1	BTA-39394-no-rs	2235492	1	0.2083	0.1771	2	0.5159	1.223		1	BTA-39394-no-rs	1	2	DOM	15/21	88/183	0.3474		1	BTA-39394-no-rs	1	2	REC	0/36	8/263	0.6027
1	BovineHD0100000488	2279667	1	0.4429	0.363	2	0.2367	1.395		1	BovineHD0100000488	1	2	DOM	26/9	160/110	0.09902		1	BovineHD0100000488	1	2	REC	5/30	36/234	0.7964
1	BovineHD0100000504	2299194	1	0.2	0.2907	2	0.1214	0.6099		1	BovineHD0100000504	1	2	DOM	13/22	134/136	0.2083		1	BovineHD0100000504	1	2	REC	1/34	23/247	0.3331
1	ARS-BFGL-NGS-105306	2305128	1	0.2222	0.2934	2	0.266	0.6882		1	ARS-BFGL-NGS-105306	1	2	DOM	15/21	135/136	0.3804		1	ARS-BFGL-NGS-105306	1	2	REC	1/35	24/247	0.3324
1	BovineHD0100000526	2374280	1	0.1471	0.1426	2	0.8559	1.037		1	BovineHD0100000526	1	2	DOM	10/24	71/199	0.6844		1	BovineHD0100000526	1	2	REC	0/34	6/264	1
1	BovineHD0100000531	2379674	2	0.1765	0.1759	1	1	1.004		1	BovineHD0100000531	2	1	DOM	12/22	86/184	0.6996		1	BovineHD0100000531	2	1	REC	0/34	9/261	0.6044
1	ARS-BFGL-NGS-39992	2391777	1	0.1806	0.1827	2	1	0.986		1	ARS-BFGL-NGS-39992	1	2	DOM	13/23	90/181	0.7115		1	ARS-BFGL-NGS-39992	1	2	REC	0/36	9/262	0.6054
1	ARS-BFGL-BAC-13059	2482685	1	0.02778	0.04797	2	0.7614	0.567		1	ARS-BFGL-BAC-13059	1	2	DOM	2/34	25/246	0.7532		1	ARS-BFGL-BAC-13059	1	2	REC	0/36	1/270	1
1	ARS-BFGL-NGS-11433	2574098	1	0.2917	0.214	2	0.174	1.512		1	ARS-BFGL-NGS-11433	1	2	DOM	18/18	105/166	0.209		1	ARS-BFGL-NGS-11433	1	2	REC	3/33	11/260	0.2179
1	ARS-BFGL-NGS-25183	2617150	1	0.3333	0.2583	2	0.2017	1.436		1	ARS-BFGL-NGS-25183	1	2	DOM	19/17	125/146	0.4812		1	ARS-BFGL-NGS-25183	1	2	REC	5/31	15/256	0.06966
1	ARS-BFGL-BAC-7317	2703664	1	0.2917	0.214	2	0.174	1.512		1	ARS-BFGL-BAC-7317	1	2	DOM	18/18	105/166	0.209		1	ARS-BFGL-BAC-7317	1	2	REC	3/33	11/260	0.2179
1	ARS-BFGL-NGS-29653	2769164	1	0.4306	0.3007	2	0.03079	1.758		1	ARS-BFGL-NGS-29653	1	2	DOM	22/14	138/133	0.2889		1	ARS-BFGL-NGS-29653	1	2	REC	9/27	25/246	0.009406
1	BTA-120704-no-rs	2848684	1	0.2361	0.1863	2	0.3393	1.35		1	BTA-120704-no-rs	1	2	DOM	16/20	92/179	0.2649		1	BTA-120704-no-rs	1	2	REC	1/35	9/262	1
1	BovineHD0100000671	2952000	2	0.02857	0.03148	1	1	0.9048		1	BovineHD0100000671	2	1	DOM	2/33	17/253	1		1	BovineHD0100000671	2	1	REC	0/35	0/270	1
1	BovineHD0100000681	2981856	1	0.2639	0.3407	2	0.2306	0.6936		1	BovineHD0100000681	1	2	DOM	16/20	150/120	0.2181		1	BovineHD0100000681	1	2	REC	3/33	34/236	0.5935
1	BovineHD0100000687	2996976	2	0.1324	0.1648	1	0.6007	0.773		1	BovineHD0100000687	2	1	DOM	9/25	83/187	0.6951		1	BovineHD0100000687	2	1	REC	0/34	6/264	1
1	ARS-BFGL-NGS-115671	3033433	2	0.3056	0.3708	1	0.2995	0.7465		1	ARS-BFGL-NGS-115671	2	1	DOM	18/18	163/108	0.2808		1	ARS-BFGL-NGS-115671	2	1	REC	4/32	38/233	0.7989
1	BovineHD0100000719	3058587	1	0.2917	0.2741	2	0.7794	1.091		1	BovineHD0100000719	1	2	DOM	18/18	126/144	0.7256		1	BovineHD0100000719	1	2	REC	3/33	22/248	1
1	BovineHD0100000722	3061615	1	0.2222	0.1852	2	0.4278	1.257		1	BovineHD0100000722	1	2	DOM	15/21	90/180	0.3523		1	BovineHD0100000722	1	2	REC	1/35	10/260	1
1	ARS-BFGL-NGS-21352	3135408	2	0.375	0.3764	1	1	0.9941		1	ARS-BFGL-NGS-21352	2	1	DOM	20/16	162/109	0.7186		1	ARS-BFGL-NGS-21352	2	1	REC	7/29	42/229	0.6271
1	BovineHD4100000021	3172295	2	0.1765	0.1741	1	1	1.017		1	BovineHD4100000021	2	1	DOM	11/23	86/184	1		1	BovineHD4100000021	2	1	REC	1/33	8/262	1
1	ARS-BFGL-NGS-103391	3182687	2	0.06944	0.1458	1	0.09857	0.4374		1	ARS-BFGL-NGS-103391	2	1	DOM	4/32	71/200	0.06149		1	ARS-BFGL-NGS-103391	2	1	REC	1/35	8/263	1
1	BovineHD0100000805	3192208	1	0.4706	0.4033	2	0.2979	1.315		1	BovineHD0100000805	1	2	DOM	23/11	176/93	0.8504		1	BovineHD0100000805	1	2	REC	9/25	41/228	0.1369
1	BovineHD0100000807	3195861	1	0.4706	0.4056	2	0.3604	1.303		1	BovineHD0100000807	1	2	DOM	23/11	177/93	0.8507		1	BovineHD0100000807	1	2	REC	9/25	42/228	0.1405
1	ARS-BFGL-NGS-22858	3245141	2	0.09722	0.1679	1	0.169	0.5337		1	ARS-BFGL-NGS-22858	2	1	DOM	7/29	85/186	0.1764		1	ARS-BFGL-NGS-22858	2	1	REC	0/36	6/265	1
1	BovineHD0100000837	3264758	1	0.1389	0.2127	2	0.1628	0.5971		1	BovineHD0100000837	1	2	DOM	10/26	103/165	0.2711		1	BovineHD0100000837	1	2	REC	0/36	11/257	0.3729
1	BovineHD4100000025	3279233	2	0.1944	0.1617	1	0.4997	1.251		1	BovineHD4100000025	2	1	DOM	13/23	75/194	0.3296		1	BovineHD4100000025	2	1	REC	1/35	12/257	1
1	BovineHD0100000857	3315582	1	0.2083	0.1554	2	0.3049	1.43		1	BovineHD0100000857	1	2	DOM	13/23	75/192	0.3319		1	BovineHD0100000857	1	2	REC	2/34	8/259	0.3375
1	BovineHD0100000861	3339918	2	0.3472	0.3265	1	0.7895	1.097		1	BovineHD0100000861	2	1	DOM	20/16	144/124	0.8607		1	BovineHD0100000861	2	1	REC	5/31	31/237	0.594
1	BovineHD0100000876	3387354	2	0.5294	0.4335	1	0.1539	1.47		1	BovineHD0100000876	2	1	DOM	25/9	179/84	0.5627		1	BovineHD0100000876	2	1	REC	11/23	49/214	0.07056
1	BovineHD0100000878	3389765	2	0.5278	0.4366	1	0.1652	1.442		1	BovineHD0100000878	2	1	DOM	26/10	184/84	0.8479		1	BovineHD0100000878	2	1	REC	12/24	50/218	0.04829
1	BovineHD0100000895	3433143	1	0.5	0.4345	2	0.3134	1.302		1	BovineHD0100000895	1	2	DOM	26/10	185/82	0.8476		1	BovineHD0100000895	1	2	REC	10/26	47/220	0.1711
1	ARS-BFGL-NGS-58892	3434539	1	0.375	0.3358	2	0.5106	1.187		1	ARS-BFGL-NGS-58892	1	2	DOM	19/17	150/121	0.8589		1	ARS-BFGL-NGS-58892	1	2	REC	8/28	32/239	0.109
1	BovineHD0100000905	3462385	1	0.3056	0.3843	2	0.2431	0.7049		1	BovineHD0100000905	1	2	DOM	20/16	168/100	0.4659		1	BovineHD0100000905	1	2	REC	2/34	38/230	0.1936
1	ARS-BFGL-NGS-98287	3470316	2	0.2639	0.3063	1	0.4973	0.812		1	ARS-BFGL-NGS-98287	2	1	DOM	17/19	142/129	0.5976		1	ARS-BFGL-NGS-98287	2	1	REC	2/34	24/247	0.7515
1	BTB-00001612	3492221	2	0.06944	0.131	1	0.181	0.4951		1	BTB-00001612	2	1	DOM	5/31	70/201	0.1488		1	BTB-00001612	2	1	REC	0/36	1/270	1
1	BovineHD0100000930	3504642	1	0.3056	0.3848	2	0.2433	0.7036		1	BovineHD0100000930	1	2	DOM	20/16	165/104	0.5864		1	BovineHD0100000930	1	2	REC	2/34	42/227	0.1319
1	ARS-BFGL-NGS-15775	3560291	2	0.09722	0.06642	1	0.3264	1.514		1	ARS-BFGL-NGS-15775	2	1	DOM	7/29	34/237	0.2937		1	ARS-BFGL-NGS-15775	2	1	REC	0/36	2/269	1
1	BovineHD0100000956	3579296	1	0.1389	0.1343	2	0.8557	1.039		1	BovineHD0100000956	1	2	DOM	10/26	67/201	0.6878		1	BovineHD0100000956	1	2	REC	0/36	5/263	1
1	ARS-BFGL-NGS-59192	3599891	2	0.01389	0.02037	1	1	0.6773		1	ARS-BFGL-NGS-59192	2	1	DOM	1/35	11/259	1		1	ARS-BFGL-NGS-59192	2	1	REC	0/36	0/270	1
1	BovineHD0100000971	3611248	2	0.4167	0.5075	1	0.1678	0.6933		1	BovineHD0100000971	2	1	DOM	25/11	205/63	0.4078		1	BovineHD0100000971	2	1	REC	5/31	67/201	0.2087
1	BovineHD0100000973	3616076	2	0.2639	0.3606	1	0.1154	0.6357		1	BovineHD0100000973	2	1	DOM	18/18	167/102	0.2034		1	BovineHD0100000973	2	1	REC	1/35	27/242	0.2227
1	BTB-00001299	3653664	2	0.1528	0.238	1	0.134	0.5773		1	BTB-00001299	2	1	DOM	10/26	115/156	0.1059		1	BTB-00001299	2	1	REC	1/35	14/257	1
1	BovineHD0100046373	3667130	1	0.125	0.08868	2	0.3843	1.468		1	BovineHD0100046373	1	2	DOM	9/27	43/222	0.2373		1	BovineHD0100046373	1	2	REC	0/36	4/261	1
1	ARS-BFGL-NGS-37412	3687775	2	0.3889	0.4336	1	0.527	0.8313		1	ARS-BFGL-NGS-37412	2	1	DOM	25/11	185/86	1		1	ARS-BFGL-NGS-37412	2	1	REC	3/33	50/221	0.162
1	BovineHD0100001003	3701702	1	0.1944	0.1766	2	0.7432	1.126		1	BovineHD0100001003	1	2	DOM	14/22	84/185	0.3493		1	BovineHD0100001003	1	2	REC	0/36	11/258	0.3732
1	BovineHD4100000029	3704712	2	0.1944	0.2823	1	0.1231	0.6137		1	BovineHD4100000029	2	1	DOM	12/24	132/139	0.109		1	BovineHD4100000029	2	1	REC	2/34	21/250	1
1	BovineHD0100001009	3717415	2	0.625	0.4832	1	0.0323	1.782		1	BovineHD0100001009	2	1	DOM	33/3	198/70	0.02084		1	BovineHD0100001009	2	1	REC	12/24	61/207	0.2108
1	ARS-BFGL-NGS-16784	3721639	1	0.1111	0.07749	2	0.356	1.488		1	ARS-BFGL-NGS-16784	1	2	DOM	8/28	40/231	0.2316		1	ARS-BFGL-NGS-16784	1	2	REC	0/36	2/269	1
1	BTB-00001074	3826765	2	0.5	0.4815	1	0.8026	1.077		1	BTB-00001074	2	1	DOM	25/11	193/78	0.846		1	BTB-00001074	2	1	REC	11/25	68/203	0.5428
1	BovineHD0100001041	3840517	2	0.1528	0.1835	1	0.6249	0.8023		1	BovineHD0100001041	2	1	DOM	10/26	91/176	0.5727		1	BovineHD0100001041	2	1	REC	1/35	7/260	1
1	BovineHD0100001043	3849812	1	0.08333	0.21	2	0.01054	0.3419		1	BovineHD0100001043	1	2	DOM	5/31	99/170	0.0079		1	BovineHD0100001043	1	2	REC	1/35	14/255	1
1	ARS-BFGL-NGS-43924	3859505	2	0.25	0.3247	1	0.226	0.6932		1	ARS-BFGL-NGS-43924	2	1	DOM	17/19	145/126	0.4842		1	ARS-BFGL-NGS-43924	2	1	REC	1/35	31/240	0.1477
1	BovineHD0100001045	3861516	1	0.2639	0.2566	2	0.8864	1.039		1	BovineHD0100001045	1	2	DOM	19/17	117/150	0.3729		1	BovineHD0100001045	1	2	REC	0/36	20/247	0.146
1	BovineHD0100001052	3888198	1	0.2639	0.3228	2	0.3467	0.7522		1	BovineHD0100001052	1	2	DOM	17/19	142/126	0.595		1	BovineHD0100001052	1	2	REC	2/34	31/237	0.3959
1	ARS-BFGL-NGS-30999	3908027	2	0.4583	0.4151	1	0.526	1.192		1	ARS-BFGL-NGS-30999	2	1	DOM	26/10	179/92	0.573		1	ARS-BFGL-NGS-30999	2	1	REC	7/29	46/225	0.6463
1	ARS-USMARC-Parent-DQ381153-rs29012842	3958867	2	0.375	0.3339	1	0.5089	1.197		1	ARS-USMARC-Parent-DQ381153-rs29012842	2	1	DOM	24/12	152/119	0.2827		1	ARS-USMARC-Parent-DQ381153-rs29012842	2	1	REC	3/33	29/242	1
1	BovineHD0100001083	3973178	2	0.1528	0.1098	1	0.3226	1.461		1	BovineHD0100001083	2	1	DOM	10/26	55/209	0.388		1	BovineHD0100001083	2	1	REC	1/35	3/261	0.402
1	BovineHD0100001088	3989772	2	0.08333	0.08022	1	0.8211	1.042		1	BovineHD0100001088	2	1	DOM	6/30	40/228	0.8046		1	BovineHD0100001088	2	1	REC	0/36	3/265	1
1	BovineHD0100001098	4027625	1	0.3472	0.4216	2	0.2526	0.7296		1	BovineHD0100001098	1	2	DOM	21/15	175/93	0.4596		1	BovineHD0100001098	1	2	REC	4/32	51/217	0.3558
1	ARS-BFGL-NGS-107481	4052172	2	0.3472	0.2907	1	0.3381	1.298		1	ARS-BFGL-NGS-107481	2	1	DOM	20/16	131/139	0.4801		1	ARS-BFGL-NGS-107481	2	1	REC	5/31	26/244	0.3863
1	BovineHD0100001109	4070299	2	0.1667	0.1381	1	0.476	1.249		1	BovineHD0100001109	2	1	DOM	11/25	68/200	0.5448		1	BovineHD0100001109	2	1	REC	1/35	6/262	0.59
1	BTA-31687-no-rs	4113357	2	0.3889	0.3247	1	0.2885	1.323		1	BTA-31687-no-rs	2	1	DOM	24/12	152/119	0.2827		1	BTA-31687-no-rs	2	1	REC	4/32	24/247	0.7562
1	BovineHD0100001143	4155630	1	0.4306	0.3937	2	0.6083	1.165		1	BovineHD0100001143	1	2	DOM	24/12	166/102	0.7144		1	BovineHD0100001143	1	2	REC	7/29	45/223	0.643
1	BTA-32603-no-rs	4168130	2	0.06944	0.06827	1	1	1.019		1	BTA-32603-no-rs	2	1	DOM	5/31	36/235	1		1	BTA-32603-no-rs	2	1	REC	0/36	1/270	1
1	BovineHD0100001154	4181558	2	0.02778	0.06716	1	0.2972	0.3968		1	BovineHD0100001154	2	1	DOM	2/34	36/232	0.2808		1	BovineHD0100001154	2	1	REC	0/36	0/268	1
1	BovineHD0100001164	4224302	1	0.2361	0.2973	2	0.3332	0.7304		1	BovineHD0100001164	1	2	DOM	15/21	130/134	0.4778		1	BovineHD0100001164	1	2	REC	2/34	27/237	0.5507
1	BovineHD0100001169	4238490	1	0.4853	0.4453	2	0.6048	1.175		1	BovineHD0100001169	1	2	DOM	24/10	186/79	1		1	BovineHD0100001169	1	2	REC	9/25	50/215	0.3582
1	ARS-BFGL-NGS-69957	4250046	1	0.4861	0.4317	2	0.4483	1.245		1	ARS-BFGL-NGS-69957	1	2	DOM	26/10	186/85	0.7065		1	ARS-BFGL-NGS-69957	1	2	REC	9/27	48/223	0.3596
1	BovineHD0100001174	4254712	2	0.3714	0.3472	1	0.6909	1.111		1	BovineHD0100001174	2	1	DOM	21/14	154/111	0.8577		1	BovineHD0100001174	2	1	REC	5/30	30/235	0.5785
1	BovineHD0100001177	4267089	2	0.2361	0.1863	1	0.3393	1.35		1	BovineHD0100001177	2	1	DOM	14/22	88/183	0.4554		1	BovineHD0100001177	2	1	REC	3/33	13/258	0.4142
1	ARS-BFGL-NGS-43005	4276065	1	0.2917	0.2528	2	0.4755	1.217		1	ARS-BFGL-NGS-43005	1	2	DOM	18/18	113/158	0.3732		1	ARS-BFGL-NGS-43005	1	2	REC	3/33	24/247	1
1	Hapmap59750-rs29024375	4309205	1	0.5694	0.4871	2	0.2105	1.393		1	Hapmap59750-rs29024375	1	2	DOM	30/6	198/73	0.2262		1	Hapmap59750-rs29024375	1	2	REC	11/25	66/205	0.418
1	BovineHD0100001215	4318690	1	0.04167	0.04682	2	1	0.8852		1	BovineHD0100001215	1	2	DOM	3/33	25/242	1		1	BovineHD0100001215	1	2	REC	0/36	0/267	1
1	BTB-00002335	4335252	1	0.02778	0.04428	2	0.7569	0.6167		1	BTB-00002335	1	2	DOM	2/34	24/247	0.7515		1	BTB-00002335	1	2	REC	0/36	0/271	1
1	BovineHD0100001246	4418006	2	0.06944	0.08209	1	1	0.8345		1	BovineHD0100001246	2	1	DOM	5/31	42/226	1		1	BovineHD0100001246	2	1	REC	0/36	2/266	1
1	ARS-BFGL-NGS-81011	4494007	2	0.2917	0.2638	1	0.6707	1.149		1	ARS-BFGL-NGS-81011	2	1	DOM	19/17	124/147	0.479		1	ARS-BFGL-NGS-81011	2	1	REC	2/34	19/252	1
1	BovineHD0100001276	4509506	1	0.4028	0.3937	2	0.8983	1.039		1	BovineHD0100001276	1	2	DOM	23/13	166/102	0.8571		1	BovineHD0100001276	1	2	REC	6/30	45/223	1
1	BTB-00003162	4547357	2	0.09722	0.08487	1	0.6589	1.161		1	BTB-00003162	2	1	DOM	7/29	44/227	0.6348		1	BTB-00003162	2	1	REC	0/36	2/269	1
1	BTB-00002966	4615149	2	0.3611	0.2934	1	0.2739	1.361		1	BTB-00002966	2	1	DOM	22/14	134/137	0.2164		1	BTB-00002966	2	1	REC	4/32	25/246	0.7602
1	BTA-34568-no-rs	4729973	2	0.3611	0.3007	1	0.3414	1.314		1	BTA-34568-no-rs	2	1	DOM	21/15	137/134	0.4783		1	BTA-34568-no-rs	2	1	REC	5/31	26/245	0.3849
1	Hapmap42913-BTA-33619	4752971	1	0.5139	0.4483	2	0.3152	1.301		1	Hapmap42913-BTA-33619	1	2	DOM	27/9	186/85	0.5642		1	Hapmap42913-BTA-33619	1	2	REC	10/26	57/214	0.3908
1	BovineHD0100001370	4781618	2	0.5294	0.4659	1	0.3669	1.29		1	BovineHD0100001370	2	1	DOM	26/8	185/79	0.5493		1	BovineHD0100001370	2	1	REC	10/24	61/203	0.3998
1	BTB-00002687	4804971	1	0.05556	0.05926	2	1	0.9338		1	BTB-00002687	1	2	DOM	4/32	32/238	1		1	BTB-00002687	1	2	REC	0/36	0/270	1
1	BovineHD0100001385	4856702	2	0.06944	0.05576	1	0.5913	1.264		1	BovineHD0100001385	2	1	DOM	5/31	28/241	0.5658		1	BovineHD0100001385	2	1	REC	0/36	2/267	1
1	BovineHD0100001392	4882775	2	0	0.03321	1	0.2518	0		1	BovineHD0100001392	2	1	DOM	0/36	18/253	0.1448		1	BovineHD0100001392	2	1	REC	0/36	0/271	1
1	BovineHD0100001394	4890114	2	0.08333	0.03731	1	0.1097	2.345		1	BovineHD0100001394	2	1	DOM	6/30	20/248	0.1024		1	BovineHD0100001394	2	1	REC	0/36	0/268	1
1	BTB-01747944	4982601	1	0.05556	0.03875	2	0.5204	1.459		1	BTB-01747944	1	2	DOM	4/32	21/250	0.5131		1	BTB-01747944	1	2	REC	0/36	0/271	1
1	BovineHD0100001409	4986559	2	0.4722	0.4291	1	0.5275	1.19		1	BovineHD0100001409	2	1	DOM	26/10	179/89	0.5744		1	BovineHD0100001409	2	1	REC	8/28	51/217	0.6553
1	BTB-01991572	4991120	2	0.04167	0.03333	1	0.727	1.261		1	BTB-01991572	2	1	DOM	3/33	18/252	0.7235		1	BTB-01991572	2	1	REC	0/36	0/270	1
1	BovineHD0100001411	4991864	1	0.4861	0.4244	2	0.3755	1.283		1	BovineHD0100001411	1	2	DOM	26/10	179/92	0.573		1	BovineHD0100001411	1	2	REC	9/27	51/220	0.3754
1	BTB-02105769	5012080	1	0.4861	0.4557	2	0.706	1.13		1	BTB-02105769	1	2	DOM	26/10	191/80	1		1	BTB-02105769	1	2	REC	9/27	56/215	0.5213
1	BovineHD0100001418	5037720	2	0.05556	0.05037	1	0.777	1.109		1	BovineHD0100001418	2	1	DOM	4/32	27/241	0.7728		1	BovineHD0100001418	2	1	REC	0/36	0/268	1
1	ARS-BFGL-NGS-65157	5044963	1	0.3056	0.2749	2	0.5781	1.161		1	ARS-BFGL-NGS-65157	1	2	DOM	18/18	127/144	0.7266		1	ARS-BFGL-NGS-65157	1	2	REC	4/32	22/249	0.5248
1	BovineHD0100001424	5058523	2	0.5417	0.4244	1	0.0762	1.603		1	BovineHD0100001424	2	1	DOM	28/8	182/89	0.253		1	BovineHD0100001424	2	1	REC	11/25	48/223	0.07397
1	BovineHD0100001438	5087212	2	0.4722	0.3899	1	0.2006	1.4		1	BovineHD0100001438	2	1	DOM	27/9	174/94	0.2647		1	BovineHD0100001438	2	1	REC	7/29	35/233	0.3049
1	BovineHD0100001441	5099108	1	0.3611	0.3078	2	0.4172	1.271		1	BovineHD0100001441	1	2	DOM	22/14	138/130	0.2925		1	BovineHD0100001441	1	2	REC	4/32	27/241	0.7728
1	BTB-01996267	5147933	1	0.05556	0.0941	2	0.3804	0.5663		1	BTB-01996267	1	2	DOM	4/32	49/222	0.3571		1	BTB-01996267	1	2	REC	0/36	2/269	1
1	Hapmap38555-BTA-101264	5338825	2	0.2361	0.1937	1	0.4316	1.286		1	Hapmap38555-BTA-101264	2	1	DOM	16/20	93/178	0.2671		1	Hapmap38555-BTA-101264	2	1	REC	1/35	12/259	1
1	BovineHD0100001507	5372683	1	0.4583	0.3643	2	0.1536	1.476		1	BovineHD0100001507	1	2	DOM	24/12	160/109	0.4708		1	BovineHD0100001507	1	2	REC	9/27	36/233	0.07892
1	BTB-01160486	5384710	1	0.2361	0.19	2	0.3457	1.317		1	BTB-01160486	1	2	DOM	16/20	91/180	0.1992		1	BTB-01160486	1	2	REC	1/35	12/259	1
1	Hapmap60540-rs29021339	5462172	2	0.2361	0.3007	1	0.2742	0.7187		1	Hapmap60540-rs29021339	2	1	DOM	15/21	137/134	0.3763		1	Hapmap60540-rs29021339	2	1	REC	2/34	26/245	0.5526
1	BovineHD0100001535	5475277	2	0.125	0.1685	1	0.3999	0.7048		1	BovineHD0100001535	2	1	DOM	8/28	82/185	0.3371		1	BovineHD0100001535	2	1	REC	1/35	8/259	1
1	BovineHD0100001536	5482005	1	0.5	0.4944	2	1	1.023		1	BovineHD0100001536	1	2	DOM	28/8	203/64	1		1	BovineHD0100001536	1	2	REC	8/28	61/206	1
1	Hapmap60652-rs29022048	5519231	2	0.1806	0.3413	1	0.00688	0.4252		1	Hapmap60652-rs29022048	2	1	DOM	11/25	155/116	0.003902		1	Hapmap60652-rs29022048	2	1	REC	2/34	30/241	0.3976
1	BTB-01160178	5562248	1	0.05556	0.1273	2	0.08259	0.4032		1	BTB-01160178	1	2	DOM	4/32	66/205	0.09085		1	BTB-01160178	1	2	REC	0/36	3/268	1
1	BovineHD0100001579	5569070	1	0.08333	0.161	2	0.1131	0.4738		1	BovineHD0100001579	1	2	DOM	6/30	79/185	0.1161		1	BovineHD0100001579	1	2	REC	0/36	6/258	1
1	BovineHD0100001591	5612484	2	0.4167	0.3116	1	0.08167	1.578		1	BovineHD0100001591	2	1	DOM	22/14	144/124	0.4772		1	BovineHD0100001591	2	1	REC	8/28	23/245	0.01846
1	Hapmap43435-BTA-101251	5615120	2	0.2222	0.214	1	0.879	1.049		1	Hapmap43435-BTA-101251	2	1	DOM	15/21	104/167	0.7186		1	Hapmap43435-BTA-101251	2	1	REC	1/35	12/259	1
1	BovineHD0100001596	5629126	1	0.3056	0.4049	2	0.1231	0.6468		1	BovineHD0100001596	1	2	DOM	18/18	170/98	0.144		1	BovineHD0100001596	1	2	REC	4/32	47/221	0.4761
1	ARS-BFGL-NGS-111125	5644654	2	0.08333	0.0738	1	0.8107	1.141		1	ARS-BFGL-NGS-111125	2	1	DOM	6/30	38/233	0.6185		1	ARS-BFGL-NGS-111125	2	1	REC	0/36	2/269	1
1	BovineHD0100001610	5657951	1	0.02778	0.03545	2	1	0.7774		1	BovineHD0100001610	1	2	DOM	2/34	19/249	1		1	BovineHD0100001610	1	2	REC	0/36	0/268	1
1	BTB-01160026	5668141	1	0.3194	0.3967	2	0.2467	0.7139		1	BTB-01160026	1	2	DOM	20/16	168/103	0.471		1	BTB-01160026	1	2	REC	3/33	47/224	0.2304
1	BTB-01159977	5692100	1	0.06944	0.03333	2	0.1745	2.164		1	BTB-01159977	1	2	DOM	5/31	18/252	0.1672		1	BTB-01159977	1	2	REC	0/36	0/270	1
1	BTB-01159966	5720949	2	0.04167	0.02952	1	0.4789	1.429		1	BTB-01159966	2	1	DOM	3/33	16/255	0.4759		1	BTB-01159966	2	1	REC	0/36	0/271	1
1	BovineHD0100001629	5730545	2	0.09722	0.09888	1	1	0.9814		1	BovineHD0100001629	2	1	DOM	7/29	48/220	0.8187		1	BovineHD0100001629	2	1	REC	0/36	5/263	1
1	BovineHD0100001633	5744744	1	0.25	0.3787	2	0.03666	0.5468		1	BovineHD0100001633	1	2	DOM	17/19	158/110	0.21		1	BovineHD0100001633	1	2	REC	1/35	45/223	0.02485
1	Hapmap44178-BTA-101248	5745330	2	0.02778	0.04613	1	0.7586	0.5909		1	Hapmap44178-BTA-101248	2	1	DOM	2/34	25/246	0.7532		1	Hapmap44178-BTA-101248	2	1	REC	0/36	0/271	1
1	BovineHD0100001637	5749728	2	0.5	0.4777	1	0.8019	1.093		1	BovineHD0100001637	2	1	DOM	29/7	201/68	0.5397		1	BovineHD0100001637	2	1	REC	7/29	56/213	1
1	ARS-BFGL-NGS-114983	5768796	2	0.4028	0.3708	1	0.6062	1.144		1	ARS-BFGL-NGS-114983	2	1	DOM	26/10	165/106	0.2055		1	ARS-BFGL-NGS-114983	2	1	REC	3/33	36/235	0.5943
1	BovineHD0100001660	5803981	1	0.4861	0.4496	2	0.6146	1.158		1	BovineHD0100001660	1	2	DOM	28/8	185/83	0.336		1	BovineHD0100001660	1	2	REC	7/29	56/212	1
1	BovineHD0100001664	5822399	2	0.2778	0.2108	1	0.2239	1.44		1	BovineHD0100001664	2	1	DOM	20/16	102/166	0.04832		1	BovineHD0100001664	2	1	REC	0/36	11/257	0.3729
1	BovineHD0100001667	5834595	1	0.3714	0.291	2	0.1685	1.439		1	BovineHD0100001667	1	2	DOM	22/13	135/133	0.2082		1	BovineHD0100001667	1	2	REC	4/31	21/247	0.5091
1	BovineHD0100001678	5871590	1	0.3	0.3647	2	0.3531	0.7467		1	BovineHD0100001678	1	2	DOM	18/17	151/115	0.5895		1	BovineHD0100001678	1	2	REC	3/32	43/223	0.3212
1	BovineHD0100001688	5901795	2	0.1944	0.1556	1	0.3942	1.31		1	BovineHD0100001688	2	1	DOM	14/22	78/192	0.2467		1	BovineHD0100001688	2	1	REC	0/36	6/264	1
1	BTB-01728863	5909634	1	0.2778	0.3284	2	0.4233	0.7865		1	BTB-01728863	1	2	DOM	18/18	145/126	0.7249		1	BTB-01728863	1	2	REC	2/34	33/238	0.3996
1	BTB-00003983	5945833	1	0.2639	0.1815	2	0.1099	1.617		1	BTB-00003983	1	2	DOM	18/18	88/182	0.06072		1	BTB-00003983	1	2	REC	1/35	10/260	1
1	BovineHD0100001699	5948205	1	0.5417	0.4777	2	0.318	1.292		1	BovineHD0100001699	1	2	DOM	30/6	191/78	0.1635		1	BovineHD0100001699	1	2	REC	9/27	66/203	1
1	BovineHD4100000041	5968632	1	0.3429	0.3246	2	0.787	1.085		1	BovineHD4100000041	1	2	DOM	22/13	147/121	0.4697		1	BovineHD4100000041	1	2	REC	2/33	27/241	0.5513
1	BovineHD0100001705	5979118	1	0.2857	0.416	2	0.03841	0.5614		1	BovineHD0100001705	1	2	DOM	17/18	178/90	0.05908		1	BovineHD0100001705	1	2	REC	3/32	45/223	0.323
1	ARS-BFGL-NGS-100349	5985024	2	0.25	0.1753	1	0.1442	1.568		1	ARS-BFGL-NGS-100349	2	1	DOM	18/18	84/187	0.03679		1	ARS-BFGL-NGS-100349	2	1	REC	0/36	11/260	0.3737
1	BovineHD0100001716	5991427	2	0.5139	0.4554	1	0.3795	1.264		1	BovineHD0100001716	2	1	DOM	32/4	192/77	0.02661		1	BovineHD0100001716	2	1	REC	5/31	53/216	0.5021
1	BTA-122021-no-rs	6038527	2	0.1111	0.1863	1	0.1396	0.5458		1	BTA-122021-no-rs	2	1	DOM	7/29	90/181	0.1261		1	BTA-122021-no-rs	2	1	REC	1/35	11/260	1
1	BTB-00003770	6062518	2	0.25	0.262	1	0.8872	0.939		1	BTB-00003770	2	1	DOM	16/20	121/150	1		1	BTB-00003770	2	1	REC	2/34	21/250	1
1	BTB-00003715	6092662	2	0.2361	0.2638	1	0.6703	0.8624		1	BTB-00003715	2	1	DOM	15/21	122/149	0.7254		1	BTB-00003715	2	1	REC	2/34	21/250	1
1	BovineHD0100001759	6133181	2	0.3472	0.3086	1	0.5015	1.192		1	BovineHD0100001759	2	1	DOM	20/16	141/128	0.8592		1	BovineHD0100001759	2	1	REC	5/31	25/244	0.3736
1	BovineHD0100001769	6154670	1	0.2222	0.2185	2	1	1.022		1	BovineHD0100001769	1	2	DOM	15/21	107/163	0.8571		1	BovineHD0100001769	1	2	REC	1/35	11/259	1
1	Hapmap38892-BTA-36614	6160986	2	0.1111	0.07011	1	0.2309	1.658		1	Hapmap38892-BTA-36614	2	1	DOM	8/28	38/233	0.2136		1	Hapmap38892-BTA-36614	2	1	REC	0/36	0/271	1
1	BTB-00003652	6184195	2	0.1806	0.1125	1	0.1205	1.737		1	BTB-00003652	2	1	DOM	12/24	59/212	0.141		1	BTB-00003652	2	1	REC	1/35	2/269	0.313
1	BTA-120711-no-rs	6205654	1	0.3889	0.2934	2	0.1033	1.533		1	BTA-120711-no-rs	1	2	DOM	23/13	141/130	0.2145		1	BTA-120711-no-rs	1	2	REC	5/31	18/253	0.1665
1	BovineHD0100001788	6213780	1	0.4714	0.444	2	0.7023	1.117		1	BovineHD0100001788	1	2	DOM	23/12	192/76	0.5526		1	BovineHD0100001788	1	2	REC	10/25	46/222	0.1086
1	BovineHD0100001805	6251669	2	0.1528	0.09294	1	0.1396	1.76		1	BovineHD0100001805	2	1	DOM	10/26	47/222	0.1696		1	BovineHD0100001805	2	1	REC	1/35	3/266	0.3965
1	BTA-35637-no-rs	6274384	2	0.5	0.4834	1	0.8031	1.069		1	BTA-35637-no-rs	2	1	DOM	24/12	201/70	0.3247		1	BTA-35637-no-rs	2	1	REC	12/24	61/210	0.1512
1	ARS-BFGL-NGS-115182	6313376	1	0.4028	0.3284	2	0.2328	1.379		1	ARS-BFGL-NGS-115182	1	2	DOM	22/14	145/126	0.477		1	ARS-BFGL-NGS-115182	1	2	REC	7/29	33/238	0.2875
1	BovineHD0100001854	6366473	1	0.4167	0.3266	2	0.1446	1.473		1	BovineHD0100001854	1	2	DOM	24/12	146/125	0.158		1	BovineHD0100001854	1	2	REC	6/30	31/240	0.4108
1	BTA-35598-no-rs	6375330	2	0.04167	0.02583	1	0.437	1.64		1	BTA-35598-no-rs	2	1	DOM	3/33	14/257	0.4329		1	BTA-35598-no-rs	2	1	REC	0/36	0/271	1
1	BovineHD0100001857	6384709	2	0.375	0.2926	1	0.1719	1.451		1	BovineHD0100001857	2	1	DOM	23/13	129/141	0.0776		1	BovineHD0100001857	2	1	REC	4/32	29/241	1
1	BovineHD0100001865	6403787	2	0.4143	0.317	1	0.1062	1.524		1	BovineHD0100001865	2	1	DOM	23/12	138/127	0.1506		1	BovineHD0100001865	2	1	REC	6/29	30/235	0.4026
1	Hapmap58931-rs29010773	6404933	2	0.08333	0.0738	1	0.8107	1.141		1	Hapmap58931-rs29010773	2	1	DOM	6/30	40/231	0.8035		1	Hapmap58931-rs29010773	2	1	REC	0/36	0/271	1
1	BovineHD0100001869	6415835	1	0.3472	0.2714	2	0.2082	1.428		1	BovineHD0100001869	1	2	DOM	22/14	122/147	0.07896		1	BovineHD0100001869	1	2	REC	3/33	24/245	1
1	BTA-15152-rs29026517	6440092	2	0.06944	0.04797	1	0.394	1.481		1	BTA-15152-rs29026517	2	1	DOM	5/31	26/245	0.3849		1	BTA-15152-rs29026517	2	1	REC	0/36	0/271	1
1	BovineHD0100001883	6449771	2	0.08824	0.07736	1	0.8098	1.154		1	BovineHD0100001883	2	1	DOM	6/28	41/224	0.802		1	BovineHD0100001883	2	1	REC	0/34	0/265	1
1	BovineHD0100001895	6482306	1	0.3194	0.2249	2	0.1029	1.618		1	BovineHD0100001895	1	2	DOM	21/15	106/163	0.04642		1	BovineHD0100001895	1	2	REC	2/34	15/254	1
1	BovineHD0100001899	6498668	1	0.4167	0.3234	2	0.1429	1.494		1	BovineHD0100001899	1	2	DOM	23/13	145/124	0.2882		1	BovineHD0100001899	1	2	REC	7/29	29/240	0.1639
1	BovineHD0100001914	6539650	2	0.09722	0.03903	1	0.03654	2.651		1	BovineHD0100001914	2	1	DOM	6/30	21/248	0.1096		1	BovineHD0100001914	2	1	REC	1/35	0/269	0.118
1	Hapmap36132-SCAFFOLD45728_8109	6568614	1	0.4167	0.363	2	0.4355	1.254		1	Hapmap36132-SCAFFOLD45728_8109	1	2	DOM	25/11	167/103	0.4641		1	Hapmap36132-SCAFFOLD45728_8109	1	2	REC	5/31	29/241	0.5727
1	ARS-BFGL-NGS-113844	6598700	1	0.1111	0.2122	2	0.04268	0.4641		1	ARS-BFGL-NGS-113844	1	2	DOM	7/29	101/170	0.04078		1	ARS-BFGL-NGS-113844	1	2	REC	1/35	14/257	1
1	BTB-01489336	6656130	2	0.08333	0.1255	1	0.4393	0.6337		1	BTB-01489336	2	1	DOM	5/31	64/207	0.2865		1	BTB-01489336	2	1	REC	1/35	4/267	0.4664
1	BovineHD0100001962	6659142	2	0.1667	0.1734	1	1	0.9532		1	BovineHD0100001962	2	1	DOM	10/26	84/187	0.8477		1	BovineHD0100001962	2	1	REC	2/34	10/261	0.6388
1	ARS-BFGL-NGS-115389	6683341	1	0.2778	0.2749	2	1	1.014		1	ARS-BFGL-NGS-115389	1	2	DOM	17/19	126/145	1		1	ARS-BFGL-NGS-115389	1	2	REC	3/33	23/248	1
1	BovineHD0100001976	6712326	2	0.1528	0.213	1	0.2788	0.6664		1	BovineHD0100001976	2	1	DOM	10/26	101/169	0.3561		1	BovineHD0100001976	2	1	REC	1/35	14/256	1
1	BovineHD0100001978	6722062	2	0.1286	0.08614	1	0.2669	1.565		1	BovineHD0100001978	2	1	DOM	8/27	45/222	0.3536		1	BovineHD0100001978	2	1	REC	1/34	1/266	0.2187
1	BTB-01489466	6740664	1	0.2917	0.3007	2	1	0.9574		1	BTB-01489466	1	2	DOM	18/18	133/138	1		1	BTB-01489466	1	2	REC	3/33	30/241	0.7798
1	BovineHD0100001991	6781489	1	0.4722	0.4777	2	1	0.9783		1	BovineHD0100001991	1	2	DOM	27/9	190/79	0.697		1	BovineHD0100001991	1	2	REC	7/29	67/202	0.5409
1	BovineHD0100001996	6796330	2	0.06944	0.09444	1	0.6634	0.7155		1	BovineHD0100001996	2	1	DOM	5/31	48/222	0.6474		1	BovineHD0100001996	2	1	REC	0/36	3/267	1
1	BovineHD0100002000	6812013	2	0.3235	0.3504	1	0.6876	0.8867		1	BovineHD0100002000	2	1	DOM	16/18	146/118	0.3683		1	BovineHD0100002000	2	1	REC	6/28	39/225	0.616
1	Hapmap56173-ss46526166	6813154	1	0.5556	0.4815	2	0.26	1.346		1	Hapmap56173-ss46526166	1	2	DOM	30/6	204/67	0.4042		1	Hapmap56173-ss46526166	1	2	REC	10/26	57/214	0.3908
1	BovineHD0100002001	6813575	2	0.2857	0.277	1	0.8876	1.044		1	BovineHD0100002001	2	1	DOM	16/19	126/143	1		1	BovineHD0100002001	2	1	REC	4/31	23/246	0.5314
1	Hapmap51901-BTA-42438	6844784	1	0.5556	0.4815	2	0.26	1.346		1	Hapmap51901-BTA-42438	1	2	DOM	30/6	204/67	0.4042		1	Hapmap51901-BTA-42438	1	2	REC	10/26	57/214	0.3908
1	BovineHD0100002023	6893254	1	0.125	0.1654	2	0.494	0.7207		1	BovineHD0100002023	1	2	DOM	9/27	80/189	0.6969		1	BovineHD0100002023	1	2	REC	0/36	9/260	0.6056
1	BTA-43315-no-rs	6910759	2	0.5417	0.4889	1	0.4521	1.235		1	BTA-43315-no-rs	2	1	DOM	30/6	205/66	0.4035		1	BTA-43315-no-rs	2	1	REC	9/27	60/211	0.6748
1	BovineHD0100002036	6925674	2	0.1714	0.2094	1	0.5307	0.781		1	BovineHD0100002036	2	1	DOM	12/23	100/165	0.8527		1	BovineHD0100002036	2	1	REC	0/35	11/254	0.3739
1	ARS-BFGL-NGS-109057	6963461	2	0.4167	0.4557	1	0.6144	0.8531		1	ARS-BFGL-NGS-109057	2	1	DOM	24/12	190/81	0.7011		1	ARS-BFGL-NGS-109057	2	1	REC	6/30	57/214	0.6633
1	BovineHD0100002068	7002644	1	0.1667	0.2148	2	0.4404	0.731		1	BovineHD0100002068	1	2	DOM	12/24	103/167	0.7145		1	BovineHD0100002068	1	2	REC	0/36	13/257	0.3768
1	ARS-BFGL-NGS-41525	7022169	2	0.5278	0.4926	1	0.6169	1.151		1	ARS-BFGL-NGS-41525	2	1	DOM	29/7	206/65	0.677		1	ARS-BFGL-NGS-41525	2	1	REC	9/27	61/210	0.8325
1	BovineHD0100002084	7036520	2	0.2917	0.3741	1	0.1934	0.689		1	BovineHD0100002084	2	1	DOM	19/17	160/110	0.476		1	BovineHD0100002084	2	1	REC	2/34	42/228	0.1321
1	BovineHD0100002101	7059775	2	0.05714	0.05682	1	1	1.006		1	BovineHD0100002101	2	1	DOM	4/31	30/234	1		1	BovineHD0100002101	2	1	REC	0/35	0/264	1
1	Hapmap34831-BES10_Contig712_1090	7071121	2	0.05556	0.1384	1	0.05901	0.3663		1	Hapmap34831-BES10_Contig712_1090	2	1	DOM	3/33	73/198	0.01331		1	Hapmap34831-BES10_Contig712_1090	2	1	REC	1/35	2/269	0.313
1	BovineHD0100002124	7144946	1	0.3472	0.2313	2	0.04042	1.767		1	BovineHD0100002124	1	2	DOM	23/13	107/161	0.007278		1	BovineHD0100002124	1	2	REC	2/34	17/251	1
1	BovineHD0100002127	7159731	2	0.5303	0.454	1	0.2946	1.358		1	BovineHD0100002127	2	1	DOM	27/6	189/72	0.2999		1	BovineHD0100002127	2	1	REC	8/25	48/213	0.4793
1	BTA-44295-no-rs	7164618	1	0.3194	0.2185	2	0.07266	1.679		1	BTA-44295-no-rs	1	2	DOM	21/15	104/166	0.02978		1	BTA-44295-no-rs	1	2	REC	2/34	14/256	1
1	BTA-44308-no-rs	7202401	2	0.1571	0.2193	1	0.2776	0.6636		1	BTA-44308-no-rs	2	1	DOM	10/25	108/161	0.2024		1	BTA-44308-no-rs	2	1	REC	1/34	10/259	1
1	BTA-45181-no-rs	7260253	2	0.4028	0.4483	1	0.5283	0.8298		1	BTA-45181-no-rs	2	1	DOM	23/13	187/84	0.5689		1	BTA-45181-no-rs	2	1	REC	6/30	56/215	0.6643
1	ARS-BFGL-NGS-11803	7280774	2	0.1389	0.2066	1	0.2094	0.6192		1	ARS-BFGL-NGS-11803	2	1	DOM	10/26	95/176	0.4572		1	ARS-BFGL-NGS-11803	2	1	REC	0/36	17/254	0.2369
1	BTA-45221-no-rs	7311182	2	0.4583	0.4779	1	0.8023	0.9246		1	BTA-45221-no-rs	2	1	DOM	24/12	200/71	0.4243		1	BTA-45221-no-rs	2	1	REC	9/27	59/212	0.671
1	BovineHD0100002179	7333147	2	0.2714	0.2659	1	0.8868	1.028		1	BovineHD0100002179	2	1	DOM	15/20	119/148	1		1	BovineHD0100002179	2	1	REC	4/31	23/244	0.5336
1	BovineHD0100002183	7354808	2	0.3	0.2243	1	0.1758	1.482		1	BovineHD0100002183	2	1	DOM	18/17	108/155	0.2765		1	BovineHD0100002183	2	1	REC	3/32	10/253	0.1863
1	BovineHD0100002202	7412933	2	0.5429	0.4487	1	0.1603	1.459		1	BovineHD0100002202	2	1	DOM	27/8	179/84	0.3329		1	BovineHD0100002202	2	1	REC	11/24	57/206	0.2024
1	BovineHD4100000049	7419499	2	0.2917	0.2509	1	0.4731	1.229		1	BovineHD4100000049	2	1	DOM	19/17	117/152	0.3723		1	BovineHD4100000049	2	1	REC	2/34	18/251	1
1	Hapmap39203-BTA-46163	7424552	2	0.05556	0.04428	1	0.5581	1.27		1	Hapmap39203-BTA-46163	2	1	DOM	4/32	24/247	0.7562		1	Hapmap39203-BTA-46163	2	1	REC	0/36	0/271	1
1	AX-18028228	7429447	2	0.3333	0.3222	1	0.8935	1.052		1	AX-18028228	2	1	DOM	20/16	146/124	1		1	AX-18028228	2	1	REC	4/32	28/242	0.7782
1	ARS-BFGL-NGS-96381	7449333	2	0.5	0.4944	1	1	1.023		1	ARS-BFGL-NGS-96381	2	1	DOM	25/10	199/68	0.6845		1	ARS-BFGL-NGS-96381	2	1	REC	10/25	65/202	0.6773
1	BTA-46228-no-rs	7484829	1	0.2222	0.2122	2	0.8784	1.061		1	BTA-46228-no-rs	1	2	DOM	12/24	99/172	0.8538		1	BTA-46228-no-rs	1	2	REC	4/32	16/255	0.271
1	BovineHD0100002252	7519177	1	0.3857	0.4849	2	0.1277	0.667		1	BovineHD0100002252	1	2	DOM	20/15	189/76	0.1161		1	BovineHD0100002252	1	2	REC	7/28	68/197	0.5391
1	BovineHD0100002277	7568080	1	0.4429	0.4065	2	0.6056	1.161		1	BovineHD0100002277	1	2	DOM	21/14	173/89	0.5709		1	BovineHD0100002277	1	2	REC	10/25	40/222	0.05631
1	BTA-47159-no-rs	7569903	1	0.08333	0.1402	2	0.2665	0.5574		1	BTA-47159-no-rs	1	2	DOM	5/31	74/197	0.1044		1	BTA-47159-no-rs	1	2	REC	1/35	2/269	0.313
1	BovineHD0100002282	7575218	2	0.4143	0.4305	1	0.8979	0.9359		1	BovineHD0100002282	2	1	DOM	22/13	177/89	0.7055		1	BovineHD0100002282	2	1	REC	7/28	52/214	1
1	BTA-16441-no-rs	7616380	2	0.3472	0.2862	1	0.3345	1.326		1	BTA-16441-no-rs	2	1	DOM	20/16	132/137	0.4835		1	BTA-16441-no-rs	2	1	REC	5/31	22/247	0.3421
1	BovineHD0100002347	7788418	1	0.4143	0.3859	2	0.696	1.125		1	BovineHD0100002347	1	2	DOM	24/11	171/92	0.8502		1	BovineHD0100002347	1	2	REC	5/30	32/231	0.7841
1	ARS-BFGL-NGS-38621	7808598	2	0.3472	0.3063	1	0.4993	1.205		1	ARS-BFGL-NGS-38621	2	1	DOM	20/16	146/125	0.8611		1	ARS-BFGL-NGS-38621	2	1	REC	5/31	20/251	0.1919
1	BovineHD0100002376	7890249	1	0.4861	0.4833	2	1	1.011		1	BovineHD0100002376	1	2	DOM	24/12	197/72	0.4293		1	BovineHD0100002376	1	2	REC	11/25	63/206	0.4071
1	Hapmap44081-BTA-48210	7893442	2	0.05556	0.03506	1	0.3324	1.619		1	Hapmap44081-BTA-48210	2	1	DOM	4/32	19/252	0.3273		1	Hapmap44081-BTA-48210	2	1	REC	0/36	0/271	1
1	BovineHD0100002384	7920464	2	0.4861	0.4908	1	1	0.9815		1	BovineHD0100002384	2	1	DOM	24/12	196/75	0.555		1	BovineHD0100002384	2	1	REC	11/25	70/201	0.5495
1	ARS-BFGL-NGS-114174	7939960	2	0.4861	0.4907	1	1	0.9818		1	ARS-BFGL-NGS-114174	2	1	DOM	24/12	195/74	0.5541		1	ARS-BFGL-NGS-114174	2	1	REC	11/25	69/200	0.5474
1	BovineHD0100002396	7964687	2	0.1667	0.1338	1	0.4661	1.294		1	BovineHD0100002396	2	1	DOM	12/24	69/200	0.3216		1	BovineHD0100002396	2	1	REC	0/36	3/266	1
1	BTA-48234-no-rs	7966238	2	0.125	0.1089	1	0.6892	1.169		1	BTA-48234-no-rs	2	1	DOM	9/27	57/214	0.6656		1	BTA-48234-no-rs	2	1	REC	0/36	2/269	1
1	BTA-29644-no-rs	8000850	1	0.4167	0.476	2	0.38	0.7863		1	BTA-29644-no-rs	1	2	DOM	25/11	192/79	0.8474		1	BTA-29644-no-rs	1	2	REC	5/31	66/205	0.2079
1	Hapmap48967-BTA-97940	8075890	1	0.4167	0.3801	2	0.6063	1.165		1	Hapmap48967-BTA-97940	1	2	DOM	26/10	167/104	0.2715		1	Hapmap48967-BTA-97940	1	2	REC	4/32	39/232	0.799
1	BovineHD0100002423	8100141	1	0.5714	0.464	2	0.09871	1.54		1	BovineHD0100002423	1	2	DOM	29/6	184/80	0.1162		1	BovineHD0100002423	1	2	REC	11/24	61/203	0.2953
1	BTB-01493780	8122464	1	0.06944	0.1402	2	0.1356	0.4576		1	BTB-01493780	1	2	DOM	4/32	72/199	0.06209		1	BTB-01493780	1	2	REC	1/35	4/267	0.4664
1	BovineHD0100002437	8161528	2	0.2424	0.2156	1	0.6361	1.164		1	BovineHD0100002437	2	1	DOM	13/20	98/164	0.8501		1	BovineHD0100002437	2	1	REC	3/30	15/247	0.4363
1	BovineHD0100002440	8182783	2	0.3571	0.2992	1	0.3356	1.301		1	BovineHD0100002440	2	1	DOM	18/17	125/139	0.7201		1	BovineHD0100002440	2	1	REC	7/28	33/231	0.2862
1	Hapmap48369-BTA-50306	8219111	1	0.3333	0.3321	2	1	1.006		1	Hapmap48369-BTA-50306	1	2	DOM	18/18	151/120	0.5937		1	Hapmap48369-BTA-50306	1	2	REC	6/30	29/242	0.272
1	BovineHD0100002449	8226256	2	0.3235	0.383	1	0.356	0.7704		1	BovineHD0100002449	2	1	DOM	17/17	167/98	0.1892		1	BovineHD0100002449	2	1	REC	5/29	36/229	0.7944
1	BovineHD0100002458	8274037	2	0.5147	0.481	1	0.6088	1.144		1	BovineHD0100002458	2	1	DOM	26/8	198/65	1		1	BovineHD0100002458	2	1	REC	9/25	55/208	0.5061
1	Hapmap41255-BTA-40460	8298027	2	0.4444	0.3838	1	0.3684	1.285		1	Hapmap41255-BTA-40460	2	1	DOM	25/11	168/103	0.4644		1	Hapmap41255-BTA-40460	2	1	REC	7/29	40/231	0.4623
1	BTA-114657-no-rs	8320562	1	0.1143	0.07593	2	0.2478	1.57		1	BTA-114657-no-rs	1	2	DOM	8/27	41/229	0.2306		1	BTA-114657-no-rs	1	2	REC	0/35	0/270	1
1	BovineHD0100002480	8329113	1	0.4265	0.3864	2	0.5977	1.181		1	BovineHD0100002480	1	2	DOM	23/11	165/99	0.7062		1	BovineHD0100002480	1	2	REC	6/28	39/225	0.616
1	ARS-BFGL-NGS-116504	8347260	2	0.4444	0.428	1	0.8012	1.069		1	ARS-BFGL-NGS-116504	2	1	DOM	25/11	185/86	1		1	ARS-BFGL-NGS-116504	2	1	REC	7/29	47/224	0.8156
1	BTA-114662-no-rs	8374638	2	0.1667	0.1978	1	0.6348	0.8113		1	BTA-114662-no-rs	2	1	DOM	10/26	98/170	0.3565		1	BTA-114662-no-rs	2	1	REC	2/34	8/260	0.336
1	ARS-BFGL-NGS-105113	8534534	2	0.375	0.5093	1	0.03357	0.5782		1	ARS-BFGL-NGS-105113	2	1	DOM	21/15	210/60	0.02139		1	ARS-BFGL-NGS-105113	2	1	REC	6/30	65/205	0.4035
1	BovineHD0100002528	8548471	1	0.3286	0.2547	2	0.1954	1.432		1	BovineHD0100002528	1	2	DOM	19/16	116/151	0.2783		1	BovineHD0100002528	1	2	REC	4/31	20/247	0.5007
1	BovineHD0100002539	8607680	1	0.2794	0.3845	2	0.1096	0.6208		1	BovineHD0100002539	1	2	DOM	17/17	168/96	0.1356		1	BovineHD0100002539	1	2	REC	2/32	35/229	0.2796
1	ARS-BFGL-NGS-44292	8645661	2	0.375	0.369	1	1	1.026		1	ARS-BFGL-NGS-44292	2	1	DOM	23/13	160/111	0.7181		1	ARS-BFGL-NGS-44292	2	1	REC	4/32	40/231	0.7999
1	BovineHD0100002563	8685545	2	0.2879	0.3938	1	0.1071	0.6222		1	BovineHD0100002563	2	1	DOM	17/16	166/93	0.1826		1	BovineHD0100002563	2	1	REC	2/31	38/221	0.2796
1	BovineHD0100002572	8717011	1	0.4306	0.417	2	0.8989	1.057		1	BovineHD0100002572	1	2	DOM	25/11	180/91	0.8511		1	BovineHD0100002572	1	2	REC	6/30	46/225	1
1	Hapmap42827-BTA-116887	8738949	2	0.4444	0.4704	1	0.7075	0.9008		1	Hapmap42827-BTA-116887	2	1	DOM	26/10	200/70	0.8407		1	Hapmap42827-BTA-116887	2	1	REC	6/30	54/216	0.8235
1	BovineHD0100002584	8752633	2	0.2778	0.2989	1	0.7844	0.9022		1	BovineHD0100002584	2	1	DOM	18/18	141/130	0.8604		1	BovineHD0100002584	2	1	REC	2/34	21/250	1
1	BTA-116886-no-rs	8760078	2	0.01389	0.05351	1	0.2388	0.2492		1	BTA-116886-no-rs	2	1	DOM	1/35	29/242	0.2268		1	BTA-116886-no-rs	2	1	REC	0/36	0/271	1
1	BovineHD0100002591	8781288	1	0.3088	0.3506	2	0.588	0.8277		1	BovineHD0100002591	1	2	DOM	19/15	153/108	0.8537		1	BovineHD0100002591	1	2	REC	2/32	30/231	0.5551
1	ARS-BFGL-NGS-109383	8808124	1	0.04167	0.02963	2	0.4803	1.424		1	ARS-BFGL-NGS-109383	1	2	DOM	3/33	16/254	0.4773		1	ARS-BFGL-NGS-109383	1	2	REC	0/36	0/270	1
1	BovineHD0100002599	8813992	1	0.3088	0.4125	2	0.1149	0.6362		1	BovineHD0100002599	1	2	DOM	19/15	175/88	0.2517		1	BovineHD0100002599	1	2	REC	2/32	42/221	0.1955
1	Hapmap54753-rs29013987	8831407	1	0.4583	0.4188	2	0.5284	1.174		1	Hapmap54753-rs29013987	1	2	DOM	24/12	186/85	0.8494		1	Hapmap54753-rs29013987	1	2	REC	9/27	41/230	0.1491
1	BovineHD0100002609	8850299	2	0.3429	0.4349	1	0.1583	0.6778		1	BovineHD0100002609	2	1	DOM	21/14	185/84	0.3373		1	BovineHD0100002609	2	1	REC	3/32	49/220	0.2308
1	BovineHD0100002622	8908159	2	0.2576	0.2197	1	0.5309	1.232		1	BovineHD0100002622	2	1	DOM	15/18	104/160	0.573		1	BovineHD0100002622	2	1	REC	2/31	12/252	0.6599
1	ARS-BFGL-NGS-119108	8937196	1	0.1667	0.1439	2	0.5961	1.19		1	ARS-BFGL-NGS-119108	1	2	DOM	10/26	73/198	1		1	ARS-BFGL-NGS-119108	1	2	REC	2/34	5/266	0.1927
1	BovineHD0100002644	8993587	1	0.2361	0.2741	2	0.5727	0.8187		1	BovineHD0100002644	1	2	DOM	14/22	132/138	0.2899		1	BovineHD0100002644	1	2	REC	3/33	16/254	0.4773
1	ARS-BFGL-BAC-27364	9069741	2	0.2222	0.1833	1	0.424	1.273		1	ARS-BFGL-BAC-27364	2	1	DOM	15/21	92/178	0.4569		1	ARS-BFGL-BAC-27364	2	1	REC	1/35	7/263	1
1	BTA-120428-no-rs	9151571	1	0.4722	0.4225	2	0.4484	1.223		1	BTA-120428-no-rs	1	2	DOM	26/10	178/93	0.5733		1	BTA-120428-no-rs	1	2	REC	8/28	51/220	0.6532
1	BovineHD0100002683	9178105	1	0.2647	0.3078	2	0.5754	0.8095		1	BovineHD0100002683	1	2	DOM	17/17	139/129	0.8574		1	BovineHD0100002683	1	2	REC	1/33	26/242	0.3351
1	Hapmap49483-BTA-120432	9259731	2	0.2222	0.1716	1	0.3238	1.379		1	Hapmap49483-BTA-120432	2	1	DOM	14/22	87/184	0.452		1	Hapmap49483-BTA-120432	2	1	REC	2/34	6/265	0.2386
1	BovineHD0100002710	9260615	1	0.3056	0.3315	2	0.6911	0.8874		1	BovineHD0100002710	1	2	DOM	20/16	150/120	1		1	BovineHD0100002710	1	2	REC	2/34	29/241	0.5545
1	BovineHD0100002717	9285546	2	0.2206	0.2091	1	0.8744	1.07		1	BovineHD0100002717	2	1	DOM	12/22	102/161	0.8516		1	BovineHD0100002717	2	1	REC	3/31	8/255	0.1192
1	BovineHD0100002727	9313530	2	0.01515	0.05534	1	0.2353	0.2626		1	BovineHD0100002727	2	1	DOM	1/32	29/233	0.2224		1	BovineHD0100002727	2	1	REC	0/33	0/262	1
1	BovineHD0100002735	9339352	2	0.197	0.2094	1	0.8738	0.9259		1	BovineHD0100002735	2	1	DOM	11/22	101/164	0.7042		1	BovineHD0100002735	2	1	REC	2/31	10/255	0.6294
1	BovineHD0100002758	9438066	2	0.2059	0.2936	1	0.1533	0.6239		1	BovineHD0100002758	2	1	DOM	14/20	137/127	0.2764		1	BovineHD0100002758	2	1	REC	0/34	18/246	0.2407
1	Hapmap59566-rs29024165	9467212	2	0.2361	0.1236	1	0.01612	2.191		1	Hapmap59566-rs29024165	2	1	DOM	15/21	65/206	0.04126		1	Hapmap59566-rs29024165	2	1	REC	2/34	2/269	0.069
1	BTA-120430-no-rs	9523532	2	0.5	0.4926	1	1	1.03		1	BTA-120430-no-rs	2	1	DOM	29/7	202/68	0.54		1	BTA-120430-no-rs	2	1	REC	7/29	64/206	0.6772
1	Hapmap58026-ss46526282	9592005	2	0.3056	0.3985	1	0.1565	0.6641		1	Hapmap58026-ss46526282	2	1	DOM	19/17	178/93	0.1414		1	Hapmap58026-ss46526282	2	1	REC	3/33	38/233	0.4423
1	ARS-BFGL-NGS-118398	9646618	2	0.3333	0.4207	1	0.1634	0.6886		1	ARS-BFGL-NGS-118398	2	1	DOM	20/16	183/88	0.1892		1	ARS-BFGL-NGS-118398	2	1	REC	4/32	45/226	0.4772
1	BovineHD0100002828	9666125	2	0.3636	0.4291	1	0.3553	0.7602		1	BovineHD0100002828	2	1	DOM	19/14	174/87	0.3327		1	BovineHD0100002828	2	1	REC	5/28	50/211	0.8126
1	BovineHD0100002836	9708099	2	0.3788	0.4275	1	0.5093	0.8166		1	BovineHD0100002836	2	1	DOM	19/14	174/88	0.3351		1	BovineHD0100002836	2	1	REC	6/27	50/212	1
1	ARS-BFGL-NGS-14644	9741307	1	0.1528	0.1402	2	0.7218	1.106		1	ARS-BFGL-NGS-14644	1	2	DOM	11/25	72/199	0.6898		1	ARS-BFGL-NGS-14644	1	2	REC	0/36	4/267	1
1	BovineHD0100002867	9830721	1	0.4848	0.4253	2	0.3597	1.272		1	BovineHD0100002867	1	2	DOM	23/10	176/85	0.8462		1	BovineHD0100002867	1	2	REC	9/24	46/215	0.2333
1	BovineHD0100002870	9843069	1	0.3182	0.2934	2	0.6698	1.124		1	BovineHD0100002870	1	2	DOM	17/16	131/128	1		1	BovineHD0100002870	1	2	REC	4/29	21/238	0.5035
1	BovineHD0100002895	9929401	2	0.3235	0.4106	1	0.1894	0.6864		1	BovineHD0100002895	2	1	DOM	18/16	176/87	0.1262		1	BovineHD0100002895	2	1	REC	4/30	40/223	0.7984
1	BovineHD0100002920	10015824	2	0.25	0.3722	1	0.04925	0.5622		1	BovineHD0100002920	2	1	DOM	16/20	168/102	0.04701		1	BovineHD0100002920	2	1	REC	2/34	33/237	0.4
1	BTA-38496-no-rs	10029104	1	0.5	0.4354	2	0.3145	1.297		1	BTA-38496-no-rs	1	2	DOM	28/8	188/83	0.3379		1	BTA-38496-no-rs	1	2	REC	8/28	48/223	0.4953
1	BovineHD0100002947	10061095	2	0.3529	0.3697	1	0.8938	0.9298		1	BovineHD0100002947	2	1	DOM	18/16	158/103	0.4583		1	BovineHD0100002947	2	1	REC	6/28	35/226	0.442
1	BovineHD0100002950	10083802	2	0.3529	0.3645	1	0.8941	0.951		1	BovineHD0100002950	2	1	DOM	18/16	155/107	0.5796		1	BovineHD0100002950	2	1	REC	6/28	36/226	0.5999
1	ARS-BFGL-NGS-113570	10225421	1	0.1944	0.1218	2	0.09382	1.741		1	ARS-BFGL-NGS-113570	1	2	DOM	13/23	64/207	0.15		1	ARS-BFGL-NGS-113570	1	2	REC	1/35	2/269	0.313
1	Hapmap54975-rs29019203	10261207	1	0.4583	0.4945	2	0.6165	0.8651		1	Hapmap54975-rs29019203	1	2	DOM	26/10	203/68	0.6889		1	Hapmap54975-rs29019203	1	2	REC	7/29	65/206	0.677
1	BovineHD0100003065	10325849	2	0.2647	0.233	1	0.5471	1.185		1	BovineHD0100003065	2	1	DOM	16/18	111/153	0.5858		1	BovineHD0100003065	2	1	REC	2/32	12/252	0.666
1	BovineHD0100003089	10376109	2	0.2941	0.2888	1	1	1.026		1	BovineHD0100003089	2	1	DOM	16/18	127/131	0.8567		1	BovineHD0100003089	2	1	REC	4/30	22/236	0.5219
1	Hapmap49138-BTA-37549	10391180	2	0.2222	0.1513	1	0.1253	1.603		1	Hapmap49138-BTA-37549	2	1	DOM	12/24	71/200	0.4243		1	Hapmap49138-BTA-37549	2	1	REC	4/32	11/260	0.08455
1	Hapmap38504-BTA-51402	10421991	1	0.2083	0.1593	2	0.3104	1.389		1	Hapmap38504-BTA-51402	1	2	DOM	12/24	80/190	0.6996		1	Hapmap38504-BTA-51402	1	2	REC	3/33	6/264	0.07643
1	BovineHD0100003129	10442426	2	0.02941	0.05263	1	0.5618	0.5455		1	BovineHD0100003129	2	1	DOM	2/32	28/238	0.5508		1	BovineHD0100003129	2	1	REC	0/34	0/266	1
1	UA-IFASA-5979	10475147	2	0.4583	0.3875	1	0.2513	1.338		1	UA-IFASA-5979	2	1	DOM	25/11	168/103	0.4644		1	UA-IFASA-5979	2	1	REC	8/28	42/229	0.3357
1	BovineHD0100003147	10482008	2	0.04412	0.07171	1	0.6079	0.5975		1	BovineHD0100003147	2	1	DOM	3/31	35/223	0.5919		1	BovineHD0100003147	2	1	REC	0/34	2/256	1
1	BovineHD0100003154	10501157	2	0.4706	0.4129	1	0.3646	1.264		1	BovineHD0100003154	2	1	DOM	28/6	182/82	0.1151		1	BovineHD0100003154	2	1	REC	4/30	36/228	1
1	AX-18039968	10512329	2	0.3056	0.3222	1	0.8931	0.9255		1	AX-18039968	2	1	DOM	19/17	152/118	0.7232		1	AX-18039968	2	1	REC	3/33	22/248	1
1	BovineHD0100003161	10518325	1	0.4306	0.4074	2	0.7042	1.1		1	BovineHD0100003161	1	2	DOM	25/11	184/86	1		1	BovineHD0100003161	1	2	REC	6/30	36/234	0.606
1	ARS-BFGL-NGS-548	10523098	2	0.3056	0.3056	1	1	1		1	ARS-BFGL-NGS-548	2	1	DOM	21/15	146/124	0.7226		1	ARS-BFGL-NGS-548	2	1	REC	1/35	19/251	0.4871
1	ARS-BFGL-NGS-43310	10563465	1	0.4583	0.4742	2	0.9001	0.9383		1	ARS-BFGL-NGS-43310	1	2	DOM	26/10	202/69	0.8393		1	ARS-BFGL-NGS-43310	1	2	REC	7/29	55/216	1
1	ARS-BFGL-NGS-1296	10565732	1	0.1667	0.2103	2	0.4405	0.7509		1	ARS-BFGL-NGS-1296	1	2	DOM	12/24	103/168	0.7146		1	ARS-BFGL-NGS-1296	1	2	REC	0/36	11/260	0.3737
1	Hapmap38887-BTA-22281	10605227	2	0.1667	0.2185	1	0.3598	0.7153		1	Hapmap38887-BTA-22281	2	1	DOM	12/24	108/162	0.4735		1	Hapmap38887-BTA-22281	2	1	REC	0/36	10/260	0.6133
1	BovineHD0100003225	10647953	1	0.1471	0.1525	2	1	0.9581		1	BovineHD0100003225	1	2	DOM	9/25	74/185	1		1	BovineHD0100003225	1	2	REC	1/33	5/254	0.5262
1	Hapmap57724-rs29022825	10679165	1	0.4444	0.4391	2	1	1.022		1	Hapmap57724-rs29022825	1	2	DOM	24/12	188/83	0.848		1	Hapmap57724-rs29022825	1	2	REC	8/28	50/221	0.65
1	Hapmap44892-BTA-50337	10724714	1	0.3472	0.3451	2	1	1.009		1	Hapmap44892-BTA-50337	1	2	DOM	22/14	154/114	0.7223		1	Hapmap44892-BTA-50337	1	2	REC	3/33	31/237	0.7795
1	BTA-50328-no-rs	10747495	1	0.4028	0.4796	2	0.2581	0.7317		1	BTA-50328-no-rs	1	2	DOM	25/11	202/68	0.5434		1	BTA-50328-no-rs	1	2	REC	4/32	57/213	0.1878
1	ARS-BFGL-NGS-108684	10771543	1	0.3194	0.3271	2	1	0.9654		1	ARS-BFGL-NGS-108684	1	2	DOM	20/16	153/116	1		1	ARS-BFGL-NGS-108684	1	2	REC	3/33	23/246	1
1	Hapmap51183-BTA-19351	10793076	2	0.375	0.4096	1	0.6112	0.8649		1	Hapmap51183-BTA-19351	2	1	DOM	21/15	179/92	0.3589		1	Hapmap51183-BTA-19351	2	1	REC	6/30	43/228	0.8133
1	BovineHD0100003282	10809430	2	0.1818	0.2729	1	0.1375	0.5921		1	BovineHD0100003282	2	1	DOM	12/21	127/135	0.2012		1	BovineHD0100003282	2	1	REC	0/33	16/246	0.2316
1	BovineHD0100003285	10826689	1	0.3485	0.3555	2	1	0.9697		1	BovineHD0100003285	1	2	DOM	20/13	159/104	1		1	BovineHD0100003285	1	2	REC	3/30	28/235	1
1	BovineHD0100003303	10887298	2	0.3824	0.4457	1	0.3646	0.7699		1	BovineHD0100003303	2	1	DOM	23/11	192/75	0.6871		1	BovineHD0100003303	2	1	REC	3/31	46/221	0.3222
1	BovineHD0100003313	10954721	1	0.303	0.3523	2	0.4937	0.7994		1	BovineHD0100003313	1	2	DOM	18/15	155/109	0.7095		1	BovineHD0100003313	1	2	REC	2/31	31/233	0.5546
1	ARS-BFGL-NGS-113751	11092797	1	0.1944	0.1989	2	1	0.9723		1	ARS-BFGL-NGS-113751	1	2	DOM	12/24	100/169	0.7157		1	ARS-BFGL-NGS-113751	1	2	REC	2/34	7/262	0.2878
1	BovineHD0100003385	11208321	2	0.07143	0.1078	1	0.4115	0.6366		1	BovineHD0100003385	2	1	DOM	5/30	52/217	0.6456		1	BovineHD0100003385	2	1	REC	0/35	6/263	1
1	BovineHD0100003390	11227266	1	0.02857	0.0539	2	0.5632	0.5162		1	BovineHD0100003390	1	2	DOM	2/33	29/240	0.5524		1	BovineHD0100003390	1	2	REC	0/35	0/269	1
1	BTA-122626-no-rs	11267601	1	0	0.01845	2	0.6157	0		1	BTA-122626-no-rs	1	2	DOM	0/36	10/261	0.613		1	BTA-122626-no-rs	1	2	REC	0/36	0/271	1
1	BovineHD0100003407	11296054	2	0.2206	0.2171	1	1	1.021		1	BovineHD0100003407	2	1	DOM	12/22	101/157	0.7118		1	BovineHD0100003407	2	1	REC	3/31	11/247	0.2146
1	BovineHD0100003409	11304599	2	0.1471	0.1858	1	0.5061	0.7554		1	BovineHD0100003409	2	1	DOM	8/26	91/170	0.2469		1	BovineHD0100003409	2	1	REC	2/32	6/255	0.2322
1	BovineHD0200037433	11315803	2	0.1765	0.1402	1	0.4623	1.315		1	BovineHD0200037433	2	1	DOM	12/22	68/196	0.303		1	BovineHD0200037433	2	1	REC	0/34	6/258	1
1	Hapmap60823-rs29019235	11341018	2	0	0.01845	1	0.6139	0		1	Hapmap60823-rs29019235	2	1	DOM	0/35	10/261	0.6111		1	Hapmap60823-rs29019235	2	1	REC	0/35	0/271	1
1	ARS-BFGL-NGS-36767	11400789	2	0.4583	0.3893	1	0.3052	1.327		1	ARS-BFGL-NGS-36767	2	1	DOM	26/10	176/95	0.4572		1	ARS-BFGL-NGS-36767	2	1	REC	7/29	35/236	0.3015
1	BovineHD0100003437	11462748	1	0.4861	0.4797	2	1	1.026		1	BovineHD0100003437	1	2	DOM	26/10	205/66	0.6823		1	BovineHD0100003437	1	2	REC	9/27	55/216	0.5155
1	Hapmap40304-BTA-17131	11472285	1	0.2917	0.2768	2	0.7809	1.076		1	Hapmap40304-BTA-17131	1	2	DOM	19/17	135/136	0.8595		1	Hapmap40304-BTA-17131	1	2	REC	2/34	15/256	1
1	BovineHD0100003453	11509566	2	0.4143	0.47	1	0.4447	0.7975		1	BovineHD0100003453	2	1	DOM	24/11	197/70	0.5443		1	BovineHD0100003453	2	1	REC	5/30	54/213	0.5012
1	BovineHD0100003459	11541372	1	0.4571	0.4736	2	0.8987	0.936		1	BovineHD0100003459	1	2	DOM	23/12	192/73	0.4273		1	BovineHD0100003459	1	2	REC	9/26	59/206	0.6688
1	Hapmap38737-BTA-22640	11647870	2	0.02857	0.03889	1	1	0.7269		1	Hapmap38737-BTA-22640	2	1	DOM	2/33	21/249	1		1	Hapmap38737-BTA-22640	2	1	REC	0/35	0/270	1
1	BovineHD0100003487	11671029	1	0.2571	0.2143	2	0.4425	1.269		1	BovineHD0100003487	1	2	DOM	16/19	105/161	0.5827		1	BovineHD0100003487	1	2	REC	2/33	9/257	0.3728
1	BovineHD0100003501	11735568	2	0.1286	0.1528	1	0.7224	0.8179		1	BovineHD0100003501	2	1	DOM	9/26	76/189	0.8427		1	BovineHD0100003501	2	1	REC	0/35	5/260	1
1	Hapmap54322-rs29009637	11776956	2	0.2286	0.1993	1	0.5317	1.191		1	Hapmap54322-rs29009637	2	1	DOM	14/21	95/176	0.5776		1	Hapmap54322-rs29009637	2	1	REC	2/33	13/258	0.6845
1	BovineHD0100003524	11818525	2	0.4167	0.4814	1	0.3172	0.7694		1	BovineHD0100003524	2	1	DOM	24/12	198/71	0.4256		1	BovineHD0100003524	2	1	REC	6/30	61/208	0.5226
1	Hapmap43814-BTA-22629	11840829	2	0.125	0.2066	1	0.1156	0.5485		1	Hapmap43814-BTA-22629	2	1	DOM	8/28	101/170	0.09507		1	Hapmap43814-BTA-22629	2	1	REC	1/35	11/260	1
1	BovineHD0100003573	11956821	1	0.2857	0.4023	2	0.06793	0.5944		1	BovineHD0100003573	1	2	DOM	18/17	178/88	0.08901		1	BovineHD0100003573	1	2	REC	2/33	36/230	0.2791
1	Hapmap55642-rs29027263	11993667	2	0.4857	0.3856	1	0.1198	1.505		1	Hapmap55642-rs29027263	2	1	DOM	27/8	176/95	0.1847		1	Hapmap55642-rs29027263	2	1	REC	7/28	33/238	0.1901
1	BovineHD0100003588	12049311	2	0.4429	0.5	1	0.3771	0.7949		1	BovineHD0100003588	2	1	DOM	26/9	205/63	0.833		1	BovineHD0100003588	2	1	REC	5/30	63/205	0.2833
1	BovineHD0100003597	12069543	1	0.3429	0.3849	2	0.5159	0.8338		1	BovineHD0100003597	1	2	DOM	19/16	166/99	0.3591		1	BovineHD0100003597	1	2	REC	5/30	38/227	1
1	BovineHD0100003627	12200034	2	0.4861	0.4815	1	1	1.018		1	BovineHD0100003627	2	1	DOM	23/13	200/71	0.2337		1	BovineHD0100003627	2	1	REC	12/24	61/210	0.1512
1	BovineHD0100003636	12239641	1	0.08824	0.07722	2	0.8095	1.156		1	BovineHD0100003636	1	2	DOM	6/28	38/221	0.6139		1	BovineHD0100003636	1	2	REC	0/34	2/257	1
1	ARS-BFGL-NGS-115663	12354879	1	0.05714	0.04259	2	0.537	1.362		1	ARS-BFGL-NGS-115663	1	2	DOM	4/31	22/248	0.5182		1	ARS-BFGL-NGS-115663	1	2	REC	0/35	1/269	1
1	BovineHD0100003683	12383178	2	0.1618	0.186	1	0.7396	0.8443		1	BovineHD0100003683	2	1	DOM	10/24	90/168	0.5705		1	BovineHD0100003683	2	1	REC	1/33	6/252	0.5836
1	BovineHD0100003686	12393568	2	0.5143	0.468	1	0.5248	1.203		1	BovineHD0100003686	2	1	DOM	25/10	193/73	0.8435		1	BovineHD0100003686	2	1	REC	11/24	56/210	0.1939
1	BTA-54331-no-rs	12430421	2	0.07143	0.07993	1	1	0.8855		1	BTA-54331-no-rs	2	1	DOM	5/30	42/227	1		1	BTA-54331-no-rs	2	1	REC	0/35	1/268	1
1	Hapmap43879-BTA-54328	12455251	2	0.1143	0.1463	1	0.5867	0.753		1	Hapmap43879-BTA-54328	2	1	DOM	8/27	75/195	0.687		1	Hapmap43879-BTA-54328	2	1	REC	0/35	4/266	1
1	Hapmap55464-rs29015665	12475971	2	0.4714	0.4907	1	0.8002	0.9255		1	Hapmap55464-rs29015665	2	1	DOM	24/11	203/67	0.4131		1	Hapmap55464-rs29015665	2	1	REC	9/26	62/208	0.6762
1	BTA-54318-no-rs	12497912	1	0.3611	0.3395	2	0.7916	1.1		1	BTA-54318-no-rs	1	2	DOM	18/18	153/118	0.4802		1	BTA-54318-no-rs	1	2	REC	8/28	31/240	0.104
1	BovineHD0100003734	12569498	2	0.5143	0.3914	1	0.05286	1.646		1	BovineHD0100003734	2	1	DOM	26/9	167/100	0.1946		1	BovineHD0100003734	2	1	REC	10/25	42/225	0.09148
1	BovineHD0100003761	12691827	1	0.3857	0.3214	2	0.2822	1.326		1	BovineHD0100003761	1	2	DOM	20/15	146/120	0.8579		1	BovineHD0100003761	1	2	REC	7/28	25/241	0.07513
1	BovineHD0100003770	12732497	2	0.4286	0.3494	1	0.2328	1.396		1	BovineHD0100003770	2	1	DOM	22/13	157/112	0.7159		1	BovineHD0100003770	2	1	REC	8/27	31/238	0.1009
1	BTB-00005611	12803538	2	0.2	0.2915	1	0.1212	0.6076		1	BTB-00005611	2	1	DOM	12/23	137/134	0.07507		1	BTB-00005611	2	1	REC	2/33	21/250	1
1	BovineHD0100003819	12940114	2	0.3429	0.2566	1	0.1497	1.512		1	BovineHD0100003819	2	1	DOM	20/15	123/142	0.2808		1	BovineHD0100003819	2	1	REC	4/31	13/252	0.1221
1	Hapmap60346-rs29019231	12988191	1	0.3333	0.3653	2	0.6956	0.8687		1	Hapmap60346-rs29019231	1	2	DOM	21/15	167/104	0.7186		1	Hapmap60346-rs29019231	1	2	REC	3/33	31/240	0.7795
1	BovineHD0100003869	13110312	2	0.2	0.2926	1	0.1208	0.6044		1	BovineHD0100003869	2	1	DOM	13/22	136/134	0.1541		1	BovineHD0100003869	2	1	REC	1/34	22/248	0.4926
1	Hapmap38791-BTA-89194	13177821	2	0.08571	0.07963	1	0.816	1.084		1	Hapmap38791-BTA-89194	2	1	DOM	6/29	43/227	0.8092		1	Hapmap38791-BTA-89194	2	1	REC	0/35	0/270	1
1	BovineHD0100003917	13253220	1	0.1	0.1887	2	0.06954	0.4778		1	BovineHD0100003917	1	2	DOM	7/28	94/171	0.08633		1	BovineHD0100003917	1	2	REC	0/35	6/259	1
1	ARS-BFGL-BAC-11044	13395358	1	0.1806	0.2638	2	0.1499	0.6148		1	ARS-BFGL-BAC-11044	1	2	DOM	13/23	127/144	0.2855		1	ARS-BFGL-BAC-11044	1	2	REC	0/36	16/255	0.2322
1	BovineHD4100000092	13527122	1	0.1857	0.2715	2	0.1482	0.6119		1	BovineHD4100000092	1	2	DOM	12/23	127/140	0.1525		1	BovineHD4100000092	1	2	REC	1/34	18/249	0.7087
1	ARS-BFGL-BAC-685	13575805	1	0.07143	0.08148	2	1	0.8671		1	ARS-BFGL-BAC-685	1	2	DOM	5/30	44/226	1		1	ARS-BFGL-BAC-685	1	2	REC	0/35	0/270	1
1	BovineHD0100004029	13601105	2	0.2571	0.3547	1	0.1394	0.6299		1	BovineHD0100004029	2	1	DOM	17/18	156/102	0.2019		1	BovineHD0100004029	2	1	REC	1/34	27/231	0.2218
1	BovineHD0100004039	13643769	1	0.2714	0.334	2	0.3433	0.743		1	BovineHD0100004039	1	2	DOM	17/18	150/115	0.3729		1	BovineHD0100004039	1	2	REC	2/33	27/238	0.5508
1	Hapmap24222-BTA-88936	13665306	2	0.3472	0.4151	1	0.3079	0.7494		1	Hapmap24222-BTA-88936	2	1	DOM	22/14	178/93	0.5819		1	Hapmap24222-BTA-88936	2	1	REC	3/33	47/224	0.2304
1	BovineHD0100004053	13702454	2	0.5571	0.468	1	0.1643	1.43		1	BovineHD0100004053	2	1	DOM	31/4	196/70	0.06079		1	BovineHD0100004053	2	1	REC	8/27	53/213	0.6587
1	ARS-BFGL-NGS-21333	13877483	2	0.2429	0.1278	1	0.01615	2.189		1	ARS-BFGL-NGS-21333	2	1	DOM	15/20	66/204	0.0256		1	ARS-BFGL-NGS-21333	2	1	REC	2/33	3/267	0.1025
1	BovineHD0100004106	13914324	1	0.3611	0.3926	2	0.6997	0.8745		1	BovineHD0100004106	1	2	DOM	23/13	178/92	0.8525		1	BovineHD0100004106	1	2	REC	3/33	34/236	0.5935
1	BovineHD0100004109	13925424	2	0.4143	0.485	1	0.3089	0.751		1	BovineHD0100004109	2	1	DOM	25/10	205/62	0.5274		1	BovineHD0100004109	2	1	REC	4/31	54/213	0.26
1	BovineHD0100004147	14064963	2	0.4286	0.3321	1	0.1401	1.509		1	BovineHD0100004147	2	1	DOM	23/12	150/115	0.3646		1	BovineHD0100004147	2	1	REC	7/28	26/239	0.08365
1	BovineHD0100004161	14122474	1	0.3714	0.2895	2	0.1665	1.45		1	BovineHD0100004161	1	2	DOM	21/14	134/132	0.3687		1	BovineHD0100004161	1	2	REC	5/30	20/246	0.1886
1	BovineHD0100004179	14218125	2	0.4028	0.417	1	0.8989	0.943		1	BovineHD0100004179	2	1	DOM	24/12	182/89	1		1	BovineHD0100004179	2	1	REC	5/31	44/227	1
1	BovineHD0100004186	14235061	1	0.3	0.3289	2	0.6852	0.8745		1	BovineHD0100004186	1	2	DOM	18/17	154/109	0.4685		1	BovineHD0100004186	1	2	REC	3/32	19/244	0.7316
1	BovineHD0100004251	14380075	1	0.1667	0.1455	2	0.5991	1.174		1	BovineHD0100004251	1	2	DOM	11/25	74/194	0.6962		1	BovineHD0100004251	1	2	REC	1/35	4/264	0.4699
1	BovineHD0100004290	14505711	1	0.1	0.1161	2	0.8423	0.8459		1	BovineHD0100004290	1	2	DOM	6/29	57/210	0.663		1	BovineHD0100004290	1	2	REC	1/34	5/262	0.5256
1	BTA-103292-no-rs	14533366	2	0.1	0.08333	1	0.6483	1.222		1	BTA-103292-no-rs	2	1	DOM	7/28	45/225	0.6339		1	BTA-103292-no-rs	2	1	REC	0/35	0/270	1
1	ARS-BFGL-NGS-26402	14579710	2	0.125	0.09963	1	0.5339	1.291		1	ARS-BFGL-NGS-26402	2	1	DOM	8/28	52/219	0.6572		1	ARS-BFGL-NGS-26402	2	1	REC	1/35	2/269	0.313
1	Hapmap24335-BTA-127763	14616735	1	0.5	0.4797	2	0.8022	1.085		1	Hapmap24335-BTA-127763	1	2	DOM	28/8	201/70	0.8386		1	Hapmap24335-BTA-127763	1	2	REC	8/28	59/212	1
1	ARS-BFGL-BAC-14883	14655035	1	0.1111	0.1882	2	0.1399	0.5392		1	ARS-BFGL-BAC-14883	1	2	DOM	8/28	94/177	0.1867		1	ARS-BFGL-BAC-14883	1	2	REC	0/36	8/263	0.6027
1	BovineHD0100004342	14735286	1	0.4571	0.4663	2	0.8994	0.9639		1	BovineHD0100004342	1	2	DOM	26/9	192/75	0.8434		1	BovineHD0100004342	1	2	REC	6/29	57/210	0.663
1	BovineHD0100004343	14740618	1	0.2429	0.3365	2	0.1358	0.6325		1	BovineHD0100004343	1	2	DOM	17/18	145/121	0.5895		1	BovineHD0100004343	1	2	REC	0/35	34/232	0.02022
1	BovineHD0100004359	14783511	2	0.3	0.3365	1	0.5912	0.8452		1	BovineHD0100004359	2	1	DOM	19/16	149/117	0.8582		1	BovineHD0100004359	2	1	REC	2/33	30/236	0.5568
1	BovineHD0100004373	14824048	2	0.08333	0.0653	1	0.6142	1.301		1	BovineHD0100004373	2	1	DOM	6/30	35/233	0.602		1	BovineHD0100004373	2	1	REC	0/36	0/268	1
1	BovineHD0100004398	14880156	2	0.3571	0.417	1	0.3675	0.7768		1	BovineHD0100004398	2	1	DOM	24/11	177/88	1		1	BovineHD0100004398	2	1	REC	1/34	44/221	0.04012
1	BovineHD0100004435	15009567	1	0.2571	0.2672	2	1	0.9495		1	BovineHD0100004435	1	2	DOM	17/18	117/145	0.7192		1	BovineHD0100004435	1	2	REC	1/34	23/239	0.3311
1	ARS-BFGL-NGS-107530	15017291	1	0.2083	0.2362	2	0.6586	0.8512		1	ARS-BFGL-NGS-107530	1	2	DOM	15/21	115/156	1		1	ARS-BFGL-NGS-107530	1	2	REC	0/36	13/258	0.3766
1	BTB-01807638	15049490	2	0.1714	0.1944	1	0.7479	0.8571		1	BTB-01807638	2	1	DOM	11/24	95/175	0.7102		1	BTB-01807638	2	1	REC	1/34	10/260	1
1	BTA-28028-no-rs	15092475	1	0.08571	0.09515	2	1	0.8915		1	BTA-28028-no-rs	1	2	DOM	6/29	47/221	1		1	BTA-28028-no-rs	1	2	REC	0/35	4/264	1
1	BTB-00502293	15126234	1	0.2083	0.2066	2	1	1.01		1	BTB-00502293	1	2	DOM	15/21	101/170	0.7148		1	BTB-00502293	1	2	REC	0/36	11/260	0.3737
1	BTA-97382-no-rs	15241004	1	0.4583	0.3635	2	0.1219	1.482		1	BTA-97382-no-rs	1	2	DOM	25/11	168/103	0.4644		1	BTA-97382-no-rs	1	2	REC	8/28	29/242	0.0568
1	BovineHD0100004528	15381892	1	0.4143	0.3759	2	0.6006	1.174		1	BovineHD0100004528	1	2	DOM	24/11	163/103	0.4619		1	BovineHD0100004528	1	2	REC	5/30	37/229	1
1	BovineHD0100004540	15430091	2	0.4118	0.3649	1	0.5046	1.219		1	BovineHD0100004540	2	1	DOM	22/12	156/103	0.7102		1	BovineHD0100004540	2	1	REC	6/28	33/226	0.4231
1	Hapmap50227-BTA-113868	15440999	2	0.4028	0.3192	1	0.1816	1.438		1	Hapmap50227-BTA-113868	2	1	DOM	22/14	146/125	0.4779		1	Hapmap50227-BTA-113868	2	1	REC	7/29	27/244	0.0947
1	BovineHD0100004550	15464786	1	0.3571	0.3596	2	1	0.9896		1	BovineHD0100004550	1	2	DOM	23/12	166/101	0.7152		1	BovineHD0100004550	1	2	REC	2/33	26/241	0.755
1	BovineHD0100004579	15508545	1	0.1857	0.1842	2	1	1.01		1	BovineHD0100004579	1	2	DOM	12/23	86/180	0.8488		1	BovineHD0100004579	1	2	REC	1/34	12/254	1
1	BovineHD0100004592	15557674	2	0.4286	0.4004	1	0.698	1.123		1	BovineHD0100004592	2	1	DOM	24/11	174/92	0.8501		1	BovineHD0100004592	2	1	REC	6/29	39/227	0.6229
1	BovineHD4100000100	15577736	2	0.3429	0.2738	1	0.2578	1.384		1	BovineHD4100000100	2	1	DOM	19/16	125/138	0.4765		1	BovineHD4100000100	2	1	REC	5/30	19/244	0.1782
1	ARS-BFGL-NGS-102441	15592825	2	0.2	0.2177	1	0.8773	0.8983		1	ARS-BFGL-NGS-102441	2	1	DOM	13/22	110/161	0.8549		1	ARS-BFGL-NGS-102441	2	1	REC	1/34	8/263	1
1	ARS-BFGL-BAC-13008	15612315	2	0.3143	0.2232	1	0.09921	1.595		1	ARS-BFGL-BAC-13008	2	1	DOM	20/15	111/160	0.07268		1	ARS-BFGL-BAC-13008	2	1	REC	2/33	10/261	0.6346
1	BTA-113886-no-rs	15643337	1	0.4571	0.5	2	0.5271	0.8421		1	BTA-113886-no-rs	1	2	DOM	24/11	202/68	0.4183		1	BTA-113886-no-rs	1	2	REC	8/27	68/202	0.8385
1	BTA-113888-no-rs	15669879	2	0.1571	0.1685	1	1	0.9199		1	BTA-113888-no-rs	2	1	DOM	10/25	87/183	0.8472		1	BTA-113888-no-rs	2	1	REC	1/34	4/266	0.4587
1	BovineHD0100004654	15699132	1	0.02857	0.03053	2	1	0.9338		1	BovineHD0100004654	1	2	DOM	2/33	16/246	1		1	BovineHD0100004654	1	2	REC	0/35	0/262	1
1	BovineHD0100004673	15757230	1	0.1857	0.1245	2	0.1856	1.603		1	BovineHD0100004673	1	2	DOM	11/24	65/200	0.4094		1	BovineHD0100004673	1	2	REC	2/33	1/264	0.03686
1	BovineHD0100004686	15816006	1	0.07143	0.07331	2	1	0.9724		1	BovineHD0100004686	1	2	DOM	5/30	39/227	1		1	BovineHD0100004686	1	2	REC	0/35	0/266	1
1	BovineHD0100004731	16007329	1	0.1429	0.218	2	0.162	0.5977		1	BovineHD0100004731	1	2	DOM	10/25	103/163	0.2706		1	BovineHD0100004731	1	2	REC	0/35	13/253	0.3759
1	Hapmap58809-rs29017514	16044068	2	0.1571	0.1771	1	0.8671	0.8662		1	Hapmap58809-rs29017514	2	1	DOM	10/25	92/179	0.5735		1	Hapmap58809-rs29017514	2	1	REC	1/34	4/267	0.4575
1	BTB-01193581	16114873	2	0.375	0.345	1	0.6017	1.139		1	BTB-01193581	2	1	DOM	23/13	151/120	0.3769		1	BTB-01193581	2	1	REC	4/32	36/235	1
1	BTB-00569345	16155668	1	0.1944	0.2435	2	0.4611	0.7497		1	BTB-00569345	1	2	DOM	13/23	110/161	0.7181		1	BTB-00569345	1	2	REC	1/35	22/249	0.4954
1	ARS-BFGL-NGS-95377	16186991	2	0.3143	0.3796	1	0.3576	0.749		1	ARS-BFGL-NGS-95377	2	1	DOM	21/14	171/99	0.7128		1	ARS-BFGL-NGS-95377	2	1	REC	1/34	34/236	0.1524
1	BTB-01193494	16265007	1	0.2714	0.2985	2	0.6787	0.8755		1	BTB-01193494	1	2	DOM	18/17	142/126	0.8596		1	BTB-01193494	1	2	REC	1/34	18/250	0.7085
1	ARS-BFGL-NGS-109692	16306198	1	0.04286	0.08148	2	0.3429	0.5047		1	ARS-BFGL-NGS-109692	1	2	DOM	3/32	43/227	0.3222		1	ARS-BFGL-NGS-109692	1	2	REC	0/35	1/269	1
1	BovineHD0100004829	16330432	2	0.1429	0.2113	1	0.2082	0.622		1	BovineHD0100004829	2	1	DOM	9/26	99/166	0.1951		1	BovineHD0100004829	2	1	REC	1/34	13/252	1
1	BovineHD0100004833	16355046	2	0.5143	0.4676	1	0.5244	1.206		1	BovineHD0100004833	2	1	DOM	27/8	190/72	0.6865		1	BovineHD0100004833	2	1	REC	9/26	55/207	0.5157
1	Hapmap41782-BTA-16216	16362952	2	0.2286	0.1667	1	0.239	1.481		1	Hapmap41782-BTA-16216	2	1	DOM	14/21	87/183	0.3482		1	Hapmap41782-BTA-16216	2	1	REC	2/33	3/267	0.1025
1	BTB-01999110	16403017	2	0.4286	0.3926	1	0.6042	1.16		1	BTB-01999110	2	1	DOM	26/9	174/96	0.3443		1	BTB-01999110	2	1	REC	4/31	38/232	0.7992
1	ARS-BFGL-NGS-32422	16447333	1	0.4	0.4944	2	0.162	0.6816		1	ARS-BFGL-NGS-32422	1	2	DOM	25/10	205/65	0.5377		1	ARS-BFGL-NGS-32422	1	2	REC	3/32	62/208	0.0506
1	BovineHD0100004898	16579388	2	0.3	0.3571	1	0.4241	0.7714		1	BovineHD0100004898	2	1	DOM	20/15	158/108	0.8556		1	BovineHD0100004898	2	1	REC	1/34	32/234	0.1478
1	BTA-110801-no-rs	16604159	2	0.3611	0.3229	1	0.5072	1.185		1	BTA-110801-no-rs	2	1	DOM	21/15	146/125	0.7224		1	BTA-110801-no-rs	2	1	REC	5/31	29/242	0.5718
1	BovineHD0100004919	16643923	1	0.1857	0.2356	2	0.4491	0.7398		1	BovineHD0100004919	1	2	DOM	13/22	113/148	0.5861		1	BovineHD0100004919	1	2	REC	0/35	10/251	0.6135
1	BovineHD0100004926	16666424	1	0.1857	0.2433	2	0.3685	0.7094		1	BovineHD0100004926	1	2	DOM	13/22	117/144	0.4694		1	BovineHD0100004926	1	2	REC	0/35	10/251	0.6135
1	BTB-01919348	16705237	1	0.05556	0.06089	2	1	0.9073		1	BTB-01919348	1	2	DOM	4/32	33/238	1		1	BTB-01919348	1	2	REC	0/36	0/271	1
1	BTB-01084253	16754495	2	0.08333	0.09594	1	1	0.8566		1	BTB-01084253	2	1	DOM	6/30	51/220	1		1	BTB-01084253	2	1	REC	0/36	1/270	1
1	ARS-BFGL-NGS-41853	16844981	2	0.1389	0.2103	1	0.2102	0.6055		1	ARS-BFGL-NGS-41853	2	1	DOM	9/27	102/169	0.1955		1	ARS-BFGL-NGS-41853	2	1	REC	1/35	12/259	1
1	BovineHD0100004973	16859361	2	0.3611	0.4539	1	0.1647	0.6801		1	BovineHD0100004973	2	1	DOM	23/13	194/77	0.3365		1	BovineHD0100004973	2	1	REC	3/33	52/219	0.1627
1	BovineHD0100004984	16929334	2	0.05556	0.09963	1	0.2871	0.5316		1	BovineHD0100004984	2	1	DOM	4/32	52/219	0.3569		1	BovineHD0100004984	2	1	REC	0/36	2/269	1
1	BTB-01083987	16967412	1	0.4167	0.4151	2	1	1.006		1	BTB-01083987	1	2	DOM	25/11	179/92	0.8512		1	BTB-01083987	1	2	REC	5/31	46/225	0.8128
1	Hapmap51162-BTA-118728	16993213	2	0.4306	0.4908	1	0.3803	0.7845		1	Hapmap51162-BTA-118728	2	1	DOM	26/10	203/68	0.6889		1	Hapmap51162-BTA-118728	2	1	REC	5/31	63/208	0.285
1	ARS-BFGL-NGS-22727	17041419	1	0.3194	0.3579	2	0.6002	0.842		1	ARS-BFGL-NGS-22727	1	2	DOM	20/16	162/109	0.7186		1	ARS-BFGL-NGS-22727	1	2	REC	3/33	32/239	0.7803
1	BTB-01872049	17105670	1	0.2361	0.2085	2	0.6449	1.173		1	BTB-01872049	1	2	DOM	16/20	107/164	0.5906		1	BTB-01872049	1	2	REC	1/35	6/265	0.5862
1	BovineHD0100005059	17170037	2	0.3714	0.3276	1	0.5001	1.213		1	BovineHD0100005059	2	1	DOM	23/12	151/110	0.4654		1	BovineHD0100005059	2	1	REC	3/32	20/241	0.7427
1	BTA-118719-no-rs	17192788	2	0.3611	0.329	1	0.5959	1.153		1	BTA-118719-no-rs	2	1	DOM	23/13	156/113	0.5901		1	BTA-118719-no-rs	2	1	REC	3/33	21/248	1
1	Hapmap60239-rs29019581	17235751	2	0.3194	0.2823	1	0.5791	1.193		1	Hapmap60239-rs29019581	2	1	DOM	22/14	136/135	0.2869		1	Hapmap60239-rs29019581	2	1	REC	1/35	17/254	0.7058
1	Hapmap39625-BTA-118605	17263605	2	0.1806	0.2528	1	0.1925	0.6513		1	Hapmap39625-BTA-118605	2	1	DOM	13/23	122/147	0.3722		1	Hapmap39625-BTA-118605	2	1	REC	0/36	14/255	0.3863
1	BTB-00757818	17350471	1	0.3286	0.3654	2	0.5975	0.8499		1	BTB-00757818	1	2	DOM	21/14	161/99	0.8543		1	BTB-00757818	1	2	REC	2/33	29/231	0.5547
1	BovineHD0100005100	17410539	1	0.3056	0.3628	2	0.3619	0.7728		1	BovineHD0100005100	1	2	DOM	20/16	166/100	0.4674		1	BovineHD0100005100	1	2	REC	2/34	27/239	0.5507
1	BTB-00757888	17441499	1	0.4306	0.4133	2	0.8	1.073		1	BTB-00757888	1	2	DOM	25/11	184/87	1		1	BTB-00757888	1	2	REC	6/30	40/231	0.8035
1	ARS-BFGL-NGS-51809	17481344	1	0.4444	0.4291	2	0.8015	1.064		1	ARS-BFGL-NGS-51809	1	2	DOM	26/10	183/85	0.705		1	ARS-BFGL-NGS-51809	1	2	REC	6/30	47/221	1
1	BTA-118731-no-rs	17513897	2	0.4167	0.5	1	0.21	0.7143		1	BTA-118731-no-rs	2	1	DOM	26/10	208/63	0.5367		1	BTA-118731-no-rs	2	1	REC	4/32	63/208	0.1316
1	BovineHD0100005160	17549923	2	0.3333	0.4234	1	0.1612	0.681		1	BovineHD0100005160	2	1	DOM	22/14	173/88	0.5764		1	BovineHD0100005160	2	1	REC	2/34	48/213	0.05795
1	BovineHD0100005187	17604891	2	0.3286	0.2746	1	0.3957	1.293		1	BovineHD0100005187	2	1	DOM	20/15	126/138	0.3687		1	BovineHD0100005187	2	1	REC	3/32	19/245	0.731
1	BovineHD0100005191	17630258	2	0.1571	0.1553	1	1	1.014		1	BovineHD0100005191	2	1	DOM	10/25	73/191	1		1	BovineHD0100005191	2	1	REC	1/34	9/255	1
1	Hapmap54349-rs29011587	17672335	2	0.04167	0.0572	1	0.7861	0.7167		1	Hapmap54349-rs29011587	2	1	DOM	3/33	30/241	0.7798		1	Hapmap54349-rs29011587	2	1	REC	0/36	1/270	1
1	Hapmap48613-BTA-112066	17806576	2	0.2083	0.125	1	0.06474	1.842		1	Hapmap48613-BTA-112066	2	1	DOM	15/21	64/204	0.02702		1	Hapmap48613-BTA-112066	2	1	REC	0/36	3/265	1
1	BTA-20344-no-rs	17839302	2	0.05556	0.07196	1	0.8066	0.7587		1	BTA-20344-no-rs	2	1	DOM	4/32	38/233	0.7989		1	BTA-20344-no-rs	2	1	REC	0/36	1/270	1
1	BovineHD0100005238	17886413	1	0.4429	0.3314	2	0.08125	1.603		1	BovineHD0100005238	1	2	DOM	28/7	150/114	0.009742		1	BovineHD0100005238	1	2	REC	3/32	25/239	1
1	ARS-BFGL-NGS-112632	17933659	1	0.3611	0.4502	2	0.1659	0.6903		1	ARS-BFGL-NGS-112632	1	2	DOM	24/12	191/80	0.6992		1	ARS-BFGL-NGS-112632	1	2	REC	2/34	53/218	0.03826
1	BTB-00005987	17957377	1	0.2222	0.2712	2	0.4775	0.7677		1	BTB-00005987	1	2	DOM	15/21	128/143	0.5957		1	BTB-00005987	1	2	REC	1/35	19/252	0.4873
1	Hapmap44269-BTA-67047	18013704	1	0.3472	0.316	2	0.5926	1.151		1	Hapmap44269-BTA-67047	1	2	DOM	23/13	145/124	0.2882		1	Hapmap44269-BTA-67047	1	2	REC	2/34	25/244	0.7536
1	BovineHD0100005323	18165726	1	0.5139	0.4808	2	0.6169	1.141		1	BovineHD0100005323	1	2	DOM	30/6	197/64	0.4025		1	BovineHD0100005323	1	2	REC	7/29	54/207	1
1	BovineHD0100005338	18249935	2	0.375	0.4944	1	0.06031	0.6137		1	BovineHD0100005338	2	1	DOM	26/10	197/69	0.8407		1	BovineHD0100005338	2	1	REC	1/35	66/200	0.001143
1	ARS-BFGL-NGS-26632	18299875	1	0.3333	0.2915	2	0.493	1.215		1	ARS-BFGL-NGS-26632	1	2	DOM	23/13	135/136	0.155		1	ARS-BFGL-NGS-26632	1	2	REC	1/35	23/248	0.332
1	BovineHD0100005358	18336197	1	0.1286	0.1353	2	1	0.9426		1	BovineHD0100005358	1	2	DOM	8/27	61/205	1		1	BovineHD0100005358	1	2	REC	1/34	11/255	1
1	BovineHD0100005377	18360408	1	0.2639	0.2167	2	0.3669	1.296		1	BovineHD0100005377	1	2	DOM	19/17	107/156	0.2079		1	BovineHD0100005377	1	2	REC	0/36	7/256	1
1	BTB-00006408	18378081	1	0.2778	0.2201	2	0.2944	1.362		1	BTB-00006408	1	2	DOM	20/16	110/158	0.1087		1	BTB-00006408	1	2	REC	0/36	8/260	0.6025
1	Hapmap28603-BTA-123758	18439746	1	0.01389	0.01107	2	0.5843	1.258		1	Hapmap28603-BTA-123758	1	2	DOM	1/35	6/265	0.5862		1	Hapmap28603-BTA-123758	1	2	REC	0/36	0/271	1
1	BovineHD0100005444	18544855	2	0.3	0.3008	1	1	0.9964		1	BovineHD0100005444	2	1	DOM	19/16	136/130	0.8575		1	BovineHD0100005444	2	1	REC	2/33	24/242	0.7511
1	BTB-01511695	18608496	2	0.3056	0.3315	1	0.6911	0.8874		1	BTB-01511695	2	1	DOM	20/16	155/115	0.8591		1	BTB-01511695	2	1	REC	2/34	24/246	0.7515
1	BTB-01511764	18640129	1	0.3611	0.4114	2	0.4455	0.8085		1	BTB-01511764	1	2	DOM	23/13	181/90	0.7115		1	BTB-01511764	1	2	REC	3/33	42/229	0.3227
1	BTB-01931918	18679090	2	0.4861	0.4686	1	0.8026	1.073		1	BTB-01931918	2	1	DOM	27/9	199/72	1		1	BTB-01931918	2	1	REC	8/28	55/216	0.8264
1	Hapmap50395-BTA-57301	18735528	2	0.2778	0.2944	1	0.8904	0.9216		1	Hapmap50395-BTA-57301	2	1	DOM	18/18	136/134	1		1	Hapmap50395-BTA-57301	2	1	REC	2/34	23/247	0.7509
1	BTA-06080-no-rs	18758458	2	0.2222	0.2974	1	0.2136	0.675		1	BTA-06080-no-rs	2	1	DOM	15/21	137/132	0.3752		1	BTA-06080-no-rs	2	1	REC	1/35	23/246	0.3317
1	BovineHD0100005509	18764873	1	0.4167	0.4591	2	0.5303	0.8415		1	BovineHD0100005509	1	2	DOM	26/10	199/70	0.8411		1	BovineHD0100005509	1	2	REC	4/32	48/221	0.4778
1	Hapmap33466-BTA-107178	18789066	1	0.1528	0.1586	2	1	0.9568		1	Hapmap33466-BTA-107178	1	2	DOM	10/26	80/188	0.8488		1	Hapmap33466-BTA-107178	1	2	REC	1/35	5/263	0.5337
1	BovineHD0100005518	18826962	2	0.2143	0.1386	1	0.1058	1.695		1	BovineHD0100005518	2	1	DOM	15/20	70/197	0.04657		1	BovineHD0100005518	2	1	REC	0/35	4/263	1
1	BovineHD0100005525	18866155	2	0.5286	0.3962	1	0.03885	1.709		1	BovineHD0100005525	2	1	DOM	30/5	178/87	0.03073		1	BovineHD0100005525	2	1	REC	7/28	32/233	0.1873
1	BovineHD0100005531	18918611	1	0.1528	0.2085	2	0.3481	0.6846		1	BovineHD0100005531	1	2	DOM	10/26	97/174	0.4567		1	BovineHD0100005531	1	2	REC	1/35	16/255	0.7037
1	BTB-01890165	18976190	1	0.02778	0.01107	2	0.2391	2.552		1	BTB-01890165	1	2	DOM	2/34	6/265	0.2386		1	BTB-01890165	1	2	REC	0/36	0/271	1
1	BTB-01342789	19016808	1	0.4861	0.3593	2	0.03891	1.687		1	BTB-01342789	1	2	DOM	30/6	162/108	0.005863		1	BTB-01342789	1	2	REC	5/31	32/238	0.7846
1	ARS-BFGL-NGS-1797	19040936	1	0.1389	0.1919	2	0.3344	0.6793		1	ARS-BFGL-NGS-1797	1	2	DOM	9/27	90/181	0.3506		1	ARS-BFGL-NGS-1797	1	2	REC	1/35	14/257	1
1	Hapmap47551-BTA-25902	19086376	2	0.2639	0.2852	1	0.7814	0.8986		1	Hapmap47551-BTA-25902	2	1	DOM	17/19	135/135	0.8595		1	Hapmap47551-BTA-25902	2	1	REC	2/34	19/251	1
1	BTA-120923-no-rs	19161658	2	0.3472	0.2732	1	0.2097	1.415		1	BTA-120923-no-rs	2	1	DOM	23/13	135/134	0.1553		1	BTA-120923-no-rs	2	1	REC	2/34	12/257	0.6745
1	BTA-26174-no-rs	19232342	2	0.2639	0.2907	1	0.68	0.8745		1	BTA-26174-no-rs	2	1	DOM	17/19	137/133	0.7255		1	BTA-26174-no-rs	2	1	REC	2/34	20/250	1
1	ARS-BFGL-NGS-111605	19266922	1	0.4028	0.4465	2	0.5288	0.8361		1	ARS-BFGL-NGS-111605	1	2	DOM	24/12	184/87	0.852		1	ARS-BFGL-NGS-111605	1	2	REC	5/31	58/213	0.382
1	ARS-BFGL-NGS-94650	19417856	2	0.1528	0.1778	1	0.7412	0.834		1	ARS-BFGL-NGS-94650	2	1	DOM	11/25	93/177	0.7111		1	ARS-BFGL-NGS-94650	2	1	REC	0/36	3/267	1
1	BovineHD0100005653	19448177	2	0.4306	0.5057	1	0.2591	0.7392		1	BovineHD0100005653	2	1	DOM	29/7	210/55	1		1	BovineHD0100005653	2	1	REC	2/34	58/207	0.02408
1	ARS-BFGL-NGS-7429	19455564	1	0.4028	0.3783	2	0.6996	1.108		1	ARS-BFGL-NGS-7429	1	2	DOM	25/11	167/100	0.466		1	ARS-BFGL-NGS-7429	1	2	REC	4/32	35/232	1
1	BTA-39405-no-rs	19485982	1	0.1806	0.1922	2	0.8746	0.9263		1	BTA-39405-no-rs	1	2	DOM	13/23	98/170	1		1	BTA-39405-no-rs	1	2	REC	0/36	5/263	1
1	BovineHD0100005688	19507076	2	0.3	0.3629	1	0.3524	0.7523		1	BovineHD0100005688	2	1	DOM	20/15	163/96	0.5782		1	BovineHD0100005688	2	1	REC	1/34	25/234	0.3363
1	BovineHD0100005700	19560010	1	0.4167	0.4045	2	0.8984	1.052		1	BovineHD0100005700	1	2	DOM	26/10	173/94	0.4565		1	BovineHD0100005700	1	2	REC	4/32	43/224	0.6238
1	BovineHD0100005713	19629594	1	0.4444	0.3421	2	0.1145	1.538		1	BovineHD0100005713	1	2	DOM	29/7	157/109	0.01661		1	BovineHD0100005713	1	2	REC	3/33	25/241	1
1	ARS-BFGL-NGS-29732	19691110	1	0.4167	0.4889	2	0.261	0.7466		1	ARS-BFGL-NGS-29732	1	2	DOM	26/10	201/70	0.8404		1	ARS-BFGL-NGS-29732	1	2	REC	4/32	64/207	0.1325
1	BovineHD0100005771	19903346	1	0.2917	0.2996	2	1	0.9625		1	BovineHD0100005771	1	2	DOM	18/18	137/130	1		1	BovineHD0100005771	1	2	REC	3/33	23/244	1
1	BovineHD0100005782	19928368	2	0.4714	0.4655	1	1	1.024		1	BovineHD0100005782	2	1	DOM	26/9	187/74	0.8428		1	BovineHD0100005782	2	1	REC	7/28	56/205	1
1	Hapmap38278-BTA-104803	19938721	2	0.01389	0.01661	1	1	0.8341		1	Hapmap38278-BTA-104803	2	1	DOM	1/35	9/262	1		1	Hapmap38278-BTA-104803	2	1	REC	0/36	0/271	1
1	BovineHD0100005789	19957793	1	0.4028	0.412	2	0.8993	0.9626		1	BovineHD0100005789	1	2	DOM	25/11	176/91	0.8512		1	BovineHD0100005789	1	2	REC	4/32	44/223	0.6258
1	BovineHD0100005800	20008856	1	0.2778	0.2816	2	1	0.9812		1	BovineHD0100005800	1	2	DOM	18/18	133/128	1		1	BovineHD0100005800	1	2	REC	2/34	14/247	1
1	BovineHD0100005805	20026148	2	0.4722	0.3893	1	0.2005	1.404		1	BovineHD0100005805	2	1	DOM	28/8	182/89	0.253		1	BovineHD0100005805	2	1	REC	6/30	29/242	0.272
1	BovineHD0100005816	20073891	1	0.3286	0.2973	2	0.5819	1.156		1	BovineHD0100005816	1	2	DOM	20/15	140/124	0.7199		1	BovineHD0100005816	1	2	REC	3/32	17/247	0.7152
1	BTA-119061-no-rs	20099965	1	0.06944	0.0738	2	1	0.9366		1	BTA-119061-no-rs	1	2	DOM	5/31	40/231	1		1	BTA-119061-no-rs	1	2	REC	0/36	0/271	1
1	UA-IFASA-3994	20175310	1	0.2639	0.2204	2	0.4526	1.268		1	UA-IFASA-3994	1	2	DOM	18/18	109/161	0.2848		1	UA-IFASA-3994	1	2	REC	1/35	10/260	1
1	BovineHD0100005852	20214044	2	0.2571	0.2256	1	0.5474	1.188		1	BovineHD0100005852	2	1	DOM	17/18	109/157	0.4667		1	BovineHD0100005852	2	1	REC	1/34	11/255	1
1	ARS-BFGL-BAC-11750	20285787	2	0.3194	0.2878	1	0.5827	1.161		1	ARS-BFGL-BAC-11750	2	1	DOM	21/15	141/130	0.5945		1	ARS-BFGL-BAC-11750	2	1	REC	2/34	15/256	1
1	Hapmap51222-BTA-39456	20312624	1	0.375	0.4907	2	0.07828	0.6227		1	Hapmap51222-BTA-39456	1	2	DOM	25/11	200/69	0.5474		1	Hapmap51222-BTA-39456	1	2	REC	2/34	64/205	0.009474
1	BovineHD0100005901	20320335	2	0.1857	0.1307	1	0.1999	1.517		1	BovineHD0100005901	2	1	DOM	12/23	68/196	0.3111		1	BovineHD0100005901	2	1	REC	1/34	1/263	0.2208
1	ARS-BFGL-NGS-34218	20336514	2	0.4028	0.4	1	1	1.012		1	ARS-BFGL-NGS-34218	2	1	DOM	25/11	175/90	0.851		1	ARS-BFGL-NGS-34218	2	1	REC	4/32	37/228	0.7986
1	Hapmap51978-BTA-39455	20362107	1	0.3194	0.3007	2	0.7852	1.091		1	Hapmap51978-BTA-39455	1	2	DOM	21/15	142/129	0.5948		1	Hapmap51978-BTA-39455	1	2	REC	2/34	21/250	1
1	BovineHD0100005920	20416935	1	0.4571	0.4034	2	0.4381	1.245		1	BovineHD0100005920	1	2	DOM	25/10	170/94	0.4558		1	BovineHD0100005920	1	2	REC	7/28	43/221	0.6293
1	BovineHD0100005928	20440130	2	0.5278	0.476	1	0.4521	1.23		1	BovineHD0100005928	2	1	DOM	28/8	191/80	0.4359		1	BovineHD0100005928	2	1	REC	10/26	67/204	0.6853
1	BovineHD0100005950	20541415	2	0.4167	0.3665	1	0.4369	1.234		1	BovineHD0100005950	2	1	DOM	26/10	156/110	0.1469		1	BovineHD0100005950	2	1	REC	4/32	39/227	0.7993
1	ARS-BFGL-NGS-116430	20588929	2	0.2778	0.2926	1	0.8904	0.9299		1	ARS-BFGL-NGS-116430	2	1	DOM	17/19	143/127	0.5952		1	ARS-BFGL-NGS-116430	2	1	REC	3/33	15/255	0.4548
1	BovineHD0100005970	20601715	2	0.07143	0.1154	1	0.3162	0.5897		1	BovineHD0100005970	2	1	DOM	5/30	59/201	0.3813		1	BovineHD0100005970	2	1	REC	0/35	1/259	1
1	BovineHD0100005989	20653453	2	0.4583	0.4682	1	0.9005	0.9612		1	BovineHD0100005989	2	1	DOM	27/9	197/70	1		1	BovineHD0100005989	2	1	REC	6/30	53/214	0.8233
1	Hapmap49594-BTA-39447	20667934	2	0.1111	0.1421	1	0.587	0.7549		1	Hapmap49594-BTA-39447	2	1	DOM	8/28	75/196	0.5547		1	Hapmap49594-BTA-39447	2	1	REC	0/36	2/269	1
1	ARS-BFGL-BAC-15578	20694788	2	0.02778	0.02214	1	0.6742	1.262		1	ARS-BFGL-BAC-15578	2	1	DOM	2/34	12/259	0.6728		1	ARS-BFGL-BAC-15578	2	1	REC	0/36	0/271	1
1	ARS-BFGL-NGS-10334	20716311	1	0.4444	0.4389	2	1	1.023		1	ARS-BFGL-NGS-10334	1	2	DOM	27/9	192/78	0.6981		1	ARS-BFGL-NGS-10334	1	2	REC	5/31	45/225	0.8129
1	BovineHD0100006007	20731028	1	0.3714	0.3853	2	0.8963	0.9426		1	BovineHD0100006007	1	2	DOM	23/12	174/92	1		1	BovineHD0100006007	1	2	REC	3/32	31/235	0.7792
1	BovineHD0100006010	20744177	2	0.3824	0.3726	1	0.8944	1.042		1	BovineHD0100006010	2	1	DOM	23/11	165/94	0.7075		1	BovineHD0100006010	2	1	REC	3/31	28/231	1
1	BovineHD0100006021	20780052	1	0.3056	0.2804	2	0.6771	1.129		1	BovineHD0100006021	1	2	DOM	21/15	136/135	0.3804		1	BovineHD0100006021	1	2	REC	1/35	16/255	0.7037
1	BTA-39438-no-rs	20799206	2	0.2639	0.203	1	0.2802	1.408		1	BTA-39438-no-rs	2	1	DOM	18/18	104/167	0.206		1	BTA-39438-no-rs	2	1	REC	1/35	6/265	0.5862
1	Hapmap28298-BTA-123775	20845227	2	0.4306	0.4813	1	0.4522	0.8147		1	Hapmap28298-BTA-123775	2	1	DOM	27/9	203/65	1		1	Hapmap28298-BTA-123775	2	1	REC	4/32	55/213	0.2606
1	Hapmap28872-BTA-162555	20921794	2	0.2917	0.2638	1	0.6707	1.149		1	Hapmap28872-BTA-162555	2	1	DOM	20/16	130/141	0.4785		1	Hapmap28872-BTA-162555	2	1	REC	1/35	13/258	1
1	BTA-116769-no-rs	20960607	2	0.375	0.4123	1	0.6101	0.8552		1	BTA-116769-no-rs	2	1	DOM	22/14	180/88	0.4593		1	BTA-116769-no-rs	2	1	REC	5/31	41/227	1
1	Hapmap52794-rs29023743	21005976	2	0.2778	0.2889	1	0.8907	0.9467		1	Hapmap52794-rs29023743	2	1	DOM	18/18	141/129	0.86		1	Hapmap52794-rs29023743	2	1	REC	2/34	15/255	1
1	BovineHD0100006078	21055167	1	0.3286	0.3102	2	0.7843	1.088		1	BovineHD0100006078	1	2	DOM	21/14	143/123	0.5888		1	BovineHD0100006078	1	2	REC	2/33	22/244	1
1	Hapmap54489-rs29018413	21096522	2	0.2222	0.1956	1	0.6371	1.175		1	Hapmap54489-rs29018413	2	1	DOM	16/20	101/170	0.4659		1	Hapmap54489-rs29018413	2	1	REC	0/36	5/266	1
1	Hapmap60044-rs29010295	21136787	2	0.375	0.3542	1	0.7936	1.094		1	Hapmap60044-rs29010295	2	1	DOM	24/12	164/107	0.5857		1	Hapmap60044-rs29010295	2	1	REC	3/33	28/243	1
1	Hapmap26189-BTA-157760	21178292	2	0.1111	0.1089	1	1	1.023		1	Hapmap26189-BTA-157760	2	1	DOM	8/28	58/213	1		1	Hapmap26189-BTA-157760	2	1	REC	0/36	1/270	1
1	ARS-BFGL-NGS-68915	21199202	1	0.2361	0.2934	2	0.3355	0.7445		1	ARS-BFGL-NGS-68915	1	2	DOM	16/20	135/136	0.5971		1	ARS-BFGL-NGS-68915	1	2	REC	1/35	24/247	0.3324
1	UA-IFASA-1500	21277546	2	0.3889	0.3598	1	0.6958	1.132		1	UA-IFASA-1500	2	1	DOM	24/12	163/108	0.4746		1	UA-IFASA-1500	2	1	REC	4/32	32/239	1
1	UA-IFASA-9700	21310574	2	0.2361	0.2915	1	0.4045	0.7512		1	UA-IFASA-9700	2	1	DOM	16/20	135/136	0.5971		1	UA-IFASA-9700	2	1	REC	1/35	23/248	0.332
1	Hapmap39987-BTA-25749	21358879	1	0.4444	0.4077	2	0.6106	1.162		1	Hapmap39987-BTA-25749	1	2	DOM	26/10	175/96	0.4565		1	Hapmap39987-BTA-25749	1	2	REC	6/30	46/225	1
1	BovineHD0100006201	21422169	2	0.375	0.3487	1	0.6942	1.121		1	BovineHD0100006201	2	1	DOM	24/12	162/109	0.4723		1	BovineHD0100006201	2	1	REC	3/33	27/244	1
1	ARS-BFGL-NGS-41203	21457294	2	0.4167	0.4188	1	1	0.9912		1	ARS-BFGL-NGS-41203	2	1	DOM	23/13	181/90	0.7115		1	ARS-BFGL-NGS-41203	2	1	REC	7/29	46/225	0.6463
1	Hapmap49929-BTA-24619	21533511	1	0.4583	0.4613	2	1	0.9883		1	Hapmap49929-BTA-24619	1	2	DOM	26/10	198/73	1		1	Hapmap49929-BTA-24619	1	2	REC	7/29	52/219	1
1	BovineHD0100006241	21565267	2	0.1667	0.1222	1	0.3449	1.436		1	BovineHD0100006241	2	1	DOM	12/24	63/207	0.2161		1	BovineHD0100006241	2	1	REC	0/36	3/267	1
1	BovineHD0100006242	21574750	2	0.2222	0.2528	1	0.6643	0.8446		1	BovineHD0100006242	2	1	DOM	15/21	124/147	0.7229		1	BovineHD0100006242	2	1	REC	1/35	13/258	1
1	BovineHD0100006253	21599174	2	0.3889	0.4294	1	0.5289	0.8457		1	BovineHD0100006253	2	1	DOM	25/11	189/80	1		1	BovineHD0100006253	2	1	REC	3/33	42/227	0.3222
1	ARS-BFGL-NGS-100534	21646634	1	0.2639	0.2952	2	0.6792	0.8559		1	ARS-BFGL-NGS-100534	1	2	DOM	18/18	142/129	0.8598		1	ARS-BFGL-NGS-100534	1	2	REC	1/35	18/253	0.7099
1	BovineHD0100006280	21662722	1	0.4306	0.4315	2	1	0.9962		1	BovineHD0100006280	1	2	DOM	26/10	187/83	0.8477		1	BovineHD0100006280	1	2	REC	5/31	46/224	0.8128
1	BovineHD0100006290	21691443	1	0.3333	0.3426	2	1	0.9595		1	BovineHD0100006290	1	2	DOM	23/13	155/115	0.4791		1	BovineHD0100006290	1	2	REC	1/35	30/240	0.1483
1	Hapmap53902-rs29027390	21725158	1	0.3472	0.3506	2	1	0.9854		1	Hapmap53902-rs29027390	1	2	DOM	21/15	158/113	1		1	Hapmap53902-rs29027390	1	2	REC	4/32	32/239	1
1	BovineHD0100006309	21744486	2	0.3333	0.3537	1	0.7935	0.9136		1	BovineHD0100006309	2	1	DOM	20/16	161/109	0.7189		1	BovineHD0100006309	2	1	REC	4/32	30/240	1
1	BovineHD0100006311	21750572	1	0.2083	0.1718	2	0.4147	1.269		1	BovineHD0100006311	1	2	DOM	13/23	81/181	0.5678		1	BovineHD0100006311	1	2	REC	2/34	9/253	0.6285
1	BTB-01332122	21764241	1	0.3194	0.3469	2	0.6935	0.8838		1	BTB-01332122	1	2	DOM	20/16	158/113	0.8577		1	BTB-01332122	1	2	REC	3/33	30/241	0.7798
1	BovineHD0100006326	21792273	1	0.4444	0.3926	2	0.4425	1.238		1	BovineHD0100006326	1	2	DOM	26/10	170/100	0.3558		1	BovineHD0100006326	1	2	REC	6/30	42/228	0.81
1	BTB-01210202	21828827	2	0.01389	0.02214	1	1	0.6221		1	BTB-01210202	2	1	DOM	1/35	12/259	1		1	BTB-01210202	2	1	REC	0/36	0/271	1
1	BovineHD0100006343	21849432	2	0.4306	0.4291	1	1	1.006		1	BovineHD0100006343	2	1	DOM	24/12	176/92	1		1	BovineHD0100006343	2	1	REC	7/29	54/214	1
1	BovineHD0100006365	21909852	2	0.1667	0.1852	1	0.8711	0.88		1	BovineHD0100006365	2	1	DOM	12/24	89/181	1		1	BovineHD0100006365	2	1	REC	0/36	11/259	0.3734
1	BTB-01210232	21927942	2	0	0.02952	1	0.2386	0		1	BTB-01210232	2	1	DOM	0/36	16/255	0.2322		1	BTB-01210232	2	1	REC	0/36	0/271	1
1	BTB-01116114	22034195	2	0.2361	0.3192	1	0.1754	0.6593		1	BTB-01116114	2	1	DOM	16/20	148/123	0.2879		1	BTB-01116114	2	1	REC	1/35	25/246	0.3354
1	BovineHD0100006395	22053575	2	0.09722	0.1352	1	0.4584	0.6889		1	BovineHD0100006395	2	1	DOM	7/29	70/200	0.5398		1	BovineHD0100006395	2	1	REC	0/36	3/267	1
1	BovineHD0100006403	22090208	2	0.1389	0.2199	1	0.125	0.5721		1	BovineHD0100006403	2	1	DOM	10/26	103/163	0.2708		1	BovineHD0100006403	2	1	REC	0/36	14/252	0.3876
1	BovineHD0100006405	22101301	2	0.1944	0.2041	1	1	0.9412		1	BovineHD0100006405	2	1	DOM	13/23	101/166	1		1	BovineHD0100006405	2	1	REC	1/35	8/259	1
1	BovineHD0100006407	22106567	1	0.2361	0.2698	2	0.6698	0.8365		1	BovineHD0100006407	1	2	DOM	15/21	127/138	0.5941		1	BovineHD0100006407	1	2	REC	2/34	16/249	1
1	Hapmap42716-BTA-88423	22125251	1	0.04167	0.06827	2	0.6092	0.5934		1	Hapmap42716-BTA-88423	1	2	DOM	3/33	36/235	0.5943		1	Hapmap42716-BTA-88423	1	2	REC	0/36	1/270	1
1	BTB-01897472	22210184	2	0.4306	0.4963	1	0.3171	0.7673		1	BTB-01897472	2	1	DOM	26/10	203/68	0.6889		1	BTB-01897472	2	1	REC	5/31	66/205	0.2079
1	BTA-07140-rs29026807	22267765	2	0.04167	0.05351	1	1	0.7691		1	BTA-07140-rs29026807	2	1	DOM	3/33	29/242	1		1	BTA-07140-rs29026807	2	1	REC	0/36	0/271	1
1	BovineHD0100006446	22274799	1	0.04167	0.06391	2	0.6055	0.6368		1	BovineHD0100006446	1	2	DOM	3/33	34/232	0.5929		1	BovineHD0100006446	1	2	REC	0/36	0/266	1
1	BovineHD0100006466	22338247	2	0.5	0.4326	1	0.3123	1.312		1	BovineHD0100006466	2	1	DOM	31/5	191/76	0.07195		1	BovineHD0100006466	2	1	REC	5/31	40/227	1
1	ARS-BFGL-NGS-51361	22359893	2	0.2917	0.2804	1	0.8892	1.057		1	ARS-BFGL-NGS-51361	2	1	DOM	20/16	131/140	0.4795		1	ARS-BFGL-NGS-51361	2	1	REC	1/35	21/250	0.49
1	ARS-BFGL-BAC-15637	22421404	2	0.06944	0.1052	1	0.4115	0.635		1	ARS-BFGL-BAC-15637	2	1	DOM	5/31	56/215	0.504		1	ARS-BFGL-BAC-15637	2	1	REC	0/36	1/270	1
1	BovineHD0100006497	22430817	1	0.25	0.2755	2	0.7779	0.8767		1	BovineHD0100006497	1	2	DOM	17/19	126/139	1		1	BovineHD0100006497	1	2	REC	1/35	20/245	0.4874
1	UA-IFASA-9053	22459664	2	0.08333	0.1162	1	0.5509	0.6912		1	UA-IFASA-9053	2	1	DOM	6/30	59/212	0.664		1	UA-IFASA-9053	2	1	REC	0/36	4/267	1
1	BovineHD0100006515	22504689	2	0.2778	0.2753	1	1	1.013		1	BovineHD0100006515	2	1	DOM	18/18	134/133	1		1	BovineHD0100006515	2	1	REC	2/34	13/254	0.695
1	ARS-BFGL-NGS-117957	22525457	1	0.5278	0.4797	2	0.4544	1.212		1	ARS-BFGL-NGS-117957	1	2	DOM	27/9	201/70	1		1	ARS-BFGL-NGS-117957	1	2	REC	11/25	59/212	0.2892
1	BTB-00010729	22568717	2	0.06944	0.09779	1	0.5264	0.6885		1	BTB-00010729	2	1	DOM	5/31	49/222	0.6463		1	BTB-00010729	2	1	REC	0/36	4/267	1
1	BovineHD0100006555	22591077	1	0.3333	0.3502	2	0.8952	0.9278		1	BovineHD0100006555	1	2	DOM	21/15	161/106	0.8572		1	BovineHD0100006555	1	2	REC	3/33	26/241	1
1	BTA-59229-no-rs	22604778	1	0.05556	0.07778	2	0.638	0.6975		1	BTA-59229-no-rs	1	2	DOM	4/32	39/231	0.799		1	BTA-59229-no-rs	1	2	REC	0/36	3/267	1
1	BovineHD0100006562	22622795	2	0.3611	0.3875	1	0.7007	0.8936		1	BovineHD0100006562	2	1	DOM	22/14	169/102	1		1	BovineHD0100006562	2	1	REC	4/32	41/230	0.6245
1	BovineHD0100006581	22659683	1	0.3889	0.3764	2	0.8972	1.054		1	BovineHD0100006581	1	2	DOM	24/12	169/102	0.7148		1	BovineHD0100006581	1	2	REC	4/32	35/236	1
1	ARS-BFGL-NGS-118519	22681024	2	0.375	0.3782	1	1	0.9863		1	ARS-BFGL-NGS-118519	2	1	DOM	23/13	172/99	1		1	ARS-BFGL-NGS-118519	2	1	REC	4/32	33/238	1
1	BovineHD0100006599	22777886	2	0.04167	0.04815	1	1	0.8595		1	BovineHD0100006599	2	1	DOM	3/33	26/244	1		1	BovineHD0100006599	2	1	REC	0/36	0/270	1
1	BTA-120720-no-rs	22901046	2	0.4167	0.4742	1	0.381	0.7921		1	BTA-120720-no-rs	2	1	DOM	26/10	199/72	0.8436		1	BTA-120720-no-rs	2	1	REC	4/32	58/213	0.187
1	BTB-00011076	23001427	2	0.4583	0.5037	1	0.531	0.8338		1	BTB-00011076	2	1	DOM	25/11	204/67	0.4239		1	BTB-00011076	2	1	REC	8/28	69/202	0.8383
1	BovineHD0100006669	23080610	2	0.2083	0.2528	1	0.4693	0.7779		1	BovineHD0100006669	2	1	DOM	14/22	124/147	0.4795		1	BovineHD0100006669	2	1	REC	1/35	13/258	1
1	BTB-02025707	23125028	1	0.3333	0.3542	2	0.7935	0.9115		1	BTB-02025707	1	2	DOM	22/14	163/108	1		1	BTB-02025707	1	2	REC	2/34	29/242	0.5542
1	BovineHD0100006687	23140537	2	0.1528	0.1364	1	0.7161	1.142		1	BovineHD0100006687	2	1	DOM	11/25	68/196	0.5483		1	BovineHD0100006687	2	1	REC	0/36	4/260	1
1	BTB-01548042	23214124	1	0.2361	0.2491	2	0.8851	0.9319		1	BTB-01548042	1	2	DOM	16/20	123/148	1		1	BTB-01548042	1	2	REC	1/35	12/259	1
1	BTB-01438016	23317578	1	0.08333	0.1511	2	0.1514	0.5107		1	BTB-01438016	1	2	DOM	6/30	75/193	0.1657		1	BTB-01438016	1	2	REC	0/36	6/262	1
1	BovineHD0100006735	23335758	1	0.3056	0.3948	2	0.1574	0.6744		1	BovineHD0100006735	1	2	DOM	20/16	175/96	0.3569		1	BovineHD0100006735	1	2	REC	2/34	39/232	0.1937
1	BTB-01562871	23382846	2	0.1667	0.2556	1	0.1097	0.5826		1	BTB-01562871	2	1	DOM	11/25	122/148	0.1091		1	BTB-01562871	2	1	REC	1/35	16/254	0.7037
1	BovineHD0100006749	23404797	2	0.09722	0.1629	1	0.168	0.5533		1	BovineHD0100006749	2	1	DOM	7/29	80/187	0.2403		1	BovineHD0100006749	2	1	REC	0/36	7/260	1
1	BovineHD0100006765	23451433	2	0.4571	0.4135	1	0.5204	1.194		1	BovineHD0100006765	2	1	DOM	25/10	182/84	0.8469		1	BovineHD0100006765	2	1	REC	7/28	38/228	0.4471
1	ARS-BFGL-NGS-97225	23477787	1	0.25	0.1919	2	0.2707	1.404		1	ARS-BFGL-NGS-97225	1	2	DOM	18/18	96/175	0.1001		1	ARS-BFGL-NGS-97225	1	2	REC	0/36	8/263	0.6027
1	BovineHD0100006803	23554870	1	0.375	0.2838	2	0.1294	1.514		1	BovineHD0100006803	1	2	DOM	24/12	137/129	0.1091		1	BovineHD0100006803	1	2	REC	3/33	14/252	0.4382
1	ARS-BFGL-NGS-29682	23661806	2	0.3889	0.4354	1	0.5268	0.8251		1	ARS-BFGL-NGS-29682	2	1	DOM	23/13	186/85	0.572		1	ARS-BFGL-NGS-29682	2	1	REC	5/31	50/221	0.6458
1	BTB-01153392	23709011	2	0.09722	0.1033	1	1	0.9346		1	BTB-01153392	2	1	DOM	7/29	52/219	1		1	BTB-01153392	2	1	REC	0/36	4/267	1
1	BovineHD0100006868	23712951	2	0.3194	0.3308	1	0.8944	0.9494		1	BovineHD0100006868	2	1	DOM	19/17	147/119	0.8589		1	BovineHD0100006868	2	1	REC	4/32	29/237	1
1	BTB-01153206	23747154	2	0.4167	0.4114	1	1	1.022		1	BTB-01153206	2	1	DOM	23/13	176/95	1		1	BTB-01153206	2	1	REC	7/29	47/224	0.8156
1	BovineHD0100006883	23775870	1	0.1667	0.1365	2	0.4721	1.265		1	BovineHD0100006883	1	2	DOM	12/24	68/203	0.3139		1	BovineHD0100006883	1	2	REC	0/36	6/265	1
1	BTB-01153241	23797034	1	0.4861	0.4926	2	1	0.9743		1	BTB-01153241	1	2	DOM	25/11	198/73	0.6915		1	BTB-01153241	1	2	REC	10/26	69/202	0.8393
1	Hapmap32844-BTA-151959	23863105	1	0.2361	0.2749	2	0.5727	0.8153		1	Hapmap32844-BTA-151959	1	2	DOM	17/19	132/139	1		1	Hapmap32844-BTA-151959	1	2	REC	0/36	17/254	0.2369
1	BovineHD0100006928	23904271	2	0.05556	0.05283	1	0.7855	1.055		1	BovineHD0100006928	2	1	DOM	4/32	28/237	1		1	BovineHD0100006928	2	1	REC	0/36	0/265	1
1	BovineHD0100006929	23905003	2	0.05556	0.05283	1	0.7855	1.055		1	BovineHD0100006929	2	1	DOM	4/32	28/237	1		1	BovineHD0100006929	2	1	REC	0/36	0/265	1
1	BTB-01885509	23916098	1	0.3333	0.3333	2	1	1		1	BTB-01885509	1	2	DOM	22/14	153/117	0.7207		1	BTB-01885509	1	2	REC	2/34	27/243	0.551
1	BovineHD0100006936	23918911	1	0.2361	0.2528	2	0.8851	0.9137		1	BovineHD0100006936	1	2	DOM	17/19	123/148	0.8602		1	BovineHD0100006936	1	2	REC	0/36	14/257	0.3854
1	BovineHD0100006920	23943176	2	0.3333	0.3278	1	1	1.025		1	BovineHD0100006920	2	1	DOM	22/14	149/121	0.593		1	BovineHD0100006920	2	1	REC	2/34	28/242	0.5518
1	BTB-01821892	23946108	2	0.3056	0.3081	1	1	0.988		1	BTB-01821892	2	1	DOM	22/14	145/126	0.477		1	BTB-01821892	2	1	REC	0/36	22/249	0.08911
1	BovineHD0100006946	23970626	2	0.25	0.2823	1	0.6749	0.8475		1	BovineHD0100006946	2	1	DOM	18/18	134/137	1		1	BovineHD0100006946	2	1	REC	0/36	19/252	0.1436
1	ARS-BFGL-BAC-16283	23977117	1	0.1667	0.1896	2	0.7483	0.8549		1	ARS-BFGL-BAC-16283	1	2	DOM	12/24	93/176	1		1	ARS-BFGL-BAC-16283	1	2	REC	0/36	9/260	0.6056
1	BTB-00008466	23998494	2	0.3056	0.3414	1	0.597	0.8487		1	BTB-00008466	2	1	DOM	20/16	151/117	1		1	BTB-00008466	2	1	REC	2/34	32/236	0.3973
1	BovineHD0100006952	24003791	2	0.4028	0.4453	1	0.5288	0.8402		1	BovineHD0100006952	2	1	DOM	23/13	182/83	0.5713		1	BovineHD0100006952	2	1	REC	6/30	54/211	0.824
1	BovineHD0100006959	24044449	1	0.3194	0.3284	2	1	0.9599		1	BovineHD0100006959	1	2	DOM	20/16	148/123	1		1	BovineHD0100006959	1	2	REC	3/33	30/241	0.7798
1	Hapmap60828-rs29019992	24099198	2	0.2361	0.2103	1	0.6462	1.16		1	Hapmap60828-rs29019992	2	1	DOM	17/19	107/164	0.3735		1	Hapmap60828-rs29019992	2	1	REC	0/36	7/264	1
1	ARS-BFGL-NGS-110541	24136861	2	0.5139	0.4742	1	0.5331	1.172		1	ARS-BFGL-NGS-110541	2	1	DOM	28/8	198/73	0.6881		1	ARS-BFGL-NGS-110541	2	1	REC	9/27	59/212	0.671
1	ARS-BFGL-BAC-6737	24168476	2	0.2778	0.2944	1	0.8904	0.9216		1	ARS-BFGL-BAC-6737	2	1	DOM	17/19	136/134	0.8594		1	ARS-BFGL-BAC-6737	2	1	REC	3/33	23/247	1
1	BovineHD0100006989	24193638	2	0.1389	0.1556	1	0.862	0.8756		1	BovineHD0100006989	2	1	DOM	10/26	81/189	0.8485		1	BovineHD0100006989	2	1	REC	0/36	3/267	1
1	BTA-49259-no-rs	24222791	2	0.1944	0.2085	1	0.8775	0.9164		1	BTA-49259-no-rs	2	1	DOM	14/22	104/167	1		1	BTA-49259-no-rs	2	1	REC	0/36	9/262	0.6054
1	BovineHD0100007001	24250187	2	0.2083	0.2138	1	1	0.968		1	BovineHD0100007001	2	1	DOM	14/22	105/164	1		1	BovineHD0100007001	2	1	REC	1/35	10/259	1
1	BTA-49269-no-rs	24280702	1	0.375	0.3303	2	0.5067	1.217		1	BTA-49269-no-rs	1	2	DOM	23/13	152/119	0.4741		1	BTA-49269-no-rs	1	2	REC	4/32	27/244	0.771
1	BovineHD0100007019	24308441	1	0.1667	0.1863	2	0.7489	0.8733		1	BovineHD0100007019	1	2	DOM	12/24	92/179	1		1	BovineHD0100007019	1	2	REC	0/36	9/262	0.6054
1	BovineHD0100007023	24321697	1	0.3333	0.3891	2	0.4384	0.785		1	BovineHD0100007023	1	2	DOM	22/14	170/96	0.8538		1	BovineHD0100007023	1	2	REC	2/34	37/229	0.1946
1	BTB-01976950	24356429	2	0.125	0.1199	1	0.8485	1.048		1	BTB-01976950	2	1	DOM	9/27	62/209	0.8336		1	BTB-01976950	2	1	REC	0/36	3/268	1
1	BovineHD0100007038	24374438	2	0.2639	0.2892	1	0.7813	0.8812		1	BovineHD0100007038	2	1	DOM	18/18	137/131	1		1	BovineHD0100007038	2	1	REC	1/35	18/250	0.7107
1	BovineHD0100007040	24382082	2	0.3333	0.3843	1	0.4393	0.801		1	BovineHD0100007040	2	1	DOM	22/14	169/99	0.8553		1	BovineHD0100007040	2	1	REC	2/34	37/231	0.2842
1	BovineHD0100007049	24414918	1	0.3611	0.4336	2	0.2562	0.7384		1	BovineHD0100007049	1	2	DOM	21/15	185/86	0.2591		1	BovineHD0100007049	1	2	REC	5/31	50/221	0.6458
1	UA-IFASA-5116	24486748	2	0.1806	0.1531	1	0.6038	1.219		1	UA-IFASA-5116	2	1	DOM	12/24	80/191	0.6992		1	UA-IFASA-5116	2	1	REC	1/35	3/268	0.3944
1	BTB-00007882	24541288	1	0.3056	0.3653	2	0.3611	0.7644		1	BTB-00007882	1	2	DOM	18/18	158/113	0.3732		1	BTB-00007882	1	2	REC	4/32	40/231	0.7999
1	BovineHD0100007103	24562856	1	0.2639	0.3123	2	0.4963	0.7895		1	BovineHD0100007103	1	2	DOM	16/20	139/130	0.4792		1	BovineHD0100007103	1	2	REC	3/33	29/240	1
1	Hapmap52764-rs29022780	24625263	2	0.2639	0.3026	1	0.5839	0.8263		1	Hapmap52764-rs29022780	2	1	DOM	15/21	141/130	0.2883		1	Hapmap52764-rs29022780	2	1	REC	4/32	23/248	0.5381
1	BTB-00008090	24677050	2	0.1111	0.1407	1	0.587	0.7632		1	BTB-00008090	2	1	DOM	8/28	71/199	0.6887		1	BTB-00008090	2	1	REC	0/36	5/265	1
1	BovineHD0100007162	24715129	2	0.2083	0.1716	1	0.4148	1.271		1	BovineHD0100007162	2	1	DOM	14/22	81/190	0.337		1	BovineHD0100007162	2	1	REC	1/35	12/259	1
1	BovineHD0100007166	24727812	1	0.2778	0.2778	2	1	1		1	BovineHD0100007166	1	2	DOM	17/19	128/142	1		1	BovineHD0100007166	1	2	REC	3/33	22/248	1
1	BTA-49236-no-rs	24736398	2	0.04167	0.04797	1	1	0.8629		1	BTA-49236-no-rs	2	1	DOM	3/33	26/245	1		1	BTA-49236-no-rs	2	1	REC	0/36	0/271	1
1	BTB-00008277	24758865	1	0.04167	0.05597	2	0.7859	0.7333		1	BTB-00008277	1	2	DOM	3/33	29/239	1		1	BTB-00008277	1	2	REC	0/36	1/267	1
1	BovineHD0100007185	24765640	1	0.4444	0.4904	2	0.5297	0.8314		1	BovineHD0100007185	1	2	DOM	25/11	194/66	0.5443		1	BovineHD0100007185	1	2	REC	7/29	61/199	0.6772
1	Hapmap52220-rs29016259	24782983	2	0.4167	0.3579	1	0.3623	1.281		1	Hapmap52220-rs29016259	2	1	DOM	25/11	161/110	0.28		1	Hapmap52220-rs29016259	2	1	REC	5/31	33/238	0.7875
1	BTA-49243-no-rs	24819532	2	0.375	0.3685	1	0.8975	1.028		1	BTA-49243-no-rs	2	1	DOM	24/12	161/109	0.4715		1	BTA-49243-no-rs	2	1	REC	3/33	38/232	0.442
1	BTA-15153-rs29026518	24841162	1	0.02778	0.03903	2	1	0.7034		1	BTA-15153-rs29026518	1	2	DOM	2/34	21/248	1		1	BTA-15153-rs29026518	1	2	REC	0/36	0/269	1
1	BovineHD0100007225	24901336	1	0.5	0.483	2	0.8028	1.07		1	BovineHD0100007225	1	2	DOM	28/8	196/69	0.6892		1	BovineHD0100007225	1	2	REC	8/28	60/205	1
1	BovineHD0100007238	24964189	1	0.2361	0.1546	2	0.08995	1.69		1	BovineHD0100007238	1	2	DOM	15/21	76/186	0.127		1	BovineHD0100007238	1	2	REC	2/34	5/257	0.2021
1	BTB-00014074	24984897	1	0.4444	0.4889	2	0.531	0.8362		1	BTB-00014074	1	2	DOM	25/11	203/68	0.5428		1	BTB-00014074	1	2	REC	7/29	62/209	0.8319
1	ARS-BFGL-BAC-11218	25027851	1	0.2639	0.2556	2	0.8862	1.044		1	ARS-BFGL-BAC-11218	1	2	DOM	15/21	118/152	0.8596		1	ARS-BFGL-BAC-11218	1	2	REC	4/32	20/250	0.5039
1	BovineHD0100007277	25086040	1	0.3194	0.3365	2	0.8942	0.9257		1	BovineHD0100007277	1	2	DOM	20/16	151/115	1		1	BovineHD0100007277	1	2	REC	3/33	28/238	1
1	ARS-BFGL-NGS-19076	25126982	1	0.4444	0.487	2	0.5316	0.8426		1	ARS-BFGL-NGS-19076	1	2	DOM	25/11	199/71	0.5553		1	ARS-BFGL-NGS-19076	1	2	REC	7/29	64/206	0.6772
1	BovineHD0100007296	25144847	2	0.1667	0.211	1	0.4395	0.7477		1	BovineHD0100007296	2	1	DOM	11/25	97/166	0.5795		1	BovineHD0100007296	2	1	REC	1/35	14/249	1
1	chr1_24670381	25147117	1	0.1111	0.132	2	0.7118	0.8222		1	chr1_24670381	1	2	DOM	7/29	64/205	0.677		1	chr1_24670381	1	2	REC	1/35	7/262	1
1	BovineHD0100007305	25161217	1	0.3333	0.3096	2	0.6856	1.115		1	BovineHD0100007305	1	2	DOM	20/16	133/127	0.7226		1	BovineHD0100007305	1	2	REC	4/32	28/232	1
1	BTB-00010532	25169655	1	0.2639	0.2778	2	0.8888	0.9321		1	BTB-00010532	1	2	DOM	17/19	131/139	1		1	BTB-00010532	1	2	REC	2/34	19/251	1
1	BovineHD0100007320	25216165	1	0.2778	0.2643	2	0.778	1.071		1	BovineHD0100007320	1	2	DOM	19/17	123/140	0.5941		1	BovineHD0100007320	1	2	REC	1/35	16/247	0.7039
1	BovineHD4100000146	25262463	2	0.01389	0.02863	1	0.7072	0.4779		1	BovineHD4100000146	2	1	DOM	1/35	14/248	1		1	BovineHD4100000146	2	1	REC	0/36	1/261	1
1	Hapmap39274-BTA-49324	25283617	1	0.2222	0.262	2	0.5663	0.8048		1	Hapmap39274-BTA-49324	1	2	DOM	14/22	123/148	0.4819		1	Hapmap39274-BTA-49324	1	2	REC	2/34	19/252	1
1	ARS-BFGL-NGS-115371	25316771	1	0.2361	0.2952	2	0.3345	0.738		1	ARS-BFGL-NGS-115371	1	2	DOM	15/21	138/133	0.3754		1	ARS-BFGL-NGS-115371	1	2	REC	2/34	22/249	1
1	BTB-00010021	25360826	1	0.1667	0.1328	2	0.4645	1.306		1	BTB-00010021	1	2	DOM	12/24	69/202	0.3188		1	BTB-00010021	1	2	REC	0/36	3/268	1
1	BTA-49319-no-rs	25400262	1	0.2222	0.25	2	0.6647	0.8571		1	BTA-49319-no-rs	1	2	DOM	15/21	116/154	1		1	BTA-49319-no-rs	1	2	REC	1/35	19/251	0.4871
1	BovineHD0100007402	25480755	1	0.4583	0.4885	2	0.7063	0.8858		1	BovineHD0100007402	1	2	DOM	26/10	191/71	1		1	BovineHD0100007402	1	2	REC	7/29	65/197	0.5409
1	Hapmap53715-rs29017639	25482611	2	0.1806	0.1889	1	1	0.9462		1	Hapmap53715-rs29017639	2	1	DOM	13/23	90/180	0.7124		1	Hapmap53715-rs29017639	2	1	REC	0/36	12/258	0.3724
1	BovineHD0100007407	25495578	1	0.4583	0.4846	2	0.7071	0.8999		1	BovineHD0100007407	1	2	DOM	26/10	189/71	1		1	BovineHD0100007407	1	2	REC	7/29	63/197	0.6763
1	BTB-00009762	25511500	1	0.1667	0.1384	2	0.477	1.245		1	BTB-00009762	1	2	DOM	11/25	67/204	0.4239		1	BTB-00009762	1	2	REC	1/35	8/263	1
1	ARS-BFGL-NGS-82685	25550567	2	0.2083	0.2251	1	0.8804	0.906		1	ARS-BFGL-NGS-82685	2	1	DOM	13/23	110/161	0.7181		1	ARS-BFGL-NGS-82685	2	1	REC	2/34	12/259	0.6728
1	BovineHD0100007439	25595556	2	0.4444	0.5	1	0.3827	0.8		1	BovineHD0100007439	2	1	DOM	22/14	200/64	0.06944		1	BovineHD0100007439	2	1	REC	10/26	64/200	0.6811
1	BovineHD0100007449	25626372	1	0.4861	0.4815	2	1	1.019		1	BovineHD0100007449	1	2	DOM	25/11	200/70	0.5505		1	BovineHD0100007449	1	2	REC	10/26	60/210	0.5259
1	BTA-49289-no-rs	25651580	1	0.3889	0.3542	2	0.6015	1.16		1	BTA-49289-no-rs	1	2	DOM	23/13	157/114	0.5901		1	BTA-49289-no-rs	1	2	REC	5/31	35/236	0.7959
1	BovineHD0100007477	25714088	1	0.09722	0.09811	2	1	0.9899		1	BovineHD0100007477	1	2	DOM	7/29	50/215	1		1	BovineHD0100007477	1	2	REC	0/36	2/263	1
1	BovineHD0100046406	25745106	2	0.3889	0.4944	1	0.1029	0.6509		1	BovineHD0100046406	2	1	DOM	22/14	200/66	0.1054		1	BovineHD0100046406	2	1	REC	6/30	63/203	0.4046
1	ARS-BFGL-BAC-13086	25786913	2	0.4861	0.4096	1	0.2525	1.364		1	ARS-BFGL-BAC-13086	2	1	DOM	25/11	176/95	0.71		1	ARS-BFGL-BAC-13086	2	1	REC	10/26	46/225	0.1649
1	ARS-BFGL-NGS-34568	25819185	1	0.1111	0.08672	2	0.5089	1.316		1	ARS-BFGL-NGS-34568	1	2	DOM	8/28	46/225	0.4838		1	ARS-BFGL-NGS-34568	1	2	REC	0/36	1/270	1
1	BovineHD0100007517	25881846	1	0.1111	0.08922	2	0.5167	1.276		1	BovineHD0100007517	1	2	DOM	8/28	47/222	0.491		1	BovineHD0100007517	1	2	REC	0/36	1/268	1
1	BovineHD0100007518	25888342	1	0.3194	0.3467	2	0.6929	0.8843		1	BovineHD0100007518	1	2	DOM	21/15	150/111	1		1	BovineHD0100007518	1	2	REC	2/34	31/230	0.3961
1	BTA-49283-no-rs	25923897	1	0.125	0.1444	2	0.8572	0.8462		1	BTA-49283-no-rs	1	2	DOM	9/27	73/197	1		1	BTA-49283-no-rs	1	2	REC	0/36	5/265	1
1	BovineHD0100007535	25987030	1	0.3611	0.3922	2	0.6997	0.876		1	BovineHD0100007535	1	2	DOM	22/14	166/103	1		1	BovineHD0100007535	1	2	REC	4/32	45/224	0.4764
1	ARS-BFGL-NGS-16145	26001083	2	0.25	0.1907	1	0.2693	1.414		1	ARS-BFGL-NGS-16145	2	1	DOM	15/21	93/177	0.4583		1	ARS-BFGL-NGS-16145	2	1	REC	3/33	10/260	0.187
1	BovineHD0100007541	26026329	1	0.2639	0.3377	2	0.231	0.703		1	BovineHD0100007541	1	2	DOM	17/19	147/118	0.3766		1	BovineHD0100007541	1	2	REC	2/34	32/233	0.3979
1	BTB-00009232	26105452	1	0.09722	0.1052	2	1	0.9163		1	BTB-00009232	1	2	DOM	7/29	54/217	1		1	BTB-00009232	1	2	REC	0/36	3/268	1
1	BovineHD0100007558	26124425	1	0.4306	0.4886	2	0.3805	0.7914		1	BovineHD0100007558	1	2	DOM	25/11	193/70	0.6895		1	BovineHD0100007558	1	2	REC	6/30	64/199	0.4026
1	ARS-BFGL-NGS-20807	26144886	2	0.4583	0.3926	1	0.3068	1.309		1	ARS-BFGL-NGS-20807	2	1	DOM	27/9	172/98	0.1986		1	ARS-BFGL-NGS-20807	2	1	REC	6/30	40/230	0.8039
1	BovineHD0100007577	26169638	2	0.25	0.3086	1	0.341	0.747		1	BovineHD0100007577	2	1	DOM	17/19	139/130	0.7231		1	BovineHD0100007577	2	1	REC	1/35	27/242	0.2227
1	Hapmap26753-BTA-158146	26287535	2	0.2361	0.303	1	0.2728	0.7111		1	Hapmap26753-BTA-158146	2	1	DOM	15/21	133/136	0.4781		1	Hapmap26753-BTA-158146	2	1	REC	2/34	30/239	0.397
1	BovineHD0100007610	26300728	2	0.4028	0.3636	1	0.5178	1.18		1	BovineHD0100007610	2	1	DOM	22/14	163/101	1		1	BovineHD0100007610	2	1	REC	7/29	29/235	0.1682
1	BovineHD0100007618	26336990	2	0.2361	0.2462	1	1	0.9463		1	BovineHD0100007618	2	1	DOM	15/21	115/149	0.8598		1	BovineHD0100007618	2	1	REC	2/34	15/249	1
1	BovineHD0100007641	26411261	2	0.4306	0.3843	1	0.4439	1.211		1	BovineHD0100007641	2	1	DOM	24/12	168/100	0.7153		1	BovineHD0100007641	2	1	REC	7/29	38/230	0.4517
1	BovineHD0100007647	26431102	2	0.2083	0.2472	1	0.5588	0.8013		1	BovineHD0100007647	2	1	DOM	14/22	117/152	0.7205		1	BovineHD0100007647	2	1	REC	1/35	16/253	0.7037
1	BovineHD0100007649	26436860	2	0.25	0.223	1	0.6528	1.161		1	BovineHD0100007649	2	1	DOM	14/22	107/162	1		1	BovineHD0100007649	2	1	REC	4/32	13/256	0.1264
1	BovineHD0100007652	26452516	2	0.3611	0.3233	1	0.5073	1.183		1	BovineHD0100007652	2	1	DOM	21/15	146/120	0.7247		1	BovineHD0100007652	2	1	REC	5/31	26/240	0.3922
1	BovineHD0100007665	26505838	2	0.375	0.3401	1	0.5979	1.164		1	BovineHD0100007665	2	1	DOM	22/14	158/111	0.858		1	BovineHD0100007665	2	1	REC	5/31	25/244	0.3736
1	BovineHD0100007673	26521636	1	0.4861	0.4943	2	0.9008	0.9677		1	BovineHD0100007673	1	2	DOM	24/12	200/64	0.306		1	BovineHD0100007673	1	2	REC	11/25	61/203	0.4046
1	ARS-BFGL-NGS-50954	26559426	1	0.2083	0.2565	2	0.4694	0.763		1	ARS-BFGL-NGS-50954	1	2	DOM	14/22	117/154	0.7209		1	ARS-BFGL-NGS-50954	1	2	REC	1/35	22/249	0.4954
1	BovineHD0100007713	26609580	2	0.4306	0.3989	1	0.6106	1.14		1	BovineHD0100007713	2	1	DOM	25/11	164/98	0.4659		1	BovineHD0100007713	2	1	REC	6/30	45/217	1
1	BovineHD0100007728	26635591	2	0.3472	0.3264	1	0.7893	1.098		1	BovineHD0100007728	2	1	DOM	18/18	145/120	0.5986		1	BovineHD0100007728	2	1	REC	7/29	28/237	0.1598
1	BovineHD0100007746	26681454	2	0.06944	0.07836	1	1	0.8778		1	BovineHD0100007746	2	1	DOM	5/31	40/228	1		1	BovineHD0100007746	2	1	REC	0/36	2/266	1
1	BovineHD0100007786	26776298	1	0.06944	0.08178	2	1	0.8379		1	BovineHD0100007786	1	2	DOM	5/31	43/226	1		1	BovineHD0100007786	1	2	REC	0/36	1/268	1
1	Hapmap50927-BTA-28806	26803778	1	0.08333	0.08303	2	1	1.004		1	Hapmap50927-BTA-28806	1	2	DOM	6/30	44/227	1		1	Hapmap50927-BTA-28806	1	2	REC	0/36	1/270	1
1	BovineHD0100007805	26837703	1	0.3194	0.3282	2	1	0.9606		1	BovineHD0100007805	1	2	DOM	20/16	145/117	1		1	BovineHD0100007805	1	2	REC	3/33	27/235	1
1	BovineHD0100007806	26839277	1	0.08333	0.05894	2	0.4314	1.452		1	BovineHD0100007806	1	2	DOM	5/31	31/232	0.7839		1	BovineHD0100007806	1	2	REC	1/35	0/263	0.1204
1	BovineHD0100007822	26880560	2	0.1806	0.1338	1	0.2791	1.426		1	BovineHD0100007822	2	1	DOM	12/24	69/200	0.3216		1	BovineHD0100007822	2	1	REC	1/35	3/266	0.3965
1	BovineHD0100007825	26884051	1	0.1324	0.1362	2	1	0.9675		1	BovineHD0100007825	1	2	DOM	9/25	71/197	1		1	BovineHD0100007825	1	2	REC	0/34	2/266	1
1	Hapmap59621-rs29013246	26889213	1	0.08333	0.06089	2	0.4413	1.402		1	Hapmap59621-rs29013246	1	2	DOM	5/31	33/238	0.7875		1	Hapmap59621-rs29013246	1	2	REC	1/35	0/271	0.1173
1	ARS-BFGL-NGS-11151	26921328	1	0.4167	0.4317	2	0.8993	0.9402		1	ARS-BFGL-NGS-11151	1	2	DOM	26/10	182/89	0.7046		1	ARS-BFGL-NGS-11151	1	2	REC	4/32	52/219	0.3569
1	BovineHD0100007863	26968734	2	0.1944	0.2398	1	0.4603	0.7653		1	BovineHD0100007863	2	1	DOM	13/23	114/155	0.5898		1	BovineHD0100007863	2	1	REC	1/35	15/254	0.7037
1	BovineHD0100007871	26982720	1	0.06944	0.02974	2	0.08939	2.435		1	BovineHD0100007871	1	2	DOM	5/31	16/253	0.08561		1	BovineHD0100007871	1	2	REC	0/36	0/269	1
1	BovineHD0100007887	27032054	1	0.1111	0.04259	2	0.02085	2.81		1	BovineHD0100007887	1	2	DOM	8/28	23/247	0.01777		1	BovineHD0100007887	1	2	REC	0/36	0/270	1
1	ARS-BFGL-BAC-13744	27106390	2	0.05556	0.05762	1	1	0.962		1	ARS-BFGL-BAC-13744	2	1	DOM	4/32	30/239	1		1	ARS-BFGL-BAC-13744	2	1	REC	0/36	1/268	1
1	BovineHD0100007915	27118086	2	0.1618	0.1393	1	0.5826	1.192		1	BovineHD0100007915	2	1	DOM	9/25	69/193	1		1	BovineHD0100007915	2	1	REC	2/32	4/258	0.1431
1	ARS-BFGL-BAC-5834	27171038	1	0.09722	0.1236	2	0.6995	0.7635		1	ARS-BFGL-BAC-5834	1	2	DOM	7/29	64/207	0.6775		1	ARS-BFGL-BAC-5834	1	2	REC	0/36	3/268	1
1	Hapmap51561-BTA-120459	27239572	1	0.4167	0.3782	2	0.5221	1.174		1	Hapmap51561-BTA-120459	1	2	DOM	22/14	169/102	1		1	Hapmap51561-BTA-120459	1	2	REC	8/28	36/235	0.2011
1	BovineHD0100007956	27267066	2	0.4722	0.487	1	0.9002	0.9425		1	BovineHD0100007956	2	1	DOM	28/8	203/66	0.8389		1	BovineHD0100007956	2	1	REC	6/30	59/210	0.6645
1	BovineHD0100007959	27294161	2	0.09722	0.07993	1	0.6459	1.24		1	BovineHD0100007959	2	1	DOM	7/29	41/228	0.4732		1	BovineHD0100007959	2	1	REC	0/36	2/267	1
1	BovineHD0100007973	27322794	2	0.4861	0.4888	1	1	0.9891		1	BovineHD0100007973	2	1	DOM	28/8	203/66	0.8389		1	BovineHD0100007973	2	1	REC	7/29	60/209	0.8316
1	BovineHD0100007992	27357800	1	0.2639	0.2862	2	0.7812	0.8939		1	BovineHD0100007992	1	2	DOM	17/19	132/137	0.8609		1	BovineHD0100007992	1	2	REC	2/34	22/247	0.7516
1	BovineHD0100007997	27369765	1	0.3	0.2727	2	0.6698	1.143		1	BovineHD0100007997	1	2	DOM	19/16	130/134	0.5945		1	BovineHD0100007997	1	2	REC	2/33	14/250	1
1	BTA-108804-no-rs	27491647	1	0.4583	0.4077	2	0.4457	1.229		1	BTA-108804-no-rs	1	2	DOM	23/13	176/95	1		1	BTA-108804-no-rs	1	2	REC	10/26	45/226	0.1083
1	Hapmap42876-BTA-23541	27602693	1	0.375	0.4465	2	0.2587	0.7438		1	Hapmap42876-BTA-23541	1	2	DOM	19/17	185/86	0.08948		1	Hapmap42876-BTA-23541	1	2	REC	8/28	57/214	0.8305
1	BovineHD0100008084	27634159	1	0.09722	0.07993	2	0.6459	1.24		1	BovineHD0100008084	1	2	DOM	7/29	41/228	0.4732		1	BovineHD0100008084	1	2	REC	0/36	2/267	1
1	BTB-00011225	27706076	2	0.2778	0.2657	1	0.8873	1.063		1	BTB-00011225	2	1	DOM	17/19	126/145	1		1	BTB-00011225	2	1	REC	3/33	18/253	0.723
1	BovineHD0100008157	27829763	2	0.2059	0.2319	1	0.7592	0.8585		1	BovineHD0100008157	2	1	DOM	12/22	110/153	0.5792		1	BovineHD0100008157	2	1	REC	2/32	12/251	0.6668
1	Hapmap50048-BTA-59263	27922359	1	0.3194	0.3339	2	0.8943	0.9362		1	Hapmap50048-BTA-59263	1	2	DOM	17/19	155/116	0.2863		1	Hapmap50048-BTA-59263	1	2	REC	6/30	26/245	0.2393
1	BovineHD0100008201	27988236	2	0.3333	0.3011	1	0.5871	1.16		1	BovineHD0100008201	2	1	DOM	21/15	140/129	0.5944		1	BovineHD0100008201	2	1	REC	3/33	22/247	1
1	BovineHD0100008210	28027702	2	0.3611	0.4331	1	0.2564	0.7399		1	BovineHD0100008210	2	1	DOM	21/15	185/84	0.2552		1	BovineHD0100008210	2	1	REC	5/31	48/221	0.647
1	BovineHD0100008220	28064356	1	0.2639	0.1636	2	0.04654	1.833		1	BovineHD0100008220	1	2	DOM	17/19	75/194	0.02113		1	BovineHD0100008220	1	2	REC	2/34	13/256	0.6931
1	BovineHD0100008239	28153747	1	0.2778	0.1877	2	0.08311	1.664		1	BovineHD0100008239	1	2	DOM	18/18	96/173	0.102		1	BovineHD0100008239	1	2	REC	2/34	5/264	0.1947
1	BovineHD0100008245	28181841	1	0.4028	0.3704	2	0.6058	1.147		1	BovineHD0100008245	1	2	DOM	23/13	172/98	1		1	BovineHD0100008245	1	2	REC	6/30	28/242	0.2607
1	BTB-01285304	28217099	2	0.1806	0.19	1	1	0.9391		1	BTB-01285304	2	1	DOM	12/24	92/179	1		1	BTB-01285304	2	1	REC	1/35	11/260	1
1	BTB-01285382	28243053	2	0.1389	0.06273	1	0.02713	2.41		1	BTB-01285382	2	1	DOM	10/26	32/239	0.01702		1	BTB-01285382	2	1	REC	0/36	2/269	1
1	BTB-01285492	28272873	2	0.1806	0.1218	1	0.1877	1.589		1	BTB-01285492	2	1	DOM	12/24	58/213	0.1372		1	BTB-01285492	2	1	REC	1/35	8/263	1
1	BovineHD0100008286	28320522	1	0.3611	0.4262	2	0.3116	0.761		1	BovineHD0100008286	1	2	DOM	23/13	185/86	0.5758		1	BovineHD0100008286	1	2	REC	3/33	46/225	0.2309
1	BovineHD0100008303	28378968	2	0.1667	0.2007	1	0.6356	0.7963		1	BovineHD0100008303	2	1	DOM	12/24	95/174	0.855		1	BovineHD0100008303	2	1	REC	0/36	13/256	0.377
1	BovineHD0100008315	28408061	1	0.3333	0.2993	2	0.5857	1.171		1	BovineHD0100008315	1	2	DOM	20/16	140/129	0.7254		1	BovineHD0100008315	1	2	REC	4/32	21/248	0.5148
1	BTB-01285832	28434475	1	0.2639	0.2528	2	0.8855	1.06		1	BTB-01285832	1	2	DOM	18/18	121/150	0.5951		1	BTB-01285832	1	2	REC	1/35	16/255	0.7037
1	BTB-01285855	28489054	2	0.125	0.1859	1	0.2521	0.6257		1	BTB-01285855	2	1	DOM	8/28	93/176	0.1864		1	BTB-01285855	2	1	REC	1/35	7/262	1
1	Hapmap59457-rs29010971	28529358	2	0.3194	0.3745	1	0.4354	0.7839		1	Hapmap59457-rs29010971	2	1	DOM	18/18	165/106	0.2779		1	Hapmap59457-rs29010971	2	1	REC	5/31	38/233	1
1	BTB-01285931	28566525	1	0.3194	0.2897	2	0.5847	1.151		1	BTB-01285931	1	2	DOM	21/15	134/137	0.3763		1	BTB-01285931	1	2	REC	2/34	23/248	0.751
1	BTB-01334157	28612680	1	0.4861	0.4594	2	0.7068	1.113		1	BTB-01334157	1	2	DOM	29/7	192/79	0.3226		1	BTB-01334157	1	2	REC	6/30	57/214	0.6633
1	BovineHD0100008371	28628277	1	0.2857	0.2727	2	0.8867	1.067		1	BovineHD0100008371	1	2	DOM	18/17	127/137	0.723		1	BovineHD0100008371	1	2	REC	2/33	17/247	1
1	BovineHD0100008372	28638172	1	0.2	0.2251	2	0.7602	0.8607		1	BovineHD0100008372	1	2	DOM	13/22	109/162	0.8549		1	BovineHD0100008372	1	2	REC	1/34	13/258	1
1	BovineHD0100008394	28741233	1	0.1857	0.2122	2	0.7548	0.8468		1	BovineHD0100008394	1	2	DOM	12/23	104/167	0.7135		1	BovineHD0100008394	1	2	REC	1/34	11/260	1
1	BovineHD0100008409	28792375	2	0.3889	0.3395	1	0.4298	1.238		1	BovineHD0100008409	2	1	DOM	22/14	152/119	0.5965		1	BovineHD0100008409	2	1	REC	6/30	32/239	0.4189
1	ARS-BFGL-BAC-15042	28839476	1	0.2361	0.2657	2	0.6699	0.8543		1	ARS-BFGL-BAC-15042	1	2	DOM	15/21	128/143	0.5957		1	ARS-BFGL-BAC-15042	1	2	REC	2/34	16/255	1
1	BovineHD0100008426	28852017	2	0.5139	0.4723	1	0.5319	1.181		1	BovineHD0100008426	2	1	DOM	29/7	200/71	0.5408		1	BovineHD0100008426	2	1	REC	8/28	56/215	0.8283
1	BovineHD0100008438	28894165	1	0.3143	0.3034	2	0.8903	1.052		1	BovineHD0100008438	1	2	DOM	16/19	138/129	0.5906		1	BovineHD0100008438	1	2	REC	6/29	24/243	0.1357
1	BovineHD0100008449	28939657	1	0.1571	0.1587	2	1	0.9886		1	BovineHD0100008449	1	2	DOM	10/25	81/190	1		1	BovineHD0100008449	1	2	REC	1/34	5/266	0.5206
1	BTB-00012150	29021209	2	0.4583	0.4723	1	0.9002	0.9453		1	BTB-00012150	2	1	DOM	24/12	192/79	0.6979		1	BTB-00012150	2	1	REC	9/27	64/207	0.8367
1	BovineHD0100008468	29027310	2	0.2429	0.1722	1	0.1846	1.542		1	BovineHD0100008468	2	1	DOM	15/20	79/191	0.1198		1	BovineHD0100008468	2	1	REC	2/33	14/256	0.7037
1	BTB-00012128	29047612	2	0.4583	0.428	1	0.7043	1.131		1	BTB-00012128	2	1	DOM	24/12	182/89	1		1	BTB-00012128	2	1	REC	9/27	50/221	0.369
1	ARS-BFGL-BAC-14387	29071379	1	0.4722	0.4779	2	1	0.9776		1	ARS-BFGL-BAC-14387	1	2	DOM	26/10	192/79	1		1	ARS-BFGL-BAC-14387	1	2	REC	8/28	67/204	0.8386
1	ARS-BFGL-NGS-20624	29124102	1	0.1944	0.1107	2	0.05237	1.939		1	ARS-BFGL-NGS-20624	1	2	DOM	13/23	56/215	0.0536		1	ARS-BFGL-NGS-20624	1	2	REC	1/35	4/267	0.4664
1	BovineHD0100008522	29147074	1	0.1286	0.184	2	0.3188	0.6542		1	BovineHD0100008522	1	2	DOM	9/26	92/177	0.3474		1	BovineHD0100008522	1	2	REC	0/35	7/262	1
1	BTB-00011831	29217927	2	0.4143	0.3911	1	0.6991	1.101		1	BTB-00011831	2	1	DOM	22/13	168/103	1		1	BTB-00011831	2	1	REC	7/28	44/227	0.6292
1	BTB-00012396	29239316	2	0.3286	0.4201	1	0.1566	0.6756		1	BTB-00012396	2	1	DOM	19/16	175/94	0.2618		1	BTB-00012396	2	1	REC	4/31	51/218	0.3547
1	BovineHD0100008555	29249975	1	0.2	0.1347	2	0.1468	1.606		1	BovineHD0100008555	1	2	DOM	13/22	67/204	0.1508		1	BovineHD0100008555	1	2	REC	1/34	6/265	0.5765
1	ARS-BFGL-BAC-15059	29316022	1	0.2778	0.2159	2	0.2315	1.397		1	ARS-BFGL-BAC-15059	1	2	DOM	17/19	105/166	0.3668		1	ARS-BFGL-BAC-15059	1	2	REC	3/33	12/259	0.3982
1	ARS-BFGL-NGS-119690	29353509	1	0.3472	0.4096	2	0.3708	0.7667		1	ARS-BFGL-NGS-119690	1	2	DOM	20/16	174/97	0.3588		1	ARS-BFGL-NGS-119690	1	2	REC	5/31	48/223	0.8141
1	ARS-BFGL-BAC-15061	29386594	2	0.3472	0.3963	1	0.4436	0.8103		1	ARS-BFGL-BAC-15061	2	1	DOM	19/17	173/97	0.2023		1	ARS-BFGL-BAC-15061	2	1	REC	6/30	41/229	0.8067
1	BTA-59279-no-rs	29411641	2	0.1389	0.1144	1	0.5583	1.249		1	BTA-59279-no-rs	2	1	DOM	9/27	58/213	0.668		1	BTA-59279-no-rs	2	1	REC	1/35	4/267	0.4664
1	BTB-00012425	29424487	2	0.1806	0.1919	1	1	0.928		1	BTB-00012425	2	1	DOM	12/24	95/176	1		1	BTB-00012425	2	1	REC	1/35	9/262	1
1	BTB-00012448	29451206	1	0.1667	0.2214	2	0.3597	0.7033		1	BTB-00012448	1	2	DOM	11/25	108/163	0.3631		1	BTB-00012448	1	2	REC	1/35	12/259	1
1	BTB-01734642	29520198	2	0.3194	0.31	1	0.8925	1.045		1	BTB-01734642	2	1	DOM	20/16	146/125	0.8611		1	BTB-01734642	2	1	REC	3/33	22/249	1
1	ARS-BFGL-NGS-108911	29541996	1	0.25	0.3155	2	0.2799	0.7232		1	ARS-BFGL-NGS-108911	1	2	DOM	14/22	147/124	0.1093		1	ARS-BFGL-NGS-108911	1	2	REC	4/32	24/247	0.7562
1	ARS-BFGL-NGS-100058	29576850	1	0.4028	0.4	2	1	1.012		1	ARS-BFGL-NGS-100058	1	2	DOM	22/14	177/93	0.5831		1	ARS-BFGL-NGS-100058	1	2	REC	7/29	39/231	0.4562
1	BTB-00012560	29641444	1	0.08333	0.08487	2	1	0.9802		1	BTB-00012560	1	2	DOM	6/30	44/227	1		1	BTB-00012560	1	2	REC	0/36	2/269	1
1	Hapmap40010-BTA-59286	29687411	2	0.4306	0.476	1	0.5303	0.8323		1	Hapmap40010-BTA-59286	2	1	DOM	23/13	198/73	0.2436		1	Hapmap40010-BTA-59286	2	1	REC	8/28	60/211	1
1	BovineHD0100008662	29712048	1	0.2286	0.1519	2	0.1182	1.655		1	BovineHD0100008662	1	2	DOM	15/20	79/191	0.1198		1	BovineHD0100008662	1	2	REC	1/34	3/267	0.3875
1	BTB-00012627	29718126	1	0.3889	0.4296	2	0.5288	0.8448		1	BTB-00012627	1	2	DOM	21/15	181/89	0.3495		1	BTB-00012627	1	2	REC	7/29	51/219	1
1	ARS-BFGL-BAC-11193	29747969	1	0.4722	0.4631	2	0.9005	1.037		1	ARS-BFGL-BAC-11193	1	2	DOM	25/11	194/77	0.8449		1	ARS-BFGL-BAC-11193	1	2	REC	9/27	57/214	0.6656
1	BovineHD0100008680	29773499	1	0.4714	0.4889	2	0.8007	0.9324		1	BovineHD0100008680	1	2	DOM	24/11	202/68	0.4183		1	BovineHD0100008680	1	2	REC	9/26	62/208	0.6762
1	BovineHD0100008695	29835507	2	0.4722	0.4852	1	0.9003	0.9492		1	BovineHD0100008695	2	1	DOM	25/11	202/69	0.5457		1	BovineHD0100008695	2	1	REC	9/27	61/210	0.8325
1	ARS-BFGL-NGS-24142	29859693	2	0.1667	0.1033	1	0.1117	1.736		1	ARS-BFGL-NGS-24142	2	1	DOM	11/25	56/215	0.198		1	ARS-BFGL-NGS-24142	2	1	REC	1/35	0/271	0.1173
1	BovineHD0100008702	29875513	2	0.4714	0.4755	1	1	0.9839		1	BovineHD0100008702	2	1	DOM	24/11	192/73	0.6893		1	BovineHD0100008702	2	1	REC	9/26	60/205	0.6724
1	BovineHD0100008719	29915443	2	0.2429	0.1506	1	0.05702	1.81		1	BovineHD0100008719	2	1	DOM	16/19	76/193	0.04897		1	BovineHD0100008719	2	1	REC	1/34	5/264	0.5231
1	BovineHD0100008729	29938999	1	0.4429	0.4519	2	0.8993	0.9643		1	BovineHD0100008729	1	2	DOM	23/12	188/82	0.6979		1	BovineHD0100008729	1	2	REC	8/27	56/214	0.8255
1	ARS-BFGL-NGS-114084	29944908	2	0.2361	0.1605	1	0.1308	1.617		1	ARS-BFGL-NGS-114084	2	1	DOM	16/20	80/191	0.08487		1	ARS-BFGL-NGS-114084	2	1	REC	1/35	7/264	1
1	ARS-USMARC-Parent-DQ451555-rs29010795	29963400	1	0.4722	0.4834	2	0.9005	0.9562		1	ARS-USMARC-Parent-DQ451555-rs29010795	1	2	DOM	25/11	201/70	0.5495		1	ARS-USMARC-Parent-DQ451555-rs29010795	1	2	REC	9/27	61/210	0.8325
1	BovineHD0100008739	29980510	1	0.3429	0.4026	2	0.365	0.7741		1	BovineHD0100008739	1	2	DOM	19/16	170/97	0.353		1	BovineHD0100008739	1	2	REC	5/30	45/222	0.813
1	BovineHD0100008741	29984913	1	0.1286	0.1338	2	1	0.9549		1	BovineHD0100008741	1	2	DOM	9/26	68/201	1		1	BovineHD0100008741	1	2	REC	0/35	4/265	1
1	BovineHD0100008745	30003117	1	0.3429	0.3783	2	0.6015	0.8575		1	BovineHD0100008745	1	2	DOM	18/17	161/106	0.3617		1	BovineHD0100008745	1	2	REC	6/29	41/226	0.8044
1	BovineHD0100008746	30006137	2	0.4857	0.4926	1	1	0.9727		1	BovineHD0100008746	2	1	DOM	24/11	201/70	0.5416		1	BovineHD0100008746	2	1	REC	10/25	66/205	0.6776
1	BovineHD0100008748	30011802	1	0.3429	0.3858	2	0.5155	0.8307		1	BovineHD0100008748	1	2	DOM	19/16	164/103	0.4636		1	BovineHD0100008748	1	2	REC	5/30	42/225	1
1	BovineHD0100008749	30018380	1	0.2639	0.2889	2	0.7814	0.8824		1	BovineHD0100008749	1	2	DOM	15/21	136/134	0.3769		1	BovineHD0100008749	1	2	REC	4/32	20/250	0.5039
1	ARS-BFGL-NGS-40513	30092167	1	0.3714	0.3672	2	1	1.019		1	ARS-BFGL-NGS-40513	1	2	DOM	21/14	159/112	1		1	ARS-BFGL-NGS-40513	1	2	REC	5/30	40/231	1
1	BovineHD0100008775	30113163	1	0.2083	0.1328	2	0.1036	1.718		1	BovineHD0100008775	1	2	DOM	14/22	67/204	0.1053		1	BovineHD0100008775	1	2	REC	1/35	5/266	0.53
1	BovineHD0100008800	30232831	2	0.3429	0.4015	1	0.3659	0.7778		1	BovineHD0100008800	2	1	DOM	22/13	171/98	1		1	BovineHD0100008800	2	1	REC	2/33	45/224	0.1326
1	BTA-59299-no-rs	30241742	1	0.3194	0.2565	2	0.2572	1.361		1	BTA-59299-no-rs	1	2	DOM	19/17	122/149	0.4769		1	BTA-59299-no-rs	1	2	REC	4/32	17/254	0.2877
1	BTA-59305-no-rs	30323359	2	0.1143	0.1171	1	1	0.9729		1	BTA-59305-no-rs	2	1	DOM	7/28	59/210	1		1	BTA-59305-no-rs	2	1	REC	1/34	4/265	0.4598
1	BovineHD0100008840	30392152	2	0.2429	0.1852	1	0.2595	1.411		1	BovineHD0100008840	2	1	DOM	15/20	90/180	0.2638		1	BovineHD0100008840	2	1	REC	2/33	10/260	0.6351
1	ARS-BFGL-BAC-7369	30418294	2	0.02778	0.02399	1	0.6922	1.163		1	ARS-BFGL-BAC-7369	2	1	DOM	2/34	12/259	0.6728		1	ARS-BFGL-BAC-7369	2	1	REC	0/36	1/270	1
1	ARS-BFGL-NGS-14285	30449967	2	0.1944	0.1624	1	0.5009	1.245		1	ARS-BFGL-NGS-14285	2	1	DOM	12/24	81/190	0.7011		1	ARS-BFGL-NGS-14285	2	1	REC	2/34	7/264	0.2851
1	BTB-01490065	30659162	1	0.09722	0.08704	2	0.8242	1.13		1	BTB-01490065	1	2	DOM	7/29	44/226	0.6356		1	BTB-01490065	1	2	REC	0/36	3/267	1
1	ARS-BFGL-NGS-73149	30694694	2	0.1944	0.1444	1	0.2912	1.43		1	ARS-BFGL-NGS-73149	2	1	DOM	11/25	74/196	0.6947		1	ARS-BFGL-NGS-73149	2	1	REC	3/33	4/266	0.03765
1	BovineHD0100008921	30743768	2	0.2	0.1798	1	0.7416	1.141		1	BovineHD0100008921	2	1	DOM	12/23	87/180	0.8496		1	BovineHD0100008921	2	1	REC	2/33	9/258	0.3712
1	BovineHD0100008923	30746202	2	0.2	0.1798	1	0.7416	1.141		1	BovineHD0100008923	2	1	DOM	12/23	87/180	0.8496		1	BovineHD0100008923	2	1	REC	2/33	9/258	0.3712
1	BovineHD0100008924	30746814	1	0.2	0.1798	2	0.7416	1.141		1	BovineHD0100008924	1	2	DOM	12/23	87/180	0.8496		1	BovineHD0100008924	1	2	REC	2/33	9/258	0.3712
1	BovineHD0100008927	30750780	2	0.2	0.1798	1	0.7416	1.141		1	BovineHD0100008927	2	1	DOM	12/23	87/180	0.8496		1	BovineHD0100008927	2	1	REC	2/33	9/258	0.3712
1	BovineHD0100008928	30751532	1	0.2	0.1798	2	0.7416	1.141		1	BovineHD0100008928	1	2	DOM	12/23	87/180	0.8496		1	BovineHD0100008928	1	2	REC	2/33	9/258	0.3712
1	BovineHD0100008930	30755257	1	0.2	0.1798	2	0.7416	1.141		1	BovineHD0100008930	1	2	DOM	12/23	87/180	0.8496		1	BovineHD0100008930	1	2	REC	2/33	9/258	0.3712
1	BTA-97531-no-rs	30759148	1	0.2083	0.1827	2	0.6285	1.178		1	BTA-97531-no-rs	1	2	DOM	13/23	90/181	0.7115		1	BTA-97531-no-rs	1	2	REC	2/34	9/262	0.6245
1	BovineHD0100008936	30780515	1	0.05714	0.07037	2	1	0.8006		1	BovineHD0100008936	1	2	DOM	4/31	37/233	1		1	BovineHD0100008936	1	2	REC	0/35	1/269	1
1	BTB-01490270	30840833	2	0.375	0.4225	1	0.525	0.8201		1	BTB-01490270	2	1	DOM	23/13	180/91	0.8516		1	BTB-01490270	2	1	REC	4/32	49/222	0.3571
1	BovineHD0100008950	30893510	2	0.1714	0.2323	1	0.2892	0.6836		1	BovineHD0100008950	2	1	DOM	11/24	114/155	0.2737		1	BovineHD0100008950	2	1	REC	1/34	11/258	1
1	BTA-18114-no-rs	30972284	1	0.08333	0.04244	2	0.1359	2.051		1	BTA-18114-no-rs	1	2	DOM	6/30	21/250	0.1083		1	BTA-18114-no-rs	1	2	REC	0/36	2/269	1
1	ARS-BFGL-NGS-40158	30999614	2	0.1528	0.1328	1	0.5869	1.177		1	ARS-BFGL-NGS-40158	2	1	DOM	9/27	67/204	1		1	ARS-BFGL-NGS-40158	2	1	REC	2/34	5/266	0.1927
1	ARS-BFGL-BAC-11830	31035369	2	0.09722	0.09779	1	1	0.9936		1	ARS-BFGL-BAC-11830	2	1	DOM	6/30	51/220	1		1	ARS-BFGL-BAC-11830	2	1	REC	1/35	2/269	0.313
1	BTB-01303393	31082779	1	0.25	0.2177	2	0.5467	1.198		1	BTB-01303393	1	2	DOM	16/20	107/164	0.5906		1	BTB-01303393	1	2	REC	2/34	11/260	0.6551
1	BTB-01303334	31129370	2	0.09722	0.1019	1	1	0.9497		1	BTB-01303334	2	1	DOM	6/30	52/218	0.8237		1	BTB-01303334	2	1	REC	1/35	3/267	0.3955
1	BTA-87372-no-rs	31151496	1	0.4306	0.4834	2	0.4517	0.808		1	BTA-87372-no-rs	1	2	DOM	24/12	198/73	0.4314		1	BTA-87372-no-rs	1	2	REC	7/29	64/207	0.6775
1	BTA-41946-no-rs	31171747	1	0.2083	0.2823	2	0.2074	0.6691		1	BTA-41946-no-rs	1	2	DOM	12/24	132/139	0.109		1	BTA-41946-no-rs	1	2	REC	3/33	21/250	0.7513
1	Hapmap32039-BTA-131798	31250241	1	0.04167	0.06089	2	0.7883	0.6706		1	Hapmap32039-BTA-131798	1	2	DOM	3/33	33/238	0.7819		1	Hapmap32039-BTA-131798	1	2	REC	0/36	0/271	1
1	BovineHD0100009052	31270891	1	0.1571	0.1537	2	1	1.027		1	BovineHD0100009052	1	2	DOM	10/25	77/193	1		1	BovineHD0100009052	1	2	REC	1/34	6/264	0.5778
1	Hapmap50687-BTA-41950	31302244	1	0.1111	0.07749	2	0.356	1.488		1	Hapmap50687-BTA-41950	1	2	DOM	8/28	41/230	0.3301		1	Hapmap50687-BTA-41950	1	2	REC	0/36	1/270	1
1	BTB-00013894	31424587	2	0.04167	0.05904	1	0.7868	0.6929		1	BTB-00013894	2	1	DOM	3/33	32/239	0.7803		1	BTB-00013894	2	1	REC	0/36	0/271	1
1	ARS-BFGL-NGS-97949	31450731	2	0.05556	0.03321	1	0.3122	1.712		1	ARS-BFGL-NGS-97949	2	1	DOM	4/32	16/255	0.271		1	ARS-BFGL-NGS-97949	2	1	REC	0/36	2/269	1
1	BovineHD0100009129	31557192	1	0.2571	0.2722	2	0.8866	0.9254		1	BovineHD0100009129	1	2	DOM	16/19	129/141	0.8588		1	BovineHD0100009129	1	2	REC	2/33	18/252	1
1	BTA-110980-no-rs	31606418	1	0.3889	0.4539	2	0.3152	0.7657		1	BTA-110980-no-rs	1	2	DOM	23/13	186/85	0.572		1	BTA-110980-no-rs	1	2	REC	5/31	60/211	0.384
1	BTB-01653833	31639548	2	0.4583	0.4742	1	0.9001	0.9383		1	BTB-01653833	2	1	DOM	27/9	198/73	1		1	BTB-01653833	2	1	REC	6/30	59/212	0.664
1	BTB-01653794	31672750	1	0.3333	0.3506	2	0.8954	0.9263		1	BTB-01653794	1	2	DOM	22/14	160/111	0.8585		1	BTB-01653794	1	2	REC	2/34	30/241	0.3976
1	BTB-01335754	31699827	2	0.2083	0.1605	1	0.3129	1.376		1	BTB-01335754	2	1	DOM	14/22	83/188	0.3423		1	BTB-01335754	2	1	REC	1/35	4/267	0.4664
1	BTB-01335860	31755884	1	0.1389	0.1033	2	0.4157	1.4		1	BTB-01335860	1	2	DOM	9/27	55/216	0.5155		1	BTB-01335860	1	2	REC	1/35	1/270	0.2211
1	BovineHD0100009190	31915959	2	0.2143	0.2111	1	1	1.019		1	BovineHD0100009190	2	1	DOM	12/23	103/167	0.7141		1	BovineHD0100009190	2	1	REC	3/32	11/259	0.2083
1	BovineHD0100009210	32073771	2	0.3286	0.3843	1	0.432	0.7839		1	BovineHD0100009210	2	1	DOM	19/16	164/104	0.4652		1	BovineHD0100009210	2	1	REC	4/31	42/226	0.6235
1	BTB-01843131	32091115	1	0.2639	0.2122	2	0.3617	1.331		1	BTB-01843131	1	2	DOM	17/19	104/167	0.3647		1	BTB-01843131	1	2	REC	2/34	11/260	0.6551
1	ARS-BFGL-NGS-80747	32132657	2	0.3056	0.2454	1	0.3117	1.353		1	ARS-BFGL-NGS-80747	2	1	DOM	19/17	117/154	0.2893		1	ARS-BFGL-NGS-80747	2	1	REC	3/33	16/255	0.4759
1	BTB-01955576	32247439	2	0.2083	0.179	1	0.5193	1.207		1	BTB-01955576	2	1	DOM	12/24	87/184	0.852		1	BTB-01955576	2	1	REC	3/33	10/261	0.1857
1	BTB-01755357	32304105	2	0.3333	0.3672	1	0.6045	0.8618		1	BTB-01755357	2	1	DOM	19/17	163/108	0.4708		1	BTB-01755357	2	1	REC	5/31	36/235	1
1	BTB-02018681	32357222	1	0.25	0.1766	2	0.1459	1.554		1	BTB-02018681	1	2	DOM	15/21	84/185	0.2552		1	BTB-02018681	1	2	REC	3/33	11/258	0.2209
1	BTB-00014284	32424393	2	0.1944	0.2122	1	0.8777	0.8963		1	BTB-00014284	2	1	DOM	14/22	105/166	1		1	BTB-00014284	2	1	REC	0/36	10/261	0.613
1	BTB-00014368	32511532	1	0.25	0.1716	2	0.1057	1.609		1	BTB-00014368	1	2	DOM	15/21	82/189	0.1837		1	BTB-00014368	1	2	REC	3/33	11/260	0.2179
1	BTB-00014500	32640244	1	0.375	0.2897	2	0.1703	1.471		1	BTB-00014500	1	2	DOM	22/14	134/137	0.2164		1	BTB-00014500	1	2	REC	5/31	23/248	0.3491
1	BTB-00014527	32683856	2	0.125	0.1208	1	0.8494	1.04		1	BTB-00014527	2	1	DOM	9/27	60/209	0.6766		1	BTB-00014527	2	1	REC	0/36	5/264	1
1	Hapmap38175-BTA-69177	32741957	1	0.4167	0.428	2	0.8995	0.9544		1	Hapmap38175-BTA-69177	1	2	DOM	26/10	186/85	0.7065		1	Hapmap38175-BTA-69177	1	2	REC	4/32	46/225	0.4758
1	BovineHD0100009346	32866434	1	0.5143	0.4963	2	0.8005	1.075		1	BovineHD0100009346	1	2	DOM	28/7	202/68	0.6766		1	BovineHD0100009346	1	2	REC	8/27	66/204	1
1	BTB-00014850	32943411	1	0.1528	0.1611	2	1	0.9389		1	BTB-00014850	1	2	DOM	11/25	79/191	0.8479		1	BTB-00014850	1	2	REC	0/36	8/262	0.6026
1	BTB-00014929	32993823	2	0.1944	0.1661	1	0.5083	1.212		1	BTB-00014929	2	1	DOM	13/23	79/192	0.4394		1	BTB-00014929	2	1	REC	1/35	11/260	1
1	BTA-69182-no-rs	33076473	2	0.1667	0.2657	1	0.08328	0.5528		1	BTA-69182-no-rs	2	1	DOM	10/26	124/147	0.04901		1	BTA-69182-no-rs	2	1	REC	2/34	20/251	1
1	BTB-00015164	33136647	1	0.375	0.369	2	1	1.026		1	BTB-00015164	1	2	DOM	23/13	163/108	0.7196		1	BTB-00015164	1	2	REC	4/32	37/234	0.7994
1	Hapmap58994-rs29021251	33175064	1	0.05556	0.04982	2	0.7753	1.122		1	Hapmap58994-rs29021251	1	2	DOM	4/32	25/246	0.7602		1	Hapmap58994-rs29021251	1	2	REC	0/36	2/269	1
1	BovineHD0100009448	33218979	1	0.375	0.4685	2	0.1657	0.6806		1	BovineHD0100009448	1	2	DOM	22/14	199/71	0.1174		1	BovineHD0100009448	1	2	REC	5/31	54/216	0.5019
1	BTB-00016647	33342088	1	0.2917	0.4336	2	0.02231	0.5379		1	BTB-00016647	1	2	DOM	19/17	184/87	0.09097		1	BTB-00016647	1	2	REC	2/34	51/220	0.05835
1	BTA-69212-no-rs	33398878	1	0.3472	0.3911	2	0.5208	0.828		1	BTA-69212-no-rs	1	2	DOM	21/15	176/95	0.4624		1	BTA-69212-no-rs	1	2	REC	4/32	36/235	1
1	BovineHD0100009494	33426743	1	0.3472	0.3358	2	0.8946	1.052		1	BovineHD0100009494	1	2	DOM	21/15	150/121	0.8586		1	BovineHD0100009494	1	2	REC	4/32	32/239	1
1	BovineHD0100009515	33496557	1	0.2778	0.2426	2	0.5605	1.201		1	BovineHD0100009515	1	2	DOM	16/20	116/154	0.8601		1	BovineHD0100009515	1	2	REC	4/32	15/255	0.2574
1	Hapmap48855-BTA-69221	33560583	2	0.2778	0.2472	1	0.5651	1.171		1	Hapmap48855-BTA-69221	2	1	DOM	18/18	118/153	0.4802		1	Hapmap48855-BTA-69221	2	1	REC	2/34	16/255	1
1	BovineHD0100009559	33607347	1	0.5417	0.4352	2	0.101	1.534		1	BovineHD0100009559	1	2	DOM	27/9	184/86	0.4495		1	BovineHD0100009559	1	2	REC	12/24	51/219	0.05051
1	BTA-69226-no-rs	33610831	1	0.4306	0.4004	2	0.7016	1.132		1	BTA-69226-no-rs	1	2	DOM	25/11	173/98	0.5811		1	BTA-69226-no-rs	1	2	REC	6/30	44/227	1
1	BovineHD0100009570	33634151	1	0.4167	0.4407	2	0.8005	0.9064		1	BovineHD0100009570	1	2	DOM	25/11	181/89	0.8516		1	BovineHD0100009570	1	2	REC	5/31	57/213	0.3825
1	BovineHD0100009592	33688529	2	0.1389	0.2019	1	0.2665	0.6378		1	BovineHD0100009592	2	1	DOM	10/26	99/171	0.3563		1	BovineHD0100009592	2	1	REC	0/36	10/260	0.6133
1	BTB-00902072	33805826	1	0.1389	0.1259	2	0.7092	1.12		1	BTB-00902072	1	2	DOM	10/26	63/207	0.5379		1	BTB-00902072	1	2	REC	0/36	5/265	1
1	BovineHD0100009633	33826972	2	0.4028	0.4906	1	0.1691	0.7002		1	BovineHD0100009633	2	1	DOM	26/10	199/68	0.8392		1	BovineHD0100009633	2	1	REC	3/33	63/204	0.05041
1	BovineHD0100009652	33903021	2	0.5286	0.4815	1	0.5255	1.207		1	BovineHD0100009652	2	1	DOM	27/8	196/74	0.687		1	BovineHD0100009652	2	1	REC	10/25	64/206	0.5328
1	ARS-BFGL-NGS-45064	33916347	2	0.5	0.4428	1	0.3793	1.258		1	ARS-BFGL-NGS-45064	2	1	DOM	27/9	186/85	0.5642		1	ARS-BFGL-NGS-45064	2	1	REC	9/27	54/217	0.5106
1	BovineHD0100009664	33935558	1	0.4444	0.4336	2	0.8996	1.045		1	BovineHD0100009664	1	2	DOM	22/14	185/86	0.4495		1	BovineHD0100009664	1	2	REC	10/26	50/221	0.1851
1	Hapmap43403-BTA-91448	33964232	2	0.2361	0.2768	1	0.573	0.8078		1	Hapmap43403-BTA-91448	2	1	DOM	13/23	130/141	0.2145		1	Hapmap43403-BTA-91448	2	1	REC	4/32	20/251	0.5032
1	BTB-01419032	33988612	2	0.125	0.09888	1	0.5322	1.302		1	BTB-01419032	2	1	DOM	8/28	51/217	0.6553		1	BTB-01419032	2	1	REC	1/35	2/266	0.3158
1	BovineHD0100009674	33992020	1	0.4583	0.487	2	0.707	0.8912		1	BovineHD0100009674	1	2	DOM	26/10	200/70	0.8407		1	BovineHD0100009674	1	2	REC	7/29	63/207	0.6783
1	BTA-91456-no-rs	34021093	2	0.1528	0.0941	1	0.1423	1.736		1	BTA-91456-no-rs	2	1	DOM	10/26	51/220	0.2641		1	BTA-91456-no-rs	2	1	REC	1/35	0/271	0.1173
1	Hapmap34824-BES10_Contig592_452	34068395	1	0.3611	0.3727	2	0.8972	0.9514		1	Hapmap34824-BES10_Contig592_452	1	2	DOM	22/14	167/104	1		1	Hapmap34824-BES10_Contig592_452	1	2	REC	4/32	35/236	1
1	BovineHD0100009723	34158319	1	0.2083	0.1648	2	0.4026	1.334		1	BovineHD0100009723	1	2	DOM	14/22	81/189	0.3374		1	BovineHD0100009723	1	2	REC	1/35	8/262	1
1	BTB-00929993	34231964	2	0.06944	0.04428	1	0.3692	1.611		1	BTB-00929993	2	1	DOM	5/31	24/247	0.3592		1	BTB-00929993	2	1	REC	0/36	0/271	1
1	Hapmap55373-rs29027574	34360152	1	0.3472	0.3376	2	0.8949	1.043		1	Hapmap55373-rs29027574	1	2	DOM	19/17	157/114	0.5933		1	Hapmap55373-rs29027574	1	2	REC	6/30	26/245	0.2393
1	BTB-00930093	34400126	2	0.08333	0.1107	1	0.6845	0.7303		1	BTB-00930093	2	1	DOM	5/31	59/212	0.3824		1	BTB-00930093	2	1	REC	1/35	1/270	0.2211
1	BTB-00930215	34424718	1	0.4444	0.3542	2	0.152	1.458		1	BTB-00930215	1	2	DOM	26/10	159/112	0.1474		1	BTB-00930215	1	2	REC	6/30	33/238	0.4285
1	BTB-00930351	34458042	2	0.04167	0.09041	1	0.2562	0.4374		1	BTB-00930351	2	1	DOM	3/33	49/222	0.1636		1	BTB-00930351	2	1	REC	0/36	0/271	1
1	Hapmap49364-BTA-89353	34500276	2	0.25	0.3339	1	0.1804	0.6648		1	Hapmap49364-BTA-89353	2	1	DOM	17/19	149/122	0.4769		1	Hapmap49364-BTA-89353	2	1	REC	1/35	32/239	0.1488
1	BTB-01965833	34602877	1	0.4444	0.4649	2	0.8018	0.9206		1	BTB-01965833	1	2	DOM	25/11	193/78	0.846		1	BTB-01965833	1	2	REC	7/29	59/212	0.8325
1	BTB-01965810	34624045	2	0.1528	0.1144	1	0.3349	1.396		1	BTB-01965810	2	1	DOM	11/25	56/215	0.198		1	BTB-01965810	2	1	REC	0/36	6/265	1
1	BovineHD0100009808	34629115	1	0.4861	0.4889	2	1	0.9889		1	BovineHD0100009808	1	2	DOM	26/10	188/82	0.8479		1	BovineHD0100009808	1	2	REC	9/27	76/194	0.8434
1	BovineHD0100009809	34638715	1	0.3286	0.3801	2	0.4331	0.7979		1	BovineHD0100009809	1	2	DOM	18/17	159/108	0.3677		1	BovineHD0100009809	1	2	REC	5/30	44/223	1
1	Hapmap43629-BTA-60810	34663026	1	0.4028	0.4981	2	0.134	0.6794		1	Hapmap43629-BTA-60810	1	2	DOM	23/13	194/76	0.3328		1	Hapmap43629-BTA-60810	1	2	REC	6/30	75/195	0.2264
1	BTB-01211075	34723604	2	0.2361	0.3444	1	0.08263	0.5883		1	BTB-01211075	2	1	DOM	16/20	147/123	0.2888		1	BTB-01211075	2	1	REC	1/35	39/231	0.06249
1	Hapmap47907-BTA-29493	34756687	1	0.06944	0.06273	2	0.7971	1.115		1	Hapmap47907-BTA-29493	1	2	DOM	5/31	34/237	0.7914		1	Hapmap47907-BTA-29493	1	2	REC	0/36	0/271	1
1	Hapmap43823-BTA-27227	34779787	2	0.4028	0.4649	1	0.3784	0.7761		1	Hapmap43823-BTA-27227	2	1	DOM	24/12	193/78	0.5639		1	Hapmap43823-BTA-27227	2	1	REC	5/31	59/212	0.3824
1	BTB-01890914	34803049	2	0.25	0.2638	1	0.887	0.9301		1	BTB-01890914	2	1	DOM	18/18	125/146	0.7235		1	BTB-01890914	2	1	REC	0/36	18/253	0.1448
1	UA-IFASA-4161	34824930	2	0.4028	0.4613	1	0.3795	0.7877		1	UA-IFASA-4161	2	1	DOM	24/12	191/80	0.6992		1	UA-IFASA-4161	2	1	REC	5/31	59/212	0.3824
1	BTB-01210899	34866883	2	0.1389	0.07963	1	0.1148	1.864		1	BTB-01210899	2	1	DOM	10/26	40/230	0.05655		1	BTB-01210899	2	1	REC	0/36	3/267	1
1	ARS-BFGL-BAC-12481	34908448	1	0.3611	0.3339	2	0.691	1.127		1	ARS-BFGL-BAC-12481	1	2	DOM	22/14	143/128	0.3781		1	ARS-BFGL-BAC-12481	1	2	REC	4/32	38/233	0.7989
1	BovineHD0100009896	34918486	2	0.1806	0.1124	1	0.1201	1.741		1	BovineHD0100009896	2	1	DOM	12/24	56/211	0.1338		1	BovineHD0100009896	2	1	REC	1/35	4/263	0.4711
1	BovineHD0100009902	34927781	2	0.06944	0.04815	1	0.3953	1.475		1	BovineHD0100009902	2	1	DOM	5/31	25/245	0.3724		1	BovineHD0100009902	2	1	REC	0/36	1/269	1
1	BTB-00017000	34931862	2	0.3611	0.2897	1	0.2191	1.386		1	BTB-00017000	2	1	DOM	20/16	135/136	0.5958		1	BTB-00017000	2	1	REC	6/30	22/249	0.1174
1	Hapmap43052-BTA-79184	34954810	1	0.2083	0.1513	2	0.2284	1.476		1	Hapmap43052-BTA-79184	1	2	DOM	14/22	75/196	0.1743		1	Hapmap43052-BTA-79184	1	2	REC	1/35	7/264	1
1	BTA-79188-no-rs	34978818	2	0.06944	0.03889	1	0.2159	1.844		1	BTA-79188-no-rs	2	1	DOM	5/31	21/249	0.2088		1	BTA-79188-no-rs	2	1	REC	0/36	0/270	1
1	BTA-111131-no-rs	35000632	2	0.5417	0.4059	1	0.03115	1.73		1	BTA-111131-no-rs	2	1	DOM	27/9	179/92	0.3471		1	BTA-111131-no-rs	2	1	REC	12/24	41/230	0.01627
1	BovineHD0100009933	35043254	2	0.4857	0.395	1	0.1556	1.446		1	BovineHD0100009933	2	1	DOM	27/8	166/96	0.1321		1	BovineHD0100009933	2	1	REC	7/28	41/221	0.4716
1	BTB-01210806	35050813	1	0.5	0.3911	2	0.09605	1.557		1	BTB-01210806	1	2	DOM	28/8	171/100	0.09591		1	BTB-01210806	1	2	REC	8/28	41/230	0.3301
1	BovineHD0100009941	35065680	1	0.4571	0.374	2	0.192	1.409		1	BovineHD0100009941	1	2	DOM	25/10	157/105	0.2025		1	BovineHD0100009941	1	2	REC	7/28	39/223	0.4556
1	BovineHD0100009943	35076740	1	0.4857	0.3664	2	0.06603	1.633		1	BovineHD0100009943	1	2	DOM	27/8	154/108	0.04238		1	BovineHD0100009943	1	2	REC	7/28	38/224	0.4496
1	BovineHD0100009944	35081085	1	0.4571	0.3664	2	0.1501	1.456		1	BovineHD0100009944	1	2	DOM	25/10	154/108	0.1978		1	BovineHD0100009944	1	2	REC	7/28	38/224	0.4496
1	BovineHD0100009945	35082343	1	0.4722	0.3611	2	0.07076	1.583		1	BovineHD0100009945	1	2	DOM	26/10	157/113	0.1469		1	BovineHD0100009945	1	2	REC	8/28	38/232	0.2147
1	BovineHD0100009950	35109384	1	0.5972	0.4679	2	0.04441	1.686		1	BovineHD0100009950	1	2	DOM	31/5	192/73	0.1038		1	BovineHD0100009950	1	2	REC	12/24	56/209	0.1348
1	BovineHD0100009954	35124823	2	0.5833	0.4777	1	0.1032	1.531		1	BovineHD0100009954	2	1	DOM	31/5	197/72	0.1055		1	BovineHD0100009954	2	1	REC	11/25	60/209	0.2949
1	BTA-111133-no-rs	35149839	1	0.375	0.3819	2	1	0.971		1	BTA-111133-no-rs	1	2	DOM	22/14	166/105	1		1	BTA-111133-no-rs	1	2	REC	5/31	41/230	1
1	BovineHD0100009976	35197382	2	0.1618	0.1604	1	1	1.01		1	BovineHD0100009976	2	1	DOM	10/24	84/181	0.847		1	BovineHD0100009976	2	1	REC	1/33	1/264	0.2148
1	ARS-BFGL-NGS-100434	35277715	1	0.2083	0.1882	2	0.6358	1.135		1	ARS-BFGL-NGS-100434	1	2	DOM	14/22	98/173	0.854		1	ARS-BFGL-NGS-100434	1	2	REC	1/35	4/267	0.4664
1	BovineHD0100010000	35292924	1	0.4571	0.4532	2	1	1.016		1	BovineHD0100010000	1	2	DOM	25/10	188/79	1		1	BovineHD0100010000	1	2	REC	7/28	54/213	1
1	BovineHD0100010002	35301764	1	0.2	0.2185	2	0.8774	0.8941		1	BovineHD0100010002	1	2	DOM	14/21	110/160	1		1	BovineHD0100010002	1	2	REC	0/35	8/262	0.6033
1	BovineHD0100010009	35343945	1	0.375	0.3327	2	0.5078	1.203		1	BovineHD0100010009	1	2	DOM	18/18	146/123	0.7225		1	BovineHD0100010009	1	2	REC	9/27	33/236	0.06618
1	BTB-00016701	35345339	2	0.3611	0.428	1	0.3106	0.7552		1	BTB-00016701	2	1	DOM	20/16	185/86	0.1356		1	BTB-00016701	2	1	REC	6/30	47/224	1
1	BovineHD0100010010	35346762	1	0.4286	0.4981	2	0.3093	0.7557		1	BovineHD0100010010	1	2	DOM	22/13	197/65	0.151		1	BovineHD0100010010	1	2	REC	8/27	64/198	1
1	BovineHD0100010011	35347543	2	0.4286	0.4943	1	0.3116	0.7674		1	BovineHD0100010011	2	1	DOM	22/13	196/66	0.1542		1	BovineHD0100010011	2	1	REC	8/27	63/199	1
1	BovineHD0100010012	35348417	1	0.4286	0.4943	2	0.3118	0.7672		1	BovineHD0100010012	1	2	DOM	22/13	198/67	0.1553		1	BovineHD0100010012	1	2	REC	8/27	64/201	1
1	BovineHD0100010019	35371662	2	0.1389	0.09815	1	0.3008	1.482		1	BovineHD0100010019	2	1	DOM	9/27	50/220	0.37		1	BovineHD0100010019	2	1	REC	1/35	3/267	0.3955
1	BovineHD0100010029	35401745	1	0.4861	0.3981	2	0.162	1.43		1	BovineHD0100010029	1	2	DOM	27/9	174/96	0.2632		1	BovineHD0100010029	1	2	REC	8/28	41/229	0.3308
1	DPI-55	35424977	1	0.1806	0.1389	2	0.3705	1.366		1	DPI-55	1	2	DOM	12/24	70/200	0.4226		1	DPI-55	1	2	REC	1/35	5/265	0.5312
1	BovineHD0100010042	35440283	1	0.4861	0.4033	2	0.2029	1.399		1	BovineHD0100010042	1	2	DOM	27/9	176/93	0.3468		1	BovineHD0100010042	1	2	REC	8/28	41/228	0.3315
1	BovineHD0100010051	35462050	1	0.3333	0.3123	2	0.7871	1.101		1	BovineHD0100010051	1	2	DOM	19/17	137/132	0.8609		1	BovineHD0100010051	1	2	REC	5/31	31/238	0.5928
1	BovineHD0100010072	35546605	2	0.4028	0.3611	1	0.5161	1.193		1	BovineHD0100010072	2	1	DOM	25/11	163/107	0.3632		1	BovineHD0100010072	2	1	REC	4/32	32/238	1
1	Hapmap32018-BTA-123851	35567873	2	0.2083	0.1716	1	0.4148	1.271		1	Hapmap32018-BTA-123851	2	1	DOM	13/23	82/189	0.565		1	Hapmap32018-BTA-123851	2	1	REC	2/34	11/260	0.6551
1	BovineHD0100010132	35686183	1	0.2361	0.2389	2	1	0.9848		1	BovineHD0100010132	1	2	DOM	15/21	110/160	1		1	BovineHD0100010132	1	2	REC	2/34	19/251	1
1	BTB-00016898	35722253	2	0.125	0.1033	1	0.5433	1.24		1	BTB-00016898	2	1	DOM	9/27	54/217	0.5106		1	BTB-00016898	2	1	REC	0/36	2/269	1
1	BTB-00016906	35774336	2	0.2778	0.179	1	0.05467	1.764		1	BTB-00016906	2	1	DOM	19/17	91/180	0.02744		1	BTB-00016906	2	1	REC	1/35	6/265	0.5862
1	ARS-BFGL-NGS-60721	35809354	1	0.1528	0.2159	2	0.2792	0.655		1	ARS-BFGL-NGS-60721	1	2	DOM	10/26	101/170	0.356		1	ARS-BFGL-NGS-60721	1	2	REC	1/35	16/255	0.7037
1	BovineHD0100010183	35833095	1	0.2941	0.283	2	0.8866	1.056		1	BovineHD0100010183	1	2	DOM	19/15	122/143	0.3618		1	BovineHD0100010183	1	2	REC	1/33	28/237	0.2225
1	BovineHD0100010199	35884896	1	0.3333	0.2759	2	0.3302	1.312		1	BovineHD0100010199	1	2	DOM	21/15	124/146	0.2132		1	BovineHD0100010199	1	2	REC	3/33	25/245	1
1	BovineHD0100010213	35933171	1	0.3472	0.2695	2	0.2072	1.442		1	BovineHD0100010213	1	2	DOM	21/15	121/148	0.1556		1	BovineHD0100010213	1	2	REC	4/32	24/245	0.7568
1	BovineHD0100010229	35976438	2	0.2917	0.2602	1	0.5708	1.171		1	BovineHD0100010229	2	1	DOM	19/17	118/151	0.3732		1	BovineHD0100010229	2	1	REC	2/34	22/247	0.7516
1	DPI-2	36007508	2	0.08333	0.1476	1	0.2036	0.525		1	DPI-2	2	1	DOM	6/30	72/199	0.2278		1	DPI-2	2	1	REC	0/36	8/263	0.6027
1	BovineHD0100010243	36026109	1	0.4028	0.4317	2	0.7044	0.8877		1	BovineHD0100010243	1	2	DOM	22/14	186/85	0.4478		1	BovineHD0100010243	1	2	REC	7/29	48/223	0.8176
1	BTB-00017157	36215840	2	0.06944	0.1439	1	0.0981	0.4439		1	BTB-00017157	2	1	DOM	5/31	70/201	0.1488		1	BTB-00017157	2	1	REC	0/36	8/263	0.6027
1	BovineHD0100010274	36241055	2	0.4306	0.4594	1	0.7062	0.8897		1	BovineHD0100010274	2	1	DOM	24/12	187/84	0.8486		1	BovineHD0100010274	2	1	REC	7/29	62/209	0.8319
1	BovineHD0100010279	36271350	2	0.05556	0.1311	1	0.08247	0.3899		1	BovineHD0100010279	2	1	DOM	4/32	64/203	0.09151		1	BovineHD0100010279	2	1	REC	0/36	6/261	1
1	Hapmap40144-BTA-79228	36294078	1	0.01389	0.01481	2	1	0.9366		1	Hapmap40144-BTA-79228	1	2	DOM	1/35	8/262	1		1	Hapmap40144-BTA-79228	1	2	REC	0/36	0/270	1
1	BovineHD0100010292	36303690	2	0.4143	0.4682	1	0.445	0.8035		1	BovineHD0100010292	2	1	DOM	23/12	185/82	0.6994		1	BovineHD0100010292	2	1	REC	6/29	65/202	0.4034
1	BovineHD0100010297	36315758	2	0.2917	0.3407	1	0.429	0.7967		1	BovineHD0100010297	2	1	DOM	17/19	153/117	0.2908		1	BovineHD0100010297	2	1	REC	4/32	31/239	1
1	Hapmap41641-BTA-79222	36352663	1	0.4444	0.4631	2	0.8022	0.9275		1	Hapmap41641-BTA-79222	1	2	DOM	24/12	194/77	0.5601		1	Hapmap41641-BTA-79222	1	2	REC	8/28	57/214	0.8305
1	BTB-00017988	36393512	1	0.4028	0.3838	2	0.7971	1.083		1	BTB-00017988	1	2	DOM	23/13	161/110	0.7181		1	BTB-00017988	1	2	REC	6/30	47/224	1
1	BovineHD0100010321	36401673	1	0.3472	0.3056	2	0.4987	1.209		1	BovineHD0100010321	1	2	DOM	21/15	141/129	0.5945		1	BovineHD0100010321	1	2	REC	4/32	24/246	0.7565
1	BovineHD0100010328	36426174	1	0.2083	0.263	2	0.389	0.7376		1	BovineHD0100010328	1	2	DOM	13/23	125/145	0.2872		1	BovineHD0100010328	1	2	REC	2/34	17/253	1
1	ARS-BFGL-BAC-4996	36459510	1	0.3472	0.2989	2	0.4151	1.248		1	ARS-BFGL-BAC-4996	1	2	DOM	21/15	138/133	0.4788		1	ARS-BFGL-BAC-4996	1	2	REC	4/32	24/247	0.7562
1	Hapmap57330-rs29009759	36486706	1	0.25	0.1734	2	0.1422	1.589		1	Hapmap57330-rs29009759	1	2	DOM	17/19	88/183	0.09307		1	Hapmap57330-rs29009759	1	2	REC	1/35	6/265	0.5862
1	BTA-79216-no-rs	36519957	2	0.1111	0.04613	1	0.04409	2.585		1	BTA-79216-no-rs	2	1	DOM	7/29	24/247	0.0705		1	BTA-79216-no-rs	2	1	REC	1/35	1/270	0.2211
1	BovineHD0100010364	36554587	1	0.4861	0.4981	2	0.9004	0.953		1	BovineHD0100010364	1	2	DOM	25/11	197/73	0.6921		1	BovineHD0100010364	1	2	REC	10/26	72/198	0.844
1	BTB-00017697	36582476	1	0.1528	0.06827	2	0.01862	2.461		1	BTB-00017697	1	2	DOM	10/26	36/235	0.04243		1	BTB-00017697	1	2	REC	1/35	1/270	0.2211
1	ARS-BFGL-BAC-11284	36610037	1	0.3611	0.4041	2	0.5237	0.8336		1	ARS-BFGL-BAC-11284	1	2	DOM	22/14	173/98	0.854		1	ARS-BFGL-BAC-11284	1	2	REC	4/32	46/225	0.4758
1	ARS-BFGL-NGS-116207	36639642	2	0.2361	0.3321	1	0.1084	0.6216		1	ARS-BFGL-NGS-116207	2	1	DOM	14/22	150/121	0.07559		1	ARS-BFGL-NGS-116207	2	1	REC	3/33	30/241	0.7798
1	Hapmap50474-BTA-79209	36666981	2	0.01389	0.02214	1	1	0.6221		1	Hapmap50474-BTA-79209	2	1	DOM	1/35	12/259	1		1	Hapmap50474-BTA-79209	2	1	REC	0/36	0/271	1
1	BovineHD0100010393	36673470	1	0.4167	0.4465	2	0.7053	0.8855		1	BovineHD0100010393	1	2	DOM	22/14	180/91	0.5762		1	BovineHD0100010393	1	2	REC	8/28	62/209	1
1	BTB-00017422	36693898	2	0.1944	0.1956	1	1	0.9928		1	BTB-00017422	2	1	DOM	13/23	91/180	0.8516		1	BTB-00017422	2	1	REC	1/35	15/256	0.704
1	BovineHD0100010400	36708125	2	0.2917	0.3759	1	0.193	0.6836		1	BovineHD0100010400	2	1	DOM	18/18	161/109	0.2848		1	BovineHD0100010400	2	1	REC	3/33	42/228	0.3224
1	BovineHD0100010416	36791630	1	0.2639	0.2823	2	0.7821	0.9115		1	BovineHD0100010416	1	2	DOM	18/18	136/135	1		1	BovineHD0100010416	1	2	REC	1/35	17/254	0.7058
1	Hapmap43356-BTA-79201	36796167	1	0.1667	0.1771	2	1	0.9292		1	Hapmap43356-BTA-79201	1	2	DOM	12/24	88/183	1		1	Hapmap43356-BTA-79201	1	2	REC	0/36	8/263	0.6027
1	BovineHD0100010421	36813260	2	0.4028	0.4465	1	0.5288	0.8361		1	BovineHD0100010421	2	1	DOM	24/12	179/92	1		1	BovineHD0100010421	2	1	REC	5/31	63/208	0.285
1	BovineHD0100010461	36943147	2	0.375	0.4188	1	0.5255	0.8326		1	BovineHD0100010461	2	1	DOM	21/15	166/105	0.7208		1	BovineHD0100010461	2	1	REC	6/30	61/210	0.523
1	Hapmap50634-BTA-26738	36991506	2	0.3472	0.3266	1	0.7896	1.097		1	Hapmap50634-BTA-26738	2	1	DOM	20/16	148/123	1		1	Hapmap50634-BTA-26738	2	1	REC	5/31	29/242	0.5718
1	BovineHD0100010491	37050569	2	0.125	0.1421	1	0.8567	0.8627		1	BovineHD0100010491	2	1	DOM	9/27	70/201	1		1	BovineHD0100010491	2	1	REC	0/36	7/264	1
1	Hapmap49369-BTA-89952	37219767	1	0.4028	0.3506	2	0.4323	1.249		1	Hapmap49369-BTA-89952	1	2	DOM	24/12	157/114	0.3697		1	Hapmap49369-BTA-89952	1	2	REC	5/31	33/238	0.7875
1	BovineHD0100010528	37232068	2	0.1857	0.2082	1	0.7544	0.8675		1	BovineHD0100010528	2	1	DOM	11/24	99/170	0.5801		1	BovineHD0100010528	2	1	REC	2/33	13/256	0.6862
1	BovineHD0100010535	37260062	2	0.4167	0.4077	1	0.899	1.037		1	BovineHD0100010535	2	1	DOM	21/15	179/92	0.3589		1	BovineHD0100010535	2	1	REC	9/27	42/229	0.1561
1	BTA-115758-no-rs	37299219	2	0.1111	0.1015	1	0.8358	1.107		1	BTA-115758-no-rs	2	1	DOM	8/28	53/218	0.662		1	BTA-115758-no-rs	2	1	REC	0/36	2/269	1
1	BovineHD0100010565	37336681	2	0.4714	0.4205	1	0.4419	1.229		1	BovineHD0100010565	2	1	DOM	24/11	176/88	1		1	BovineHD0100010565	2	1	REC	9/26	46/218	0.2475
1	BovineHD0100010579	37359664	1	0.25	0.2528	2	1	0.9854		1	BovineHD0100010579	1	2	DOM	15/21	119/152	0.8593		1	BovineHD0100010579	1	2	REC	3/33	18/253	0.723
1	BovineHD0100010581	37368303	1	0.1429	0.1245	2	0.7016	1.172		1	BovineHD0100010581	1	2	DOM	10/25	63/202	0.5334		1	BovineHD0100010581	1	2	REC	0/35	3/262	1
1	DPI-27	37381473	1	0.4306	0.3081	2	0.04389	1.698		1	DPI-27	1	2	DOM	23/13	138/133	0.1585		1	DPI-27	1	2	REC	8/28	29/242	0.0568
1	BTA-111760-no-rs	37412751	1	0.06944	0.07011	2	1	0.9898		1	BTA-111760-no-rs	1	2	DOM	5/31	37/234	1		1	BTA-111760-no-rs	1	2	REC	0/36	1/270	1
1	BovineHD4100000204	37455994	1	0.5139	0.3487	2	0.008916	1.974		1	BovineHD4100000204	1	2	DOM	27/9	153/118	0.04641		1	BovineHD4100000204	1	2	REC	10/26	36/235	0.04243
1	Hapmap46343-BTA-111768	37513415	2	0.5139	0.3561	1	0.01334	1.912		1	Hapmap46343-BTA-111768	2	1	DOM	27/9	157/114	0.06908		1	Hapmap46343-BTA-111768	2	1	REC	10/26	36/235	0.04243
1	BTA-111771-no-rs	37570425	2	0.4167	0.4019	1	0.7998	1.063		1	BTA-111771-no-rs	2	1	DOM	21/15	170/100	0.5879		1	BTA-111771-no-rs	2	1	REC	9/27	47/223	0.2586
1	BovineHD0100010640	37575077	1	0.2143	0.3346	2	0.05567	0.5424		1	BovineHD0100010640	1	2	DOM	12/23	143/123	0.03229		1	BovineHD0100010640	1	2	REC	3/32	35/231	0.5927
1	ARS-BFGL-NGS-84905	37606303	2	0.3571	0.3667	1	1	0.9596		1	ARS-BFGL-NGS-84905	2	1	DOM	16/19	156/114	0.2059		1	ARS-BFGL-NGS-84905	2	1	REC	9/26	42/228	0.148
1	BTA-120277-no-rs	37642573	1	0.2778	0.1919	2	0.1167	1.62		1	BTA-120277-no-rs	1	2	DOM	15/21	86/185	0.2591		1	BTA-120277-no-rs	1	2	REC	5/31	18/253	0.1665
1	BovineHD0100010694	37723915	2	0.5429	0.4887	1	0.4459	1.243		1	BovineHD0100010694	2	1	DOM	26/9	194/71	1		1	BovineHD0100010694	2	1	REC	12/23	65/200	0.221
1	BovineHD4100000205	37780384	1	0.3333	0.3303	2	1	1.014		1	BovineHD4100000205	1	2	DOM	18/18	145/126	0.7249		1	BovineHD4100000205	1	2	REC	6/30	34/237	0.4395
1	BovineHD0100010740	37812572	2	0.5143	0.461	1	0.4455	1.238		1	BovineHD0100010740	2	1	DOM	25/10	192/77	1		1	BovineHD0100010740	2	1	REC	11/24	56/213	0.1916
1	BovineHD0100010753	37875353	2	0.2857	0.2435	1	0.4629	1.243		1	BovineHD0100010753	2	1	DOM	15/20	111/158	0.8573		1	BovineHD0100010753	2	1	REC	5/30	20/249	0.1854
1	BovineHD0100010754	37876071	2	0.3	0.2538	1	0.4678	1.26		1	BovineHD0100010754	2	1	DOM	16/19	113/151	0.8562		1	BovineHD0100010754	2	1	REC	5/30	21/243	0.2064
1	ARS-BFGL-NGS-23720	37942216	2	0.4167	0.3893	1	0.7005	1.121		1	ARS-BFGL-NGS-23720	2	1	DOM	22/14	168/103	1		1	ARS-BFGL-NGS-23720	2	1	REC	8/28	43/228	0.3427
1	ARS-BFGL-NGS-53463	38076935	2	0.25	0.2343	1	0.7686	1.089		1	ARS-BFGL-NGS-53463	2	1	DOM	14/22	109/162	1		1	ARS-BFGL-NGS-53463	2	1	REC	4/32	18/253	0.3066
1	BovineHD0100010842	38112817	2	0.1714	0.2876	1	0.04559	0.5125		1	BovineHD0100010842	2	1	DOM	10/25	131/135	0.02954		1	BovineHD0100010842	2	1	REC	2/33	22/244	1
1	BovineHD0100010886	38222228	1	0.5	0.4599	2	0.6101	1.174		1	BovineHD0100010886	1	2	DOM	25/10	186/76	1		1	BovineHD0100010886	1	2	REC	10/25	55/207	0.3828
1	ARS-BFGL-NGS-100005	38262971	1	0.3143	0.3524	2	0.5948	0.8423		1	ARS-BFGL-NGS-100005	1	2	DOM	18/17	155/116	0.5879		1	ARS-BFGL-NGS-100005	1	2	REC	4/31	36/235	1
1	ARS-BFGL-NGS-114608	38309499	1	0.375	0.4142	2	0.61	0.8486		1	ARS-BFGL-NGS-114608	1	2	DOM	20/16	171/97	0.3615		1	ARS-BFGL-NGS-114608	1	2	REC	7/29	51/217	1
1	BovineHD0100010966	38434232	1	0.2857	0.2226	2	0.2309	1.397		1	BovineHD0100010966	1	2	DOM	18/17	105/160	0.203		1	BovineHD0100010966	1	2	REC	2/33	13/252	0.6899
1	BovineHD0100010977	38490335	1	0.3143	0.303	2	0.8903	1.054		1	BovineHD0100010977	1	2	DOM	18/17	135/134	1		1	BovineHD0100010977	1	2	REC	4/31	28/241	0.7736
1	BovineHD0100011008	38597502	2	0.1111	0.1734	1	0.2374	0.5957		1	BovineHD0100011008	2	1	DOM	8/28	86/185	0.3357		1	BovineHD0100011008	2	1	REC	0/36	8/263	0.6027
1	ARS-BFGL-NGS-42813	38630217	2	0.2639	0.2362	1	0.6592	1.159		1	ARS-BFGL-NGS-42813	2	1	DOM	15/21	109/162	0.8588		1	ARS-BFGL-NGS-42813	2	1	REC	4/32	19/252	0.3273
1	BovineHD0100011029	38649320	1	0.3286	0.4586	2	0.04126	0.5776		1	BovineHD0100011029	1	2	DOM	19/16	176/90	0.1891		1	BovineHD0100011029	1	2	REC	4/31	68/198	0.08981
1	BovineHD0100011034	38673068	1	0.4429	0.2955	2	0.019	1.895		1	BovineHD0100011034	1	2	DOM	25/10	130/134	0.01839		1	BovineHD0100011034	1	2	REC	6/29	26/238	0.2382
1	ARS-BFGL-NGS-85768	38707374	2	0.06944	0.07749	1	1	0.8884		1	ARS-BFGL-NGS-85768	2	1	DOM	5/31	39/232	1		1	ARS-BFGL-NGS-85768	2	1	REC	0/36	3/268	1
1	BTA-16749-no-rs	38752163	1	0.09722	0.07196	2	0.4722	1.389		1	BTA-16749-no-rs	1	2	DOM	6/30	37/234	0.6114		1	BTA-16749-no-rs	1	2	REC	1/35	2/269	0.313
1	Hapmap51081-BTA-89053	38776974	1	0	0.01296	2	1	0		1	Hapmap51081-BTA-89053	1	2	DOM	0/36	7/263	1		1	Hapmap51081-BTA-89053	1	2	REC	0/36	0/270	1
1	BovineHD0100011072	38816049	2	0.4028	0.321	1	0.1829	1.426		1	BovineHD0100011072	2	1	DOM	22/14	147/124	0.4795		1	BovineHD0100011072	2	1	REC	7/29	27/244	0.0947
1	BovineHD0100011079	38856511	1	0.3571	0.3008	2	0.3376	1.292		1	BovineHD0100011079	1	2	DOM	21/14	130/136	0.2807		1	BovineHD0100011079	1	2	REC	4/31	30/236	1
1	BovineHD0100011092	38919419	1	0.2143	0.1823	2	0.5151	1.223		1	BovineHD0100011092	1	2	DOM	14/21	88/178	0.4496		1	BovineHD0100011092	1	2	REC	1/34	9/257	1
1	BovineHD0100011097	38944944	1	0.2429	0.2698	2	0.7737	0.8681		1	BovineHD0100011097	1	2	DOM	15/20	124/141	0.7205		1	BovineHD0100011097	1	2	REC	2/33	19/246	1
1	BovineHD0100011107	38985194	2	0.3	0.2962	1	1	1.018		1	BovineHD0100011107	2	1	DOM	19/16	131/134	0.7195		1	BovineHD0100011107	2	1	REC	2/33	26/239	0.7555
1	ARS-BFGL-NGS-97815	39014333	1	0.2917	0.2952	2	1	0.9831		1	ARS-BFGL-NGS-97815	1	2	DOM	18/18	129/142	0.8598		1	ARS-BFGL-NGS-97815	1	2	REC	3/33	31/240	0.7795
1	BovineHD0100011117	39054297	2	0.3286	0.3459	1	0.8936	0.9255		1	BovineHD0100011117	2	1	DOM	20/15	152/114	1		1	BovineHD0100011117	2	1	REC	3/32	32/234	0.7797
1	BovineHD0100011134	39142467	2	0.4857	0.4792	1	1	1.027		1	BovineHD0100011134	2	1	DOM	25/10	187/77	1		1	BovineHD0100011134	2	1	REC	9/26	66/198	1
1	BTA-109574-no-rs	39198219	2	0.2714	0.3819	1	0.08671	0.6029		1	BTA-109574-no-rs	2	1	DOM	16/19	162/109	0.1447		1	BTA-109574-no-rs	2	1	REC	3/32	45/226	0.3224
1	Hapmap39970-BTA-117984	39249574	1	0.2083	0.2565	2	0.4694	0.763		1	Hapmap39970-BTA-117984	1	2	DOM	13/23	120/151	0.3769		1	Hapmap39970-BTA-117984	1	2	REC	2/34	19/252	1
1	ARS-BFGL-NGS-26011	39292042	1	0.3194	0.3247	2	1	0.9761		1	ARS-BFGL-NGS-26011	1	2	DOM	18/18	143/128	0.8594		1	ARS-BFGL-NGS-26011	1	2	REC	5/31	33/238	0.7875
1	BTA-96881-no-rs	39365760	2	0.25	0.2823	1	0.6749	0.8475		1	BTA-96881-no-rs	2	1	DOM	15/21	129/142	0.5948		1	BTA-96881-no-rs	2	1	REC	3/33	24/247	1
1	BovineHD0100011202	39399871	1	0.3056	0.3155	2	1	0.9546		1	BovineHD0100011202	1	2	DOM	17/19	140/131	0.7232		1	BovineHD0100011202	1	2	REC	5/31	31/240	0.5904
1	BovineHD0100011251	39585612	2	0.4429	0.5019	1	0.3754	0.7889		1	BovineHD0100011251	2	1	DOM	24/11	203/63	0.3047		1	BovineHD0100011251	2	1	REC	7/28	64/202	0.677
1	BovineHD0100011262	39638269	1	0.1714	0.2838	2	0.04629	0.522		1	BovineHD0100011262	1	2	DOM	11/24	129/137	0.07115		1	BovineHD0100011262	1	2	REC	1/34	22/244	0.4939
1	Hapmap47738-BTA-79246	39643915	2	0.2917	0.3093	1	0.8919	0.9197		1	Hapmap47738-BTA-79246	2	1	DOM	17/19	141/129	0.5985		1	Hapmap47738-BTA-79246	2	1	REC	4/32	26/244	0.7657
1	ARS-BFGL-BAC-12579	39724349	1	0.5139	0.4742	2	0.5331	1.172		1	ARS-BFGL-BAC-12579	1	2	DOM	27/9	192/79	0.6975		1	ARS-BFGL-BAC-12579	1	2	REC	10/26	65/206	0.6799
1	BovineHD0100011299	39791496	2	0.4143	0.3996	1	0.897	1.063		1	BovineHD0100011299	2	1	DOM	23/12	172/97	1		1	BovineHD0100011299	2	1	REC	6/29	43/226	0.8097
1	Hapmap27571-BTA-123885	39883372	1	0.4167	0.3463	2	0.2411	1.348		1	Hapmap27571-BTA-123885	1	2	DOM	24/12	154/116	0.2875		1	Hapmap27571-BTA-123885	1	2	REC	6/30	33/237	0.4298
1	ARS-BFGL-NGS-107020	39954780	1	0.1806	0.2362	2	0.3707	0.7127		1	ARS-BFGL-NGS-107020	1	2	DOM	12/24	110/161	0.4707		1	ARS-BFGL-NGS-107020	1	2	REC	1/35	18/253	0.7099
1	BovineHD0100011370	39999162	1	0.4571	0.4608	2	1	0.9853		1	BovineHD0100011370	1	2	DOM	25/10	187/81	1		1	BovineHD0100011370	1	2	REC	7/28	60/208	0.832
1	BovineHD0100011377	40023410	2	0.5143	0.468	1	0.5248	1.203		1	BovineHD0100011377	2	1	DOM	27/8	192/74	0.6868		1	BovineHD0100011377	2	1	REC	9/26	57/209	0.5231
1	BTB-00018760	40036006	2	0.3472	0.3413	1	1	1.026		1	BTB-00018760	2	1	DOM	20/16	153/118	1		1	BTB-00018760	2	1	REC	5/31	32/239	0.7843
1	Hapmap38790-BTA-87413	40075624	2	0.2941	0.4176	1	0.06553	0.5811		1	Hapmap38790-BTA-87413	2	1	DOM	18/16	175/92	0.1837		1	Hapmap38790-BTA-87413	2	1	REC	2/32	48/219	0.08754
1	BovineHD0100011399	40135823	1	0.2143	0.1805	2	0.5123	1.239		1	BovineHD0100011399	1	2	DOM	14/21	86/180	0.4452		1	BovineHD0100011399	1	2	REC	1/34	10/256	1
1	ARS-BFGL-BAC-13195	40136994	1	0.08333	0.07963	2	0.82	1.051		1	ARS-BFGL-BAC-13195	1	2	DOM	6/30	41/229	0.8067		1	ARS-BFGL-BAC-13195	1	2	REC	0/36	2/268	1
1	BTB-01806368	40162427	1	0.4861	0.4244	2	0.3755	1.283		1	BTB-01806368	1	2	DOM	24/12	175/96	0.8548		1	BTB-01806368	1	2	REC	11/25	55/216	0.1936
1	ARS-BFGL-NGS-34353	40189561	2	0.1944	0.163	1	0.5019	1.24		1	ARS-BFGL-NGS-34353	2	1	DOM	13/23	80/190	0.4437		1	ARS-BFGL-NGS-34353	2	1	REC	1/35	8/262	1
1	BTB-00018513	40216456	2	0.1	0.07963	1	0.4942	1.284		1	BTB-00018513	2	1	DOM	7/28	41/229	0.4616		1	BTB-00018513	2	1	REC	0/35	2/268	1
1	ARS-BFGL-NGS-20360	40253747	1	0.1143	0.07778	2	0.3504	1.53		1	ARS-BFGL-NGS-20360	1	2	DOM	8/27	40/230	0.2213		1	ARS-BFGL-NGS-20360	1	2	REC	0/35	2/268	1
1	BTB-00018431	40278698	1	0.4306	0.4889	2	0.3811	0.7903		1	BTB-00018431	1	2	DOM	23/13	196/75	0.3276		1	BTB-00018431	1	2	REC	8/28	69/202	0.8383
1	BTB-00018408	40296142	1	0.2083	0.1845	2	0.6305	1.163		1	BTB-00018408	1	2	DOM	12/24	88/183	1		1	BTB-00018408	1	2	REC	3/33	12/259	0.3982
1	BTB-01249999	40420207	2	0.3333	0.3266	1	0.8945	1.031		1	BTB-01249999	2	1	DOM	18/18	149/122	0.5971		1	BTB-01249999	2	1	REC	6/30	28/243	0.2594
1	BTA-117821-no-rs	40452500	2	0.3194	0.2731	1	0.4042	1.25		1	BTA-117821-no-rs	2	1	DOM	20/16	133/138	0.4837		1	BTA-117821-no-rs	2	1	REC	3/33	15/256	0.4536
1	BovineHD0100011469	40467149	2	0.4714	0.4267	1	0.5218	1.198		1	BovineHD0100011469	2	1	DOM	24/11	185/81	1		1	BovineHD0100011469	2	1	REC	9/26	42/224	0.1522
1	BTB-01250106	40506922	2	0.2857	0.2678	1	0.7751	1.094		1	BTB-01250106	2	1	DOM	18/17	126/141	0.7199		1	BTB-01250106	2	1	REC	2/33	17/250	1
1	ARS-BFGL-NGS-86662	40576723	1	0.4306	0.4779	2	0.5301	0.8262		1	ARS-BFGL-NGS-86662	1	2	DOM	22/14	196/75	0.1743		1	ARS-BFGL-NGS-86662	1	2	REC	9/27	63/208	0.835
1	ARS-BFGL-BAC-13216	40629765	2	0.5	0.4613	1	0.6153	1.168		1	ARS-BFGL-BAC-13216	2	1	DOM	26/10	185/86	0.7052		1	ARS-BFGL-BAC-13216	2	1	REC	10/26	65/206	0.6799
1	BovineHD0100011507	40652007	2	0.02857	0.04699	1	0.7581	0.5965		1	BovineHD0100011507	2	1	DOM	2/33	23/243	0.7509		1	BovineHD0100011507	2	1	REC	0/35	2/264	1
1	ARS-BFGL-NGS-23908	40691521	2	0.08571	0.05224	1	0.2654	1.701		1	ARS-BFGL-NGS-23908	2	1	DOM	6/29	27/241	0.2434		1	ARS-BFGL-NGS-23908	2	1	REC	0/35	1/267	1
1	BTB-01250420	40721810	1	0.02778	0.04244	2	0.7564	0.6447		1	BTB-01250420	1	2	DOM	2/34	21/250	1		1	BTB-01250420	1	2	REC	0/36	2/269	1
1	BovineHD0100011523	40725446	2	0.3	0.3472	1	0.5033	0.8059		1	BovineHD0100011523	2	1	DOM	17/18	153/112	0.3649		1	BovineHD0100011523	2	1	REC	4/31	31/234	1
1	Hapmap45471-BTA-117823	40748287	1	0.4583	0.4797	2	0.802	0.9178		1	Hapmap45471-BTA-117823	1	2	DOM	23/13	191/80	0.4426		1	Hapmap45471-BTA-117823	1	2	REC	10/26	69/202	0.8393
1	BTB-01250478	40763708	2	0.2639	0.297	1	0.6795	0.8484		1	BTB-01250478	2	1	DOM	15/21	131/140	0.4822		1	BTB-01250478	2	1	REC	4/32	30/241	1
1	ARS-BFGL-NGS-111921	40795725	2	0.2917	0.3247	1	0.687	0.8563		1	ARS-BFGL-NGS-111921	2	1	DOM	17/19	145/126	0.4842		1	ARS-BFGL-NGS-111921	2	1	REC	4/32	31/240	1
1	BTB-01952363	40834252	2	0.2917	0.2768	1	0.7809	1.076		1	BTB-01952363	2	1	DOM	18/18	132/139	1		1	BTB-01952363	2	1	REC	3/33	18/253	0.723
1	BTA-111731-no-rs	40864128	2	0.06944	0.0369	1	0.1991	1.948		1	BTA-111731-no-rs	2	1	DOM	5/31	20/251	0.1919		1	BTA-111731-no-rs	2	1	REC	0/36	0/271	1
1	ARS-BFGL-NGS-32825	40909078	1	0.3194	0.2749	2	0.4849	1.238		1	ARS-BFGL-NGS-32825	1	2	DOM	18/18	125/146	0.7235		1	ARS-BFGL-NGS-32825	1	2	REC	5/31	24/247	0.3592
1	BTB-01462455	40956637	2	0.1111	0.04815	1	0.04821	2.471		1	BTB-01462455	2	1	DOM	8/28	26/244	0.04204		1	BTB-01462455	2	1	REC	0/36	0/270	1
1	Hapmap34927-BES7_Contig453_1164	40987746	2	0.3056	0.2	1	0.04623	1.76		1	Hapmap34927-BES7_Contig453_1164	2	1	DOM	19/17	94/176	0.04333		1	Hapmap34927-BES7_Contig453_1164	2	1	REC	3/33	14/256	0.4339
1	Hapmap38709-BTA-88324	41023006	2	0.2222	0.1439	1	0.1147	1.7		1	Hapmap38709-BTA-88324	2	1	DOM	14/22	74/197	0.1704		1	Hapmap38709-BTA-88324	2	1	REC	2/34	4/267	0.1483
1	ARS-BFGL-NGS-100232	41088436	2	0.3056	0.19	1	0.02866	1.875		1	ARS-BFGL-NGS-100232	2	1	DOM	19/17	90/181	0.02614		1	ARS-BFGL-NGS-100232	2	1	REC	3/33	13/258	0.4142
1	BTB-01555269	41160880	2	0.3333	0.3801	1	0.5174	0.8155		1	BTB-01555269	2	1	DOM	19/17	162/109	0.4725		1	BTB-01555269	2	1	REC	5/31	44/227	1
1	BovineHD0100046971	41184151	1	0.3143	0.3542	2	0.5941	0.8358		1	BovineHD0100046971	1	2	DOM	20/15	145/119	0.8579		1	BovineHD0100046971	1	2	REC	2/33	42/222	0.1316
1	BTB-01555328	41196178	2	0.4167	0.4185	1	1	0.9924		1	BTB-01555328	2	1	DOM	24/12	175/95	1		1	BTB-01555328	2	1	REC	6/30	51/219	1
1	BovineHD0100011631	41216415	2	0.5143	0.4771	1	0.6112	1.16		1	BovineHD0100011631	2	1	DOM	28/7	185/77	0.3188		1	BovineHD0100011631	2	1	REC	8/27	65/197	1
1	ARS-BFGL-NGS-45335	41245618	2	0.4167	0.4262	1	0.8998	0.9617		1	ARS-BFGL-NGS-45335	2	1	DOM	24/12	178/93	1		1	ARS-BFGL-NGS-45335	2	1	REC	6/30	53/218	0.8234
1	BTB-01135685	41366993	2	0.1667	0.1624	1	0.8666	1.032		1	BTB-01135685	2	1	DOM	10/26	77/194	1		1	BTB-01135685	2	1	REC	2/34	11/260	0.6551
1	BovineHD0100011712	41428053	1	0.2714	0.2688	2	1	1.013		1	BovineHD0100011712	1	2	DOM	15/20	120/146	0.8579		1	BovineHD0100011712	1	2	REC	4/31	23/243	0.5347
1	BTB-01135743	41433644	2	0.2361	0.2278	1	0.8816	1.048		1	BTB-01135743	2	1	DOM	14/22	107/163	1		1	BTB-01135743	2	1	REC	3/33	16/254	0.4773
1	Hapmap23514-BTA-150593	41455680	2	0.2083	0.1494	1	0.2252	1.498		1	Hapmap23514-BTA-150593	2	1	DOM	13/23	72/199	0.2382		1	Hapmap23514-BTA-150593	2	1	REC	2/34	9/262	0.6245
1	Hapmap47786-BTA-95575	41562654	1	0.1389	0.1255	2	0.7084	1.124		1	Hapmap47786-BTA-95575	1	2	DOM	10/26	64/207	0.6782		1	Hapmap47786-BTA-95575	1	2	REC	0/36	4/267	1
1	BovineHD0100011755	41586998	1	0.1857	0.2688	2	0.1488	0.6204		1	BovineHD0100011755	1	2	DOM	12/23	119/147	0.2792		1	BovineHD0100011755	1	2	REC	1/34	24/242	0.3317
1	BovineHD0100011761	41618997	2	0.3	0.3371	1	0.5908	0.8427		1	BovineHD0100011761	2	1	DOM	16/19	144/120	0.3694		1	BovineHD0100011761	2	1	REC	5/30	34/230	0.7908
1	BovineHD0100011765	41632942	2	0.1714	0.2124	1	0.5302	0.7674		1	BovineHD0100011765	2	1	DOM	11/24	99/160	0.4641		1	BovineHD0100011765	2	1	REC	1/34	11/248	1
1	BovineHD0100011774	41670410	1	0.3286	0.392	2	0.3605	0.7589		1	BovineHD0100011774	1	2	DOM	17/18	163/101	0.145		1	BovineHD0100011774	1	2	REC	6/29	44/220	1
1	BTA-95584-no-rs	41686185	1	0.1857	0.203	2	0.8742	0.8957		1	BTA-95584-no-rs	1	2	DOM	11/24	97/174	0.7086		1	BTA-95584-no-rs	1	2	REC	2/33	13/258	0.6845
1	BovineHD0100011786	41728692	1	0.2429	0.3477	2	0.1054	0.6016		1	BovineHD0100011786	1	2	DOM	14/21	149/117	0.1034		1	BovineHD0100011786	1	2	REC	3/32	36/230	0.5932
1	Hapmap38486-BTA-30602	41750066	1	0.4583	0.4207	2	0.6121	1.165		1	Hapmap38486-BTA-30602	1	2	DOM	25/11	181/90	0.8513		1	Hapmap38486-BTA-30602	1	2	REC	8/28	47/224	0.489
1	BovineHD0100011799	41770783	1	0.4286	0.3914	2	0.6035	1.166		1	BovineHD0100011799	1	2	DOM	24/11	169/98	0.5805		1	BovineHD0100011799	1	2	REC	6/29	40/227	0.802
1	Hapmap38103-BTA-28646	41788052	2	0.2361	0.2159	1	0.7613	1.123		1	Hapmap38103-BTA-28646	2	1	DOM	15/21	107/164	0.8569		1	Hapmap38103-BTA-28646	2	1	REC	2/34	10/261	0.6388
1	BTB-01848824	41835927	1	0.25	0.3432	2	0.1425	0.638		1	BTB-01848824	1	2	DOM	15/21	149/122	0.1559		1	BTB-01848824	1	2	REC	3/33	37/234	0.5967
1	BTA-122159-no-rs	41860729	1	0.4306	0.3967	2	0.6098	1.15		1	BTA-122159-no-rs	1	2	DOM	25/11	169/102	0.4655		1	BTA-122159-no-rs	1	2	REC	6/30	46/225	1
1	BTB-01136210	41886688	1	0.125	0.1328	2	1	0.9325		1	BTB-01136210	1	2	DOM	8/28	70/201	0.8386		1	BTB-01136210	1	2	REC	1/35	2/269	0.313
1	BovineHD0100011834	41905455	2	0.3286	0.4377	1	0.09461	0.6286		1	BovineHD0100011834	2	1	DOM	19/16	186/79	0.08031		1	BovineHD0100011834	2	1	REC	4/31	46/219	0.4749
1	BovineHD0100011840	41922668	2	0.3	0.2774	1	0.6734	1.117		1	BovineHD0100011840	2	1	DOM	18/17	127/138	0.7222		1	BovineHD0100011840	2	1	REC	3/32	20/245	0.7397
1	ARS-BFGL-NGS-106725	41948372	2	0.2361	0.3229	1	0.1755	0.6482		1	ARS-BFGL-NGS-106725	2	1	DOM	15/21	153/118	0.1097		1	ARS-BFGL-NGS-106725	2	1	REC	2/34	22/249	1
1	BovineHD0100011849	41949404	2	0.3472	0.5111	1	0.01171	0.5089		1	BovineHD0100011849	2	1	DOM	20/16	209/62	0.007848		1	BovineHD0100011849	2	1	REC	5/31	68/203	0.2094
1	Hapmap54599-rs29019617	41978469	2	0.4444	0.3778	1	0.3031	1.318		1	Hapmap54599-rs29019617	2	1	DOM	23/13	160/110	0.718		1	Hapmap54599-rs29019617	2	1	REC	9/27	44/226	0.2385
1	ARS-BFGL-NGS-23369	42009799	1	0.2639	0.321	2	0.348	0.7582		1	ARS-BFGL-NGS-23369	1	2	DOM	16/20	145/126	0.3751		1	ARS-BFGL-NGS-23369	1	2	REC	3/33	29/242	1
1	1_41754173	42125330	2	0.4	0.3472	1	0.4252	1.254		1	1_41754173	2	1	DOM	20/15	147/118	1		1	1_41754173	2	1	REC	8/27	37/228	0.2044
1	1_41768691	42139849	2	0.1429	0.1326	1	0.8516	1.09		1	1_41768691	2	1	DOM	8/27	65/199	1		1	1_41768691	2	1	REC	2/33	5/259	0.1921
1	Hapmap48210-BTA-120730	42205645	2	0.4861	0.3727	1	0.07146	1.592		1	Hapmap48210-BTA-120730	2	1	DOM	25/11	160/111	0.2784		1	Hapmap48210-BTA-120730	2	1	REC	10/26	42/229	0.09399
1	BovineHD0100011951	42217977	1	0.2639	0.3044	2	0.5841	0.8191		1	BovineHD0100011951	1	2	DOM	16/20	142/129	0.3815		1	BovineHD0100011951	1	2	REC	3/33	23/248	1
1	ARS-BFGL-NGS-106432	42264448	2	0.4306	0.4022	1	0.7019	1.124		1	ARS-BFGL-NGS-106432	2	1	DOM	23/13	171/100	1		1	ARS-BFGL-NGS-106432	2	1	REC	8/28	47/224	0.489
1	ARS-BFGL-BAC-15157	42285326	2	0.2917	0.31	1	0.7877	0.9167		1	ARS-BFGL-BAC-15157	2	1	DOM	17/19	138/133	0.7249		1	ARS-BFGL-BAC-15157	2	1	REC	4/32	30/241	1
1	Hapmap50812-BTA-89669	42347846	1	0.3333	0.2362	2	0.0814	1.617		1	Hapmap50812-BTA-89669	1	2	DOM	18/18	114/157	0.3764		1	Hapmap50812-BTA-89669	1	2	REC	6/30	14/257	0.01942
1	1_41998867	42370137	2	0.4714	0.4436	1	0.702	1.119		1	1_41998867	2	1	DOM	25/10	181/85	0.8469		1	1_41998867	2	1	REC	8/27	55/211	0.8251
1	BTB-01708786	42513439	2	0.4722	0.3967	1	0.2505	1.361		1	BTB-01708786	2	1	DOM	23/13	165/106	0.8559		1	BTB-01708786	2	1	REC	11/25	50/221	0.1169
1	BovineHD0100012074	42562079	2	0.3889	0.4556	1	0.3142	0.7605		1	BovineHD0100012074	2	1	DOM	22/14	192/78	0.2467		1	BovineHD0100012074	2	1	REC	6/30	54/216	0.8235
1	BovineHD0100012062	42600264	1	0.1286	0.126	2	1	1.024		1	BovineHD0100012062	1	2	DOM	8/27	63/199	1		1	BovineHD0100012062	1	2	REC	1/34	3/259	0.3961
1	BTA-104608-no-rs	42672277	2	0.25	0.203	1	0.3563	1.309		1	BTA-104608-no-rs	2	1	DOM	14/22	99/172	0.8545		1	BTA-104608-no-rs	2	1	REC	4/32	11/260	0.08455
1	ARS-BFGL-NGS-93346	42776430	1	0.25	0.2424	2	0.8813	1.042		1	ARS-BFGL-NGS-93346	1	2	DOM	14/20	113/151	1		1	ARS-BFGL-NGS-93346	1	2	REC	3/31	15/249	0.4433
1	BovineHD0100012112	42827966	1	0.4857	0.382	2	0.118	1.528		1	BovineHD0100012112	1	2	DOM	25/10	166/101	0.3526		1	BovineHD0100012112	1	2	REC	9/26	38/229	0.08568
1	BTB-00019582	42863111	1	0.4583	0.3985	2	0.3716	1.277		1	BTB-00019582	1	2	DOM	26/10	169/102	0.2745		1	BTB-00019582	1	2	REC	7/29	47/224	0.8156
1	ARS-BFGL-NGS-10059	42912279	1	0.2361	0.2085	2	0.6449	1.173		1	ARS-BFGL-NGS-10059	1	2	DOM	14/22	101/170	0.8563		1	ARS-BFGL-NGS-10059	1	2	REC	3/33	12/259	0.3982
1	Hapmap53820-rs29010070	42990139	1	0.1944	0.1513	2	0.3867	1.354		1	Hapmap53820-rs29010070	1	2	DOM	11/25	79/192	0.8474		1	Hapmap53820-rs29010070	1	2	REC	3/33	3/268	0.0232
1	BovineHD0100012163	43053603	1	0.02857	0.08555	2	0.1517	0.3144		1	BovineHD0100012163	1	2	DOM	2/33	44/219	0.132		1	BovineHD0100012163	1	2	REC	0/35	1/262	1
1	BovineHD0100012167	43077482	1	0.2353	0.375	2	0.03079	0.5128		1	BovineHD0100012167	1	2	DOM	12/22	162/98	0.004737		1	BovineHD0100012167	1	2	REC	4/30	33/227	1
1	BovineHD0100012169	43080767	1	0.1111	0.1734	2	0.2374	0.5957		1	BovineHD0100012169	1	2	DOM	7/29	86/185	0.1761		1	BovineHD0100012169	1	2	REC	1/35	8/263	1
1	BTB-00019705	43090697	1	0.3611	0.3266	2	0.5944	1.166		1	BTB-00019705	1	2	DOM	20/16	148/123	1		1	BTB-00019705	1	2	REC	6/30	29/242	0.272
1	BovineHD0100012176	43101882	2	0.2143	0.2432	1	0.6568	0.8485		1	BovineHD0100012176	2	1	DOM	14/21	110/149	0.8564		1	BovineHD0100012176	2	1	REC	1/34	16/243	0.7035
1	ARS-BFGL-NGS-106220	43119017	1	0.1528	0.1015	2	0.2214	1.597		1	ARS-BFGL-NGS-106220	1	2	DOM	10/26	53/218	0.2729		1	ARS-BFGL-NGS-106220	1	2	REC	1/35	2/269	0.313
1	BovineHD0100012187	43129718	1	0.2857	0.4385	2	0.01973	0.5123		1	BovineHD0100012187	1	2	DOM	16/19	177/83	0.01311		1	BovineHD0100012187	1	2	REC	4/31	51/209	0.3544
1	BovineHD0100012213	43188983	2	0.4	0.4636	1	0.3713	0.7713		1	BovineHD0100012213	2	1	DOM	21/14	188/73	0.1669		1	BovineHD0100012213	2	1	REC	7/28	54/207	1
1	ARS-BFGL-NGS-12781	43211702	1	0.09722	0.1808	2	0.09461	0.4879		1	ARS-BFGL-NGS-12781	1	2	DOM	6/30	89/182	0.05523		1	ARS-BFGL-NGS-12781	1	2	REC	1/35	9/262	1
1	BovineHD0100012223	43219861	2	0.1111	0.1605	1	0.3847	0.6537		1	BovineHD0100012223	2	1	DOM	8/28	79/192	0.4374		1	BovineHD0100012223	2	1	REC	0/36	8/263	0.6027
1	Hapmap60973-rs29018366	43258943	2	0.4583	0.3838	1	0.2482	1.359		1	Hapmap60973-rs29018366	2	1	DOM	26/10	169/102	0.2745		1	Hapmap60973-rs29018366	2	1	REC	7/29	39/232	0.4553
1	BovineHD0100012243	43299897	1	0.2	0.1502	2	0.2931	1.415		1	BovineHD0100012243	1	2	DOM	12/23	70/193	0.42		1	BovineHD0100012243	1	2	REC	2/33	9/254	0.6246
1	BovineHD0100012247	43320196	1	0.05556	0.107	2	0.2139	0.4909		1	BovineHD0100012247	1	2	DOM	4/32	52/219	0.3569		1	BovineHD0100012247	1	2	REC	0/36	6/265	1
1	BTA-89691-no-rs	43390633	1	0.02778	0.01852	2	0.6415	1.514		1	BTA-89691-no-rs	1	2	DOM	2/34	10/260	0.6394		1	BTA-89691-no-rs	1	2	REC	0/36	0/270	1
1	BTB-00019912	43428471	1	0.3056	0.2657	2	0.4818	1.216		1	BTB-00019912	1	2	DOM	16/20	129/142	0.8592		1	BTB-00019912	1	2	REC	6/30	15/256	0.02484
1	Hapmap46502-BTA-89692	43454408	1	0.3333	0.3764	2	0.5182	0.8284		1	Hapmap46502-BTA-89692	1	2	DOM	19/17	164/107	0.3735		1	Hapmap46502-BTA-89692	1	2	REC	5/31	40/231	1
1	BovineHD0100012280	43511030	1	0.3	0.3454	2	0.5033	0.8122		1	BovineHD0100012280	1	2	DOM	17/18	147/115	0.4701		1	BovineHD0100012280	1	2	REC	4/31	34/228	1
1	BovineHD0100012296	43581024	2	0.4571	0.4981	1	0.5282	0.8484		1	BovineHD0100012296	2	1	DOM	23/12	202/65	0.2185		1	BovineHD0100012296	2	1	REC	9/26	64/203	0.8347
1	BTA-20952-no-rs	43637189	2	0.4861	0.4723	1	0.9002	1.057		1	BTA-20952-no-rs	2	1	DOM	25/11	200/71	0.554		1	BTA-20952-no-rs	2	1	REC	10/26	56/215	0.3868
1	BTA-89708-no-rs	43658641	2	0.2917	0.2878	1	1	1.019		1	BTA-89708-no-rs	2	1	DOM	17/19	140/131	0.7232		1	BTA-89708-no-rs	2	1	REC	4/32	16/255	0.271
1	BovineHD0100012322	43678256	2	0.4429	0.3745	1	0.2961	1.327		1	BovineHD0100012322	2	1	DOM	24/11	162/105	0.4606		1	BovineHD0100012322	2	1	REC	7/28	38/229	0.4465
1	Hapmap47773-BTA-89713	43709324	2	0.2639	0.2804	1	0.8888	0.9198		1	Hapmap47773-BTA-89713	2	1	DOM	17/19	127/144	1		1	Hapmap47773-BTA-89713	2	1	REC	2/34	25/246	0.7532
1	BovineHD0100012336	43726634	1	0.2206	0.3042	2	0.2027	0.6474		1	BovineHD0100012336	1	2	DOM	12/22	128/135	0.1495		1	BovineHD0100012336	1	2	REC	3/31	32/231	0.7791
1	BovineHD0100012344	43740582	1	0.3714	0.3467	2	0.6904	1.113		1	BovineHD0100012344	1	2	DOM	20/15	155/106	0.8555		1	BovineHD0100012344	1	2	REC	6/29	26/235	0.2407
1	BovineHD0100012362	43774210	2	0.3571	0.2376	1	0.0394	1.782		1	BovineHD0100012362	2	1	DOM	20/15	105/158	0.06765		1	BovineHD0100012362	2	1	REC	5/30	20/243	0.192
1	BTB-00020638	43787631	2	0.05556	0.1181	1	0.159	0.4393		1	BTB-00020638	2	1	DOM	4/32	60/211	0.188		1	BTB-00020638	2	1	REC	0/36	4/267	1
1	BTB-00020648	43810175	1	0.125	0.155	2	0.6016	0.7789		1	BTB-00020648	1	2	DOM	9/27	80/191	0.697		1	BTB-00020648	1	2	REC	0/36	4/267	1
1	BTA-89719-no-rs	43831502	2	0.3611	0.3782	1	0.8971	0.9292		1	BTA-89719-no-rs	2	1	DOM	20/16	166/105	0.5868		1	BTA-89719-no-rs	2	1	REC	6/30	39/232	0.8014
1	BovineHD0100012401	43874971	2	0.4571	0.4485	1	0.8989	1.036		1	BovineHD0100012401	2	1	DOM	24/11	181/81	1		1	BovineHD0100012401	2	1	REC	8/27	54/208	0.8248
1	BovineHD0100012402	43881377	1	0.3143	0.3288	2	0.8923	0.9357		1	BovineHD0100012402	1	2	DOM	19/16	145/112	0.857		1	BovineHD0100012402	1	2	REC	3/32	24/233	1
1	BovineHD0100012406	43897459	2	0.3143	0.2302	1	0.1364	1.533		1	BovineHD0100012406	2	1	DOM	19/16	109/156	0.1495		1	BovineHD0100012406	2	1	REC	3/32	13/252	0.4127
1	ARS-BFGL-NGS-19097	43901606	2	0.3889	0.3708	1	0.7959	1.08		1	ARS-BFGL-NGS-19097	2	1	DOM	20/16	167/104	0.5859		1	ARS-BFGL-NGS-19097	2	1	REC	8/28	34/237	0.1228
1	ARS-BFGL-NGS-106743	43925940	2	0.2361	0.2657	1	0.6699	0.8543		1	ARS-BFGL-NGS-106743	2	1	DOM	15/21	119/152	0.8593		1	ARS-BFGL-NGS-106743	2	1	REC	2/34	25/246	0.7532
1	BovineHD0100012410	43926615	1	0.4861	0.4446	2	0.5301	1.181		1	BovineHD0100012410	1	2	DOM	27/9	184/87	0.4483		1	BovineHD0100012410	1	2	REC	8/28	57/214	0.8305
1	BovineHD0100012427	43970492	2	0.2857	0.2575	1	0.6641	1.153		1	BovineHD0100012427	2	1	DOM	17/18	115/151	0.5895		1	BovineHD0100012427	2	1	REC	3/32	22/244	1
1	BovineHD0100012450	44010211	2	0.3429	0.3925	1	0.514	0.8077		1	BovineHD0100012450	2	1	DOM	18/17	164/101	0.2706		1	BovineHD0100012450	2	1	REC	6/29	44/221	1
1	ARS-BFGL-NGS-96886	44050867	2	0.1389	0.1926	1	0.3343	0.6762		1	ARS-BFGL-NGS-96886	2	1	DOM	10/26	91/179	0.5731		1	ARS-BFGL-NGS-96886	2	1	REC	0/36	13/257	0.3768
1	Hapmap49368-BTA-89726	44091302	1	0.2778	0.1944	2	0.1187	1.593		1	Hapmap49368-BTA-89726	1	2	DOM	17/19	94/176	0.1957		1	Hapmap49368-BTA-89726	1	2	REC	3/33	11/259	0.2194
1	ARS-BFGL-NGS-116079	44217537	2	0.3056	0.2509	1	0.318	1.314		1	ARS-BFGL-NGS-116079	2	1	DOM	19/17	117/154	0.2893		1	ARS-BFGL-NGS-116079	2	1	REC	3/33	19/252	0.7315
1	BovineHD0100012506	44229618	2	0.4714	0.4421	1	0.7012	1.126		1	BovineHD0100012506	2	1	DOM	27/8	176/83	0.3323		1	BovineHD0100012506	2	1	REC	6/29	53/206	0.8227
1	ARS-BFGL-NGS-118317	44288613	2	0.4722	0.3911	1	0.2017	1.393		1	ARS-BFGL-NGS-118317	2	1	DOM	27/9	174/97	0.2631		1	ARS-BFGL-NGS-118317	2	1	REC	7/29	38/233	0.4496
1	BovineHD0100012535	44326918	1	0.3429	0.3444	2	1	0.9934		1	BovineHD0100012535	1	2	DOM	18/17	145/112	0.5911		1	BovineHD0100012535	1	2	REC	6/29	32/225	0.4256
1	BovineHD0100012544	44359646	2	0.4143	0.3817	1	0.6033	1.146		1	BovineHD0100012544	2	1	DOM	22/13	159/103	0.8556		1	BovineHD0100012544	2	1	REC	7/28	41/221	0.4716
1	Hapmap43396-BTA-89742	44375152	1	0.01389	0.0369	2	0.4952	0.3676		1	Hapmap43396-BTA-89742	1	2	DOM	1/35	20/251	0.4872		1	Hapmap43396-BTA-89742	1	2	REC	0/36	0/271	1
1	BovineHD0100012553	44389663	2	0.2361	0.1811	1	0.2624	1.397		1	BovineHD0100012553	2	1	DOM	15/21	86/179	0.3467		1	BovineHD0100012553	2	1	REC	2/34	10/255	0.6423
1	BovineHD0100012560	44422846	2	0.4583	0.4963	1	0.6161	0.8587		1	BovineHD0100012560	2	1	DOM	26/10	201/70	0.8404		1	BovineHD0100012560	2	1	REC	7/29	68/203	0.5403
1	ARS-BFGL-NGS-57355	44475537	1	0.09722	0.06273	2	0.31	1.609		1	ARS-BFGL-NGS-57355	1	2	DOM	7/29	31/240	0.1794		1	ARS-BFGL-NGS-57355	1	2	REC	0/36	3/268	1
1	BTB-00021247	44499948	1	0.02778	0.02052	2	0.659	1.364		1	BTB-00021247	1	2	DOM	2/34	11/257	0.6572		1	BTB-00021247	1	2	REC	0/36	0/268	1
1	BovineHD0100012597	44555369	2	0.125	0.06844	1	0.09596	1.944		1	BovineHD0100012597	2	1	DOM	9/27	35/228	0.0779		1	BovineHD0100012597	2	1	REC	0/36	1/262	1
1	BTB-01788892	44802416	1	0.1667	0.1642	2	1	1.018		1	BTB-01788892	1	2	DOM	10/26	81/190	0.8488		1	BTB-01788892	1	2	REC	2/34	8/263	0.3314
1	BovineHD0100046983	44983356	1	0.06944	0.08209	2	1	0.8345		1	BovineHD0100046983	1	2	DOM	5/31	43/225	1		1	BovineHD0100046983	1	2	REC	0/36	1/267	1
1	BovineHD0100012940	45007205	1	0.4167	0.4151	2	1	1.006		1	BovineHD0100012940	1	2	DOM	25/11	176/89	0.8509		1	BovineHD0100012940	1	2	REC	5/31	44/221	0.8128
1	ARS-BFGL-NGS-75951	45042284	2	0.06944	0.0572	1	0.5987	1.23		1	ARS-BFGL-NGS-75951	2	1	DOM	5/31	30/241	0.5805		1	ARS-BFGL-NGS-75951	2	1	REC	0/36	1/270	1
1	BovineHD0100012946	45042921	2	0.3889	0.3769	1	0.8972	1.052		1	BovineHD0100012946	2	1	DOM	23/13	163/105	0.8558		1	BovineHD0100012946	2	1	REC	5/31	39/229	1
1	ARS-BFGL-NGS-31349	45090218	2	0.09722	0.09594	1	1	1.015		1	ARS-BFGL-NGS-31349	2	1	DOM	7/29	50/221	0.8229		1	ARS-BFGL-NGS-31349	2	1	REC	0/36	2/269	1
1	BovineHD0100012963	45105866	2	0.4429	0.39	1	0.4354	1.243		1	BovineHD0100012963	2	1	DOM	24/11	158/101	0.4603		1	BovineHD0100012963	2	1	REC	7/28	44/215	0.6378
1	BovineHD0100012974	45146168	2	0.2778	0.2749	1	1	1.014		1	BovineHD0100012974	2	1	DOM	17/19	131/140	1		1	BovineHD0100012974	2	1	REC	3/33	18/253	0.723
1	BovineHD0100012982	45171571	2	0.3056	0.3638	1	0.3615	0.7694		1	BovineHD0100012982	2	1	DOM	17/19	157/111	0.2126		1	BovineHD0100012982	2	1	REC	5/31	38/230	1
1	BTB-01462206	45182041	1	0.05556	0.05166	2	0.7814	1.08		1	BTB-01462206	1	2	DOM	4/32	28/243	0.7775		1	BTB-01462206	1	2	REC	0/36	0/271	1
1	BTB-01462237	45213341	2	0.375	0.441	1	0.313	0.7607		1	BTB-01462237	2	1	DOM	21/15	184/87	0.2629		1	BTB-01462237	2	1	REC	6/30	55/216	0.824
1	BovineHD0100012997	45224996	2	0.5833	0.4792	1	0.1037	1.521		1	BovineHD0100012997	2	1	DOM	30/6	195/70	0.3056		1	BovineHD0100012997	2	1	REC	12/24	59/206	0.1473
1	ARS-BFGL-NGS-68706	45236542	1	0.4444	0.4556	2	0.9002	0.9561		1	ARS-BFGL-NGS-68706	1	2	DOM	23/13	188/82	0.5653		1	ARS-BFGL-NGS-68706	1	2	REC	9/27	58/212	0.6685
1	ARS-BFGL-NGS-113748	45259100	1	0.2917	0.3727	2	0.1941	0.6931		1	ARS-BFGL-NGS-113748	1	2	DOM	18/18	164/107	0.2789		1	ARS-BFGL-NGS-113748	1	2	REC	3/33	38/233	0.4423
1	Hapmap38803-BTA-104250	45281490	1	0.09722	0.1199	2	0.6983	0.7903		1	Hapmap38803-BTA-104250	1	2	DOM	7/29	61/210	0.8317		1	Hapmap38803-BTA-104250	1	2	REC	0/36	4/267	1
1	ARS-BFGL-NGS-119382	45324731	1	0.3472	0.3782	2	0.6978	0.8744		1	ARS-BFGL-NGS-119382	1	2	DOM	21/15	159/112	1		1	ARS-BFGL-NGS-119382	1	2	REC	4/32	46/225	0.4758
1	BTB-00478386	45350130	1	0.375	0.3185	2	0.3501	1.284		1	BTB-00478386	1	2	DOM	21/15	138/132	0.4793		1	BTB-00478386	1	2	REC	6/30	34/236	0.441
1	BTB-00478374	45379246	1	0.3333	0.3204	2	0.8933	1.061		1	BTB-00478374	1	2	DOM	22/14	142/128	0.3769		1	BTB-00478374	1	2	REC	2/34	31/239	0.3961
1	BovineHD0100013052	45386077	1	0.3333	0.3941	2	0.3678	0.7689		1	BovineHD0100013052	1	2	DOM	21/15	166/103	0.718		1	BovineHD0100013052	1	2	REC	3/33	46/223	0.2304
1	ARS-BFGL-NGS-10512	45458660	2	0.5278	0.4779	1	0.4531	1.221		1	ARS-BFGL-NGS-10512	2	1	DOM	27/9	193/78	0.6986		1	ARS-BFGL-NGS-10512	2	1	REC	11/25	66/205	0.418
1	BovineHD0100013081	45476204	1	0.3194	0.3769	2	0.3654	0.776		1	BovineHD0100013081	1	2	DOM	21/15	160/104	0.8565		1	BovineHD0100013081	1	2	REC	2/34	39/225	0.1938
1	BovineHD0100013084	45484321	2	0.1528	0.1468	1	0.8604	1.048		1	BovineHD0100013084	2	1	DOM	11/25	70/199	0.5516		1	BovineHD0100013084	2	1	REC	0/36	9/260	0.6056
1	BTA-90373-no-rs	45519346	1	0.1944	0.2214	2	0.6521	0.8489		1	BTA-90373-no-rs	1	2	DOM	13/23	105/166	0.8561		1	BTA-90373-no-rs	1	2	REC	1/35	15/256	0.704
1	BovineHD0100013097	45544351	1	0.3056	0.2548	2	0.3907	1.287		1	BovineHD0100013097	1	2	DOM	21/15	115/148	0.1104		1	BovineHD0100013097	1	2	REC	1/35	19/244	0.4861
1	ARS-BFGL-NGS-34687	45555607	2	0.4167	0.4207	1	1	0.9837		1	ARS-BFGL-NGS-34687	2	1	DOM	22/14	176/95	0.7118		1	ARS-BFGL-NGS-34687	2	1	REC	8/28	52/219	0.6572
1	BovineHD0100013102	45563997	2	0.4444	0.4356	1	0.8998	1.037		1	BovineHD0100013102	2	1	DOM	24/12	174/90	1		1	BovineHD0100013102	2	1	REC	8/28	56/208	0.8316
1	BTB-01461996	45612781	2	0.4861	0.4539	1	0.6168	1.138		1	BTB-01461996	2	1	DOM	26/10	190/81	0.8488		1	BTB-01461996	2	1	REC	9/27	56/215	0.5213
1	BTA-10863-rs29016414	45773590	2	0.08333	0.04059	1	0.1251	2.149		1	BTA-10863-rs29016414	2	1	DOM	6/30	22/249	0.1174		1	BTA-10863-rs29016414	2	1	REC	0/36	0/271	1
1	BTA-95262-no-rs	45793675	2	0.1806	0.1181	1	0.1327	1.646		1	BTA-95262-no-rs	2	1	DOM	11/25	58/213	0.21		1	BTA-95262-no-rs	2	1	REC	2/34	6/265	0.2386
1	BTB-01786029	45848413	2	0.2222	0.2435	1	0.7704	0.8874		1	BTB-01786029	2	1	DOM	14/22	112/159	0.8579		1	BTB-01786029	2	1	REC	2/34	20/251	1
1	BTA-14361-rs29023125	45897874	1	0.08333	0.04059	2	0.1251	2.149		1	BTA-14361-rs29023125	1	2	DOM	6/30	22/249	0.1174		1	BTA-14361-rs29023125	1	2	REC	0/36	0/271	1
1	ARS-BFGL-NGS-114234	45929427	1	0.1389	0.2019	2	0.2665	0.6378		1	ARS-BFGL-NGS-114234	1	2	DOM	10/26	94/176	0.458		1	ARS-BFGL-NGS-114234	1	2	REC	0/36	15/255	0.2313
1	BTA-89820-no-rs	45967602	2	0.4583	0.452	1	1	1.026		1	BTA-89820-no-rs	2	1	DOM	26/10	184/87	0.7044		1	BTA-89820-no-rs	2	1	REC	7/29	61/210	0.8317
1	Hapmap60140-ss46526251	46016435	2	0.1389	0.2056	1	0.2095	0.6234		1	Hapmap60140-ss46526251	2	1	DOM	10/26	96/174	0.4564		1	Hapmap60140-ss46526251	2	1	REC	0/36	15/255	0.2313
1	BovineHD0100013189	46035686	1	0.1389	0.2034	2	0.2665	0.6316		1	BovineHD0100013189	1	2	DOM	10/26	92/171	0.4567		1	BovineHD0100013189	1	2	REC	0/36	15/248	0.2304
1	UA-IFASA-4106	46048751	2	0.4583	0.4576	1	1	1.003		1	UA-IFASA-4106	2	1	DOM	26/10	187/84	0.8477		1	UA-IFASA-4106	2	1	REC	7/29	61/210	0.8317
1	BovineHD0100013198	46078837	2	0.1389	0.2056	1	0.2095	0.6234		1	BovineHD0100013198	2	1	DOM	10/26	95/175	0.4568		1	BovineHD0100013198	2	1	REC	0/36	16/254	0.2322
1	BTB-00468553	46082337	2	0.08333	0.04059	1	0.1251	2.149		1	BTB-00468553	2	1	DOM	6/30	22/249	0.1174		1	BTB-00468553	2	1	REC	0/36	0/271	1
1	BovineHD0100013203	46103884	1	0.01389	0.06506	2	0.1077	0.2024		1	BovineHD0100013203	1	2	DOM	1/35	35/234	0.09664		1	BovineHD0100013203	1	2	REC	0/36	0/269	1
1	BovineHD0100013207	46124747	2	0.4444	0.4349	1	0.8998	1.039		1	BovineHD0100013207	2	1	DOM	28/8	181/88	0.253		1	BovineHD0100013207	2	1	REC	4/32	53/216	0.2609
1	BTB-00468519	46202802	2	0.2639	0.1734	1	0.07436	1.709		1	BTB-00468519	2	1	DOM	16/20	85/186	0.1323		1	BTB-00468519	2	1	REC	3/33	9/262	0.155
1	ARS-BFGL-NGS-110320	46242001	1	0.3194	0.3574	2	0.6001	0.8439		1	ARS-BFGL-NGS-110320	1	2	DOM	22/14	158/112	0.8577		1	ARS-BFGL-NGS-110320	1	2	REC	1/35	35/235	0.09663
1	ARS-BFGL-NGS-67684	46267521	2	0.25	0.2823	1	0.6749	0.8475		1	ARS-BFGL-NGS-67684	2	1	DOM	17/19	128/143	1		1	ARS-BFGL-NGS-67684	2	1	REC	1/35	25/246	0.3354
1	BTB-00468485	46294957	2	0.1944	0.1218	1	0.09382	1.741		1	BTB-00468485	2	1	DOM	12/24	60/211	0.1456		1	BTB-00468485	2	1	REC	2/34	6/265	0.2386
1	BTB-00468476	46322462	1	0.3889	0.3376	2	0.4285	1.248		1	BTB-00468476	1	2	DOM	23/13	152/119	0.4741		1	BTB-00468476	1	2	REC	5/31	31/240	0.5904
1	BTB-01608930	46425212	1	0.4722	0.3875	2	0.1997	1.415		1	BTB-01608930	1	2	DOM	26/10	169/102	0.2745		1	BTB-01608930	1	2	REC	8/28	41/230	0.3301
1	BovineHD0100013284	46452563	1	0.4722	0.4721	2	1	1		1	BovineHD0100013284	1	2	DOM	24/12	190/79	0.6985		1	BovineHD0100013284	1	2	REC	10/26	64/205	0.6788
1	BovineHD0100013290	46480170	2	0.3889	0.3309	1	0.3538	1.287		1	BovineHD0100013290	2	1	DOM	23/13	149/120	0.3746		1	BovineHD0100013290	2	1	REC	5/31	29/240	0.5735
1	BTA-109011-no-rs	46575158	2	0.1944	0.2196	1	0.7608	0.858		1	BTA-109011-no-rs	2	1	DOM	13/23	102/169	1		1	BTA-109011-no-rs	2	1	REC	1/35	17/254	0.7058
1	Hapmap39710-BTA-108633	46659142	1	0.3611	0.3727	2	0.8972	0.9514		1	Hapmap39710-BTA-108633	1	2	DOM	21/15	164/107	0.8569		1	Hapmap39710-BTA-108633	1	2	REC	5/31	38/233	1
1	Hapmap54262-rs29018839	46735327	2	0.4028	0.3829	1	0.7968	1.087		1	Hapmap54262-rs29018839	2	1	DOM	23/13	169/100	1		1	Hapmap54262-rs29018839	2	1	REC	6/30	37/232	0.6132
1	ARS-BFGL-NGS-41577	46756027	1	0.05556	0.05904	2	1	0.9375		1	ARS-BFGL-NGS-41577	1	2	DOM	4/32	29/242	1		1	ARS-BFGL-NGS-41577	1	2	REC	0/36	3/268	1
1	BovineHD0100013379	46834727	2	0.1944	0.2193	1	0.7607	0.8591		1	BovineHD0100013379	2	1	DOM	12/24	105/164	0.5863		1	BovineHD0100013379	2	1	REC	2/34	13/256	0.6931
1	ARS-BFGL-NGS-23106	46884964	2	0.01389	0.02399	1	1	0.5731		1	ARS-BFGL-NGS-23106	2	1	DOM	1/35	12/259	1		1	ARS-BFGL-NGS-23106	2	1	REC	0/36	1/270	1
1	BovineHD0100013407	46922216	1	0.5278	0.4796	2	0.4541	1.213		1	BovineHD0100013407	1	2	DOM	28/8	191/78	0.4382		1	BovineHD0100013407	1	2	REC	10/26	67/202	0.6869
1	BTA-99040-no-rs	46953687	2	0.02778	0.02583	1	1	1.078		1	BTA-99040-no-rs	2	1	DOM	2/34	14/257	1		1	BTA-99040-no-rs	2	1	REC	0/36	0/271	1
1	BovineHD0100013416	46963727	1	0.25	0.3144	2	0.3401	0.7269		1	BovineHD0100013416	1	2	DOM	17/19	136/128	0.723		1	BovineHD0100013416	1	2	REC	1/35	30/234	0.1471
1	ARS-BFGL-BAC-24524	47022790	2	0.1944	0.2675	1	0.2003	0.6609		1	ARS-BFGL-BAC-24524	2	1	DOM	14/22	122/149	0.5929		1	ARS-BFGL-BAC-24524	2	1	REC	0/36	23/248	0.08918
1	Hapmap55429-rs29012753	47050759	2	0.4167	0.2934	1	0.04107	1.721		1	Hapmap55429-rs29012753	2	1	DOM	26/10	133/138	0.01218		1	Hapmap55429-rs29012753	2	1	REC	4/32	26/245	0.7652
1	BTB-02090792	47079462	2	0.2222	0.3007	1	0.2137	0.6643		1	BTB-02090792	2	1	DOM	16/20	136/135	0.5958		1	BTB-02090792	2	1	REC	0/36	27/244	0.05533
1	BTB-01702372	47112713	2	0.04167	0.06273	1	0.6063	0.6496		1	BTB-01702372	2	1	DOM	3/33	31/240	0.7795		1	BTB-01702372	2	1	REC	0/36	3/268	1
1	BTB-01572184	47157644	1	0.2917	0.1993	2	0.08909	1.655		1	BTB-01572184	1	2	DOM	19/17	96/175	0.06547		1	BTB-01572184	1	2	REC	2/34	12/259	0.6728
1	Hapmap43751-BTA-104783	47185588	2	0.125	0.1052	1	0.5492	1.216		1	Hapmap43751-BTA-104783	2	1	DOM	9/27	55/216	0.5155		1	Hapmap43751-BTA-104783	2	1	REC	0/36	2/269	1
1	BovineHD0100013469	47216446	2	0.2083	0.1648	1	0.4026	1.334		1	BovineHD0100013469	2	1	DOM	15/21	85/185	0.2569		1	BovineHD0100013469	2	1	REC	0/36	4/266	1
1	BTB-01967977	47302352	2	0.2917	0.2232	1	0.2332	1.433		1	BTB-01967977	2	1	DOM	16/20	110/161	0.7195		1	BTB-01967977	2	1	REC	5/31	11/260	0.02802
1	BTB-01663516	47334486	2	0.1111	0.1074	1	0.842	1.039		1	BTB-01663516	2	1	DOM	8/28	54/216	0.8252		1	BTB-01663516	2	1	REC	0/36	4/266	1
1	BovineHD0100013497	47357605	1	0.375	0.3759	2	1	0.9961		1	BovineHD0100013497	1	2	DOM	22/14	161/109	1		1	BovineHD0100013497	1	2	REC	5/31	42/228	1
1	Hapmap42068-BTA-111564	47378821	1	0.2639	0.1863	2	0.1531	1.565		1	Hapmap42068-BTA-111564	1	2	DOM	16/20	93/178	0.2671		1	Hapmap42068-BTA-111564	1	2	REC	3/33	8/263	0.1262
1	BTB-01202368	47421211	1	0.2222	0.2841	2	0.3268	0.7199		1	BTB-01202368	1	2	DOM	15/21	132/139	0.4801		1	BTB-01202368	1	2	REC	1/35	22/249	0.4954
1	BTB-01202377	47439819	2	0.3472	0.3672	1	0.7953	0.9168		1	BTB-01202377	2	1	DOM	21/15	161/110	1		1	BTB-01202377	2	1	REC	4/32	38/233	0.7989
1	BTA-122400-no-rs	47465147	2	0.4861	0.4889	1	1	0.9888		1	BTA-122400-no-rs	2	1	DOM	27/9	198/73	1		1	BTA-122400-no-rs	2	1	REC	8/28	67/204	0.8386
1	Hapmap60003-rs29024905	47489244	2	0.375	0.2934	1	0.1726	1.445		1	Hapmap60003-rs29024905	2	1	DOM	23/13	134/137	0.1131		1	Hapmap60003-rs29024905	2	1	REC	4/32	25/246	0.7602
1	BTB-01202460	47578457	2	0.1667	0.2694	1	0.06322	0.5425		1	BTB-01202460	2	1	DOM	12/24	123/148	0.2116		1	BTB-01202460	2	1	REC	0/36	23/248	0.08918
1	BovineHD0100013544	47593505	2	0.1389	0.1296	1	0.8522	1.083		1	BovineHD0100013544	2	1	DOM	9/27	66/204	1		1	BovineHD0100013544	2	1	REC	1/35	4/266	0.4675
1	Hapmap27230-BTA-162491	47606699	2	0.4167	0.4871	1	0.3152	0.7522		1	Hapmap27230-BTA-162491	2	1	DOM	26/10	202/69	0.8393		1	Hapmap27230-BTA-162491	2	1	REC	4/32	62/209	0.1316
1	ARS-BFGL-NGS-105365	47660239	1	0.09722	0.07011	2	0.4669	1.428		1	ARS-BFGL-NGS-105365	1	2	DOM	7/29	37/234	0.3216		1	ARS-BFGL-NGS-105365	1	2	REC	0/36	1/270	1
1	ARS-BFGL-NGS-73983	47740633	2	0.5	0.4705	1	0.7066	1.125		1	ARS-BFGL-NGS-73983	2	1	DOM	25/11	187/84	1		1	ARS-BFGL-NGS-73983	2	1	REC	11/25	68/203	0.5428
1	ARS-BFGL-BAC-16973	47765383	2	0.4861	0.393	1	0.1593	1.461		1	ARS-BFGL-BAC-16973	2	1	DOM	26/10	171/100	0.356		1	ARS-BFGL-BAC-16973	2	1	REC	9/27	42/229	0.1561
1	Hapmap49948-BTA-29490	47815773	1	0.09722	0.1181	2	0.6986	0.8043		1	Hapmap49948-BTA-29490	1	2	DOM	7/29	60/211	0.8319		1	Hapmap49948-BTA-29490	1	2	REC	0/36	4/267	1
1	ARS-BFGL-NGS-50906	47982861	1	0.2222	0.3229	2	0.1034	0.5992		1	ARS-BFGL-NGS-50906	1	2	DOM	14/22	144/127	0.1142		1	ARS-BFGL-NGS-50906	1	2	REC	2/34	31/240	0.3962
1	BovineHD0100013667	48012415	1	0.02857	0.05283	2	0.5618	0.5273		1	BovineHD0100013667	1	2	DOM	2/33	28/237	0.551		1	BovineHD0100013667	1	2	REC	0/35	0/265	1
1	Hapmap59092-rs29024583	48061029	2	0.1528	0.1808	1	0.6257	0.817		1	Hapmap59092-rs29024583	2	1	DOM	11/25	89/182	0.8518		1	Hapmap59092-rs29024583	2	1	REC	0/36	9/262	0.6054
1	BovineHD0100013692	48117247	1	0.1528	0.1513	2	1	1.012		1	BovineHD0100013692	1	2	DOM	11/25	76/195	0.8441		1	BovineHD0100013692	1	2	REC	0/36	6/265	1
1	ARS-BFGL-NGS-41264	48157004	2	0.04167	0.03321	1	0.7266	1.266		1	ARS-BFGL-NGS-41264	2	1	DOM	3/33	18/253	0.723		1	ARS-BFGL-NGS-41264	2	1	REC	0/36	0/271	1
1	Hapmap38806-BTA-110152	48263748	2	0.06944	0.1074	1	0.4109	0.6202		1	Hapmap38806-BTA-110152	2	1	DOM	5/31	56/214	0.3844		1	Hapmap38806-BTA-110152	2	1	REC	0/36	2/268	1
1	BovineHD0100013736	48268016	2	0.08333	0.1222	1	0.4368	0.6529		1	BovineHD0100013736	2	1	DOM	6/30	63/207	0.5239		1	BovineHD0100013736	2	1	REC	0/36	3/267	1
1	BTB-01146938	48360337	1	0.4028	0.3444	2	0.3583	1.284		1	BTB-01146938	1	2	DOM	24/12	150/120	0.2166		1	BTB-01146938	1	2	REC	5/31	36/234	1
1	BovineHD0100013762	48425332	2	0.1143	0.1623	1	0.382	0.6662		1	BovineHD0100013762	2	1	DOM	8/27	77/188	0.5511		1	BovineHD0100013762	2	1	REC	0/35	9/256	0.6051
1	BTB-01146838	48436492	1	0.3611	0.369	2	1	0.9665		1	BTB-01146838	1	2	DOM	22/14	165/106	1		1	BTB-01146838	1	2	REC	4/32	35/236	1
1	Hapmap50572-BTA-113037	48500613	1	0.3889	0.4317	2	0.5277	0.8376		1	Hapmap50572-BTA-113037	1	2	DOM	21/15	176/95	0.4624		1	Hapmap50572-BTA-113037	1	2	REC	7/29	58/213	1
1	ARS-BFGL-NGS-83459	48538897	2	0.1806	0.1328	1	0.2766	1.438		1	ARS-BFGL-NGS-83459	2	1	DOM	12/24	67/204	0.3101		1	ARS-BFGL-NGS-83459	2	1	REC	1/35	5/266	0.53
1	BovineHD0100013844	48713582	1	0.4167	0.4204	2	1	0.9849		1	BovineHD0100013844	1	2	DOM	21/15	173/97	0.5811		1	BovineHD0100013844	1	2	REC	9/27	54/216	0.5114
1	BovineHD0100013846	48715780	1	0.4167	0.4204	2	1	0.9849		1	BovineHD0100013846	1	2	DOM	21/15	173/97	0.5811		1	BovineHD0100013846	1	2	REC	9/27	54/216	0.5114
1	BovineHD0100013848	48724388	2	0.3971	0.4264	1	0.6968	0.8858		1	BovineHD0100013848	2	1	DOM	19/15	172/93	0.3444		1	BovineHD0100013848	2	1	REC	8/26	54/211	0.6564
1	BovineHD0100013866	48752114	1	0.4265	0.3947	2	0.6933	1.14		1	BovineHD0100013866	1	2	DOM	21/13	162/104	1		1	BovineHD0100013866	1	2	REC	8/26	48/218	0.4828
1	BovineHD0100013867	48755603	2	0.2059	0.1283	1	0.09137	1.761		1	BovineHD0100013867	2	1	DOM	11/23	61/204	0.2855		1	BovineHD0100013867	2	1	REC	3/31	7/258	0.09238
1	BTA-113021-no-rs	48823158	1	0.4167	0.4667	2	0.4521	0.8163		1	BTA-113021-no-rs	1	2	DOM	24/12	192/78	0.5651		1	BTA-113021-no-rs	1	2	REC	6/30	60/210	0.5239
1	BovineHD0100013906	48843312	1	0.3	0.2224	2	0.1739	1.498		1	BovineHD0100013906	1	2	DOM	17/18	98/165	0.2017		1	BovineHD0100013906	1	2	REC	4/31	19/244	0.3277
1	BTB-01077379	48869448	2	0.3889	0.4244	1	0.6125	0.8632		1	BTB-01077379	2	1	DOM	22/14	178/93	0.5819		1	BTB-01077379	2	1	REC	6/30	52/219	0.8239
1	BovineHD0100013920	48904277	1	0.4118	0.4436	2	0.6975	0.878		1	BovineHD0100013920	1	2	DOM	20/14	180/86	0.3359		1	BovineHD0100013920	1	2	REC	8/26	56/210	0.824
1	BTB-01077277	48906977	2	0.4167	0.437	1	0.8008	0.9201		1	BTB-01077277	2	1	DOM	21/15	180/90	0.3523		1	BTB-01077277	2	1	REC	9/27	56/214	0.5226
1	Hapmap57446-rs29023998	48981871	2	0.04412	0.03148	1	0.4809	1.42		1	Hapmap57446-rs29023998	2	1	DOM	3/31	17/253	0.4778		1	Hapmap57446-rs29023998	2	1	REC	0/34	0/270	1
1	BovineHD0100013943	49011657	1	0.4706	0.5	2	0.7001	0.8889		1	BovineHD0100013943	1	2	DOM	24/10	195/73	0.8389		1	BovineHD0100013943	1	2	REC	8/26	73/195	0.8373
1	BTB-01615915	49314301	1	0.3194	0.2657	2	0.3275	1.297		1	BTB-01615915	1	2	DOM	18/18	123/148	0.7223		1	BTB-01615915	1	2	REC	5/31	21/250	0.2075
1	BovineHD0100014023	49415050	1	0.4265	0.4347	2	1	0.967		1	BovineHD0100014023	1	2	DOM	25/9	185/83	0.6945		1	BovineHD0100014023	1	2	REC	4/30	48/220	0.4745
1	BovineHD0100014048	49515972	2	0.3529	0.2857	1	0.2597	1.364		1	BovineHD0100014048	2	1	DOM	22/12	129/137	0.1004		1	BovineHD0100014048	2	1	REC	2/32	23/243	0.7516
1	BovineHD0100014053	49537293	2	0.1912	0.1491	1	0.3727	1.349		1	BovineHD0100014053	2	1	DOM	10/24	71/194	0.8377		1	BovineHD0100014053	2	1	REC	3/31	8/257	0.1173
1	BovineHD0100014063	49597814	2	0.2794	0.2519	1	0.658	1.152		1	BovineHD0100014063	2	1	DOM	18/16	118/150	0.363		1	BovineHD0100014063	2	1	REC	1/33	17/251	0.7043
1	BovineHD0100014071	49634079	2	0.1765	0.1748	1	1	1.012		1	BovineHD0100014071	2	1	DOM	12/22	84/182	0.6978		1	BovineHD0100014071	2	1	REC	0/34	9/257	0.6045
1	BTB-00132601	49688088	1	0.2206	0.1926	2	0.6264	1.187		1	BTB-00132601	1	2	DOM	14/20	94/176	0.4548		1	BTB-00132601	1	2	REC	1/33	10/260	1
1	BovineHD0100014103	49728052	1	0.2206	0.1623	2	0.2304	1.461		1	BovineHD0100014103	1	2	DOM	13/21	80/185	0.333		1	BovineHD0100014103	1	2	REC	2/32	6/259	0.2274
1	ARS-BFGL-NGS-38261	49729236	2	0.4306	0.3537	1	0.24	1.382		1	ARS-BFGL-NGS-38261	2	1	DOM	26/10	159/111	0.1479		1	ARS-BFGL-NGS-38261	2	1	REC	5/31	32/238	0.7846
1	ARS-BFGL-BAC-15402	49762136	1	0.2222	0.19	2	0.5264	1.218		1	ARS-BFGL-BAC-15402	1	2	DOM	15/21	94/177	0.4597		1	ARS-BFGL-BAC-15402	1	2	REC	1/35	9/262	1
1	BTB-00132817	49799340	1	0.4412	0.3537	2	0.181	1.443		1	BTB-00132817	1	2	DOM	25/9	159/111	0.1356		1	BTB-00132817	1	2	REC	5/29	32/238	0.5831
1	BTB-01699628	49829799	2	0.2206	0.163	1	0.2322	1.454		1	BTB-01699628	2	1	DOM	13/21	82/188	0.4322		1	BTB-01699628	2	1	REC	2/32	6/264	0.2216
1	BTA-114651-no-rs	49851536	2	0.4861	0.417	1	0.3102	1.323		1	BTA-114651-no-rs	2	1	DOM	28/8	181/90	0.2531		1	BTA-114651-no-rs	2	1	REC	7/29	45/226	0.6401
1	Hapmap41715-BTA-100026	49919784	2	0.2361	0.1511	1	0.08592	1.736		1	Hapmap41715-BTA-100026	2	1	DOM	14/22	77/191	0.2452		1	Hapmap41715-BTA-100026	2	1	REC	3/33	4/264	0.03831
1	BTB-00022097	50009545	2	0.25	0.1771	1	0.1468	1.549		1	BTB-00022097	2	1	DOM	16/20	89/182	0.1917		1	BTB-00022097	2	1	REC	2/34	7/264	0.2851
1	BTB-01165120	50064432	1	0.1912	0.1241	2	0.1288	1.669		1	BTB-01165120	1	2	DOM	11/23	64/202	0.2976		1	BTB-01165120	1	2	REC	2/32	2/264	0.06473
1	Hapmap49829-BTA-101896	50173554	2	0.3611	0.3463	1	0.7938	1.067		1	Hapmap49829-BTA-101896	2	1	DOM	22/14	154/116	0.7212		1	Hapmap49829-BTA-101896	2	1	REC	4/32	33/237	1
1	BovineHD0100014237	50241095	2	0.08824	0.08083	1	0.8142	1.101		1	BovineHD0100014237	2	1	DOM	5/29	42/224	1		1	BovineHD0100014237	2	1	REC	1/33	1/265	0.2142
1	BTB-01164952	50252416	1	0.05882	0.06111	2	1	0.9602		1	BTB-01164952	1	2	DOM	4/30	33/237	1		1	BTB-01164952	1	2	REC	0/34	0/270	1
1	BTB-01164946	50279694	2	0.4861	0.4704	1	0.8031	1.065		1	BTB-01164946	2	1	DOM	27/9	191/79	0.6972		1	BTB-01164946	2	1	REC	8/28	63/207	1
1	BTB-01164879	50375545	2	0.1029	0.09815	1	0.831	1.054		1	BTB-01164879	2	1	DOM	7/27	49/221	0.8141		1	BTB-01164879	2	1	REC	0/34	4/266	1
1	BTB-00022352	50415732	1	0.1667	0.1074	2	0.1649	1.662		1	BTB-00022352	1	2	DOM	9/27	53/217	0.5074		1	BTB-00022352	1	2	REC	3/33	5/265	0.0554
1	BovineHD0100014288	50443160	1	0.4444	0.4111	2	0.612	1.146		1	BovineHD0100014288	1	2	DOM	25/11	171/99	0.5801		1	BovineHD0100014288	1	2	REC	7/29	51/219	1
1	BTB-00022376	50457230	1	0.06944	0.07963	2	1	0.8625		1	BTB-00022376	1	2	DOM	5/31	41/229	1		1	BTB-00022376	1	2	REC	0/36	2/268	1
1	Hapmap41716-BTA-100042	50484660	1	0.3472	0.2823	2	0.2697	1.352		1	Hapmap41716-BTA-100042	1	2	DOM	21/15	132/139	0.2929		1	Hapmap41716-BTA-100042	1	2	REC	4/32	21/250	0.5131
1	BovineHD0100014306	50493683	2	0.3636	0.2906	1	0.2537	1.395		1	BovineHD0100014306	2	1	DOM	20/13	133/132	0.2742		1	BovineHD0100014306	2	1	REC	4/29	21/244	0.4999
1	BovineHD0100014307	50494779	2	0.3636	0.2822	1	0.1956	1.453		1	BovineHD0100014307	2	1	DOM	20/13	128/136	0.2016		1	BovineHD0100014307	2	1	REC	4/29	21/243	0.5004
1	ARS-BFGL-NGS-101533	50631100	2	0.3611	0.4	1	0.6081	0.8478		1	ARS-BFGL-NGS-101533	2	1	DOM	22/14	165/105	1		1	ARS-BFGL-NGS-101533	2	1	REC	4/32	51/219	0.3556
1	BovineHD0100014362	50665945	2	0.3714	0.3667	1	1	1.021		1	BovineHD0100014362	2	1	DOM	21/14	154/116	0.8563		1	BovineHD0100014362	2	1	REC	5/30	44/226	1
1	ARS-BFGL-NGS-6521	50767507	2	0.05714	0.02778	1	0.2586	2.121		1	ARS-BFGL-NGS-6521	2	1	DOM	4/31	15/255	0.2518		1	ARS-BFGL-NGS-6521	2	1	REC	0/35	0/270	1
1	ARS-BFGL-NGS-14638	50809694	2	0.09722	0.09142	1	0.8291	1.07		1	ARS-BFGL-NGS-14638	2	1	DOM	6/30	47/221	1		1	ARS-BFGL-NGS-14638	2	1	REC	1/35	2/266	0.3158
1	Hapmap42747-BTA-97910	50856429	2	0.4167	0.3303	1	0.1479	1.449		1	Hapmap42747-BTA-97910	2	1	DOM	25/11	151/120	0.1512		1	Hapmap42747-BTA-97910	2	1	REC	5/31	28/243	0.5644
1	BTB-00184675	50886644	2	0.2778	0.2332	1	0.4612	1.265		1	BTB-00184675	2	1	DOM	18/18	112/156	0.3737		1	BTB-00184675	2	1	REC	2/34	13/255	0.6941
1	ARS-BFGL-NGS-27696	50927543	2	0.1111	0.06852	1	0.2248	1.699		1	ARS-BFGL-NGS-27696	2	1	DOM	8/28	36/234	0.2017		1	ARS-BFGL-NGS-27696	2	1	REC	0/36	1/269	1
1	ARS-BFGL-NGS-15670	50974257	2	0.375	0.4207	1	0.5251	0.8263		1	ARS-BFGL-NGS-15670	2	1	DOM	22/14	178/93	0.5819		1	ARS-BFGL-NGS-15670	2	1	REC	5/31	50/221	0.6458
1	BovineHD0100014436	50978540	1	0.2714	0.2593	2	0.885	1.064		1	BovineHD0100014436	1	2	DOM	16/19	116/152	0.8568		1	BovineHD0100014436	1	2	REC	3/32	23/245	1
1	BTB-01661970	51001448	2	0.3333	0.4241	1	0.1616	0.679		1	BTB-01661970	2	1	DOM	20/16	181/89	0.1927		1	BTB-01661970	2	1	REC	4/32	48/222	0.4775
1	BovineHD0100014490	51157870	1	0.4242	0.5	2	0.2963	0.7368		1	BovineHD0100014490	1	2	DOM	22/11	200/65	0.2921		1	BovineHD0100014490	1	2	REC	6/27	65/200	0.5191
1	ARS-BFGL-NGS-80227	51199296	2	0.5	0.4982	1	1	1.007		1	ARS-BFGL-NGS-80227	2	1	DOM	28/8	205/66	1		1	ARS-BFGL-NGS-80227	2	1	REC	8/28	65/206	1
1	BovineHD0100014505	51226374	1	0.2941	0.2387	2	0.3685	1.329		1	BovineHD0100014505	1	2	DOM	17/17	113/153	0.4638		1	BovineHD0100014505	1	2	REC	3/31	14/252	0.4221
1	BTB-01303321	51253635	1	0.1111	0.1241	2	0.8503	0.8825		1	BTB-01303321	1	2	DOM	8/28	64/206	1		1	BTB-01303321	1	2	REC	0/36	3/267	1
1	UA-IFASA-6260	51319043	2	0.125	0.1698	1	0.3996	0.6986		1	UA-IFASA-6260	2	1	DOM	9/27	82/186	0.5649		1	UA-IFASA-6260	2	1	REC	0/36	9/259	0.6057
1	Hapmap54644-rs29022483	51443154	1	0.25	0.2944	2	0.4906	0.7987		1	Hapmap54644-rs29022483	1	2	DOM	17/19	130/140	1		1	Hapmap54644-rs29022483	1	2	REC	1/35	29/241	0.2271
1	BTA-100081-no-rs	51501180	2	0.25	0.2759	1	0.7783	0.8747		1	BTA-100081-no-rs	2	1	DOM	15/21	123/147	0.7233		1	BTA-100081-no-rs	2	1	REC	3/33	26/244	1
1	BovineHD0100014595	51600068	2	0.1176	0.109	1	0.8368	1.09		1	BovineHD0100014595	2	1	DOM	6/28	55/211	0.8226		1	BovineHD0100014595	2	1	REC	2/32	3/263	0.1003
1	BTA-100076-no-rs	51629454	2	0.375	0.286	1	0.1314	1.498		1	BTA-100076-no-rs	2	1	DOM	24/12	133/138	0.05223		1	BTA-100076-no-rs	2	1	REC	3/33	22/249	1
1	ARS-BFGL-NGS-29536	51674103	1	0.4167	0.3247	2	0.1435	1.485		1	ARS-BFGL-NGS-29536	1	2	DOM	25/11	146/125	0.1071		1	ARS-BFGL-NGS-29536	1	2	REC	5/31	30/241	0.5805
1	ARS-BFGL-NGS-26781	51729431	2	0.25	0.2037	1	0.3576	1.303		1	ARS-BFGL-NGS-26781	2	1	DOM	16/20	99/171	0.3665		1	ARS-BFGL-NGS-26781	2	1	REC	2/34	11/259	0.6558
1	BTA-27925-no-rs	51785197	1	0.3194	0.25	2	0.2506	1.408		1	BTA-27925-no-rs	1	2	DOM	20/16	116/152	0.2112		1	BTA-27925-no-rs	1	2	REC	3/33	18/250	0.7245
1	BovineHD0100014666	51793463	1	0.3143	0.3139	2	1	1.002		1	BovineHD0100014666	1	2	DOM	18/17	137/129	1		1	BovineHD0100014666	1	2	REC	4/31	30/236	1
1	Hapmap23148-BTA-123974	51845190	2	0.3194	0.2611	1	0.3216	1.328		1	Hapmap23148-BTA-123974	2	1	DOM	20/16	125/145	0.3746		1	Hapmap23148-BTA-123974	2	1	REC	3/33	16/254	0.4773
1	BovineHD0100014707	51942049	1	0.3382	0.3528	2	0.893	0.9375		1	BovineHD0100014707	1	2	DOM	20/14	156/109	1		1	BovineHD0100014707	1	2	REC	3/31	31/234	0.7794
1	BovineHD0100014714	51960243	2	0.1029	0.07008	1	0.3244	1.523		1	BovineHD0100014714	2	1	DOM	6/28	36/228	0.5989		1	BovineHD0100014714	2	1	REC	1/33	1/263	0.2155
1	UA-IFASA-5103	51980212	1	0.4028	0.3616	2	0.5165	1.191		1	UA-IFASA-5103	1	2	DOM	21/15	157/114	1		1	UA-IFASA-5103	1	2	REC	8/28	39/232	0.222
1	ARS-BFGL-NGS-105123	52001408	1	0.3333	0.2944	2	0.4958	1.198		1	ARS-BFGL-NGS-105123	1	2	DOM	22/14	135/135	0.2202		1	ARS-BFGL-NGS-105123	1	2	REC	2/34	24/246	0.7515
1	ARS-BFGL-NGS-17305	52078062	1	0.02941	0.009328	2	0.181	3.218		1	ARS-BFGL-NGS-17305	1	2	DOM	2/32	5/263	0.1803		1	ARS-BFGL-NGS-17305	1	2	REC	0/34	0/268	1
1	Hapmap42392-BTA-100065	52121657	1	0.25	0.213	2	0.4511	1.232		1	Hapmap42392-BTA-100065	1	2	DOM	16/20	102/168	0.469		1	Hapmap42392-BTA-100065	1	2	REC	2/34	13/257	0.6922
1	ARS-BFGL-NGS-112553	52229363	2	0.1667	0.1333	1	0.4652	1.3		1	ARS-BFGL-NGS-112553	2	1	DOM	12/24	68/202	0.315		1	ARS-BFGL-NGS-112553	2	1	REC	0/36	4/266	1
1	BTA-100060-no-rs	52260898	1	0.25	0.2093	2	0.4451	1.26		1	BTA-100060-no-rs	1	2	DOM	16/20	105/165	0.5873		1	BTA-100060-no-rs	1	2	REC	2/34	8/262	0.3329
1	BTA-100058-no-rs	52304155	2	0.4722	0.413	1	0.3742	1.272		1	BTA-100058-no-rs	2	1	DOM	28/8	181/89	0.2528		1	BTA-100058-no-rs	2	1	REC	6/30	42/228	0.81
1	BovineHD0100014814	52357886	1	0.4118	0.3741	2	0.5958	1.171		1	BovineHD0100014814	1	2	DOM	22/12	161/105	0.7112		1	BovineHD0100014814	1	2	REC	6/28	38/228	0.6076
1	BovineHD0100014824	52376933	1	0.1571	0.1093	2	0.2339	1.52		1	BovineHD0100014824	1	2	DOM	10/25	58/212	0.3877		1	BovineHD0100014824	1	2	REC	1/34	1/269	0.2167
1	BTA-120739-no-rs	52386165	2	0.25	0.2	1	0.3517	1.333		1	BTA-120739-no-rs	2	1	DOM	15/21	100/170	0.5879		1	BTA-120739-no-rs	2	1	REC	3/33	8/262	0.1272
1	BovineHD0100014833	52401002	2	0.4412	0.5	1	0.3705	0.7895		1	BovineHD0100014833	2	1	DOM	23/11	201/63	0.2947		1	BovineHD0100014833	2	1	REC	7/27	63/201	0.8306
1	ARS-BFGL-NGS-89588	52418784	2	0.3056	0.2417	1	0.2475	1.38		1	ARS-BFGL-NGS-89588	2	1	DOM	19/17	119/152	0.3735		1	ARS-BFGL-NGS-89588	2	1	REC	3/33	12/259	0.3982
1	BTB-00026002	52459222	1	0.2778	0.2232	2	0.2993	1.338		1	BTB-00026002	1	2	DOM	17/19	109/162	0.4725		1	BTB-00026002	1	2	REC	3/33	12/259	0.3982
1	ARS-BFGL-NGS-76469	52536112	1	0.5139	0.4704	2	0.5308	1.19		1	ARS-BFGL-NGS-76469	1	2	DOM	27/9	197/73	1		1	ARS-BFGL-NGS-76469	1	2	REC	10/26	57/213	0.3917
1	BovineHD0100014899	52543921	2	0.3676	0.3736	1	1	0.9749		1	BovineHD0100014899	2	1	DOM	21/13	161/104	1		1	BovineHD0100014899	2	1	REC	4/30	37/228	1
1	BovineHD0100014918	52602161	1	0.4714	0.4179	2	0.4409	1.242		1	BovineHD0100014918	1	2	DOM	24/11	175/93	0.8502		1	BovineHD0100014918	1	2	REC	9/26	49/219	0.359
1	Hapmap27147-BTA-124015	52668291	1	0.25	0.2019	2	0.3543	1.318		1	Hapmap27147-BTA-124015	1	2	DOM	17/19	100/170	0.2744		1	Hapmap27147-BTA-124015	1	2	REC	1/35	9/261	1
1	Hapmap24136-BTA-124014	52692977	2	0.5139	0.4815	1	0.618	1.138		1	Hapmap24136-BTA-124014	2	1	DOM	28/8	200/71	0.689		1	Hapmap24136-BTA-124014	2	1	REC	9/27	61/210	0.8325
1	BovineHD0100014953	52773325	1	0.4706	0.3806	2	0.1867	1.447		1	BovineHD0100014953	1	2	DOM	26/8	170/98	0.1812		1	BovineHD0100014953	1	2	REC	6/28	34/234	0.422
1	BovineHD0100014988	52848948	1	0.3	0.265	2	0.5668	1.188		1	BovineHD0100014988	1	2	DOM	19/16	126/140	0.4756		1	BovineHD0100014988	1	2	REC	2/33	15/251	1
1	Hapmap47502-BTA-110302	52854500	2	0.125	0.1494	1	0.7231	0.8131		1	Hapmap47502-BTA-110302	2	1	DOM	9/27	75/196	0.8437		1	Hapmap47502-BTA-110302	2	1	REC	0/36	6/265	1
1	BovineHD0100014992	52855378	2	0.1324	0.1523	1	0.8567	0.8493		1	BovineHD0100014992	2	1	DOM	9/25	75/191	1		1	BovineHD0100014992	2	1	REC	0/34	6/260	1
1	BovineHD0100015002	52889663	2	0.06944	0.09074	1	0.6629	0.7478		1	BovineHD0100015002	2	1	DOM	5/31	48/222	0.6474		1	BovineHD0100015002	2	1	REC	0/36	1/269	1
1	BTB-00025197	52972214	1	0.3333	0.3537	2	0.7935	0.9136		1	BTB-00025197	1	2	DOM	21/15	152/118	0.8596		1	BTB-00025197	1	2	REC	3/33	39/231	0.4416
1	BovineHD0100015037	52999235	1	0.07353	0.09211	2	0.8219	0.7823		1	BovineHD0100015037	1	2	DOM	5/29	48/218	0.8122		1	BovineHD0100015037	1	2	REC	0/34	1/265	1
1	BTB-00025135	53112780	2	0.02778	0.06296	1	0.2962	0.4252		1	BTB-00025135	2	1	DOM	2/34	34/236	0.2803		1	BTB-00025135	2	1	REC	0/36	0/270	1
1	Hapmap47174-BTA-110289	53135919	2	0.1528	0.1185	1	0.4427	1.341		1	Hapmap47174-BTA-110289	2	1	DOM	10/26	63/207	0.5379		1	Hapmap47174-BTA-110289	2	1	REC	1/35	1/269	0.2218
1	BTA-110282-no-rs	53167139	2	0.3056	0.2389	1	0.2441	1.402		1	BTA-110282-no-rs	2	1	DOM	17/19	111/159	0.59		1	BTA-110282-no-rs	2	1	REC	5/31	18/252	0.1672
1	ARS-BFGL-NGS-18743	53214714	2	0.375	0.3653	1	0.8968	1.042		1	ARS-BFGL-NGS-18743	2	1	DOM	22/14	161/110	1		1	ARS-BFGL-NGS-18743	2	1	REC	5/31	37/234	1
1	Hapmap53221-rs29019635	53551793	2	0.375	0.3489	1	0.6941	1.12		1	Hapmap53221-rs29019635	2	1	DOM	22/14	155/113	0.8574		1	Hapmap53221-rs29019635	2	1	REC	5/31	32/236	0.7853
1	Hapmap57738-rs29023662	53578419	2	0.2222	0.1586	1	0.1786	1.516		1	Hapmap57738-rs29023662	2	1	DOM	13/23	77/191	0.4366		1	Hapmap57738-rs29023662	2	1	REC	3/33	8/260	0.1291
1	Hapmap48975-BTA-99363	53615323	2	0.3056	0.2519	1	0.3194	1.307		1	Hapmap48975-BTA-99363	2	1	DOM	18/18	125/145	0.724		1	Hapmap48975-BTA-99363	2	1	REC	4/32	11/259	0.08538
1	BovineHD0100015213	53617929	2	0.4429	0.4173	1	0.7007	1.11		1	BovineHD0100015213	2	1	DOM	21/14	173/93	0.5765		1	BovineHD0100015213	2	1	REC	10/25	49/217	0.1743
1	ARS-BFGL-BAC-20881	53635724	1	0.3194	0.2926	2	0.6804	1.135		1	ARS-BFGL-BAC-20881	1	2	DOM	19/17	129/141	0.5985		1	ARS-BFGL-BAC-20881	1	2	REC	4/32	29/241	1
1	Hapmap61117-rs29023044	53657839	1	0.3429	0.2722	2	0.2574	1.395		1	Hapmap61117-rs29023044	1	2	DOM	22/13	127/143	0.105		1	Hapmap61117-rs29023044	1	2	REC	2/33	20/250	1
1	BovineHD0100015234	53682452	2	0.3529	0.2717	1	0.1964	1.462		1	BovineHD0100015234	2	1	DOM	22/12	125/140	0.06809		1	BovineHD0100015234	2	1	REC	2/32	19/246	1
1	BovineHD0100015235	53683724	2	0.3235	0.2632	1	0.3106	1.339		1	BovineHD0100015235	2	1	DOM	21/13	123/143	0.1021		1	BovineHD0100015235	2	1	REC	1/33	17/249	0.7044
1	BovineHD0100015236	53684659	1	0.3235	0.2632	2	0.3106	1.339		1	BovineHD0100015236	1	2	DOM	21/13	123/143	0.1021		1	BovineHD0100015236	1	2	REC	1/33	17/249	0.7044
1	BTB-00026752	53685613	2	0.3194	0.2934	1	0.6808	1.131		1	BTB-00026752	2	1	DOM	19/17	130/141	0.5998		1	BTB-00026752	2	1	REC	4/32	29/242	1
1	ARS-BFGL-NGS-106380	53713808	1	0.3472	0.2657	2	0.1605	1.47		1	ARS-BFGL-NGS-106380	1	2	DOM	20/16	125/146	0.2936		1	ARS-BFGL-NGS-106380	1	2	REC	5/31	19/252	0.1782
1	BovineHD0100015260	53749809	2	0.3676	0.344	1	0.6873	1.109		1	BovineHD0100015260	2	1	DOM	20/14	149/117	0.855		1	BovineHD0100015260	2	1	REC	5/29	34/232	0.7861
1	BovineHD0100015261	53750481	2	0.4118	0.438	1	0.6991	0.8983		1	BovineHD0100015261	2	1	DOM	21/13	183/83	0.4373		1	BovineHD0100015261	2	1	REC	7/27	50/216	0.8171
1	BTB-00026585	53760822	1	0.04167	0.03321	2	0.7266	1.266		1	BTB-00026585	1	2	DOM	3/33	18/253	0.723		1	BTB-00026585	1	2	REC	0/36	0/271	1
1	BTA-110335-no-rs	53841380	2	0.3889	0.393	1	1	0.9829		1	BTA-110335-no-rs	2	1	DOM	21/15	167/104	0.7186		1	BTA-110335-no-rs	2	1	REC	7/29	46/225	0.6463
1	Hapmap38807-BTA-110324	53899179	2	0.3611	0.3432	1	0.7925	1.082		1	Hapmap38807-BTA-110324	2	1	DOM	20/16	151/120	1		1	Hapmap38807-BTA-110324	2	1	REC	6/30	35/236	0.6004
1	ARS-BFGL-NGS-40967	53953481	2	0.4167	0.417	1	1	0.9987		1	ARS-BFGL-NGS-40967	2	1	DOM	22/14	177/94	0.7107		1	ARS-BFGL-NGS-40967	2	1	REC	8/28	49/222	0.5026
1	Hapmap42092-BTA-119864	54101343	1	0.125	0.1255	2	1	0.9958		1	Hapmap42092-BTA-119864	1	2	DOM	8/28	66/205	1		1	Hapmap42092-BTA-119864	1	2	REC	1/35	2/269	0.313
1	ARS-BFGL-NGS-114712	54134361	2	0.4583	0.441	1	0.8016	1.073		1	ARS-BFGL-NGS-114712	2	1	DOM	23/13	185/86	0.5758		1	ARS-BFGL-NGS-114712	2	1	REC	10/26	54/217	0.2791
1	BovineHD0100015376	54170162	2	0.09722	0.1426	1	0.3637	0.6476		1	BovineHD0100015376	2	1	DOM	6/30	70/200	0.3048		1	BovineHD0100015376	2	1	REC	1/35	7/263	1
1	Hapmap49009-BTA-107212	54263653	2	0.1944	0.1974	1	1	0.9813		1	Hapmap49009-BTA-107212	2	1	DOM	13/23	98/173	1		1	Hapmap49009-BTA-107212	2	1	REC	1/35	9/262	1
1	BovineHD0100015401	54273282	2	0.2639	0.1852	1	0.1152	1.577		1	BovineHD0100015401	2	1	DOM	18/18	86/184	0.03902		1	BovineHD0100015401	2	1	REC	1/35	14/256	1
1	ARS-BFGL-NGS-43783	54347232	2	0.3333	0.2343	1	0.07991	1.634		1	ARS-BFGL-NGS-43783	2	1	DOM	19/17	114/157	0.2828		1	ARS-BFGL-NGS-43783	2	1	REC	5/31	13/258	0.04598
1	BovineHD0100015437	54394177	1	0.2222	0.145	2	0.1156	1.685		1	BovineHD0100015437	1	2	DOM	15/21	73/196	0.07958		1	BovineHD0100015437	1	2	REC	1/35	5/264	0.5325
1	BTB-01712147	54417168	2	0.2083	0.3616	1	0.01164	0.4646		1	BTB-01712147	2	1	DOM	13/23	162/109	0.01127		1	BTB-01712147	2	1	REC	2/34	34/237	0.2806
1	BTB-01315615	54445733	2	0.01389	0.01476	1	1	0.9401		1	BTB-01315615	2	1	DOM	1/35	8/263	1		1	BTB-01315615	2	1	REC	0/36	0/271	1
1	BovineHD0100015457	54450675	2	0.2361	0.1685	1	0.1866	1.525		1	BovineHD0100015457	2	1	DOM	15/21	83/187	0.1891		1	BovineHD0100015457	2	1	REC	2/34	8/262	0.3329
1	BTA-21826-no-rs	54530063	2	0.5556	0.4151	1	0.03082	1.761		1	BTA-21826-no-rs	2	1	DOM	30/6	176/95	0.03642		1	BTA-21826-no-rs	2	1	REC	10/26	49/222	0.1784
1	ARS-BFGL-NGS-86970	54568552	2	0.2083	0.09779	1	0.008672	2.428		1	ARS-BFGL-NGS-86970	2	1	DOM	14/22	52/219	0.01558		1	ARS-BFGL-NGS-86970	2	1	REC	1/35	1/270	0.2211
1	BTB-01315516	54638306	1	0.2361	0.2232	2	0.7661	1.075		1	BTB-01315516	1	2	DOM	15/21	106/165	0.8563		1	BTB-01315516	1	2	REC	2/34	15/256	1
1	BovineHD0100015507	54652115	2	0.4444	0.3481	1	0.1177	1.498		1	BovineHD0100015507	2	1	DOM	25/11	153/117	0.155		1	BovineHD0100015507	2	1	REC	7/29	35/235	0.3026
1	Hapmap47540-BTA-21819	54688405	1	0.2917	0.4557	2	0.01101	0.4918		1	Hapmap47540-BTA-21819	1	2	DOM	18/18	189/82	0.02282		1	Hapmap47540-BTA-21819	1	2	REC	3/33	58/213	0.07551
1	Hapmap39813-BTA-21834	54732278	2	0.2778	0.2786	1	1	0.9959		1	Hapmap39813-BTA-21834	2	1	DOM	17/19	129/142	1		1	Hapmap39813-BTA-21834	2	1	REC	3/33	22/249	1
1	BTB-01315457	54755430	2	0.1944	0.3173	1	0.03991	0.5192		1	BTB-01315457	2	1	DOM	13/23	148/123	0.04978		1	BTB-01315457	2	1	REC	1/35	24/247	0.3324
1	BovineHD0100015543	54797676	1	0.3611	0.3579	2	1	1.014		1	BovineHD0100015543	1	2	DOM	21/15	161/110	1		1	BovineHD0100015543	1	2	REC	5/31	33/238	0.7875
1	Hapmap51652-BTA-89898	54843886	2	0	0.01845	1	0.6157	0		1	Hapmap51652-BTA-89898	2	1	DOM	0/36	10/261	0.613		1	Hapmap51652-BTA-89898	2	1	REC	0/36	0/271	1
1	BTB-01131103	54870276	2	0.2639	0.4207	1	0.01061	0.4937		1	BTB-01131103	2	1	DOM	17/19	182/89	0.0251		1	BTB-01131103	2	1	REC	2/34	46/225	0.08861
1	Hapmap49383-BTA-93867	54908193	2	0.2778	0.2574	1	0.7748	1.11		1	Hapmap49383-BTA-93867	2	1	DOM	17/19	120/150	0.8587		1	Hapmap49383-BTA-93867	2	1	REC	3/33	19/251	0.7321
1	BTB-01131178	54941210	2	0.1111	0.1015	1	0.8358	1.107		1	BTB-01131178	2	1	DOM	7/29	54/217	1		1	BTB-01131178	2	1	REC	1/35	1/270	0.2211
1	BTA-93863-no-rs	54969062	1	0.375	0.3852	2	0.8981	0.9577		1	BTA-93863-no-rs	1	2	DOM	24/12	167/103	0.7145		1	BTA-93863-no-rs	1	2	REC	3/33	41/229	0.4458
1	ARS-BFGL-BAC-32896	55026335	2	0.375	0.4201	1	0.525	0.8283		1	ARS-BFGL-BAC-32896	2	1	DOM	22/14	181/88	0.4579		1	ARS-BFGL-BAC-32896	2	1	REC	5/31	45/224	0.8128
1	Hapmap38361-BTA-93866	55051389	2	0.1667	0.1389	1	0.5891	1.24		1	Hapmap38361-BTA-93866	2	1	DOM	11/25	72/198	0.6901		1	Hapmap38361-BTA-93866	2	1	REC	1/35	3/267	0.3955
1	BTB-01131384	55079792	1	0.02778	0.04982	2	0.5615	0.545		1	BTB-01131384	1	2	DOM	2/34	27/244	0.5511		1	BTB-01131384	1	2	REC	0/36	0/271	1
1	BTB-01914655	55130499	2	0.375	0.4185	1	0.5255	0.8336		1	BTB-01914655	2	1	DOM	22/14	181/89	0.5735		1	BTB-01914655	2	1	REC	5/31	45/225	0.8129
1	BovineHD0100015649	55258490	1	0.3194	0.4742	2	0.01632	0.5205		1	BovineHD0100015649	1	2	DOM	20/16	199/72	0.03146		1	BovineHD0100015649	1	2	REC	3/33	58/213	0.07551
1	BovineHD0100015656	55291541	1	0.2361	0.137	2	0.03379	1.946		1	BovineHD0100015656	1	2	DOM	16/20	71/199	0.03021		1	BovineHD0100015656	1	2	REC	1/35	3/267	0.3955
1	ARS-BFGL-NGS-115305	55369328	1	0.2222	0.1352	2	0.07278	1.828		1	ARS-BFGL-NGS-115305	1	2	DOM	15/21	67/203	0.0439		1	ARS-BFGL-NGS-115305	1	2	REC	1/35	6/264	0.5875
1	Hapmap32092-BTA-149957	55395795	1	0.3194	0.2989	2	0.7847	1.101		1	Hapmap32092-BTA-149957	1	2	DOM	20/16	139/132	0.7234		1	Hapmap32092-BTA-149957	1	2	REC	3/33	23/248	1
1	ARS-BFGL-NGS-85105	55417768	1	0.5972	0.4686	2	0.0448	1.681		1	ARS-BFGL-NGS-85105	1	2	DOM	31/5	195/76	0.07345		1	ARS-BFGL-NGS-85105	1	2	REC	12/24	59/212	0.141
1	BovineHD0100015703	55476049	1	0.3194	0.3007	2	0.7852	1.091		1	BovineHD0100015703	1	2	DOM	19/17	140/131	1		1	BovineHD0100015703	1	2	REC	4/32	23/248	0.5381
1	Hapmap47445-BTA-93870	55515620	1	0.4444	0.342	2	0.09002	1.539		1	Hapmap47445-BTA-93870	1	2	DOM	24/12	152/117	0.284		1	Hapmap47445-BTA-93870	1	2	REC	8/28	32/237	0.1104
1	Hapmap33225-BTA-151395	55580815	1	0.1944	0.1771	2	0.7437	1.121		1	Hapmap33225-BTA-151395	1	2	DOM	11/25	88/183	1		1	Hapmap33225-BTA-151395	1	2	REC	3/33	8/263	0.1262
1	BovineHD4100000306	55595254	2	0.3333	0.3377	1	1	0.9807		1	BovineHD4100000306	2	1	DOM	21/15	146/122	0.7233		1	BovineHD4100000306	2	1	REC	3/33	35/233	0.5932
1	BovineHD0100015754	55616621	2	0.4167	0.4004	1	0.7992	1.07		1	BovineHD0100015754	2	1	DOM	24/12	169/102	0.7148		1	BovineHD0100015754	2	1	REC	6/30	48/223	1
1	ARS-BFGL-NGS-39684	55670650	1	0.05556	0.03321	2	0.3122	1.712		1	ARS-BFGL-NGS-39684	1	2	DOM	4/32	18/253	0.3066		1	ARS-BFGL-NGS-39684	1	2	REC	0/36	0/271	1
1	Hapmap43173-BTA-120253	55779057	1	0.2083	0.3395	2	0.03134	0.512		1	Hapmap43173-BTA-120253	1	2	DOM	13/23	157/114	0.01941		1	Hapmap43173-BTA-120253	1	2	REC	2/34	27/244	0.5511
1	BovineHD0100015822	55837262	1	0.375	0.4963	2	0.05978	0.609		1	BovineHD0100015822	1	2	DOM	21/15	199/71	0.07405		1	BovineHD0100015822	1	2	REC	6/30	69/201	0.3051
1	BTA-25876-no-rs	56134816	2	0.4028	0.3796	1	0.7006	1.102		1	BTA-25876-no-rs	2	1	DOM	22/14	164/106	1		1	BTA-25876-no-rs	2	1	REC	7/29	41/229	0.4718
1	BovineHD0100015894	56151365	2	0.5139	0.4428	1	0.2597	1.33		1	BovineHD0100015894	2	1	DOM	25/11	183/88	1		1	BovineHD0100015894	2	1	REC	12/24	57/214	0.1344
1	ARS-BFGL-NGS-97046	56196281	1	0.5	0.4317	2	0.3123	1.316		1	ARS-BFGL-NGS-97046	1	2	DOM	24/12	181/90	1		1	ARS-BFGL-NGS-97046	1	2	REC	12/24	53/218	0.07987
1	BTA-25809-no-rs	56253478	2	0.4306	0.4815	1	0.4524	0.814		1	BTA-25809-no-rs	2	1	DOM	22/14	199/72	0.1652		1	BTA-25809-no-rs	2	1	REC	9/27	62/209	0.8336
1	ARS-BFGL-NGS-38890	56446383	2	0.1528	0.131	1	0.5825	1.196		1	ARS-BFGL-NGS-38890	2	1	DOM	11/25	67/204	0.4239		1	ARS-BFGL-NGS-38890	2	1	REC	0/36	4/267	1
1	ARS-BFGL-NGS-59270	56483517	2	0.2222	0.1661	1	0.246	1.435		1	ARS-BFGL-NGS-59270	2	1	DOM	15/21	82/189	0.1837		1	ARS-BFGL-NGS-59270	2	1	REC	1/35	8/263	1
1	BovineHD0100016081	56504825	1	0.4306	0.3704	2	0.3652	1.285		1	BovineHD0100016081	1	2	DOM	24/12	163/107	0.5857		1	BovineHD0100016081	1	2	REC	7/29	37/233	0.3231
1	ARS-BFGL-NGS-15221	56564301	1	0.02778	0.01661	2	0.3764	1.692		1	ARS-BFGL-NGS-15221	1	2	DOM	2/34	9/262	0.6245		1	ARS-BFGL-NGS-15221	1	2	REC	0/36	0/271	1
1	ARS-BFGL-NGS-52696	56632142	1	0.1806	0.1292	2	0.269	1.486		1	ARS-BFGL-NGS-52696	1	2	DOM	12/24	65/206	0.2251		1	ARS-BFGL-NGS-52696	1	2	REC	1/35	5/266	0.53
1	Hapmap39218-BTA-25795	56722807	1	0.4306	0.3708	2	0.3655	1.283		1	Hapmap39218-BTA-25795	1	2	DOM	24/12	162/109	0.4723		1	Hapmap39218-BTA-25795	1	2	REC	7/29	39/232	0.4553
1	ARS-BFGL-NGS-89	56752229	1	0.2639	0.1981	2	0.2143	1.451		1	ARS-BFGL-NGS-89	1	2	DOM	17/19	100/170	0.2744		1	ARS-BFGL-NGS-89	1	2	REC	2/34	7/263	0.2864
1	UA-IFASA-5597	56790295	1	0.3472	0.4446	2	0.1296	0.6643		1	UA-IFASA-5597	1	2	DOM	18/18	192/79	0.02065		1	UA-IFASA-5597	1	2	REC	7/29	49/222	0.82
1	ARS-BFGL-NGS-18996	56841984	1	0.5139	0.4004	2	0.07477	1.583		1	ARS-BFGL-NGS-18996	1	2	DOM	25/11	173/98	0.5811		1	ARS-BFGL-NGS-18996	1	2	REC	12/24	44/227	0.02
1	BovineHD0100016232	56873807	1	0.5139	0.4611	2	0.451	1.235		1	BovineHD0100016232	1	2	DOM	27/9	189/81	0.6972		1	BovineHD0100016232	1	2	REC	10/26	60/210	0.5259
1	BovineHD0100016238	56903414	1	0.4722	0.4315	2	0.5291	1.179		1	BovineHD0100016238	1	2	DOM	25/11	184/86	1		1	BovineHD0100016238	1	2	REC	9/27	49/221	0.3645
1	Hapmap59481-rs29019616	56944392	2	0.1389	0.1255	1	0.7084	1.124		1	Hapmap59481-rs29019616	2	1	DOM	8/28	63/208	1		1	Hapmap59481-rs29019616	2	1	REC	2/34	5/266	0.1927
1	BovineHD0100016281	56978092	1	0.5833	0.4815	2	0.1317	1.508		1	BovineHD0100016281	1	2	DOM	30/6	207/63	0.5239		1	BovineHD0100016281	1	2	REC	12/24	53/217	0.08038
1	BovineHD0100016287	56995206	2	0.3333	0.2667	1	0.2607	1.375		1	BovineHD0100016287	2	1	DOM	20/16	124/146	0.2917		1	BovineHD0100016287	2	1	REC	4/32	20/250	0.5039
1	BovineHD0100016294	57006702	1	0.4167	0.4022	2	0.8984	1.062		1	BovineHD0100016294	1	2	DOM	24/12	183/88	1		1	BovineHD0100016294	1	2	REC	6/30	35/236	0.6004
1	Hapmap44594-BTA-25389	57029947	2	0.3056	0.2786	1	0.676	1.139		1	Hapmap44594-BTA-25389	2	1	DOM	18/18	136/135	1		1	Hapmap44594-BTA-25389	2	1	REC	4/32	15/256	0.2567
1	BTA-25403-no-rs	57147119	2	0.1528	0.1347	1	0.7146	1.159		1	BTA-25403-no-rs	2	1	DOM	11/25	67/204	0.4239		1	BTA-25403-no-rs	2	1	REC	0/36	6/265	1
1	ARS-BFGL-NGS-34519	57180246	1	0.05556	0.03321	2	0.3122	1.712		1	ARS-BFGL-NGS-34519	1	2	DOM	4/32	18/253	0.3066		1	ARS-BFGL-NGS-34519	1	2	REC	0/36	0/271	1
1	Hapmap38147-BTA-25404	57217658	2	0.4306	0.3173	1	0.06216	1.626		1	Hapmap38147-BTA-25404	2	1	DOM	24/12	148/123	0.2116		1	Hapmap38147-BTA-25404	2	1	REC	7/29	24/247	0.0705
1	ARS-BFGL-NGS-102073	57249444	1	0.08333	0.0738	2	0.8107	1.141		1	ARS-BFGL-NGS-102073	1	2	DOM	5/31	39/232	1		1	ARS-BFGL-NGS-102073	1	2	REC	1/35	1/270	0.2211
1	BovineHD0100016358	57269695	2	0.2639	0.2204	1	0.4526	1.268		1	BovineHD0100016358	2	1	DOM	16/20	101/169	0.4666		1	BovineHD0100016358	2	1	REC	3/33	18/252	0.7235
1	Hapmap55498-ss46527080	57309255	1	0.4306	0.3542	2	0.2403	1.378		1	Hapmap55498-ss46527080	1	2	DOM	24/12	158/113	0.3716		1	Hapmap55498-ss46527080	1	2	REC	7/29	34/237	0.2937
1	BovineHD0100016374	57354786	2	0.2639	0.2362	1	0.6592	1.159		1	BovineHD0100016374	2	1	DOM	16/20	107/164	0.5906		1	BovineHD0100016374	2	1	REC	3/33	21/250	0.7513
1	ARS-BFGL-NGS-94399	57399338	2	0.1389	0.1181	1	0.567	1.205		1	ARS-BFGL-NGS-94399	2	1	DOM	9/27	61/210	0.8325		1	ARS-BFGL-NGS-94399	2	1	REC	1/35	3/268	0.3944
1	ARS-BFGL-NGS-109258	57447817	1	0.08333	0.0738	2	0.8107	1.141		1	ARS-BFGL-NGS-109258	1	2	DOM	5/31	39/232	1		1	ARS-BFGL-NGS-109258	1	2	REC	1/35	1/270	0.2211
1	ARS-BFGL-NGS-112451	57469104	1	0.5278	0.4483	2	0.2106	1.375		1	ARS-BFGL-NGS-112451	1	2	DOM	27/9	193/78	0.6986		1	ARS-BFGL-NGS-112451	1	2	REC	11/25	50/221	0.1169
1	ARS-BFGL-NGS-87988	57496780	2	0.08333	0.07407	1	0.8111	1.136		1	ARS-BFGL-NGS-87988	2	1	DOM	5/31	39/231	1		1	ARS-BFGL-NGS-87988	2	1	REC	1/35	1/269	0.2218
1	BovineHD0100016445	57668777	2	0.3571	0.4007	1	0.5179	0.8307		1	BovineHD0100016445	2	1	DOM	20/15	177/90	0.3454		1	BovineHD0100016445	2	1	REC	5/30	37/230	1
1	BovineHD0100016455	57703184	2	0.4722	0.3579	1	0.06904	1.605		1	BovineHD0100016455	2	1	DOM	26/10	161/110	0.1504		1	BovineHD0100016455	2	1	REC	8/28	33/238	0.1153
1	BovineHD0100016466	57757427	2	0.3	0.2659	1	0.5676	1.183		1	BovineHD0100016466	2	1	DOM	18/17	125/142	0.7193		1	BovineHD0100016466	2	1	REC	3/32	17/250	0.7141
1	BovineHD0100016479	57824017	1	0.4861	0.3948	2	0.16	1.45		1	BovineHD0100016479	1	2	DOM	26/10	169/102	0.2745		1	BovineHD0100016479	1	2	REC	9/27	45/226	0.2429
1	BovineHD0100016540	57991815	2	0.3143	0.4157	1	0.1202	0.6441		1	BovineHD0100016540	2	1	DOM	18/17	179/88	0.08848		1	BovineHD0100016540	2	1	REC	4/31	43/224	0.6226
1	ARS-BFGL-NGS-40337	58000696	1	0.4444	0.4336	2	0.8996	1.045		1	ARS-BFGL-NGS-40337	1	2	DOM	26/10	183/88	0.7042		1	ARS-BFGL-NGS-40337	1	2	REC	6/30	52/219	0.8239
1	BovineHD0100016543	58010555	2	0.3429	0.264	1	0.1985	1.454		1	BovineHD0100016543	2	1	DOM	18/17	122/145	0.5902		1	BovineHD0100016543	2	1	REC	6/29	19/248	0.05358
1	BovineHD0100016547	58022228	1	0.5714	0.4682	2	0.1265	1.515		1	BovineHD0100016547	1	2	DOM	27/8	193/74	0.6868		1	BovineHD0100016547	1	2	REC	13/22	57/210	0.05318
1	BovineHD0100016552	58037238	1	0.4861	0.4111	2	0.2531	1.355		1	BovineHD0100016552	1	2	DOM	28/8	174/96	0.1352		1	BovineHD0100016552	1	2	REC	7/29	48/222	0.8179
1	BovineHD0100016570	58101934	1	0.2778	0.2177	2	0.2922	1.382		1	BovineHD0100016570	1	2	DOM	15/21	103/168	0.7169		1	BovineHD0100016570	1	2	REC	5/31	15/256	0.06966
1	BovineHD0100016583	58142540	2	0.1667	0.1273	1	0.3551	1.371		1	BovineHD0100016583	2	1	DOM	12/24	67/204	0.3101		1	BovineHD0100016583	2	1	REC	0/36	2/269	1
1	Hapmap36459-SCAFFOLD9563_462	58250592	1	0.2361	0.2214	2	0.7645	1.087		1	Hapmap36459-SCAFFOLD9563_462	1	2	DOM	13/23	108/163	0.7196		1	Hapmap36459-SCAFFOLD9563_462	1	2	REC	4/32	12/259	0.1034
1	Hapmap23307-BTA-124083	58277309	2	0.02778	0.0369	1	1	0.7457		1	Hapmap23307-BTA-124083	2	1	DOM	2/34	20/251	1		1	Hapmap23307-BTA-124083	2	1	REC	0/36	0/271	1
1	ARS-BFGL-NGS-103637	58315322	2	0.1667	0.1389	1	0.5891	1.24		1	ARS-BFGL-NGS-103637	2	1	DOM	9/27	71/199	1		1	ARS-BFGL-NGS-103637	2	1	REC	3/33	4/266	0.03765
1	BovineHD0100016660	58350244	1	0.3611	0.4188	2	0.3747	0.7843		1	BovineHD0100016660	1	2	DOM	21/15	183/88	0.3474		1	BovineHD0100016660	1	2	REC	5/31	44/227	1
1	BovineHD0100016692	58509867	1	0.1143	0.09888	2	0.6732	1.176		1	BovineHD0100016692	1	2	DOM	7/28	52/216	1		1	BovineHD0100016692	1	2	REC	1/34	1/267	0.218
1	BovineHD0100016696	58530676	1	0.4143	0.4663	2	0.4458	0.8096		1	BovineHD0100016696	1	2	DOM	22/13	192/75	0.3223		1	BovineHD0100016696	1	2	REC	7/28	57/210	1
1	BovineHD0100016697	58535639	1	0.4143	0.4663	2	0.4458	0.8096		1	BovineHD0100016697	1	2	DOM	22/13	192/75	0.3223		1	BovineHD0100016697	1	2	REC	7/28	57/210	1
1	Hapmap44172-BTA-96950	58540410	1	0.4167	0.4649	2	0.4533	0.822		1	Hapmap44172-BTA-96950	1	2	DOM	23/13	195/76	0.3316		1	Hapmap44172-BTA-96950	1	2	REC	7/29	57/214	1
1	BovineHD0100046466	58586597	2	0.2222	0.1315	1	0.04743	1.887		1	BovineHD0100046466	2	1	DOM	12/24	65/205	0.2265		1	BovineHD0100046466	2	1	REC	4/32	6/264	0.02033
1	Hapmap47450-BTA-96948	58626471	1	0.5	0.3506	2	0.0187	1.853		1	Hapmap47450-BTA-96948	1	2	DOM	27/9	157/114	0.06908		1	Hapmap47450-BTA-96948	1	2	REC	9/27	33/238	0.06556
1	BovineHD0100016719	58630970	2	0.125	0.1033	1	0.5433	1.24		1	BovineHD0100016719	2	1	DOM	8/28	54/217	0.825		1	BovineHD0100016719	2	1	REC	1/35	2/269	0.313
1	BovineHD0100016728	58675214	2	0.3143	0.2305	1	0.1369	1.53		1	BovineHD0100016728	2	1	DOM	19/16	117/152	0.2787		1	BovineHD0100016728	2	1	REC	3/32	7/262	0.09529
1	BTA-96949-no-rs	58773333	1	0.5	0.3616	2	0.02762	1.765		1	BTA-96949-no-rs	1	2	DOM	28/8	163/108	0.04474		1	BTA-96949-no-rs	1	2	REC	8/28	33/238	0.1153
1	BovineHD0100016781	58803748	2	0.3143	0.2556	1	0.3127	1.335		1	BovineHD0100016781	2	1	DOM	18/17	119/151	0.4715		1	BovineHD0100016781	2	1	REC	4/31	19/251	0.317
1	BTA-31615-no-rs	58830804	1	0.375	0.3192	2	0.3509	1.28		1	BTA-31615-no-rs	1	2	DOM	21/15	149/122	0.7254		1	BTA-31615-no-rs	1	2	REC	6/30	24/247	0.1403
1	BovineHD0100016763	58880630	2	0.4286	0.3545	1	0.2361	1.366		1	BovineHD0100016763	2	1	DOM	24/11	161/107	0.3629		1	BovineHD0100016763	2	1	REC	6/29	29/239	0.2649
1	Hapmap44328-BTA-97952	58885004	1	0.1806	0.1439	2	0.3825	1.311		1	Hapmap44328-BTA-97952	1	2	DOM	13/23	74/197	0.3246		1	Hapmap44328-BTA-97952	1	2	REC	0/36	4/267	1
1	BovineHD0100016802	58914092	2	0.2429	0.2082	1	0.5343	1.22		1	BovineHD0100016802	2	1	DOM	14/21	103/166	0.8551		1	BovineHD0100016802	2	1	REC	3/32	9/260	0.1487
1	ARS-USMARC-Parent-DQ404150-rs29012530	58965351	1	0.2917	0.2435	2	0.3856	1.279		1	ARS-USMARC-Parent-DQ404150-rs29012530	1	2	DOM	17/19	117/154	0.7215		1	ARS-USMARC-Parent-DQ404150-rs29012530	1	2	REC	4/32	15/256	0.2567
1	UA-IFASA-2169	58991146	1	0.3472	0.2583	2	0.1201	1.527		1	UA-IFASA-2169	1	2	DOM	20/16	125/146	0.2936		1	UA-IFASA-2169	1	2	REC	5/31	15/256	0.06966
1	BovineHD0100016837	58999514	1	0.5571	0.4739	2	0.2049	1.397		1	BovineHD0100016837	1	2	DOM	28/7	203/65	0.6765		1	BovineHD0100016837	1	2	REC	11/24	51/217	0.1163
1	BovineHD0100016850	59041533	1	0.4583	0.437	2	0.8007	1.09		1	BovineHD0100016850	1	2	DOM	25/11	192/78	0.8464		1	BovineHD0100016850	1	2	REC	8/28	44/226	0.3524
1	BTB-00028136	59116837	1	0.3333	0.2196	2	0.03773	1.777		1	BTB-00028136	1	2	DOM	21/15	108/163	0.04712		1	BTB-00028136	1	2	REC	3/33	11/260	0.2179
1	BTB-01868157	59146697	1	0.1389	0.1033	2	0.4157	1.4		1	BTB-01868157	1	2	DOM	9/27	53/218	0.5068		1	BTB-01868157	1	2	REC	1/35	3/268	0.3944
1	BovineHD0100016878	59159905	1	0.4583	0.4167	2	0.5267	1.185		1	BovineHD0100016878	1	2	DOM	24/12	177/93	1		1	BovineHD0100016878	1	2	REC	9/27	48/222	0.3602
1	BTB-00028238	59203569	1	0.3889	0.3376	2	0.4285	1.248		1	BTB-00028238	1	2	DOM	24/12	151/120	0.2823		1	BTB-00028238	1	2	REC	4/32	32/239	1
1	Hapmap48289-BTA-31617	59240053	2	0.1389	0.1347	1	0.8562	1.036		1	Hapmap48289-BTA-31617	2	1	DOM	8/28	68/203	0.8383		1	Hapmap48289-BTA-31617	2	1	REC	2/34	5/266	0.1927
1	ARS-BFGL-NGS-94997	59266659	1	0.25	0.2362	2	0.77	1.078		1	ARS-BFGL-NGS-94997	1	2	DOM	17/19	114/157	0.5933		1	ARS-BFGL-NGS-94997	1	2	REC	1/35	14/257	1
1	BovineHD0100016948	59444156	2	0.3889	0.3506	1	0.5155	1.179		1	BovineHD0100016948	2	1	DOM	21/15	160/111	1		1	BovineHD0100016948	2	1	REC	7/29	30/241	0.1701
1	BovineHD0100016955	59474636	2	0.2778	0.393	1	0.06997	0.5941		1	BovineHD0100016955	2	1	DOM	18/18	172/99	0.144		1	BovineHD0100016955	2	1	REC	2/34	41/230	0.1971
1	BovineHD0100016959	59498681	1	0.2361	0.1882	2	0.3422	1.333		1	BovineHD0100016959	1	2	DOM	16/20	92/179	0.2649		1	BovineHD0100016959	1	2	REC	1/35	10/261	1
1	Hapmap48717-BTA-31633	59520349	1	0.4306	0.3653	2	0.3007	1.314		1	Hapmap48717-BTA-31633	1	2	DOM	26/10	166/105	0.2713		1	Hapmap48717-BTA-31633	1	2	REC	5/31	32/239	0.7843
1	BTB-00028647	59555496	1	0.3889	0.3303	2	0.3535	1.291		1	BTB-00028647	1	2	DOM	22/14	149/122	0.5929		1	BTB-00028647	1	2	REC	6/30	30/241	0.4043
1	BovineHD0100016992	59659477	2	0.3056	0.2444	1	0.311	1.36		1	BovineHD0100016992	2	1	DOM	18/18	117/153	0.4785		1	BovineHD0100016992	2	1	REC	4/32	15/255	0.2574
1	Hapmap31065-BTA-123406	59686995	2	0.3333	0.2768	1	0.3312	1.307		1	Hapmap31065-BTA-123406	2	1	DOM	20/16	132/139	0.4812		1	Hapmap31065-BTA-123406	2	1	REC	4/32	18/253	0.3066
1	BovineHD0100017003	59704724	1	0.5	0.4222	2	0.2542	1.368		1	BovineHD0100017003	1	2	DOM	29/7	190/80	0.2415		1	BovineHD0100017003	1	2	REC	7/29	38/232	0.4503
1	BTA-31638-no-rs	59733534	2	0.02778	0.02952	1	1	0.9393		1	BTA-31638-no-rs	2	1	DOM	2/34	16/255	1		1	BTA-31638-no-rs	2	1	REC	0/36	0/271	1
1	ARS-BFGL-NGS-110620	59777594	1	0.1944	0.1771	2	0.7437	1.121		1	ARS-BFGL-NGS-110620	1	2	DOM	13/23	88/183	0.707		1	ARS-BFGL-NGS-110620	1	2	REC	1/35	8/263	1
1	BovineHD0100017026	59780658	1	0.4444	0.4207	2	0.7053	1.102		1	BovineHD0100017026	1	2	DOM	24/12	179/92	1		1	BovineHD0100017026	1	2	REC	8/28	49/222	0.5026
1	BovineHD0100017032	59814364	1	0.2639	0.2389	2	0.6609	1.142		1	BovineHD0100017032	1	2	DOM	15/21	111/159	1		1	BovineHD0100017032	1	2	REC	4/32	18/252	0.308
1	BovineHD0100017052	59896010	1	0.1806	0.1654	2	0.7376	1.112		1	BovineHD0100017052	1	2	DOM	12/24	81/188	0.7024		1	BovineHD0100017052	1	2	REC	1/35	8/261	1
1	Hapmap47563-BTA-31648	59924376	2	0.3472	0.3044	1	0.4979	1.215		1	Hapmap47563-BTA-31648	2	1	DOM	22/14	145/126	0.477		1	Hapmap47563-BTA-31648	2	1	REC	3/33	20/251	0.741
1	BovineHD0100017076	59960792	1	0.3472	0.3148	2	0.5916	1.158		1	BovineHD0100017076	1	2	DOM	22/14	148/122	0.5927		1	BovineHD0100017076	1	2	REC	3/33	22/248	1
1	ARS-BFGL-NGS-36297	59980590	1	0.3889	0.3745	2	0.7975	1.063		1	ARS-BFGL-NGS-36297	1	2	DOM	23/13	170/101	1		1	ARS-BFGL-NGS-36297	1	2	REC	5/31	33/238	0.7875
1	BovineHD0100017085	59982960	2	0.4583	0.5	1	0.5321	0.8462		1	BovineHD0100017085	2	1	DOM	25/11	200/68	0.5448		1	BovineHD0100017085	2	1	REC	8/28	68/200	0.8381
1	BovineHD4100000339	60006646	2	0.2361	0.1914	1	0.3487	1.305		1	BovineHD4100000339	2	1	DOM	15/21	96/173	0.5804		1	BovineHD4100000339	2	1	REC	2/34	7/262	0.2878
1	ARS-BFGL-NGS-115239	60022954	2	0.3194	0.2749	1	0.4849	1.238		1	ARS-BFGL-NGS-115239	2	1	DOM	22/14	132/139	0.214		1	ARS-BFGL-NGS-115239	2	1	REC	1/35	17/254	0.7058
1	BovineHD0100017119	60087869	2	0.3194	0.417	1	0.126	0.6563		1	BovineHD0100017119	2	1	DOM	19/17	183/88	0.09307		1	BovineHD0100017119	2	1	REC	4/32	43/228	0.6235
1	BovineHD0100017124	60123244	2	0.5417	0.4389	1	0.1031	1.511		1	BovineHD0100017124	2	1	DOM	28/8	190/80	0.4355		1	BovineHD0100017124	2	1	REC	11/25	47/223	0.07026
1	BTB-02009342	60212971	2	0.4028	0.3192	1	0.1816	1.438		1	BTB-02009342	2	1	DOM	23/13	150/121	0.3745		1	BTB-02009342	2	1	REC	6/30	23/248	0.1281
1	BTA-23353-no-rs	60247154	2	0.5	0.4114	1	0.1637	1.43		1	BTA-23353-no-rs	2	1	DOM	28/8	181/90	0.2531		1	BTA-23353-no-rs	2	1	REC	8/28	42/229	0.3357
1	ARS-BFGL-NGS-117152	60275851	1	0.2917	0.2583	2	0.5691	1.182		1	ARS-BFGL-NGS-117152	1	2	DOM	17/19	122/149	0.8594		1	ARS-BFGL-NGS-117152	1	2	REC	4/32	18/253	0.3066
1	UA-IFASA-7336	60313183	1	0.1528	0.1642	2	1	0.9178		1	UA-IFASA-7336	1	2	DOM	9/27	83/188	0.565		1	UA-IFASA-7336	1	2	REC	2/34	6/265	0.2386
1	BovineHD0100017217	60339396	1	0.4722	0.3852	2	0.1604	1.428		1	BovineHD0100017217	1	2	DOM	28/8	169/101	0.09485		1	BovineHD0100017217	1	2	REC	6/30	39/231	0.8016
1	Hapmap57078-ss46526391	60407283	2	0.25	0.2509	1	1	0.9951		1	Hapmap57078-ss46526391	2	1	DOM	17/19	122/149	0.8594		1	Hapmap57078-ss46526391	2	1	REC	1/35	14/257	1
1	ARS-BFGL-NGS-30543	60434371	1	0.5	0.4428	2	0.3793	1.258		1	ARS-BFGL-NGS-30543	1	2	DOM	27/9	194/77	0.8436		1	ARS-BFGL-NGS-30543	1	2	REC	9/27	46/225	0.2494
1	BTB-00029666	60476588	2	0.4861	0.428	1	0.377	1.264		1	BTB-00029666	2	1	DOM	26/10	180/91	0.5734		1	BTB-00029666	2	1	REC	9/27	52/219	0.3831
1	BovineHD0100017270	60497520	1	0.04167	0.02037	2	0.221	2.091		1	BovineHD0100017270	1	2	DOM	3/33	11/259	0.2194		1	BovineHD0100017270	1	2	REC	0/36	0/270	1
1	Hapmap48290-BTA-31675	60519622	2	0.3056	0.4336	1	0.04208	0.5748		1	Hapmap48290-BTA-31675	2	1	DOM	19/17	191/80	0.03691		1	Hapmap48290-BTA-31675	2	1	REC	3/33	44/227	0.3232
1	Hapmap42177-BTA-31679	60575311	1	0.1667	0.2934	2	0.025	0.4818		1	Hapmap42177-BTA-31679	1	2	DOM	11/25	138/133	0.03206		1	Hapmap42177-BTA-31679	1	2	REC	1/35	21/250	0.49
1	Hapmap35167-VSWCP1D5775A_scf01	60638907	2	0.4167	0.3413	1	0.2367	1.378		1	Hapmap35167-VSWCP1D5775A_scf01	2	1	DOM	25/11	155/116	0.2074		1	Hapmap35167-VSWCP1D5775A_scf01	2	1	REC	5/31	30/241	0.5805
1	BovineHD0100017342	60645127	2	0.2361	0.2045	1	0.5378	1.203		1	BovineHD0100017342	2	1	DOM	16/20	99/170	0.4642		1	BovineHD0100017342	2	1	REC	1/35	11/258	1
1	ARS-BFGL-NGS-107624	60678008	2	0.2639	0.2232	1	0.4556	1.247		1	ARS-BFGL-NGS-107624	2	1	DOM	17/19	110/161	0.4749		1	ARS-BFGL-NGS-107624	2	1	REC	2/34	11/260	0.6551
1	BTB-00030270	60709251	2	0.04167	0.04797	1	1	0.8629		1	BTB-00030270	2	1	DOM	3/33	25/246	1		1	BTB-00030270	2	1	REC	0/36	1/270	1
1	ARS-BFGL-NGS-3821	60736616	1	0.3889	0.3708	2	0.7959	1.08		1	ARS-BFGL-NGS-3821	1	2	DOM	23/13	161/110	0.7181		1	ARS-BFGL-NGS-3821	1	2	REC	5/31	40/231	1
1	Hapmap41191-BTA-16674	60779046	2	0.3611	0.2915	1	0.2216	1.374		1	Hapmap41191-BTA-16674	2	1	DOM	22/14	135/136	0.2188		1	Hapmap41191-BTA-16674	2	1	REC	4/32	23/248	0.5381
1	BTB-02006134	60806613	2	0.5694	0.4834	1	0.2095	1.413		1	BTB-02006134	2	1	DOM	30/6	198/73	0.2262		1	BTB-02006134	2	1	REC	11/25	64/207	0.409
1	Hapmap59735-rs29016420	60831272	2	0.4444	0.3321	1	0.06535	1.609		1	Hapmap59735-rs29016420	2	1	DOM	25/11	155/116	0.2074		1	Hapmap59735-rs29016420	2	1	REC	7/29	25/246	0.07738
1	BovineHD0100017398	60831984	1	0.2639	0.1956	2	0.2115	1.475		1	BovineHD0100017398	1	2	DOM	17/19	98/173	0.2047		1	BovineHD0100017398	1	2	REC	2/34	8/263	0.3314
1	ARS-BFGL-BAC-20015	60899823	1	0.5	0.4317	2	0.3123	1.316		1	ARS-BFGL-BAC-20015	1	2	DOM	28/8	185/86	0.3357		1	ARS-BFGL-BAC-20015	1	2	REC	8/28	49/222	0.5026
1	BovineHD0100017425	60943734	1	0.3194	0.237	2	0.1453	1.511		1	BovineHD0100017425	1	2	DOM	20/16	116/154	0.1586		1	BovineHD0100017425	1	2	REC	3/33	12/258	0.3988
1	BTB-00031129	60979138	1	0.05556	0.03875	2	0.5204	1.459		1	BTB-00031129	1	2	DOM	4/32	21/250	0.5131		1	BTB-00031129	1	2	REC	0/36	0/271	1
1	BovineHD0100017450	61036146	2	0.4722	0.3727	1	0.1216	1.506		1	BovineHD0100017450	2	1	DOM	28/8	169/102	0.09485		1	BovineHD0100017450	2	1	REC	6/30	33/238	0.4285
1	BovineHD0100017461	61075432	2	0.3611	0.2574	1	0.06711	1.631		1	BovineHD0100017461	2	1	DOM	22/14	122/148	0.078		1	BovineHD0100017461	2	1	REC	4/32	17/253	0.2889
1	BTB-00030962	61100002	2	0.1944	0.1937	1	1	1.005		1	BTB-00030962	2	1	DOM	13/23	92/179	0.8522		1	BTB-00030962	2	1	REC	1/35	13/258	1
1	Hapmap38402-BTA-32592	61128757	1	0.5278	0.428	2	0.1293	1.493		1	Hapmap38402-BTA-32592	1	2	DOM	28/8	183/88	0.2538		1	Hapmap38402-BTA-32592	1	2	REC	10/26	49/222	0.1784
1	BTB-00030894	61160105	2	0.09722	0.2565	1	0.001867	0.3122		1	BTB-00030894	2	1	DOM	7/29	126/145	0.002097		1	BTB-00030894	2	1	REC	0/36	13/258	0.3766
1	BTA-31690-no-rs	61189193	2	0	0.01292	1	1	0		1	BTA-31690-no-rs	2	1	DOM	0/36	7/264	1		1	BTA-31690-no-rs	2	1	REC	0/36	0/271	1
1	BTB-00030699	61219155	2	0.08333	0.1181	1	0.5525	0.679		1	BTB-00030699	2	1	DOM	6/30	60/211	0.5243		1	BTB-00030699	2	1	REC	0/36	4/267	1
1	ARS-BFGL-NGS-27164	61244179	2	0.01389	0.05166	1	0.2355	0.2586		1	ARS-BFGL-NGS-27164	2	1	DOM	1/35	26/245	0.2246		1	ARS-BFGL-NGS-27164	2	1	REC	0/36	2/269	1
1	BovineHD0100017541	61290448	2	0.4583	0.3561	1	0.09295	1.53		1	BovineHD0100017541	2	1	DOM	25/11	159/112	0.2777		1	BovineHD0100017541	2	1	REC	8/28	34/237	0.1228
1	BTB-00030560	61312093	1	0.04167	0.04428	2	1	0.9384		1	BTB-00030560	1	2	DOM	3/33	23/248	1		1	BTB-00030560	1	2	REC	0/36	1/270	1
1	Hapmap53538-rs29018897	61346083	2	0.1389	0.2768	1	0.01442	0.4215		1	Hapmap53538-rs29018897	2	1	DOM	10/26	133/138	0.02013		1	Hapmap53538-rs29018897	2	1	REC	0/36	17/254	0.2369
1	ARS-BFGL-NGS-2189	61409890	1	0.2917	0.4244	2	0.04061	0.5586		1	ARS-BFGL-NGS-2189	1	2	DOM	18/18	185/86	0.03861		1	ARS-BFGL-NGS-2189	1	2	REC	3/33	45/226	0.3259
1	BovineHD0100017600	61470011	2	0.375	0.4926	1	0.07824	0.618		1	BovineHD0100017600	2	1	DOM	21/15	203/68	0.0453		1	BovineHD0100017600	2	1	REC	6/30	64/207	0.4054
1	Hapmap51585-BTA-32601	61517865	1	0.08333	0.2546	2	0.0006207	0.2661		1	Hapmap51585-BTA-32601	1	2	DOM	6/30	125/146	0.0005997		1	Hapmap51585-BTA-32601	1	2	REC	0/36	13/258	0.3766
1	BTA-103663-no-rs	61538142	2	0.09722	0.07565	1	0.4862	1.316		1	BTA-103663-no-rs	2	1	DOM	7/29	39/232	0.4553		1	BTA-103663-no-rs	2	1	REC	0/36	2/269	1
1	BovineHD0100017627	61555038	2	0.3056	0.4296	1	0.05562	0.5841		1	BovineHD0100017627	2	1	DOM	18/18	182/88	0.06072		1	BovineHD0100017627	2	1	REC	4/32	50/220	0.3554
1	ARS-BFGL-NGS-40229	61583136	1	0.3611	0.3118	2	0.4199	1.247		1	ARS-BFGL-NGS-40229	1	2	DOM	21/15	139/132	0.4801		1	ARS-BFGL-NGS-40229	1	2	REC	5/31	30/241	0.5805
1	BovineHD0100017646	61605906	1	0.3472	0.2804	2	0.268	1.365		1	BovineHD0100017646	1	2	DOM	21/15	128/143	0.22		1	BovineHD0100017646	1	2	REC	4/32	24/247	0.7562
1	BovineHD0100017648	61618060	2	0.3611	0.3074	1	0.3479	1.273		1	BovineHD0100017648	2	1	DOM	21/15	138/132	0.4793		1	BovineHD0100017648	2	1	REC	5/31	28/242	0.5651
1	ARS-BFGL-NGS-101934	61629350	2	0.1667	0.1199	1	0.2578	1.468		1	ARS-BFGL-NGS-101934	2	1	DOM	10/26	62/209	0.532		1	ARS-BFGL-NGS-101934	2	1	REC	2/34	3/268	0.1066
1	BovineHD0100017650	61638069	2	0.4306	0.4	1	0.612	1.134		1	BovineHD0100017650	2	1	DOM	25/11	182/88	0.8522		1	BovineHD0100017650	2	1	REC	6/30	34/236	0.441
1	BovineHD0100017660	61697968	2	0.3611	0.4649	1	0.1027	0.6504		1	BovineHD0100017660	2	1	DOM	22/14	204/67	0.1053		1	BovineHD0100017660	2	1	REC	4/32	48/223	0.4772
1	Hapmap42400-BTA-102731	61741423	2	0.5556	0.4668	1	0.1685	1.428		1	Hapmap42400-BTA-102731	2	1	DOM	31/5	201/70	0.1488		1	Hapmap42400-BTA-102731	2	1	REC	9/27	52/219	0.3831
1	BovineHD0100017684	61774550	1	0.2083	0.1494	2	0.2252	1.498		1	BovineHD0100017684	1	2	DOM	13/23	76/195	0.3316		1	BovineHD0100017684	1	2	REC	2/34	5/266	0.1927
1	ARS-BFGL-NGS-91410	61817159	2	0.2083	0.1439	1	0.1619	1.565		1	ARS-BFGL-NGS-91410	2	1	DOM	13/23	73/198	0.2436		1	ARS-BFGL-NGS-91410	2	1	REC	2/34	5/266	0.1927
1	BovineHD0100017707	61897376	2	0.3194	0.2712	1	0.4018	1.261		1	BovineHD0100017707	2	1	DOM	20/16	128/143	0.3786		1	BovineHD0100017707	2	1	REC	3/33	19/252	0.7315
1	BTB-01806856	62003821	1	0.3056	0.2675	2	0.4841	1.205		1	BTB-01806856	1	2	DOM	19/17	127/144	0.5949		1	BTB-01806856	1	2	REC	3/33	18/253	0.723
1	BovineHD0100017729	62009095	2	0.4722	0.413	1	0.3742	1.272		1	BovineHD0100017729	2	1	DOM	27/9	179/91	0.3477		1	BovineHD0100017729	2	1	REC	7/29	44/226	0.6356
1	BovineHD0100017746	62066946	1	0.2361	0.1661	2	0.1399	1.552		1	BovineHD0100017746	1	2	DOM	15/21	84/187	0.2542		1	BovineHD0100017746	1	2	REC	2/34	6/265	0.2386
1	Hapmap39200-BTA-32607	62092465	1	0.5556	0.4631	2	0.1669	1.449		1	Hapmap39200-BTA-32607	1	2	DOM	30/6	195/76	0.1656		1	Hapmap39200-BTA-32607	1	2	REC	10/26	56/215	0.3868
1	Hapmap38640-BTA-92406	62137916	2	0.5556	0.4539	1	0.1309	1.504		1	Hapmap38640-BTA-92406	2	1	DOM	29/7	193/78	0.3217		1	Hapmap38640-BTA-92406	2	1	REC	11/25	53/218	0.131
1	BovineHD0100017773	62178500	1	0.3611	0.4463	2	0.2058	0.7012		1	BovineHD0100017773	1	2	DOM	24/12	192/78	0.5651		1	BovineHD0100017773	1	2	REC	2/34	49/221	0.05888
1	BovineHD0100017775	62188650	1	0.4444	0.3614	2	0.194	1.413		1	BovineHD0100017775	1	2	DOM	24/12	160/107	0.4728		1	BovineHD0100017775	1	2	REC	8/28	33/234	0.119
1	BTB-00031464	62207514	1	0.3472	0.3063	2	0.4993	1.205		1	BTB-00031464	1	2	DOM	21/15	147/124	0.7229		1	BTB-00031464	1	2	REC	4/32	19/252	0.3273
1	BovineHD0100017788	62228314	2	0.375	0.2546	1	0.03427	1.757		1	BovineHD0100017788	2	1	DOM	24/12	125/146	0.02193		1	BovineHD0100017788	2	1	REC	3/33	13/258	0.4142
1	BTB-00031535	62238398	2	0.2917	0.2085	1	0.128	1.563		1	BTB-00031535	2	1	DOM	19/17	100/171	0.07131		1	BTB-00031535	2	1	REC	2/34	13/258	0.6913
1	BovineHD0100017797	62247467	2	0.4857	0.4093	1	0.2471	1.363		1	BovineHD0100017797	2	1	DOM	25/10	178/92	0.5728		1	BovineHD0100017797	2	1	REC	9/26	43/227	0.1548
1	ARS-BFGL-NGS-42248	62269764	2	0.125	0.3192	1	0.000508	0.3047		1	ARS-BFGL-NGS-42248	2	1	DOM	9/27	149/122	0.001142		1	ARS-BFGL-NGS-42248	2	1	REC	0/36	24/247	0.0912
1	BovineHD0100017803	62273759	1	0.2	0.3704	2	0.004951	0.425		1	BovineHD0100017803	1	2	DOM	13/22	164/106	0.01032		1	BovineHD0100017803	1	2	REC	1/34	36/234	0.0966
1	ARS-BFGL-NGS-102719	62305513	1	0.1528	0.3561	2	0.0004614	0.3261		1	ARS-BFGL-NGS-102719	1	2	DOM	11/25	159/112	0.002084		1	ARS-BFGL-NGS-102719	1	2	REC	0/36	34/237	0.02047
1	BovineHD0100017817	62327960	2	0.4583	0.3074	1	0.01534	1.906		1	BovineHD0100017817	2	1	DOM	25/11	139/131	0.05038		1	BovineHD0100017817	2	1	REC	8/28	27/243	0.04632
1	ARS-BFGL-NGS-115080	62364649	2	0.1389	0.05904	1	0.02157	2.571		1	ARS-BFGL-NGS-115080	2	1	DOM	10/26	32/239	0.01702		1	ARS-BFGL-NGS-115080	2	1	REC	0/36	0/271	1
1	ARS-BFGL-NGS-114995	62394973	1	0.06944	0.2491	2	0.0002757	0.225		1	ARS-BFGL-NGS-114995	1	2	DOM	5/31	124/147	0.000233		1	ARS-BFGL-NGS-114995	1	2	REC	0/36	11/260	0.3737
1	ARS-BFGL-NGS-100977	62421587	2	0.4306	0.3432	1	0.1508	1.447		1	ARS-BFGL-NGS-100977	2	1	DOM	24/12	152/119	0.2827		1	ARS-BFGL-NGS-100977	2	1	REC	7/29	34/237	0.2937
1	BovineHD0100017842	62445177	2	0.09722	0.09259	1	0.8308	1.055		1	BovineHD0100017842	2	1	DOM	7/29	49/221	0.8205		1	BovineHD0100017842	2	1	REC	0/36	1/269	1
1	BTB-01665387	62457515	1	0.1806	0.3653	2	0.00149	0.3828		1	BTB-01665387	1	2	DOM	12/24	163/108	0.003648		1	BTB-01665387	1	2	REC	1/35	35/236	0.09664
1	BovineHD0100017851	62471598	1	0.5286	0.4481	2	0.251	1.381		1	BovineHD0100017851	1	2	DOM	25/10	189/81	1		1	BovineHD0100017851	1	2	REC	12/23	53/217	0.07627
1	BovineHD0100017855	62488432	1	0.2143	0.2045	2	0.8752	1.061		1	BovineHD0100017855	1	2	DOM	13/22	100/169	1		1	BovineHD0100017855	1	2	REC	2/33	10/259	0.6356
1	BovineHD0100017856	62490666	1	0.2143	0.2045	2	0.8752	1.061		1	BovineHD0100017856	1	2	DOM	13/22	100/169	1		1	BovineHD0100017856	1	2	REC	2/33	10/259	0.6356
1	ARS-BFGL-NGS-14335	62494500	1	0.2222	0.2066	2	0.7583	1.097		1	ARS-BFGL-NGS-14335	1	2	DOM	14/22	101/170	0.8563		1	ARS-BFGL-NGS-14335	1	2	REC	2/34	11/260	0.6551
1	BTB-01506507	62523255	2	0.3889	0.3635	1	0.6971	1.114		1	BTB-01506507	2	1	DOM	25/11	171/100	0.5802		1	BTB-01506507	2	1	REC	3/33	26/245	1
1	BovineHD0100017879	62560018	1	0.1389	0.1426	2	1	0.9698		1	BovineHD0100017879	1	2	DOM	9/27	71/199	1		1	BovineHD0100017879	1	2	REC	1/35	6/264	0.5875
1	BTB-01285049	62594967	2	0.3333	0.2878	1	0.4124	1.237		1	BTB-01285049	2	1	DOM	22/14	134/137	0.2164		1	BTB-01285049	2	1	REC	2/34	22/249	1
1	ARS-BFGL-NGS-112682	62631854	2	0.2639	0.19	1	0.1568	1.528		1	ARS-BFGL-NGS-112682	2	1	DOM	17/19	90/181	0.1352		1	ARS-BFGL-NGS-112682	2	1	REC	2/34	13/258	0.6913
1	BTB-01285245	62673903	1	0.5556	0.4059	2	0.02179	1.83		1	BTB-01285245	1	2	DOM	29/7	174/97	0.06084		1	BTB-01285245	1	2	REC	11/25	46/225	0.06581
1	Hapmap60296-rs29016002	62715096	1	0.6	0.4723	2	0.05613	1.676		1	Hapmap60296-rs29016002	1	2	DOM	30/5	192/79	0.07129		1	Hapmap60296-rs29016002	1	2	REC	12/23	64/207	0.2109
1	Hapmap49510-BTA-17452	62768510	1	0.2778	0.2546	2	0.6685	1.126		1	Hapmap49510-BTA-17452	1	2	DOM	16/20	126/145	0.8603		1	Hapmap49510-BTA-17452	1	2	REC	4/32	12/259	0.1034
1	ARS-BFGL-NGS-4583	62817866	1	0.5694	0.4576	2	0.07943	1.568		1	ARS-BFGL-NGS-4583	1	2	DOM	29/7	195/76	0.3229		1	ARS-BFGL-NGS-4583	1	2	REC	12/24	53/218	0.07987
1	BTA-32633-no-rs	62841878	1	0.1667	0.1347	2	0.4679	1.285		1	BTA-32633-no-rs	1	2	DOM	11/25	63/208	0.4061		1	BTA-32633-no-rs	1	2	REC	1/35	10/261	1
1	BovineHD0100017984	62855706	2	0.2917	0.4333	1	0.02234	0.5385		1	BovineHD0100017984	2	1	DOM	18/18	182/88	0.06072		1	BovineHD0100017984	2	1	REC	3/33	52/218	0.1629
1	BovineHD0100017999	62900770	2	0.4306	0.3481	1	0.1909	1.416		1	BovineHD0100017999	2	1	DOM	25/11	164/106	0.3642		1	BovineHD0100017999	2	1	REC	6/30	24/246	0.1416
1	Hapmap24328-BTA-108938	62924157	2	0.3429	0.428	1	0.1986	0.6972		1	Hapmap24328-BTA-108938	2	1	DOM	19/16	189/82	0.08249		1	Hapmap24328-BTA-108938	2	1	REC	5/30	43/228	1
1	BTA-108948-no-rs	62972124	1	0.08333	0.06089	2	0.4413	1.402		1	BTA-108948-no-rs	1	2	DOM	6/30	33/238	0.4285		1	BTA-108948-no-rs	1	2	REC	0/36	0/271	1
1	BTA-101821-no-rs	63032317	2	0.2639	0.2343	1	0.5588	1.171		1	BTA-101821-no-rs	2	1	DOM	16/20	113/158	0.8577		1	BTA-101821-no-rs	2	1	REC	3/33	14/257	0.4329
1	BovineHD0100018022	63041158	2	0.2639	0.3796	1	0.06774	0.5858		1	BovineHD0100018022	2	1	DOM	16/20	176/94	0.0264		1	BovineHD0100018022	2	1	REC	3/33	29/241	1
1	ARS-BFGL-NGS-116361	63103154	1	0.2639	0.2343	2	0.5588	1.171		1	ARS-BFGL-NGS-116361	1	2	DOM	16/20	113/158	0.8577		1	ARS-BFGL-NGS-116361	1	2	REC	3/33	14/257	0.4329
1	Hapmap49061-BTA-122268	63139698	2	0.4028	0.5	1	0.133	0.6744		1	Hapmap49061-BTA-122268	2	1	DOM	22/14	208/63	0.06328		1	Hapmap49061-BTA-122268	2	1	REC	7/29	63/208	0.6787
1	BovineHD0100018044	63162754	2	0.4143	0.3611	1	0.4295	1.251		1	BovineHD0100018044	2	1	DOM	21/14	165/105	1		1	BovineHD0100018044	2	1	REC	8/27	30/240	0.05789
1	ARS-BFGL-NGS-44433	63196236	1	0.5417	0.4594	2	0.2096	1.391		1	ARS-BFGL-NGS-44433	1	2	DOM	28/8	200/71	0.689		1	ARS-BFGL-NGS-44433	1	2	REC	11/25	49/222	0.1141
1	Hapmap44333-BTA-104611	63222337	2	0.4444	0.3635	1	0.1957	1.401		1	Hapmap44333-BTA-104611	2	1	DOM	25/11	164/107	0.3636		1	Hapmap44333-BTA-104611	2	1	REC	7/29	33/238	0.2875
1	BovineHD0100018062	63256956	1	0.3333	0.4446	2	0.07736	0.6245		1	BovineHD0100018062	1	2	DOM	21/15	198/73	0.078		1	BovineHD0100018062	1	2	REC	3/33	43/228	0.3221
1	ARS-BFGL-NGS-105436	63346740	1	0.3472	0.3118	2	0.5897	1.174		1	ARS-BFGL-NGS-105436	1	2	DOM	20/16	149/122	1		1	ARS-BFGL-NGS-105436	1	2	REC	5/31	20/251	0.1919
1	ARS-BFGL-NGS-3132	63427104	2	0.1111	0.1181	1	1	0.9336		1	ARS-BFGL-NGS-3132	2	1	DOM	8/28	63/208	1		1	ARS-BFGL-NGS-3132	2	1	REC	0/36	1/270	1
1	BTB-00640138	63473042	2	0.1667	0.3395	1	0.002876	0.3891		1	BTB-00640138	2	1	DOM	9/27	156/115	0.000287		1	BTB-00640138	2	1	REC	3/33	28/243	1
1	BTB-00639971	63540783	1	0.1389	0.1218	2	0.7029	1.163		1	BTB-00639971	1	2	DOM	9/27	62/209	0.8336		1	BTB-00639971	1	2	REC	1/35	4/267	0.4664
1	Hapmap31089-BTA-130737	63602126	1	0.1389	0.06089	2	0.02412	2.488		1	Hapmap31089-BTA-130737	1	2	DOM	9/27	32/239	0.03757		1	Hapmap31089-BTA-130737	1	2	REC	1/35	1/270	0.2211
1	BTB-01687859	63694804	2	0.4306	0.3856	1	0.5207	1.205		1	BTB-01687859	2	1	DOM	24/12	172/99	0.8538		1	BTB-01687859	2	1	REC	7/29	37/234	0.3216
1	BovineHD0100018165	63716985	1	0.3	0.2007	2	0.06268	1.706		1	BovineHD0100018165	1	2	DOM	18/17	96/173	0.09382		1	BovineHD0100018165	1	2	REC	3/32	12/257	0.3945
1	BovineHD0100018178	63749969	2	0.2857	0.2519	1	0.5611	1.188		1	BovineHD0100018178	2	1	DOM	16/19	123/147	1		1	BovineHD0100018178	2	1	REC	4/31	13/257	0.1165
1	ARS-BFGL-NGS-27619	63879508	2	0.3472	0.2712	1	0.2082	1.429		1	ARS-BFGL-NGS-27619	2	1	DOM	20/16	130/141	0.4785		1	ARS-BFGL-NGS-27619	2	1	REC	5/31	17/254	0.157
1	BovineHD0100018250	63914263	2	0.5857	0.4796	1	0.1	1.534		1	BovineHD0100018250	2	1	DOM	26/9	201/69	1		1	BovineHD0100018250	2	1	REC	15/20	58/212	0.01013
1	BovineHD0100018262	63978104	2	0.4857	0.4033	1	0.1986	1.397		1	BovineHD0100018262	2	1	DOM	26/9	182/87	0.5623		1	BovineHD0100018262	2	1	REC	8/27	35/234	0.1243
1	BovineHD0100018263	63981310	2	0.4857	0.4033	1	0.1986	1.397		1	BovineHD0100018263	2	1	DOM	26/9	182/87	0.5623		1	BovineHD0100018263	2	1	REC	8/27	35/234	0.1243
1	BTB-00451094	64034192	1	0.4861	0.4059	2	0.2048	1.385		1	BTB-00451094	1	2	DOM	27/9	184/87	0.4483		1	BTB-00451094	1	2	REC	8/28	36/235	0.2011
1	BovineHD0100018286	64041973	1	0.3143	0.2444	2	0.2414	1.417		1	BovineHD0100018286	1	2	DOM	18/17	118/152	0.4703		1	BovineHD0100018286	1	2	REC	4/31	14/256	0.1377
1	BTB-00033025	64072711	2	0.1389	0.1052	1	0.4194	1.372		1	BTB-00033025	2	1	DOM	10/26	53/218	0.2729		1	BTB-00033025	2	1	REC	0/36	4/267	1
1	ARS-BFGL-NGS-10860	64097352	2	0.08333	0.238	1	0.002173	0.2911		1	ARS-BFGL-NGS-10860	2	1	DOM	5/31	119/152	0.0004611		1	ARS-BFGL-NGS-10860	2	1	REC	1/35	10/261	1
1	BovineHD0100018302	64119388	1	0.2571	0.2037	2	0.3485	1.353		1	BovineHD0100018302	1	2	DOM	15/20	102/168	0.5829		1	BovineHD0100018302	1	2	REC	3/32	8/262	0.1199
1	BovineHD0100018309	64142274	1	0.2143	0.1691	2	0.4014	1.34		1	BovineHD0100018309	1	2	DOM	13/22	84/185	0.5633		1	BovineHD0100018309	1	2	REC	2/33	7/262	0.2775
1	ARS-BFGL-NGS-71757	64171919	1	0.4861	0.3819	2	0.09611	1.531		1	ARS-BFGL-NGS-71757	1	2	DOM	24/12	167/104	0.5893		1	ARS-BFGL-NGS-71757	1	2	REC	11/25	40/231	0.02887
1	BovineHD0100018320	64178623	1	0.2429	0.1903	2	0.3364	1.365		1	BovineHD0100018320	1	2	DOM	14/21	91/177	0.5713		1	BovineHD0100018320	1	2	REC	3/32	11/257	0.2111
1	BTB-00033090	64193131	2	0.3472	0.2804	1	0.268	1.365		1	BTB-00033090	2	1	DOM	20/16	131/140	0.4795		1	BTB-00033090	2	1	REC	5/31	21/250	0.2075
1	BovineHD0100018326	64201222	2	0.2429	0.187	1	0.263	1.394		1	BovineHD0100018326	2	1	DOM	15/20	92/178	0.3477		1	BovineHD0100018326	2	1	REC	2/33	9/261	0.3663
1	BTB-00033167	64268930	2	0.2917	0.19	1	0.05941	1.755		1	BTB-00033167	2	1	DOM	17/19	94/177	0.145		1	BTB-00033167	2	1	REC	4/32	9/262	0.05268
1	BTB-00026837	64391625	2	0.3194	0.2915	1	0.68	1.141		1	BTB-00026837	2	1	DOM	21/15	138/133	0.4788		1	BTB-00026837	2	1	REC	2/34	20/251	1
1	BovineHD0100018387	64403989	1	0.3472	0.4389	2	0.1633	0.68		1	BovineHD0100018387	1	2	DOM	19/17	190/80	0.0375		1	BovineHD0100018387	1	2	REC	6/30	47/223	1
1	ARS-BFGL-NGS-33635	64483369	2	0.5556	0.4465	1	0.1013	1.55		1	ARS-BFGL-NGS-33635	2	1	DOM	26/10	191/80	1		1	ARS-BFGL-NGS-33635	2	1	REC	14/22	51/220	0.008869
1	BTB-00027056	64527662	1	0.5972	0.4834	2	0.07917	1.585		1	BTB-00027056	1	2	DOM	29/7	196/75	0.4222		1	BTB-00027056	1	2	REC	14/22	66/205	0.07043
1	BovineHD0100018415	64547926	1	0.2857	0.4704	2	0.003321	0.4504		1	BovineHD0100018415	1	2	DOM	17/18	191/79	0.01157		1	BovineHD0100018415	1	2	REC	3/32	63/207	0.04977
1	BovineHD0100018416	64552297	1	0.1286	0.2778	2	0.005954	0.3836		1	BovineHD0100018416	1	2	DOM	7/28	138/132	0.0005167		1	BovineHD0100018416	1	2	REC	2/33	12/258	0.6675
1	BTA-15412-no-rs	64572534	2	0.02778	0.02768	1	1	1.004		1	BTA-15412-no-rs	2	1	DOM	2/34	15/256	1		1	BTA-15412-no-rs	2	1	REC	0/36	0/271	1
1	ARS-BFGL-NGS-112600	64627775	2	0.5972	0.4779	1	0.06067	1.62		1	ARS-BFGL-NGS-112600	2	1	DOM	29/7	196/75	0.4222		1	ARS-BFGL-NGS-112600	2	1	REC	14/22	63/208	0.06328
1	BovineHD0100018434	64645261	2	0.3472	0.4424	1	0.1307	0.6705		1	BovineHD0100018434	2	1	DOM	21/15	187/82	0.186		1	BovineHD0100018434	2	1	REC	4/32	51/218	0.3557
1	BTB-00027149	64679107	2	0.375	0.476	1	0.1309	0.6605		1	BTB-00027149	2	1	DOM	22/14	198/73	0.1673		1	BTB-00027149	2	1	REC	5/31	60/211	0.384
1	BTB-00027201	64736792	2	0.2778	0.3948	1	0.06996	0.5895		1	BTB-00027201	2	1	DOM	17/19	175/96	0.06547		1	BTB-00027201	2	1	REC	3/33	39/232	0.4417
1	BovineHD0100018462	64769230	1	0.1857	0.1315	2	0.2666	1.507		1	BovineHD0100018462	1	2	DOM	12/23	65/205	0.2153		1	BovineHD0100018462	1	2	REC	1/34	6/264	0.5778
1	BovineHD0100018473	64823955	1	0.2778	0.4015	2	0.05275	0.5734		1	BovineHD0100018473	1	2	DOM	17/19	177/92	0.04135		1	BovineHD0100018473	1	2	REC	3/33	39/230	0.4416
1	BTB-00027298	64831957	2	0.1806	0.131	1	0.2724	1.462		1	BTB-00027298	2	1	DOM	12/24	65/206	0.2251		1	BTB-00027298	2	1	REC	1/35	6/265	0.5862
1	BTB-00027332	64864876	2	0.1528	0.1273	1	0.5756	1.236		1	BTB-00027332	2	1	DOM	11/25	63/208	0.4061		1	BTB-00027332	2	1	REC	0/36	6/265	1
1	BTB-00027405	64893868	2	0.09722	0.0572	1	0.1918	1.775		1	BTB-00027405	2	1	DOM	7/29	31/240	0.1794		1	BTB-00027405	2	1	REC	0/36	0/271	1
1	Hapmap42852-BTA-15416	64920298	1	0.09722	0.0572	2	0.1918	1.775		1	Hapmap42852-BTA-15416	1	2	DOM	7/29	31/240	0.1794		1	Hapmap42852-BTA-15416	1	2	REC	0/36	0/271	1
1	BovineHD0100018503	64935538	2	0.2778	0.4	1	0.0529	0.5769		1	BovineHD0100018503	2	1	DOM	17/19	177/93	0.04203		1	BovineHD0100018503	2	1	REC	3/33	39/231	0.4416
1	Hapmap32539-BTA-124026	64978225	1	0.09722	0.0572	2	0.1918	1.775		1	Hapmap32539-BTA-124026	1	2	DOM	7/29	31/240	0.1794		1	Hapmap32539-BTA-124026	1	2	REC	0/36	0/271	1
1	Hapmap55251-rs29014781	65022321	1	0.4306	0.3893	2	0.5225	1.186		1	Hapmap55251-rs29014781	1	2	DOM	24/12	175/96	0.8548		1	Hapmap55251-rs29014781	1	2	REC	7/29	36/235	0.3109
1	BovineHD0100018526	65041833	1	0.1429	0.1059	2	0.4148	1.406		1	BovineHD0100018526	1	2	DOM	7/28	56/213	1		1	BovineHD0100018526	1	2	REC	3/32	1/268	0.005197
1	BTA-15421-no-rs	65061689	1	0.4306	0.387	2	0.5211	1.197		1	BTA-15421-no-rs	1	2	DOM	24/12	174/96	0.8545		1	BTA-15421-no-rs	1	2	REC	7/29	35/235	0.3026
1	BovineHD0100018538	65090781	1	0.3143	0.2602	2	0.3883	1.303		1	BovineHD0100018538	1	2	DOM	17/18	125/144	0.8583		1	BovineHD0100018538	1	2	REC	5/30	15/254	0.06497
1	BovineHD0100018540	65098749	2	0.4429	0.3907	1	0.4367	1.239		1	BovineHD0100018540	2	1	DOM	24/11	175/95	0.7102		1	BovineHD0100018540	2	1	REC	7/28	36/234	0.3019
1	BovineHD0100018544	65119095	2	0.4429	0.3885	1	0.4357	1.251		1	BovineHD0100018544	2	1	DOM	24/11	174/95	0.7097		1	BovineHD0100018544	2	1	REC	7/28	35/234	0.295
1	BTB-00027516	65165222	1	0.2083	0.1587	2	0.3095	1.395		1	BTB-00027516	1	2	DOM	12/24	81/190	0.7011		1	BTB-00027516	1	2	REC	3/33	5/266	0.05493
1	BovineHD0100018558	65173401	2	0.5139	0.4315	1	0.207	1.393		1	BovineHD0100018558	2	1	DOM	27/9	192/78	0.6981		1	BovineHD0100018558	2	1	REC	10/26	41/229	0.09149
1	ARS-BFGL-NGS-61496	65216449	1	0.2714	0.1926	2	0.1527	1.562		1	ARS-BFGL-NGS-61496	1	2	DOM	16/19	90/180	0.1861		1	ARS-BFGL-NGS-61496	1	2	REC	3/32	14/256	0.426
1	ARS-BFGL-NGS-83021	65333436	2	0.5833	0.4613	1	0.05949	1.635		1	ARS-BFGL-NGS-83021	2	1	DOM	29/7	192/79	0.3226		1	ARS-BFGL-NGS-83021	2	1	REC	13/23	58/213	0.05881
1	BovineHD0100018613	65366689	2	0.3611	0.25	1	0.04729	1.696		1	BovineHD0100018613	2	1	DOM	21/15	121/149	0.1549		1	BovineHD0100018613	2	1	REC	5/31	14/256	0.05779
1	BTB-02069463	65413028	2	0.3611	0.3524	1	0.8961	1.039		1	BTB-02069463	2	1	DOM	21/15	158/113	1		1	BTB-02069463	2	1	REC	5/31	33/238	0.7875
1	ARS-BFGL-NGS-3996	65517170	2	0.3333	0.4576	1	0.0577	0.5927		1	ARS-BFGL-NGS-3996	2	1	DOM	20/16	193/78	0.08153		1	ARS-BFGL-NGS-3996	2	1	REC	4/32	55/216	0.2603
1	ARS-BFGL-NGS-115763	65535489	1	0.4167	0.5	2	0.21	0.7143		1	ARS-BFGL-NGS-115763	1	2	DOM	23/13	207/64	0.15		1	ARS-BFGL-NGS-115763	1	2	REC	7/29	64/207	0.6775
1	ARS-BFGL-NGS-43799	65583709	2	0.4028	0.3413	1	0.3568	1.301		1	ARS-BFGL-NGS-43799	2	1	DOM	21/15	154/117	1		1	ARS-BFGL-NGS-43799	2	1	REC	8/28	31/240	0.104
1	Hapmap40403-BTA-15429	65625274	1	0.3472	0.4742	2	0.04464	0.5899		1	Hapmap40403-BTA-15429	1	2	DOM	22/14	195/76	0.179		1	Hapmap40403-BTA-15429	1	2	REC	3/33	62/209	0.05015
1	ARS-BFGL-BAC-19439	65647815	2	0.05556	0.04244	1	0.5442	1.327		1	ARS-BFGL-BAC-19439	2	1	DOM	4/32	23/248	0.5381		1	ARS-BFGL-BAC-19439	2	1	REC	0/36	0/271	1
1	ARS-BFGL-BAC-19440	65738282	1	0.08333	0.107	2	0.6824	0.7586		1	ARS-BFGL-BAC-19440	1	2	DOM	6/30	57/214	0.6633		1	ARS-BFGL-BAC-19440	1	2	REC	0/36	1/270	1
1	BTB-00027638	65763047	1	0.6111	0.4631	2	0.02337	1.822		1	BTB-00027638	1	2	DOM	32/4	188/83	0.01691		1	BTB-00027638	1	2	REC	12/24	63/208	0.2152
1	ARS-BFGL-NGS-111569	65792796	1	0.5417	0.4151	2	0.04358	1.665		1	ARS-BFGL-NGS-111569	1	2	DOM	28/8	178/93	0.1867		1	ARS-BFGL-NGS-111569	1	2	REC	11/25	47/224	0.06953
1	BovineHD0100018708	65801483	2	0.3714	0.466	1	0.1601	0.677		1	BovineHD0100018708	2	1	DOM	20/15	199/66	0.04075		1	BovineHD0100018708	2	1	REC	6/29	48/217	1
1	BovineHD0100018723	65838513	2	0.5417	0.4151	1	0.04358	1.665		1	BovineHD0100018723	2	1	DOM	28/8	178/93	0.1867		1	BovineHD0100018723	2	1	REC	11/25	47/224	0.06953
1	BovineHD0100018775	65943436	2	0.4722	0.4185	1	0.4466	1.243		1	BovineHD0100018775	2	1	DOM	24/12	186/84	0.8488		1	BovineHD0100018775	2	1	REC	10/26	40/230	0.05655
1	BovineHD0100018783	65952684	2	0.4429	0.3284	1	0.06161	1.626		1	BovineHD0100018783	2	1	DOM	23/12	152/116	0.3652		1	BovineHD0100018783	2	1	REC	8/27	24/244	0.01927
1	BTA-33604-no-rs	66059883	1	0.4722	0.4188	2	0.4467	1.242		1	BTA-33604-no-rs	1	2	DOM	24/12	186/85	0.8494		1	BTA-33604-no-rs	1	2	REC	10/26	41/230	0.09115
1	ARS-BFGL-NGS-117561	66087781	2	0.3611	0.3339	1	0.691	1.127		1	ARS-BFGL-NGS-117561	2	1	DOM	20/16	153/118	1		1	ARS-BFGL-NGS-117561	2	1	REC	6/30	28/243	0.2594
1	BovineHD0100018849	66092451	1	0.3143	0.2463	2	0.2429	1.403		1	BovineHD0100018849	1	2	DOM	17/18	111/157	0.4688		1	BovineHD0100018849	1	2	REC	5/30	21/247	0.2011
1	ARS-BFGL-NGS-14087	66112842	2	0.08333	0.06273	1	0.4516	1.358		1	ARS-BFGL-NGS-14087	2	1	DOM	6/30	33/238	0.4285		1	ARS-BFGL-NGS-14087	2	1	REC	0/36	1/270	1
1	BovineHD4100000370	66133173	1	0.4306	0.3513	2	0.1936	1.396		1	BovineHD4100000370	1	2	DOM	25/11	157/112	0.2776		1	BovineHD4100000370	1	2	REC	6/30	32/237	0.421
1	Hapmap54041-ss46526276	66150690	1	0.4444	0.3948	2	0.4439	1.226		1	Hapmap54041-ss46526276	1	2	DOM	25/11	176/95	0.71		1	Hapmap54041-ss46526276	1	2	REC	7/29	38/233	0.4496
1	BovineHD0100018869	66184432	1	0.3824	0.3289	2	0.4133	1.263		1	BovineHD0100018869	1	2	DOM	20/14	154/109	1		1	BovineHD0100018869	1	2	REC	6/28	19/244	0.0506
1	ARS-BFGL-NGS-36705	66188904	2	0.2222	0.1771	1	0.3342	1.327		1	ARS-BFGL-NGS-36705	2	1	DOM	15/21	86/185	0.2591		1	ARS-BFGL-NGS-36705	2	1	REC	1/35	10/261	1
1	BovineHD0100018875	66211180	2	0.375	0.4871	1	0.07943	0.6318		1	BovineHD0100018875	2	1	DOM	20/16	208/63	0.01341		1	BovineHD0100018875	2	1	REC	7/29	56/215	1
1	Hapmap51211-BTA-33586	66258464	2	0.01389	0.03321	1	0.7139	0.41		1	Hapmap51211-BTA-33586	2	1	DOM	1/35	18/253	0.7099		1	Hapmap51211-BTA-33586	2	1	REC	0/36	0/271	1
1	BovineHD0100018903	66364954	2	0.1528	0.1089	1	0.3213	1.476		1	BovineHD0100018903	2	1	DOM	11/25	57/214	0.2035		1	BovineHD0100018903	2	1	REC	0/36	2/269	1
1	BovineHD0100018914	66441391	2	0.1806	0.2159	1	0.5427	0.8004		1	BovineHD0100018914	2	1	DOM	10/26	104/167	0.2715		1	BovineHD0100018914	2	1	REC	3/33	13/258	0.4142
1	ARS-BFGL-NGS-103348	66454562	2	0.01389	0.02399	1	1	0.5731		1	ARS-BFGL-NGS-103348	2	1	DOM	1/35	13/258	1		1	ARS-BFGL-NGS-103348	2	1	REC	0/36	0/271	1
1	BTB-00032648	66515809	1	0.2917	0.19	2	0.05941	1.755		1	BTB-00032648	1	2	DOM	18/18	95/176	0.09789		1	BTB-00032648	1	2	REC	3/33	8/263	0.1262
1	BovineHD0100018938	66539914	1	0.625	0.441	2	0.003716	2.113		1	BovineHD0100018938	1	2	DOM	29/7	182/89	0.1265		1	BovineHD0100018938	1	2	REC	16/20	57/214	0.003363
1	BTB-00033186	66560130	2	0.3194	0.4834	1	0.01149	0.5016		1	BTB-00033186	2	1	DOM	18/18	197/74	0.01068		1	BTB-00033186	2	1	REC	5/31	65/206	0.2088
1	ARS-BFGL-NGS-4572	66612166	1	0.6111	0.4539	2	0.01652	1.891		1	ARS-BFGL-NGS-4572	1	2	DOM	32/4	193/78	0.02656		1	ARS-BFGL-NGS-4572	1	2	REC	12/24	53/218	0.07987
1	BTB-00032574	66657113	2	0.06944	0.08118	1	1	0.8446		1	BTB-00032574	2	1	DOM	5/31	44/227	1		1	BTB-00032574	2	1	REC	0/36	0/271	1
1	ARS-BFGL-NGS-6075	66686171	2	0.3333	0.321	1	0.8933	1.057		1	ARS-BFGL-NGS-6075	2	1	DOM	20/16	153/118	1		1	ARS-BFGL-NGS-6075	2	1	REC	4/32	21/250	0.5131
1	BTB-00026096	66710186	1	0.4028	0.3524	2	0.4333	1.239		1	BTB-00026096	1	2	DOM	22/14	163/108	1		1	BTB-00026096	1	2	REC	7/29	28/243	0.1561
1	BTB-00026110	66731706	2	0.125	0.07934	1	0.1816	1.658		1	BTB-00026110	2	1	DOM	7/29	41/230	0.4705		1	BTB-00026110	2	1	REC	2/34	2/269	0.069
1	BTA-31636-no-rs	66799487	2	0.3194	0.3782	1	0.3653	0.7716		1	BTA-31636-no-rs	2	1	DOM	17/19	171/100	0.07131		1	BTA-31636-no-rs	2	1	REC	6/30	34/237	0.4395
1	BTA-05186-no-rs	66862192	2	0.2917	0.2066	1	0.1265	1.581		1	BTA-05186-no-rs	2	1	DOM	19/17	103/168	0.1036		1	BTA-05186-no-rs	2	1	REC	2/34	9/262	0.6245
1	BTB-00028704	66890930	2	0.25	0.1531	1	0.04288	1.843		1	BTB-00028704	2	1	DOM	16/20	77/194	0.05532		1	BTB-00028704	2	1	REC	2/34	6/265	0.2386
1	BovineHD0100019073	67069288	1	0.1389	0.1089	2	0.4295	1.32		1	BovineHD0100019073	1	2	DOM	9/27	55/216	0.5155		1	BovineHD0100019073	1	2	REC	1/35	4/267	0.4664
1	UA-IFASA-7116	67101935	2	0.1667	0.1144	1	0.2451	1.548		1	UA-IFASA-7116	2	1	DOM	11/25	59/212	0.2892		1	UA-IFASA-7116	2	1	REC	1/35	3/268	0.3944
1	BTB-00032205	67133845	1	0.1944	0.1365	2	0.209	1.527		1	BTB-00032205	1	2	DOM	13/23	70/201	0.2302		1	BTB-00032205	1	2	REC	1/35	4/267	0.4664
1	BTB-00032200	67163792	2	0.1806	0.2897	1	0.06745	0.5403		1	BTB-00032200	2	1	DOM	12/24	139/132	0.05106		1	BTB-00032200	2	1	REC	1/35	18/253	0.7099
1	BTB-00032163	67192418	1	0.4722	0.4207	2	0.4474	1.232		1	BTB-00032163	1	2	DOM	26/10	179/92	0.573		1	BTB-00032163	1	2	REC	8/28	49/222	0.5026
1	BTB-00032153	67213671	1	0.2222	0.1808	2	0.4199	1.294		1	BTB-00032153	1	2	DOM	15/21	90/181	0.3513		1	BTB-00032153	1	2	REC	1/35	8/263	1
1	BovineHD0100019121	67264350	2	0.2857	0.3396	1	0.4198	0.778		1	BovineHD0100019121	2	1	DOM	17/18	155/113	0.3648		1	BovineHD0100019121	2	1	REC	3/32	27/241	1
1	Hapmap58284-rs29018937	67284880	1	0.4722	0.3801	2	0.1571	1.459		1	Hapmap58284-rs29018937	1	2	DOM	26/10	164/107	0.2035		1	Hapmap58284-rs29018937	1	2	REC	8/28	42/229	0.3357
1	BTA-33571-no-rs	67309126	1	0.2222	0.1808	2	0.4199	1.294		1	BTA-33571-no-rs	1	2	DOM	15/21	90/181	0.3513		1	BTA-33571-no-rs	1	2	REC	1/35	8/263	1
1	BovineHD0100019150	67330069	2	0.4306	0.4871	1	0.3823	0.7962		1	BovineHD0100019150	2	1	DOM	24/12	210/61	0.1512		1	BovineHD0100019150	2	1	REC	7/29	54/217	1
1	ARS-BFGL-NGS-119133	67369224	1	0.1667	0.2528	2	0.1425	0.5912		1	ARS-BFGL-NGS-119133	1	2	DOM	11/25	124/147	0.1074		1	ARS-BFGL-NGS-119133	1	2	REC	1/35	13/258	1
1	Hapmap41826-BTA-31654	67423265	2	0.5139	0.4576	1	0.3812	1.253		1	Hapmap41826-BTA-31654	2	1	DOM	30/6	193/78	0.1636		1	Hapmap41826-BTA-31654	2	1	REC	7/29	55/216	1
1	BovineHD0100019190	67444738	1	0.1714	0.1343	2	0.3642	1.333		1	BovineHD0100019190	1	2	DOM	10/25	71/197	0.8396		1	BovineHD0100019190	1	2	REC	2/33	1/267	0.03616
1	ARS-BFGL-NGS-117312	67466120	1	0.4167	0.4705	2	0.4508	0.8039		1	ARS-BFGL-NGS-117312	1	2	DOM	25/11	206/65	0.413		1	ARS-BFGL-NGS-117312	1	2	REC	5/31	49/222	0.6463
1	BovineHD0100019214	67502529	1	0.4861	0.3616	2	0.05155	1.67		1	BovineHD0100019214	1	2	DOM	26/10	168/103	0.2725		1	BovineHD0100019214	1	2	REC	9/27	28/243	0.02428
1	Hapmap59754-rs29024892	67577109	2	0.3333	0.3856	1	0.4391	0.7967		1	Hapmap59754-rs29024892	2	1	DOM	18/18	173/98	0.1424		1	Hapmap59754-rs29024892	2	1	REC	6/30	36/235	0.6053
1	ARS-BFGL-NGS-7521	67672926	1	0.3611	0.4299	2	0.31	0.7496		1	ARS-BFGL-NGS-7521	1	2	DOM	20/16	186/85	0.1323		1	ARS-BFGL-NGS-7521	1	2	REC	6/30	47/224	1
1	ARS-BFGL-NGS-4503	67711822	2	0.5278	0.4649	1	0.3186	1.286		1	ARS-BFGL-NGS-4503	2	1	DOM	30/6	197/74	0.2257		1	ARS-BFGL-NGS-4503	2	1	REC	8/28	55/216	0.8264
1	BovineHD0100019327	67798278	1	0.4	0.2668	2	0.02384	1.832		1	BovineHD0100019327	1	2	DOM	24/11	126/142	0.01929		1	BovineHD0100019327	1	2	REC	4/31	17/251	0.2822
1	Hapmap46988-BTA-34591	67805608	1	0.1806	0.1347	2	0.2816	1.416		1	Hapmap46988-BTA-34591	1	2	DOM	13/23	67/204	0.1588		1	Hapmap46988-BTA-34591	1	2	REC	0/36	6/265	1
1	ARS-BFGL-NGS-111491	67859165	2	0.4583	0.3635	1	0.1219	1.482		1	ARS-BFGL-NGS-111491	2	1	DOM	26/10	164/107	0.2035		1	ARS-BFGL-NGS-111491	2	1	REC	7/29	33/238	0.2875
1	Hapmap50666-BTA-34589	67935062	2	0.4583	0.3635	1	0.1219	1.482		1	Hapmap50666-BTA-34589	2	1	DOM	26/10	164/107	0.2035		1	Hapmap50666-BTA-34589	2	1	REC	7/29	33/238	0.2875
1	Hapmap39647-BTA-34584	68006692	2	0.1667	0.1365	1	0.4721	1.265		1	Hapmap39647-BTA-34584	2	1	DOM	12/24	67/204	0.3101		1	Hapmap39647-BTA-34584	2	1	REC	0/36	7/264	1
1	BovineHD0100019390	68014145	2	0.375	0.5056	1	0.04436	0.5868		1	BovineHD0100019390	2	1	DOM	23/13	202/68	0.1648		1	BovineHD0100019390	2	1	REC	4/32	71/199	0.06153
1	BovineHD0100019406	68043046	2	0.1714	0.07463	1	0.01151	2.566		1	BovineHD0100019406	2	1	DOM	11/24	40/228	0.02724		1	BovineHD0100019406	2	1	REC	1/34	0/268	0.1155
1	BovineHD0100019431	68110104	2	0.01389	0.04244	1	0.3424	0.3178		1	BovineHD0100019431	2	1	DOM	1/35	22/249	0.4954		1	BovineHD0100019431	2	1	REC	0/36	1/270	1
1	BovineHD0100019449	68187404	1	0.4143	0.3526	2	0.3541	1.299		1	BovineHD0100019449	1	2	DOM	22/13	149/119	0.4714		1	BovineHD0100019449	1	2	REC	7/28	40/228	0.4566
1	BovineHD0100019456	68229277	2	0.5417	0.4373	1	0.1021	1.521		1	BovineHD0100019456	2	1	DOM	30/6	180/91	0.05486		1	BovineHD0100019456	2	1	REC	9/27	57/214	0.6656
1	BovineHD0100019464	68248079	1	0.3529	0.2729	2	0.1969	1.453		1	BovineHD0100019464	1	2	DOM	21/13	118/144	0.07064		1	BovineHD0100019464	1	2	REC	3/31	25/237	1
1	BovineHD0100019472	68267076	1	0.5143	0.4422	2	0.3069	1.336		1	BovineHD0100019472	1	2	DOM	30/5	188/80	0.0704		1	BovineHD0100019472	1	2	REC	6/29	49/219	1
1	ARS-BFGL-NGS-31379	68286354	1	0.5694	0.4613	2	0.1021	1.545		1	ARS-BFGL-NGS-31379	1	2	DOM	32/4	196/75	0.04082		1	ARS-BFGL-NGS-31379	1	2	REC	9/27	54/217	0.5106
1	BovineHD0100019485	68293671	2	0.05882	0.01908	1	0.06551	3.212		1	BovineHD0100019485	2	1	DOM	4/30	10/252	0.06314		1	BovineHD0100019485	2	1	REC	0/34	0/262	1
1	BovineHD0100019488	68304713	1	0.5556	0.4557	2	0.1313	1.493		1	BovineHD0100019488	1	2	DOM	31/5	193/78	0.07169		1	BovineHD0100019488	1	2	REC	9/27	54/217	0.5106
1	ARS-BFGL-NGS-26771	68417680	1	0.4028	0.3376	2	0.2924	1.323		1	ARS-BFGL-NGS-26771	1	2	DOM	26/10	151/120	0.07259		1	ARS-BFGL-NGS-26771	1	2	REC	3/33	32/239	0.7803
1	ARS-BFGL-NGS-100745	68440795	2	0.4583	0.441	1	0.8016	1.073		1	ARS-BFGL-NGS-100745	2	1	DOM	26/10	184/87	0.7044		1	ARS-BFGL-NGS-100745	2	1	REC	7/29	55/216	1
1	BTA-120514-no-rs	68465551	2	0.1667	0.1624	1	0.8666	1.032		1	BTA-120514-no-rs	2	1	DOM	12/24	81/190	0.7011		1	BTA-120514-no-rs	2	1	REC	0/36	7/264	1
1	BovineHD0100019566	68492520	2	0.5139	0.4945	1	0.8025	1.081		1	BovineHD0100019566	2	1	DOM	31/5	200/71	0.149		1	BovineHD0100019566	2	1	REC	6/30	68/203	0.307
1	Hapmap54911-rs29023069	68532921	1	0.4167	0.4982	2	0.2109	0.7196		1	Hapmap54911-rs29023069	1	2	DOM	25/11	201/70	0.5495		1	Hapmap54911-rs29023069	1	2	REC	5/31	69/202	0.1496
1	BovineHD0100019589	68572324	1	0.3611	0.3081	2	0.4175	1.269		1	BovineHD0100019589	1	2	DOM	22/14	141/130	0.3749		1	BovineHD0100019589	1	2	REC	4/32	26/245	0.7652
1	ARS-BFGL-NGS-118460	68596030	2	0.1528	0.1421	1	0.8577	1.089		1	ARS-BFGL-NGS-118460	2	1	DOM	11/25	74/197	0.6939		1	ARS-BFGL-NGS-118460	2	1	REC	0/36	3/268	1
1	ARS-BFGL-NGS-118306	68623214	1	0.375	0.3118	2	0.2842	1.324		1	ARS-BFGL-NGS-118306	1	2	DOM	22/14	143/128	0.3781		1	ARS-BFGL-NGS-118306	1	2	REC	5/31	26/245	0.3849
1	ARS-BFGL-NGS-114985	68682461	1	0.4722	0.4096	2	0.3124	1.29		1	ARS-BFGL-NGS-114985	1	2	DOM	27/9	178/93	0.3467		1	ARS-BFGL-NGS-114985	1	2	REC	7/29	44/227	0.6348
1	BovineHD0100019679	68712546	2	0.4028	0.3967	1	1	1.026		1	BovineHD0100019679	2	1	DOM	23/13	175/96	1		1	BovineHD0100019679	2	1	REC	6/30	40/231	0.8035
1	BTA-104027-no-rs	68757940	1	0.1528	0.1015	2	0.2214	1.597		1	BTA-104027-no-rs	1	2	DOM	11/25	51/220	0.1207		1	BTA-104027-no-rs	1	2	REC	0/36	4/267	1
1	BovineHD0100019701	68778928	2	0.2273	0.1455	1	0.1024	1.727		1	BovineHD0100019701	2	1	DOM	13/20	70/198	0.1466		1	BovineHD0100019701	2	1	REC	2/31	8/260	0.3013
1	ARS-BFGL-NGS-115898	68784544	2	0.4167	0.5092	1	0.1675	0.6884		1	ARS-BFGL-NGS-115898	2	1	DOM	25/11	208/63	0.4061		1	ARS-BFGL-NGS-115898	2	1	REC	5/31	68/203	0.2094
1	BovineHD0100019706	68792344	2	0.05882	0.02037	1	0.0755	3.006		1	BovineHD0100019706	2	1	DOM	4/30	11/259	0.07294		1	BovineHD0100019706	2	1	REC	0/34	0/270	1
1	BovineHD0100019715	68801039	1	0.2361	0.1421	2	0.05336	1.867		1	BovineHD0100019715	1	2	DOM	16/20	69/202	0.02751		1	BovineHD0100019715	1	2	REC	1/35	8/263	1
1	AX-18260553	68863963	1	0.3194	0.2454	2	0.1947	1.443		1	AX-18260553	1	2	DOM	20/16	116/155	0.1573		1	AX-18260553	1	2	REC	3/33	17/254	0.7157
1	Hapmap38055-BTA-120751	68873131	2	0.1528	0.1255	1	0.5731	1.257		1	Hapmap38055-BTA-120751	2	1	DOM	11/25	65/206	0.413		1	Hapmap38055-BTA-120751	2	1	REC	0/36	3/268	1
1	BovineHD0100019760	68874880	1	0.3088	0.2407	2	0.2341	1.41		1	BovineHD0100019760	1	2	DOM	18/16	113/155	0.2717		1	BovineHD0100019760	1	2	REC	3/31	16/252	0.459
1	BovineHD0100019784	68908189	1	0.2917	0.2306	2	0.3017	1.374		1	BovineHD0100019784	1	2	DOM	18/18	110/161	0.2871		1	BovineHD0100019784	1	2	REC	3/33	15/256	0.4536
1	BovineHD0100019804	68949628	2	0.1912	0.08889	1	0.01606	2.423		1	BovineHD0100019804	2	1	DOM	12/22	47/223	0.02003		1	BovineHD0100019804	2	1	REC	1/33	1/269	0.2115
1	BovineHD0100019809	68970032	2	0.2571	0.1963	1	0.2683	1.417		1	BovineHD0100019809	2	1	DOM	16/19	96/174	0.2659		1	BovineHD0100019809	2	1	REC	2/33	10/260	0.6351
1	BovineHD0100019833	69009235	1	0.06944	0.02952	2	0.08741	2.453		1	BovineHD0100019833	1	2	DOM	5/31	15/256	0.06966		1	BovineHD0100019833	1	2	REC	0/36	1/270	1
1	BovineHD0100019834	69009734	1	0.09091	0.03731	2	0.05417	2.58		1	BovineHD0100019834	1	2	DOM	6/27	20/248	0.04994		1	BovineHD0100019834	1	2	REC	0/33	0/268	1
1	BovineHD0100019837	69012232	2	0.06944	0.02399	1	0.04869	3.037		1	BovineHD0100019837	2	1	DOM	5/31	13/258	0.04598		1	BovineHD0100019837	2	1	REC	0/36	0/271	1
1	BTA-33563-no-rs	69016673	2	0.3611	0.4299	1	0.31	0.7496		1	BTA-33563-no-rs	2	1	DOM	25/11	190/81	1		1	BTA-33563-no-rs	2	1	REC	1/35	43/228	0.03989
1	BovineHD0100019855	69033809	2	0.06061	0.02052	1	0.071	3.079		1	BovineHD0100019855	2	1	DOM	4/29	11/257	0.06845		1	BovineHD0100019855	2	1	REC	0/33	0/268	1
1	ARS-USDA-AGIL-chr1-69652189-000148	69047241	1	0.07143	0.0203	2	0.0271	3.713		1	ARS-USDA-AGIL-chr1-69652189-000148	1	2	DOM	5/30	11/260	0.02525		1	ARS-USDA-AGIL-chr1-69652189-000148	1	2	REC	0/35	0/271	1
1	BovineHD0100019878	69055817	2	0.05556	0.0203	1	0.08714	2.84		1	BovineHD0100019878	2	1	DOM	4/32	11/260	0.08455		1	BovineHD0100019878	2	1	REC	0/36	0/271	1
1	Hapmap59820-rs29019798	69085458	2	0.4444	0.4262	1	0.8006	1.077		1	Hapmap59820-rs29019798	2	1	DOM	27/9	179/92	0.3471		1	Hapmap59820-rs29019798	2	1	REC	5/31	52/219	0.6477
1	BovineHD0100019911	69102381	2	0.06061	0.02222	1	0.08537	2.839		1	BovineHD0100019911	2	1	DOM	4/29	12/258	0.08257		1	BovineHD0100019911	2	1	REC	0/33	0/270	1
1	BovineHD0100019936	69152362	1	0.1471	0.1287	2	0.7022	1.167		1	BovineHD0100019936	1	2	DOM	10/24	66/202	0.5342		1	BovineHD0100019936	1	2	REC	0/34	3/265	1
1	BovineHD0100019980	69234197	2	0.2	0.2601	1	0.3094	0.711		1	BovineHD0100019980	2	1	DOM	12/23	123/148	0.2779		1	BovineHD0100019980	2	1	REC	2/33	18/253	1
1	ARS-BFGL-NGS-62687	69262270	2	0.4583	0.4244	1	0.6134	1.148		1	ARS-BFGL-NGS-62687	2	1	DOM	26/10	178/93	0.5733		1	ARS-BFGL-NGS-62687	2	1	REC	7/29	52/219	1
1	BovineHD0100019998	69266076	2	0.3889	0.4649	1	0.2575	0.7323		1	BovineHD0100019998	2	1	DOM	23/13	186/85	0.572		1	BovineHD0100019998	2	1	REC	5/31	66/205	0.2079
1	BovineHD0100020014	69294780	2	0.25	0.2761	1	0.7728	0.8739		1	BovineHD0100020014	2	1	DOM	15/19	129/139	0.7176		1	BovineHD0100020014	2	1	REC	2/32	19/249	1
1	ARS-BFGL-NGS-111716	69299662	1	0.4583	0.4373	2	0.8007	1.089		1	ARS-BFGL-NGS-111716	1	2	DOM	26/10	181/90	0.5746		1	ARS-BFGL-NGS-111716	1	2	REC	7/29	56/215	1
1	BovineHD0100020025	69320032	1	0.3611	0.3463	2	0.7938	1.067		1	BovineHD0100020025	1	2	DOM	23/13	156/114	0.5899		1	BovineHD0100020025	1	2	REC	3/33	31/239	0.7795
1	BovineHD0100020044	69372317	2	0.4429	0.3432	1	0.1116	1.521		1	BovineHD0100020044	2	1	DOM	26/9	153/118	0.04661		1	BovineHD0100020044	2	1	REC	5/30	33/238	0.7845
1	BovineHD0100020072	69488001	2	0.3286	0.3284	1	1	1.001		1	BovineHD0100020072	2	1	DOM	20/15	150/121	0.859		1	BovineHD0100020072	2	1	REC	3/32	28/243	1
1	BovineHD0100020089	69551363	1	0.09722	0.04613	2	0.08484	2.227		1	BovineHD0100020089	1	2	DOM	7/29	24/247	0.0705		1	BovineHD0100020089	1	2	REC	0/36	1/270	1
1	ARS-BFGL-NGS-111271	69554315	2	0.25	0.2675	1	0.8871	0.9126		1	ARS-BFGL-NGS-111271	2	1	DOM	16/20	130/141	0.7255		1	ARS-BFGL-NGS-111271	2	1	REC	2/34	15/256	1
1	BovineHD0100020090	69554797	1	0.4857	0.3717	2	0.06876	1.596		1	BovineHD0100020090	1	2	DOM	27/8	161/108	0.06328		1	BovineHD0100020090	1	2	REC	7/28	39/230	0.4499
1	ARS-BFGL-NGS-111283	69585403	1	0.375	0.4077	2	0.6121	0.8715		1	ARS-BFGL-NGS-111283	1	2	DOM	25/11	183/88	1		1	ARS-BFGL-NGS-111283	1	2	REC	2/34	38/233	0.1944
1	BovineHD0100020110	69613858	2	0.2857	0.3593	1	0.2868	0.7134		1	BovineHD0100020110	2	1	DOM	19/16	165/105	0.466		1	BovineHD0100020110	2	1	REC	1/34	29/241	0.2245
1	BovineHD0100020122	69664149	2	0.2857	0.3444	1	0.3505	0.7613		1	BovineHD0100020122	2	1	DOM	18/17	160/110	0.4664		1	BovineHD0100020122	2	1	REC	2/33	26/244	0.7543
1	BovineHD0100020138	69748359	2	0.08333	0.2288	1	0.003277	0.3065		1	BovineHD0100020138	2	1	DOM	6/30	108/163	0.00597		1	BovineHD0100020138	2	1	REC	0/36	16/255	0.2322
1	ARS-BFGL-NGS-103803	69802244	2	0.4167	0.3967	1	0.7981	1.086		1	ARS-BFGL-NGS-103803	2	1	DOM	25/11	179/92	0.8512		1	ARS-BFGL-NGS-103803	2	1	REC	5/31	36/235	1
1	BovineHD0100020162	69859758	1	0.3714	0.3	2	0.2707	1.379		1	BovineHD0100020162	1	2	DOM	23/12	141/129	0.1515		1	BovineHD0100020162	1	2	REC	3/32	21/249	0.7459
1	Hapmap41227-BTA-32644	69870271	2	0.2639	0.2509	1	0.775	1.07		1	Hapmap41227-BTA-32644	2	1	DOM	18/18	119/152	0.593		1	Hapmap41227-BTA-32644	2	1	REC	1/35	17/254	0.7058
1	BovineHD0100020179	69931914	1	0.5143	0.4154	2	0.1242	1.49		1	BovineHD0100020179	1	2	DOM	27/8	174/92	0.1862		1	BovineHD0100020179	1	2	REC	9/26	47/219	0.2523
1	Hapmap39468-BTA-120746	69942383	1	0.2639	0.2519	2	0.8853	1.065		1	Hapmap39468-BTA-120746	1	2	DOM	18/18	119/151	0.5931		1	Hapmap39468-BTA-120746	1	2	REC	1/35	17/253	0.7059
1	BovineHD0100020187	69979144	2	0.5143	0.4185	1	0.1577	1.471		1	BovineHD0100020187	2	1	DOM	26/9	178/92	0.4452		1	BovineHD0100020187	2	1	REC	10/25	48/222	0.1665
1	BovineHD0100020191	70001473	2	0.1571	0.1648	1	1	0.9449		1	BovineHD0100020191	2	1	DOM	11/24	81/186	1		1	BovineHD0100020191	2	1	REC	0/35	7/260	1
1	BTB-00031796	70049185	2	0.25	0.2472	1	1	1.015		1	BTB-00031796	2	1	DOM	17/19	117/154	0.7215		1	BTB-00031796	2	1	REC	1/35	17/254	0.7058
1	Hapmap59145-ss46526952	70228691	2	0.2778	0.2897	1	0.8906	0.9432		1	Hapmap59145-ss46526952	2	1	DOM	19/17	143/128	1		1	Hapmap59145-ss46526952	2	1	REC	1/35	14/257	1
1	Hapmap50667-BTA-34616	70362584	2	0.2361	0.1974	1	0.4369	1.257		1	Hapmap50667-BTA-34616	2	1	DOM	16/20	96/175	0.3569		1	Hapmap50667-BTA-34616	2	1	REC	1/35	11/260	1
1	ARS-BFGL-NGS-80523	70384365	1	0.5139	0.4834	2	0.7068	1.13		1	ARS-BFGL-NGS-80523	1	2	DOM	29/7	196/75	0.4222		1	ARS-BFGL-NGS-80523	1	2	REC	8/28	66/205	1
1	BovineHD0100020322	70392743	2	0.3143	0.3074	1	0.8914	1.033		1	BovineHD0100020322	2	1	DOM	20/15	148/122	0.8579		1	BovineHD0100020322	2	1	REC	2/33	18/252	1
1	BovineHD0100020325	70398856	2	0.4429	0.3941	1	0.4392	1.222		1	BovineHD0100020325	2	1	DOM	25/10	175/94	0.5707		1	BovineHD0100020325	2	1	REC	6/29	37/232	0.6062
1	BovineHD0100020329	70404106	1	0.4286	0.3963	2	0.6065	1.143		1	BovineHD0100020329	1	2	DOM	25/10	176/94	0.5708		1	BovineHD0100020329	1	2	REC	5/30	38/232	1
1	BovineHD0100020334	70412669	2	0.4429	0.3941	1	0.4392	1.222		1	BovineHD0100020334	2	1	DOM	25/10	175/94	0.5707		1	BovineHD0100020334	2	1	REC	6/29	37/232	0.6062
1	BovineHD0100020342	70429089	1	0.2	0.1283	2	0.1361	1.699		1	BovineHD0100020342	1	2	DOM	14/21	64/205	0.06177		1	BovineHD0100020342	1	2	REC	0/35	5/264	1
1	ARS-BFGL-NGS-119161	70459221	2	0.3472	0.4834	1	0.03264	0.5685		1	ARS-BFGL-NGS-119161	2	1	DOM	24/12	197/74	0.4363		1	ARS-BFGL-NGS-119161	2	1	REC	1/35	65/206	0.001949
1	BovineHD0100020373	70493042	2	0.4857	0.4275	1	0.3717	1.265		1	BovineHD0100020373	2	1	DOM	28/7	186/83	0.2384		1	BovineHD0100020373	2	1	REC	6/29	44/225	1
1	BovineHD0100020392	70523321	2	0.3429	0.4925	1	0.02167	0.5375		1	BovineHD0100020392	2	1	DOM	23/12	199/69	0.3112		1	BovineHD0100020392	2	1	REC	1/34	65/203	0.001912
1	BovineHD0100020393	70527905	1	0.3194	0.2325	2	0.1094	1.55		1	BovineHD0100020393	1	2	DOM	20/16	110/161	0.1063		1	BovineHD0100020393	1	2	REC	3/33	16/255	0.4759
1	BovineHD0100020394	70532358	2	0.1571	0.3086	1	0.007771	0.4178		1	BovineHD0100020394	2	1	DOM	11/24	148/121	0.01118		1	BovineHD0100020394	2	1	REC	0/35	18/251	0.2422
1	BovineHD0100020415	70559726	1	0.25	0.3653	2	0.06544	0.5791		1	BovineHD0100020415	1	2	DOM	18/18	173/98	0.1424		1	BovineHD0100020415	1	2	REC	0/36	25/246	0.05542
1	ARS-BFGL-NGS-95516	70621981	2	0.4429	0.369	1	0.2403	1.359		1	ARS-BFGL-NGS-95516	2	1	DOM	25/10	168/103	0.3528		1	ARS-BFGL-NGS-95516	2	1	REC	6/29	32/239	0.4111
1	ARS-BFGL-NGS-5124	70656139	1	0.5833	0.4834	2	0.1321	1.496		1	ARS-BFGL-NGS-5124	1	2	DOM	33/3	205/66	0.0327		1	ARS-BFGL-NGS-5124	1	2	REC	9/27	57/214	0.6656
1	BovineHD0100020477	70735271	2	0.1143	0.04428	1	0.02144	2.785		1	BovineHD0100020477	2	1	DOM	8/27	24/247	0.0182		1	BovineHD0100020477	2	1	REC	0/35	0/271	1
1	ARS-BFGL-BAC-35332	70741856	2	0.2917	0.3376	1	0.5062	0.8078		1	ARS-BFGL-BAC-35332	2	1	DOM	20/16	156/115	0.8588		1	ARS-BFGL-BAC-35332	2	1	REC	1/35	27/244	0.223
1	ARS-BFGL-NGS-97095	70823693	2	0.25	0.2232	1	0.653	1.16		1	ARS-BFGL-NGS-97095	2	1	DOM	16/20	112/159	0.7228		1	ARS-BFGL-NGS-97095	2	1	REC	2/34	9/262	0.6245
1	Hapmap43841-BTA-34601	70897439	1	0.5	0.4779	2	0.802	1.093		1	Hapmap43841-BTA-34601	1	2	DOM	29/7	200/71	0.5408		1	Hapmap43841-BTA-34601	1	2	REC	7/29	59/212	0.8325
1	AX-18269003	70935289	1	0.2361	0.1956	2	0.434	1.271		1	AX-18269003	1	2	DOM	15/21	95/176	0.4624		1	AX-18269003	1	2	REC	2/34	11/260	0.6551
1	AX-18269029	70941629	1	0.2361	0.1956	2	0.434	1.271		1	AX-18269029	1	2	DOM	15/21	95/176	0.4624		1	AX-18269029	1	2	REC	2/34	11/260	0.6551
1	BovineHD0100020535	70973829	2	0.25	0.1937	1	0.2735	1.387		1	BovineHD0100020535	2	1	DOM	16/20	94/177	0.2702		1	BovineHD0100020535	2	1	REC	2/34	11/260	0.6551
1	BovineHD0100020540	70987820	2	0.2714	0.2407	1	0.557	1.175		1	BovineHD0100020540	2	1	DOM	17/18	111/157	0.4688		1	BovineHD0100020540	2	1	REC	2/33	18/250	1
1	Hapmap40324-BTA-34602	70995564	2	0.25	0.1937	1	0.2735	1.387		1	Hapmap40324-BTA-34602	2	1	DOM	16/20	94/177	0.2702		1	Hapmap40324-BTA-34602	2	1	REC	2/34	11/260	0.6551
1	BTA-34631-no-rs	71013954	1	0.1714	0.2111	2	0.531	0.7731		1	BTA-34631-no-rs	1	2	DOM	12/23	100/170	0.853		1	BTA-34631-no-rs	1	2	REC	0/35	14/256	0.3827
1	BovineHD0100020549	71042439	2	0.2	0.2332	1	0.6504	0.822		1	BovineHD0100020549	2	1	DOM	13/22	111/157	0.7162		1	BovineHD0100020549	2	1	REC	1/34	14/254	1
1	BovineHD0100020557	71067483	1	0.2571	0.3007	2	0.4897	0.8049		1	BovineHD0100020557	1	2	DOM	17/18	135/136	1		1	BovineHD0100020557	1	2	REC	1/34	28/243	0.223
1	BovineHD0100020562	71083170	2	0.07143	0.1439	1	0.1353	0.4576		1	BovineHD0100020562	2	1	DOM	5/30	75/196	0.1039		1	BovineHD0100020562	2	1	REC	0/35	3/268	1
1	ARS-BFGL-NGS-56509	71132759	2	0.4028	0.3118	1	0.1397	1.489		1	ARS-BFGL-NGS-56509	2	1	DOM	23/13	140/131	0.2135		1	ARS-BFGL-NGS-56509	2	1	REC	6/30	29/242	0.272
1	ARS-BFGL-NGS-16910	71155649	1	0.06944	0.1421	2	0.09824	0.4507		1	ARS-BFGL-NGS-16910	1	2	DOM	5/31	74/197	0.1044		1	ARS-BFGL-NGS-16910	1	2	REC	0/36	3/268	1
1	BovineHD0100020591	71163004	2	0.2	0.1808	1	0.7424	1.133		1	BovineHD0100020591	2	1	DOM	13/22	90/181	0.7047		1	BovineHD0100020591	2	1	REC	1/34	8/263	1
1	BovineHD0100020593	71170757	1	0.1714	0.2707	2	0.08222	0.5575		1	BovineHD0100020593	1	2	DOM	12/23	135/131	0.07398		1	BovineHD0100020593	1	2	REC	0/35	9/257	0.605
1	BTA-34638-no-rs	71190486	1	0.3889	0.4539	2	0.3152	0.7657		1	BTA-34638-no-rs	1	2	DOM	25/11	192/79	0.8474		1	BTA-34638-no-rs	1	2	REC	3/33	54/217	0.1116
1	BovineHD0100020624	71301132	2	0.07143	0.1426	1	0.1343	0.4625		1	BovineHD0100020624	2	1	DOM	5/30	74/196	0.1048		1	BovineHD0100020624	2	1	REC	0/35	3/267	1
1	BTA-120754-no-rs	71322090	1	0.3611	0.2638	2	0.09219	1.577		1	BTA-120754-no-rs	1	2	DOM	24/12	130/141	0.04988		1	BTA-120754-no-rs	1	2	REC	2/34	13/258	0.6913
1	BovineHD0100020633	71338285	1	0.6	0.4815	2	0.07502	1.615		1	BovineHD0100020633	1	2	DOM	32/3	195/76	0.01284		1	BovineHD0100020633	1	2	REC	10/25	66/205	0.6776
1	BTA-34624-no-rs	71411178	2	0.3611	0.2638	1	0.09219	1.577		1	BTA-34624-no-rs	2	1	DOM	24/12	130/141	0.04988		1	BTA-34624-no-rs	2	1	REC	2/34	13/258	0.6913
1	Hapmap60655-rs29025422	71442587	2	0.09722	0.131	1	0.5713	0.7144		1	Hapmap60655-rs29025422	2	1	DOM	6/30	64/207	0.4054		1	Hapmap60655-rs29025422	2	1	REC	1/35	7/264	1
1	BovineHD4100000414	71443933	1	0.2286	0.2167	2	0.8777	1.071		1	BovineHD4100000414	1	2	DOM	15/20	110/160	0.856		1	BovineHD4100000414	1	2	REC	1/34	7/263	1
1	ARS-BFGL-NGS-117761	71471058	2	0.3714	0.2343	1	0.01823	1.931		1	ARS-BFGL-NGS-117761	2	1	DOM	23/12	115/156	0.01123		1	ARS-BFGL-NGS-117761	2	1	REC	3/32	12/259	0.3934
1	ARS-BFGL-NGS-37507	71493393	2	0.08333	0.1426	1	0.2013	0.5466		1	ARS-BFGL-NGS-37507	2	1	DOM	6/30	74/196	0.2256		1	ARS-BFGL-NGS-37507	2	1	REC	0/36	3/267	1
1	BovineHD0100020685	71566792	2	0.5429	0.4777	1	0.3124	1.298		1	BovineHD0100020685	2	1	DOM	30/5	204/65	0.2846		1	BovineHD0100020685	2	1	REC	8/27	53/216	0.6561
1	BovineHD0100020689	71609698	2	0.3429	0.4312	1	0.1979	0.6882		1	BovineHD0100020689	2	1	DOM	21/14	189/80	0.2446		1	BovineHD0100020689	2	1	REC	3/32	43/226	0.3219
1	BovineHD0100020706	71741471	2	0.3429	0.2796	1	0.2651	1.344		1	BovineHD0100020706	2	1	DOM	19/16	132/138	0.5929		1	BovineHD0100020706	2	1	REC	5/30	19/251	0.172
1	Hapmap51434-BTA-34642	71760764	1	0.3472	0.2343	2	0.04221	1.738		1	Hapmap51434-BTA-34642	1	2	DOM	22/14	115/156	0.04854		1	Hapmap51434-BTA-34642	1	2	REC	3/33	12/259	0.3982
1	ARS-BFGL-NGS-118075	71834357	2	0.6389	0.4686	1	0.008138	2.006		1	ARS-BFGL-NGS-118075	2	1	DOM	35/1	197/74	0.0006432		1	ARS-BFGL-NGS-118075	2	1	REC	11/25	57/214	0.2035
1	BovineHD0100020739	71877041	2	0.3714	0.363	1	0.8955	1.037		1	BovineHD0100020739	2	1	DOM	22/13	163/107	0.8553		1	BovineHD0100020739	2	1	REC	4/31	33/237	1
1	BovineHD0100020740	71881432	1	0.1571	0.2632	2	0.05717	0.522		1	BovineHD0100020740	1	2	DOM	10/25	125/141	0.04673		1	BovineHD0100020740	1	2	REC	1/34	15/251	0.7042
1	BovineHD0100020747	71906154	2	0.4571	0.3848	1	0.245	1.347		1	BovineHD0100020747	2	1	DOM	27/8	171/98	0.1331		1	BovineHD0100020747	2	1	REC	5/30	36/233	0.797
1	BovineHD0100020749	71917411	1	0.1571	0.2622	2	0.05749	0.5247		1	BovineHD0100020749	1	2	DOM	10/25	124/143	0.04836		1	BovineHD0100020749	1	2	REC	1/34	16/251	0.7036
1	BovineHD0100020757	71943334	2	0.2286	0.1861	1	0.4188	1.296		1	BovineHD0100020757	2	1	DOM	14/21	91/175	0.5721		1	BovineHD0100020757	2	1	REC	2/33	8/258	0.3275
1	BovineHD0100020760	71952136	2	0.2143	0.1468	1	0.1589	1.585		1	BovineHD0100020760	2	1	DOM	13/22	74/195	0.2385		1	BovineHD0100020760	2	1	REC	2/33	5/264	0.187
1	BovineHD0100020767	71982562	2	0.2857	0.2948	1	1	0.957		1	BovineHD0100020767	2	1	DOM	17/18	133/135	1		1	BovineHD0100020767	2	1	REC	3/32	25/243	1
1	BovineHD0100020781	72027628	2	0.2286	0.2537	1	0.7696	0.8715		1	BovineHD0100020781	2	1	DOM	14/21	120/148	0.718		1	BovineHD0100020781	2	1	REC	2/33	16/252	1
1	ARS-BFGL-NGS-45476	72032606	1	0.2222	0.214	2	0.879	1.049		1	ARS-BFGL-NGS-45476	1	2	DOM	15/21	106/165	0.8563		1	ARS-BFGL-NGS-45476	1	2	REC	1/35	10/261	1
1	BovineHD0100020803	72074777	2	0.2857	0.3672	1	0.1886	0.6894		1	BovineHD0100020803	2	1	DOM	18/17	169/102	0.2688		1	BovineHD0100020803	2	1	REC	2/33	30/241	0.555
1	ARS-BFGL-NGS-117741	72081243	1	0.5139	0.452	2	0.3785	1.282		1	ARS-BFGL-NGS-117741	1	2	DOM	30/6	188/83	0.1163		1	ARS-BFGL-NGS-117741	1	2	REC	7/29	57/214	1
1	Hapmap42521-BTA-35582	72127960	2	0.1944	0.214	1	0.7611	0.8864		1	Hapmap42521-BTA-35582	2	1	DOM	13/23	109/162	0.7186		1	Hapmap42521-BTA-35582	2	1	REC	1/35	7/264	1
1	Hapmap43559-BTA-35576	72193451	1	0.3056	0.3229	2	0.8932	0.9227		1	Hapmap43559-BTA-35576	1	2	DOM	18/18	144/127	0.7266		1	Hapmap43559-BTA-35576	1	2	REC	4/32	31/240	1
1	ARS-BFGL-NGS-72532	72236014	1	0.3611	0.2944	2	0.2746	1.354		1	ARS-BFGL-NGS-72532	1	2	DOM	18/18	139/131	1		1	ARS-BFGL-NGS-72532	1	2	REC	8/28	20/250	0.009177
1	ARS-BFGL-NGS-118725	72355134	2	0.3472	0.3801	1	0.6077	0.8676		1	ARS-BFGL-NGS-118725	2	1	DOM	20/16	178/93	0.2671		1	ARS-BFGL-NGS-118725	2	1	REC	5/31	28/243	0.5644
1	BovineHD0100020917	72419988	2	0.1857	0.1796	1	0.8697	1.042		1	BovineHD0100020917	2	1	DOM	13/22	90/180	0.7051		1	BovineHD0100020917	2	1	REC	0/35	7/263	1
1	BovineHD0100020931	72437297	1	0.3472	0.3432	2	1	1.018		1	BovineHD0100020931	1	2	DOM	22/14	157/114	0.8575		1	BovineHD0100020931	1	2	REC	3/33	29/242	1
1	ARS-BFGL-NGS-112042	72470845	1	0.5694	0.4742	2	0.134	1.467		1	ARS-BFGL-NGS-112042	1	2	DOM	29/7	192/79	0.3226		1	ARS-BFGL-NGS-112042	1	2	REC	12/24	65/206	0.2251
1	ARS-BFGL-NGS-100698	72499306	2	0.3194	0.4225	1	0.09911	0.6416		1	ARS-BFGL-NGS-100698	2	1	DOM	22/14	183/88	0.4554		1	ARS-BFGL-NGS-100698	2	1	REC	1/35	46/225	0.02489
1	ARS-BFGL-NGS-59448	72533863	2	0.3611	0.3524	1	0.8961	1.039		1	ARS-BFGL-NGS-59448	2	1	DOM	23/13	157/114	0.5901		1	ARS-BFGL-NGS-59448	2	1	REC	3/33	34/237	0.5938
1	BovineHD0100021005	72558796	2	0.3429	0.3727	1	0.6936	0.8783		1	BovineHD0100021005	2	1	DOM	20/15	165/102	0.5862		1	BovineHD0100021005	2	1	REC	4/31	34/233	1
1	BovineHD0100021012	72576429	2	0.3	0.3745	1	0.2379	0.7157		1	BovineHD0100021012	2	1	DOM	18/17	167/100	0.2679		1	BovineHD0100021012	2	1	REC	3/32	33/234	0.7809
1	BovineHD0100021013	72577120	1	0.3429	0.3727	2	0.6936	0.8783		1	BovineHD0100021013	1	2	DOM	20/15	165/102	0.5862		1	BovineHD0100021013	1	2	REC	4/31	34/233	1
1	BovineHD0100021016	72580910	2	0.3429	0.3727	1	0.6936	0.8783		1	BovineHD0100021016	2	1	DOM	20/15	165/102	0.5862		1	BovineHD0100021016	2	1	REC	4/31	34/233	1
1	BovineHD0100021018	72592573	2	0.3472	0.3727	1	0.6991	0.8953		1	BovineHD0100021018	2	1	DOM	21/15	167/104	0.7186		1	BovineHD0100021018	2	1	REC	4/32	35/236	1
1	Hapmap41511-BTA-34652	72631840	2	0.4722	0.4594	1	0.9	1.053		1	Hapmap41511-BTA-34652	2	1	DOM	27/9	190/81	0.6971		1	Hapmap41511-BTA-34652	2	1	REC	7/29	59/212	0.8325
1	BovineHD0100021036	72684320	2	0.3333	0.3339	1	1	0.9972		1	BovineHD0100021036	2	1	DOM	20/16	153/118	1		1	BovineHD0100021036	2	1	REC	4/32	28/243	0.7775
1	BovineHD0100021037	72688416	2	0.1857	0.3195	1	0.02632	0.4857		1	BovineHD0100021037	2	1	DOM	11/24	142/124	0.01873		1	BovineHD0100021037	2	1	REC	2/33	28/238	0.551
1	BovineHD4100000422	72695403	2	0.3429	0.2228	1	0.03542	1.82		1	BovineHD4100000422	2	1	DOM	21/14	103/164	0.0179		1	BovineHD4100000422	2	1	REC	3/32	16/251	0.4708
1	BovineHD0100021041	72703269	2	0.3333	0.3321	1	1	1.006		1	BovineHD0100021041	2	1	DOM	20/16	152/119	1		1	BovineHD0100021041	2	1	REC	4/32	28/243	0.7775
1	BovineHD4100000423	72720904	2	0.2857	0.3989	1	0.0691	0.6028		1	BovineHD4100000423	2	1	DOM	19/16	170/97	0.353		1	BovineHD4100000423	2	1	REC	1/34	43/224	0.03937
1	Hapmap40716-BTA-34647	72797154	1	0.1389	0.131	2	0.8531	1.07		1	Hapmap40716-BTA-34647	1	2	DOM	10/26	69/202	0.8393		1	Hapmap40716-BTA-34647	1	2	REC	0/36	2/269	1
1	BovineHD0100021081	72860587	1	0.1429	0.1204	2	0.5639	1.218		1	BovineHD0100021081	1	2	DOM	10/25	64/206	0.5328		1	BovineHD0100021081	1	2	REC	0/35	1/269	1
1	Hapmap35151-BES4_Contig435_1199	72880876	2	0.5286	0.4483	1	0.2512	1.38		1	Hapmap35151-BES4_Contig435_1199	2	1	DOM	28/7	187/84	0.2386		1	Hapmap35151-BES4_Contig435_1199	2	1	REC	9/26	56/215	0.5116
1	BTA-34645-no-rs	72960557	1	0.1528	0.131	2	0.5825	1.196		1	BTA-34645-no-rs	1	2	DOM	11/25	69/202	0.5457		1	BTA-34645-no-rs	1	2	REC	0/36	2/269	1
1	AX-18277826	73069219	1	0.3056	0.2066	2	0.06778	1.689		1	AX-18277826	1	2	DOM	19/17	102/169	0.1019		1	AX-18277826	1	2	REC	3/33	10/261	0.1857
1	BovineHD0100021145	73140826	1	0.375	0.5074	2	0.04418	0.5825		1	BovineHD0100021145	1	2	DOM	25/11	210/61	0.2979		1	BovineHD0100021145	1	2	REC	2/34	65/206	0.009382
1	ARS-BFGL-NGS-93288	73178671	2	0.01389	0.01476	1	1	0.9401		1	ARS-BFGL-NGS-93288	2	1	DOM	1/35	8/263	1		1	ARS-BFGL-NGS-93288	2	1	REC	0/36	0/271	1
1	ARS-BFGL-NGS-25392	73207902	2	0.08333	0.08303	1	1	1.004		1	ARS-BFGL-NGS-25392	2	1	DOM	5/31	44/227	1		1	ARS-BFGL-NGS-25392	2	1	REC	1/35	1/270	0.2211
1	Hapmap42919-BTA-35600	73274077	1	0.4028	0.4723	2	0.3145	0.7535		1	Hapmap42919-BTA-35600	1	2	DOM	26/10	199/72	0.8436		1	Hapmap42919-BTA-35600	1	2	REC	3/33	57/214	0.07636
1	BovineHD0100021200	73321242	2	0.3611	0.4594	1	0.1305	0.6651		1	BovineHD0100021200	2	1	DOM	24/12	194/77	0.5601		1	BovineHD0100021200	2	1	REC	2/34	55/216	0.03788
1	ARS-BFGL-NGS-53144	73435277	2	0.2083	0.1716	1	0.4148	1.271		1	ARS-BFGL-NGS-53144	2	1	DOM	14/22	86/185	0.4495		1	ARS-BFGL-NGS-53144	2	1	REC	1/35	7/264	1
1	ARS-BFGL-NGS-23062	73463897	1	0.3611	0.4871	2	0.04543	0.5952		1	ARS-BFGL-NGS-23062	1	2	DOM	25/11	204/67	0.4239		1	ARS-BFGL-NGS-23062	1	2	REC	1/35	60/211	0.00339
1	BovineHD0100021254	73530556	1	0.1944	0.1747	2	0.7421	1.14		1	BovineHD0100021254	1	2	DOM	13/23	82/187	0.5657		1	BovineHD0100021254	1	2	REC	1/35	12/257	1
1	ARS-BFGL-NGS-32169	73586758	2	0.2361	0.2177	1	0.7621	1.111		1	ARS-BFGL-NGS-32169	2	1	DOM	15/21	102/169	0.7156		1	ARS-BFGL-NGS-32169	2	1	REC	2/34	16/255	1
1	BovineHD0100021274	73600387	2	0.4706	0.4758	1	1	0.9792		1	BovineHD0100021274	2	1	DOM	26/8	187/82	0.5503		1	BovineHD0100021274	2	1	REC	6/28	69/200	0.4005
1	ARS-BFGL-BAC-36572	73608012	1	0.2778	0.2841	2	1	0.969		1	ARS-BFGL-BAC-36572	1	2	DOM	19/17	127/144	0.5949		1	ARS-BFGL-BAC-36572	1	2	REC	1/35	27/244	0.223
1	BovineHD0100021284	73652242	1	0.4583	0.4963	2	0.6161	0.8588		1	BovineHD0100021284	1	2	DOM	25/11	197/73	0.6921		1	BovineHD0100021284	1	2	REC	8/28	71/199	0.6887
1	BTA-35628-no-rs	73671409	1	0.1806	0.1974	2	0.8744	0.8958		1	BTA-35628-no-rs	1	2	DOM	11/25	94/177	0.7105		1	BTA-35628-no-rs	1	2	REC	2/34	13/258	0.6913
1	UA-IFASA-4774	73714346	2	0.375	0.3081	1	0.2806	1.347		1	UA-IFASA-4774	2	1	DOM	22/14	136/135	0.2869		1	UA-IFASA-4774	2	1	REC	5/31	31/240	0.5904
1	ARS-BFGL-NGS-114627	73744599	1	0.3333	0.3579	2	0.7934	0.8969		1	ARS-BFGL-NGS-114627	1	2	DOM	20/16	161/110	0.7195		1	ARS-BFGL-NGS-114627	1	2	REC	4/32	33/238	1
1	BovineHD0100021316	73749733	1	0.5139	0.4576	2	0.3812	1.253		1	BovineHD0100021316	1	2	DOM	29/7	186/85	0.1764		1	BovineHD0100021316	1	2	REC	8/28	62/209	1
1	BovineHD0100021318	73754036	2	0.4167	0.3309	1	0.1851	1.445		1	BovineHD0100021318	2	1	DOM	23/13	146/123	0.2908		1	BovineHD0100021318	2	1	REC	7/29	32/237	0.1929
1	BovineHD0100021321	73767633	1	0.4861	0.4519	2	0.6156	1.148		1	BovineHD0100021321	1	2	DOM	26/10	184/86	0.7048		1	BovineHD0100021321	1	2	REC	9/27	60/210	0.6757
1	BTA-35631-no-rs	73789857	2	0.09722	0.1218	1	0.6986	0.7767		1	BTA-35631-no-rs	2	1	DOM	7/29	62/209	0.8319		1	BTA-35631-no-rs	2	1	REC	0/36	4/267	1
1	BovineHD0100021334	73816649	2	0.09722	0.1222	1	0.6987	0.7734		1	BovineHD0100021334	2	1	DOM	7/29	62/208	0.832		1	BovineHD0100021334	2	1	REC	0/36	4/266	1
1	BovineHD0100021364	73945134	2	0.3889	0.3155	1	0.2285	1.381		1	BovineHD0100021364	2	1	DOM	23/13	145/126	0.2864		1	BovineHD0100021364	2	1	REC	5/31	26/245	0.3849
1	Hapmap38109-BTA-36588	73971461	2	0.08333	0.1181	1	0.5525	0.679		1	Hapmap38109-BTA-36588	2	1	DOM	6/30	60/211	0.5243		1	Hapmap38109-BTA-36588	2	1	REC	0/36	4/267	1
1	BovineHD0100021422	74027229	2	0.02778	0.06458	1	0.2957	0.4139		1	BovineHD0100021422	2	1	DOM	2/34	33/238	0.3996		1	BovineHD0100021422	2	1	REC	0/36	2/269	1
1	BovineHD0100021430	74062960	1	0.125	0.25	2	0.01783	0.4286		1	BovineHD0100021430	1	2	DOM	7/29	115/155	0.01032		1	BovineHD0100021430	1	2	REC	2/34	20/250	1
1	BovineHD0100021450	74103245	1	0.08333	0.1439	2	0.2014	0.5408		1	BovineHD0100021450	1	2	DOM	6/30	70/201	0.3049		1	BovineHD0100021450	1	2	REC	0/36	8/263	0.6027
1	BTA-36593-no-rs	74141004	1	0.04167	0.03506	2	0.7347	1.197		1	BTA-36593-no-rs	1	2	DOM	3/33	18/253	0.723		1	BTA-36593-no-rs	1	2	REC	0/36	1/270	1
1	ARS-BFGL-NGS-81861	74559106	2	0.375	0.3111	1	0.2833	1.329		1	ARS-BFGL-NGS-81861	2	1	DOM	24/12	146/124	0.2109		1	ARS-BFGL-NGS-81861	2	1	REC	3/33	22/248	1
1	BovineHD0100021626	74644792	2	0.4722	0.4705	1	1	1.007		1	BovineHD0100021626	2	1	DOM	28/8	202/69	0.8383		1	BovineHD0100021626	2	1	REC	6/30	53/218	0.8234
1	Hapmap51396-BTA-114937	74646138	1	0.09722	0.1421	2	0.3638	0.6503		1	Hapmap51396-BTA-114937	1	2	DOM	7/29	73/198	0.4211		1	Hapmap51396-BTA-114937	1	2	REC	0/36	4/267	1
1	ARS-BFGL-NGS-37067	74688985	2	0.2778	0.3875	1	0.09144	0.6081		1	ARS-BFGL-NGS-37067	2	1	DOM	19/17	165/106	0.3697		1	ARS-BFGL-NGS-37067	2	1	REC	1/35	45/226	0.02508
1	Hapmap60658-rs29025870	74716669	2	0.04167	0.0203	1	0.2195	2.099		1	Hapmap60658-rs29025870	2	1	DOM	3/33	11/260	0.2179		1	Hapmap60658-rs29025870	2	1	REC	0/36	0/271	1
1	BovineHD0100021666	74729378	2	0.1111	0.1444	1	0.5877	0.7404		1	BovineHD0100021666	2	1	DOM	6/30	72/198	0.2272		1	BovineHD0100021666	2	1	REC	2/34	6/264	0.2398
1	Hapmap51567-BTA-17154	74751617	1	0.02778	0.02768	2	1	1.004		1	Hapmap51567-BTA-17154	1	2	DOM	2/34	15/256	1		1	Hapmap51567-BTA-17154	1	2	REC	0/36	0/271	1
1	BovineHD0100021709	74861369	2	0.1429	0.221	1	0.1614	0.5876		1	BovineHD0100021709	2	1	DOM	9/26	107/160	0.1384		1	BovineHD0100021709	2	1	REC	1/34	11/256	1
1	Hapmap25308-BTA-153014	74893925	1	0.2222	0.2989	2	0.2136	0.6702		1	Hapmap25308-BTA-153014	1	2	DOM	15/21	136/135	0.3779		1	Hapmap25308-BTA-153014	1	2	REC	1/35	26/245	0.2246
1	BovineHD0100021731	74943999	1	0.4167	0.3815	2	0.6068	1.158		1	BovineHD0100021731	1	2	DOM	20/16	177/93	0.268		1	BovineHD0100021731	1	2	REC	10/26	29/241	0.01312
1	ARS-BFGL-NGS-116528	74955005	1	0.05556	0.1338	2	0.05886	0.3807		1	ARS-BFGL-NGS-116528	1	2	DOM	4/32	67/202	0.09094		1	ARS-BFGL-NGS-116528	1	2	REC	0/36	5/264	1
1	ARS-BFGL-NGS-34525	74976635	2	0.3194	0.3266	1	1	0.9679		1	ARS-BFGL-NGS-34525	2	1	DOM	21/15	150/121	0.8586		1	ARS-BFGL-NGS-34525	2	1	REC	2/34	27/244	0.5511
1	BovineHD0100021752	75000671	1	0.5139	0.4594	2	0.4508	1.244		1	BovineHD0100021752	1	2	DOM	26/10	198/73	1		1	BovineHD0100021752	1	2	REC	11/25	51/220	0.1207
1	ARS-BFGL-NGS-15456	75006721	1	0.3194	0.3266	2	1	0.9679		1	ARS-BFGL-NGS-15456	1	2	DOM	21/15	150/121	0.8586		1	ARS-BFGL-NGS-15456	1	2	REC	2/34	27/244	0.5511
1	BovineHD0100021760	75020131	1	0.3056	0.3155	2	1	0.9546		1	BovineHD0100021760	1	2	DOM	21/15	146/125	0.7224		1	BovineHD0100021760	1	2	REC	1/35	25/246	0.3354
1	BovineHD0100021766	75040457	1	0.2206	0.1828	2	0.5085	1.265		1	BovineHD0100021766	1	2	DOM	15/19	87/181	0.1827		1	BovineHD0100021766	1	2	REC	0/34	11/257	0.6195
1	BovineHD0100021769	75049173	1	0.4861	0.4648	2	0.8017	1.089		1	BovineHD0100021769	1	2	DOM	27/9	197/73	1		1	BovineHD0100021769	1	2	REC	8/28	54/216	0.8252
1	BovineHD0100021799	75160480	2	0.25	0.3395	1	0.1431	0.6486		1	BovineHD0100021799	2	1	DOM	16/20	148/123	0.2879		1	BovineHD0100021799	2	1	REC	2/34	36/235	0.2803
1	Hapmap39961-BTA-100527	75184170	2	0.4861	0.441	1	0.5285	1.199		1	Hapmap39961-BTA-100527	2	1	DOM	29/7	186/85	0.1764		1	Hapmap39961-BTA-100527	2	1	REC	6/30	53/218	0.8234
1	BovineHD0100021814	75240418	1	0.4306	0.3524	2	0.1949	1.389		1	BovineHD0100021814	1	2	DOM	27/9	156/115	0.04825		1	BovineHD0100021814	1	2	REC	4/32	35/236	1
1	Hapmap59172-rs29012834	75269086	2	0.1944	0.179	1	0.7452	1.107		1	Hapmap59172-rs29012834	2	1	DOM	13/23	86/185	0.5758		1	Hapmap59172-rs29012834	2	1	REC	1/35	11/260	1
1	BovineHD0100021825	75294719	2	0.4167	0.5	1	0.21	0.7143		1	BovineHD0100021825	2	1	DOM	28/8	202/69	0.8383		1	BovineHD0100021825	2	1	REC	2/34	69/202	0.005672
1	ARS-BFGL-NGS-72713	75346472	1	0.2083	0.2546	2	0.4691	0.7704		1	ARS-BFGL-NGS-72713	1	2	DOM	15/21	121/150	0.8586		1	ARS-BFGL-NGS-72713	1	2	REC	0/36	17/254	0.2369
1	BovineHD0100021876	75479315	1	0.2143	0.2741	2	0.318	0.7224		1	BovineHD0100021876	1	2	DOM	15/20	130/140	0.5934		1	BovineHD0100021876	1	2	REC	0/35	18/252	0.2418
1	BovineHD0100021879	75486197	2	0.3194	0.3755	1	0.4353	0.7808		1	BovineHD0100021879	2	1	DOM	22/14	161/108	1		1	BovineHD0100021879	2	1	REC	1/35	41/228	0.03983
1	BovineHD0100021922	75570333	1	0.4861	0.4963	2	0.9007	0.96		1	BovineHD0100021922	1	2	DOM	25/11	205/66	0.418		1	BovineHD0100021922	1	2	REC	10/26	64/207	0.6782
1	BovineHD0100021932	75602779	2	0.02778	0.03321	1	1	0.8317		1	BovineHD0100021932	2	1	DOM	2/34	18/253	1		1	BovineHD0100021932	2	1	REC	0/36	0/271	1
1	ARS-BFGL-NGS-64672	75635752	2	0.3194	0.3819	1	0.3645	0.7596		1	ARS-BFGL-NGS-64672	2	1	DOM	18/18	172/99	0.144		1	ARS-BFGL-NGS-64672	2	1	REC	5/31	35/236	0.7959
1	Hapmap42898-BTA-28764	75682742	2	0.02778	0.01845	1	0.641	1.52		1	Hapmap42898-BTA-28764	2	1	DOM	2/34	10/261	0.6388		1	Hapmap42898-BTA-28764	2	1	REC	0/36	0/271	1
1	BTA-28763-no-rs	75716538	1	0.3194	0.2712	2	0.4018	1.261		1	BTA-28763-no-rs	1	2	DOM	20/16	127/144	0.3764		1	BTA-28763-no-rs	1	2	REC	3/33	20/251	0.741
1	BovineHD0100021976	75755758	2	0.3889	0.4389	1	0.4496	0.8136		1	BovineHD0100021976	2	1	DOM	24/12	181/89	1		1	BovineHD0100021976	2	1	REC	4/32	56/214	0.2619
1	ARS-BFGL-BAC-31487	75852855	1	0.1944	0.2694	2	0.1995	0.6547		1	ARS-BFGL-BAC-31487	1	2	DOM	13/23	122/149	0.373		1	ARS-BFGL-BAC-31487	1	2	REC	1/35	24/247	0.3324
1	BovineHD0100022054	75904016	1	0.5	0.4907	2	0.9007	1.038		1	BovineHD0100022054	1	2	DOM	29/7	197/73	0.4209		1	BovineHD0100022054	1	2	REC	7/29	68/202	0.54
1	BovineHD0100022062	75933471	2	0.2917	0.2463	1	0.3898	1.26		1	BovineHD0100022062	2	1	DOM	19/17	116/154	0.2874		1	BovineHD0100022062	2	1	REC	2/34	17/253	1
1	BovineHD0100022071	75978132	1	0.1389	0.1255	2	0.7084	1.124		1	BovineHD0100022071	1	2	DOM	10/26	66/205	0.6823		1	BovineHD0100022071	1	2	REC	0/36	2/269	1
1	BovineHD0100022072	75982657	1	0.3857	0.4	2	0.897	0.9419		1	BovineHD0100022072	1	2	DOM	24/11	174/96	0.7091		1	BovineHD0100022072	1	2	REC	3/32	42/228	0.4451
1	Hapmap44063-BTA-36599	76003958	1	0.1528	0.1162	2	0.3412	1.371		1	Hapmap44063-BTA-36599	1	2	DOM	11/25	62/209	0.3038		1	Hapmap44063-BTA-36599	1	2	REC	0/36	1/270	1
1	BovineHD0100022079	76022080	2	0.3857	0.3996	1	0.897	0.9433		1	BovineHD0100022079	2	1	DOM	24/11	173/96	0.7087		1	BovineHD0100022079	2	1	REC	3/32	42/227	0.4456
1	BTA-95639-no-rs	76090160	1	0.02778	0.02583	2	1	1.078		1	BTA-95639-no-rs	1	2	DOM	2/34	14/257	1		1	BTA-95639-no-rs	1	2	REC	0/36	0/271	1
1	BTA-95638-no-rs	76119473	2	0.02778	0.02583	1	1	1.078		1	BTA-95638-no-rs	2	1	DOM	2/34	14/257	1		1	BTA-95638-no-rs	2	1	REC	0/36	0/271	1
1	ARS-BFGL-BAC-31482	76172887	1	0.4583	0.4945	2	0.6165	0.8651		1	ARS-BFGL-BAC-31482	1	2	DOM	28/8	207/64	1		1	ARS-BFGL-BAC-31482	1	2	REC	5/31	61/210	0.2857
1	BovineHD0100022149	76207235	2	0.08333	0.1574	1	0.1128	0.4866		1	BovineHD0100022149	2	1	DOM	6/30	79/191	0.1641		1	BovineHD0100022149	2	1	REC	0/36	6/264	1
1	BTA-95655-no-rs	76217113	1	0.2778	0.2601	2	0.7759	1.094		1	BTA-95655-no-rs	1	2	DOM	19/17	121/150	0.378		1	BTA-95655-no-rs	1	2	REC	1/35	20/251	0.4872
1	BovineHD4100000445	76232991	1	0.3429	0.4059	2	0.3643	0.7636		1	BovineHD4100000445	1	2	DOM	19/16	182/89	0.1352		1	BovineHD4100000445	1	2	REC	5/30	38/233	1
1	BTA-18708-no-rs	76257377	2	0.1667	0.1292	1	0.3603	1.349		1	BTA-18708-no-rs	2	1	DOM	12/24	68/203	0.3139		1	BTA-18708-no-rs	2	1	REC	0/36	2/269	1
1	Hapmap50334-BTA-36619	76318682	2	0.01389	0.03875	1	0.498	0.3494		1	Hapmap50334-BTA-36619	2	1	DOM	1/35	21/250	0.49		1	Hapmap50334-BTA-36619	2	1	REC	0/36	0/271	1
1	BovineHD0100022176	76321233	1	0.3714	0.3277	2	0.5006	1.212		1	BovineHD0100022176	1	2	DOM	21/14	145/122	0.5901		1	BovineHD0100022176	1	2	REC	5/30	30/237	0.5765
1	BovineHD0100022177	76324446	1	0.5571	0.4551	2	0.1262	1.507		1	BovineHD0100022177	1	2	DOM	29/6	193/74	0.2242		1	BovineHD0100022177	1	2	REC	10/25	50/217	0.1792
1	ARS-BFGL-NGS-34347	76375060	2	0.1944	0.2528	1	0.311	0.7136		1	ARS-BFGL-NGS-34347	2	1	DOM	14/22	119/152	0.5965		1	ARS-BFGL-NGS-34347	2	1	REC	0/36	18/253	0.1448
1	BovineHD0100022236	76555608	2	0.1667	0.1697	1	1	0.9783		1	BovineHD0100022236	2	1	DOM	12/24	84/187	0.8486		1	BovineHD0100022236	2	1	REC	0/36	8/263	0.6027
1	BovineHD4100000446	76564040	1	0.04167	0.06458	2	0.6059	0.6298		1	BovineHD4100000446	1	2	DOM	3/33	35/236	0.5933		1	BovineHD4100000446	1	2	REC	0/36	0/271	1
1	Hapmap44231-BTA-36623	76587512	1	0.4306	0.4686	2	0.6153	0.8573		1	Hapmap44231-BTA-36623	1	2	DOM	25/11	200/71	0.554		1	Hapmap44231-BTA-36623	1	2	REC	6/30	54/217	0.8235
1	BovineHD0100022255	76616096	1	0.1029	0.1498	2	0.3628	0.6512		1	BovineHD0100022255	1	2	DOM	7/27	72/195	0.5365		1	BovineHD0100022255	1	2	REC	0/34	8/259	0.6038
1	BTA-36624-no-rs	76627997	1	0.2083	0.2546	2	0.4691	0.7704		1	BTA-36624-no-rs	1	2	DOM	15/21	120/151	0.8588		1	BTA-36624-no-rs	1	2	REC	0/36	18/253	0.1448
1	BovineHD0100022258	76630687	1	0.09722	0.1827	2	0.09524	0.4819		1	BovineHD0100022258	1	2	DOM	7/29	87/184	0.1767		1	BovineHD0100022258	1	2	REC	0/36	12/259	0.3724
1	Hapmap34720-BES7_Contig462_688	76662005	2	0.1389	0.1236	1	0.7054	1.143		1	Hapmap34720-BES7_Contig462_688	2	1	DOM	10/26	63/208	0.5367		1	Hapmap34720-BES7_Contig462_688	2	1	REC	0/36	4/267	1
1	ARS-BFGL-NGS-4661	76701704	1	0.1667	0.08856	2	0.05384	2.058		1	ARS-BFGL-NGS-4661	1	2	DOM	12/24	41/230	0.01627		1	ARS-BFGL-NGS-4661	1	2	REC	0/36	7/264	1
1	BovineHD0100022298	76781403	2	0.3857	0.3993	1	0.897	0.9448		1	BovineHD0100022298	2	1	DOM	24/11	178/90	0.8513		1	BovineHD0100022298	2	1	REC	3/32	36/232	0.5931
1	ARS-BFGL-NGS-92711	76822042	1	0.02778	0.05741	2	0.4102	0.4691		1	ARS-BFGL-NGS-92711	1	2	DOM	2/34	31/239	0.3961		1	ARS-BFGL-NGS-92711	1	2	REC	0/36	0/270	1
1	BovineHD0100022312	76841239	1	0.1143	0.1381	2	0.7113	0.8056		1	BovineHD0100022312	1	2	DOM	8/27	70/198	0.8376		1	BovineHD0100022312	1	2	REC	0/35	4/264	1
1	Hapmap42923-BTA-36604	76862840	1	0.1944	0.2768	2	0.1572	0.6308		1	Hapmap42923-BTA-36604	1	2	DOM	13/23	128/143	0.2191		1	Hapmap42923-BTA-36604	1	2	REC	1/35	22/249	0.4954
1	ARS-BFGL-BAC-34664	76937066	1	0.4028	0.4576	2	0.4497	0.7995		1	ARS-BFGL-BAC-34664	1	2	DOM	21/15	193/78	0.1248		1	ARS-BFGL-BAC-34664	1	2	REC	8/28	55/216	0.8264
1	ARS-BFGL-NGS-80187	76984280	2	0	0.01476	1	0.6055	0		1	ARS-BFGL-NGS-80187	2	1	DOM	0/36	8/263	0.6027		1	ARS-BFGL-NGS-80187	2	1	REC	0/36	0/271	1
1	BTA-36608-no-rs	77024680	1	0.4306	0.4262	2	1	1.018		1	BTA-36608-no-rs	1	2	DOM	25/11	184/87	1		1	BTA-36608-no-rs	1	2	REC	6/30	47/224	1
1	BovineHD0100022375	77039767	2	0.2083	0.21	1	1	0.9898		1	BovineHD0100022375	2	1	DOM	15/21	103/166	0.718		1	BovineHD0100022375	2	1	REC	0/36	10/259	0.6136
1	BovineHD0100022381	77073696	1	0.3571	0.3563	2	1	1.003		1	BovineHD0100022381	1	2	DOM	18/17	158/110	0.4671		1	BovineHD0100022381	1	2	REC	7/28	33/235	0.1944
1	BovineHD0100022391	77191739	2	0.3194	0.3081	1	0.8922	1.054		1	BovineHD0100022391	2	1	DOM	21/15	146/125	0.7224		1	BovineHD0100022391	2	1	REC	2/34	21/250	1
1	BovineHD0100022400	77211300	1	0.3194	0.3093	2	0.8924	1.048		1	BovineHD0100022400	1	2	DOM	21/15	146/124	0.7226		1	BovineHD0100022400	1	2	REC	2/34	21/249	1
1	Hapmap41244-BTA-36610	77266687	1	0.04167	0.07196	2	0.4592	0.5608		1	Hapmap41244-BTA-36610	1	2	DOM	3/33	37/234	0.5967		1	Hapmap41244-BTA-36610	1	2	REC	0/36	2/269	1
1	BovineHD0100022431	77305700	1	0.1944	0.3247	2	0.02929	0.502		1	BovineHD0100022431	1	2	DOM	12/24	146/125	0.02193		1	BovineHD0100022431	1	2	REC	2/34	30/241	0.3976
1	BovineHD0100022450	77354625	2	0.3088	0.3067	1	1	1.01		1	BovineHD0100022450	2	1	DOM	17/17	140/129	0.857		1	BovineHD0100022450	2	1	REC	4/30	25/244	0.5489
1	BovineHD0100022456	77372630	2	0.2286	0.3727	1	0.01725	0.4987		1	BovineHD0100022456	2	1	DOM	14/21	170/101	0.01603		1	BovineHD0100022456	2	1	REC	2/33	32/239	0.3961
1	BovineHD0100022459	77383623	1	0.2857	0.3048	2	0.7839	0.9122		1	BovineHD0100022459	1	2	DOM	18/17	133/136	0.859		1	BovineHD0100022459	1	2	REC	2/33	31/238	0.3966
1	Hapmap58919-rs29009958	77411154	2	0.5139	0.452	1	0.3785	1.282		1	Hapmap58919-rs29009958	2	1	DOM	27/9	183/88	0.4472		1	Hapmap58919-rs29009958	2	1	REC	10/26	62/209	0.532
1	BovineHD0100022472	77437362	1	0.4444	0.4889	2	0.531	0.8362		1	BovineHD0100022472	1	2	DOM	24/12	195/76	0.5571		1	BovineHD0100022472	1	2	REC	8/28	70/201	0.8386
1	ARS-BFGL-NGS-56146	77464630	1	0.3889	0.4336	2	0.527	0.8313		1	ARS-BFGL-NGS-56146	1	2	DOM	24/12	179/92	1		1	ARS-BFGL-NGS-56146	1	2	REC	4/32	56/215	0.2616
1	BovineHD0100022485	77478069	2	0.02857	0.0539	1	0.5632	0.5162		1	BovineHD0100022485	2	1	DOM	2/33	28/241	0.551		1	BovineHD0100022485	2	1	REC	0/35	1/268	1
1	BovineHD0100022505	77511314	2	0.2222	0.2934	1	0.266	0.6882		1	BovineHD0100022505	2	1	DOM	16/20	139/132	0.4812		1	BovineHD0100022505	2	1	REC	0/36	20/251	0.1454
1	BovineHD0100022553	77723763	1	0.3889	0.4244	2	0.6125	0.8632		1	BovineHD0100022553	1	2	DOM	24/12	176/95	1		1	BovineHD0100022553	1	2	REC	4/32	54/217	0.2604
1	BovineHD0100022574	77819373	2	0.1429	0.2593	1	0.03816	0.4762		1	BovineHD0100022574	2	1	DOM	8/27	119/151	0.01782		1	BovineHD0100022574	2	1	REC	2/33	21/249	1
1	Hapmap39375-BTA-112108	77861430	2	0.2639	0.214	1	0.3636	1.317		1	Hapmap39375-BTA-112108	2	1	DOM	16/20	106/165	0.5884		1	Hapmap39375-BTA-112108	2	1	REC	3/33	10/261	0.1857
1	BovineHD0100022618	77981891	1	0.4714	0.4907	2	0.8002	0.9255		1	BovineHD0100022618	1	2	DOM	25/10	194/76	1		1	BovineHD0100022618	1	2	REC	8/27	71/199	0.8378
1	BovineHD0100022630	78030606	1	0.2714	0.3232	2	0.415	0.7802		1	BovineHD0100022630	1	2	DOM	18/17	138/125	1		1	BovineHD0100022630	1	2	REC	1/34	32/231	0.1481
1	BovineHD0100022631	78033295	1	0.4583	0.4631	2	1	0.981		1	BovineHD0100022631	1	2	DOM	25/11	187/84	1		1	BovineHD0100022631	1	2	REC	8/28	64/207	1
1	BovineHD0100022654	78115174	2	0.09722	0.1537	1	0.2863	0.593		1	BovineHD0100022654	2	1	DOM	6/30	75/195	0.2264		1	BovineHD0100022654	2	1	REC	1/35	8/262	1
1	BovineHD0100022661	78135652	2	0.1429	0.2472	1	0.05274	0.5075		1	BovineHD0100022661	2	1	DOM	8/27	115/154	0.02772		1	BovineHD0100022661	2	1	REC	2/33	18/251	1
1	Hapmap26500-BTA-37512	78174116	2	0.05556	0.06827	1	1	0.8029		1	Hapmap26500-BTA-37512	2	1	DOM	4/32	36/235	1		1	Hapmap26500-BTA-37512	2	1	REC	0/36	1/270	1
1	ARS-BFGL-BAC-31500	78202852	1	0.3194	0.4244	2	0.09829	0.6367		1	ARS-BFGL-BAC-31500	1	2	DOM	19/17	173/98	0.2047		1	ARS-BFGL-BAC-31500	1	2	REC	4/32	57/214	0.1882
1	BTA-37493-no-rs	78237770	2	0.09722	0.06089	1	0.3039	1.661		1	BTA-37493-no-rs	2	1	DOM	6/30	30/241	0.4043		1	BTA-37493-no-rs	2	1	REC	1/35	3/268	0.3944
1	BovineHD0100022701	78279880	2	0.08571	0.158	1	0.1522	0.4996		1	BovineHD0100022701	2	1	DOM	6/29	78/191	0.163		1	BovineHD0100022701	2	1	REC	0/35	7/262	1
1	BovineHD0100022703	78290520	1	0.3143	0.4185	2	0.1202	0.6368		1	BovineHD0100022703	1	2	DOM	18/17	172/98	0.1944		1	BovineHD0100022703	1	2	REC	4/31	54/216	0.2615
1	BTB-00034886	78315800	2	0.1111	0.1771	1	0.1833	0.5807		1	BTB-00034886	2	1	DOM	8/28	89/182	0.253		1	BTB-00034886	2	1	REC	0/36	7/264	1
1	BovineHD0100022711	78328342	1	0.3143	0.4123	2	0.1217	0.6533		1	BovineHD0100022711	1	2	DOM	18/17	169/99	0.1988		1	BovineHD0100022711	1	2	REC	4/31	52/216	0.3547
1	ARS-BFGL-NGS-119431	78397732	1	0.5	0.4705	2	0.7066	1.125		1	ARS-BFGL-NGS-119431	1	2	DOM	27/9	192/79	0.6975		1	ARS-BFGL-NGS-119431	1	2	REC	9/27	63/208	0.835
1	BTB-00034743	78445777	2	0.4722	0.4465	1	0.7064	1.109		1	BTB-00034743	2	1	DOM	26/10	183/88	0.7042		1	BTB-00034743	2	1	REC	8/28	59/212	1
1	BovineHD0100022753	78498849	1	0.1286	0.1916	2	0.2506	0.6226		1	BovineHD0100022753	1	2	DOM	9/26	90/171	0.345		1	BovineHD0100022753	1	2	REC	0/35	10/251	0.6135
1	Hapmap40722-BTA-36642	78554220	2	0.1429	0.1292	1	0.7084	1.124		1	Hapmap40722-BTA-36642	2	1	DOM	8/27	64/207	1		1	Hapmap40722-BTA-36642	2	1	REC	2/33	6/265	0.2295
1	BTA-112299-no-rs	78580480	2	0.4429	0.4926	1	0.4487	0.8187		1	BTA-112299-no-rs	2	1	DOM	25/10	193/78	1		1	BTA-112299-no-rs	2	1	REC	6/29	74/197	0.2262
1	BovineHD0100022788	78620073	2	0.1857	0.2156	1	0.6424	0.8295		1	BovineHD0100022788	2	1	DOM	12/23	101/161	0.7126		1	BovineHD0100022788	2	1	REC	1/34	12/250	1
1	ARS-BFGL-NGS-111725	78685368	1	0.2714	0.2362	2	0.5522	1.205		1	ARS-BFGL-NGS-111725	1	2	DOM	15/20	116/155	1		1	ARS-BFGL-NGS-111725	1	2	REC	4/31	12/259	0.09594
1	ARS-BFGL-NGS-25522	78735491	1	0.2	0.2454	2	0.4594	0.7688		1	ARS-BFGL-NGS-25522	1	2	DOM	14/21	119/152	0.7195		1	ARS-BFGL-NGS-25522	1	2	REC	0/35	14/257	0.3823
1	BovineHD0100022839	78771750	1	0.07143	0.1203	2	0.317	0.5625		1	BovineHD0100022839	1	2	DOM	5/30	59/207	0.3805		1	BovineHD0100022839	1	2	REC	0/35	5/261	1
1	BTB-00034294	78909030	1	0.2857	0.262	2	0.6675	1.127		1	BTB-00034294	1	2	DOM	18/17	123/148	0.5896		1	BTB-00034294	1	2	REC	2/33	19/252	1
1	BovineHD0100022901	78991936	1	0.2571	0.2928	2	0.5774	0.8362		1	BovineHD0100022901	1	2	DOM	16/19	131/132	0.7204		1	BovineHD0100022901	1	2	REC	2/33	23/240	0.7506
1	Hapmap51218-BTA-36630	79040221	1	0.4286	0.4225	2	1	1.025		1	Hapmap51218-BTA-36630	1	2	DOM	23/12	184/87	0.8483		1	Hapmap51218-BTA-36630	1	2	REC	7/28	45/226	0.6332
1	BovineHD0100022920	79076444	1	0.3714	0.4275	2	0.4403	0.7913		1	BovineHD0100022920	1	2	DOM	19/16	184/85	0.1258		1	BovineHD0100022920	1	2	REC	7/28	46/223	0.6399
1	BTB-00034202	79082187	2	0.1571	0.1444	1	0.7219	1.104		1	BTB-00034202	2	1	DOM	11/24	74/196	0.6889		1	BTB-00034202	2	1	REC	0/35	4/266	1
1	Hapmap49586-BTA-36632	79111744	1	0.2361	0.3376	2	0.1076	0.6064		1	Hapmap49586-BTA-36632	1	2	DOM	15/21	157/114	0.07482		1	Hapmap49586-BTA-36632	1	2	REC	2/34	26/245	0.5526
1	ARS-BFGL-NGS-106728	79166288	1	0.3286	0.3093	2	0.7841	1.093		1	ARS-BFGL-NGS-106728	1	2	DOM	19/16	144/126	1		1	ARS-BFGL-NGS-106728	1	2	REC	4/31	23/247	0.5303
1	ARS-BFGL-NGS-24966	79190806	2	0.1571	0.1642	1	1	0.949		1	ARS-BFGL-NGS-24966	2	1	DOM	11/24	83/188	1		1	ARS-BFGL-NGS-24966	2	1	REC	0/35	6/265	1
1	BovineHD0100022969	79235157	2	0.4857	0.3954	1	0.1559	1.444		1	BovineHD0100022969	2	1	DOM	26/9	165/98	0.1956		1	BovineHD0100022969	2	1	REC	8/27	43/220	0.3421
1	BovineHD0100022979	79266686	2	0.3857	0.464	1	0.2507	0.7253		1	BovineHD0100022979	2	1	DOM	23/12	185/79	0.696		1	BovineHD0100022979	2	1	REC	4/31	60/204	0.1862
1	ARS-BFGL-NGS-113198	79291931	2	0.1286	0.1292	1	1	0.9948		1	ARS-BFGL-NGS-113198	2	1	DOM	9/26	64/207	0.8334		1	ARS-BFGL-NGS-113198	2	1	REC	0/35	6/265	1
1	Hapmap51438-BTA-37566	79315052	2	0.4143	0.5037	1	0.1648	0.697		1	Hapmap51438-BTA-37566	2	1	DOM	24/11	202/69	0.5396		1	Hapmap51438-BTA-37566	2	1	REC	5/30	71/200	0.1483
1	BovineHD0100023005	79357690	1	0.3429	0.4447	2	0.1234	0.6516		1	BovineHD0100023005	1	2	DOM	18/17	182/80	0.03657		1	BovineHD0100023005	1	2	REC	6/29	51/211	1
1	BTB-00036018	79428743	1	0.3857	0.3506	2	0.5962	1.163		1	BTB-00036018	1	2	DOM	21/14	160/111	1		1	BTB-00036018	1	2	REC	6/29	30/241	0.2735
1	ARS-BFGL-NGS-100951	79472403	2	0.5139	0.4686	1	0.5304	1.199		1	ARS-BFGL-NGS-100951	2	1	DOM	26/10	202/69	0.8393		1	ARS-BFGL-NGS-100951	2	1	REC	11/25	52/219	0.1254
1	BovineHD0100023038	79495073	1	0.2286	0.1992	2	0.5311	1.191		1	BovineHD0100023038	1	2	DOM	15/20	94/167	0.4585		1	BovineHD0100023038	1	2	REC	1/34	10/251	1
1	BovineHD0100023042	79510270	2	0.08571	0.1	1	0.8328	0.8438		1	BovineHD0100023042	2	1	DOM	6/29	47/213	1		1	BovineHD0100023042	2	1	REC	0/35	5/255	1
1	BTA-37567-no-rs	79513248	2	0.3857	0.3432	1	0.5062	1.202		1	BTA-37567-no-rs	2	1	DOM	20/15	153/118	1		1	BTA-37567-no-rs	2	1	REC	7/28	33/238	0.1901
1	Hapmap41250-BTA-38429	79548115	2	0.2	0.2741	1	0.1992	0.6622		1	Hapmap41250-BTA-38429	2	1	DOM	12/23	129/141	0.1515		1	Hapmap41250-BTA-38429	2	1	REC	2/33	19/251	1
1	BovineHD0100023059	79572795	1	0.3571	0.417	2	0.3675	0.7768		1	BovineHD0100023059	1	2	DOM	18/17	176/89	0.09195		1	BovineHD0100023059	1	2	REC	7/28	45/220	0.6379
1	BovineHD0100023067	79605572	1	0.625	0.459	2	0.008458	1.965		1	BovineHD0100023067	1	2	DOM	29/7	196/72	0.4209		1	BovineHD0100023067	1	2	REC	16/20	50/218	0.001023
1	BovineHD0100023079	79639732	2	0.5143	0.4316	1	0.2019	1.395		1	BovineHD0100023079	2	1	DOM	27/8	183/80	0.433		1	BovineHD0100023079	2	1	REC	9/26	44/219	0.2368
1	BovineHD0100023116	79756204	2	0.3429	0.3657	1	0.792	0.9051		1	BovineHD0100023116	2	1	DOM	21/14	166/102	0.8545		1	BovineHD0100023116	2	1	REC	3/32	30/238	0.7801
1	BTB-00036138	79757250	2	0.1857	0.19	1	1	0.9721		1	BTB-00036138	2	1	DOM	13/22	95/176	0.8517		1	BTB-00036138	2	1	REC	0/35	8/263	0.6034
1	Hapmap50131-BTA-85559	79835571	2	0.1389	0.1716	1	0.6146	0.7787		1	Hapmap50131-BTA-85559	2	1	DOM	10/26	84/187	0.8477		1	Hapmap50131-BTA-85559	2	1	REC	0/36	9/262	0.6054
1	BovineHD0100023133	79858270	1	0.1857	0.25	2	0.2987	0.6842		1	BovineHD0100023133	1	2	DOM	13/22	115/149	0.5861		1	BovineHD0100023133	1	2	REC	0/35	17/247	0.2364
1	BovineHD0100023142	79916138	1	0.4143	0.479	2	0.3724	0.7693		1	BovineHD0100023142	1	2	DOM	24/11	193/69	0.5451		1	BovineHD0100023142	1	2	REC	5/30	58/204	0.38
1	BovineHD0100023146	79938242	2	0.4286	0.3712	1	0.361	1.27		1	BovineHD0100023146	2	1	DOM	24/11	159/105	0.3637		1	BovineHD0100023146	2	1	REC	6/29	37/227	0.6102
1	ARS-BFGL-NGS-19741	79957893	1	0.25	0.3303	2	0.1818	0.676		1	ARS-BFGL-NGS-19741	1	2	DOM	16/20	154/117	0.2113		1	ARS-BFGL-NGS-19741	1	2	REC	2/34	25/246	0.7532
1	BovineHD0100023165	79990596	2	0.2286	0.322	1	0.1309	0.624		1	BovineHD0100023165	2	1	DOM	14/21	146/118	0.1052		1	BovineHD0100023165	2	1	REC	2/33	24/240	0.7511
1	ARS-BFGL-NGS-1514	80021446	1	0.3	0.2399	2	0.3023	1.358		1	ARS-BFGL-NGS-1514	1	2	DOM	18/17	115/156	0.3661		1	ARS-BFGL-NGS-1514	1	2	REC	3/32	15/256	0.4444
1	BovineHD0100023182	80037828	2	0.4714	0.4639	1	1	1.031		1	BovineHD0100023182	2	1	DOM	26/9	191/72	1		1	BovineHD0100023182	2	1	REC	7/28	53/210	1
1	BovineHD0100023186	80051299	1	0.4583	0.3926	2	0.3068	1.309		1	BovineHD0100023186	1	2	DOM	26/10	175/95	0.4568		1	BovineHD0100023186	1	2	REC	7/29	37/233	0.3231
1	BovineHD0100023190	80065210	1	0.3472	0.3234	2	0.6896	1.113		1	BovineHD0100023190	1	2	DOM	22/14	149/120	0.5934		1	BovineHD0100023190	1	2	REC	3/33	25/244	1
1	ARS-BFGL-NGS-79990	80070890	2	0.2857	0.2491	1	0.5591	1.206		1	ARS-BFGL-NGS-79990	2	1	DOM	17/18	117/154	0.5895		1	ARS-BFGL-NGS-79990	2	1	REC	3/32	18/253	0.7192
1	BovineHD0100023210	80108636	2	0.2714	0.3657	1	0.144	0.6463		1	BovineHD0100023210	2	1	DOM	17/18	159/109	0.2748		1	BovineHD0100023210	2	1	REC	2/33	37/231	0.2807
1	BovineHD0100023217	80140528	1	0.3429	0.2752	2	0.2587	1.374		1	BovineHD0100023217	1	2	DOM	20/15	127/131	0.4717		1	BovineHD0100023217	1	2	REC	4/31	15/243	0.2606
1	BovineHD0100023223	80185391	1	0.3	0.2434	2	0.3065	1.332		1	BovineHD0100023223	1	2	DOM	18/17	114/153	0.3672		1	BovineHD0100023223	1	2	REC	3/32	16/251	0.4708
1	BovineHD0100023235	80224613	2	0.3429	0.2708	1	0.2053	1.405		1	BovineHD0100023235	2	1	DOM	20/15	128/136	0.3718		1	BovineHD0100023235	2	1	REC	4/31	15/249	0.2559
1	BTA-38441-no-rs	80284430	1	0.4444	0.4188	2	0.7043	1.11		1	BTA-38441-no-rs	1	2	DOM	25/11	183/88	1		1	BTA-38441-no-rs	1	2	REC	7/29	44/227	0.6348
1	BTB-00035080	80454120	2	0.02857	0.02974	1	1	0.9596		1	BTB-00035080	2	1	DOM	2/33	16/253	1		1	BTB-00035080	2	1	REC	0/35	0/269	1
1	BTA-37523-no-rs	80481874	2	0.04286	0.1111	1	0.09365	0.3582		1	BTA-37523-no-rs	2	1	DOM	3/32	58/212	0.07618		1	BTA-37523-no-rs	2	1	REC	0/35	2/268	1
1	BovineHD0100023292	80499686	1	0.1143	0.1119	2	1	1.024		1	BovineHD0100023292	1	2	DOM	8/27	56/212	0.8261		1	BovineHD0100023292	1	2	REC	0/35	4/264	1
1	Hapmap47934-BTA-38431	80570275	1	0.08571	0.1033	2	0.8334	0.8136		1	Hapmap47934-BTA-38431	1	2	DOM	6/29	52/219	1		1	Hapmap47934-BTA-38431	1	2	REC	0/35	4/267	1
1	ARS-BFGL-NGS-96340	80618771	2	0.5	0.4945	1	1	1.022		1	ARS-BFGL-NGS-96340	2	1	DOM	28/7	203/68	0.6765		1	ARS-BFGL-NGS-96340	2	1	REC	7/28	65/206	0.6775
[truncated: 71,608 more rows]
