# Supplementary material for: Genome-wide association analyses in dairy heifers highlight genes overlapping with mouse and human fertility and human health traits
Source: Research Square preprint supplement (doi:10.21203/rs.3.rs-6463477/v1), 2025-05-05
Supplement: Supplementary file 11 [file d7c900b17a17e505ab099d31.xlsx]

## Sheet: fertility_results_fisher
Additional file 2. Results of analysis of infertility.
Fisher allelic test										Fisher dominance test of the reference alleale									Fisher recessive test of the reference alleale
CHR	SNP	BP	A1	F_A	F_U	A2	P	OR		CHR	SNP	A1	A2	TEST	AFF	UNAFF	P		CHR	SNP	A1	A2	TEST	AFF	UNAFF	P
1	BovineHD0100000005	655346	1	0.5	0.4241	2	0.5149	1.358		1	BovineHD0100000005	1	2	DOM	7/4	184/86	0.749		1	BovineHD0100000005	1	2	REC	4/7	45/225	0.105
1	BovineHD0100000026	719789	2	0.5	0.4852	1	1	1.061		1	BovineHD0100000026	2	1	DOM	7/3	205/66	0.7113		1	BovineHD0100000026	2	1	REC	3/7	58/213	0.4566
1	BovineHD0100000035	761316	2	0.4545	0.3672	1	0.5	1.436		1	BovineHD0100000035	2	1	DOM	7/4	161/110	1		1	BovineHD0100000035	2	1	REC	3/8	38/233	0.2043
1	Hapmap43437-BTA-101873	776231	1	0.4545	0.4225	2	0.8274	1.139		1	Hapmap43437-BTA-101873	1	2	DOM	7/4	185/86	0.7483		1	Hapmap43437-BTA-101873	1	2	REC	3/8	44/227	0.4006
1	BovineHD0100000051	805126	1	0.5455	0.4667	2	0.518	1.371		1	BovineHD0100000051	1	2	DOM	9/2	198/72	0.7333		1	BovineHD0100000051	1	2	REC	3/8	54/216	0.4707
1	BovineHD0100000057	824172	1	0.3636	0.3241	2	0.8168	1.192		1	BovineHD0100000057	1	2	DOM	6/5	146/124	1		1	BovineHD0100000057	1	2	REC	2/9	29/241	0.3473
1	BovineHD0100000066	842891	2	0.3889	0.4086	1	1	0.9211		1	BovineHD0100000066	2	1	DOM	5/4	171/97	0.728		1	BovineHD0100000066	2	1	REC	2/7	48/220	0.6674
1	BovineHD0100000064	849544	1	0.4	0.3685	2	0.8155	1.142		1	BovineHD0100000064	1	2	DOM	6/4	161/109	1		1	BovineHD0100000064	1	2	REC	2/8	38/232	0.6394
1	BovineHD0100000067	858145	2	0.3	0.2768	1	0.8023	1.12		1	BovineHD0100000067	2	1	DOM	5/5	130/141	1		1	BovineHD0100000067	2	1	REC	1/9	20/251	0.5461
1	ARS-BFGL-NGS-16466	907810	2	0.09091	0.09225	1	1	0.984		1	ARS-BFGL-NGS-16466	2	1	DOM	2/9	49/222	1		1	ARS-BFGL-NGS-16466	2	1	REC	0/11	1/270	1
1	BovineHD0100000077	914796	1	0.1111	0.1157	2	1	0.9556		1	BovineHD0100000077	1	2	DOM	2/7	60/208	1		1	BovineHD0100000077	1	2	REC	0/9	2/266	1
1	BovineHD0100000079	918822	1	0.1	0.1222	2	1	0.798		1	BovineHD0100000079	1	2	DOM	2/8	64/206	1		1	BovineHD0100000079	1	2	REC	0/10	2/268	1
1	BovineHD0100000081	928563	2	0.1111	0.1157	1	1	0.9556		1	BovineHD0100000081	2	1	DOM	2/7	60/208	1		1	BovineHD0100000081	2	1	REC	0/9	2/266	1
1	BovineHD0100000082	930560	1	0.4091	0.4093	2	1	0.9993		1	BovineHD0100000082	1	2	DOM	8/3	168/102	0.5456		1	BovineHD0100000082	1	2	REC	1/10	53/217	0.6967
1	BovineHD0100000106	1001634	2	0.1	0.137	1	1	0.6997		1	BovineHD0100000106	2	1	DOM	2/8	66/204	1		1	BovineHD0100000106	2	1	REC	0/10	8/262	1
1	BovineHD0100000110	1016283	2	0.15	0.187	1	1	0.767		1	BovineHD0100000110	2	1	DOM	3/7	90/180	1		1	BovineHD0100000110	2	1	REC	0/10	11/259	1
1	Hapmap34944-BES1_Contig627_1906	1032564	2	0.3636	0.3137	1	0.6429	1.25		1	Hapmap34944-BES1_Contig627_1906	2	1	DOM	6/5	142/129	1		1	Hapmap34944-BES1_Contig627_1906	2	1	REC	2/9	28/243	0.3303
1	BovineHD0100000136	1052361	2	0.3	0.4389	1	0.2565	0.5479		1	BovineHD0100000136	2	1	DOM	6/4	186/84	0.5117		1	BovineHD0100000136	2	1	REC	0/10	51/219	0.2169
1	BovineHD0100000137	1055397	1	0.05556	0.0653	2	1	0.842		1	BovineHD0100000137	1	2	DOM	1/8	34/234	1		1	BovineHD0100000137	1	2	REC	0/9	1/267	1
1	BovineHD0100000151	1091658	1	0.1	0.2333	2	0.2748	0.3651		1	BovineHD0100000151	1	2	DOM	2/8	117/153	0.1979		1	BovineHD0100000151	1	2	REC	0/10	9/261	1
1	BovineHD0100000155	1098033	2	0.45	0.45	1	1	1		1	BovineHD0100000155	2	1	DOM	7/3	193/77	1		1	BovineHD0100000155	2	1	REC	2/8	50/220	1
1	BovineHD0100000161	1104577	2	0.1	0.2333	1	0.2748	0.3651		1	BovineHD0100000161	2	1	DOM	2/8	117/153	0.1979		1	BovineHD0100000161	2	1	REC	0/10	9/261	1
1	ARS-BFGL-NGS-98142	1110393	2	0.4091	0.3801	1	0.8246	1.129		1	ARS-BFGL-NGS-98142	2	1	DOM	7/4	166/105	1		1	ARS-BFGL-NGS-98142	2	1	REC	2/9	40/231	0.6709
1	BovineHD0100000166	1112539	2	0.1	0.2333	1	0.2748	0.3651		1	BovineHD0100000166	2	1	DOM	2/8	117/153	0.1979		1	BovineHD0100000166	2	1	REC	0/10	9/261	1
1	BovineHD0100000170	1126372	1	0.2727	0.4037	2	0.27	0.5539		1	BovineHD0100000170	1	2	DOM	6/5	179/91	0.5188		1	BovineHD0100000170	1	2	REC	0/11	39/231	0.3718
1	Hapmap53946-rs29015852	1150763	2	0.1818	0.1734	1	1	1.059		1	Hapmap53946-rs29015852	2	1	DOM	4/7	85/186	0.7462		1	Hapmap53946-rs29015852	2	1	REC	0/11	9/262	1
1	BovineHD0100000183	1188534	2	0.2273	0.213	1	0.7954	1.087		1	BovineHD0100000183	2	1	DOM	5/6	101/169	0.7524		1	BovineHD0100000183	2	1	REC	0/11	14/256	1
1	BovineHD0100000200	1235550	2	0.5	0.474	1	0.8243	1.11		1	BovineHD0100000200	2	1	DOM	7/3	193/76	1		1	BovineHD0100000200	2	1	REC	3/7	62/207	0.7029
1	BovineHD0100000221	1375784	2	0.1818	0.1667	1	0.7744	1.111		1	BovineHD0100000221	2	1	DOM	4/7	82/188	0.7411		1	BovineHD0100000221	2	1	REC	0/11	8/262	1
1	BovineHD0100000231	1406817	2	0.1818	0.1722	1	0.7809	1.068		1	BovineHD0100000231	2	1	DOM	4/7	84/186	0.7448		1	BovineHD0100000231	2	1	REC	0/11	9/261	1
1	BovineHD0100000234	1416198	2	0.4	0.3489	1	0.6393	1.244		1	BovineHD0100000234	2	1	DOM	6/4	157/111	1		1	BovineHD0100000234	2	1	REC	2/8	30/238	0.3229
1	BovineHD0100000242	1459085	1	0.3182	0.4033	2	0.5093	0.6903		1	BovineHD0100000242	1	2	DOM	6/5	178/91	0.5195		1	BovineHD0100000242	1	2	REC	1/10	39/230	1
1	BovineHD0100000244	1469010	2	0	0.1365	1	0.09782	0		1	BovineHD0100000244	2	1	DOM	0/11	72/199	0.07132		1	BovineHD0100000244	2	1	REC	0/11	2/269	1
1	BovineHD0100000252	1523007	1	0.5	0.4742	2	0.8244	1.109		1	BovineHD0100000252	1	2	DOM	7/3	190/81	1		1	BovineHD0100000252	1	2	REC	3/7	67/204	0.714
1	BovineHD0100000257	1540641	2	0.15	0.3093	1	0.1455	0.3942		1	BovineHD0100000257	2	1	DOM	3/7	140/130	0.2097		1	BovineHD0100000257	2	1	REC	0/10	27/243	0.6056
1	BovineHD0100000261	1556392	1	0.5	0.3759	2	0.2666	1.66		1	BovineHD0100000261	1	2	DOM	8/3	166/104	0.5412		1	BovineHD0100000261	1	2	REC	3/8	37/233	0.1952
1	BovineHD0100000280	1587057	1	0.4	0.4241	2	1	0.9054		1	BovineHD0100000280	1	2	DOM	6/4	180/90	0.7366		1	BovineHD0100000280	1	2	REC	2/8	49/221	1
1	ARS-BFGL-NGS-65067	1604940	1	0.2273	0.3579	2	0.2591	0.5276		1	ARS-BFGL-NGS-65067	1	2	DOM	5/6	160/111	0.5343		1	ARS-BFGL-NGS-65067	1	2	REC	0/11	34/237	0.3711
1	BovineHD0100000293	1621844	1	0.4545	0.4111	2	0.8257	1.194		1	BovineHD0100000293	1	2	DOM	7/4	175/95	1		1	BovineHD0100000293	1	2	REC	3/8	47/223	0.4193
1	BovineHD0100000296	1625016	2	0.3889	0.4176	1	1	0.8875		1	BovineHD0100000296	2	1	DOM	5/4	182/85	0.4759		1	BovineHD0100000296	2	1	REC	2/7	41/226	0.6345
1	BovineHD0100000297	1627573	1	0.3182	0.2407	2	0.4474	1.472		1	BovineHD0100000297	1	2	DOM	7/4	113/157	0.2142		1	BovineHD0100000297	1	2	REC	0/11	17/253	1
1	ARS-BFGL-BAC-34682	1671886	2	0	0.0572	1	0.6252	0		1	ARS-BFGL-BAC-34682	2	1	DOM	0/11	31/240	0.6166		1	ARS-BFGL-BAC-34682	2	1	REC	0/11	0/271	1
1	BovineHD0100000319	1685880	2	0.3	0.3815	1	0.6396	0.6949		1	BovineHD0100000319	2	1	DOM	6/4	165/105	1		1	BovineHD0100000319	2	1	REC	0/10	41/229	0.367
1	ARS-BFGL-NGS-98203	1730547	1	0.4545	0.4686	2	1	0.9449		1	ARS-BFGL-NGS-98203	1	2	DOM	7/4	191/80	0.7377		1	ARS-BFGL-NGS-98203	1	2	REC	3/8	63/208	0.7229
1	BovineHD0100000344	1761967	2	0.45	0.4685	1	1	0.9281		1	BovineHD0100000344	2	1	DOM	7/3	187/83	1		1	BovineHD0100000344	2	1	REC	2/8	66/204	1
1	BovineHD0100000350	1784777	2	0.35	0.4114	1	0.6496	0.7703		1	BovineHD0100000350	2	1	DOM	6/4	169/102	1		1	BovineHD0100000350	2	1	REC	1/9	54/217	0.6926
1	BovineHD0100000354	1802755	2	0.5	0.4778	1	1	1.093		1	BovineHD0100000354	2	1	DOM	7/3	192/78	1		1	BovineHD0100000354	2	1	REC	3/7	66/204	0.7119
1	BovineHD0100000360	1821203	1	0.2	0.1866	2	0.7766	1.09		1	BovineHD0100000360	1	2	DOM	4/6	90/178	0.7377		1	BovineHD0100000360	1	2	REC	0/10	10/258	1
1	ARS-BFGL-BAC-2376	1834781	2	0.4545	0.4502	1	1	1.018		1	ARS-BFGL-BAC-2376	2	1	DOM	7/4	190/81	0.7391		1	ARS-BFGL-BAC-2376	2	1	REC	3/8	54/217	0.4691
1	BovineHD0100000370	1852426	2	0.1	0.1231	1	1	0.7912		1	BovineHD0100000370	2	1	DOM	2/8	64/204	1		1	BovineHD0100000370	2	1	REC	0/10	2/266	1
1	BovineHD0100000373	1863496	2	0.15	0.1402	1	0.7522	1.082		1	BovineHD0100000373	2	1	DOM	3/7	70/201	0.723		1	BovineHD0100000373	2	1	REC	0/10	6/265	1
1	BovineHD0100000382	1917241	1	0.25	0.3241	2	0.6283	0.6952		1	BovineHD0100000382	1	2	DOM	5/5	144/126	1		1	BovineHD0100000382	1	2	REC	0/10	31/239	0.6086
1	BovineHD0100000391	1968406	1	0.55	0.3963	2	0.2447	1.862		1	BovineHD0100000391	1	2	DOM	8/2	176/94	0.5024		1	BovineHD0100000391	1	2	REC	3/7	38/232	0.1674
1	ARS-BFGL-BAC-7196	1984725	2	0.09091	0.04428	1	0.2692	2.158		1	ARS-BFGL-BAC-7196	2	1	DOM	2/9	24/247	0.2688		1	ARS-BFGL-BAC-7196	2	1	REC	0/11	0/271	1
1	ARS-BFGL-BAC-12931	2008865	1	0.1818	0.1125	2	0.3048	1.752		1	ARS-BFGL-BAC-12931	1	2	DOM	4/7	55/216	0.25		1	ARS-BFGL-BAC-12931	1	2	REC	0/11	6/265	1
1	BovineHD0100000402	2010236	1	0.45	0.2889	2	0.1361	2.014		1	BovineHD0100000402	1	2	DOM	7/3	138/132	0.338		1	BovineHD0100000402	1	2	REC	2/8	18/252	0.1544
1	BovineHD0100000406	2024917	1	0.5455	0.3519	2	0.07212	2.211		1	BovineHD0100000406	1	2	DOM	9/2	157/113	0.209		1	BovineHD0100000406	1	2	REC	3/8	33/237	0.1545
1	ARS-BFGL-BAC-14857	2058539	2	0.4091	0.2841	1	0.2314	1.744		1	ARS-BFGL-BAC-14857	2	1	DOM	7/4	138/133	0.5425		1	ARS-BFGL-BAC-14857	2	1	REC	2/9	16/255	0.1503
1	Hapmap53766-ss46526150	2082139	2	0.5455	0.428	1	0.2826	1.603		1	Hapmap53766-ss46526150	2	1	DOM	9/2	181/90	0.5127		1	Hapmap53766-ss46526150	2	1	REC	3/8	51/220	0.4458
1	BovineHD0100000426	2086121	2	0.15	0.1852	1	1	0.7765		1	BovineHD0100000426	2	1	DOM	3/7	89/181	1		1	BovineHD0100000426	2	1	REC	0/10	11/259	1
1	ARS-BFGL-NGS-115971	2107796	2	0.5	0.441	1	0.6637	1.268		1	ARS-BFGL-NGS-115971	2	1	DOM	7/4	182/89	0.7555		1	ARS-BFGL-NGS-115971	2	1	REC	4/7	57/214	0.2601
1	BovineHD0100000434	2119684	1	0.15	0.1759	2	1	0.8266		1	BovineHD0100000434	1	2	DOM	3/7	87/183	1		1	BovineHD0100000434	1	2	REC	0/10	8/262	1
1	BovineHD0100000436	2128341	2	0.15	0.06134	1	0.1318	2.701		1	BovineHD0100000436	2	1	DOM	3/7	31/238	0.1091		1	BovineHD0100000436	2	1	REC	0/10	2/267	1
1	ARS-BFGL-NGS-62826	2158691	2	0.1818	0.06089	1	0.04885	3.428		1	ARS-BFGL-NGS-62826	2	1	DOM	4/7	31/240	0.03493		1	ARS-BFGL-NGS-62826	2	1	REC	0/11	2/269	1
1	BovineHD0100000445	2172213	1	0.1	0.2037	2	0.3932	0.4343		1	BovineHD0100000445	1	2	DOM	2/8	100/170	0.3359		1	BovineHD0100000445	1	2	REC	0/10	10/260	1
1	BovineHD0100000449	2192489	2	0.45	0.476	1	1	0.9006		1	BovineHD0100000449	2	1	DOM	6/4	191/80	0.4922		1	BovineHD0100000449	2	1	REC	3/7	67/204	0.714
1	BovineHD0100000455	2214296	2	0.25	0.3537	1	0.4749	0.6091		1	BovineHD0100000455	2	1	DOM	4/6	158/112	0.3308		1	BovineHD0100000455	2	1	REC	1/9	33/237	1
1	BovineHD0100000459	2229077	2	0.45	0.3741	1	0.4904	1.369		1	BovineHD0100000459	2	1	DOM	6/4	170/100	1		1	BovineHD0100000459	2	1	REC	3/7	32/238	0.1159
1	BTA-39394-no-rs	2235492	1	0.1364	0.1771	2	0.7804	0.7336		1	BTA-39394-no-rs	1	2	DOM	3/8	88/183	1		1	BTA-39394-no-rs	1	2	REC	0/11	8/263	1
1	BovineHD0100000488	2279667	1	0.5	0.363	2	0.2587	1.755		1	BovineHD0100000488	1	2	DOM	8/3	160/110	0.5341		1	BovineHD0100000488	1	2	REC	3/8	36/234	0.1847
1	BovineHD0100000504	2299194	1	0.2273	0.2907	2	0.6357	0.7175		1	BovineHD0100000504	1	2	DOM	5/6	134/136	1		1	BovineHD0100000504	1	2	REC	0/11	23/247	0.6083
1	ARS-BFGL-NGS-105306	2305128	1	0.2727	0.2934	2	1	0.9033		1	ARS-BFGL-NGS-105306	1	2	DOM	6/5	135/136	1		1	ARS-BFGL-NGS-105306	1	2	REC	0/11	24/247	0.6072
1	BovineHD0100000526	2374280	1	0.25	0.1426	2	0.1941	2.004		1	BovineHD0100000526	1	2	DOM	5/5	71/199	0.1413		1	BovineHD0100000526	1	2	REC	0/10	6/264	1
1	BovineHD0100000531	2379674	2	0.25	0.1759	1	0.377	1.561		1	BovineHD0100000531	2	1	DOM	5/5	86/184	0.3023		1	BovineHD0100000531	2	1	REC	0/10	9/261	1
1	ARS-BFGL-NGS-39992	2391777	1	0.2273	0.1827	2	0.5774	1.316		1	ARS-BFGL-NGS-39992	1	2	DOM	5/6	90/181	0.5164		1	ARS-BFGL-NGS-39992	1	2	REC	0/11	9/262	1
1	ARS-BFGL-BAC-13059	2482685	1	0.04545	0.04797	2	1	0.9451		1	ARS-BFGL-BAC-13059	1	2	DOM	1/10	25/246	1		1	ARS-BFGL-BAC-13059	1	2	REC	0/11	1/270	1
1	ARS-BFGL-NGS-11433	2574098	1	0.3636	0.214	2	0.114	2.099		1	ARS-BFGL-NGS-11433	1	2	DOM	6/5	105/166	0.3512		1	ARS-BFGL-NGS-11433	1	2	REC	2/9	11/260	0.08534
1	ARS-BFGL-NGS-25183	2617150	1	0.4545	0.2583	2	0.04985	2.393		1	ARS-BFGL-NGS-25183	1	2	DOM	7/4	125/146	0.3575		1	ARS-BFGL-NGS-25183	1	2	REC	3/8	15/256	0.0262
1	ARS-BFGL-BAC-7317	2703664	1	0.3636	0.214	2	0.114	2.099		1	ARS-BFGL-BAC-7317	1	2	DOM	6/5	105/166	0.3512		1	ARS-BFGL-BAC-7317	1	2	REC	2/9	11/260	0.08534
1	ARS-BFGL-NGS-29653	2769164	1	0.5	0.3007	2	0.05918	2.325		1	ARS-BFGL-NGS-29653	1	2	DOM	8/3	138/133	0.2206		1	ARS-BFGL-NGS-29653	1	2	REC	3/8	25/246	0.08417
1	BTA-120704-no-rs	2848684	1	0.3182	0.1863	2	0.1613	2.038		1	BTA-120704-no-rs	1	2	DOM	7/4	92/179	0.05526		1	BTA-120704-no-rs	1	2	REC	0/11	9/262	1
1	BovineHD0100000671	2952000	2	0.04545	0.03148	1	0.5181	1.465		1	BovineHD0100000671	2	1	DOM	1/10	17/253	0.5238		1	BovineHD0100000671	2	1	REC	0/11	0/270	1
1	BovineHD0100000681	2981856	1	0.1818	0.3407	2	0.1662	0.43		1	BovineHD0100000681	1	2	DOM	4/7	150/120	0.2324		1	BovineHD0100000681	1	2	REC	0/11	34/236	0.3709
1	BovineHD0100000687	2996976	2	0.05	0.1648	1	0.2251	0.2667		1	BovineHD0100000687	2	1	DOM	1/9	83/187	0.2907		1	BovineHD0100000687	2	1	REC	0/10	6/264	1
1	ARS-BFGL-NGS-115671	3033433	2	0.1364	0.3708	1	0.02419	0.2679		1	ARS-BFGL-NGS-115671	2	1	DOM	3/8	163/108	0.05567		1	ARS-BFGL-NGS-115671	2	1	REC	0/11	38/233	0.3703
1	BovineHD0100000719	3058587	1	0.2727	0.2741	2	1	0.9932		1	BovineHD0100000719	1	2	DOM	5/6	126/144	1		1	BovineHD0100000719	1	2	REC	1/10	22/248	1
1	BovineHD0100000722	3061615	1	0.2273	0.1852	2	0.5814	1.294		1	BovineHD0100000722	1	2	DOM	5/6	90/180	0.5169		1	BovineHD0100000722	1	2	REC	0/11	10/260	1
1	ARS-BFGL-NGS-21352	3135408	2	0.3636	0.3764	1	1	0.9468		1	ARS-BFGL-NGS-21352	2	1	DOM	6/5	162/109	0.7611		1	ARS-BFGL-NGS-21352	2	1	REC	2/9	42/229	0.6835
1	BovineHD4100000021	3172295	2	0.15	0.1741	1	1	0.8373		1	BovineHD4100000021	2	1	DOM	3/7	86/184	1		1	BovineHD4100000021	2	1	REC	0/10	8/262	1
1	ARS-BFGL-NGS-103391	3182687	2	0.04545	0.1458	1	0.3439	0.2791		1	ARS-BFGL-NGS-103391	2	1	DOM	1/10	71/200	0.2998		1	ARS-BFGL-NGS-103391	2	1	REC	0/11	8/263	1
1	BovineHD0100000805	3192208	1	0.55	0.4033	2	0.2467	1.808		1	BovineHD0100000805	1	2	DOM	8/2	176/93	0.5026		1	BovineHD0100000805	1	2	REC	3/7	41/228	0.1973
1	BovineHD0100000807	3195861	1	0.55	0.4056	2	0.2478	1.791		1	BovineHD0100000807	1	2	DOM	8/2	177/93	0.5029		1	BovineHD0100000807	1	2	REC	3/7	42/228	0.2056
1	ARS-BFGL-NGS-22858	3245141	2	0.09091	0.1679	1	0.5563	0.4956		1	ARS-BFGL-NGS-22858	2	1	DOM	2/9	85/186	0.5121		1	ARS-BFGL-NGS-22858	2	1	REC	0/11	6/265	1
1	BovineHD0100000837	3264758	1	0.1364	0.2127	2	0.5926	0.5845		1	BovineHD0100000837	1	2	DOM	3/8	103/165	0.5416		1	BovineHD0100000837	1	2	REC	0/11	11/257	1
1	BovineHD4100000025	3279233	2	0.1364	0.1617	1	1	0.8185		1	BovineHD4100000025	2	1	DOM	3/8	75/194	1		1	BovineHD4100000025	2	1	REC	0/11	12/257	1
1	BovineHD0100000857	3315582	1	0.2273	0.1554	2	0.3702	1.598		1	BovineHD0100000857	1	2	DOM	4/7	75/192	0.5137		1	BovineHD0100000857	1	2	REC	1/10	8/259	0.3084
1	BovineHD0100000861	3339918	2	0.4091	0.3265	1	0.4884	1.428		1	BovineHD0100000861	2	1	DOM	6/5	144/124	1		1	BovineHD0100000861	2	1	REC	3/8	31/237	0.1377
1	BovineHD0100000876	3387354	2	0.6111	0.4335	1	0.1526	2.054		1	BovineHD0100000876	2	1	DOM	7/2	179/84	0.7238		1	BovineHD0100000876	2	1	REC	4/5	49/214	0.07559
1	BovineHD0100000878	3389765	2	0.5909	0.4366	1	0.1897	1.864		1	BovineHD0100000878	2	1	DOM	8/3	184/84	1		1	BovineHD0100000878	2	1	REC	5/6	50/218	0.04425
1	BovineHD0100000895	3433143	1	0.5455	0.4345	2	0.3816	1.562		1	BovineHD0100000895	1	2	DOM	9/2	185/82	0.5135		1	BovineHD0100000895	1	2	REC	3/8	47/220	0.4227
1	ARS-BFGL-NGS-58892	3434539	1	0.4545	0.3358	2	0.2579	1.648		1	ARS-BFGL-NGS-58892	1	2	DOM	8/3	150/121	0.3572		1	ARS-BFGL-NGS-58892	1	2	REC	2/9	32/239	0.628
1	BovineHD0100000905	3462385	1	0.2273	0.3843	2	0.179	0.4712		1	BovineHD0100000905	1	2	DOM	5/6	168/100	0.3425		1	BovineHD0100000905	1	2	REC	0/11	38/230	0.3707
1	ARS-BFGL-NGS-98287	3470316	2	0.1364	0.3063	1	0.1002	0.3576		1	ARS-BFGL-NGS-98287	2	1	DOM	3/8	142/129	0.1289		1	ARS-BFGL-NGS-98287	2	1	REC	0/11	24/247	0.6072
1	BTB-00001612	3492221	2	0.09091	0.131	1	0.7552	0.6634		1	BTB-00001612	2	1	DOM	2/9	70/201	0.7349		1	BTB-00001612	2	1	REC	0/11	1/270	1
1	BovineHD0100000930	3504642	1	0.2273	0.3848	2	0.1789	0.4703		1	BovineHD0100000930	1	2	DOM	5/6	165/104	0.3506		1	BovineHD0100000930	1	2	REC	0/11	42/227	0.3799
1	ARS-BFGL-NGS-15775	3560291	2	0.09091	0.06642	1	0.6539	1.406		1	ARS-BFGL-NGS-15775	2	1	DOM	2/9	34/237	0.6373		1	ARS-BFGL-NGS-15775	2	1	REC	0/11	2/269	1
1	BovineHD0100000956	3579296	1	0.1818	0.1343	2	0.5235	1.432		1	BovineHD0100000956	1	2	DOM	4/7	67/201	0.4792		1	BovineHD0100000956	1	2	REC	0/11	5/263	1
1	ARS-BFGL-NGS-59192	3599891	2	0.04545	0.02037	1	0.3837	2.29		1	ARS-BFGL-NGS-59192	2	1	DOM	1/10	11/259	0.3868		1	ARS-BFGL-NGS-59192	2	1	REC	0/11	0/270	1
1	BovineHD0100000971	3611248	1	0.6818	0.4925	2	0.1261	2.208		1	BovineHD0100000971	1	2	DOM	10/1	201/67	0.3051		1	BovineHD0100000971	1	2	REC	5/6	63/205	0.1438
1	BovineHD0100000973	3616076	2	0.09091	0.3606	1	0.01034	0.1773		1	BovineHD0100000973	2	1	DOM	2/9	167/102	0.008141		1	BovineHD0100000973	2	1	REC	0/11	27/242	0.6079
1	BTB-00001299	3653664	2	0.04545	0.238	1	0.03706	0.1525		1	BTB-00001299	2	1	DOM	1/10	115/156	0.02988		1	BTB-00001299	2	1	REC	0/11	14/257	1
1	BovineHD0100046373	3667130	1	0.1364	0.08868	2	0.4391	1.623		1	BovineHD0100046373	1	2	DOM	3/8	43/222	0.4004		1	BovineHD0100046373	1	2	REC	0/11	4/261	1
1	ARS-BFGL-NGS-37412	3687775	2	0.2727	0.4336	1	0.1867	0.4899		1	ARS-BFGL-NGS-37412	2	1	DOM	6/5	185/86	0.341		1	ARS-BFGL-NGS-37412	2	1	REC	0/11	50/221	0.2223
1	BovineHD0100001003	3701702	1	0.2727	0.1766	2	0.2583	1.749		1	BovineHD0100001003	1	2	DOM	6/5	84/185	0.1835		1	BovineHD0100001003	1	2	REC	0/11	11/258	1
1	BovineHD4100000029	3704712	2	0.09091	0.2823	1	0.05207	0.2542		1	BovineHD4100000029	2	1	DOM	1/10	132/139	0.01155		1	BovineHD4100000029	2	1	REC	1/10	21/250	0.5976
1	BovineHD0100001009	3717415	2	0.7273	0.4832	1	0.02929	2.852		1	BovineHD0100001009	2	1	DOM	10/1	198/70	0.2999		1	BovineHD0100001009	2	1	REC	6/5	61/207	0.02579
1	ARS-BFGL-NGS-16784	3721639	1	0.1364	0.07749	2	0.4074	1.88		1	ARS-BFGL-NGS-16784	1	2	DOM	3/8	40/231	0.3824		1	ARS-BFGL-NGS-16784	1	2	REC	0/11	2/269	1
1	BTB-00001074	3826765	2	0.5455	0.4815	1	0.6649	1.292		1	BTB-00001074	2	1	DOM	9/2	193/78	0.7338		1	BTB-00001074	2	1	REC	3/8	68/203	1
1	BovineHD0100001041	3840517	2	0.1364	0.1835	1	0.7798	0.7025		1	BovineHD0100001041	2	1	DOM	2/9	91/176	0.3456		1	BovineHD0100001041	2	1	REC	1/10	7/260	0.2791
1	BovineHD0100001043	3849812	1	0	0.21	2	0.01188	0		1	BovineHD0100001043	1	2	DOM	0/11	99/170	0.0092		1	BovineHD0100001043	1	2	REC	0/11	14/255	1
1	ARS-BFGL-NGS-43924	3859505	2	0.2273	0.3247	1	0.485	0.6116		1	ARS-BFGL-NGS-43924	2	1	DOM	5/6	145/126	0.7602		1	ARS-BFGL-NGS-43924	2	1	REC	0/11	31/240	0.6166
1	BovineHD0100001045	3861516	1	0.2727	0.2566	2	0.8078	1.087		1	BovineHD0100001045	1	2	DOM	6/5	117/150	0.5451		1	BovineHD0100001045	1	2	REC	0/11	20/247	1
1	BovineHD0100001052	3888198	1	0.1818	0.3228	2	0.2416	0.4663		1	BovineHD0100001052	1	2	DOM	3/8	142/126	0.1259		1	BovineHD0100001052	1	2	REC	1/10	31/237	1
1	ARS-BFGL-NGS-30999	3908027	2	0.5	0.4151	1	0.51	1.409		1	ARS-BFGL-NGS-30999	2	1	DOM	9/2	179/92	0.3465		1	ARS-BFGL-NGS-30999	2	1	REC	2/9	46/225	1
1	ARS-USMARC-Parent-DQ381153-rs29012842	3958867	2	0.4091	0.3339	1	0.4938	1.381		1	ARS-USMARC-Parent-DQ381153-rs29012842	2	1	DOM	7/4	152/119	0.761		1	ARS-USMARC-Parent-DQ381153-rs29012842	2	1	REC	2/9	29/242	0.3456
1	BovineHD0100001083	3973178	2	0.1818	0.1098	1	0.2963	1.801		1	BovineHD0100001083	2	1	DOM	3/8	55/209	0.7048		1	BovineHD0100001083	2	1	REC	1/10	3/261	0.1514
1	BovineHD0100001088	3989772	2	0.04545	0.08022	1	1	0.546		1	BovineHD0100001088	2	1	DOM	1/10	40/228	1		1	BovineHD0100001088	2	1	REC	0/11	3/265	1
1	BovineHD0100001098	4027625	1	0.2727	0.4216	2	0.1906	0.5144		1	BovineHD0100001098	1	2	DOM	5/6	175/93	0.2057		1	BovineHD0100001098	1	2	REC	1/10	51/217	0.6956
1	ARS-BFGL-NGS-107481	4052172	2	0.4091	0.2907	1	0.2393	1.689		1	ARS-BFGL-NGS-107481	2	1	DOM	7/4	131/139	0.3708		1	ARS-BFGL-NGS-107481	2	1	REC	2/9	26/244	0.3011
1	BovineHD0100001109	4070299	2	0.1818	0.1381	1	0.5312	1.387		1	BovineHD0100001109	2	1	DOM	3/8	68/200	1		1	BovineHD0100001109	2	1	REC	1/10	6/262	0.2478
1	BTA-31687-no-rs	4113357	2	0.4091	0.3247	1	0.4875	1.44		1	BTA-31687-no-rs	2	1	DOM	7/4	152/119	0.761		1	BTA-31687-no-rs	2	1	REC	2/9	24/247	0.2688
1	BovineHD0100001143	4155630	1	0.5	0.3937	2	0.3757	1.54		1	BovineHD0100001143	1	2	DOM	8/3	166/102	0.5437		1	BovineHD0100001143	1	2	REC	3/8	45/223	0.409
1	BTA-32603-no-rs	4168130	2	0.04545	0.06827	1	1	0.6499		1	BTA-32603-no-rs	2	1	DOM	1/10	36/235	1		1	BTA-32603-no-rs	2	1	REC	0/11	1/270	1
1	BovineHD0100001154	4181558	2	0	0.06716	1	0.3869	0		1	BovineHD0100001154	2	1	DOM	0/11	36/232	0.3693		1	BovineHD0100001154	2	1	REC	0/11	0/268	1
1	BovineHD0100001164	4224302	1	0.1818	0.2973	2	0.3397	0.5251		1	BovineHD0100001164	1	2	DOM	3/8	130/134	0.2199		1	BovineHD0100001164	1	2	REC	1/10	27/237	1
1	BovineHD0100001169	4238490	1	0.5556	0.4453	2	0.4709	1.557		1	BovineHD0100001169	1	2	DOM	8/1	186/79	0.4555		1	BovineHD0100001169	1	2	REC	2/7	50/215	0.6812
1	ARS-BFGL-NGS-69957	4250046	1	0.5455	0.4317	2	0.3809	1.579		1	ARS-BFGL-NGS-69957	1	2	DOM	10/1	186/85	0.1817		1	ARS-BFGL-NGS-69957	1	2	REC	2/9	48/223	1
1	BovineHD0100001174	4254712	2	0.3636	0.3472	1	1	1.075		1	BovineHD0100001174	2	1	DOM	7/4	154/111	0.7669		1	BovineHD0100001174	2	1	REC	1/10	30/235	1
1	BovineHD0100001177	4267089	2	0.2273	0.1863	1	0.5833	1.284		1	BovineHD0100001177	2	1	DOM	4/7	88/183	0.753		1	BovineHD0100001177	2	1	REC	1/10	13/258	0.4348
1	ARS-BFGL-NGS-43005	4276065	1	0.3182	0.2528	2	0.4632	1.38		1	ARS-BFGL-NGS-43005	1	2	DOM	6/5	113/158	0.5358		1	ARS-BFGL-NGS-43005	1	2	REC	1/10	24/247	1
1	Hapmap59750-rs29024375	4309205	1	0.6818	0.4871	2	0.084	2.256		1	Hapmap59750-rs29024375	1	2	DOM	10/1	198/73	0.2984		1	Hapmap59750-rs29024375	1	2	REC	5/6	66/205	0.1516
1	BovineHD0100001215	4318690	1	0.04545	0.04682	2	1	0.9695		1	BovineHD0100001215	1	2	DOM	1/10	25/242	1		1	BovineHD0100001215	1	2	REC	0/11	0/267	1
1	BTB-00002335	4335252	1	0	0.04428	2	0.6164	0		1	BTB-00002335	1	2	DOM	0/11	24/247	0.6072		1	BTB-00002335	1	2	REC	0/11	0/271	1
1	BovineHD0100001246	4418006	2	0.1364	0.08209	1	0.4191	1.766		1	BovineHD0100001246	2	1	DOM	3/8	42/226	0.3928		1	BovineHD0100001246	2	1	REC	0/11	2/266	1
1	ARS-BFGL-NGS-81011	4494007	2	0.3636	0.2638	1	0.3273	1.594		1	ARS-BFGL-NGS-81011	2	1	DOM	7/4	124/147	0.3565		1	ARS-BFGL-NGS-81011	2	1	REC	1/10	19/252	0.5615
1	BovineHD0100001276	4509506	1	0.4545	0.3937	2	0.6577	1.284		1	BovineHD0100001276	1	2	DOM	8/3	166/102	0.5437		1	BovineHD0100001276	1	2	REC	2/9	45/223	1
1	BTB-00003162	4547357	2	0.04545	0.08487	1	1	0.5135		1	BTB-00003162	2	1	DOM	1/10	44/227	1		1	BTB-00003162	2	1	REC	0/11	2/269	1
1	BTB-00002966	4615149	2	0.4545	0.2934	1	0.1514	2.007		1	BTB-00002966	2	1	DOM	9/2	134/137	0.0606		1	BTB-00002966	2	1	REC	1/10	25/246	1
1	BTA-34568-no-rs	4729973	2	0.3636	0.3007	1	0.6363	1.329		1	BTA-34568-no-rs	2	1	DOM	7/4	137/134	0.5417		1	BTA-34568-no-rs	2	1	REC	1/10	26/245	1
1	Hapmap42913-BTA-33619	4752971	1	0.4545	0.4483	2	1	1.025		1	Hapmap42913-BTA-33619	1	2	DOM	8/3	186/85	1		1	Hapmap42913-BTA-33619	1	2	REC	2/9	57/214	1
1	BovineHD0100001370	4781618	2	0.5	0.4659	1	0.8139	1.146		1	BovineHD0100001370	2	1	DOM	7/2	185/79	1		1	BovineHD0100001370	2	1	REC	2/7	61/203	1
1	BTB-00002687	4804971	1	0	0.05926	2	0.6288	0		1	BTB-00002687	1	2	DOM	0/11	32/238	0.6204		1	BTB-00002687	1	2	REC	0/11	0/270	1
1	BovineHD0100001385	4856702	2	0	0.05576	1	0.623	0		1	BovineHD0100001385	2	1	DOM	0/11	28/241	0.6095		1	BovineHD0100001385	2	1	REC	0/11	2/267	1
1	BovineHD0100001392	4882775	2	0	0.03321	1	1	0		1	BovineHD0100001392	2	1	DOM	0/11	18/253	1		1	BovineHD0100001392	2	1	REC	0/11	0/271	1
1	BovineHD0100001394	4890114	2	0.09091	0.03731	1	0.2132	2.58		1	BovineHD0100001394	2	1	DOM	2/9	20/248	0.2117		1	BovineHD0100001394	2	1	REC	0/11	0/268	1
1	BTB-01747944	4982601	1	0.1364	0.03875	2	0.0612	3.917		1	BTB-01747944	1	2	DOM	3/8	21/250	0.05686		1	BTB-01747944	1	2	REC	0/11	0/271	1
1	BovineHD0100001409	4986559	2	0.5909	0.4291	1	0.187	1.922		1	BovineHD0100001409	2	1	DOM	10/1	179/89	0.1113		1	BovineHD0100001409	2	1	REC	3/8	51/217	0.4501
1	BTB-01991572	4991120	2	0.09091	0.03333	1	0.1817	2.9		1	BTB-01991572	2	1	DOM	2/9	18/252	0.1798		1	BTB-01991572	2	1	REC	0/11	0/270	1
1	BovineHD0100001411	4991864	1	0.5909	0.4244	2	0.1302	1.959		1	BovineHD0100001411	1	2	DOM	10/1	179/92	0.1081		1	BovineHD0100001411	1	2	REC	3/8	51/220	0.4458
1	BTB-02105769	5012080	1	0.5909	0.4557	2	0.2758	1.725		1	BTB-02105769	1	2	DOM	10/1	191/80	0.1868		1	BTB-02105769	1	2	REC	3/8	56/215	0.7039
1	BovineHD0100001418	5037720	2	0.09091	0.05037	1	0.3188	1.885		1	BovineHD0100001418	2	1	DOM	2/9	27/241	0.3197		1	BovineHD0100001418	2	1	REC	0/11	0/268	1
1	ARS-BFGL-NGS-65157	5044963	1	0.4091	0.2749	2	0.2235	1.826		1	ARS-BFGL-NGS-65157	1	2	DOM	7/4	127/144	0.3604		1	ARS-BFGL-NGS-65157	1	2	REC	2/9	22/249	0.2383
1	BovineHD0100001424	5058523	2	0.6364	0.4244	1	0.07678	2.374		1	BovineHD0100001424	2	1	DOM	10/1	182/89	0.1829		1	BovineHD0100001424	2	1	REC	4/7	48/223	0.1241
1	BovineHD0100001438	5087212	2	0.6364	0.3899	1	0.02597	2.738		1	BovineHD0100001438	2	1	DOM	10/1	174/94	0.1049		1	BovineHD0100001438	2	1	REC	4/7	35/233	0.05206
1	BovineHD0100001441	5099108	1	0.4545	0.3078	2	0.1621	1.874		1	BovineHD0100001441	1	2	DOM	8/3	138/130	0.2229		1	BovineHD0100001441	1	2	REC	2/9	27/241	0.3197
1	BTB-01996267	5147933	1	0.04545	0.0941	2	0.7107	0.4585		1	BTB-01996267	1	2	DOM	1/10	49/222	0.6954		1	BTB-01996267	1	2	REC	0/11	2/269	1
1	Hapmap38555-BTA-101264	5338825	2	0.3182	0.1937	1	0.1712	1.942		1	Hapmap38555-BTA-101264	2	1	DOM	7/4	93/178	0.05748		1	Hapmap38555-BTA-101264	2	1	REC	0/11	12/259	1
1	BovineHD0100001507	5372683	1	0.4545	0.3643	2	0.4991	1.454		1	BovineHD0100001507	1	2	DOM	8/3	160/109	0.5344		1	BovineHD0100001507	1	2	REC	2/9	36/233	0.6491
1	BTB-01160486	5384710	1	0.3182	0.19	2	0.1659	1.989		1	BTB-01160486	1	2	DOM	7/4	91/180	0.05317		1	BTB-01160486	1	2	REC	0/11	12/259	1
1	Hapmap60540-rs29021339	5462172	2	0.1818	0.3007	1	0.3403	0.5167		1	Hapmap60540-rs29021339	2	1	DOM	4/7	137/134	0.5406		1	Hapmap60540-rs29021339	2	1	REC	0/11	26/245	0.6069
1	BovineHD0100001535	5475277	2	0	0.1685	1	0.03465	0		1	BovineHD0100001535	2	1	DOM	0/11	82/185	0.03726		1	BovineHD0100001535	2	1	REC	0/11	8/259	1
1	BovineHD0100001536	5482005	1	0.5	0.4944	2	1	1.023		1	BovineHD0100001536	1	2	DOM	10/1	203/64	0.467		1	BovineHD0100001536	1	2	REC	1/10	61/206	0.4653
1	Hapmap60652-rs29022048	5519231	2	0.09091	0.3413	1	0.01843	0.193		1	Hapmap60652-rs29022048	2	1	DOM	2/9	155/116	0.01312		1	Hapmap60652-rs29022048	2	1	REC	0/11	30/241	0.6136
1	BTB-01160178	5562248	1	0	0.1273	2	0.09425	0		1	BTB-01160178	1	2	DOM	0/11	66/205	0.07279		1	BTB-01160178	1	2	REC	0/11	3/268	1
1	BovineHD0100001579	5569070	1	0.04545	0.161	2	0.2278	0.2482		1	BovineHD0100001579	1	2	DOM	1/10	79/185	0.1849		1	BovineHD0100001579	1	2	REC	0/11	6/258	1
1	BovineHD0100001591	5612484	2	0.6364	0.3116	1	0.003944	3.867		1	BovineHD0100001591	2	1	DOM	10/1	144/124	0.02574		1	BovineHD0100001591	2	1	REC	4/7	23/245	0.01444
1	Hapmap43435-BTA-101251	5615120	2	0.3182	0.214	1	0.2895	1.714		1	Hapmap43435-BTA-101251	2	1	DOM	6/5	104/167	0.3486		1	Hapmap43435-BTA-101251	2	1	REC	1/10	12/259	0.4107
1	BovineHD0100001596	5629126	1	0.1818	0.4049	2	0.04417	0.3267		1	BovineHD0100001596	1	2	DOM	4/7	170/98	0.1086		1	BovineHD0100001596	1	2	REC	0/11	47/221	0.2206
1	ARS-BFGL-NGS-111125	5644654	2	0.1818	0.0738	1	0.08357	2.789		1	ARS-BFGL-NGS-111125	2	1	DOM	4/7	38/233	0.06408		1	ARS-BFGL-NGS-111125	2	1	REC	0/11	2/269	1
1	BovineHD0100001610	5657951	1	0	0.03545	2	1	0		1	BovineHD0100001610	1	2	DOM	0/11	19/249	1		1	BovineHD0100001610	1	2	REC	0/11	0/268	1
1	BTB-01160026	5668141	1	0.3636	0.3967	2	0.8271	0.8691		1	BTB-01160026	1	2	DOM	8/3	168/103	0.5441		1	BTB-01160026	1	2	REC	0/11	47/224	0.2207
1	BTB-01159977	5692100	1	0.04545	0.03333	2	0.5376	1.381		1	BTB-01159977	1	2	DOM	1/10	18/252	0.5437		1	BTB-01159977	1	2	REC	0/11	0/270	1
1	BTB-01159966	5720949	2	0.04545	0.02952	1	0.4966	1.565		1	BTB-01159966	2	1	DOM	1/10	16/255	0.5018		1	BTB-01159966	2	1	REC	0/11	0/271	1
1	BovineHD0100001629	5730545	2	0.04545	0.09888	1	0.7121	0.434		1	BovineHD0100001629	2	1	DOM	1/10	48/220	0.6955		1	BovineHD0100001629	2	1	REC	0/11	5/263	1
1	BovineHD0100001633	5744744	1	0.2273	0.3787	2	0.1808	0.4825		1	BovineHD0100001633	1	2	DOM	5/6	158/110	0.5343		1	BovineHD0100001633	1	2	REC	0/11	45/223	0.2215
1	Hapmap44178-BTA-101248	5745330	2	0	0.04613	1	0.616	0		1	Hapmap44178-BTA-101248	2	1	DOM	0/11	25/246	0.6067		1	Hapmap44178-BTA-101248	2	1	REC	0/11	0/271	1
1	BovineHD0100001637	5749728	2	0.4545	0.4777	1	1	0.9112		1	BovineHD0100001637	2	1	DOM	9/2	201/68	0.7365		1	BovineHD0100001637	2	1	REC	1/10	56/213	0.4714
1	ARS-BFGL-NGS-114983	5768796	2	0.2727	0.3708	1	0.499	0.6362		1	ARS-BFGL-NGS-114983	2	1	DOM	6/5	165/106	0.7567		1	ARS-BFGL-NGS-114983	2	1	REC	0/11	36/235	0.3694
1	BovineHD0100001660	5803981	1	0.4091	0.4496	2	0.828	0.8474		1	BovineHD0100001660	1	2	DOM	7/4	185/83	0.744		1	BovineHD0100001660	1	2	REC	2/9	56/212	1
1	BovineHD0100001664	5822399	2	0.2727	0.2108	1	0.4377	1.404		1	BovineHD0100001664	2	1	DOM	6/5	102/166	0.3465		1	BovineHD0100001664	2	1	REC	0/11	11/257	1
1	BovineHD0100001667	5834595	1	0.4091	0.291	2	0.2397	1.686		1	BovineHD0100001667	1	2	DOM	7/4	135/133	0.5413		1	BovineHD0100001667	1	2	REC	2/9	21/247	0.2269
1	BovineHD0100001678	5871590	1	0.2	0.3647	2	0.1584	0.4356		1	BovineHD0100001678	1	2	DOM	4/6	151/115	0.3422		1	BovineHD0100001678	1	2	REC	0/10	43/223	0.3703
1	BovineHD0100001688	5901795	2	0.2727	0.1556	1	0.1429	2.036		1	BovineHD0100001688	2	1	DOM	6/5	78/192	0.09141		1	BovineHD0100001688	2	1	REC	0/11	6/264	1
1	BTB-01728863	5909634	1	0.2727	0.3284	2	0.6509	0.7669		1	BTB-01728863	1	2	DOM	6/5	145/126	1		1	BTB-01728863	1	2	REC	0/11	33/238	0.373
1	BTB-00003983	5945833	1	0.4091	0.1815	2	0.02169	3.122		1	BTB-00003983	1	2	DOM	8/3	88/182	0.009136		1	BTB-00003983	1	2	REC	1/10	10/260	0.3607
1	BovineHD0100001699	5948205	1	0.5909	0.4777	2	0.3849	1.579		1	BovineHD0100001699	1	2	DOM	10/1	191/78	0.1897		1	BovineHD0100001699	1	2	REC	3/8	66/203	0.7353
1	BovineHD4100000041	5968632	1	0.4	0.3246	2	0.4752	1.387		1	BovineHD4100000041	1	2	DOM	8/2	147/121	0.1934		1	BovineHD4100000041	1	2	REC	0/10	27/241	0.6055
1	BovineHD0100001705	5979118	1	0.09091	0.416	2	0.001565	0.1404		1	BovineHD0100001705	1	2	DOM	2/9	178/90	0.001884		1	BovineHD0100001705	1	2	REC	0/11	45/223	0.2215
1	ARS-BFGL-NGS-100349	5985024	2	0.3182	0.1753	1	0.09427	2.196		1	ARS-BFGL-NGS-100349	2	1	DOM	7/4	84/187	0.04219		1	ARS-BFGL-NGS-100349	2	1	REC	0/11	11/260	1
1	BovineHD0100001716	5991427	2	0.5909	0.4554	1	0.2756	1.727		1	BovineHD0100001716	2	1	DOM	11/0	192/77	0.03854		1	BovineHD0100001716	2	1	REC	2/9	53/216	1
1	BTA-122021-no-rs	6038527	2	0.04545	0.1863	1	0.1518	0.2079		1	BTA-122021-no-rs	2	1	DOM	1/10	90/181	0.1113		1	BTA-122021-no-rs	2	1	REC	0/11	11/260	1
1	BTB-00003770	6062518	2	0.2727	0.262	1	1	1.056		1	BTB-00003770	2	1	DOM	6/5	121/150	0.551		1	BTB-00003770	2	1	REC	0/11	21/250	1
1	BTB-00003715	6092662	2	0.2727	0.2638	1	1	1.046		1	BTB-00003715	2	1	DOM	6/5	122/149	0.5539		1	BTB-00003715	2	1	REC	0/11	21/250	1
1	BovineHD0100001759	6133181	2	0.4091	0.3086	1	0.3503	1.551		1	BovineHD0100001759	2	1	DOM	8/3	141/128	0.2281		1	BovineHD0100001759	2	1	REC	1/10	25/244	1
1	BovineHD0100001769	6154670	1	0.09091	0.2185	2	0.1907	0.3576		1	BovineHD0100001769	1	2	DOM	2/9	107/163	0.2119		1	BovineHD0100001769	1	2	REC	0/11	11/259	1
1	Hapmap38892-BTA-36614	6160986	2	0.1364	0.07011	1	0.2098	2.094		1	Hapmap38892-BTA-36614	2	1	DOM	3/8	38/233	0.2043		1	Hapmap38892-BTA-36614	2	1	REC	0/11	0/271	1
1	BTB-00003652	6184195	2	0.1364	0.1125	1	0.7288	1.245		1	BTB-00003652	2	1	DOM	3/8	59/212	0.711		1	BTB-00003652	2	1	REC	0/11	2/269	1
1	BTA-120711-no-rs	6205654	1	0.5	0.2934	2	0.05528	2.409		1	BTA-120711-no-rs	1	2	DOM	9/2	141/130	0.06616		1	BTA-120711-no-rs	1	2	REC	2/9	18/253	0.1787
1	BovineHD0100001788	6213780	1	0.4091	0.444	2	0.8288	0.8668		1	BovineHD0100001788	1	2	DOM	7/4	192/76	0.5175		1	BovineHD0100001788	1	2	REC	2/9	46/222	1
1	BovineHD0100001805	6251669	2	0.09091	0.09294	1	1	0.976		1	BovineHD0100001805	2	1	DOM	2/9	47/222	1		1	BovineHD0100001805	2	1	REC	0/11	3/266	1
1	BTA-35637-no-rs	6274384	2	0.5455	0.4834	1	0.6653	1.282		1	BTA-35637-no-rs	2	1	DOM	9/2	201/70	0.7349		1	BTA-35637-no-rs	2	1	REC	3/8	61/210	0.7166
1	ARS-BFGL-NGS-115182	6313376	1	0.4091	0.3284	2	0.4896	1.416		1	ARS-BFGL-NGS-115182	1	2	DOM	7/4	145/126	0.5548		1	ARS-BFGL-NGS-115182	1	2	REC	2/9	33/238	0.6325
1	BovineHD0100001854	6366473	1	0.5	0.3266	2	0.1071	2.062		1	BovineHD0100001854	1	2	DOM	8/3	146/125	0.3551		1	BovineHD0100001854	1	2	REC	3/8	31/240	0.1344
1	BTA-35598-no-rs	6375330	2	0.04545	0.02583	1	0.4537	1.796		1	BTA-35598-no-rs	2	1	DOM	1/10	14/257	0.458		1	BTA-35598-no-rs	2	1	REC	0/11	0/271	1
1	BovineHD0100001857	6384709	2	0.4545	0.2926	1	0.1511	2.015		1	BovineHD0100001857	2	1	DOM	7/4	129/141	0.3654		1	BovineHD0100001857	2	1	REC	3/8	29/241	0.1175
1	BovineHD0100001865	6403787	2	0.45	0.317	1	0.2275	1.763		1	BovineHD0100001865	2	1	DOM	7/3	138/127	0.3422		1	BovineHD0100001865	2	1	REC	2/8	30/235	0.3279
1	Hapmap58931-rs29010773	6404933	2	0.1364	0.0738	1	0.231	1.982		1	Hapmap58931-rs29010773	2	1	DOM	3/8	40/231	0.3824		1	Hapmap58931-rs29010773	2	1	REC	0/11	0/271	1
1	BovineHD0100001869	6415835	1	0.4091	0.2714	2	0.2215	1.859		1	BovineHD0100001869	1	2	DOM	7/4	122/147	0.3556		1	BovineHD0100001869	1	2	REC	2/9	24/245	0.2716
1	BTA-15152-rs29026517	6440092	2	0.09091	0.04797	1	0.2992	1.985		1	BTA-15152-rs29026517	2	1	DOM	2/9	26/245	0.2995		1	BTA-15152-rs29026517	2	1	REC	0/11	0/271	1
1	BovineHD0100001883	6449771	2	0.1	0.07736	1	0.6643	1.325		1	BovineHD0100001883	2	1	DOM	2/8	41/224	0.6586		1	BovineHD0100001883	2	1	REC	0/10	0/265	1
1	BovineHD0100001895	6482306	1	0.4091	0.2249	2	0.06691	2.386		1	BovineHD0100001895	1	2	DOM	7/4	106/163	0.1257		1	BovineHD0100001895	1	2	REC	2/9	15/254	0.1381
1	BovineHD0100001899	6498668	1	0.4091	0.3234	2	0.4869	1.448		1	BovineHD0100001899	1	2	DOM	7/4	145/124	0.7592		1	BovineHD0100001899	1	2	REC	2/9	29/240	0.349
1	BovineHD0100001914	6539650	2	0.09091	0.03903	1	0.2269	2.462		1	BovineHD0100001914	2	1	DOM	2/9	21/248	0.2256		1	BovineHD0100001914	2	1	REC	0/11	0/269	1
1	Hapmap36132-SCAFFOLD45728_8109	6568614	1	0.3636	0.363	2	1	1.003		1	Hapmap36132-SCAFFOLD45728_8109	1	2	DOM	7/4	167/103	1		1	Hapmap36132-SCAFFOLD45728_8109	1	2	REC	1/10	29/241	1
1	ARS-BFGL-NGS-113844	6598700	1	0.1364	0.2122	2	0.5926	0.5863		1	ARS-BFGL-NGS-113844	1	2	DOM	3/8	101/170	0.7515		1	ARS-BFGL-NGS-113844	1	2	REC	0/11	14/257	1
1	BTB-01489336	6656130	2	0.09091	0.1255	1	1	0.6971		1	BTB-01489336	2	1	DOM	2/9	64/207	1		1	BTB-01489336	2	1	REC	0/11	4/267	1
1	BovineHD0100001962	6659142	2	0.1818	0.1734	1	1	1.059		1	BovineHD0100001962	2	1	DOM	4/7	84/187	0.7442		1	BovineHD0100001962	2	1	REC	0/11	10/261	1
1	ARS-BFGL-NGS-115389	6683341	1	0.3636	0.2749	2	0.3431	1.507		1	ARS-BFGL-NGS-115389	1	2	DOM	7/4	126/145	0.3588		1	ARS-BFGL-NGS-115389	1	2	REC	1/10	23/248	1
1	BovineHD0100001976	6712326	2	0.1364	0.213	1	0.5928	0.5835		1	BovineHD0100001976	2	1	DOM	3/8	101/169	0.7515		1	BovineHD0100001976	2	1	REC	0/11	14/256	1
1	BovineHD0100001978	6722062	2	0.09091	0.08614	1	1	1.061		1	BovineHD0100001978	2	1	DOM	2/9	45/222	1		1	BovineHD0100001978	2	1	REC	0/11	1/266	1
1	BTB-01489466	6740664	1	0.4091	0.3007	2	0.3441	1.61		1	BTB-01489466	1	2	DOM	9/2	133/138	0.06038		1	BTB-01489466	1	2	REC	0/11	30/241	0.6136
1	BovineHD0100001991	6781489	1	0.4091	0.4777	2	0.6643	0.757		1	BovineHD0100001991	1	2	DOM	8/3	190/79	1		1	BovineHD0100001991	1	2	REC	1/10	67/202	0.3058
1	BovineHD0100001996	6796330	2	0.04545	0.09444	1	0.7107	0.4566		1	BovineHD0100001996	2	1	DOM	1/10	48/222	0.6957		1	BovineHD0100001996	2	1	REC	0/11	3/267	1
1	BovineHD0100002000	6812013	2	0.25	0.3504	1	0.4748	0.618		1	BovineHD0100002000	2	1	DOM	4/6	146/118	0.3559		1	BovineHD0100002000	2	1	REC	1/9	39/225	1
1	Hapmap56173-ss46526166	6813154	1	0.7273	0.4815	2	0.02894	2.871		1	Hapmap56173-ss46526166	1	2	DOM	10/1	204/67	0.4701		1	Hapmap56173-ss46526166	1	2	REC	6/5	57/214	0.01796
1	BovineHD0100002001	6813575	2	0.2727	0.277	1	1	0.979		1	BovineHD0100002001	2	1	DOM	5/6	126/143	1		1	BovineHD0100002001	2	1	REC	1/10	23/246	1
1	Hapmap51901-BTA-42438	6844784	1	0.7273	0.4815	2	0.02894	2.871		1	Hapmap51901-BTA-42438	1	2	DOM	10/1	204/67	0.4701		1	Hapmap51901-BTA-42438	1	2	REC	6/5	57/214	0.01796
1	BovineHD0100002023	6893254	1	0.04545	0.1654	2	0.2304	0.2402		1	BovineHD0100002023	1	2	DOM	1/10	80/189	0.1858		1	BovineHD0100002023	1	2	REC	0/11	9/260	1
1	BTA-43315-no-rs	6910759	2	0.6364	0.4889	1	0.197	1.829		1	BTA-43315-no-rs	2	1	DOM	10/1	205/66	0.4685		1	BTA-43315-no-rs	2	1	REC	4/7	60/211	0.2776
1	BovineHD0100002036	6925674	2	0.1	0.2094	1	0.3952	0.4194		1	BovineHD0100002036	2	1	DOM	2/8	100/165	0.3315		1	BovineHD0100002036	2	1	REC	0/10	11/254	1
1	ARS-BFGL-NGS-109057	6963461	2	0.2727	0.4557	1	0.1248	0.4479		1	ARS-BFGL-NGS-109057	2	1	DOM	5/6	190/81	0.09983		1	ARS-BFGL-NGS-109057	2	1	REC	1/10	57/214	0.4702
1	BovineHD0100002068	7002644	1	0.09091	0.2148	2	0.1925	0.3655		1	BovineHD0100002068	1	2	DOM	2/9	103/167	0.2194		1	BovineHD0100002068	1	2	REC	0/11	13/257	1
1	ARS-BFGL-NGS-41525	7022169	2	0.5909	0.4926	1	0.3926	1.488		1	ARS-BFGL-NGS-41525	2	1	DOM	9/2	206/65	1		1	ARS-BFGL-NGS-41525	2	1	REC	4/7	61/210	0.284
1	BovineHD0100002084	7036520	2	0.3182	0.3741	1	0.6593	0.7809		1	BovineHD0100002084	2	1	DOM	6/5	160/110	0.7635		1	BovineHD0100002084	2	1	REC	1/10	42/228	1
1	BovineHD0100002101	7059775	2	0.15	0.05682	1	0.1124	2.929		1	BovineHD0100002101	2	1	DOM	3/7	30/234	0.106		1	BovineHD0100002101	2	1	REC	0/10	0/264	1
1	Hapmap34831-BES10_Contig712_1090	7071121	2	0.04545	0.1384	1	0.3393	0.2965		1	Hapmap34831-BES10_Contig712_1090	2	1	DOM	1/10	73/198	0.2984		1	Hapmap34831-BES10_Contig712_1090	2	1	REC	0/11	2/269	1
1	BovineHD0100002124	7144946	1	0.4091	0.2313	2	0.07166	2.3		1	BovineHD0100002124	1	2	DOM	8/3	107/161	0.05575		1	BovineHD0100002124	1	2	REC	1/10	17/251	0.5265
1	BovineHD0100002127	7159731	2	0.5556	0.454	1	0.4734	1.503		1	BovineHD0100002127	2	1	DOM	8/1	189/72	0.4519		1	BovineHD0100002127	2	1	REC	2/7	48/213	0.6742
1	BTA-44295-no-rs	7164618	1	0.3636	0.2185	2	0.1199	2.044		1	BTA-44295-no-rs	1	2	DOM	7/4	104/166	0.1191		1	BTA-44295-no-rs	1	2	REC	1/10	14/256	0.4592
1	BTA-44308-no-rs	7202401	2	0.1	0.2193	1	0.273	0.3955		1	BTA-44308-no-rs	2	1	DOM	2/8	108/161	0.3245		1	BTA-44308-no-rs	2	1	REC	0/10	10/259	1
1	BTA-45181-no-rs	7260253	2	0.4545	0.4483	1	1	1.025		1	BTA-45181-no-rs	2	1	DOM	8/3	187/84	1		1	BTA-45181-no-rs	2	1	REC	2/9	56/215	1
1	ARS-BFGL-NGS-11803	7280774	2	0.2273	0.2066	1	0.7904	1.129		1	ARS-BFGL-NGS-11803	2	1	DOM	5/6	95/176	0.5277		1	ARS-BFGL-NGS-11803	2	1	REC	0/11	17/254	1
1	BTA-45221-no-rs	7311182	2	0.5909	0.4779	1	0.385	1.578		1	BTA-45221-no-rs	2	1	DOM	9/2	200/71	0.7341		1	BTA-45221-no-rs	2	1	REC	4/7	59/212	0.2715
1	BovineHD0100002179	7333147	2	0.45	0.2659	1	0.07727	2.259		1	BovineHD0100002179	2	1	DOM	8/2	119/148	0.04752		1	BovineHD0100002179	2	1	REC	1/9	23/244	0.6023
1	BovineHD0100002183	7354808	2	0.4	0.2243	1	0.09939	2.305		1	BovineHD0100002183	2	1	DOM	7/3	108/155	0.1011		1	BovineHD0100002183	2	1	REC	1/9	10/253	0.3419
1	BovineHD0100002202	7412933	2	0.65	0.4487	1	0.1077	2.282		1	BovineHD0100002202	2	1	DOM	9/1	179/84	0.1806		1	BovineHD0100002202	2	1	REC	4/6	57/206	0.2378
1	BovineHD4100000049	7419499	2	0.2727	0.2509	1	0.8043	1.119		1	BovineHD4100000049	2	1	DOM	5/6	117/152	1		1	BovineHD4100000049	2	1	REC	1/10	18/251	0.5451
1	Hapmap39203-BTA-46163	7424552	2	0.09091	0.04428	1	0.2692	2.158		1	Hapmap39203-BTA-46163	2	1	DOM	2/9	24/247	0.2688		1	Hapmap39203-BTA-46163	2	1	REC	0/11	0/271	1
1	AX-18028228	7429447	2	0.4091	0.3222	1	0.4864	1.456		1	AX-18028228	2	1	DOM	8/3	146/124	0.355		1	AX-18028228	2	1	REC	1/10	28/242	1
1	ARS-BFGL-NGS-96381	7449333	2	0.4	0.4944	1	0.4969	0.6818		1	ARS-BFGL-NGS-96381	2	1	DOM	5/5	199/68	0.1352		1	ARS-BFGL-NGS-96381	2	1	REC	3/7	65/202	0.7112
1	BTA-46228-no-rs	7484829	1	0.3182	0.2122	2	0.2874	1.733		1	BTA-46228-no-rs	1	2	DOM	6/5	99/172	0.3397		1	BTA-46228-no-rs	1	2	REC	1/10	16/255	0.5018
1	BovineHD0100002252	7519177	1	0.3	0.4849	2	0.1156	0.4553		1	BovineHD0100002252	1	2	DOM	5/5	189/76	0.1654		1	BovineHD0100002252	1	2	REC	1/9	68/197	0.4598
1	BovineHD0100002277	7568080	1	0.45	0.4065	2	0.8174	1.195		1	BovineHD0100002277	1	2	DOM	7/3	173/89	1		1	BovineHD0100002277	1	2	REC	2/8	40/222	0.6557
1	BTA-47159-no-rs	7569903	1	0.09091	0.1402	2	0.7544	0.6132		1	BTA-47159-no-rs	1	2	DOM	2/9	74/197	0.7328		1	BTA-47159-no-rs	1	2	REC	0/11	2/269	1
1	BovineHD0100002282	7575218	2	0.35	0.4305	1	0.6462	0.7125		1	BovineHD0100002282	2	1	DOM	6/4	177/89	0.7371		1	BovineHD0100002282	2	1	REC	1/9	52/214	0.6929
1	BTA-16441-no-rs	7616380	2	0.3182	0.2862	1	0.8106	1.164		1	BTA-16441-no-rs	2	1	DOM	6/5	132/137	0.7671		1	BTA-16441-no-rs	2	1	REC	1/10	22/247	1
1	BovineHD0100002347	7788418	1	0.45	0.3859	2	0.642	1.302		1	BovineHD0100002347	1	2	DOM	8/2	171/92	0.502		1	BovineHD0100002347	1	2	REC	1/9	32/231	1
1	ARS-BFGL-NGS-38621	7808598	2	0.4091	0.3063	1	0.3482	1.568		1	ARS-BFGL-NGS-38621	2	1	DOM	8/3	146/125	0.3551		1	ARS-BFGL-NGS-38621	2	1	REC	1/10	20/251	0.5799
1	BovineHD0100002376	7890249	1	0.3636	0.4833	2	0.2867	0.611		1	BovineHD0100002376	1	2	DOM	6/5	197/72	0.1813		1	BovineHD0100002376	1	2	REC	2/9	63/206	1
1	Hapmap44081-BTA-48210	7893442	2	0.04545	0.03506	1	0.555	1.311		1	Hapmap44081-BTA-48210	2	1	DOM	1/10	19/252	0.5615		1	Hapmap44081-BTA-48210	2	1	REC	0/11	0/271	1
1	BovineHD0100002384	7920464	2	0.3636	0.4908	1	0.2811	0.5929		1	BovineHD0100002384	2	1	DOM	6/5	196/75	0.3029		1	BovineHD0100002384	2	1	REC	2/9	70/201	0.7349
1	ARS-BFGL-NGS-114174	7939960	2	0.3636	0.4907	1	0.2811	0.5931		1	ARS-BFGL-NGS-114174	2	1	DOM	6/5	195/74	0.3021		1	ARS-BFGL-NGS-114174	2	1	REC	2/9	69/200	0.7354
1	BovineHD0100002396	7964687	2	0.1818	0.1338	1	0.5225	1.438		1	BovineHD0100002396	2	1	DOM	4/7	69/200	0.4849		1	BovineHD0100002396	2	1	REC	0/11	3/266	1
1	BTA-48234-no-rs	7966238	2	0.09091	0.1089	1	1	0.8186		1	BTA-48234-no-rs	2	1	DOM	2/9	57/214	1		1	BTA-48234-no-rs	2	1	REC	0/11	2/269	1
1	BTA-29644-no-rs	8000850	1	0.3636	0.476	2	0.385	0.629		1	BTA-29644-no-rs	1	2	DOM	7/4	192/79	0.7365		1	BTA-29644-no-rs	1	2	REC	1/10	66/205	0.4685
1	Hapmap48967-BTA-97940	8075890	1	0.5	0.3801	2	0.2706	1.631		1	Hapmap48967-BTA-97940	1	2	DOM	8/3	167/104	0.542		1	Hapmap48967-BTA-97940	1	2	REC	3/8	39/232	0.2151
1	BovineHD0100002423	8100141	1	0.7	0.464	2	0.04205	2.695		1	BovineHD0100002423	1	2	DOM	10/0	184/80	0.03743		1	BovineHD0100002423	1	2	REC	4/6	61/203	0.2548
1	BTB-01493780	8122464	1	0.09091	0.1402	2	0.7544	0.6132		1	BTB-01493780	1	2	DOM	2/9	72/199	0.7335		1	BTB-01493780	1	2	REC	0/11	4/267	1
1	BovineHD0100002437	8161528	2	0.4444	0.2156	1	0.03817	2.91		1	BovineHD0100002437	2	1	DOM	7/2	98/164	0.03014		1	BovineHD0100002437	2	1	REC	1/8	15/247	0.4266
1	BovineHD0100002440	8182783	2	0.3	0.2992	1	1	1.004		1	BovineHD0100002440	2	1	DOM	5/5	125/139	1		1	BovineHD0100002440	2	1	REC	1/9	33/231	1
1	Hapmap48369-BTA-50306	8219111	1	0.2273	0.3321	2	0.3618	0.5915		1	Hapmap48369-BTA-50306	1	2	DOM	5/6	151/120	0.5483		1	Hapmap48369-BTA-50306	1	2	REC	0/11	29/242	0.6111
1	BovineHD0100002449	8226256	2	0.2778	0.383	1	0.4631	0.6196		1	BovineHD0100002449	2	1	DOM	4/5	167/98	0.3034		1	BovineHD0100002449	2	1	REC	1/8	36/229	1
1	BovineHD0100002458	8274037	2	0.45	0.481	1	0.8235	0.8829		1	BovineHD0100002458	2	1	DOM	8/2	198/65	1		1	BovineHD0100002458	2	1	REC	1/9	55/208	0.6927
1	Hapmap41255-BTA-40460	8298027	2	0.5	0.3838	1	0.2747	1.606		1	Hapmap41255-BTA-40460	2	1	DOM	9/2	168/103	0.2203		1	Hapmap41255-BTA-40460	2	1	REC	2/9	40/231	0.6709
1	BTA-114657-no-rs	8320562	1	0.1818	0.07593	2	0.09028	2.705		1	BTA-114657-no-rs	1	2	DOM	4/7	41/229	0.08072		1	BTA-114657-no-rs	1	2	REC	0/11	0/270	1
1	BovineHD0100002480	8329113	1	0.5	0.3864	2	0.3532	1.588		1	BovineHD0100002480	1	2	DOM	8/2	165/99	0.3328		1	BovineHD0100002480	1	2	REC	2/8	39/225	0.6487
1	ARS-BFGL-NGS-116504	8347260	2	0.4545	0.428	1	0.8289	1.114		1	ARS-BFGL-NGS-116504	2	1	DOM	8/3	185/86	1		1	ARS-BFGL-NGS-116504	2	1	REC	2/9	47/224	1
1	BTA-114662-no-rs	8374638	2	0.1818	0.1978	1	1	0.9015		1	BTA-114662-no-rs	2	1	DOM	4/7	98/170	1		1	BTA-114662-no-rs	2	1	REC	0/11	8/260	1
1	ARS-BFGL-NGS-105113	8534534	1	0.5909	0.4907	2	0.3911	1.499		1	ARS-BFGL-NGS-105113	1	2	DOM	9/2	205/65	1		1	ARS-BFGL-NGS-105113	1	2	REC	4/7	60/210	0.279
1	BovineHD0100002528	8548471	1	0.3	0.2547	2	0.6096	1.254		1	BovineHD0100002528	1	2	DOM	5/5	116/151	0.7519		1	BovineHD0100002528	1	2	REC	1/9	20/247	0.5516
1	BovineHD0100002539	8607680	1	0.3	0.3845	2	0.4925	0.6861		1	BovineHD0100002539	1	2	DOM	5/5	168/96	0.5062		1	BovineHD0100002539	1	2	REC	1/9	35/229	1
1	ARS-BFGL-NGS-44292	8645661	2	0.3636	0.369	1	1	0.9771		1	ARS-BFGL-NGS-44292	2	1	DOM	7/4	160/111	1		1	ARS-BFGL-NGS-44292	2	1	REC	1/10	40/231	1
1	BovineHD0100002563	8685545	2	0.3333	0.3938	1	0.8068	0.7696		1	BovineHD0100002563	2	1	DOM	5/4	166/93	0.7269		1	BovineHD0100002563	2	1	REC	1/8	38/221	1
1	BovineHD0100002572	8717011	1	0.4545	0.417	2	0.8264	1.165		1	BovineHD0100002572	1	2	DOM	8/3	180/91	0.7568		1	BovineHD0100002572	1	2	REC	2/9	46/225	1
1	Hapmap42827-BTA-116887	8738949	2	0.5909	0.4704	1	0.2846	1.626		1	Hapmap42827-BTA-116887	2	1	DOM	9/2	200/70	0.7347		1	Hapmap42827-BTA-116887	2	1	REC	4/7	54/216	0.2463
1	BovineHD0100002584	8752633	2	0.3636	0.2989	1	0.4877	1.34		1	BovineHD0100002584	2	1	DOM	7/4	141/130	0.5464		1	BovineHD0100002584	2	1	REC	1/10	21/250	0.5976
1	BTA-116886-no-rs	8760078	2	0.04545	0.05351	1	1	0.8424		1	BTA-116886-no-rs	2	1	DOM	1/10	29/242	1		1	BTA-116886-no-rs	2	1	REC	0/11	0/271	1
1	BovineHD0100002591	8781288	1	0.4	0.3506	2	0.6406	1.235		1	BovineHD0100002591	1	2	DOM	7/3	153/108	0.5337		1	BovineHD0100002591	1	2	REC	1/9	30/231	1
1	ARS-BFGL-NGS-109383	8808124	1	0.09091	0.02963	2	0.1533	3.275		1	ARS-BFGL-NGS-109383	1	2	DOM	2/9	16/254	0.1512		1	ARS-BFGL-NGS-109383	1	2	REC	0/11	0/270	1
1	BovineHD0100002599	8813992	1	0.3	0.4125	2	0.362	0.6103		1	BovineHD0100002599	1	2	DOM	6/4	175/88	0.7371		1	BovineHD0100002599	1	2	REC	0/10	42/221	0.3692
1	Hapmap54753-rs29013987	8831407	1	0.6818	0.4188	2	0.02575	2.974		1	Hapmap54753-rs29013987	1	2	DOM	10/1	186/85	0.1817		1	Hapmap54753-rs29013987	1	2	REC	5/6	41/230	0.0201
1	BovineHD0100002609	8850299	2	0.25	0.4349	1	0.1124	0.433		1	BovineHD0100002609	2	1	DOM	4/6	185/84	0.08136		1	BovineHD0100002609	2	1	REC	1/9	49/220	1
1	BovineHD0100002622	8908159	2	0.4444	0.2197	1	0.04031	2.841		1	BovineHD0100002622	2	1	DOM	7/2	104/160	0.03389		1	BovineHD0100002622	2	1	REC	1/8	12/252	0.3597
1	ARS-BFGL-NGS-119108	8937196	1	0.3182	0.1439	2	0.03464	2.776		1	ARS-BFGL-NGS-119108	1	2	DOM	6/5	73/198	0.07906		1	ARS-BFGL-NGS-119108	1	2	REC	1/10	5/266	0.2141
1	BovineHD0100002644	8993587	1	0.3636	0.2741	2	0.3417	1.514		1	BovineHD0100002644	1	2	DOM	7/4	132/138	0.3738		1	BovineHD0100002644	1	2	REC	1/10	16/254	0.5031
1	ARS-BFGL-BAC-27364	9069741	2	0.09091	0.1833	1	0.3973	0.4455		1	ARS-BFGL-BAC-27364	2	1	DOM	2/9	92/178	0.3457		1	ARS-BFGL-BAC-27364	2	1	REC	0/11	7/263	1
1	BTA-120428-no-rs	9151571	1	0.3636	0.4225	2	0.6635	0.781		1	BTA-120428-no-rs	1	2	DOM	7/4	178/93	1		1	BTA-120428-no-rs	1	2	REC	1/10	51/220	0.6954
1	BovineHD0100002683	9178105	1	0.2222	0.3078	2	0.6046	0.6424		1	BovineHD0100002683	1	2	DOM	4/5	139/129	0.743		1	BovineHD0100002683	1	2	REC	0/9	26/242	1
1	Hapmap49483-BTA-120432	9259731	2	0.09091	0.1716	1	0.5585	0.4828		1	Hapmap49483-BTA-120432	2	1	DOM	2/9	87/184	0.5115		1	Hapmap49483-BTA-120432	2	1	REC	0/11	6/265	1
1	BovineHD0100002710	9260615	1	0.1364	0.3315	2	0.06343	0.3184		1	BovineHD0100002710	1	2	DOM	3/8	150/120	0.1189		1	BovineHD0100002710	1	2	REC	0/11	29/241	0.6113
1	BovineHD0100002717	9285546	2	0.4	0.2091	1	0.05262	2.521		1	BovineHD0100002717	2	1	DOM	5/5	102/161	0.5204		1	BovineHD0100002717	2	1	REC	3/7	8/255	0.005041
1	BovineHD0100002727	9313530	2	0.05556	0.05534	1	1	1.004		1	BovineHD0100002727	2	1	DOM	1/8	29/233	1		1	BovineHD0100002727	2	1	REC	0/9	0/262	1
1	BovineHD0100002735	9339352	2	0.2222	0.2094	1	1	1.079		1	BovineHD0100002735	2	1	DOM	4/5	101/164	0.736		1	BovineHD0100002735	2	1	REC	0/9	10/255	1
1	BovineHD0100002758	9438066	2	0.1667	0.2936	1	0.3002	0.4813		1	BovineHD0100002758	2	1	DOM	3/6	137/127	0.3248		1	BovineHD0100002758	2	1	REC	0/9	18/246	1
1	Hapmap59566-rs29024165	9467212	2	0.09091	0.1236	1	1	0.709		1	Hapmap59566-rs29024165	2	1	DOM	2/9	65/206	1		1	Hapmap59566-rs29024165	2	1	REC	0/11	2/269	1
1	BTA-120430-no-rs	9523532	2	0.5909	0.4926	1	0.3926	1.488		1	BTA-120430-no-rs	2	1	DOM	11/0	202/68	0.07132		1	BTA-120430-no-rs	2	1	REC	2/9	64/206	1
1	Hapmap58026-ss46526282	9592005	2	0.4545	0.3985	1	0.6596	1.258		1	Hapmap58026-ss46526282	2	1	DOM	7/4	178/93	1		1	Hapmap58026-ss46526282	2	1	REC	3/8	38/233	0.2043
1	ARS-BFGL-NGS-118398	9646618	2	0.4091	0.4207	1	1	0.9534		1	ARS-BFGL-NGS-118398	2	1	DOM	6/5	183/88	0.5136		1	ARS-BFGL-NGS-118398	2	1	REC	3/8	45/226	0.4061
1	BovineHD0100002828	9666125	2	0.3333	0.4291	1	0.4758	0.6652		1	BovineHD0100002828	2	1	DOM	5/4	174/87	0.491		1	BovineHD0100002828	2	1	REC	1/8	50/211	1
1	BovineHD0100002836	9708099	2	0.3889	0.4275	1	0.8126	0.8523		1	BovineHD0100002836	2	1	DOM	5/4	174/88	0.4939		1	BovineHD0100002836	2	1	REC	2/7	50/212	0.6843
1	ARS-BFGL-NGS-14644	9741307	1	0.1364	0.1402	2	1	0.9681		1	ARS-BFGL-NGS-14644	1	2	DOM	3/8	72/199	1		1	ARS-BFGL-NGS-14644	1	2	REC	0/11	4/267	1
1	BovineHD0100002867	9830721	1	0.6111	0.4253	2	0.1473	2.124		1	BovineHD0100002867	1	2	DOM	8/1	176/85	0.2798		1	BovineHD0100002867	1	2	REC	3/6	46/215	0.2115
1	BovineHD0100002870	9843069	1	0.5556	0.2934	2	0.03266	3.01		1	BovineHD0100002870	1	2	DOM	7/2	131/128	0.1741		1	BovineHD0100002870	1	2	REC	3/6	21/238	0.03716
1	BovineHD0100002895	9929401	2	0.5	0.4106	1	0.4906	1.435		1	BovineHD0100002895	2	1	DOM	7/3	176/87	1		1	BovineHD0100002895	2	1	REC	3/7	40/223	0.1967
1	BovineHD0100002920	10015824	2	0.3636	0.3722	1	1	0.9638		1	BovineHD0100002920	2	1	DOM	7/4	168/102	1		1	BovineHD0100002920	2	1	REC	1/10	33/237	1
1	BTA-38496-no-rs	10029104	1	0.5	0.4354	2	0.6622	1.297		1	BTA-38496-no-rs	1	2	DOM	8/3	188/83	1		1	BTA-38496-no-rs	1	2	REC	3/8	48/223	0.4247
1	BovineHD0100002947	10061095	2	0.45	0.3697	1	0.4861	1.395		1	BovineHD0100002947	2	1	DOM	6/4	158/103	1		1	BovineHD0100002947	2	1	REC	3/7	35/226	0.1516
1	BovineHD0100002950	10083802	2	0.45	0.3645	1	0.4819	1.426		1	BovineHD0100002950	2	1	DOM	6/4	155/107	1		1	BovineHD0100002950	2	1	REC	3/7	36/226	0.1595
1	ARS-BFGL-NGS-113570	10225421	1	0.2727	0.1218	2	0.04917	2.705		1	ARS-BFGL-NGS-113570	1	2	DOM	6/5	64/207	0.0304		1	ARS-BFGL-NGS-113570	1	2	REC	0/11	2/269	1
1	Hapmap54975-rs29019203	10261207	1	0.5	0.4945	2	1	1.022		1	Hapmap54975-rs29019203	1	2	DOM	9/2	203/68	1		1	Hapmap54975-rs29019203	1	2	REC	2/9	65/206	1
1	BovineHD0100003065	10325849	2	0.3	0.233	1	0.5904	1.411		1	BovineHD0100003065	2	1	DOM	6/4	111/153	0.3338		1	BovineHD0100003065	2	1	REC	0/10	12/252	1
1	BovineHD0100003089	10376109	2	0.3	0.2888	1	1	1.056		1	BovineHD0100003089	2	1	DOM	6/4	127/131	0.5387		1	BovineHD0100003089	2	1	REC	0/10	22/236	1
1	Hapmap49138-BTA-37549	10391180	2	0.2727	0.1513	1	0.1337	2.104		1	Hapmap49138-BTA-37549	2	1	DOM	6/5	71/200	0.07584		1	Hapmap49138-BTA-37549	2	1	REC	0/11	11/260	1
1	Hapmap38504-BTA-51402	10421991	1	0.1818	0.1593	2	0.7668	1.173		1	Hapmap38504-BTA-51402	1	2	DOM	4/7	80/190	0.7381		1	Hapmap38504-BTA-51402	1	2	REC	0/11	6/264	1
1	BovineHD0100003129	10442426	2	0	0.05263	1	0.6158	0		1	BovineHD0100003129	2	1	DOM	0/10	28/238	0.6055		1	BovineHD0100003129	2	1	REC	0/10	0/266	1
1	UA-IFASA-5979	10475147	2	0.4091	0.3875	1	0.8272	1.095		1	UA-IFASA-5979	2	1	DOM	8/3	168/103	0.5441		1	UA-IFASA-5979	2	1	REC	1/10	42/229	1
1	BovineHD0100003147	10482008	2	0.05	0.07171	1	1	0.6814		1	BovineHD0100003147	2	1	DOM	1/9	35/223	1		1	BovineHD0100003147	2	1	REC	0/10	2/256	1
1	BovineHD0100003154	10501157	2	0.3	0.4129	1	0.3618	0.6094		1	BovineHD0100003154	2	1	DOM	6/4	182/82	0.511		1	BovineHD0100003154	2	1	REC	0/10	36/228	0.3687
1	AX-18039968	10512329	2	0.4091	0.3222	1	0.4864	1.456		1	AX-18039968	2	1	DOM	7/4	152/118	0.7614		1	AX-18039968	2	1	REC	2/9	22/248	0.2396
1	BovineHD0100003161	10518325	1	0.4545	0.4074	2	0.6645	1.212		1	BovineHD0100003161	1	2	DOM	7/4	184/86	0.749		1	BovineHD0100003161	1	2	REC	3/8	36/234	0.1847
1	ARS-BFGL-NGS-548	10523098	2	0.2727	0.3056	1	0.818	0.8523		1	ARS-BFGL-NGS-548	2	1	DOM	5/6	146/124	0.7595		1	ARS-BFGL-NGS-548	2	1	REC	1/10	19/251	0.5629
1	ARS-BFGL-NGS-43310	10563465	1	0.5	0.4742	2	0.8311	1.109		1	ARS-BFGL-NGS-43310	1	2	DOM	8/3	202/69	1		1	ARS-BFGL-NGS-43310	1	2	REC	3/8	55/216	0.702
1	ARS-BFGL-NGS-1296	10565732	1	0.1364	0.2103	2	0.5921	0.5928		1	ARS-BFGL-NGS-1296	1	2	DOM	3/8	103/168	0.5441		1	ARS-BFGL-NGS-1296	1	2	REC	0/11	11/260	1
1	Hapmap38887-BTA-22281	10605227	2	0.1364	0.2185	1	0.4395	0.5647		1	Hapmap38887-BTA-22281	2	1	DOM	3/8	108/162	0.5355		1	Hapmap38887-BTA-22281	2	1	REC	0/11	10/260	1
1	BovineHD0100003225	10647953	1	0.05	0.1525	2	0.3361	0.2925		1	BovineHD0100003225	1	2	DOM	1/9	74/185	0.2921		1	BovineHD0100003225	1	2	REC	0/10	5/254	1
1	Hapmap57724-rs29022825	10679165	1	0.5455	0.4391	2	0.3837	1.533		1	Hapmap57724-rs29022825	1	2	DOM	8/3	188/83	1		1	Hapmap57724-rs29022825	1	2	REC	4/7	50/221	0.2307
1	Hapmap44892-BTA-50337	10724714	1	0.4545	0.3451	2	0.3615	1.581		1	Hapmap44892-BTA-50337	1	2	DOM	9/2	154/114	0.1293		1	Hapmap44892-BTA-50337	1	2	REC	1/10	31/237	1
1	BTA-50328-no-rs	10747495	1	0.5	0.4796	2	1	1.085		1	BTA-50328-no-rs	1	2	DOM	10/1	202/68	0.3041		1	BTA-50328-no-rs	1	2	REC	1/10	57/213	0.4698
1	ARS-BFGL-NGS-108684	10771543	1	0.5	0.3271	2	0.1075	2.057		1	ARS-BFGL-NGS-108684	1	2	DOM	9/2	153/116	0.1262		1	ARS-BFGL-NGS-108684	1	2	REC	2/9	23/246	0.2562
1	Hapmap51183-BTA-19351	10793076	2	0.2727	0.4096	1	0.2685	0.5405		1	Hapmap51183-BTA-19351	2	1	DOM	5/6	179/92	0.1989		1	Hapmap51183-BTA-19351	2	1	REC	1/10	43/228	1
1	BovineHD0100003282	10809430	2	0.2222	0.2729	1	0.7908	0.7612		1	BovineHD0100003282	2	1	DOM	4/5	127/135	1		1	BovineHD0100003282	2	1	REC	0/9	16/246	1
1	BovineHD0100003285	10826689	1	0.2778	0.3555	2	0.62	0.6972		1	BovineHD0100003285	1	2	DOM	4/5	159/104	0.4912		1	BovineHD0100003285	1	2	REC	1/8	28/235	1
1	BovineHD0100003303	10887298	2	0.5	0.4457	1	0.8104	1.244		1	BovineHD0100003303	2	1	DOM	6/3	192/75	0.7155		1	BovineHD0100003303	2	1	REC	3/6	46/221	0.2017
1	BovineHD0100003313	10954721	1	0.3333	0.3523	2	1	0.9194		1	BovineHD0100003313	1	2	DOM	6/3	155/109	0.7412		1	BovineHD0100003313	1	2	REC	0/9	31/233	0.6039
1	Hapmap51416-BTA-19350	10960816	2	0	0.01107	1	1	0		1	Hapmap51416-BTA-19350	2	1	DOM	0/11	6/265	1		1	Hapmap51416-BTA-19350	2	1	REC	0/11	0/271	1
1	ARS-BFGL-NGS-113751	11092797	1	0.1364	0.1989	2	0.5928	0.636		1	ARS-BFGL-NGS-113751	1	2	DOM	3/8	100/169	0.7514		1	ARS-BFGL-NGS-113751	1	2	REC	0/11	7/262	1
1	BovineHD0100003385	11208321	2	0.05	0.1078	1	0.7109	0.4356		1	BovineHD0100003385	2	1	DOM	1/9	52/217	0.6933		1	BovineHD0100003385	2	1	REC	0/10	6/263	1
1	BovineHD0100003390	11227266	1	0	0.0539	2	0.6163	0		1	BovineHD0100003390	1	2	DOM	0/10	29/240	0.6061		1	BovineHD0100003390	1	2	REC	0/10	0/269	1
1	BTA-122626-no-rs	11267601	1	0	0.01845	2	1	0		1	BTA-122626-no-rs	1	2	DOM	0/11	10/261	1		1	BTA-122626-no-rs	1	2	REC	0/11	0/271	1
1	BovineHD0100003407	11296054	2	0.2	0.2171	1	1	0.9018		1	BovineHD0100003407	2	1	DOM	4/6	101/157	1		1	BovineHD0100003407	2	1	REC	0/10	11/247	1
1	BovineHD0100003409	11304599	2	0.15	0.1858	1	1	0.7732		1	BovineHD0100003409	2	1	DOM	3/7	91/170	1		1	BovineHD0100003409	2	1	REC	0/10	6/255	1
1	BovineHD0200037433	11315803	2	0.25	0.1402	1	0.1887	2.045		1	BovineHD0200037433	2	1	DOM	5/5	68/196	0.1372		1	BovineHD0200037433	2	1	REC	0/10	6/258	1
1	Hapmap60823-rs29019235	11341018	2	0	0.01845	1	1	0		1	Hapmap60823-rs29019235	2	1	DOM	0/11	10/261	1		1	Hapmap60823-rs29019235	2	1	REC	0/11	0/271	1
1	ARS-BFGL-NGS-36767	11400789	2	0.4091	0.3893	1	0.8279	1.086		1	ARS-BFGL-NGS-36767	2	1	DOM	6/5	176/95	0.5277		1	ARS-BFGL-NGS-36767	2	1	REC	3/8	35/236	0.1731
1	BovineHD0100003437	11462748	1	0.5909	0.4797	2	0.3854	1.567		1	BovineHD0100003437	1	2	DOM	8/3	205/66	0.7335		1	BovineHD0100003437	1	2	REC	5/6	55/216	0.05998
1	Hapmap40304-BTA-17131	11472285	1	0.4091	0.2768	2	0.2248	1.809		1	Hapmap40304-BTA-17131	1	2	DOM	6/5	135/136	1		1	Hapmap40304-BTA-17131	1	2	REC	3/8	15/256	0.0262
1	BovineHD0100003453	11509566	2	0.4545	0.47	1	1	0.9396		1	BovineHD0100003453	2	1	DOM	7/4	197/70	0.4906		1	BovineHD0100003453	2	1	REC	3/8	54/213	0.7016
1	BovineHD0100003459	11541372	1	0.5	0.4736	2	0.8309	1.112		1	BovineHD0100003459	1	2	DOM	8/3	192/73	1		1	BovineHD0100003459	1	2	REC	3/8	59/206	0.7146
1	Hapmap38737-BTA-22640	11647870	2	0	0.03889	1	1	0		1	Hapmap38737-BTA-22640	2	1	DOM	0/11	21/249	1		1	Hapmap38737-BTA-22640	2	1	REC	0/11	0/270	1
1	BovineHD0100003487	11671029	1	0.1818	0.2143	2	1	0.8148		1	BovineHD0100003487	1	2	DOM	4/7	105/161	1		1	BovineHD0100003487	1	2	REC	0/11	9/257	1
1	BovineHD0100003501	11735568	2	0.1364	0.1528	1	1	0.8752		1	BovineHD0100003501	2	1	DOM	3/8	76/189	1		1	BovineHD0100003501	2	1	REC	0/11	5/260	1
1	Hapmap54322-rs29009637	11776956	2	0.3182	0.1993	1	0.1804	1.875		1	Hapmap54322-rs29009637	2	1	DOM	7/4	95/176	0.1045		1	Hapmap54322-rs29009637	2	1	REC	0/11	13/258	1
1	BovineHD0100003524	11818525	2	0.4545	0.4814	1	0.8314	0.8977		1	BovineHD0100003524	2	1	DOM	8/3	198/71	1		1	BovineHD0100003524	2	1	REC	2/9	61/208	1
1	Hapmap43814-BTA-22629	11840829	2	0.1364	0.2066	1	0.5916	0.6062		1	Hapmap43814-BTA-22629	2	1	DOM	2/9	101/170	0.3381		1	Hapmap43814-BTA-22629	2	1	REC	1/10	11/260	0.3857
1	BovineHD0100003573	11956821	1	0.3182	0.4023	2	0.5096	0.6935		1	BovineHD0100003573	1	2	DOM	5/6	178/88	0.1924		1	BovineHD0100003573	1	2	REC	2/9	36/230	0.6514
1	Hapmap55642-rs29027263	11993667	2	0.4545	0.3856	1	0.5124	1.328		1	Hapmap55642-rs29027263	2	1	DOM	7/4	176/95	1		1	Hapmap55642-rs29027263	2	1	REC	3/8	33/238	0.1532
1	BovineHD0100003588	12049311	1	0.4091	0.5	2	0.5152	0.6923		1	BovineHD0100003588	1	2	DOM	7/4	205/63	0.3027		1	BovineHD0100003588	1	2	REC	2/9	63/205	1
1	BovineHD0100003597	12069543	1	0.3636	0.3849	2	1	0.9132		1	BovineHD0100003597	1	2	DOM	5/6	166/99	0.3426		1	BovineHD0100003597	1	2	REC	3/8	38/227	0.2139
1	BovineHD0100003627	12200034	2	0.5	0.4815	1	1	1.077		1	BovineHD0100003627	2	1	DOM	7/4	200/71	0.4905		1	BovineHD0100003627	2	1	REC	4/7	61/210	0.284
1	BovineHD0100003636	12239641	1	0.09091	0.07722	2	0.6856	1.195		1	BovineHD0100003636	1	2	DOM	2/9	38/221	0.6695		1	BovineHD0100003636	1	2	REC	0/11	2/257	1
1	ARS-BFGL-NGS-115663	12354879	1	0.1364	0.04259	2	0.07536	3.549		1	ARS-BFGL-NGS-115663	1	2	DOM	3/8	22/248	0.06376		1	ARS-BFGL-NGS-115663	1	2	REC	0/11	1/269	1
1	BovineHD0100003683	12383178	2	0.3182	0.186	1	0.1609	2.042		1	BovineHD0100003683	2	1	DOM	5/6	90/168	0.5262		1	BovineHD0100003683	2	1	REC	2/9	6/252	0.03728
1	BovineHD0100003686	12393568	2	0.2727	0.468	1	0.0827	0.4262		1	BovineHD0100003686	2	1	DOM	6/5	193/73	0.3017		1	BovineHD0100003686	2	1	REC	0/11	56/210	0.1281
1	BTA-54331-no-rs	12430421	2	0.1818	0.07993	1	0.1036	2.558		1	BTA-54331-no-rs	2	1	DOM	4/7	42/227	0.08742		1	BTA-54331-no-rs	2	1	REC	0/11	1/268	1
1	Hapmap43879-BTA-54328	12455251	2	0.09091	0.1463	1	0.7558	0.5835		1	Hapmap43879-BTA-54328	2	1	DOM	2/9	75/195	0.7328		1	Hapmap43879-BTA-54328	2	1	REC	0/11	4/266	1
1	Hapmap55464-rs29015665	12475971	2	0.4545	0.4907	1	0.8293	0.8648		1	Hapmap55464-rs29015665	2	1	DOM	7/4	203/67	0.4777		1	Hapmap55464-rs29015665	2	1	REC	3/8	62/208	0.7204
1	BTA-54318-no-rs	12497912	1	0.3182	0.3395	2	1	0.908		1	BTA-54318-no-rs	1	2	DOM	5/6	153/118	0.5435		1	BTA-54318-no-rs	1	2	REC	2/9	31/240	0.6238
1	BovineHD0100003734	12569498	2	0.4545	0.3914	1	0.6571	1.296		1	BovineHD0100003734	2	1	DOM	8/3	167/100	0.7515		1	BovineHD0100003734	2	1	REC	2/9	42/225	0.6875
1	BovineHD0100003761	12691827	1	0.2273	0.3214	2	0.4844	0.6209		1	BovineHD0100003761	1	2	DOM	5/6	146/120	0.5546		1	BovineHD0100003761	1	2	REC	0/11	25/241	0.6066
1	BovineHD0100003770	12732497	2	0.2273	0.3494	1	0.3596	0.5476		1	BovineHD0100003770	2	1	DOM	5/6	157/112	0.5355		1	BovineHD0100003770	2	1	REC	0/11	31/238	0.6173
1	BTB-00005611	12803538	2	0.09091	0.2915	1	0.05112	0.243		1	BTB-00005611	2	1	DOM	2/9	137/134	0.0606		1	BTB-00005611	2	1	REC	0/11	21/250	1
1	BovineHD0100003819	12940114	2	0.2273	0.2566	1	1	0.8521		1	BovineHD0100003819	2	1	DOM	4/7	123/142	0.5553		1	BovineHD0100003819	2	1	REC	1/10	13/252	0.4421
1	Hapmap60346-rs29019231	12988191	1	0.3636	0.3653	2	1	0.9928		1	Hapmap60346-rs29019231	1	2	DOM	7/4	167/104	1		1	Hapmap60346-rs29019231	1	2	REC	1/10	31/240	1
1	BovineHD0100003869	13110312	2	0.09091	0.2926	1	0.05113	0.2418		1	BovineHD0100003869	2	1	DOM	2/9	136/134	0.06074		1	BovineHD0100003869	2	1	REC	0/11	22/248	1
1	Hapmap38791-BTA-89194	13177821	2	0	0.07963	1	0.4002	0		1	Hapmap38791-BTA-89194	2	1	DOM	0/11	43/227	0.2251		1	Hapmap38791-BTA-89194	2	1	REC	0/11	0/270	1
1	BovineHD0100003917	13253220	1	0.09091	0.1887	2	0.3986	0.43		1	BovineHD0100003917	1	2	DOM	2/9	94/171	0.3394		1	BovineHD0100003917	1	2	REC	0/11	6/259	1
1	ARS-BFGL-BAC-11044	13395358	1	0.1364	0.2638	2	0.2214	0.4406		1	ARS-BFGL-BAC-11044	1	2	DOM	3/8	127/144	0.2333		1	ARS-BFGL-BAC-11044	1	2	REC	0/11	16/255	1
1	BovineHD4100000092	13527122	1	0.3182	0.2715	2	0.6293	1.252		1	BovineHD4100000092	1	2	DOM	5/6	127/140	1		1	BovineHD4100000092	1	2	REC	2/9	18/249	0.1829
1	ARS-BFGL-BAC-685	13575805	1	0	0.08148	2	0.404	0		1	ARS-BFGL-BAC-685	1	2	DOM	0/11	44/226	0.2232		1	ARS-BFGL-BAC-685	1	2	REC	0/11	0/270	1
1	BovineHD0100004029	13601105	2	0.3182	0.3547	1	0.8226	0.8492		1	BovineHD0100004029	2	1	DOM	5/6	156/102	0.3576		1	BovineHD0100004029	2	1	REC	2/9	27/231	0.3365
1	BovineHD0100004039	13643769	1	0.2727	0.334	2	0.6487	0.7479		1	BovineHD0100004039	1	2	DOM	4/7	150/115	0.2234		1	BovineHD0100004039	1	2	REC	2/9	27/238	0.3246
1	Hapmap24222-BTA-88936	13665306	2	0.2727	0.4151	1	0.2684	0.5283		1	Hapmap24222-BTA-88936	2	1	DOM	6/5	178/93	0.5225		1	Hapmap24222-BTA-88936	2	1	REC	0/11	47/224	0.2207
1	BovineHD0100004053	13702454	2	0.4091	0.468	1	0.666	0.7868		1	BovineHD0100004053	2	1	DOM	7/4	196/70	0.4917		1	BovineHD0100004053	2	1	REC	2/9	53/213	1
1	ARS-BFGL-NGS-21333	13877483	2	0.1364	0.1278	1	0.7534	1.078		1	ARS-BFGL-NGS-21333	2	1	DOM	2/9	66/204	1		1	ARS-BFGL-NGS-21333	2	1	REC	1/10	3/267	0.1484
1	BovineHD0100004106	13914324	1	0.5	0.3926	2	0.3752	1.547		1	BovineHD0100004106	1	2	DOM	8/3	178/92	0.7551		1	BovineHD0100004106	1	2	REC	3/8	34/236	0.1643
1	BovineHD0100004109	13925424	2	0.5909	0.485	1	0.3875	1.534		1	BovineHD0100004109	2	1	DOM	9/2	205/62	1		1	BovineHD0100004109	2	1	REC	4/7	54/213	0.2491
1	BovineHD0100004147	14064963	2	0.4091	0.3321	1	0.4921	1.392		1	BovineHD0100004147	2	1	DOM	7/4	150/115	0.762		1	BovineHD0100004147	2	1	REC	2/9	26/239	0.3089
1	BovineHD0100004161	14122474	1	0.4091	0.2895	2	0.2376	1.699		1	BovineHD0100004161	1	2	DOM	7/4	134/132	0.5412		1	BovineHD0100004161	1	2	REC	2/9	20/246	0.2141
1	BovineHD0100004179	14218125	2	0.3636	0.417	1	0.6658	0.799		1	BovineHD0100004179	2	1	DOM	7/4	182/89	0.7555		1	BovineHD0100004179	2	1	REC	1/10	44/227	1
1	BovineHD0100004186	14235061	1	0.5	0.3289	2	0.1089	2.04		1	BovineHD0100004186	1	2	DOM	8/3	154/109	0.5336		1	BovineHD0100004186	1	2	REC	3/8	19/244	0.04871
1	BovineHD0100004251	14380075	1	0.3636	0.1455	2	0.01167	3.355		1	BovineHD0100004251	1	2	DOM	8/3	74/194	0.003106		1	BovineHD0100004251	1	2	REC	0/11	4/264	1
1	BovineHD0100004290	14505711	1	0.04545	0.1161	2	0.4955	0.3625		1	BovineHD0100004290	1	2	DOM	1/10	57/210	0.4686		1	BovineHD0100004290	1	2	REC	0/11	5/262	1
1	BTA-103292-no-rs	14533366	2	0.2727	0.08333	1	0.009996	4.125		1	BTA-103292-no-rs	2	1	DOM	6/5	45/225	0.006036		1	BTA-103292-no-rs	2	1	REC	0/11	0/270	1
1	ARS-BFGL-NGS-26402	14579710	2	0.04545	0.09963	1	0.7126	0.4303		1	ARS-BFGL-NGS-26402	2	1	DOM	1/10	52/219	0.6959		1	ARS-BFGL-NGS-26402	2	1	REC	0/11	2/269	1
1	Hapmap24335-BTA-127763	14616735	1	0.4545	0.4797	2	0.8319	0.9038		1	Hapmap24335-BTA-127763	1	2	DOM	7/4	201/70	0.4867		1	Hapmap24335-BTA-127763	1	2	REC	3/8	59/212	0.711
1	ARS-BFGL-BAC-14883	14655035	1	0.1364	0.1882	2	0.7803	0.6811		1	ARS-BFGL-BAC-14883	1	2	DOM	3/8	94/177	0.7535		1	ARS-BFGL-BAC-14883	1	2	REC	0/11	8/263	1
1	BovineHD0100004342	14735286	1	0.3182	0.4663	2	0.1957	0.5341		1	BovineHD0100004342	1	2	DOM	7/4	192/75	0.5137		1	BovineHD0100004342	1	2	REC	0/11	57/210	0.1278
1	BovineHD0100004343	14740618	1	0.2727	0.3365	2	0.6481	0.7395		1	BovineHD0100004343	1	2	DOM	6/5	145/121	1		1	BovineHD0100004343	1	2	REC	0/11	34/232	0.3701
1	BovineHD0100004359	14783511	2	0.3182	0.3365	1	1	0.9203		1	BovineHD0100004359	2	1	DOM	5/6	149/117	0.5462		1	BovineHD0100004359	2	1	REC	2/9	30/236	0.3697
1	BovineHD0100004373	14824048	2	0.1364	0.0653	1	0.1831	2.26		1	BovineHD0100004373	2	1	DOM	3/8	35/233	0.1772		1	BovineHD0100004373	2	1	REC	0/11	0/268	1
1	BovineHD0100004398	14880156	2	0.5455	0.417	1	0.273	1.678		1	BovineHD0100004398	2	1	DOM	9/2	177/88	0.5125		1	BovineHD0100004398	2	1	REC	3/8	44/221	0.406
1	BovineHD0100004435	15009567	1	0.3636	0.2672	2	0.3313	1.567		1	BovineHD0100004435	1	2	DOM	8/3	117/145	0.1189		1	BovineHD0100004435	1	2	REC	0/11	23/239	0.6072
1	ARS-BFGL-NGS-107530	15017291	1	0.2273	0.2362	2	1	0.9513		1	ARS-BFGL-NGS-107530	1	2	DOM	5/6	115/156	1		1	ARS-BFGL-NGS-107530	1	2	REC	0/11	13/258	1
1	BTB-01807638	15049490	2	0.1364	0.1944	1	0.7818	0.6541		1	BTB-01807638	2	1	DOM	3/8	95/175	0.7525		1	BTB-01807638	2	1	REC	0/11	10/260	1
1	BTA-28028-no-rs	15092475	1	0.04545	0.09515	2	0.7108	0.4528		1	BTA-28028-no-rs	1	2	DOM	1/10	47/221	0.6961		1	BTA-28028-no-rs	1	2	REC	0/11	4/264	1
1	BTB-00502293	15126234	1	0.3636	0.2066	2	0.1061	2.194		1	BTB-00502293	1	2	DOM	8/3	101/170	0.02541		1	BTB-00502293	1	2	REC	0/11	11/260	1
1	BTA-97382-no-rs	15241004	1	0.4091	0.3635	2	0.6577	1.212		1	BTA-97382-no-rs	1	2	DOM	7/4	168/103	1		1	BTA-97382-no-rs	1	2	REC	2/9	29/242	0.3456
1	BovineHD0100004528	15381892	1	0.4545	0.3759	2	0.5042	1.383		1	BovineHD0100004528	1	2	DOM	9/2	163/103	0.2159		1	BovineHD0100004528	1	2	REC	1/10	37/229	1
1	BovineHD0100004540	15430091	2	0.3636	0.3649	1	1	0.9947		1	BovineHD0100004540	2	1	DOM	7/4	156/103	1		1	BovineHD0100004540	2	1	REC	1/10	33/226	1
1	Hapmap50227-BTA-113868	15440999	2	0.1818	0.3192	1	0.2415	0.474		1	Hapmap50227-BTA-113868	2	1	DOM	4/7	146/125	0.3575		1	Hapmap50227-BTA-113868	2	1	REC	0/11	27/244	0.6077
1	BovineHD0100004550	15464786	1	0.4545	0.3596	2	0.3731	1.484		1	BovineHD0100004550	1	2	DOM	7/4	166/101	1		1	BovineHD0100004550	1	2	REC	3/8	26/241	0.09501
1	BovineHD0100004579	15508545	1	0.2273	0.1842	2	0.5797	1.303		1	BovineHD0100004579	1	2	DOM	5/6	86/180	0.3494		1	BovineHD0100004579	1	2	REC	0/11	12/254	1
1	BovineHD0100004592	15557674	2	0.3182	0.4004	1	0.5104	0.6989		1	BovineHD0100004592	2	1	DOM	5/6	174/92	0.2046		1	BovineHD0100004592	2	1	REC	2/9	39/227	0.6693
1	BovineHD4100000100	15577736	2	0.1818	0.2738	1	0.4644	0.5895		1	BovineHD4100000100	2	1	DOM	4/7	125/138	0.5484		1	BovineHD4100000100	2	1	REC	0/11	19/244	1
1	ARS-BFGL-NGS-102441	15592825	2	0.3182	0.2177	1	0.2942	1.677		1	ARS-BFGL-NGS-102441	2	1	DOM	5/6	110/161	0.7628		1	ARS-BFGL-NGS-102441	2	1	REC	2/9	8/263	0.05253
1	ARS-BFGL-BAC-13008	15612315	2	0.2727	0.2232	1	0.6038	1.305		1	ARS-BFGL-BAC-13008	2	1	DOM	6/5	111/160	0.5343		1	ARS-BFGL-BAC-13008	2	1	REC	0/11	10/261	1
1	BTA-113886-no-rs	15643337	2	0.4545	0.5	1	0.8284	0.8333		1	BTA-113886-no-rs	2	1	DOM	7/4	202/68	0.4807		1	BTA-113886-no-rs	2	1	REC	3/8	68/202	1
1	BTA-113888-no-rs	15669879	2	0.2727	0.1685	1	0.2442	1.85		1	BTA-113888-no-rs	2	1	DOM	5/6	87/183	0.3479		1	BTA-113888-no-rs	2	1	REC	1/10	4/266	0.1822
1	BovineHD0100004654	15699132	1	0.04545	0.03053	2	0.5083	1.512		1	BovineHD0100004654	1	2	DOM	1/10	16/246	0.5137		1	BovineHD0100004654	1	2	REC	0/11	0/262	1
1	BovineHD0100004673	15757230	1	0	0.1245	2	0.09409	0		1	BovineHD0100004673	1	2	DOM	0/11	65/200	0.07232		1	BovineHD0100004673	1	2	REC	0/11	1/264	1
1	BovineHD0100004686	15816006	1	0.04545	0.07331	2	1	0.602		1	BovineHD0100004686	1	2	DOM	1/10	39/227	1		1	BovineHD0100004686	1	2	REC	0/11	0/266	1
1	BovineHD0100004731	16007329	1	0.1818	0.218	2	0.7979	0.7969		1	BovineHD0100004731	1	2	DOM	4/7	103/163	1		1	BovineHD0100004731	1	2	REC	0/11	13/253	1
1	Hapmap58809-rs29017514	16044068	2	0.2727	0.1771	1	0.2594	1.742		1	Hapmap58809-rs29017514	2	1	DOM	5/6	92/179	0.5202		1	Hapmap58809-rs29017514	2	1	REC	1/10	4/267	0.1816
1	BTB-01193581	16114873	2	0.3182	0.345	1	1	0.8859		1	BTB-01193581	2	1	DOM	7/4	151/120	0.7604		1	BTB-01193581	2	1	REC	0/11	36/235	0.3694
1	BTB-00569345	16155668	1	0.2727	0.2435	2	0.8006	1.165		1	BTB-00569345	1	2	DOM	6/5	110/161	0.3683		1	BTB-00569345	1	2	REC	0/11	22/249	1
1	ARS-BFGL-NGS-95377	16186991	2	0.4091	0.3796	1	0.8245	1.131		1	ARS-BFGL-NGS-95377	2	1	DOM	7/4	171/99	1		1	ARS-BFGL-NGS-95377	2	1	REC	2/9	34/236	0.6379
1	BTB-01193494	16265007	1	0.4091	0.2985	2	0.3427	1.627		1	BTB-01193494	1	2	DOM	7/4	142/126	0.5514		1	BTB-01193494	1	2	REC	2/9	18/250	0.1818
1	ARS-BFGL-NGS-109692	16306198	1	0	0.08148	2	0.404	0		1	ARS-BFGL-NGS-109692	1	2	DOM	0/11	43/227	0.2251		1	ARS-BFGL-NGS-109692	1	2	REC	0/11	1/269	1
1	BovineHD0100004829	16330432	2	0.1364	0.2113	1	0.5922	0.5893		1	BovineHD0100004829	2	1	DOM	3/8	99/166	0.7514		1	BovineHD0100004829	2	1	REC	0/11	13/252	1
1	BovineHD0100004833	16355046	2	0.5455	0.4676	1	0.5183	1.367		1	BovineHD0100004833	2	1	DOM	9/2	190/72	0.7326		1	BovineHD0100004833	2	1	REC	3/8	55/207	0.7057
1	Hapmap41782-BTA-16216	16362952	2	0.09091	0.1667	1	0.5557	0.5		1	Hapmap41782-BTA-16216	2	1	DOM	2/9	87/183	0.5114		1	Hapmap41782-BTA-16216	2	1	REC	0/11	3/267	1
1	BTB-01999110	16403017	2	0.4091	0.3926	1	1	1.071		1	BTB-01999110	2	1	DOM	7/4	174/96	1		1	BTB-01999110	2	1	REC	2/9	38/232	0.6598
1	ARS-BFGL-NGS-32422	16447333	1	0.5455	0.4944	2	0.6696	1.227		1	ARS-BFGL-NGS-32422	1	2	DOM	8/3	205/65	0.7307		1	ARS-BFGL-NGS-32422	1	2	REC	4/7	62/208	0.2923
1	BovineHD0100004898	16579388	2	0.4091	0.3571	1	0.6534	1.246		1	BovineHD0100004898	2	1	DOM	7/4	158/108	1		1	BovineHD0100004898	2	1	REC	2/9	32/234	0.6306
1	BTA-110801-no-rs	16604159	2	0.3182	0.3229	1	1	0.9787		1	BTA-110801-no-rs	2	1	DOM	7/4	146/125	0.7592		1	BTA-110801-no-rs	2	1	REC	0/11	29/242	0.6111
1	BovineHD0100004919	16643923	1	0.1818	0.2356	2	0.797	0.7209		1	BovineHD0100004919	1	2	DOM	4/7	113/148	0.7622		1	BovineHD0100004919	1	2	REC	0/11	10/251	1
1	BovineHD0100004926	16666424	1	0.1818	0.2433	2	0.6182	0.6912		1	BovineHD0100004926	1	2	DOM	4/7	117/144	0.7595		1	BovineHD0100004926	1	2	REC	0/11	10/251	1
1	BTB-01919348	16705237	1	0.04545	0.06089	2	1	0.7345		1	BTB-01919348	1	2	DOM	1/10	33/238	1		1	BTB-01919348	1	2	REC	0/11	0/271	1
1	BTB-01084253	16754495	2	0.1818	0.09594	1	0.2608	2.094		1	BTB-01084253	2	1	DOM	4/7	51/220	0.2338		1	BTB-01084253	2	1	REC	0/11	1/270	1
1	ARS-BFGL-NGS-41853	16844981	2	0.1364	0.2103	1	0.5921	0.5928		1	ARS-BFGL-NGS-41853	2	1	DOM	3/8	102/169	0.7518		1	ARS-BFGL-NGS-41853	2	1	REC	0/11	12/259	1
1	BovineHD0100004973	16859361	2	0.4545	0.4539	1	1	1.003		1	BovineHD0100004973	2	1	DOM	7/4	194/77	0.5183		1	BovineHD0100004973	2	1	REC	3/8	52/219	0.4534
1	BovineHD0100004984	16929334	2	0	0.09963	1	0.2543	0		1	BovineHD0100004984	2	1	DOM	0/11	52/219	0.2257		1	BovineHD0100004984	2	1	REC	0/11	2/269	1
1	BTB-01083987	16967412	1	0.4091	0.4151	2	1	0.9754		1	BTB-01083987	1	2	DOM	7/4	179/92	1		1	BTB-01083987	1	2	REC	2/9	46/225	1
1	Hapmap51162-BTA-118728	16993213	2	0.5909	0.4908	1	0.3912	1.499		1	Hapmap51162-BTA-118728	2	1	DOM	8/3	203/68	1		1	Hapmap51162-BTA-118728	2	1	REC	5/6	63/208	0.1417
1	ARS-BFGL-NGS-22727	17041419	1	0.4091	0.3579	2	0.6539	1.242		1	ARS-BFGL-NGS-22727	1	2	DOM	7/4	162/109	1		1	ARS-BFGL-NGS-22727	1	2	REC	2/9	32/239	0.628
1	BTB-01872049	17105670	1	0.09091	0.2085	2	0.2785	0.3796		1	BTB-01872049	1	2	DOM	2/9	107/164	0.2125		1	BTB-01872049	1	2	REC	0/11	6/265	1
1	BovineHD0100005059	17170037	2	0.2273	0.3276	1	0.4853	0.6037		1	BovineHD0100005059	2	1	DOM	5/6	151/110	0.5369		1	BovineHD0100005059	2	1	REC	0/11	20/241	1
1	BTA-118719-no-rs	17192788	2	0.2273	0.329	1	0.3636	0.5999		1	BTA-118719-no-rs	2	1	DOM	5/6	156/113	0.5366		1	BTA-118719-no-rs	2	1	REC	0/11	21/248	1
1	Hapmap60239-rs29019581	17235751	2	0.2273	0.2823	1	0.8088	0.7478		1	Hapmap60239-rs29019581	2	1	DOM	5/6	136/135	1		1	Hapmap60239-rs29019581	2	1	REC	0/11	17/254	1
1	Hapmap39625-BTA-118605	17263605	2	0.3182	0.2528	1	0.4632	1.379		1	Hapmap39625-BTA-118605	2	1	DOM	7/4	122/147	0.3556		1	Hapmap39625-BTA-118605	2	1	REC	0/11	14/255	1
1	BTB-00757818	17350471	1	0.4091	0.3654	2	0.6591	1.202		1	BTB-00757818	1	2	DOM	7/4	161/99	1		1	BTB-00757818	1	2	REC	2/9	29/231	0.3649
1	BovineHD0100005100	17410539	1	0.5455	0.3628	2	0.1129	2.108		1	BovineHD0100005100	1	2	DOM	8/3	166/100	0.7516		1	BovineHD0100005100	1	2	REC	4/7	27/239	0.02433
1	BTB-00757888	17441499	1	0.5	0.4133	2	0.5093	1.42		1	BTB-00757888	1	2	DOM	8/3	184/87	1		1	BTB-00757888	1	2	REC	3/8	40/231	0.3824
1	ARS-BFGL-NGS-51809	17481344	1	0.5455	0.4291	2	0.3804	1.597		1	ARS-BFGL-NGS-51809	1	2	DOM	9/2	183/85	0.5116		1	ARS-BFGL-NGS-51809	1	2	REC	3/8	47/221	0.4216
1	BTA-118731-no-rs	17513897	1	0.4091	0.5	2	0.5153	0.6923		1	BTA-118731-no-rs	1	2	DOM	6/5	208/63	0.1417		1	BTA-118731-no-rs	1	2	REC	3/8	63/208	0.7229
1	BovineHD0100005160	17549923	2	0.4545	0.4234	1	0.8275	1.135		1	BovineHD0100005160	2	1	DOM	7/4	173/88	1		1	BovineHD0100005160	2	1	REC	3/8	48/213	0.4374
1	BovineHD0100005187	17604891	2	0.2273	0.2746	1	0.808	0.7769		1	BovineHD0100005187	2	1	DOM	5/6	126/138	1		1	BovineHD0100005187	2	1	REC	0/11	19/245	1
1	BovineHD0100005191	17630258	2	0.1818	0.1553	1	0.7633	1.209		1	BovineHD0100005191	2	1	DOM	4/7	73/191	0.5078		1	BovineHD0100005191	2	1	REC	0/11	9/255	1
1	Hapmap54349-rs29011587	17672335	2	0.1364	0.0572	1	0.1404	2.603		1	Hapmap54349-rs29011587	2	1	DOM	3/8	30/241	0.1253		1	Hapmap54349-rs29011587	2	1	REC	0/11	1/270	1
1	Hapmap48613-BTA-112066	17806576	2	0.09091	0.125	1	1	0.7		1	Hapmap48613-BTA-112066	2	1	DOM	2/9	64/204	1		1	Hapmap48613-BTA-112066	2	1	REC	0/11	3/265	1
1	BTA-20344-no-rs	17839302	2	0.1818	0.07196	1	0.07799	2.866		1	BTA-20344-no-rs	2	1	DOM	4/7	38/233	0.06408		1	BTA-20344-no-rs	2	1	REC	0/11	1/270	1
1	BovineHD0100005238	17886413	1	0.2727	0.3314	2	0.6495	0.7564		1	BovineHD0100005238	1	2	DOM	6/5	150/114	1		1	BovineHD0100005238	1	2	REC	0/11	25/239	0.6066
1	ARS-BFGL-NGS-112632	17933659	1	0.4091	0.4502	2	0.828	0.8455		1	ARS-BFGL-NGS-112632	1	2	DOM	7/4	191/80	0.7377		1	ARS-BFGL-NGS-112632	1	2	REC	2/9	53/218	1
1	BTB-00005987	17957377	1	0.4091	0.2712	2	0.2215	1.86		1	BTB-00005987	1	2	DOM	9/2	128/143	0.03084		1	BTB-00005987	1	2	REC	0/11	19/252	1
1	Hapmap44269-BTA-67047	18013704	1	0.3182	0.316	2	1	1.01		1	Hapmap44269-BTA-67047	1	2	DOM	7/4	145/124	0.7592		1	Hapmap44269-BTA-67047	1	2	REC	0/11	25/244	0.6066
1	BovineHD0100005323	18165726	1	0.5909	0.4808	2	0.3855	1.56		1	BovineHD0100005323	1	2	DOM	11/0	197/64	0.07228		1	BovineHD0100005323	1	2	REC	2/9	54/207	1
1	BovineHD0100005338	18249935	2	0.4091	0.4944	1	0.5165	0.7081		1	BovineHD0100005338	2	1	DOM	9/2	197/69	0.7346		1	BovineHD0100005338	2	1	REC	0/11	66/200	0.07178
1	ARS-BFGL-NGS-26632	18299875	1	0.3182	0.2915	2	0.8125	1.134		1	ARS-BFGL-NGS-26632	1	2	DOM	7/4	135/136	0.5407		1	ARS-BFGL-NGS-26632	1	2	REC	0/11	23/248	0.6085
1	BovineHD0100005358	18336197	1	0.1818	0.1353	2	0.5255	1.42		1	BovineHD0100005358	1	2	DOM	4/7	61/205	0.2918		1	BovineHD0100005358	1	2	REC	0/11	11/255	1
1	BovineHD0100005377	18360408	1	0.1818	0.2167	2	1	0.8031		1	BovineHD0100005377	1	2	DOM	4/7	107/156	1		1	BovineHD0100005377	1	2	REC	0/11	7/256	1
1	BTB-00006408	18378081	1	0.2273	0.2201	2	1	1.042		1	BTB-00006408	1	2	DOM	5/6	110/158	0.765		1	BTB-00006408	1	2	REC	0/11	8/260	1
1	Hapmap28603-BTA-123758	18439746	1	0	0.01107	2	1	0		1	Hapmap28603-BTA-123758	1	2	DOM	0/11	6/265	1		1	Hapmap28603-BTA-123758	1	2	REC	0/11	0/271	1
1	BovineHD0100005444	18544855	2	0.1818	0.3008	1	0.3401	0.5167		1	BovineHD0100005444	2	1	DOM	4/7	136/130	0.3736		1	BovineHD0100005444	2	1	REC	0/11	24/242	0.6068
1	BTB-01511695	18608496	2	0.1364	0.3315	1	0.06343	0.3184		1	BTB-01511695	2	1	DOM	3/8	155/115	0.06349		1	BTB-01511695	2	1	REC	0/11	24/246	0.6071
1	BTB-01511764	18640129	1	0.5455	0.4114	2	0.2703	1.717		1	BTB-01511764	1	2	DOM	8/3	181/90	1		1	BTB-01511764	1	2	REC	4/7	42/229	0.08553
1	BTB-01931918	18679090	2	0.4545	0.4686	1	1	0.9449		1	BTB-01931918	2	1	DOM	7/4	199/72	0.4945		1	BTB-01931918	2	1	REC	3/8	55/216	0.702
1	Hapmap50395-BTA-57301	18735528	2	0.1818	0.2944	1	0.3401	0.5325		1	Hapmap50395-BTA-57301	2	1	DOM	4/7	136/134	0.5406		1	Hapmap50395-BTA-57301	2	1	REC	0/11	23/247	0.6083
1	BTA-06080-no-rs	18758458	2	0.3182	0.2974	1	0.8151	1.102		1	BTA-06080-no-rs	2	1	DOM	6/5	137/132	1		1	BTA-06080-no-rs	2	1	REC	1/10	23/246	1
1	BovineHD0100005509	18764873	1	0.3182	0.4591	2	0.2745	0.5498		1	BovineHD0100005509	1	2	DOM	6/5	199/70	0.171		1	BovineHD0100005509	1	2	REC	1/10	48/221	0.6956
1	Hapmap33466-BTA-107178	18789066	1	0.2727	0.1586	2	0.15	1.99		1	Hapmap33466-BTA-107178	1	2	DOM	4/7	80/188	0.7389		1	Hapmap33466-BTA-107178	1	2	REC	2/9	5/263	0.02669
1	BovineHD0100005518	18826962	2	0.04545	0.1386	1	0.3392	0.296		1	BovineHD0100005518	2	1	DOM	1/10	70/197	0.2996		1	BovineHD0100005518	2	1	REC	0/11	4/263	1
1	BovineHD0100005525	18866155	2	0.2727	0.3962	1	0.274	0.5714		1	BovineHD0100005525	2	1	DOM	6/5	178/87	0.5147		1	BovineHD0100005525	2	1	REC	0/11	32/233	0.6225
1	BovineHD0100005531	18918611	1	0.1364	0.2085	2	0.5918	0.5994		1	BovineHD0100005531	1	2	DOM	3/8	97/174	0.7517		1	BovineHD0100005531	1	2	REC	0/11	16/255	1
1	BTB-01890165	18976190	1	0.04545	0.01107	2	0.2442	4.254		1	BTB-01890165	1	2	DOM	1/10	6/265	0.2454		1	BTB-01890165	1	2	REC	0/11	0/271	1
1	BTB-01342789	19016808	1	0.2273	0.3593	2	0.2586	0.5246		1	BTB-01342789	1	2	DOM	5/6	162/108	0.3621		1	BTB-01342789	1	2	REC	0/11	32/238	0.6204
1	ARS-BFGL-NGS-1797	19040936	1	0.1364	0.1919	2	0.781	0.665		1	ARS-BFGL-NGS-1797	1	2	DOM	3/8	90/181	1		1	ARS-BFGL-NGS-1797	1	2	REC	0/11	14/257	1
1	Hapmap47551-BTA-25902	19086376	2	0.1364	0.2852	1	0.151	0.3958		1	Hapmap47551-BTA-25902	2	1	DOM	3/8	135/135	0.2181		1	Hapmap47551-BTA-25902	2	1	REC	0/11	19/251	1
1	BTA-120923-no-rs	19161658	2	0.2727	0.2732	1	1	0.9974		1	BTA-120923-no-rs	2	1	DOM	6/5	135/134	1		1	BTA-120923-no-rs	2	1	REC	0/11	12/257	1
1	BTA-26174-no-rs	19232342	2	0.1364	0.2907	1	0.1493	0.3852		1	BTA-26174-no-rs	2	1	DOM	3/8	137/133	0.2173		1	BTA-26174-no-rs	2	1	REC	0/11	20/250	1
1	ARS-BFGL-NGS-111605	19266922	1	0.6364	0.4465	2	0.08529	2.169		1	ARS-BFGL-NGS-111605	1	2	DOM	10/1	184/87	0.1817		1	ARS-BFGL-NGS-111605	1	2	REC	4/7	58/213	0.2656
1	ARS-BFGL-NGS-94650	19417856	2	0.3182	0.1778	1	0.1534	2.158		1	ARS-BFGL-NGS-94650	2	1	DOM	6/5	93/177	0.2033		1	ARS-BFGL-NGS-94650	2	1	REC	1/10	3/267	0.1484
1	BovineHD0100005653	19448177	1	0.3636	0.4943	2	0.279	0.5845		1	BovineHD0100005653	1	2	DOM	8/3	207/58	0.7118		1	BovineHD0100005653	1	2	REC	0/11	55/210	0.1286
1	ARS-BFGL-NGS-7429	19455564	1	0.4091	0.3783	2	0.8241	1.138		1	ARS-BFGL-NGS-7429	1	2	DOM	7/4	167/100	1		1	ARS-BFGL-NGS-7429	1	2	REC	2/9	35/232	0.6451
1	BTA-39405-no-rs	19485982	1	0.3182	0.1922	2	0.1689	1.962		1	BTA-39405-no-rs	1	2	DOM	6/5	98/170	0.3397		1	BTA-39405-no-rs	1	2	REC	1/10	5/263	0.2162
1	BovineHD0100005688	19507076	2	0.5	0.3629	1	0.2584	1.755		1	BovineHD0100005688	2	1	DOM	9/2	163/96	0.3375		1	BovineHD0100005688	2	1	REC	2/9	25/234	0.3026
1	BovineHD0100005700	19560010	1	0.4091	0.4045	2	1	1.019		1	BovineHD0100005700	1	2	DOM	8/3	173/94	0.7524		1	BovineHD0100005700	1	2	REC	1/10	43/224	1
1	BovineHD0100005713	19629594	1	0.2727	0.3421	2	0.6474	0.7212		1	BovineHD0100005713	1	2	DOM	6/5	157/109	0.7647		1	BovineHD0100005713	1	2	REC	0/11	25/241	0.6066
1	ARS-BFGL-NGS-29732	19691110	1	0.4091	0.4889	2	0.519	0.7237		1	ARS-BFGL-NGS-29732	1	2	DOM	7/4	201/70	0.4867		1	ARS-BFGL-NGS-29732	1	2	REC	2/9	64/207	1
1	BovineHD0100005771	19903346	1	0.1818	0.2996	2	0.34	0.5194		1	BovineHD0100005771	1	2	DOM	3/8	137/130	0.1359		1	BovineHD0100005771	1	2	REC	1/10	23/244	1
1	BovineHD0100005782	19928368	2	0.3182	0.4655	1	0.1961	0.5358		1	BovineHD0100005782	2	1	DOM	6/5	187/74	0.3066		1	BovineHD0100005782	2	1	REC	1/10	56/205	0.4679
1	Hapmap38278-BTA-104803	19938721	2	0	0.01661	1	1	0		1	Hapmap38278-BTA-104803	2	1	DOM	0/11	9/262	1		1	Hapmap38278-BTA-104803	2	1	REC	0/11	0/271	1
1	BovineHD0100005789	19957793	1	0.4091	0.412	2	1	0.9881		1	BovineHD0100005789	1	2	DOM	7/4	176/91	1		1	BovineHD0100005789	1	2	REC	2/9	44/223	1
1	BovineHD0100005800	20008856	1	0.3182	0.2816	2	0.8093	1.19		1	BovineHD0100005800	1	2	DOM	6/5	133/128	1		1	BovineHD0100005800	1	2	REC	1/10	14/247	0.4707
1	BovineHD0100005805	20026148	2	0.3636	0.3893	1	1	0.8964		1	BovineHD0100005805	2	1	DOM	8/3	182/89	1		1	BovineHD0100005805	2	1	REC	0/11	29/242	0.6111
1	BovineHD0100005816	20073891	1	0.3182	0.2973	2	0.815	1.103		1	BovineHD0100005816	1	2	DOM	6/5	140/124	1		1	BovineHD0100005816	1	2	REC	1/10	17/247	0.5319
1	BTA-119061-no-rs	20099965	1	0.1818	0.0738	2	0.08357	2.789		1	BTA-119061-no-rs	1	2	DOM	3/8	40/231	0.3824		1	BTA-119061-no-rs	1	2	REC	1/10	0/271	0.03901
1	UA-IFASA-3994	20175310	1	0.1364	0.2204	2	0.4385	0.5586		1	UA-IFASA-3994	1	2	DOM	3/8	109/161	0.5347		1	UA-IFASA-3994	1	2	REC	0/11	10/260	1
1	BovineHD0100005852	20214044	2	0.1364	0.2256	1	0.4368	0.5421		1	BovineHD0100005852	2	1	DOM	3/8	109/157	0.5338		1	BovineHD0100005852	2	1	REC	0/11	11/255	1
1	ARS-BFGL-BAC-11750	20285787	2	0.3182	0.2878	1	0.8111	1.155		1	ARS-BFGL-BAC-11750	2	1	DOM	6/5	141/130	1		1	ARS-BFGL-BAC-11750	2	1	REC	1/10	15/256	0.4803
1	Hapmap51222-BTA-39456	20312624	1	0.4091	0.4907	2	0.518	0.7185		1	Hapmap51222-BTA-39456	1	2	DOM	8/3	200/69	1		1	Hapmap51222-BTA-39456	1	2	REC	1/10	64/205	0.4666
1	BovineHD0100005901	20320335	2	0	0.1307	1	0.09474	0		1	BovineHD0100005901	2	1	DOM	0/11	68/196	0.07084		1	BovineHD0100005901	2	1	REC	0/11	1/263	1
1	ARS-BFGL-NGS-34218	20336514	2	0.3636	0.4	1	0.8264	0.8571		1	ARS-BFGL-NGS-34218	2	1	DOM	6/5	175/90	0.5201		1	ARS-BFGL-NGS-34218	2	1	REC	2/9	37/228	0.658
1	Hapmap51978-BTA-39455	20362107	1	0.2273	0.3007	2	0.6351	0.6839		1	Hapmap51978-BTA-39455	1	2	DOM	5/6	142/129	0.7624		1	Hapmap51978-BTA-39455	1	2	REC	0/11	21/250	1
1	BovineHD0100005920	20416935	1	0.3636	0.4034	2	0.8259	0.8451		1	BovineHD0100005920	1	2	DOM	6/5	170/94	0.5322		1	BovineHD0100005920	1	2	REC	2/9	43/221	0.6973
1	BovineHD0100005928	20440130	2	0.5	0.476	1	0.8317	1.101		1	BovineHD0100005928	2	1	DOM	7/4	191/80	0.7377		1	BovineHD0100005928	2	1	REC	4/7	67/204	0.477
1	BovineHD0100005950	20541415	2	0.3182	0.3665	1	0.8218	0.8065		1	BovineHD0100005950	2	1	DOM	6/5	156/110	0.7666		1	BovineHD0100005950	2	1	REC	1/10	39/227	1
1	BovineHD0100005959	20566611	2	0.3182	0.4747	1	0.1914	0.5164		1	BovineHD0100005959	2	1	DOM	7/4	192/65	0.4815		1	BovineHD0100005959	2	1	REC	0/11	52/205	0.1299
1	ARS-BFGL-NGS-116430	20588929	2	0.2273	0.2926	1	0.6353	0.7111		1	ARS-BFGL-NGS-116430	2	1	DOM	4/7	143/127	0.3612		1	ARS-BFGL-NGS-116430	2	1	REC	1/10	15/255	0.4816
1	BovineHD0100005970	20601715	2	0.04545	0.1154	1	0.4951	0.3651		1	BovineHD0100005970	2	1	DOM	1/10	59/201	0.4651		1	BovineHD0100005970	2	1	REC	0/11	1/259	1
1	BovineHD0100005989	20653453	2	0.4545	0.4682	1	1	0.9467		1	BovineHD0100005989	2	1	DOM	7/4	197/70	0.4906		1	BovineHD0100005989	2	1	REC	3/8	53/214	0.4674
1	Hapmap49594-BTA-39447	20667934	2	0.04545	0.1421	1	0.341	0.2876		1	Hapmap49594-BTA-39447	2	1	DOM	1/10	75/196	0.2985		1	Hapmap49594-BTA-39447	2	1	REC	0/11	2/269	1
1	ARS-BFGL-BAC-15578	20694788	2	0.04545	0.02214	1	0.4072	2.103		1	ARS-BFGL-BAC-15578	2	1	DOM	1/10	12/259	0.4107		1	ARS-BFGL-BAC-15578	2	1	REC	0/11	0/271	1
1	ARS-BFGL-NGS-10334	20716311	1	0.4091	0.4389	2	0.8299	0.8851		1	ARS-BFGL-NGS-10334	1	2	DOM	7/4	192/78	0.7357		1	ARS-BFGL-NGS-10334	1	2	REC	2/9	45/225	1
1	BovineHD0100006007	20731028	1	0.4545	0.3853	2	0.512	1.329		1	BovineHD0100006007	1	2	DOM	7/4	174/92	1		1	BovineHD0100006007	1	2	REC	3/8	31/235	0.14
1	BovineHD0100006010	20744177	2	0.2727	0.3726	1	0.3779	0.6315		1	BovineHD0100006010	2	1	DOM	6/5	165/94	0.5385		1	BovineHD0100006010	2	1	REC	0/11	28/231	0.6114
1	BovineHD0100006021	20780052	1	0.1364	0.2804	2	0.2207	0.4051		1	BovineHD0100006021	1	2	DOM	3/8	136/135	0.2178		1	BovineHD0100006021	1	2	REC	0/11	16/255	1
1	BTA-39438-no-rs	20799206	2	0.1364	0.203	1	0.5918	0.6201		1	BTA-39438-no-rs	2	1	DOM	3/8	104/167	0.542		1	BTA-39438-no-rs	2	1	REC	0/11	6/265	1
1	Hapmap28298-BTA-123775	20845227	2	0.5455	0.4813	1	0.6648	1.293		1	Hapmap28298-BTA-123775	2	1	DOM	10/1	203/65	0.468		1	Hapmap28298-BTA-123775	2	1	REC	2/9	55/213	1
1	Hapmap28872-BTA-162555	20921794	2	0.1364	0.2638	1	0.2214	0.4406		1	Hapmap28872-BTA-162555	2	1	DOM	3/8	130/141	0.2258		1	Hapmap28872-BTA-162555	2	1	REC	0/11	13/258	1
1	BTA-116769-no-rs	20960607	2	0.5909	0.4123	1	0.1225	2.059		1	BTA-116769-no-rs	2	1	DOM	9/2	180/88	0.5119		1	BTA-116769-no-rs	2	1	REC	4/7	41/227	0.08252
1	Hapmap52794-rs29023743	21005976	2	0.2727	0.2889	1	1	0.9231		1	Hapmap52794-rs29023743	2	1	DOM	5/6	141/129	0.7629		1	Hapmap52794-rs29023743	2	1	REC	1/10	15/255	0.4816
1	BovineHD0100006078	21055167	1	0.3182	0.3102	2	1	1.038		1	BovineHD0100006078	1	2	DOM	6/5	143/123	1		1	BovineHD0100006078	1	2	REC	1/10	22/244	1
1	Hapmap54489-rs29018413	21096522	2	0.1364	0.1956	1	0.7822	0.6495		1	Hapmap54489-rs29018413	2	1	DOM	3/8	101/170	0.7515		1	Hapmap54489-rs29018413	2	1	REC	0/11	5/266	1
1	Hapmap60044-rs29010295	21136787	2	0.3182	0.3542	1	0.8229	0.8507		1	Hapmap60044-rs29010295	2	1	DOM	6/5	164/107	0.7581		1	Hapmap60044-rs29010295	2	1	REC	1/10	28/243	1
1	Hapmap26189-BTA-157760	21178292	2	0.1818	0.1089	1	0.2932	1.819		1	Hapmap26189-BTA-157760	2	1	DOM	3/8	58/213	0.7084		1	Hapmap26189-BTA-157760	2	1	REC	1/10	1/270	0.07663
1	ARS-BFGL-NGS-68915	21199202	1	0.3636	0.2934	2	0.4806	1.376		1	ARS-BFGL-NGS-68915	1	2	DOM	7/4	135/136	0.5407		1	ARS-BFGL-NGS-68915	1	2	REC	1/10	24/247	1
1	UA-IFASA-1500	21277546	2	0.3182	0.3598	1	0.8221	0.8304		1	UA-IFASA-1500	2	1	DOM	5/6	163/108	0.3607		1	UA-IFASA-1500	2	1	REC	2/9	32/239	0.628
1	UA-IFASA-9700	21310574	2	0.3636	0.2915	1	0.4785	1.389		1	UA-IFASA-9700	2	1	DOM	7/4	135/136	0.5407		1	UA-IFASA-9700	2	1	REC	1/10	23/248	1
1	Hapmap39987-BTA-25749	21358879	1	0.3636	0.4077	2	0.8257	0.83		1	Hapmap39987-BTA-25749	1	2	DOM	6/5	175/96	0.5307		1	Hapmap39987-BTA-25749	1	2	REC	2/9	46/225	1
1	BovineHD0100006201	21422169	2	0.2273	0.3487	1	0.3595	0.5493		1	BovineHD0100006201	2	1	DOM	5/6	162/109	0.3644		1	BovineHD0100006201	2	1	REC	0/11	27/244	0.6077
1	ARS-BFGL-NGS-41203	21457294	2	0.4545	0.4188	1	0.8267	1.156		1	ARS-BFGL-NGS-41203	2	1	DOM	7/4	181/90	1		1	ARS-BFGL-NGS-41203	2	1	REC	3/8	46/225	0.412
1	Hapmap49929-BTA-24619	21533511	1	0.4545	0.4613	2	1	0.9733		1	Hapmap49929-BTA-24619	1	2	DOM	7/4	198/73	0.4988		1	Hapmap49929-BTA-24619	1	2	REC	3/8	52/219	0.4534
1	BovineHD0100006241	21565267	2	0	0.1222	1	0.09455	0		1	BovineHD0100006241	2	1	DOM	0/11	63/207	0.1312		1	BovineHD0100006241	2	1	REC	0/11	3/267	1
1	BovineHD0100006242	21574750	2	0.4091	0.2528	1	0.1331	2.047		1	BovineHD0100006242	2	1	DOM	7/4	124/147	0.3565		1	BovineHD0100006242	2	1	REC	2/9	13/258	0.11
1	BovineHD0100006253	21599174	2	0.6818	0.4294	1	0.0268	2.848		1	BovineHD0100006253	2	1	DOM	11/0	189/80	0.03737		1	BovineHD0100006253	2	1	REC	4/7	42/227	0.08742
1	ARS-BFGL-NGS-100534	21646634	1	0.4545	0.2952	2	0.1523	1.99		1	ARS-BFGL-NGS-100534	1	2	DOM	8/3	142/129	0.228		1	ARS-BFGL-NGS-100534	1	2	REC	2/9	18/253	0.1787
1	BovineHD0100006280	21662722	1	0.3182	0.4315	2	0.3806	0.6149		1	BovineHD0100006280	1	2	DOM	5/6	187/83	0.1081		1	BovineHD0100006280	1	2	REC	2/9	46/224	1
1	BovineHD0100006290	21691443	1	0.2273	0.3426	2	0.3589	0.5644		1	BovineHD0100006290	1	2	DOM	5/6	155/115	0.5388		1	BovineHD0100006290	1	2	REC	0/11	30/240	0.6139
1	Hapmap53902-rs29027390	21725158	1	0.5909	0.3506	2	0.03867	2.676		1	Hapmap53902-rs29027390	1	2	DOM	9/2	158/113	0.2089		1	Hapmap53902-rs29027390	1	2	REC	4/7	32/239	0.03845
1	BovineHD0100006309	21744486	2	0.2273	0.3537	1	0.261	0.5374		1	BovineHD0100006309	2	1	DOM	4/7	161/109	0.2095		1	BovineHD0100006309	2	1	REC	1/10	30/240	1
1	BovineHD0100006311	21750572	1	0	0.1718	2	0.03495	0		1	BovineHD0100006311	1	2	DOM	0/11	81/181	0.03727		1	BovineHD0100006311	1	2	REC	0/11	9/253	1
1	BTB-01332122	21764241	1	0.2273	0.3469	2	0.3592	0.5538		1	BTB-01332122	1	2	DOM	4/7	158/113	0.2135		1	BTB-01332122	1	2	REC	1/10	30/241	1
1	BovineHD0100006326	21792273	1	0.3636	0.3926	2	0.8281	0.8841		1	BovineHD0100006326	1	2	DOM	6/5	170/100	0.7519		1	BovineHD0100006326	1	2	REC	2/9	42/228	0.6845
1	BTB-01210202	21828827	2	0	0.02214	1	1	0		1	BTB-01210202	2	1	DOM	0/11	12/259	1		1	BTB-01210202	2	1	REC	0/11	0/271	1
1	BovineHD0100006343	21849432	2	0.1818	0.4291	1	0.02602	0.2957		1	BovineHD0100006343	2	1	DOM	4/7	176/92	0.05758		1	BovineHD0100006343	2	1	REC	0/11	54/214	0.1305
1	BovineHD0100006365	21909852	2	0.1364	0.1852	1	0.7799	0.6947		1	BovineHD0100006365	2	1	DOM	3/8	89/181	1		1	BovineHD0100006365	2	1	REC	0/11	11/259	1
1	BTB-01210232	21927942	2	0	0.02952	1	1	0		1	BTB-01210232	2	1	DOM	0/11	16/255	1		1	BTB-01210232	2	1	REC	0/11	0/271	1
1	BTB-01116114	22034195	2	0.1818	0.3192	1	0.2415	0.474		1	BTB-01116114	2	1	DOM	3/8	148/123	0.1203		1	BTB-01116114	2	1	REC	1/10	25/246	1
1	BovineHD0100006395	22053575	2	0	0.1352	1	0.09694	0		1	BovineHD0100006395	2	1	DOM	0/11	70/200	0.07094		1	BovineHD0100006395	2	1	REC	0/11	3/267	1
1	BovineHD0100006403	22090208	2	0	0.2199	1	0.006871	0		1	BovineHD0100006403	2	1	DOM	0/11	103/163	0.008109		1	BovineHD0100006403	2	1	REC	0/11	14/252	1
1	BovineHD0100006405	22101301	2	0.2273	0.2041	1	0.7886	1.147		1	BovineHD0100006405	2	1	DOM	3/8	101/166	0.5452		1	BovineHD0100006405	2	1	REC	2/9	8/259	0.05392
1	BovineHD0100006407	22106567	1	0.2273	0.2698	2	0.8083	0.796		1	BovineHD0100006407	1	2	DOM	3/8	127/138	0.2259		1	BovineHD0100006407	1	2	REC	2/9	16/249	0.1557
1	Hapmap42716-BTA-88423	22125251	1	0	0.06827	2	0.3873	0		1	Hapmap42716-BTA-88423	1	2	DOM	0/11	36/235	0.3694		1	Hapmap42716-BTA-88423	1	2	REC	0/11	1/270	1
1	BTB-01897472	22210184	2	0.3636	0.4963	1	0.2784	0.5799		1	BTB-01897472	2	1	DOM	6/5	203/68	0.1595		1	BTB-01897472	2	1	REC	2/9	66/205	1
1	BTA-07140-rs29026807	22267765	2	0	0.05351	1	0.6202	0		1	BTA-07140-rs29026807	2	1	DOM	0/11	29/242	0.6111		1	BTA-07140-rs29026807	2	1	REC	0/11	0/271	1
1	BovineHD0100006446	22274799	1	0	0.06391	2	0.3874	0		1	BovineHD0100006446	1	2	DOM	0/11	34/232	0.3701		1	BovineHD0100006446	1	2	REC	0/11	0/266	1
1	BovineHD0100006466	22338247	2	0.3182	0.4326	1	0.3804	0.6121		1	BovineHD0100006466	2	1	DOM	7/4	191/76	0.5191		1	BovineHD0100006466	2	1	REC	0/11	40/227	0.3747
1	ARS-BFGL-NGS-51361	22359893	2	0.1818	0.2804	1	0.4655	0.5702		1	ARS-BFGL-NGS-51361	2	1	DOM	4/7	131/140	0.5449		1	ARS-BFGL-NGS-51361	2	1	REC	0/11	21/250	1
1	ARS-BFGL-BAC-15637	22421404	2	0	0.1052	1	0.1522	0		1	ARS-BFGL-BAC-15637	2	1	DOM	0/11	56/215	0.129		1	ARS-BFGL-BAC-15637	2	1	REC	0/11	1/270	1
1	BovineHD0100006497	22430817	1	0.1364	0.2755	2	0.2193	0.4153		1	BovineHD0100006497	1	2	DOM	3/8	126/139	0.2283		1	BovineHD0100006497	1	2	REC	0/11	20/245	1
1	UA-IFASA-9053	22459664	2	0.04545	0.1162	1	0.4957	0.3621		1	UA-IFASA-9053	2	1	DOM	1/10	59/212	0.4671		1	UA-IFASA-9053	2	1	REC	0/11	4/267	1
1	BovineHD0100006515	22504689	2	0.1818	0.2753	1	0.4645	0.585		1	BovineHD0100006515	2	1	DOM	4/7	134/133	0.5406		1	BovineHD0100006515	2	1	REC	0/11	13/254	1
1	ARS-BFGL-NGS-117957	22525457	1	0.6364	0.4797	2	0.1921	1.898		1	ARS-BFGL-NGS-117957	1	2	DOM	9/2	201/70	0.7349		1	ARS-BFGL-NGS-117957	1	2	REC	5/6	59/212	0.1325
1	BTB-00010729	22568717	2	0.04545	0.09779	1	0.7117	0.4394		1	BTB-00010729	2	1	DOM	1/10	49/222	0.6954		1	BTB-00010729	2	1	REC	0/11	4/267	1
1	BovineHD0100006555	22591077	1	0.1818	0.3502	2	0.1144	0.4124		1	BovineHD0100006555	1	2	DOM	4/7	161/106	0.1282		1	BovineHD0100006555	1	2	REC	0/11	26/241	0.607
1	BTA-59229-no-rs	22604778	1	0	0.07778	2	0.3969	0		1	BTA-59229-no-rs	1	2	DOM	0/11	39/231	0.3718		1	BTA-59229-no-rs	1	2	REC	0/11	3/267	1
1	BovineHD0100006562	22622795	2	0.3636	0.3875	1	1	0.9034		1	BovineHD0100006562	2	1	DOM	6/5	169/102	0.7529		1	BovineHD0100006562	2	1	REC	2/9	41/230	0.6772
1	BovineHD0100006581	22659683	1	0.3636	0.3764	2	1	0.9468		1	BovineHD0100006581	1	2	DOM	7/4	169/102	1		1	BovineHD0100006581	1	2	REC	1/10	35/236	1
1	ARS-BFGL-NGS-118519	22681024	2	0.3182	0.3782	1	0.6578	0.7672		1	ARS-BFGL-NGS-118519	2	1	DOM	6/5	172/99	0.5411		1	ARS-BFGL-NGS-118519	2	1	REC	1/10	33/238	1
1	BovineHD0100006599	22777886	2	0	0.04815	1	0.6162	0		1	BovineHD0100006599	2	1	DOM	0/11	26/244	0.6069		1	BovineHD0100006599	2	1	REC	0/11	0/270	1
1	BTA-120720-no-rs	22901046	2	0.5	0.4742	1	0.8311	1.109		1	BTA-120720-no-rs	2	1	DOM	8/3	199/72	1		1	BTA-120720-no-rs	2	1	REC	3/8	58/213	0.7084
1	BTB-00011076	23001427	1	0.4545	0.4963	2	0.8287	0.8457		1	BTB-00011076	1	2	DOM	7/4	202/69	0.4832		1	BTB-00011076	1	2	REC	3/8	67/204	1
1	BovineHD0100006669	23080610	2	0.3636	0.2528	1	0.3174	1.689		1	BovineHD0100006669	2	1	DOM	6/5	124/147	0.7594		1	BovineHD0100006669	2	1	REC	2/9	13/258	0.11
1	BTB-02025707	23125028	1	0.5	0.3542	2	0.1781	1.823		1	BTB-02025707	1	2	DOM	8/3	163/108	0.5359		1	BTB-02025707	1	2	REC	3/8	29/242	0.1165
1	BovineHD0100006687	23140537	2	0	0.1364	1	0.09745	0		1	BovineHD0100006687	2	1	DOM	0/11	68/196	0.07084		1	BovineHD0100006687	2	1	REC	0/11	4/260	1
1	BTB-01548042	23214124	1	0.3182	0.2491	2	0.4577	1.407		1	BTB-01548042	1	2	DOM	5/6	123/148	1		1	BTB-01548042	1	2	REC	2/9	12/259	0.09743
1	BTB-01438016	23317578	1	0.04545	0.1511	2	0.228	0.2675		1	BTB-01438016	1	2	DOM	1/10	75/193	0.2989		1	BTB-01438016	1	2	REC	0/11	6/262	1
1	BovineHD0100006735	23335758	1	0.3636	0.3948	2	0.8276	0.8758		1	BovineHD0100006735	1	2	DOM	6/5	175/96	0.5307		1	BovineHD0100006735	1	2	REC	2/9	39/232	0.6649
1	BTB-01562871	23382846	2	0.2273	0.2556	1	1	0.8568		1	BTB-01562871	2	1	DOM	4/7	122/148	0.7594		1	BTB-01562871	2	1	REC	1/10	16/254	0.5031
1	BovineHD0100006749	23404797	2	0.04545	0.1629	1	0.2288	0.2447		1	BovineHD0100006749	2	1	DOM	1/10	80/187	0.1848		1	BovineHD0100006749	2	1	REC	0/11	7/260	1
1	BovineHD0100006765	23451433	2	0.5	0.4135	1	0.5093	1.418		1	BovineHD0100006765	2	1	DOM	7/4	182/84	0.7473		1	BovineHD0100006765	2	1	REC	4/7	38/228	0.06781
1	ARS-BFGL-NGS-97225	23477787	1	0.1818	0.1919	2	1	0.9359		1	ARS-BFGL-NGS-97225	1	2	DOM	4/7	96/175	1		1	ARS-BFGL-NGS-97225	1	2	REC	0/11	8/263	1
1	BovineHD0100006803	23554870	1	0.1364	0.2838	2	0.1515	0.3984		1	BovineHD0100006803	1	2	DOM	3/8	137/129	0.1345		1	BovineHD0100006803	1	2	REC	0/11	14/252	1
1	ARS-BFGL-NGS-29682	23661806	2	0.4545	0.4354	1	1	1.081		1	ARS-BFGL-NGS-29682	2	1	DOM	6/5	186/85	0.3362		1	ARS-BFGL-NGS-29682	2	1	REC	4/7	50/221	0.2307
1	BTB-01153392	23709011	2	0.1818	0.1033	1	0.2776	1.929		1	BTB-01153392	2	1	DOM	4/7	52/219	0.2373		1	BTB-01153392	2	1	REC	0/11	4/267	1
1	BovineHD0100006868	23712951	2	0.3636	0.3308	1	0.8181	1.156		1	BovineHD0100006868	2	1	DOM	5/6	147/119	0.5515		1	BovineHD0100006868	2	1	REC	3/8	29/237	0.1215
1	BTB-01153206	23747154	2	0.3636	0.4114	1	0.8256	0.8174		1	BTB-01153206	2	1	DOM	6/5	176/95	0.5277		1	BTB-01153206	2	1	REC	2/9	47/224	1
1	BovineHD0100006883	23775870	1	0.2273	0.1365	2	0.2159	1.86		1	BovineHD0100006883	1	2	DOM	5/6	68/203	0.1595		1	BovineHD0100006883	1	2	REC	0/11	6/265	1
1	BTB-01153241	23797034	1	0.4545	0.4926	2	0.829	0.8583		1	BTB-01153241	1	2	DOM	6/5	198/73	0.1837		1	BTB-01153241	1	2	REC	4/7	69/202	0.4832
1	Hapmap32844-BTA-151959	23863105	1	0.04545	0.2749	2	0.01319	0.1256		1	Hapmap32844-BTA-151959	1	2	DOM	1/10	132/139	0.01155		1	Hapmap32844-BTA-151959	1	2	REC	0/11	17/254	1
1	BovineHD0100006928	23904271	2	0	0.05283	1	0.6192	0		1	BovineHD0100006928	2	1	DOM	0/11	28/237	0.6101		1	BovineHD0100006928	2	1	REC	0/11	0/265	1
1	BovineHD0100006929	23905003	2	0	0.05283	1	0.6192	0		1	BovineHD0100006929	2	1	DOM	0/11	28/237	0.6101		1	BovineHD0100006929	2	1	REC	0/11	0/265	1
1	BTB-01885509	23916098	1	0.3182	0.3333	2	1	0.9333		1	BTB-01885509	1	2	DOM	6/5	153/117	1		1	BTB-01885509	1	2	REC	1/10	27/243	1
1	BovineHD0100006936	23918911	1	0.4091	0.2528	2	0.1331	2.047		1	BovineHD0100006936	1	2	DOM	8/3	123/148	0.1203		1	BovineHD0100006936	1	2	REC	1/10	14/257	0.458
1	BovineHD0100006920	23943176	2	0.3182	0.3278	1	1	0.9571		1	BovineHD0100006920	2	1	DOM	6/5	149/121	1		1	BovineHD0100006920	2	1	REC	1/10	28/242	1
1	BTB-01821892	23946108	2	0.1818	0.3081	1	0.2446	0.499		1	BTB-01821892	2	1	DOM	4/7	145/126	0.3588		1	BTB-01821892	2	1	REC	0/11	22/249	1
1	BovineHD0100006946	23970626	2	0.1818	0.2823	1	0.4661	0.565		1	BovineHD0100006946	2	1	DOM	4/7	134/137	0.5417		1	BovineHD0100006946	2	1	REC	0/11	19/252	1
1	ARS-BFGL-BAC-16283	23977117	1	0.1364	0.1896	2	0.7805	0.6749		1	ARS-BFGL-BAC-16283	1	2	DOM	3/8	93/176	0.7538		1	ARS-BFGL-BAC-16283	1	2	REC	0/11	9/260	1
1	BTB-00008466	23998494	2	0.1364	0.3414	1	0.06242	0.3046		1	BTB-00008466	2	1	DOM	3/8	151/117	0.06866		1	BTB-00008466	2	1	REC	0/11	32/236	0.6212
1	BovineHD0100006952	24003791	2	0.3182	0.4453	1	0.2784	0.5814		1	BovineHD0100006952	2	1	DOM	5/6	182/83	0.1837		1	BovineHD0100006952	2	1	REC	2/9	54/211	1
1	BovineHD0100006959	24044449	1	0.4545	0.3284	2	0.2503	1.704		1	BovineHD0100006959	1	2	DOM	8/3	148/123	0.3555		1	BovineHD0100006959	1	2	REC	2/9	30/241	0.3609
1	Hapmap60828-rs29019992	24099198	2	0.1818	0.2103	1	1	0.8343		1	Hapmap60828-rs29019992	2	1	DOM	4/7	107/164	1		1	Hapmap60828-rs29019992	2	1	REC	0/11	7/264	1
1	ARS-BFGL-NGS-110541	24136861	2	0.4545	0.4742	1	1	0.9241		1	ARS-BFGL-NGS-110541	2	1	DOM	8/3	198/73	1		1	ARS-BFGL-NGS-110541	2	1	REC	2/9	59/212	1
1	ARS-BFGL-BAC-6737	24168476	2	0.04545	0.2944	1	0.007584	0.1141		1	ARS-BFGL-BAC-6737	2	1	DOM	1/10	136/134	0.01048		1	ARS-BFGL-BAC-6737	2	1	REC	0/11	23/247	0.6083
1	BovineHD0100006989	24193638	2	0.09091	0.1556	1	0.5549	0.5429		1	BovineHD0100006989	2	1	DOM	2/9	81/189	0.5163		1	BovineHD0100006989	2	1	REC	0/11	3/267	1
1	BTA-49259-no-rs	24222791	2	0.3182	0.2085	1	0.2839	1.772		1	BTA-49259-no-rs	2	1	DOM	6/5	104/167	0.3486		1	BTA-49259-no-rs	2	1	REC	1/10	9/262	0.3327
1	BovineHD0100007001	24250187	2	0.1818	0.2138	1	1	0.8174		1	BovineHD0100007001	2	1	DOM	3/8	105/164	0.5387		1	BovineHD0100007001	2	1	REC	1/10	10/259	0.3618
1	BTA-49269-no-rs	24280702	1	0.3636	0.3303	2	0.818	1.159		1	BTA-49269-no-rs	1	2	DOM	6/5	152/119	1		1	BTA-49269-no-rs	1	2	REC	2/9	27/244	0.3149
1	BovineHD0100007019	24308441	1	0.04545	0.1863	2	0.1518	0.2079		1	BovineHD0100007019	1	2	DOM	1/10	92/179	0.1081		1	BovineHD0100007019	1	2	REC	0/11	9/262	1
1	BovineHD0100007023	24321697	1	0.5455	0.3891	2	0.1814	1.884		1	BovineHD0100007023	1	2	DOM	9/2	170/96	0.3381		1	BovineHD0100007023	1	2	REC	3/8	37/229	0.2013
1	BTB-01976950	24356429	2	0.1818	0.1199	1	0.3305	1.631		1	BTB-01976950	2	1	DOM	3/8	62/209	0.7197		1	BTB-01976950	2	1	REC	1/10	3/268	0.1479
1	BovineHD0100007038	24374438	2	0.5	0.2892	1	0.05362	2.458		1	BovineHD0100007038	2	1	DOM	8/3	137/131	0.2213		1	BovineHD0100007038	2	1	REC	3/8	18/250	0.04107
1	BovineHD0100007040	24382082	2	0.5455	0.3843	1	0.1796	1.922		1	BovineHD0100007040	2	1	DOM	9/2	169/99	0.3377		1	BovineHD0100007040	2	1	REC	3/8	37/231	0.1982
1	BovineHD0100007049	24414918	1	0.3636	0.4336	2	0.6616	0.7465		1	BovineHD0100007049	1	2	DOM	6/5	185/86	0.341		1	BovineHD0100007049	1	2	REC	2/9	50/221	1
1	UA-IFASA-5116	24486748	2	0.3182	0.1531	1	0.06617	2.581		1	UA-IFASA-5116	2	1	DOM	5/6	80/191	0.3158		1	UA-IFASA-5116	2	1	REC	2/9	3/268	0.01301
1	BTB-00007882	24541288	1	0.4545	0.3653	2	0.4994	1.448		1	BTB-00007882	1	2	DOM	7/4	158/113	1		1	BTB-00007882	1	2	REC	3/8	40/231	0.3824
1	BovineHD0100007103	24562856	1	0.3636	0.3123	2	0.6419	1.259		1	BovineHD0100007103	1	2	DOM	7/4	139/130	0.5449		1	BovineHD0100007103	1	2	REC	1/10	29/240	1
1	Hapmap52764-rs29022780	24625263	2	0.4545	0.3026	1	0.1573	1.921		1	Hapmap52764-rs29022780	2	1	DOM	7/4	141/130	0.5464		1	Hapmap52764-rs29022780	2	1	REC	3/8	23/248	0.06986
1	BTB-00008090	24677050	2	0.09091	0.1407	1	0.7544	0.6105		1	BTB-00008090	2	1	DOM	2/9	71/199	0.7339		1	BTB-00008090	2	1	REC	0/11	5/265	1
1	BovineHD0100007162	24715129	2	0.04545	0.1716	1	0.1501	0.2299		1	BovineHD0100007162	2	1	DOM	1/10	81/190	0.1852		1	BovineHD0100007162	2	1	REC	0/11	12/259	1
1	BovineHD0100007166	24727812	1	0.1364	0.2778	2	0.2199	0.4105		1	BovineHD0100007166	1	2	DOM	3/8	128/142	0.2293		1	BovineHD0100007166	1	2	REC	0/11	22/248	1
1	BTA-49236-no-rs	24736398	2	0.09091	0.04797	1	0.2992	1.985		1	BTA-49236-no-rs	2	1	DOM	2/9	26/245	0.2995		1	BTA-49236-no-rs	2	1	REC	0/11	0/271	1
1	BTB-00008277	24758865	1	0.09091	0.05597	2	0.3637	1.687		1	BTB-00008277	1	2	DOM	2/9	29/239	0.3507		1	BTB-00008277	1	2	REC	0/11	1/267	1
1	BovineHD0100007185	24765640	1	0.4091	0.4904	2	0.5179	0.7195		1	BovineHD0100007185	1	2	DOM	7/4	194/66	0.4823		1	BovineHD0100007185	1	2	REC	2/9	61/199	1
1	Hapmap52220-rs29016259	24782983	2	0.4545	0.3579	1	0.3715	1.495		1	Hapmap52220-rs29016259	2	1	DOM	9/2	161/110	0.2095		1	Hapmap52220-rs29016259	2	1	REC	1/10	33/238	1
1	BTA-49243-no-rs	24819532	2	0.4545	0.3685	1	0.5004	1.428		1	BTA-49243-no-rs	2	1	DOM	9/2	161/109	0.2098		1	BTA-49243-no-rs	2	1	REC	1/10	38/232	1
1	BTA-15153-rs29026518	24841162	1	0	0.03903	2	1	0		1	BTA-15153-rs29026518	1	2	DOM	0/11	21/248	1		1	BTA-15153-rs29026518	1	2	REC	0/11	0/269	1
1	BovineHD0100007225	24901336	1	0.5	0.483	2	1	1.07		1	BovineHD0100007225	1	2	DOM	8/3	196/69	1		1	BovineHD0100007225	1	2	REC	3/8	60/205	0.7177
1	BovineHD0100007238	24964189	1	0.04545	0.1546	2	0.2269	0.2604		1	BovineHD0100007238	1	2	DOM	1/10	76/186	0.1895		1	BovineHD0100007238	1	2	REC	0/11	5/257	1
1	BTB-00014074	24984897	1	0.5455	0.4889	2	0.6671	1.254		1	BTB-00014074	1	2	DOM	8/3	203/68	1		1	BTB-00014074	1	2	REC	4/7	62/209	0.2907
1	ARS-BFGL-BAC-11218	25027851	1	0.3182	0.2556	2	0.4678	1.359		1	ARS-BFGL-BAC-11218	1	2	DOM	6/5	118/152	0.5445		1	ARS-BFGL-BAC-11218	1	2	REC	1/10	20/250	0.5813
1	BovineHD0100007277	25086040	1	0.3182	0.3365	2	1	0.9203		1	BovineHD0100007277	1	2	DOM	6/5	151/115	1		1	BovineHD0100007277	1	2	REC	1/10	28/238	1
1	ARS-BFGL-NGS-19076	25126982	1	0.4545	0.487	2	0.83	0.8777		1	ARS-BFGL-NGS-19076	1	2	DOM	8/3	199/71	1		1	ARS-BFGL-NGS-19076	1	2	REC	2/9	64/206	1
1	BovineHD0100007296	25144847	2	0.04545	0.211	1	0.06128	0.178		1	BovineHD0100007296	2	1	DOM	1/10	97/166	0.1038		1	BovineHD0100007296	2	1	REC	0/11	14/249	1
1	chr1_24670381	25147117	1	0.1364	0.132	2	1	1.039		1	chr1_24670381	1	2	DOM	3/8	64/205	0.7279		1	chr1_24670381	1	2	REC	0/11	7/262	1
1	BovineHD0100007305	25161217	1	0.3182	0.3096	2	1	1.041		1	BovineHD0100007305	1	2	DOM	6/5	133/127	1		1	BovineHD0100007305	1	2	REC	1/10	28/232	1
1	BTB-00010532	25169655	1	0.2273	0.2778	2	0.8083	0.7647		1	BTB-00010532	1	2	DOM	5/6	131/139	1		1	BTB-00010532	1	2	REC	0/11	19/251	1
1	BovineHD0100007320	25216165	1	0.1818	0.2643	2	0.467	0.6187		1	BovineHD0100007320	1	2	DOM	4/7	123/140	0.5529		1	BovineHD0100007320	1	2	REC	0/11	16/247	1
1	BovineHD4100000146	25262463	2	0	0.02863	1	1	0		1	BovineHD4100000146	2	1	DOM	0/11	14/248	1		1	BovineHD4100000146	2	1	REC	0/11	1/261	1
1	Hapmap39274-BTA-49324	25283617	1	0.09091	0.262	2	0.08222	0.2817		1	Hapmap39274-BTA-49324	1	2	DOM	2/9	123/148	0.1193		1	Hapmap39274-BTA-49324	1	2	REC	0/11	19/252	1
1	ARS-BFGL-NGS-115371	25316771	1	0.09091	0.2952	2	0.05131	0.2388		1	ARS-BFGL-NGS-115371	1	2	DOM	2/9	138/133	0.06038		1	ARS-BFGL-NGS-115371	1	2	REC	0/11	22/249	1
1	BTB-00010021	25360826	1	0	0.1328	2	0.09577	0		1	BTB-00010021	1	2	DOM	0/11	69/202	0.0711		1	BTB-00010021	1	2	REC	0/11	3/268	1
1	BTA-49319-no-rs	25400262	1	0.2273	0.25	2	1	0.8824		1	BTA-49319-no-rs	1	2	DOM	4/7	116/154	0.7633		1	BTA-49319-no-rs	1	2	REC	1/10	19/251	0.5629
1	BovineHD0100007402	25480755	1	0.6364	0.4885	2	0.1966	1.832		1	BovineHD0100007402	1	2	DOM	10/1	191/71	0.298		1	BovineHD0100007402	1	2	REC	4/7	65/197	0.4775
1	Hapmap53715-rs29017639	25482611	2	0.1818	0.1889	1	1	0.9542		1	Hapmap53715-rs29017639	2	1	DOM	4/7	90/180	1		1	Hapmap53715-rs29017639	2	1	REC	0/11	12/258	1
1	BovineHD0100007407	25495578	1	0.6364	0.4846	2	0.1941	1.861		1	BovineHD0100007407	1	2	DOM	10/1	189/71	0.2979		1	BovineHD0100007407	1	2	REC	4/7	63/197	0.4734
1	BTB-00009762	25511500	1	0.09091	0.1384	2	0.7542	0.6227		1	BTB-00009762	1	2	DOM	2/9	67/204	1		1	BTB-00009762	1	2	REC	0/11	8/263	1
1	ARS-BFGL-NGS-82685	25550567	2	0.4091	0.2251	1	0.06703	2.383		1	ARS-BFGL-NGS-82685	2	1	DOM	7/4	110/161	0.21		1	ARS-BFGL-NGS-82685	2	1	REC	2/9	12/259	0.09743
1	BovineHD0100007439	25595556	1	0.2273	0.5	2	0.01535	0.2941		1	BovineHD0100007439	1	2	DOM	5/6	200/64	0.03428		1	BovineHD0100007439	1	2	REC	0/11	64/200	0.07299
1	BovineHD0100007449	25626372	1	0.4545	0.4815	2	0.8314	0.8974		1	BovineHD0100007449	1	2	DOM	6/5	200/70	0.1697		1	BovineHD0100007449	1	2	REC	4/7	60/210	0.279
1	BTA-49289-no-rs	25651580	1	0.1818	0.3542	2	0.1127	0.4051		1	BTA-49289-no-rs	1	2	DOM	4/7	157/114	0.2152		1	BTA-49289-no-rs	1	2	REC	0/11	35/236	0.3699
1	BovineHD0100007477	25714088	1	0.1364	0.09811	2	0.4729	1.451		1	BovineHD0100007477	1	2	DOM	3/8	50/215	0.4469		1	BovineHD0100007477	1	2	REC	0/11	2/263	1
1	BovineHD0100046406	25745106	2	0.5909	0.4944	1	0.394	1.477		1	BovineHD0100046406	2	1	DOM	10/1	200/66	0.4704		1	BovineHD0100046406	2	1	REC	3/8	63/203	0.7269
1	ARS-BFGL-BAC-13086	25786913	2	0.2273	0.4096	1	0.1195	0.424		1	ARS-BFGL-BAC-13086	2	1	DOM	5/6	176/95	0.2093		1	ARS-BFGL-BAC-13086	2	1	REC	0/11	46/225	0.2212
1	ARS-BFGL-NGS-34568	25819185	1	0.1818	0.08672	2	0.1281	2.34		1	ARS-BFGL-NGS-34568	1	2	DOM	4/7	46/225	0.1104		1	ARS-BFGL-NGS-34568	1	2	REC	0/11	1/270	1
1	BovineHD0100007517	25881846	1	0.1818	0.08922	2	0.1378	2.269		1	BovineHD0100007517	1	2	DOM	4/7	47/222	0.1197		1	BovineHD0100007517	1	2	REC	0/11	1/268	1
1	BovineHD0100007518	25888342	1	0.2273	0.3467	2	0.3588	0.5541		1	BovineHD0100007518	1	2	DOM	5/6	150/111	0.5383		1	BovineHD0100007518	1	2	REC	0/11	31/230	0.6203
1	BTA-49283-no-rs	25923897	1	0.04545	0.1444	2	0.3427	0.2821		1	BTA-49283-no-rs	1	2	DOM	1/10	73/197	0.2983		1	BTA-49283-no-rs	1	2	REC	0/11	5/265	1
1	BovineHD0100007535	25987030	1	0.2273	0.3922	2	0.1786	0.4558		1	BovineHD0100007535	1	2	DOM	5/6	166/103	0.348		1	BovineHD0100007535	1	2	REC	0/11	45/224	0.2216
1	ARS-BFGL-NGS-16145	26001083	2	0.09091	0.1907	1	0.3999	0.4243		1	ARS-BFGL-NGS-16145	2	1	DOM	2/9	93/177	0.3436		1	ARS-BFGL-NGS-16145	2	1	REC	0/11	10/260	1
1	BovineHD0100007541	26026329	1	0.1818	0.3377	2	0.1665	0.4358		1	BovineHD0100007541	1	2	DOM	4/7	147/118	0.2331		1	BovineHD0100007541	1	2	REC	0/11	32/233	0.6225
1	BTB-00009232	26105452	1	0.09091	0.1052	2	1	0.8509		1	BTB-00009232	1	2	DOM	2/9	54/217	1		1	BTB-00009232	1	2	REC	0/11	3/268	1
1	BovineHD0100007558	26124425	1	0.5909	0.4886	2	0.3895	1.512		1	BovineHD0100007558	1	2	DOM	10/1	193/70	0.2986		1	BovineHD0100007558	1	2	REC	3/8	64/199	0.7332
1	ARS-BFGL-NGS-20807	26144886	2	0.5	0.3926	1	0.3752	1.547		1	ARS-BFGL-NGS-20807	2	1	DOM	10/1	172/98	0.1037		1	ARS-BFGL-NGS-20807	2	1	REC	1/10	40/230	1
1	BovineHD0100007577	26169638	2	0.1364	0.3086	1	0.09938	0.3538		1	BovineHD0100007577	2	1	DOM	3/8	139/130	0.1333		1	BovineHD0100007577	2	1	REC	0/11	27/242	0.6079
1	Hapmap26753-BTA-158146	26287535	2	0.2273	0.303	1	0.6354	0.6767		1	Hapmap26753-BTA-158146	2	1	DOM	4/7	133/136	0.5416		1	Hapmap26753-BTA-158146	2	1	REC	1/10	30/239	1
1	BovineHD0100007610	26300728	2	0.5909	0.3636	1	0.04145	2.528		1	BovineHD0100007610	2	1	DOM	8/3	163/101	0.5425		1	BovineHD0100007610	2	1	REC	5/6	29/235	0.005795
1	BovineHD0100007618	26336990	2	0.2727	0.2462	1	0.8018	1.148		1	BovineHD0100007618	2	1	DOM	5/6	115/149	1		1	BovineHD0100007618	2	1	REC	1/10	15/249	0.4893
1	BovineHD0100007641	26411261	2	0.5909	0.3843	1	0.07276	2.314		1	BovineHD0100007641	2	1	DOM	8/3	168/100	0.7514		1	BovineHD0100007641	2	1	REC	5/6	38/230	0.01569
1	BovineHD0100007647	26431102	2	0.3636	0.2472	1	0.2171	1.74		1	BovineHD0100007647	2	1	DOM	7/4	117/152	0.2242		1	BovineHD0100007647	2	1	REC	1/10	16/253	0.5044
1	BovineHD0100007649	26436860	2	0.1818	0.223	1	0.797	0.7741		1	BovineHD0100007649	2	1	DOM	4/7	107/162	1		1	BovineHD0100007649	2	1	REC	0/11	13/256	1
1	BovineHD0100007652	26452516	2	0.5455	0.3233	1	0.03767	2.512		1	BovineHD0100007652	2	1	DOM	8/3	146/120	0.3559		1	BovineHD0100007652	2	1	REC	4/7	26/240	0.02166
1	BovineHD0100007665	26505838	2	0.1818	0.3401	1	0.1662	0.4311		1	BovineHD0100007665	2	1	DOM	4/7	158/111	0.2118		1	BovineHD0100007665	2	1	REC	0/11	25/244	0.6066
1	BovineHD0100007673	26521636	1	0.3636	0.4943	2	0.279	0.5846		1	BovineHD0100007673	1	2	DOM	5/6	200/64	0.03428		1	BovineHD0100007673	1	2	REC	3/8	61/203	0.7216
1	ARS-BFGL-NGS-50954	26559426	1	0.2273	0.2565	2	1	0.8527		1	ARS-BFGL-NGS-50954	1	2	DOM	4/7	117/154	0.7627		1	ARS-BFGL-NGS-50954	1	2	REC	1/10	22/249	1
1	BovineHD0100007713	26609580	2	0.2273	0.3989	1	0.1224	0.4433		1	BovineHD0100007713	2	1	DOM	5/6	164/98	0.3428		1	BovineHD0100007713	2	1	REC	0/11	45/217	0.2206
1	BovineHD0100007728	26635591	2	0.4545	0.3264	1	0.2485	1.72		1	BovineHD0100007728	2	1	DOM	7/4	145/120	0.7592		1	BovineHD0100007728	2	1	REC	3/8	28/237	0.1136
1	BovineHD0100007746	26681454	2	0	0.07836	1	0.3978	0		1	BovineHD0100007746	2	1	DOM	0/11	40/228	0.3744		1	BovineHD0100007746	2	1	REC	0/11	2/266	1
1	BovineHD0100007786	26776298	1	0	0.08178	2	0.2447	0		1	BovineHD0100007786	1	2	DOM	0/11	43/226	0.2247		1	BovineHD0100007786	1	2	REC	0/11	1/268	1
1	Hapmap50927-BTA-28806	26803778	1	0	0.08303	2	0.2441	0		1	Hapmap50927-BTA-28806	1	2	DOM	0/11	44/227	0.2235		1	Hapmap50927-BTA-28806	1	2	REC	0/11	1/270	1
1	BovineHD0100007805	26837703	1	0.5455	0.3282	2	0.04021	2.456		1	BovineHD0100007805	1	2	DOM	8/3	145/117	0.3569		1	BovineHD0100007805	1	2	REC	4/7	27/235	0.02556
1	BovineHD0100007806	26839277	1	0.1818	0.05894	2	0.04471	3.548		1	BovineHD0100007806	1	2	DOM	3/8	31/232	0.1435		1	BovineHD0100007806	1	2	REC	1/10	0/263	0.04015
1	BovineHD0100007822	26880560	2	0.1364	0.1338	1	1	1.022		1	BovineHD0100007822	2	1	DOM	2/9	69/200	0.7354		1	BovineHD0100007822	2	1	REC	1/10	3/266	0.1489
1	BovineHD0100007825	26884051	1	0.05	0.1362	2	0.4981	0.3338		1	BovineHD0100007825	1	2	DOM	1/9	71/197	0.4617		1	BovineHD0100007825	1	2	REC	0/10	2/266	1
1	Hapmap59621-rs29013246	26889213	1	0.1364	0.06089	2	0.1593	2.435		1	Hapmap59621-rs29013246	1	2	DOM	2/9	33/238	0.6325		1	Hapmap59621-rs29013246	1	2	REC	1/10	0/271	0.03901
1	ARS-BFGL-NGS-11151	26921328	1	0.6818	0.4317	2	0.02724	2.821		1	ARS-BFGL-NGS-11151	1	2	DOM	11/0	182/89	0.01927		1	ARS-BFGL-NGS-11151	1	2	REC	4/7	52/219	0.2373
1	BovineHD0100007863	26968734	2	0.3636	0.2398	1	0.2062	1.812		1	BovineHD0100007863	2	1	DOM	7/4	114/155	0.2168		1	BovineHD0100007863	2	1	REC	1/10	15/254	0.4829
1	BovineHD0100007871	26982720	1	0	0.02974	2	1	0		1	BovineHD0100007871	1	2	DOM	0/11	16/253	1		1	BovineHD0100007871	1	2	REC	0/11	0/269	1
1	BovineHD0100007887	27032054	1	0.1364	0.04259	2	0.07536	3.549		1	BovineHD0100007887	1	2	DOM	3/8	23/247	0.07048		1	BovineHD0100007887	1	2	REC	0/11	0/270	1
1	ARS-BFGL-BAC-13744	27106390	2	0.04545	0.05762	1	1	0.7788		1	ARS-BFGL-BAC-13744	2	1	DOM	1/10	30/239	1		1	ARS-BFGL-BAC-13744	2	1	REC	0/11	1/268	1
1	BovineHD0100007915	27118086	2	0.15	0.1393	1	0.7506	1.09		1	BovineHD0100007915	2	1	DOM	3/7	69/193	0.7274		1	BovineHD0100007915	2	1	REC	0/10	4/258	1
1	ARS-BFGL-BAC-5834	27171038	1	0.09091	0.1236	2	1	0.709		1	ARS-BFGL-BAC-5834	1	2	DOM	2/9	64/207	1		1	ARS-BFGL-BAC-5834	1	2	REC	0/11	3/268	1
1	Hapmap51561-BTA-120459	27239572	1	0.3636	0.3782	2	1	0.9394		1	Hapmap51561-BTA-120459	1	2	DOM	5/6	169/102	0.3441		1	Hapmap51561-BTA-120459	1	2	REC	3/8	36/235	0.1833
1	BovineHD0100007956	27267066	2	0.4091	0.487	1	0.52	0.7293		1	BovineHD0100007956	2	1	DOM	7/4	203/66	0.4756		1	BovineHD0100007956	2	1	REC	2/9	59/210	1
1	BovineHD0100007959	27294161	2	0.1364	0.07993	1	0.4133	1.818		1	BovineHD0100007959	2	1	DOM	3/8	41/228	0.3875		1	BovineHD0100007959	2	1	REC	0/11	2/267	1
1	BovineHD0100007973	27322794	2	0.4091	0.4888	1	0.5189	0.7239		1	BovineHD0100007973	2	1	DOM	7/4	203/66	0.4756		1	BovineHD0100007973	2	1	REC	2/9	60/209	1
1	BovineHD0100007992	27357800	1	0.3182	0.2862	2	0.8106	1.164		1	BovineHD0100007992	1	2	DOM	6/5	132/137	0.7671		1	BovineHD0100007992	1	2	REC	1/10	22/247	1
1	BovineHD0100007997	27369765	1	0.3182	0.2727	2	0.6304	1.244		1	BovineHD0100007997	1	2	DOM	6/5	130/134	0.7677		1	BovineHD0100007997	1	2	REC	1/10	14/250	0.4668
1	BTA-108804-no-rs	27491647	1	0.2273	0.4077	2	0.1198	0.4272		1	BTA-108804-no-rs	1	2	DOM	5/6	176/95	0.2093		1	BTA-108804-no-rs	1	2	REC	0/11	45/226	0.2221
1	Hapmap42876-BTA-23541	27602693	1	0.4545	0.4465	2	1	1.033		1	Hapmap42876-BTA-23541	1	2	DOM	6/5	185/86	0.341		1	Hapmap42876-BTA-23541	1	2	REC	4/7	57/214	0.2601
1	BovineHD0100008084	27634159	1	0.1364	0.07993	2	0.4133	1.818		1	BovineHD0100008084	1	2	DOM	3/8	41/228	0.3875		1	BovineHD0100008084	1	2	REC	0/11	2/267	1
1	BTB-00011225	27706076	2	0.3182	0.2657	1	0.6245	1.29		1	BTB-00011225	2	1	DOM	6/5	126/145	0.7602		1	BTB-00011225	2	1	REC	1/10	18/253	0.5424
1	BovineHD0100008157	27829763	2	0.35	0.2319	1	0.2802	1.783		1	BovineHD0100008157	2	1	DOM	5/5	110/153	0.747		1	BovineHD0100008157	2	1	REC	2/8	12/251	0.08687
1	Hapmap50048-BTA-59263	27922359	1	0.4091	0.3339	2	0.4938	1.381		1	Hapmap50048-BTA-59263	1	2	DOM	7/4	155/116	0.7638		1	Hapmap50048-BTA-59263	1	2	REC	2/9	26/245	0.2995
1	BovineHD0100008201	27988236	2	0.2727	0.3011	1	1	0.8704		1	BovineHD0100008201	2	1	DOM	6/5	140/129	1		1	BovineHD0100008201	2	1	REC	0/11	22/247	1
1	BovineHD0100008210	28027702	2	0.4545	0.4331	1	0.8306	1.091		1	BovineHD0100008210	2	1	DOM	8/3	185/84	1		1	BovineHD0100008210	2	1	REC	2/9	48/221	1
1	BovineHD0100008220	28064356	1	0.1818	0.1636	2	0.771	1.136		1	BovineHD0100008220	1	2	DOM	4/7	75/194	0.5109		1	BovineHD0100008220	1	2	REC	0/11	13/256	1
1	BovineHD0100008239	28153747	1	0.1364	0.1877	2	0.7802	0.6832		1	BovineHD0100008239	1	2	DOM	3/8	96/173	0.7518		1	BovineHD0100008239	1	2	REC	0/11	5/264	1
1	BovineHD0100008245	28181841	1	0.4091	0.3704	2	0.8225	1.177		1	BovineHD0100008245	1	2	DOM	7/4	172/98	1		1	BovineHD0100008245	1	2	REC	2/9	28/242	0.3319
1	BTB-01285304	28217099	2	0.04545	0.19	1	0.09739	0.203		1	BTB-01285304	2	1	DOM	1/10	92/179	0.1081		1	BTB-01285304	2	1	REC	0/11	11/260	1
1	BTB-01285382	28243053	2	0.09091	0.06273	1	0.6443	1.494		1	BTB-01285382	2	1	DOM	2/9	32/239	0.628		1	BTB-01285382	2	1	REC	0/11	2/269	1
1	BTB-01285492	28272873	2	0.09091	0.1218	1	1	0.7212		1	BTB-01285492	2	1	DOM	2/9	58/213	1		1	BTB-01285492	2	1	REC	0/11	8/263	1
1	BovineHD0100008286	28320522	1	0.4091	0.4262	2	1	0.9321		1	BovineHD0100008286	1	2	DOM	8/3	185/86	1		1	BovineHD0100008286	1	2	REC	1/10	46/225	0.6976
1	BovineHD0100008303	28378968	2	0.1818	0.2007	1	1	0.8848		1	BovineHD0100008303	2	1	DOM	4/7	95/174	1		1	BovineHD0100008303	2	1	REC	0/11	13/256	1
1	BovineHD0100008315	28408061	1	0.5	0.2993	2	0.05829	2.342		1	BovineHD0100008315	1	2	DOM	8/3	140/129	0.2258		1	BovineHD0100008315	1	2	REC	3/8	21/248	0.0579
1	BTB-01285832	28434475	1	0.3182	0.2528	2	0.4632	1.38		1	BTB-01285832	1	2	DOM	6/5	121/150	0.551		1	BTB-01285832	1	2	REC	1/10	16/255	0.5018
1	BTB-01285855	28489054	2	0.2727	0.1859	1	0.279	1.642		1	BTB-01285855	2	1	DOM	5/6	93/176	0.5241		1	BTB-01285855	2	1	REC	1/10	7/262	0.2773
1	Hapmap59457-rs29010971	28529358	2	0.5	0.3745	1	0.2654	1.67		1	Hapmap59457-rs29010971	2	1	DOM	7/4	165/106	1		1	Hapmap59457-rs29010971	2	1	REC	4/7	38/233	0.06408
1	BTB-01285931	28566525	1	0.3636	0.2897	2	0.4766	1.401		1	BTB-01285931	1	2	DOM	7/4	134/137	0.5406		1	BTB-01285931	1	2	REC	1/10	23/248	1
1	BTB-01334157	28612680	1	0.5	0.4594	2	0.8281	1.177		1	BTB-01334157	1	2	DOM	9/2	192/79	0.7345		1	BTB-01334157	1	2	REC	2/9	57/214	1
1	BovineHD0100008371	28628277	1	0.1364	0.2727	2	0.2191	0.4211		1	BovineHD0100008371	1	2	DOM	3/8	127/137	0.2249		1	BovineHD0100008371	1	2	REC	0/11	17/247	1
1	BovineHD0100008372	28638172	1	0.1364	0.2251	2	0.4371	0.5436		1	BovineHD0100008372	1	2	DOM	3/8	109/162	0.535		1	BovineHD0100008372	1	2	REC	0/11	13/258	1
1	BovineHD0100008394	28741233	1	0.09091	0.2122	2	0.28	0.3713		1	BovineHD0100008394	1	2	DOM	2/9	104/167	0.2179		1	BovineHD0100008394	1	2	REC	0/11	11/260	1
1	BovineHD0100008409	28792375	2	0.3182	0.3395	1	1	0.908		1	BovineHD0100008409	2	1	DOM	4/7	152/119	0.2276		1	BovineHD0100008409	2	1	REC	3/8	32/239	0.1437
1	ARS-BFGL-BAC-15042	28839476	1	0.2727	0.2657	2	1	1.036		1	ARS-BFGL-BAC-15042	1	2	DOM	5/6	128/143	1		1	ARS-BFGL-BAC-15042	1	2	REC	1/10	16/255	0.5018
1	BovineHD0100008426	28852017	2	0.5909	0.4723	1	0.2865	1.614		1	BovineHD0100008426	2	1	DOM	10/1	200/71	0.2998		1	BovineHD0100008426	2	1	REC	3/8	56/215	0.7039
1	BovineHD0100008438	28894165	1	0.2727	0.3034	2	1	0.8611		1	BovineHD0100008438	1	2	DOM	5/6	138/129	0.7644		1	BovineHD0100008438	1	2	REC	1/10	24/243	1
1	BovineHD0100008449	28939657	1	0.2273	0.1587	2	0.3773	1.56		1	BovineHD0100008449	1	2	DOM	5/6	81/190	0.3193		1	BovineHD0100008449	1	2	REC	0/11	5/266	1
1	BTB-00012150	29021209	2	0.5909	0.4723	1	0.2865	1.614		1	BTB-00012150	2	1	DOM	9/2	192/79	0.7345		1	BTB-00012150	2	1	REC	4/7	64/207	0.3048
1	BovineHD0100008468	29027310	2	0.09091	0.1722	1	0.5589	0.4806		1	BovineHD0100008468	2	1	DOM	2/9	79/191	0.7347		1	BovineHD0100008468	2	1	REC	0/11	14/256	1
1	BTB-00012128	29047612	2	0.5455	0.428	1	0.2826	1.603		1	BTB-00012128	2	1	DOM	8/3	182/89	1		1	BTB-00012128	2	1	REC	4/7	50/221	0.2307
1	ARS-BFGL-BAC-14387	29071379	1	0.3182	0.4779	2	0.1909	0.5099		1	ARS-BFGL-BAC-14387	1	2	DOM	6/5	192/79	0.3126		1	ARS-BFGL-BAC-14387	1	2	REC	1/10	67/204	0.4701
1	ARS-BFGL-NGS-20624	29124102	1	0.09091	0.1107	2	1	0.8033		1	ARS-BFGL-NGS-20624	1	2	DOM	2/9	56/215	1		1	ARS-BFGL-NGS-20624	1	2	REC	0/11	4/267	1
1	BovineHD0100008522	29147074	1	0.2273	0.184	2	0.5795	1.304		1	BovineHD0100008522	1	2	DOM	5/6	92/177	0.5217		1	BovineHD0100008522	1	2	REC	0/11	7/262	1
1	BTB-00011831	29217927	2	0.5	0.3911	1	0.3745	1.557		1	BTB-00011831	2	1	DOM	9/2	168/103	0.2203		1	BTB-00011831	2	1	REC	2/9	44/227	0.6964
1	BTB-00012396	29239316	2	0.5909	0.4201	1	0.1269	1.994		1	BTB-00012396	2	1	DOM	9/2	175/94	0.3413		1	BTB-00012396	2	1	REC	4/7	51/218	0.2351
1	BovineHD0100008555	29249975	1	0.09091	0.1347	2	0.7544	0.6425		1	BovineHD0100008555	1	2	DOM	2/9	67/204	1		1	BovineHD0100008555	1	2	REC	0/11	6/265	1
1	ARS-BFGL-BAC-15059	29316022	1	0.1818	0.2159	2	1	0.8072		1	ARS-BFGL-BAC-15059	1	2	DOM	4/7	105/166	1		1	ARS-BFGL-BAC-15059	1	2	REC	0/11	12/259	1
1	ARS-BFGL-NGS-119690	29353509	1	0.5909	0.4096	2	0.1214	2.082		1	ARS-BFGL-NGS-119690	1	2	DOM	9/2	174/97	0.3387		1	ARS-BFGL-NGS-119690	1	2	REC	4/7	48/223	0.1241
1	ARS-BFGL-BAC-15061	29386594	2	0.5909	0.3963	1	0.07819	2.2		1	ARS-BFGL-BAC-15061	2	1	DOM	9/2	173/97	0.3385		1	ARS-BFGL-BAC-15061	2	1	REC	4/7	41/229	0.08072
1	BTA-59279-no-rs	29411641	2	0.1364	0.1144	1	0.7313	1.222		1	BTA-59279-no-rs	2	1	DOM	3/8	58/213	0.7084		1	BTA-59279-no-rs	2	1	REC	0/11	4/267	1
1	BTB-00012425	29424487	2	0.2273	0.1919	1	0.5932	1.239		1	BTB-00012425	2	1	DOM	5/6	95/176	0.5277		1	BTB-00012425	2	1	REC	0/11	9/262	1
1	BTB-00012448	29451206	1	0.1818	0.2214	2	0.7973	0.7815		1	BTB-00012448	1	2	DOM	4/7	108/163	1		1	BTB-00012448	1	2	REC	0/11	12/259	1
1	BTB-01734642	29520198	2	0.2727	0.31	1	0.8171	0.8348		1	BTB-01734642	2	1	DOM	6/5	146/125	1		1	BTB-01734642	2	1	REC	0/11	22/249	1
1	ARS-BFGL-NGS-108911	29541996	1	0.4091	0.3155	2	0.3582	1.502		1	ARS-BFGL-NGS-108911	1	2	DOM	7/4	147/124	0.7592		1	ARS-BFGL-NGS-108911	1	2	REC	2/9	24/247	0.2688
1	ARS-BFGL-NGS-100058	29576850	1	0.5	0.4	2	0.3802	1.5		1	ARS-BFGL-NGS-100058	1	2	DOM	8/3	177/93	0.7541		1	ARS-BFGL-NGS-100058	1	2	REC	3/8	39/231	0.2167
1	BTB-00012560	29641444	1	0.1364	0.08487	2	0.4271	1.703		1	BTB-00012560	1	2	DOM	3/8	44/227	0.4006		1	BTB-00012560	1	2	REC	0/11	2/269	1
1	Hapmap40010-BTA-59286	29687411	2	0.6364	0.476	1	0.1911	1.926		1	Hapmap40010-BTA-59286	2	1	DOM	9/2	198/73	0.7331		1	Hapmap40010-BTA-59286	2	1	REC	5/6	60/211	0.1344
1	BovineHD0100008662	29712048	1	0.1818	0.1519	2	0.7608	1.241		1	BovineHD0100008662	1	2	DOM	3/8	79/191	1		1	BovineHD0100008662	1	2	REC	1/10	3/267	0.1484
1	BTB-00012627	29718126	1	0.5	0.4296	2	0.5193	1.328		1	BTB-00012627	1	2	DOM	8/3	181/89	1		1	BTB-00012627	1	2	REC	3/8	51/219	0.4472
1	ARS-BFGL-BAC-11193	29747969	1	0.3182	0.4631	2	0.1979	0.541		1	ARS-BFGL-BAC-11193	1	2	DOM	5/6	194/77	0.08789		1	ARS-BFGL-BAC-11193	1	2	REC	2/9	57/214	1
1	BovineHD0100008680	29773499	1	0.6364	0.4889	2	0.1969	1.83		1	BovineHD0100008680	1	2	DOM	9/2	202/68	0.7369		1	BovineHD0100008680	1	2	REC	5/6	62/208	0.1396
1	BovineHD0100008695	29835507	2	0.6364	0.4852	1	0.1947	1.856		1	BovineHD0100008695	2	1	DOM	9/2	202/69	0.736		1	BovineHD0100008695	2	1	REC	5/6	61/210	0.1365
1	ARS-BFGL-NGS-24142	29859693	2	0.1364	0.1033	1	0.4935	1.37		1	ARS-BFGL-NGS-24142	2	1	DOM	2/9	56/215	1		1	ARS-BFGL-NGS-24142	2	1	REC	1/10	0/271	0.03901
1	BovineHD0100008702	29875513	2	0.3182	0.4755	1	0.1914	0.5148		1	BovineHD0100008702	2	1	DOM	5/6	192/73	0.08234		1	BovineHD0100008702	2	1	REC	2/9	60/205	1
1	BovineHD0100008719	29915443	2	0.1364	0.1506	1	1	0.8908		1	BovineHD0100008719	2	1	DOM	3/8	76/193	1		1	BovineHD0100008719	2	1	REC	0/11	5/264	1
1	BovineHD0100008729	29938999	1	0.3182	0.4519	2	0.2757	0.5661		1	BovineHD0100008729	1	2	DOM	5/6	188/82	0.1044		1	BovineHD0100008729	1	2	REC	2/9	56/214	1
1	ARS-BFGL-NGS-114084	29944908	2	0.1364	0.1605	1	1	0.8258		1	ARS-BFGL-NGS-114084	2	1	DOM	3/8	80/191	1		1	ARS-BFGL-NGS-114084	2	1	REC	0/11	7/264	1
1	ARS-USMARC-Parent-DQ451555-rs29010795	29963400	1	0.6364	0.4834	2	0.1937	1.87		1	ARS-USMARC-Parent-DQ451555-rs29010795	1	2	DOM	9/2	201/70	0.7349		1	ARS-USMARC-Parent-DQ451555-rs29010795	1	2	REC	5/6	61/210	0.1365
1	BovineHD0100008739	29980510	1	0.5455	0.4026	2	0.1914	1.78		1	BovineHD0100008739	1	2	DOM	9/2	170/97	0.3378		1	BovineHD0100008739	1	2	REC	3/8	45/222	0.41
1	BovineHD0100008741	29984913	1	0.1364	0.1338	2	1	1.022		1	BovineHD0100008741	1	2	DOM	3/8	68/201	1		1	BovineHD0100008741	1	2	REC	0/11	4/265	1
1	BovineHD0100008745	30003117	1	0.5	0.3783	2	0.2687	1.644		1	BovineHD0100008745	1	2	DOM	8/3	161/106	0.5362		1	BovineHD0100008745	1	2	REC	3/8	41/226	0.3889
1	BovineHD0100008746	30006137	2	0.6364	0.4926	1	0.1998	1.802		1	BovineHD0100008746	2	1	DOM	9/2	201/70	0.7349		1	BovineHD0100008746	2	1	REC	5/6	66/205	0.1516
1	BovineHD0100008748	30011802	1	0.5455	0.3858	2	0.1801	1.911		1	BovineHD0100008748	1	2	DOM	9/2	164/103	0.2167		1	BovineHD0100008748	1	2	REC	3/8	42/225	0.3936
1	BovineHD0100008749	30018380	1	0.4545	0.2889	2	0.1005	2.051		1	BovineHD0100008749	1	2	DOM	8/3	136/134	0.2189		1	BovineHD0100008749	1	2	REC	2/9	20/250	0.2093
1	ARS-BFGL-NGS-40513	30092167	1	0.2273	0.3672	2	0.2575	0.5069		1	ARS-BFGL-NGS-40513	1	2	DOM	4/7	159/112	0.212		1	ARS-BFGL-NGS-40513	1	2	REC	1/10	40/231	1
1	BovineHD0100008775	30113163	1	0.1818	0.1328	2	0.5206	1.451		1	BovineHD0100008775	1	2	DOM	3/8	67/204	1		1	BovineHD0100008775	1	2	REC	1/10	5/266	0.2141
1	BovineHD0100008800	30232831	2	0.4545	0.4015	1	0.661	1.242		1	BovineHD0100008800	2	1	DOM	9/2	171/98	0.3378		1	BovineHD0100008800	2	1	REC	1/10	45/224	1
1	BTA-59299-no-rs	30241742	1	0.2273	0.2565	2	1	0.8527		1	BTA-59299-no-rs	1	2	DOM	5/6	122/149	1		1	BTA-59299-no-rs	1	2	REC	0/11	17/254	1
1	BTA-59305-no-rs	30323359	2	0.1364	0.1171	1	0.7353	1.19		1	BTA-59305-no-rs	2	1	DOM	3/8	59/210	0.7121		1	BTA-59305-no-rs	2	1	REC	0/11	4/265	1
1	BovineHD0100008840	30392152	2	0.1364	0.1852	1	0.7799	0.6947		1	BovineHD0100008840	2	1	DOM	3/8	90/180	1		1	BovineHD0100008840	2	1	REC	0/11	10/260	1
1	ARS-BFGL-BAC-7369	30418294	2	0	0.02399	1	1	0		1	ARS-BFGL-BAC-7369	2	1	DOM	0/11	12/259	1		1	ARS-BFGL-BAC-7369	2	1	REC	0/11	1/270	1
1	ARS-BFGL-NGS-14285	30449967	2	0.1364	0.1624	1	1	0.8146		1	ARS-BFGL-NGS-14285	2	1	DOM	3/8	81/190	1		1	ARS-BFGL-NGS-14285	2	1	REC	0/11	7/264	1
1	BTB-01490065	30659162	1	0.09091	0.08704	2	1	1.049		1	BTB-01490065	1	2	DOM	2/9	44/226	0.6974		1	BTB-01490065	1	2	REC	0/11	3/267	1
1	ARS-BFGL-NGS-73149	30694694	2	0.09091	0.1444	1	0.7552	0.5923		1	ARS-BFGL-NGS-73149	2	1	DOM	2/9	74/196	0.7328		1	ARS-BFGL-NGS-73149	2	1	REC	0/11	4/266	1
1	BovineHD0100008921	30743768	2	0.1818	0.1798	1	1	1.014		1	BovineHD0100008921	2	1	DOM	4/7	87/180	0.7537		1	BovineHD0100008921	2	1	REC	0/11	9/258	1
1	BovineHD0100008923	30746202	2	0.1818	0.1798	1	1	1.014		1	BovineHD0100008923	2	1	DOM	4/7	87/180	0.7537		1	BovineHD0100008923	2	1	REC	0/11	9/258	1
1	BovineHD0100008924	30746814	1	0.1818	0.1798	2	1	1.014		1	BovineHD0100008924	1	2	DOM	4/7	87/180	0.7537		1	BovineHD0100008924	1	2	REC	0/11	9/258	1
1	BovineHD0100008927	30750780	2	0.1818	0.1798	1	1	1.014		1	BovineHD0100008927	2	1	DOM	4/7	87/180	0.7537		1	BovineHD0100008927	2	1	REC	0/11	9/258	1
1	BovineHD0100008928	30751532	1	0.1818	0.1798	2	1	1.014		1	BovineHD0100008928	1	2	DOM	4/7	87/180	0.7537		1	BovineHD0100008928	1	2	REC	0/11	9/258	1
1	BovineHD0100008930	30755257	1	0.1818	0.1798	2	1	1.014		1	BovineHD0100008930	1	2	DOM	4/7	87/180	0.7537		1	BovineHD0100008930	1	2	REC	0/11	9/258	1
1	BTA-97531-no-rs	30759148	1	0.1818	0.1827	2	1	0.9944		1	BTA-97531-no-rs	1	2	DOM	4/7	90/181	1		1	BTA-97531-no-rs	1	2	REC	0/11	9/262	1
1	BovineHD0100008936	30780515	1	0.04545	0.07037	2	1	0.6291		1	BovineHD0100008936	1	2	DOM	1/10	37/233	1		1	BovineHD0100008936	1	2	REC	0/11	1/269	1
1	BTB-01490270	30840833	2	0.5	0.4225	1	0.5138	1.367		1	BTB-01490270	2	1	DOM	9/2	180/91	0.349		1	BTB-01490270	2	1	REC	2/9	49/222	1
1	BovineHD0100008950	30893510	2	0.2727	0.2323	1	0.6145	1.239		1	BovineHD0100008950	2	1	DOM	5/6	114/155	1		1	BovineHD0100008950	2	1	REC	1/10	11/258	0.3879
1	BTA-18114-no-rs	30972284	1	0	0.04244	2	1	0		1	BTA-18114-no-rs	1	2	DOM	0/11	21/250	1		1	BTA-18114-no-rs	1	2	REC	0/11	2/269	1
1	ARS-BFGL-NGS-40158	30999614	2	0.09091	0.1328	1	0.7547	0.6528		1	ARS-BFGL-NGS-40158	2	1	DOM	2/9	67/204	1		1	ARS-BFGL-NGS-40158	2	1	REC	0/11	5/266	1
1	ARS-BFGL-BAC-11830	31035369	2	0.09091	0.09779	1	1	0.9226		1	ARS-BFGL-BAC-11830	2	1	DOM	2/9	51/220	1		1	ARS-BFGL-BAC-11830	2	1	REC	0/11	2/269	1
1	BTB-01303393	31082779	1	0.1818	0.2177	2	1	0.7985		1	BTB-01303393	1	2	DOM	4/7	107/164	1		1	BTB-01303393	1	2	REC	0/11	11/260	1
1	BTB-01303334	31129370	2	0.09091	0.1019	1	1	0.8818		1	BTB-01303334	2	1	DOM	2/9	52/218	1		1	BTB-01303334	2	1	REC	0/11	3/267	1
1	BTA-87372-no-rs	31151496	1	0.5	0.4834	2	1	1.069		1	BTA-87372-no-rs	1	2	DOM	7/4	198/73	0.4988		1	BTA-87372-no-rs	1	2	REC	4/7	64/207	0.3048
1	BTA-41946-no-rs	31171747	1	0.3636	0.2823	2	0.4702	1.453		1	BTA-41946-no-rs	1	2	DOM	5/6	132/139	1		1	BTA-41946-no-rs	1	2	REC	3/8	21/250	0.05686
1	Hapmap32039-BTA-131798	31250241	1	0.04545	0.06089	2	1	0.7345		1	Hapmap32039-BTA-131798	1	2	DOM	1/10	33/238	1		1	Hapmap32039-BTA-131798	1	2	REC	0/11	0/271	1
1	BovineHD0100009052	31270891	1	0.1364	0.1537	2	1	0.8694		1	BovineHD0100009052	1	2	DOM	3/8	77/193	1		1	BovineHD0100009052	1	2	REC	0/11	6/264	1
1	Hapmap50687-BTA-41950	31302244	1	0.09091	0.07749	2	0.6865	1.19		1	Hapmap50687-BTA-41950	1	2	DOM	2/9	41/230	0.6772		1	Hapmap50687-BTA-41950	1	2	REC	0/11	1/270	1
1	BTB-00013894	31424587	2	0.04545	0.05904	1	1	0.7589		1	BTB-00013894	2	1	DOM	1/10	32/239	1		1	BTB-00013894	2	1	REC	0/11	0/271	1
1	ARS-BFGL-NGS-97949	31450731	2	0	0.03321	1	1	0		1	ARS-BFGL-NGS-97949	2	1	DOM	0/11	16/255	1		1	ARS-BFGL-NGS-97949	2	1	REC	0/11	2/269	1
1	BovineHD0100009129	31557192	1	0.4091	0.2722	2	0.222	1.851		1	BovineHD0100009129	1	2	DOM	8/3	129/141	0.1299		1	BovineHD0100009129	1	2	REC	1/10	18/252	0.5437
1	BTA-110980-no-rs	31606418	1	0.5455	0.4539	2	0.5135	1.444		1	BTA-110980-no-rs	1	2	DOM	8/3	186/85	1		1	BTA-110980-no-rs	1	2	REC	4/7	60/211	0.2776
1	BTB-01653833	31639548	2	0.5455	0.4742	1	0.5233	1.331		1	BTB-01653833	2	1	DOM	9/2	198/73	0.7331		1	BTB-01653833	2	1	REC	3/8	59/212	0.711
1	BTB-01653794	31672750	1	0.4091	0.3506	2	0.6502	1.283		1	BTB-01653794	1	2	DOM	8/3	160/111	0.534		1	BTB-01653794	1	2	REC	1/10	30/241	1
1	BTB-01335754	31699827	2	0.1364	0.1605	1	1	0.8258		1	BTB-01335754	2	1	DOM	3/8	83/188	1		1	BTB-01335754	2	1	REC	0/11	4/267	1
1	BTB-01335860	31755884	1	0.1818	0.1033	2	0.2776	1.929		1	BTB-01335860	1	2	DOM	3/8	55/216	0.702		1	BTB-01335860	1	2	REC	1/10	1/270	0.07663
1	BovineHD0100009190	31915959	2	0.2273	0.2111	1	0.7939	1.099		1	BovineHD0100009190	2	1	DOM	4/7	103/167	1		1	BovineHD0100009190	2	1	REC	1/10	11/259	0.3868
1	BovineHD0100009210	32073771	2	0.4545	0.3843	1	0.511	1.335		1	BovineHD0100009210	2	1	DOM	7/4	164/104	1		1	BovineHD0100009210	2	1	REC	3/8	42/226	0.3928
1	BTB-01843131	32091115	1	0.1818	0.2122	2	1	0.8251		1	BTB-01843131	1	2	DOM	4/7	104/167	1		1	BTB-01843131	1	2	REC	0/11	11/260	1
1	ARS-BFGL-NGS-80747	32132657	2	0.2273	0.2454	1	1	0.9045		1	ARS-BFGL-NGS-80747	2	1	DOM	5/6	117/154	1		1	ARS-BFGL-NGS-80747	2	1	REC	0/11	16/255	1
1	BTB-01955576	32247439	2	0.1818	0.179	1	1	1.019		1	BTB-01955576	2	1	DOM	3/8	87/184	1		1	BTB-01955576	2	1	REC	1/10	10/261	0.3597
1	BTB-01755357	32304105	2	0.4545	0.3672	1	0.5	1.436		1	BTB-01755357	2	1	DOM	7/4	163/108	1		1	BTB-01755357	2	1	REC	3/8	36/235	0.1833
1	BTB-02018681	32357222	1	0.1818	0.1766	2	1	1.036		1	BTB-02018681	1	2	DOM	3/8	84/185	1		1	BTB-02018681	1	2	REC	1/10	11/258	0.3879
1	BTB-00014284	32424393	2	0.2273	0.2122	1	0.7948	1.092		1	BTB-00014284	2	1	DOM	5/6	105/166	0.7556		1	BTB-00014284	2	1	REC	0/11	10/261	1
1	BTB-00014368	32511532	1	0.1818	0.1716	2	0.7801	1.073		1	BTB-00014368	1	2	DOM	3/8	82/189	1		1	BTB-00014368	1	2	REC	1/10	11/260	0.3857
1	BTB-00014500	32640244	1	0.2273	0.2897	2	0.636	0.7212		1	BTB-00014500	1	2	DOM	5/6	134/137	1		1	BTB-00014500	1	2	REC	0/11	23/248	0.6085
1	BTB-00014527	32683856	2	0.1364	0.1208	1	0.7413	1.149		1	BTB-00014527	2	1	DOM	3/8	60/209	0.715		1	BTB-00014527	2	1	REC	0/11	5/264	1
1	Hapmap38175-BTA-69177	32741957	1	0.4091	0.428	2	1	0.9251		1	Hapmap38175-BTA-69177	1	2	DOM	8/3	186/85	1		1	Hapmap38175-BTA-69177	1	2	REC	1/10	46/225	0.6976
1	BovineHD0100009346	32866434	1	0.5	0.4963	2	1	1.015		1	BovineHD0100009346	1	2	DOM	9/2	202/68	0.7369		1	BovineHD0100009346	1	2	REC	2/9	66/204	1
1	BTB-00014850	32943411	1	0.1364	0.1611	2	1	0.8221		1	BTB-00014850	1	2	DOM	3/8	79/191	1		1	BTB-00014850	1	2	REC	0/11	8/262	1
1	BTB-00014929	32993823	2	0.1364	0.1661	1	1	0.793		1	BTB-00014929	2	1	DOM	3/8	79/192	1		1	BTB-00014929	2	1	REC	0/11	11/260	1
1	BTA-69182-no-rs	33076473	2	0.3636	0.2657	1	0.3295	1.579		1	BTA-69182-no-rs	2	1	DOM	5/6	124/147	1		1	BTA-69182-no-rs	2	1	REC	3/8	20/251	0.05088
1	BTB-00015164	33136647	1	0.3182	0.369	2	0.822	0.798		1	BTB-00015164	1	2	DOM	6/5	163/108	0.7595		1	BTB-00015164	1	2	REC	1/10	37/234	1
1	Hapmap58994-rs29021251	33175064	1	0.04545	0.04982	2	1	0.9083		1	Hapmap58994-rs29021251	1	2	DOM	1/10	25/246	1		1	Hapmap58994-rs29021251	1	2	REC	0/11	2/269	1
1	BovineHD0100009448	33218979	1	0.3636	0.4685	2	0.3878	0.6482		1	BovineHD0100009448	1	2	DOM	6/5	199/71	0.1747		1	BovineHD0100009448	1	2	REC	2/9	54/216	1
1	BTB-00016647	33342088	1	0.4091	0.4336	2	1	0.9044		1	BTB-00016647	1	2	DOM	7/4	184/87	0.7506		1	BTB-00016647	1	2	REC	2/9	51/220	1
1	BTA-69212-no-rs	33398878	1	0.3182	0.3911	2	0.6563	0.7264		1	BTA-69212-no-rs	1	2	DOM	6/5	176/95	0.5277		1	BTA-69212-no-rs	1	2	REC	1/10	36/235	1
1	BovineHD0100009494	33426743	1	0.5	0.3358	2	0.1669	1.978		1	BovineHD0100009494	1	2	DOM	7/4	150/121	0.7599		1	BovineHD0100009494	1	2	REC	4/7	32/239	0.03845
1	BovineHD0100009515	33496557	1	0.1818	0.2426	2	0.6187	0.6938		1	BovineHD0100009515	1	2	DOM	3/8	116/154	0.3651		1	BovineHD0100009515	1	2	REC	1/10	15/255	0.4816
1	Hapmap48855-BTA-69221	33560583	2	0.04545	0.2472	1	0.03749	0.145		1	Hapmap48855-BTA-69221	2	1	DOM	1/10	118/153	0.02776		1	Hapmap48855-BTA-69221	2	1	REC	0/11	16/255	1
1	BovineHD0100009559	33607347	1	0.5455	0.4352	2	0.3819	1.557		1	BovineHD0100009559	1	2	DOM	8/3	184/86	1		1	BovineHD0100009559	1	2	REC	4/7	51/219	0.2344
1	BTA-69226-no-rs	33610831	1	0.6818	0.4004	2	0.01334	3.209		1	BTA-69226-no-rs	1	2	DOM	11/0	173/98	0.00978		1	BTA-69226-no-rs	1	2	REC	4/7	44/227	0.09756
1	BovineHD0100009570	33634151	1	0.1364	0.4407	2	0.003975	0.2004		1	BovineHD0100009570	1	2	DOM	3/8	181/89	0.009823		1	BovineHD0100009570	1	2	REC	0/11	57/213	0.1281
1	BovineHD0100009592	33688529	2	0.3182	0.2019	1	0.1852	1.845		1	BovineHD0100009592	2	1	DOM	6/5	99/171	0.34		1	BovineHD0100009592	2	1	REC	1/10	10/260	0.3607
1	BTB-00902072	33805826	1	0.09091	0.1259	2	1	0.6941		1	BTB-00902072	1	2	DOM	2/9	63/207	1		1	BTB-00902072	1	2	REC	0/11	5/265	1
1	BovineHD0100009633	33826972	2	0.3636	0.4906	1	0.2811	0.5932		1	BovineHD0100009633	2	1	DOM	8/3	199/68	1		1	BovineHD0100009633	2	1	REC	0/11	63/204	0.07505
1	BovineHD0100009652	33903021	2	0.8	0.4815	1	0.005655	4.308		1	BovineHD0100009652	2	1	DOM	10/0	196/74	0.06746		1	BovineHD0100009652	2	1	REC	6/4	64/206	0.01783
1	ARS-BFGL-NGS-45064	33916347	2	0.7273	0.4428	1	0.01441	3.356		1	ARS-BFGL-NGS-45064	2	1	DOM	11/0	186/85	0.03776		1	ARS-BFGL-NGS-45064	2	1	REC	5/6	54/217	0.05615
1	BovineHD0100009664	33935558	1	0.3636	0.4336	2	0.6616	0.7465		1	BovineHD0100009664	1	2	DOM	6/5	185/86	0.341		1	BovineHD0100009664	1	2	REC	2/9	50/221	1
1	Hapmap43403-BTA-91448	33964232	2	0.3636	0.2768	1	0.4669	1.493		1	Hapmap43403-BTA-91448	2	1	DOM	5/6	130/141	1		1	Hapmap43403-BTA-91448	2	1	REC	3/8	20/251	0.05088
1	BTB-01419032	33988612	2	0.04545	0.09888	1	0.7121	0.434		1	BTB-01419032	2	1	DOM	1/10	51/217	0.6956		1	BTB-01419032	2	1	REC	0/11	2/266	1
1	BovineHD0100009674	33992020	1	0.5909	0.487	2	0.3887	1.521		1	BovineHD0100009674	1	2	DOM	9/2	200/70	0.7347		1	BovineHD0100009674	1	2	REC	4/7	63/207	0.2993
1	BTA-91456-no-rs	34021093	2	0.04545	0.0941	1	0.7107	0.4585		1	BTA-91456-no-rs	2	1	DOM	1/10	51/220	0.6954		1	BTA-91456-no-rs	2	1	REC	0/11	0/271	1
1	Hapmap34824-BES10_Contig592_452	34068395	1	0.4091	0.3727	2	0.8229	1.165		1	Hapmap34824-BES10_Contig592_452	1	2	DOM	7/4	167/104	1		1	Hapmap34824-BES10_Contig592_452	1	2	REC	2/9	35/236	0.6423
1	BovineHD0100009723	34158319	1	0.1364	0.1648	2	1	0.8001		1	BovineHD0100009723	1	2	DOM	3/8	81/189	1		1	BovineHD0100009723	1	2	REC	0/11	8/262	1
1	BTB-00929993	34231964	2	0	0.04428	1	0.6164	0		1	BTB-00929993	2	1	DOM	0/11	24/247	0.6072		1	BTB-00929993	2	1	REC	0/11	0/271	1
1	Hapmap55373-rs29027574	34360152	1	0.2727	0.3376	2	0.648	0.7357		1	Hapmap55373-rs29027574	1	2	DOM	6/5	157/114	1		1	Hapmap55373-rs29027574	1	2	REC	0/11	26/245	0.6069
1	BTB-00930093	34400126	2	0.04545	0.1107	1	0.4958	0.3825		1	BTB-00930093	2	1	DOM	1/10	59/212	0.4671		1	BTB-00930093	2	1	REC	0/11	1/270	1
1	BTB-00930215	34424718	1	0.3636	0.3542	2	1	1.042		1	BTB-00930215	1	2	DOM	7/4	159/112	1		1	BTB-00930215	1	2	REC	1/10	33/238	1
1	BTB-00930351	34458042	2	0.04545	0.09041	1	0.7106	0.4791		1	BTB-00930351	2	1	DOM	1/10	49/222	0.6954		1	BTB-00930351	2	1	REC	0/11	0/271	1
1	Hapmap49364-BTA-89353	34500276	2	0.2273	0.3339	1	0.3609	0.5866		1	Hapmap49364-BTA-89353	2	1	DOM	5/6	149/122	0.5539		1	Hapmap49364-BTA-89353	2	1	REC	0/11	32/239	0.62
1	BTB-01965833	34602877	1	0.5455	0.4649	2	0.5171	1.381		1	BTB-01965833	1	2	DOM	8/3	193/78	1		1	BTB-01965833	1	2	REC	4/7	59/212	0.2715
1	BTB-01965810	34624045	2	0.1364	0.1144	1	0.7313	1.222		1	BTB-01965810	2	1	DOM	2/9	56/215	1		1	BTB-01965810	2	1	REC	1/10	6/265	0.2454
1	BovineHD0100009808	34629115	1	0.3636	0.4889	2	0.2823	0.5974		1	BovineHD0100009808	1	2	DOM	5/6	188/82	0.1044		1	BovineHD0100009808	1	2	REC	3/8	76/194	1
1	BovineHD0100009809	34638715	1	0.2273	0.3801	2	0.1802	0.4796		1	BovineHD0100009809	1	2	DOM	3/8	159/108	0.05668		1	BovineHD0100009809	1	2	REC	2/9	44/223	1
1	Hapmap43629-BTA-60810	34663026	1	0.3182	0.4981	2	0.1275	0.4701		1	Hapmap43629-BTA-60810	1	2	DOM	6/5	194/76	0.3055		1	Hapmap43629-BTA-60810	1	2	REC	1/10	75/195	0.2986
1	BTB-01211075	34723604	2	0.04545	0.3444	1	0.002074	0.09063		1	BTB-01211075	2	1	DOM	1/10	147/123	0.003752		1	BTB-01211075	2	1	REC	0/11	39/231	0.3718
1	Hapmap47907-BTA-29493	34756687	1	0.1364	0.06273	2	0.1691	2.359		1	Hapmap47907-BTA-29493	1	2	DOM	3/8	34/237	0.163		1	Hapmap47907-BTA-29493	1	2	REC	0/11	0/271	1
1	Hapmap43823-BTA-27227	34779787	2	0.5	0.4649	1	0.8288	1.151		1	Hapmap43823-BTA-27227	2	1	DOM	8/3	193/78	1		1	Hapmap43823-BTA-27227	2	1	REC	3/8	59/212	0.711
1	BTB-01890914	34803049	2	0.09091	0.2638	1	0.08185	0.279		1	BTB-01890914	2	1	DOM	2/9	125/146	0.1188		1	BTB-01890914	2	1	REC	0/11	18/253	1
1	UA-IFASA-4161	34824930	2	0.5	0.4613	1	0.8283	1.168		1	UA-IFASA-4161	2	1	DOM	8/3	191/80	1		1	UA-IFASA-4161	2	1	REC	3/8	59/212	0.711
1	BTB-01210899	34866883	2	0.04545	0.07963	1	1	0.5504		1	BTB-01210899	2	1	DOM	1/10	40/230	1		1	BTB-01210899	2	1	REC	0/11	3/267	1
1	ARS-BFGL-BAC-12481	34908448	1	0.09091	0.3339	2	0.01832	0.1994		1	ARS-BFGL-BAC-12481	1	2	DOM	2/9	143/128	0.03084		1	ARS-BFGL-BAC-12481	1	2	REC	0/11	38/233	0.3703
1	BovineHD0100009896	34918486	2	0.04545	0.1124	1	0.4953	0.3762		1	BovineHD0100009896	2	1	DOM	1/10	56/211	0.4704		1	BovineHD0100009896	2	1	REC	0/11	4/263	1
1	BovineHD0100009902	34927781	2	0	0.04815	1	0.6162	0		1	BovineHD0100009902	2	1	DOM	0/11	25/245	0.6067		1	BovineHD0100009902	2	1	REC	0/11	1/269	1
1	BTB-00017000	34931862	2	0.3636	0.2897	1	0.4766	1.401		1	BTB-00017000	2	1	DOM	5/6	135/136	1		1	BTB-00017000	2	1	REC	3/8	22/249	0.06319
1	Hapmap43052-BTA-79184	34954810	1	0.1818	0.1513	2	0.7604	1.247		1	Hapmap43052-BTA-79184	1	2	DOM	4/7	75/196	0.5081		1	Hapmap43052-BTA-79184	1	2	REC	0/11	7/264	1
1	BTA-79188-no-rs	34978818	2	0.04545	0.03889	1	0.5917	1.177		1	BTA-79188-no-rs	2	1	DOM	1/10	21/249	0.599		1	BTA-79188-no-rs	2	1	REC	0/11	0/270	1
1	BTA-111131-no-rs	35000632	2	0.5455	0.4059	1	0.2687	1.756		1	BTA-111131-no-rs	2	1	DOM	7/4	179/92	1		1	BTA-111131-no-rs	2	1	REC	5/6	41/230	0.0201
1	BovineHD0100009933	35043254	2	0.5455	0.395	1	0.1849	1.838		1	BovineHD0100009933	2	1	DOM	9/2	166/96	0.3375		1	BovineHD0100009933	2	1	REC	3/8	41/221	0.3925
1	BTB-01210806	35050813	1	0.5455	0.3911	2	0.1826	1.868		1	BTB-01210806	1	2	DOM	9/2	171/100	0.3378		1	BTB-01210806	1	2	REC	3/8	41/230	0.3863
1	BovineHD0100009941	35065680	1	0.4545	0.374	2	0.5029	1.395		1	BovineHD0100009941	1	2	DOM	7/4	157/105	1		1	BovineHD0100009941	1	2	REC	3/8	39/223	0.3835
1	BovineHD0100009943	35076740	1	0.4545	0.3664	2	0.4995	1.441		1	BovineHD0100009943	1	2	DOM	7/4	154/108	1		1	BovineHD0100009943	1	2	REC	3/8	38/224	0.2189
1	BovineHD0100009944	35081085	1	0.4545	0.3664	2	0.4995	1.441		1	BovineHD0100009944	1	2	DOM	7/4	154/108	1		1	BovineHD0100009944	1	2	REC	3/8	38/224	0.2189
1	BovineHD0100009945	35082343	1	0.4545	0.3611	2	0.375	1.474		1	BovineHD0100009945	1	2	DOM	7/4	157/113	0.7671		1	BovineHD0100009945	1	2	REC	3/8	38/232	0.2059
1	BovineHD0100009950	35109384	1	0.5909	0.4679	2	0.2824	1.642		1	BovineHD0100009950	1	2	DOM	9/2	192/73	0.7327		1	BovineHD0100009950	1	2	REC	4/7	56/209	0.2616
1	BovineHD0100009954	35124823	2	0.5909	0.4777	1	0.3849	1.579		1	BovineHD0100009954	2	1	DOM	9/2	197/72	0.7332		1	BovineHD0100009954	2	1	REC	4/7	60/209	0.2805
1	BTA-111133-no-rs	35149839	1	0.1818	0.3819	2	0.07152	0.3596		1	BTA-111133-no-rs	1	2	DOM	4/7	166/105	0.1207		1	BTA-111133-no-rs	1	2	REC	0/11	41/230	0.376
1	BovineHD0100009976	35197382	2	0.04545	0.1604	1	0.2276	0.2493		1	BovineHD0100009976	2	1	DOM	1/10	84/181	0.1814		1	BovineHD0100009976	2	1	REC	0/11	1/264	1
1	ARS-BFGL-NGS-100434	35277715	1	0.09091	0.1882	2	0.3986	0.4314		1	ARS-BFGL-NGS-100434	1	2	DOM	2/9	98/173	0.3381		1	ARS-BFGL-NGS-100434	1	2	REC	0/11	4/267	1
1	BovineHD0100010000	35292924	1	0.5455	0.4532	2	0.5133	1.448		1	BovineHD0100010000	1	2	DOM	9/2	188/79	0.5183		1	BovineHD0100010000	1	2	REC	3/8	54/213	0.7016
1	BovineHD0100010002	35301764	1	0.1818	0.2185	2	0.7979	0.7947		1	BovineHD0100010002	1	2	DOM	4/7	110/160	1		1	BovineHD0100010002	1	2	REC	0/11	8/262	1
1	BovineHD0100010009	35343945	1	0.4091	0.3327	2	0.4927	1.388		1	BovineHD0100010009	1	2	DOM	6/5	146/123	1		1	BovineHD0100010009	1	2	REC	3/8	33/236	0.1557
1	BTB-00016701	35345339	2	0.2273	0.428	1	0.0775	0.393		1	BTB-00016701	2	1	DOM	5/6	185/86	0.1853		1	BTB-00016701	2	1	REC	0/11	47/224	0.2207
1	BovineHD0100010010	35346762	1	0.3636	0.4981	2	0.2775	0.5758		1	BovineHD0100010010	1	2	DOM	7/4	197/65	0.4775		1	BovineHD0100010010	1	2	REC	1/10	64/198	0.4684
1	BovineHD0100010011	35347543	2	0.3636	0.4943	1	0.279	0.5847		1	BovineHD0100010011	2	1	DOM	7/4	196/66	0.4807		1	BovineHD0100010011	2	1	REC	1/10	63/199	0.467
1	BovineHD0100010012	35348417	1	0.3636	0.4943	2	0.279	0.5845		1	BovineHD0100010012	1	2	DOM	7/4	198/67	0.4815		1	BovineHD0100010012	1	2	REC	1/10	64/201	0.4675
1	BovineHD0100010019	35371662	2	0.1818	0.09815	1	0.2653	2.042		1	BovineHD0100010019	2	1	DOM	3/8	50/220	0.4399		1	BovineHD0100010019	2	1	REC	1/10	3/267	0.1484
1	BovineHD0100010029	35401745	1	0.5455	0.3981	2	0.1874	1.814		1	BovineHD0100010029	1	2	DOM	9/2	174/96	0.3393		1	BovineHD0100010029	1	2	REC	3/8	41/229	0.3869
1	DPI-55	35424977	1	0.09091	0.1389	2	0.7542	0.62		1	DPI-55	1	2	DOM	2/9	70/200	0.7347		1	DPI-55	1	2	REC	0/11	5/265	1
1	BovineHD0100010042	35440283	1	0.5455	0.4033	2	0.1921	1.775		1	BovineHD0100010042	1	2	DOM	9/2	176/93	0.3429		1	BovineHD0100010042	1	2	REC	3/8	41/228	0.3875
1	BovineHD0100010051	35462050	1	0.4545	0.3123	2	0.1671	1.835		1	BovineHD0100010051	1	2	DOM	9/2	137/132	0.06291		1	BovineHD0100010051	1	2	REC	1/10	31/238	1
1	BovineHD0100010072	35546605	2	0.4091	0.3611	1	0.656	1.225		1	BovineHD0100010072	2	1	DOM	7/4	163/107	1		1	BovineHD0100010072	2	1	REC	2/9	32/238	0.6285
1	Hapmap32018-BTA-123851	35567873	2	0.1818	0.1716	1	0.7801	1.073		1	Hapmap32018-BTA-123851	2	1	DOM	4/7	82/189	0.7406		1	Hapmap32018-BTA-123851	2	1	REC	0/11	11/260	1
1	BovineHD0100010132	35686183	1	0.3636	0.2389	2	0.2051	1.821		1	BovineHD0100010132	1	2	DOM	7/4	110/160	0.2103		1	BovineHD0100010132	1	2	REC	1/10	19/251	0.5629
1	BTB-00016898	35722253	2	0.04545	0.1033	1	0.7149	0.4133		1	BTB-00016898	2	1	DOM	1/10	54/217	0.6976		1	BTB-00016898	2	1	REC	0/11	2/269	1
1	BTB-00016906	35774336	2	0.2273	0.179	1	0.572	1.349		1	BTB-00016906	2	1	DOM	4/7	91/180	1		1	BTB-00016906	2	1	REC	1/10	6/265	0.2454
1	ARS-BFGL-NGS-60721	35809354	1	0.2727	0.2159	2	0.5973	1.362		1	ARS-BFGL-NGS-60721	1	2	DOM	6/5	101/170	0.3424		1	ARS-BFGL-NGS-60721	1	2	REC	0/11	16/255	1
1	BovineHD0100010183	35833095	1	0.4545	0.283	2	0.09464	2.111		1	BovineHD0100010183	1	2	DOM	9/2	122/143	0.02828		1	BovineHD0100010183	1	2	REC	1/10	28/237	1
1	BovineHD0100010199	35884896	1	0.4091	0.2759	2	0.2242	1.817		1	BovineHD0100010199	1	2	DOM	7/4	124/146	0.3569		1	BovineHD0100010199	1	2	REC	2/9	25/245	0.2856
1	BovineHD0100010213	35933171	1	0.3182	0.2695	2	0.6275	1.265		1	BovineHD0100010213	1	2	DOM	5/6	121/148	1		1	BovineHD0100010213	1	2	REC	2/9	24/245	0.2716
1	BovineHD0100010229	35976438	2	0.3636	0.2602	1	0.3233	1.624		1	BovineHD0100010229	2	1	DOM	6/5	118/151	0.5455		1	BovineHD0100010229	2	1	REC	2/9	22/247	0.2409
1	DPI-2	36007508	2	0.2273	0.1476	1	0.3556	1.699		1	DPI-2	2	1	DOM	4/7	72/199	0.4945		1	DPI-2	2	1	REC	1/10	8/263	0.3047
1	BovineHD0100010243	36026109	1	0.5	0.4317	2	0.6617	1.316		1	BovineHD0100010243	1	2	DOM	8/3	186/85	1		1	BovineHD0100010243	1	2	REC	3/8	48/223	0.4247
1	BTB-00017157	36215840	2	0.2273	0.1439	1	0.3502	1.75		1	BTB-00017157	2	1	DOM	4/7	70/201	0.4867		1	BTB-00017157	2	1	REC	1/10	8/263	0.3047
1	BovineHD0100010274	36241055	2	0.4545	0.4594	1	1	0.9806		1	BovineHD0100010274	2	1	DOM	8/3	187/84	1		1	BovineHD0100010274	2	1	REC	2/9	62/209	1
1	BovineHD0100010279	36271350	2	0.2273	0.1311	1	0.2007	1.95		1	BovineHD0100010279	2	1	DOM	4/7	64/203	0.4719		1	BovineHD0100010279	2	1	REC	1/10	6/261	0.2486
1	Hapmap40144-BTA-79228	36294078	1	0	0.01481	2	1	0		1	Hapmap40144-BTA-79228	1	2	DOM	0/11	8/262	1		1	Hapmap40144-BTA-79228	1	2	REC	0/11	0/270	1
1	BovineHD0100010292	36303690	2	0.2273	0.4682	1	0.02918	0.3341		1	BovineHD0100010292	2	1	DOM	5/6	185/82	0.1079		1	BovineHD0100010292	2	1	REC	0/11	65/202	0.07277
1	BovineHD0100010297	36315758	2	0.4091	0.3407	1	0.5005	1.339		1	BovineHD0100010297	2	1	DOM	7/4	153/117	0.7623		1	BovineHD0100010297	2	1	REC	2/9	31/239	0.6242
1	Hapmap41641-BTA-79222	36352663	1	0.4091	0.4631	2	0.6681	0.8026		1	Hapmap41641-BTA-79222	1	2	DOM	7/4	194/77	0.5183		1	Hapmap41641-BTA-79222	1	2	REC	2/9	57/214	1
1	BTB-00017988	36393512	1	0.1364	0.3838	2	0.02273	0.2535		1	BTB-00017988	1	2	DOM	3/8	161/110	0.05701		1	BTB-00017988	1	2	REC	0/11	47/224	0.2207
1	BovineHD0100010321	36401673	1	0.5	0.3056	2	0.06242	2.273		1	BovineHD0100010321	1	2	DOM	8/3	141/129	0.2269		1	BovineHD0100010321	1	2	REC	3/8	24/246	0.07752
1	BovineHD0100010328	36426174	1	0.1364	0.263	2	0.2218	0.4426		1	BovineHD0100010328	1	2	DOM	3/8	125/145	0.3551		1	BovineHD0100010328	1	2	REC	0/11	17/253	1
1	ARS-BFGL-BAC-4996	36459510	1	0.5	0.2989	2	0.05808	2.346		1	ARS-BFGL-BAC-4996	1	2	DOM	8/3	138/133	0.2206		1	ARS-BFGL-BAC-4996	1	2	REC	3/8	24/247	0.07685
1	Hapmap57330-rs29009759	36486706	1	0.1818	0.1734	2	1	1.059		1	Hapmap57330-rs29009759	1	2	DOM	4/7	88/183	0.753		1	Hapmap57330-rs29009759	1	2	REC	0/11	6/265	1
1	BTA-79216-no-rs	36519957	2	0.1818	0.04613	1	0.02167	4.596		1	BTA-79216-no-rs	2	1	DOM	3/8	24/247	0.07685		1	BTA-79216-no-rs	2	1	REC	1/10	1/270	0.07663
1	BovineHD0100010364	36554587	2	0.2727	0.5019	1	0.04847	0.3722		1	BovineHD0100010364	2	1	DOM	6/5	198/72	0.1798		1	BovineHD0100010364	2	1	REC	0/11	73/197	0.07196
1	BTB-00017697	36582476	1	0.2273	0.06827	2	0.01832	4.014		1	BTB-00017697	1	2	DOM	4/7	36/235	0.05467		1	BTB-00017697	1	2	REC	1/10	1/270	0.07663
1	ARS-BFGL-BAC-11284	36610037	1	0.1818	0.4041	2	0.04432	0.3278		1	ARS-BFGL-BAC-11284	1	2	DOM	4/7	173/98	0.1072		1	ARS-BFGL-BAC-11284	1	2	REC	0/11	46/225	0.2212
1	ARS-BFGL-NGS-116207	36639642	2	0.09091	0.3321	1	0.01838	0.2011		1	ARS-BFGL-NGS-116207	2	1	DOM	2/9	150/121	0.02644		1	ARS-BFGL-NGS-116207	2	1	REC	0/11	30/241	0.6136
1	Hapmap50474-BTA-79209	36666981	2	0	0.02214	1	1	0		1	Hapmap50474-BTA-79209	2	1	DOM	0/11	12/259	1		1	Hapmap50474-BTA-79209	2	1	REC	0/11	0/271	1
1	BovineHD0100010393	36673470	1	0.5909	0.4465	2	0.1965	1.791		1	BovineHD0100010393	1	2	DOM	8/3	180/91	0.7568		1	BovineHD0100010393	1	2	REC	5/6	62/209	0.139
1	BTB-00017422	36693898	2	0.2727	0.1956	1	0.4116	1.542		1	BTB-00017422	2	1	DOM	5/6	91/180	0.5182		1	BTB-00017422	2	1	REC	1/10	15/256	0.4803
1	BovineHD0100010400	36708125	2	0.4545	0.3759	1	0.5043	1.383		1	BovineHD0100010400	2	1	DOM	7/4	161/109	1		1	BovineHD0100010400	2	1	REC	3/8	42/228	0.3913
1	BovineHD0100010416	36791630	1	0.1364	0.2823	2	0.1524	0.4014		1	BovineHD0100010416	1	2	DOM	3/8	136/135	0.2178		1	BovineHD0100010416	1	2	REC	0/11	17/254	1
1	Hapmap43356-BTA-79201	36796167	1	0.04545	0.1771	2	0.1492	0.2212		1	Hapmap43356-BTA-79201	1	2	DOM	1/10	88/183	0.1822		1	Hapmap43356-BTA-79201	1	2	REC	0/11	8/263	1
1	BovineHD0100010421	36813260	2	0.1818	0.4465	1	0.0152	0.2755		1	BovineHD0100010421	2	1	DOM	4/7	179/92	0.05526		1	BovineHD0100010421	2	1	REC	0/11	63/208	0.131
1	BovineHD0100010461	36943147	2	0.5	0.4188	1	0.5116	1.388		1	BovineHD0100010461	2	1	DOM	7/4	166/105	1		1	BovineHD0100010461	2	1	REC	4/7	61/210	0.284
1	Hapmap50634-BTA-26738	36991506	2	0.3182	0.3266	1	1	0.9623		1	Hapmap50634-BTA-26738	2	1	DOM	5/6	148/123	0.557		1	Hapmap50634-BTA-26738	2	1	REC	2/9	29/242	0.3456
1	BovineHD0100010491	37050569	2	0.2273	0.1421	1	0.3478	1.776		1	BovineHD0100010491	2	1	DOM	4/7	70/201	0.4867		1	BovineHD0100010491	2	1	REC	1/10	7/264	0.2756
1	Hapmap49369-BTA-89952	37219767	1	0.3636	0.3506	2	1	1.059		1	Hapmap49369-BTA-89952	1	2	DOM	6/5	157/114	1		1	Hapmap49369-BTA-89952	1	2	REC	2/9	33/238	0.6325
1	BovineHD0100010528	37232068	2	0.2273	0.2082	1	0.7915	1.119		1	BovineHD0100010528	2	1	DOM	4/7	99/170	1		1	BovineHD0100010528	2	1	REC	1/10	13/256	0.4372
1	BovineHD0100010535	37260062	2	0.4091	0.4077	1	1	1.006		1	BovineHD0100010535	2	1	DOM	7/4	179/92	1		1	BovineHD0100010535	2	1	REC	2/9	42/229	0.6835
1	BTA-115758-no-rs	37299219	2	0.04545	0.1015	1	0.7136	0.4216		1	BTA-115758-no-rs	2	1	DOM	1/10	53/218	0.6966		1	BTA-115758-no-rs	2	1	REC	0/11	2/269	1
1	BovineHD0100010565	37336681	2	0.4545	0.4205	1	0.8269	1.149		1	BovineHD0100010565	2	1	DOM	8/3	176/88	1		1	BovineHD0100010565	2	1	REC	2/9	46/218	1
1	BovineHD0100010579	37359664	1	0.2273	0.2528	2	1	0.8695		1	BovineHD0100010579	1	2	DOM	4/7	119/152	0.761		1	BovineHD0100010579	1	2	REC	1/10	18/253	0.5424
1	BovineHD0100010581	37368303	1	0.09091	0.1245	2	1	0.703		1	BovineHD0100010581	1	2	DOM	2/9	63/202	1		1	BovineHD0100010581	1	2	REC	0/11	3/262	1
1	DPI-27	37381473	1	0.5	0.3081	2	0.06436	2.246		1	DPI-27	1	2	DOM	7/4	138/133	0.5425		1	DPI-27	1	2	REC	4/7	29/242	0.0285
1	BTA-111760-no-rs	37412751	1	0.04545	0.07011	2	1	0.6316		1	BTA-111760-no-rs	1	2	DOM	1/10	37/234	1		1	BTA-111760-no-rs	1	2	REC	0/11	1/270	1
1	BovineHD4100000204	37455994	1	0.5909	0.3487	2	0.0242	2.698		1	BovineHD4100000204	1	2	DOM	8/3	153/118	0.3617		1	BovineHD4100000204	1	2	REC	5/6	36/235	0.01215
1	Hapmap46343-BTA-111768	37513415	2	0.5909	0.3561	1	0.03949	2.612		1	Hapmap46343-BTA-111768	2	1	DOM	8/3	157/114	0.3717		1	Hapmap46343-BTA-111768	2	1	REC	5/6	36/235	0.01215
1	BTA-111771-no-rs	37570425	2	0.4091	0.4019	1	1	1.03		1	BTA-111771-no-rs	2	1	DOM	6/5	170/100	0.7519		1	BTA-111771-no-rs	2	1	REC	3/8	47/223	0.4193
1	BovineHD0100010640	37575077	1	0.09091	0.3346	2	0.01827	0.1989		1	BovineHD0100010640	1	2	DOM	2/9	143/123	0.02866		1	BovineHD0100010640	1	2	REC	0/11	35/231	0.3693
1	ARS-BFGL-NGS-84905	37606303	2	0.3182	0.3667	1	0.8219	0.8061		1	ARS-BFGL-NGS-84905	2	1	DOM	4/7	156/114	0.216		1	ARS-BFGL-NGS-84905	2	1	REC	3/8	42/228	0.3913
1	BTA-120277-no-rs	37642573	1	0.4091	0.1919	2	0.02482	2.916		1	BTA-120277-no-rs	1	2	DOM	6/5	86/185	0.1853		1	BTA-120277-no-rs	1	2	REC	3/8	18/253	0.03995
1	BovineHD0100010694	37723915	2	0.4545	0.4887	1	0.8296	0.8719		1	BovineHD0100010694	2	1	DOM	7/4	194/71	0.4971		1	BovineHD0100010694	2	1	REC	3/8	65/200	0.7352
1	BovineHD4100000205	37780384	1	0.2727	0.3303	2	0.6501	0.7605		1	BovineHD4100000205	1	2	DOM	5/6	145/126	0.7602		1	BovineHD4100000205	1	2	REC	1/10	34/237	1
1	BovineHD0100010740	37812572	2	0.4545	0.461	1	1	0.9745		1	BovineHD0100010740	2	1	DOM	7/4	192/77	0.735		1	BovineHD0100010740	2	1	REC	3/8	56/213	0.7048
1	BovineHD0100010753	37875353	2	0.3182	0.2435	1	0.4504	1.45		1	BovineHD0100010753	2	1	DOM	5/6	111/158	0.7662		1	BovineHD0100010753	2	1	REC	2/9	20/249	0.2105
1	BovineHD0100010754	37876071	2	0.3182	0.2538	1	0.4648	1.372		1	BovineHD0100010754	2	1	DOM	5/6	113/151	1		1	BovineHD0100010754	2	1	REC	2/9	21/243	0.2319
1	Hapmap42111-BTA-122184	37900339	2	0	0.01107	1	1	0		1	Hapmap42111-BTA-122184	2	1	DOM	0/11	6/265	1		1	Hapmap42111-BTA-122184	2	1	REC	0/11	0/271	1
1	ARS-BFGL-NGS-23720	37942216	2	0.5	0.3893	1	0.3737	1.569		1	ARS-BFGL-NGS-23720	2	1	DOM	8/3	168/103	0.5441		1	ARS-BFGL-NGS-23720	2	1	REC	3/8	43/228	0.3954
1	ARS-BFGL-NGS-53463	38076935	2	0.3182	0.2343	1	0.4417	1.525		1	ARS-BFGL-NGS-53463	2	1	DOM	5/6	109/162	0.7611		1	ARS-BFGL-NGS-53463	2	1	REC	2/9	18/253	0.1787
1	BovineHD0100010842	38112817	2	0.04545	0.2876	1	0.01283	0.118		1	BovineHD0100010842	2	1	DOM	1/10	131/135	0.01111		1	BovineHD0100010842	2	1	REC	0/11	22/244	1
1	BovineHD0100010886	38222228	1	0.5455	0.4599	2	0.5147	1.409		1	BovineHD0100010886	1	2	DOM	8/3	186/76	1		1	BovineHD0100010886	1	2	REC	4/7	55/207	0.2596
1	ARS-BFGL-NGS-100005	38262971	1	0.2727	0.3524	2	0.5024	0.6891		1	ARS-BFGL-NGS-100005	1	2	DOM	6/5	155/116	1		1	ARS-BFGL-NGS-100005	1	2	REC	0/11	36/235	0.3694
1	ARS-BFGL-NGS-114608	38309499	1	0.3182	0.4142	2	0.5079	0.6601		1	ARS-BFGL-NGS-114608	1	2	DOM	6/5	171/97	0.5377		1	ARS-BFGL-NGS-114608	1	2	REC	1/10	51/217	0.6956
1	BovineHD0100010966	38434232	1	0.4091	0.2226	2	0.06552	2.417		1	BovineHD0100010966	1	2	DOM	7/4	105/160	0.1275		1	BovineHD0100010966	1	2	REC	2/9	13/252	0.1142
1	BovineHD0100010977	38490335	1	0.3636	0.303	2	0.637	1.315		1	BovineHD0100010977	1	2	DOM	6/5	135/134	1		1	BovineHD0100010977	1	2	REC	2/9	28/241	0.3336
1	BovineHD0100011008	38597502	2	0.1364	0.1734	1	1	0.7525		1	BovineHD0100011008	2	1	DOM	3/8	86/185	1		1	BovineHD0100011008	2	1	REC	0/11	8/263	1
1	ARS-BFGL-NGS-42813	38630217	2	0.2727	0.2362	1	0.7981	1.213		1	ARS-BFGL-NGS-42813	2	1	DOM	5/6	109/162	0.7611		1	ARS-BFGL-NGS-42813	2	1	REC	1/10	19/252	0.5615
1	BovineHD0100011029	38649320	1	0.4545	0.4586	2	1	0.9836		1	BovineHD0100011029	1	2	DOM	8/3	176/90	0.7558		1	BovineHD0100011029	1	2	REC	2/9	68/198	0.7356
1	BovineHD0100011034	38673068	1	0.5	0.2955	2	0.05624	2.385		1	BovineHD0100011034	1	2	DOM	9/2	130/134	0.06035		1	BovineHD0100011034	1	2	REC	2/9	26/238	0.3105
1	ARS-BFGL-NGS-85768	38707374	2	0	0.07749	1	0.3965	0		1	ARS-BFGL-NGS-85768	2	1	DOM	0/11	39/232	0.3716		1	ARS-BFGL-NGS-85768	2	1	REC	0/11	3/268	1
1	BTA-16749-no-rs	38752163	1	0.1818	0.07196	2	0.07799	2.866		1	BTA-16749-no-rs	1	2	DOM	3/8	37/234	0.1937		1	BTA-16749-no-rs	1	2	REC	1/10	2/269	0.1129
1	Hapmap51081-BTA-89053	38776974	1	0	0.01296	2	1	0		1	Hapmap51081-BTA-89053	1	2	DOM	0/11	7/263	1		1	Hapmap51081-BTA-89053	1	2	REC	0/11	0/270	1
1	BovineHD0100011072	38816049	2	0.2727	0.321	1	0.8163	0.7931		1	BovineHD0100011072	2	1	DOM	4/7	147/124	0.3565		1	BovineHD0100011072	2	1	REC	2/9	27/244	0.3149
1	BovineHD0100011079	38856511	1	0.09091	0.3008	2	0.03244	0.2325		1	BovineHD0100011079	1	2	DOM	2/9	130/136	0.06338		1	BovineHD0100011079	1	2	REC	0/11	30/236	0.6151
1	BovineHD0100011092	38919419	1	0.1818	0.1823	2	1	0.9966		1	BovineHD0100011092	1	2	DOM	3/8	88/178	1		1	BovineHD0100011092	1	2	REC	1/10	9/257	0.3377
1	BovineHD0100011097	38944944	1	0.09091	0.2698	2	0.08126	0.2706		1	BovineHD0100011097	1	2	DOM	2/9	124/141	0.07109		1	BovineHD0100011097	1	2	REC	0/11	19/246	1
1	BovineHD0100011107	38985194	2	0.09091	0.2962	1	0.0513	0.2376		1	BovineHD0100011107	2	1	DOM	2/9	131/134	0.06208		1	BovineHD0100011107	2	1	REC	0/11	26/239	0.6071
1	ARS-BFGL-NGS-97815	39014333	1	0.4545	0.2952	2	0.1523	1.99		1	ARS-BFGL-NGS-97815	1	2	DOM	8/3	129/142	0.1289		1	ARS-BFGL-NGS-97815	1	2	REC	2/9	31/240	0.6238
1	BovineHD0100011117	39054297	2	0.1364	0.3459	1	0.06272	0.2986		1	BovineHD0100011117	2	1	DOM	3/8	152/114	0.06467		1	BovineHD0100011117	2	1	REC	0/11	32/234	0.622
1	BovineHD0100011134	39142467	2	0.3182	0.4792	1	0.1905	0.5072		1	BovineHD0100011134	2	1	DOM	6/5	187/77	0.3127		1	BovineHD0100011134	2	1	REC	1/10	66/198	0.3051
1	BTA-109574-no-rs	39198219	2	0.4091	0.3819	1	0.8252	1.12		1	BTA-109574-no-rs	2	1	DOM	7/4	162/109	1		1	BTA-109574-no-rs	2	1	REC	2/9	45/226	1
1	Hapmap39970-BTA-117984	39249574	1	0.2727	0.2565	2	0.8077	1.087		1	Hapmap39970-BTA-117984	1	2	DOM	5/6	120/151	1		1	Hapmap39970-BTA-117984	1	2	REC	1/10	19/252	0.5615
1	ARS-BFGL-NGS-26011	39292042	1	0.5	0.3247	2	0.1058	2.08		1	ARS-BFGL-NGS-26011	1	2	DOM	8/3	143/128	0.2305		1	ARS-BFGL-NGS-26011	1	2	REC	3/8	33/238	0.1532
1	BTA-96881-no-rs	39365760	2	0.5	0.2823	1	0.05182	2.542		1	BTA-96881-no-rs	2	1	DOM	8/3	129/142	0.1289		1	BTA-96881-no-rs	2	1	REC	3/8	24/247	0.07685
1	BovineHD0100011202	39399871	1	0.5	0.3155	2	0.1006	2.17		1	BovineHD0100011202	1	2	DOM	8/3	140/131	0.2238		1	BovineHD0100011202	1	2	REC	3/8	31/240	0.1344
1	BovineHD0100011251	39585612	2	0.4091	0.5019	1	0.515	0.6871		1	BovineHD0100011251	2	1	DOM	7/4	203/63	0.3062		1	BovineHD0100011251	2	1	REC	2/9	64/202	1
1	BovineHD0100011262	39638269	1	0.1818	0.2838	2	0.3443	0.5607		1	BovineHD0100011262	1	2	DOM	4/7	129/137	0.5442		1	BovineHD0100011262	1	2	REC	0/11	22/244	1
1	Hapmap47738-BTA-79246	39643915	2	0.3636	0.3093	1	0.6401	1.276		1	Hapmap47738-BTA-79246	2	1	DOM	7/4	141/129	0.5473		1	Hapmap47738-BTA-79246	2	1	REC	1/10	26/244	1
1	ARS-BFGL-BAC-12579	39724349	1	0.2273	0.4742	2	0.02809	0.3262		1	ARS-BFGL-BAC-12579	1	2	DOM	5/6	192/79	0.09347		1	ARS-BFGL-BAC-12579	1	2	REC	0/11	65/206	0.07379
1	BovineHD0100011299	39791496	2	0.5	0.3996	1	0.3799	1.502		1	BovineHD0100011299	2	1	DOM	8/3	172/97	0.7514		1	BovineHD0100011299	2	1	REC	3/8	43/226	0.397
1	Hapmap27571-BTA-123885	39883372	1	0.1364	0.3463	2	0.06288	0.2981		1	Hapmap27571-BTA-123885	1	2	DOM	2/9	154/116	0.01341		1	Hapmap27571-BTA-123885	1	2	REC	1/10	33/237	1
1	ARS-BFGL-NGS-107020	39954780	1	0.3182	0.2362	2	0.4431	1.509		1	ARS-BFGL-NGS-107020	1	2	DOM	5/6	110/161	0.7628		1	ARS-BFGL-NGS-107020	1	2	REC	2/9	18/253	0.1787
1	BovineHD0100011370	39999162	1	0.3636	0.4608	2	0.393	0.6686		1	BovineHD0100011370	1	2	DOM	7/4	187/81	0.7404		1	BovineHD0100011370	1	2	REC	1/10	60/208	0.4656
1	BovineHD0100011377	40023410	2	0.6364	0.468	1	0.1325	1.989		1	BovineHD0100011377	2	1	DOM	10/1	192/74	0.2985		1	BovineHD0100011377	2	1	REC	4/7	57/209	0.2661
1	BTB-00018760	40036006	2	0.4091	0.3413	1	0.5012	1.336		1	BTB-00018760	2	1	DOM	7/4	153/118	0.7618		1	BTB-00018760	2	1	REC	2/9	32/239	0.628
1	Hapmap38790-BTA-87413	40075624	2	0.4545	0.4176	1	0.8264	1.162		1	Hapmap38790-BTA-87413	2	1	DOM	9/2	175/92	0.3435		1	Hapmap38790-BTA-87413	2	1	REC	1/10	48/219	0.6954
1	BovineHD0100011399	40135823	1	0.3636	0.1805	2	0.04648	2.595		1	BovineHD0100011399	1	2	DOM	6/5	86/180	0.1879		1	BovineHD0100011399	1	2	REC	2/9	10/256	0.07618
1	ARS-BFGL-BAC-13195	40136994	1	0.1364	0.07963	2	0.4126	1.825		1	ARS-BFGL-BAC-13195	1	2	DOM	3/8	41/229	0.3869		1	ARS-BFGL-BAC-13195	1	2	REC	0/11	2/268	1
1	BTB-01806368	40162427	1	0.3636	0.4244	2	0.663	0.7752		1	BTB-01806368	1	2	DOM	6/5	175/96	0.5307		1	BTB-01806368	1	2	REC	2/9	55/216	1
1	ARS-BFGL-NGS-34353	40189561	2	0.2727	0.163	1	0.2368	1.926		1	ARS-BFGL-NGS-34353	2	1	DOM	5/6	80/190	0.3168		1	ARS-BFGL-NGS-34353	2	1	REC	1/10	8/262	0.3056
1	BTB-00018513	40216456	2	0.1364	0.07963	1	0.4126	1.825		1	BTB-00018513	2	1	DOM	3/8	41/229	0.3869		1	BTB-00018513	2	1	REC	0/11	2/268	1
1	ARS-BFGL-NGS-20360	40253747	1	0.2273	0.07778	2	0.02936	3.487		1	ARS-BFGL-NGS-20360	1	2	DOM	5/6	40/230	0.01855		1	ARS-BFGL-NGS-20360	1	2	REC	0/11	2/268	1
1	BTB-00018431	40278698	1	0.5909	0.4889	2	0.3899	1.51		1	BTB-00018431	1	2	DOM	9/2	196/75	0.7328		1	BTB-00018431	1	2	REC	4/7	69/202	0.4832
1	BTB-00018408	40296142	1	0.1818	0.1845	2	1	0.9822		1	BTB-00018408	1	2	DOM	4/7	88/183	0.753		1	BTB-00018408	1	2	REC	0/11	12/259	1
1	BTB-01249999	40420207	2	0.3182	0.3266	1	1	0.9623		1	BTB-01249999	2	1	DOM	5/6	149/122	0.5539		1	BTB-01249999	2	1	REC	2/9	28/243	0.3303
1	BTA-117821-no-rs	40452500	2	0.2727	0.2731	1	1	0.9983		1	BTA-117821-no-rs	2	1	DOM	6/5	133/138	0.7672		1	BTA-117821-no-rs	2	1	REC	0/11	15/256	1
1	BovineHD0100011469	40467149	2	0.4091	0.4267	1	1	0.9302		1	BovineHD0100011469	2	1	DOM	7/4	185/81	0.7414		1	BovineHD0100011469	2	1	REC	2/9	42/224	0.6885
1	BTB-01250106	40506922	2	0.4091	0.2678	1	0.1493	1.893		1	BTB-01250106	2	1	DOM	8/3	126/141	0.1267		1	BTB-01250106	2	1	REC	1/10	17/250	0.5278
1	ARS-BFGL-NGS-86662	40576723	1	0.5	0.4779	2	1	1.093		1	ARS-BFGL-NGS-86662	1	2	DOM	8/3	196/75	1		1	ARS-BFGL-NGS-86662	1	2	REC	3/8	63/208	0.7229
1	ARS-BFGL-BAC-13216	40629765	2	0.4091	0.4613	1	0.6689	0.8086		1	ARS-BFGL-BAC-13216	2	1	DOM	8/3	185/86	1		1	ARS-BFGL-BAC-13216	2	1	REC	1/10	65/206	0.4672
1	BovineHD0100011507	40652007	2	0.1364	0.04699	1	0.09333	3.202		1	BovineHD0100011507	2	1	DOM	2/9	23/243	0.2604		1	BovineHD0100011507	2	1	REC	1/10	2/264	0.1149
1	ARS-BFGL-NGS-23908	40691521	2	0.09091	0.05224	1	0.3339	1.814		1	ARS-BFGL-NGS-23908	2	1	DOM	2/9	27/241	0.3197		1	ARS-BFGL-NGS-23908	2	1	REC	0/11	1/267	1
1	BTB-01250420	40721810	1	0.1364	0.04244	2	0.07472	3.563		1	BTB-01250420	1	2	DOM	2/9	21/250	0.2231		1	BTB-01250420	1	2	REC	1/10	2/269	0.1129
1	BovineHD0100011523	40725446	2	0.2727	0.3472	1	0.6477	0.7052		1	BovineHD0100011523	2	1	DOM	5/6	153/112	0.5374		1	BovineHD0100011523	2	1	REC	1/10	31/234	1
1	Hapmap45471-BTA-117823	40748287	1	0.5	0.4797	2	1	1.085		1	Hapmap45471-BTA-117823	1	2	DOM	7/4	191/80	0.7377		1	Hapmap45471-BTA-117823	1	2	REC	4/7	69/202	0.4832
1	BTB-01250478	40763708	2	0.3182	0.297	1	0.815	1.104		1	BTB-01250478	2	1	DOM	5/6	131/140	1		1	BTB-01250478	2	1	REC	2/9	30/241	0.3609
1	ARS-BFGL-NGS-111921	40795725	2	0.1818	0.3247	1	0.242	0.4621		1	ARS-BFGL-NGS-111921	2	1	DOM	4/7	145/126	0.3588		1	ARS-BFGL-NGS-111921	2	1	REC	0/11	31/240	0.6166
1	BovineHD0100011535	40811598	2	0.1818	0.3307	1	0.1687	0.4497		1	BovineHD0100011535	2	1	DOM	4/7	139/118	0.3565		1	BovineHD0100011535	2	1	REC	0/11	31/226	0.622
1	BTB-01952363	40834252	2	0.3182	0.2768	1	0.6347	1.22		1	BTB-01952363	2	1	DOM	6/5	132/139	0.7658		1	BTB-01952363	2	1	REC	1/10	18/253	0.5424
1	BTA-111731-no-rs	40864128	2	0	0.0369	1	1	0		1	BTA-111731-no-rs	2	1	DOM	0/11	20/251	1		1	BTA-111731-no-rs	2	1	REC	0/11	0/271	1
1	ARS-BFGL-NGS-32825	40909078	1	0.3182	0.2749	2	0.6327	1.231		1	ARS-BFGL-NGS-32825	1	2	DOM	6/5	125/146	0.7597		1	ARS-BFGL-NGS-32825	1	2	REC	1/10	24/247	1
1	BTB-01462455	40956637	2	0	0.04815	1	0.6162	0		1	BTB-01462455	2	1	DOM	0/11	26/244	0.6069		1	BTB-01462455	2	1	REC	0/11	0/270	1
1	Hapmap34927-BES7_Contig453_1164	40987746	2	0.2273	0.2	1	0.786	1.176		1	Hapmap34927-BES7_Contig453_1164	2	1	DOM	4/7	94/176	1		1	Hapmap34927-BES7_Contig453_1164	2	1	REC	1/10	14/256	0.4592
1	Hapmap38709-BTA-88324	41023006	2	0.1364	0.1439	1	1	0.9393		1	Hapmap38709-BTA-88324	2	1	DOM	3/8	74/197	1		1	Hapmap38709-BTA-88324	2	1	REC	0/11	4/267	1
1	ARS-BFGL-NGS-100232	41088436	2	0.2273	0.19	1	0.5898	1.254		1	ARS-BFGL-NGS-100232	2	1	DOM	4/7	90/181	1		1	ARS-BFGL-NGS-100232	2	1	REC	1/10	13/258	0.4348
1	BTB-01555269	41160880	2	0.2273	0.3801	1	0.1803	0.4797		1	BTB-01555269	2	1	DOM	5/6	162/109	0.3644		1	BTB-01555269	2	1	REC	0/11	44/227	0.2235
1	BovineHD0100046971	41184151	1	0.4545	0.3542	2	0.3677	1.52		1	BovineHD0100046971	1	2	DOM	9/2	145/119	0.1196		1	BovineHD0100046971	1	2	REC	1/10	42/222	1
1	BTB-01555328	41196178	2	0.2727	0.4185	1	0.1926	0.521		1	BTB-01555328	2	1	DOM	5/6	175/95	0.2106		1	BTB-01555328	2	1	REC	1/10	51/219	0.6955
1	BovineHD0100011631	41216415	2	0.3636	0.4771	1	0.3845	0.6263		1	BovineHD0100011631	2	1	DOM	7/4	185/77	0.7371		1	BovineHD0100011631	2	1	REC	1/10	65/197	0.4702
1	ARS-BFGL-NGS-45335	41245618	2	0.2727	0.4262	1	0.1885	0.5049		1	ARS-BFGL-NGS-45335	2	1	DOM	5/6	178/93	0.2021		1	ARS-BFGL-NGS-45335	2	1	REC	1/10	53/218	0.6966
1	BTB-01135685	41366993	2	0.1818	0.1624	1	0.7698	1.146		1	BTB-01135685	2	1	DOM	4/7	77/194	0.5183		1	BTB-01135685	2	1	REC	0/11	11/260	1
1	BovineHD0100011712	41428053	1	0.2727	0.2688	2	1	1.02		1	BovineHD0100011712	1	2	DOM	5/6	120/146	1		1	BovineHD0100011712	1	2	REC	1/10	23/243	1
1	BTB-01135743	41433644	2	0.2273	0.2278	1	1	0.9971		1	BTB-01135743	2	1	DOM	5/6	107/163	0.7586		1	BTB-01135743	2	1	REC	0/11	16/254	1
1	Hapmap23514-BTA-150593	41455680	2	0.3182	0.1494	1	0.06335	2.656		1	Hapmap23514-BTA-150593	2	1	DOM	7/4	72/199	0.01298		1	Hapmap23514-BTA-150593	2	1	REC	0/11	9/262	1
1	Hapmap47786-BTA-95575	41562654	1	0.09091	0.1255	2	1	0.6971		1	Hapmap47786-BTA-95575	1	2	DOM	2/9	64/207	1		1	Hapmap47786-BTA-95575	1	2	REC	0/11	4/267	1
1	BovineHD0100011755	41586998	1	0.2727	0.2688	2	1	1.02		1	BovineHD0100011755	1	2	DOM	6/5	119/147	0.5515		1	BovineHD0100011755	1	2	REC	0/11	24/242	0.6068
1	BovineHD0100011761	41618997	2	0.3636	0.3371	1	0.82	1.124		1	BovineHD0100011761	2	1	DOM	6/5	144/120	1		1	BovineHD0100011761	2	1	REC	2/9	34/230	0.6418
1	BovineHD0100011765	41632942	2	0.1818	0.2124	1	1	0.8242		1	BovineHD0100011765	2	1	DOM	4/7	99/160	1		1	BovineHD0100011765	2	1	REC	0/11	11/248	1
1	BovineHD0100011774	41670410	1	0.4545	0.392	2	0.6572	1.292		1	BovineHD0100011774	1	2	DOM	8/3	163/101	0.5425		1	BovineHD0100011774	1	2	REC	2/9	44/220	1
1	BTA-95584-no-rs	41686185	1	0.1818	0.203	2	1	0.8727		1	BTA-95584-no-rs	1	2	DOM	3/8	97/174	0.7517		1	BTA-95584-no-rs	1	2	REC	1/10	13/258	0.4348
1	BovineHD0100011786	41728692	1	0.4545	0.3477	2	0.3629	1.563		1	BovineHD0100011786	1	2	DOM	8/3	149/117	0.3595		1	BovineHD0100011786	1	2	REC	2/9	36/230	0.6514
1	Hapmap38486-BTA-30602	41750066	1	0.5	0.4207	2	0.5127	1.377		1	Hapmap38486-BTA-30602	1	2	DOM	9/2	181/90	0.5127		1	Hapmap38486-BTA-30602	1	2	REC	2/9	47/224	1
1	BovineHD0100011799	41770783	1	0.4091	0.3914	2	1	1.077		1	BovineHD0100011799	1	2	DOM	7/4	169/98	1		1	BovineHD0100011799	1	2	REC	2/9	40/227	0.6747
1	Hapmap38103-BTA-28646	41788052	2	0.2727	0.2159	1	0.5973	1.362		1	Hapmap38103-BTA-28646	2	1	DOM	6/5	107/164	0.3573		1	Hapmap38103-BTA-28646	2	1	REC	0/11	10/261	1
1	BTB-01848824	41835927	1	0.4091	0.3432	2	0.5033	1.325		1	BTB-01848824	1	2	DOM	8/3	149/122	0.3562		1	BTB-01848824	1	2	REC	1/10	37/234	1
1	BTA-122159-no-rs	41860729	1	0.3182	0.3967	2	0.5124	0.7098		1	BTA-122159-no-rs	1	2	DOM	7/4	169/102	1		1	BTA-122159-no-rs	1	2	REC	0/11	46/225	0.2212
1	BTB-01136210	41886688	1	0.1364	0.1328	2	1	1.031		1	BTB-01136210	1	2	DOM	3/8	70/201	1		1	BTB-01136210	1	2	REC	0/11	2/269	1
1	BovineHD0100011834	41905455	2	0.3182	0.4377	1	0.3802	0.5994		1	BovineHD0100011834	2	1	DOM	6/5	186/79	0.3185		1	BovineHD0100011834	2	1	REC	1/10	46/219	0.6964
1	BovineHD0100011840	41922668	2	0.2273	0.2774	1	0.8082	0.7663		1	BovineHD0100011840	2	1	DOM	5/6	127/138	1		1	BovineHD0100011840	2	1	REC	0/11	20/245	1
1	ARS-BFGL-NGS-106725	41948372	2	0.1818	0.3229	1	0.2417	0.466		1	ARS-BFGL-NGS-106725	2	1	DOM	4/7	153/118	0.2246		1	ARS-BFGL-NGS-106725	2	1	REC	0/11	22/249	1
1	BovineHD0100011849	41949404	1	0.6364	0.4889	2	0.197	1.829		1	BovineHD0100011849	1	2	DOM	10/1	203/68	0.3046		1	BovineHD0100011849	1	2	REC	4/7	62/209	0.2907
1	Hapmap54599-rs29019617	41978469	2	0.3636	0.3778	1	1	0.9412		1	Hapmap54599-rs29019617	2	1	DOM	6/5	160/110	0.7635		1	Hapmap54599-rs29019617	2	1	REC	2/9	44/226	0.6974
1	ARS-BFGL-NGS-23369	42009799	1	0.2727	0.321	2	0.8163	0.7931		1	ARS-BFGL-NGS-23369	1	2	DOM	6/5	145/126	1		1	ARS-BFGL-NGS-23369	1	2	REC	0/11	29/242	0.6111
1	1_41754173	42125330	2	0.2727	0.3472	1	0.6477	0.7052		1	1_41754173	2	1	DOM	6/5	147/118	1		1	1_41754173	2	1	REC	0/11	37/228	0.3699
1	1_41768691	42139849	2	0.09091	0.1326	1	0.7547	0.6543		1	1_41768691	2	1	DOM	2/9	65/199	1		1	1_41768691	2	1	REC	0/11	5/259	1
1	Hapmap48210-BTA-120730	42205645	2	0.3636	0.3727	1	1	0.9618		1	Hapmap48210-BTA-120730	2	1	DOM	7/4	160/111	1		1	Hapmap48210-BTA-120730	2	1	REC	1/10	42/229	1
1	BovineHD0100011951	42217977	1	0.3182	0.3044	2	1	1.066		1	BovineHD0100011951	1	2	DOM	6/5	142/129	1		1	BovineHD0100011951	1	2	REC	1/10	23/248	1
1	ARS-BFGL-NGS-106432	42264448	2	0.5455	0.4022	1	0.191	1.783		1	ARS-BFGL-NGS-106432	2	1	DOM	9/2	171/100	0.3378		1	ARS-BFGL-NGS-106432	2	1	REC	3/8	47/224	0.4182
1	ARS-BFGL-BAC-15157	42285326	2	0.4545	0.31	1	0.1644	1.855		1	ARS-BFGL-BAC-15157	2	1	DOM	8/3	138/133	0.2206		1	ARS-BFGL-BAC-15157	2	1	REC	2/9	30/241	0.3609
1	Hapmap50812-BTA-89669	42347846	1	0.3636	0.2362	2	0.2019	1.848		1	Hapmap50812-BTA-89669	1	2	DOM	6/5	114/157	0.5368		1	Hapmap50812-BTA-89669	1	2	REC	2/9	14/257	0.1231
1	1_41998867	42370137	2	0.6364	0.4436	1	0.08346	2.195		1	1_41998867	2	1	DOM	10/1	181/85	0.1815		1	1_41998867	2	1	REC	4/7	55/211	0.2551
1	BTB-01708786	42513439	2	0.6364	0.3967	1	0.02817	2.662		1	BTB-01708786	2	1	DOM	10/1	165/106	0.05662		1	BTB-01708786	2	1	REC	4/7	50/221	0.2307
1	BovineHD0100012074	42562079	2	0.2273	0.4556	1	0.04715	0.3515		1	BovineHD0100012074	2	1	DOM	5/6	192/78	0.09141		1	BovineHD0100012074	2	1	REC	0/11	54/216	0.1311
1	BovineHD0100012062	42600264	1	0.2273	0.126	2	0.1881	2.041		1	BovineHD0100012062	1	2	DOM	4/7	63/199	0.4723		1	BovineHD0100012062	1	2	REC	1/10	3/259	0.1525
1	BTA-104608-no-rs	42672277	2	0.2273	0.203	1	0.7879	1.155		1	BTA-104608-no-rs	2	1	DOM	5/6	99/172	0.5411		1	BTA-104608-no-rs	2	1	REC	0/11	11/260	1
1	ARS-BFGL-NGS-93346	42776430	1	0.2727	0.2424	2	0.8001	1.172		1	ARS-BFGL-NGS-93346	1	2	DOM	6/5	113/151	0.5396		1	ARS-BFGL-NGS-93346	1	2	REC	0/11	15/249	1
1	BovineHD0100012112	42827966	1	0.5	0.382	2	0.2726	1.618		1	BovineHD0100012112	1	2	DOM	8/3	166/101	0.5452		1	BovineHD0100012112	1	2	REC	3/8	38/229	0.2106
1	BTB-00019582	42863111	1	0.1364	0.3985	2	0.01336	0.2383		1	BTB-00019582	1	2	DOM	3/8	169/102	0.0265		1	BTB-00019582	1	2	REC	0/11	47/224	0.2207
1	ARS-BFGL-NGS-10059	42912279	1	0.2273	0.2085	2	0.7918	1.117		1	ARS-BFGL-NGS-10059	1	2	DOM	5/6	101/170	0.7522		1	ARS-BFGL-NGS-10059	1	2	REC	0/11	12/259	1
1	Hapmap53820-rs29010070	42990139	1	0.3182	0.1513	2	0.06469	2.618		1	Hapmap53820-rs29010070	1	2	DOM	5/6	79/192	0.3126		1	Hapmap53820-rs29010070	1	2	REC	2/9	3/268	0.01301
1	BovineHD0100012163	43053603	1	0.09091	0.08555	2	1	1.069		1	BovineHD0100012163	1	2	DOM	2/9	44/219	1		1	BovineHD0100012163	1	2	REC	0/11	1/262	1
1	BovineHD0100012167	43077482	1	0.3636	0.375	2	1	0.9524		1	BovineHD0100012167	1	2	DOM	6/5	162/98	0.7528		1	BovineHD0100012167	1	2	REC	2/9	33/227	0.6392
1	BovineHD0100012169	43080767	1	0.1818	0.1734	2	1	1.059		1	BovineHD0100012169	1	2	DOM	4/7	86/185	0.7483		1	BovineHD0100012169	1	2	REC	0/11	8/263	1
1	BTB-00019705	43090697	1	0.3182	0.3266	2	1	0.9623		1	BTB-00019705	1	2	DOM	6/5	148/123	1		1	BTB-00019705	1	2	REC	1/10	29/242	1
1	BovineHD0100012176	43101882	2	0.09091	0.2432	1	0.1259	0.3111		1	BovineHD0100012176	2	1	DOM	2/9	110/149	0.1296		1	BovineHD0100012176	2	1	REC	0/11	16/243	1
1	ARS-BFGL-NGS-106220	43119017	1	0.04545	0.1015	2	0.7136	0.4216		1	ARS-BFGL-NGS-106220	1	2	DOM	1/10	53/218	0.6966		1	ARS-BFGL-NGS-106220	1	2	REC	0/11	2/269	1
1	BovineHD0100012187	43129718	1	0.3636	0.4385	2	0.5199	0.7318		1	BovineHD0100012187	1	2	DOM	7/4	177/83	0.7493		1	BovineHD0100012187	1	2	REC	1/10	51/209	0.6964
1	BovineHD0100012213	43188983	2	0.5909	0.4636	1	0.2792	1.671		1	BovineHD0100012213	2	1	DOM	9/2	188/73	0.7327		1	BovineHD0100012213	2	1	REC	4/7	54/207	0.2553
1	ARS-BFGL-NGS-12781	43211702	1	0.09091	0.1808	2	0.3973	0.4531		1	ARS-BFGL-NGS-12781	1	2	DOM	2/9	89/182	0.512		1	ARS-BFGL-NGS-12781	1	2	REC	0/11	9/262	1
1	BovineHD0100012223	43219861	2	0.1818	0.1605	1	0.768	1.162		1	BovineHD0100012223	2	1	DOM	4/7	79/192	0.7365		1	BovineHD0100012223	2	1	REC	0/11	8/263	1
1	Hapmap60973-rs29018366	43258943	2	0.5	0.3838	1	0.2747	1.606		1	Hapmap60973-rs29018366	2	1	DOM	8/3	169/102	0.7518		1	Hapmap60973-rs29018366	2	1	REC	3/8	39/232	0.2151
1	BovineHD0100012243	43299897	1	0.3182	0.1502	2	0.06387	2.641		1	BovineHD0100012243	1	2	DOM	5/6	70/193	0.1792		1	BovineHD0100012243	1	2	REC	2/9	9/254	0.06618
1	BovineHD0100012247	43320196	1	0.04545	0.107	2	0.718	0.3974		1	BovineHD0100012247	1	2	DOM	1/10	52/219	0.6959		1	BovineHD0100012247	1	2	REC	0/11	6/265	1
1	BTA-89691-no-rs	43390633	1	0.09091	0.01852	2	0.07615	5.3		1	BTA-89691-no-rs	1	2	DOM	2/9	10/260	0.07426		1	BTA-89691-no-rs	1	2	REC	0/11	0/270	1
1	BTB-00019912	43428471	1	0.2727	0.2657	2	1	1.036		1	BTB-00019912	1	2	DOM	4/7	129/142	0.5482		1	BTB-00019912	1	2	REC	2/9	15/256	0.1365
1	Hapmap46502-BTA-89692	43454408	1	0.3636	0.3764	2	1	0.9468		1	Hapmap46502-BTA-89692	1	2	DOM	7/4	164/107	1		1	Hapmap46502-BTA-89692	1	2	REC	1/10	40/231	1
1	BovineHD0100012280	43511030	1	0.3182	0.3454	2	1	0.8843		1	BovineHD0100012280	1	2	DOM	7/4	147/115	0.7609		1	BovineHD0100012280	1	2	REC	0/11	34/228	0.3695
1	BovineHD0100012296	43581024	2	0.4091	0.4981	1	0.5155	0.6975		1	BovineHD0100012296	2	1	DOM	6/5	202/65	0.1515		1	BovineHD0100012296	2	1	REC	3/8	64/203	0.7296
1	BTA-20952-no-rs	43637189	2	0.5909	0.4723	1	0.2865	1.614		1	BTA-20952-no-rs	2	1	DOM	8/3	200/71	1		1	BTA-20952-no-rs	2	1	REC	5/6	56/215	0.06398
1	BTA-89708-no-rs	43658641	2	0.2727	0.2878	1	1	0.9279		1	BTA-89708-no-rs	2	1	DOM	5/6	140/131	0.7645		1	BTA-89708-no-rs	2	1	REC	1/10	16/255	0.5018
1	BovineHD0100012322	43678256	2	0.3182	0.3745	1	0.659	0.7793		1	BovineHD0100012322	2	1	DOM	6/5	162/105	0.7574		1	BovineHD0100012322	2	1	REC	1/10	38/229	1
1	Hapmap47773-BTA-89713	43709324	2	0.2273	0.2804	1	0.8085	0.7546		1	Hapmap47773-BTA-89713	2	1	DOM	5/6	127/144	1		1	Hapmap47773-BTA-89713	2	1	REC	0/11	25/246	0.6067
1	BovineHD0100012336	43726634	1	0.2727	0.3042	2	1	0.8578		1	BovineHD0100012336	1	2	DOM	5/6	128/135	1		1	BovineHD0100012336	1	2	REC	1/10	32/231	1
1	BovineHD0100012344	43740582	1	0.3182	0.3467	2	1	0.8792		1	BovineHD0100012344	1	2	DOM	6/5	155/106	0.7628		1	BovineHD0100012344	1	2	REC	1/10	26/235	1
1	BovineHD0100012362	43774210	2	0.4545	0.2376	1	0.039	2.673		1	BovineHD0100012362	2	1	DOM	8/3	105/158	0.0557		1	BovineHD0100012362	2	1	REC	2/9	20/243	0.2177
1	BTB-00020638	43787631	2	0.04545	0.1181	1	0.4963	0.3557		1	BTB-00020638	2	1	DOM	1/10	60/211	0.4661		1	BTB-00020638	2	1	REC	0/11	4/267	1
1	BTB-00020648	43810175	1	0.1364	0.155	2	1	0.8609		1	BTB-00020648	1	2	DOM	3/8	80/191	1		1	BTB-00020648	1	2	REC	0/11	4/267	1
1	BTA-89719-no-rs	43831502	2	0.3182	0.3782	1	0.6578	0.7672		1	BTA-89719-no-rs	2	1	DOM	7/4	166/105	1		1	BTA-89719-no-rs	2	1	REC	0/11	39/232	0.3716
1	BovineHD0100012401	43874971	2	0.4545	0.4485	1	1	1.025		1	BovineHD0100012401	2	1	DOM	8/3	181/81	1		1	BovineHD0100012401	2	1	REC	2/9	54/208	1
1	BovineHD0100012402	43881377	1	0.4545	0.3288	2	0.2504	1.701		1	BovineHD0100012402	1	2	DOM	8/3	145/112	0.3612		1	BovineHD0100012402	1	2	REC	2/9	24/233	0.2896
1	BovineHD0100012406	43897459	2	0.2273	0.2302	1	1	0.9836		1	BovineHD0100012406	2	1	DOM	4/7	109/156	1		1	BovineHD0100012406	2	1	REC	1/10	13/252	0.4421
1	ARS-BFGL-NGS-19097	43901606	2	0.3636	0.3708	1	1	0.9694		1	ARS-BFGL-NGS-19097	2	1	DOM	6/5	167/104	0.7545		1	ARS-BFGL-NGS-19097	2	1	REC	2/9	34/237	0.6373
1	ARS-BFGL-NGS-106743	43925940	2	0.2727	0.2657	1	1	1.036		1	ARS-BFGL-NGS-106743	2	1	DOM	5/6	119/152	1		1	ARS-BFGL-NGS-106743	2	1	REC	1/10	25/246	1
1	BovineHD0100012410	43926615	1	0.4545	0.4446	2	1	1.041		1	BovineHD0100012410	1	2	DOM	7/4	184/87	0.7506		1	BovineHD0100012410	1	2	REC	3/8	57/214	0.7061
1	BovineHD0100012427	43970492	2	0.3636	0.2575	1	0.3208	1.648		1	BovineHD0100012427	2	1	DOM	6/5	115/151	0.5417		1	BovineHD0100012427	2	1	REC	2/9	22/244	0.2448
1	BovineHD0100012450	44010211	2	0.3636	0.3925	1	0.8281	0.8846		1	BovineHD0100012450	2	1	DOM	7/4	164/101	1		1	BovineHD0100012450	2	1	REC	1/10	44/221	1
1	ARS-BFGL-NGS-96886	44050867	2	0.1818	0.1926	1	1	0.9316		1	ARS-BFGL-NGS-96886	2	1	DOM	4/7	91/179	1		1	ARS-BFGL-NGS-96886	2	1	REC	0/11	13/257	1
1	Hapmap49368-BTA-89726	44091302	1	0.2273	0.1944	2	0.7832	1.218		1	Hapmap49368-BTA-89726	1	2	DOM	5/6	94/176	0.5259		1	Hapmap49368-BTA-89726	1	2	REC	0/11	11/259	1
1	ARS-BFGL-NGS-116079	44217537	2	0.3182	0.2509	1	0.4604	1.393		1	ARS-BFGL-NGS-116079	2	1	DOM	6/5	117/154	0.5415		1	ARS-BFGL-NGS-116079	2	1	REC	1/10	19/252	0.5615
1	BovineHD0100012506	44229618	2	0.3182	0.4421	1	0.2804	0.5889		1	BovineHD0100012506	2	1	DOM	6/5	176/83	0.3454		1	BovineHD0100012506	2	1	REC	1/10	53/206	0.6991
1	ARS-BFGL-NGS-118317	44288613	2	0.6364	0.3911	1	0.02632	2.724		1	ARS-BFGL-NGS-118317	2	1	DOM	10/1	174/97	0.104		1	ARS-BFGL-NGS-118317	2	1	REC	4/7	38/233	0.06408
1	BovineHD0100012535	44326918	1	0.3636	0.3444	2	0.8229	1.088		1	BovineHD0100012535	1	2	DOM	6/5	145/112	1		1	BovineHD0100012535	1	2	REC	2/9	32/225	0.6359
1	BovineHD0100012544	44359646	2	0.3636	0.3817	1	1	0.9257		1	BovineHD0100012544	2	1	DOM	6/5	159/103	0.7573		1	BovineHD0100012544	2	1	REC	2/9	41/221	0.6861
1	Hapmap43396-BTA-89742	44375152	1	0.04545	0.0369	2	0.573	1.243		1	Hapmap43396-BTA-89742	1	2	DOM	1/10	20/251	0.5799		1	Hapmap43396-BTA-89742	1	2	REC	0/11	0/271	1
1	BovineHD0100012553	44389663	2	0.1818	0.1811	1	1	1.005		1	BovineHD0100012553	2	1	DOM	3/8	86/179	1		1	BovineHD0100012553	2	1	REC	1/10	10/255	0.3661
1	BovineHD0100012560	44422846	2	0.5455	0.4963	1	0.6706	1.218		1	BovineHD0100012560	2	1	DOM	9/2	201/70	0.7349		1	BovineHD0100012560	2	1	REC	3/8	68/203	1
1	ARS-BFGL-NGS-57355	44475537	1	0.09091	0.06273	2	0.6443	1.494		1	ARS-BFGL-NGS-57355	1	2	DOM	2/9	31/240	0.6238		1	ARS-BFGL-NGS-57355	1	2	REC	0/11	3/268	1
1	BTB-00021247	44499948	1	0.09091	0.02052	2	0.08899	4.773		1	BTB-00021247	1	2	DOM	2/9	11/257	0.08696		1	BTB-00021247	1	2	REC	0/11	0/268	1
1	BovineHD0100012597	44555369	2	0.1364	0.06844	1	0.2007	2.149		1	BovineHD0100012597	2	1	DOM	3/8	35/228	0.1843		1	BovineHD0100012597	2	1	REC	0/11	1/262	1
1	BTB-01788892	44802416	1	0.1364	0.1642	2	1	0.8037		1	BTB-01788892	1	2	DOM	3/8	81/190	1		1	BTB-01788892	1	2	REC	0/11	8/263	1
1	BovineHD0100046983	44983356	1	0.09091	0.08209	2	0.7011	1.118		1	BovineHD0100046983	1	2	DOM	2/9	43/225	0.693		1	BovineHD0100046983	1	2	REC	0/11	1/267	1
1	BovineHD0100012940	45007205	1	0.4091	0.4151	2	1	0.9755		1	BovineHD0100012940	1	2	DOM	7/4	176/89	1		1	BovineHD0100012940	1	2	REC	2/9	44/221	1
1	ARS-BFGL-NGS-75951	45042284	2	0.04545	0.0572	1	1	0.7849		1	ARS-BFGL-NGS-75951	2	1	DOM	1/10	30/241	1		1	ARS-BFGL-NGS-75951	2	1	REC	0/11	1/270	1
1	BovineHD0100012946	45042921	2	0.3636	0.3769	1	1	0.9448		1	BovineHD0100012946	2	1	DOM	7/4	163/105	1		1	BovineHD0100012946	2	1	REC	1/10	39/229	1
1	ARS-BFGL-NGS-31349	45090218	2	0.09091	0.09594	1	1	0.9423		1	ARS-BFGL-NGS-31349	2	1	DOM	2/9	50/221	1		1	ARS-BFGL-NGS-31349	2	1	REC	0/11	2/269	1
1	BovineHD0100012963	45105866	2	0.5909	0.39	1	0.0748	2.26		1	BovineHD0100012963	2	1	DOM	9/2	158/101	0.2143		1	BovineHD0100012963	2	1	REC	4/7	44/215	0.1111
1	BovineHD0100012974	45146168	2	0.2273	0.2749	1	0.8081	0.7758		1	BovineHD0100012974	2	1	DOM	5/6	131/140	1		1	BovineHD0100012974	2	1	REC	0/11	18/253	1
1	BovineHD0100012982	45171571	2	0.1364	0.3638	1	0.03836	0.2761		1	BovineHD0100012982	2	1	DOM	3/8	157/111	0.05918		1	BovineHD0100012982	2	1	REC	0/11	38/230	0.3707
1	BTB-01462206	45182041	1	0.04545	0.05166	2	1	0.8741		1	BTB-01462206	1	2	DOM	1/10	28/243	1		1	BTB-01462206	1	2	REC	0/11	0/271	1
1	BTB-01462237	45213341	2	0.2273	0.441	1	0.05058	0.3729		1	BTB-01462237	2	1	DOM	5/6	184/87	0.1869		1	BTB-01462237	2	1	REC	0/11	55/216	0.13
1	BovineHD0100012997	45224996	2	0.6364	0.4792	1	0.1918	1.902		1	BovineHD0100012997	2	1	DOM	9/2	195/70	0.7336		1	BovineHD0100012997	2	1	REC	5/6	59/206	0.135
1	ARS-BFGL-NGS-68706	45236542	1	0.4091	0.4556	2	0.8277	0.8274		1	ARS-BFGL-NGS-68706	1	2	DOM	7/4	188/82	0.7411		1	ARS-BFGL-NGS-68706	1	2	REC	2/9	58/212	1
1	ARS-BFGL-NGS-113748	45259100	1	0.2273	0.3727	2	0.1841	0.495		1	ARS-BFGL-NGS-113748	1	2	DOM	4/7	164/107	0.1263		1	ARS-BFGL-NGS-113748	1	2	REC	1/10	38/233	1
1	Hapmap38803-BTA-104250	45281490	1	0.1364	0.1199	2	0.7398	1.159		1	Hapmap38803-BTA-104250	1	2	DOM	3/8	61/210	0.7166		1	Hapmap38803-BTA-104250	1	2	REC	0/11	4/267	1
1	ARS-BFGL-NGS-119382	45324731	1	0.4091	0.3782	2	0.8241	1.138		1	ARS-BFGL-NGS-119382	1	2	DOM	8/3	159/112	0.5338		1	ARS-BFGL-NGS-119382	1	2	REC	1/10	46/225	0.6976
1	BTB-00478386	45350130	1	0.5	0.3185	2	0.102	2.14		1	BTB-00478386	1	2	DOM	8/3	138/132	0.2213		1	BTB-00478386	1	2	REC	3/8	34/236	0.1643
1	BTB-00478374	45379246	1	0.2273	0.3204	2	0.4846	0.6239		1	BTB-00478374	1	2	DOM	4/7	142/128	0.3632		1	BTB-00478374	1	2	REC	1/10	31/239	1
1	BovineHD0100013052	45386077	1	0.3636	0.3941	2	0.8277	0.8787		1	BovineHD0100013052	1	2	DOM	7/4	166/103	1		1	BovineHD0100013052	1	2	REC	1/10	46/223	0.6972
1	ARS-BFGL-NGS-10512	45458660	2	0.5455	0.4779	1	0.6644	1.311		1	ARS-BFGL-NGS-10512	2	1	DOM	9/2	193/78	0.7338		1	ARS-BFGL-NGS-10512	2	1	REC	3/8	66/205	0.7335
1	BovineHD0100013081	45476204	1	0.3636	0.3769	2	1	0.9447		1	BovineHD0100013081	1	2	DOM	8/3	160/104	0.5372		1	BovineHD0100013081	1	2	REC	0/11	39/225	0.3733
1	BovineHD0100013084	45484321	2	0.09091	0.1468	1	0.756	0.581		1	BovineHD0100013084	2	1	DOM	2/9	70/199	0.7344		1	BovineHD0100013084	2	1	REC	0/11	9/260	1
1	BTA-90373-no-rs	45519346	1	0.3182	0.2214	2	0.2996	1.641		1	BTA-90373-no-rs	1	2	DOM	7/4	105/166	0.1207		1	BTA-90373-no-rs	1	2	REC	0/11	15/256	1
1	BovineHD0100013097	45544351	1	0.3182	0.2548	2	0.4663	1.365		1	BovineHD0100013097	1	2	DOM	6/5	115/148	0.5445		1	BovineHD0100013097	1	2	REC	1/10	19/244	0.5726
1	ARS-BFGL-NGS-34687	45555607	2	0.4091	0.4207	1	1	0.9534		1	ARS-BFGL-NGS-34687	2	1	DOM	8/3	176/95	0.7528		1	ARS-BFGL-NGS-34687	2	1	REC	1/10	52/219	0.6959
1	BovineHD0100013102	45563997	2	0.4545	0.4356	1	1	1.08		1	BovineHD0100013102	2	1	DOM	8/3	174/90	0.755		1	BovineHD0100013102	2	1	REC	2/9	56/208	1
1	BTB-01461996	45612781	2	0.6818	0.4539	1	0.04811	2.578		1	BTB-01461996	2	1	DOM	10/1	190/81	0.1852		1	BTB-01461996	2	1	REC	5/6	56/215	0.06398
1	BTA-10863-rs29016414	45773590	2	0.09091	0.04059	1	0.2394	2.364		1	BTA-10863-rs29016414	2	1	DOM	2/9	22/249	0.2383		1	BTA-10863-rs29016414	2	1	REC	0/11	0/271	1
1	BTA-95262-no-rs	45793675	2	0.3182	0.1181	1	0.0134	3.485		1	BTA-95262-no-rs	2	1	DOM	6/5	58/213	0.01946		1	BTA-95262-no-rs	2	1	REC	1/10	6/265	0.2454
1	BTB-01786029	45848413	2	0.2727	0.2435	1	0.8006	1.165		1	BTB-01786029	2	1	DOM	6/5	112/159	0.5349		1	BTB-01786029	2	1	REC	0/11	20/251	1
1	BTA-14361-rs29023125	45897874	1	0.09091	0.04059	2	0.2394	2.364		1	BTA-14361-rs29023125	1	2	DOM	2/9	22/249	0.2383		1	BTA-14361-rs29023125	1	2	REC	0/11	0/271	1
1	ARS-BFGL-NGS-114234	45929427	1	0.1818	0.2019	2	1	0.8787		1	ARS-BFGL-NGS-114234	1	2	DOM	4/7	94/176	1		1	ARS-BFGL-NGS-114234	1	2	REC	0/11	15/255	1
1	BTA-89820-no-rs	45967602	2	0.2273	0.452	1	0.04762	0.3565		1	BTA-89820-no-rs	2	1	DOM	5/6	184/87	0.1869		1	BTA-89820-no-rs	2	1	REC	0/11	61/210	0.1288
1	Hapmap60140-ss46526251	46016435	2	0.1818	0.2056	1	1	0.8589		1	Hapmap60140-ss46526251	2	1	DOM	4/7	96/174	1		1	Hapmap60140-ss46526251	2	1	REC	0/11	15/255	1
1	BovineHD0100013189	46035686	1	0.1818	0.2034	2	1	0.8702		1	BovineHD0100013189	1	2	DOM	4/7	92/171	1		1	BovineHD0100013189	1	2	REC	0/11	15/248	1
1	UA-IFASA-4106	46048751	2	0.2273	0.4576	1	0.047	0.3487		1	UA-IFASA-4106	2	1	DOM	5/6	187/84	0.1108		1	UA-IFASA-4106	2	1	REC	0/11	61/210	0.1288
1	BovineHD0100013198	46078837	2	0.1818	0.2056	1	1	0.8589		1	BovineHD0100013198	2	1	DOM	4/7	95/175	1		1	BovineHD0100013198	2	1	REC	0/11	16/254	1
1	BTB-00468553	46082337	2	0.09091	0.04059	1	0.2394	2.364		1	BTB-00468553	2	1	DOM	2/9	22/249	0.2383		1	BTB-00468553	2	1	REC	0/11	0/271	1
1	BovineHD0100013203	46103884	1	0.04545	0.06506	2	1	0.6844		1	BovineHD0100013203	1	2	DOM	1/10	35/234	1		1	BovineHD0100013203	1	2	REC	0/11	0/269	1
1	BovineHD0100013207	46124747	2	0.2727	0.4349	1	0.1865	0.4872		1	BovineHD0100013207	2	1	DOM	6/5	181/88	0.5144		1	BovineHD0100013207	2	1	REC	0/11	53/216	0.1324
1	BTB-00468519	46202802	2	0.4091	0.1734	1	0.009806	3.3		1	BTB-00468519	2	1	DOM	7/4	85/186	0.04337		1	BTB-00468519	2	1	REC	2/9	9/262	0.06283
1	ARS-BFGL-NGS-110320	46242001	1	0.3182	0.3574	2	0.8224	0.839		1	ARS-BFGL-NGS-110320	1	2	DOM	7/4	158/112	1		1	ARS-BFGL-NGS-110320	1	2	REC	0/11	35/235	0.3698
1	ARS-BFGL-NGS-67684	46267521	2	0.2273	0.2823	1	0.8088	0.7478		1	ARS-BFGL-NGS-67684	2	1	DOM	5/6	128/143	1		1	ARS-BFGL-NGS-67684	2	1	REC	0/11	25/246	0.6067
1	BTB-00468485	46294957	2	0.3182	0.1218	1	0.0156	3.366		1	BTB-00468485	2	1	DOM	6/5	60/211	0.02271		1	BTB-00468485	2	1	REC	1/10	6/265	0.2454
1	BTB-00468476	46322462	1	0.4545	0.3376	2	0.2602	1.635		1	BTB-00468476	1	2	DOM	8/3	152/119	0.3599		1	BTB-00468476	1	2	REC	2/9	31/240	0.6238
1	BTB-01608930	46425212	1	0.5909	0.3875	2	0.07386	2.284		1	BTB-01608930	1	2	DOM	9/2	169/102	0.3387		1	BTB-01608930	1	2	REC	4/7	41/230	0.07984
1	BovineHD0100013284	46452563	1	0.3636	0.4721	2	0.3861	0.6389		1	BovineHD0100013284	1	2	DOM	6/5	190/79	0.3144		1	BovineHD0100013284	1	2	REC	2/9	64/205	1
1	BovineHD0100013290	46480170	2	0.4545	0.3309	1	0.2525	1.685		1	BovineHD0100013290	2	1	DOM	8/3	149/120	0.3572		1	BovineHD0100013290	2	1	REC	2/9	29/240	0.349
1	BTA-109011-no-rs	46575158	2	0.2727	0.2196	1	0.6003	1.333		1	BTA-109011-no-rs	2	1	DOM	6/5	102/169	0.3441		1	BTA-109011-no-rs	2	1	REC	0/11	17/254	1
1	Hapmap39710-BTA-108633	46659142	1	0.3182	0.3727	2	0.6599	0.7855		1	Hapmap39710-BTA-108633	1	2	DOM	7/4	164/107	1		1	Hapmap39710-BTA-108633	1	2	REC	0/11	38/233	0.3703
1	Hapmap54262-rs29018839	46735327	2	0.5	0.3829	1	0.2737	1.612		1	Hapmap54262-rs29018839	2	1	DOM	8/3	169/100	0.7514		1	Hapmap54262-rs29018839	2	1	REC	3/8	37/232	0.1967
1	ARS-BFGL-NGS-41577	46756027	1	0.04545	0.05904	2	1	0.7589		1	ARS-BFGL-NGS-41577	1	2	DOM	1/10	29/242	1		1	ARS-BFGL-NGS-41577	1	2	REC	0/11	3/268	1
1	BovineHD0100013379	46834727	2	0.3636	0.2193	1	0.121	2.034		1	BovineHD0100013379	2	1	DOM	6/5	105/164	0.3534		1	BovineHD0100013379	2	1	REC	2/9	13/256	0.1114
1	ARS-BFGL-NGS-23106	46884964	2	0.04545	0.02399	1	0.4309	1.938		1	ARS-BFGL-NGS-23106	2	1	DOM	1/10	12/259	0.4107		1	ARS-BFGL-NGS-23106	2	1	REC	0/11	1/270	1
1	BovineHD0100013407	46922216	1	0.5909	0.4796	2	0.3853	1.568		1	BovineHD0100013407	1	2	DOM	9/2	191/78	0.7342		1	BovineHD0100013407	1	2	REC	4/7	67/202	0.4784
1	BTA-99040-no-rs	46953687	2	0.09091	0.02583	1	0.1253	3.771		1	BTA-99040-no-rs	2	1	DOM	2/9	14/257	0.1231		1	BTA-99040-no-rs	2	1	REC	0/11	0/271	1
1	BovineHD0100013416	46963727	1	0.4091	0.3144	2	0.3567	1.51		1	BovineHD0100013416	1	2	DOM	8/3	136/128	0.2229		1	BovineHD0100013416	1	2	REC	1/10	30/234	1
1	ARS-BFGL-BAC-24524	47022790	2	0.2727	0.2675	1	1	1.027		1	ARS-BFGL-BAC-24524	2	1	DOM	5/6	122/149	1		1	ARS-BFGL-BAC-24524	2	1	REC	1/10	23/248	1
1	Hapmap55429-rs29012753	47050759	2	0.3182	0.2934	1	0.8132	1.124		1	Hapmap55429-rs29012753	2	1	DOM	6/5	133/138	0.7672		1	Hapmap55429-rs29012753	2	1	REC	1/10	26/245	1
1	BTB-02090792	47079462	2	0.4091	0.3007	1	0.3441	1.61		1	BTB-02090792	2	1	DOM	7/4	136/135	0.5411		1	BTB-02090792	2	1	REC	2/9	27/244	0.3149
1	BTB-01702372	47112713	2	0.09091	0.06273	1	0.6443	1.494		1	BTB-01702372	2	1	DOM	2/9	31/240	0.6238		1	BTB-01702372	2	1	REC	0/11	3/268	1
1	BTB-01572184	47157644	1	0.3182	0.1993	2	0.1804	1.875		1	BTB-01572184	1	2	DOM	6/5	96/175	0.2132		1	BTB-01572184	1	2	REC	1/10	12/259	0.4107
1	Hapmap43751-BTA-104783	47185588	2	0.09091	0.1052	1	1	0.8509		1	Hapmap43751-BTA-104783	2	1	DOM	2/9	55/216	1		1	Hapmap43751-BTA-104783	2	1	REC	0/11	2/269	1
1	BovineHD0100013469	47216446	2	0.09091	0.1648	1	0.555	0.5067		1	BovineHD0100013469	2	1	DOM	2/9	85/185	0.5119		1	BovineHD0100013469	2	1	REC	0/11	4/266	1
1	BTB-01967977	47302352	2	0.3182	0.2232	1	0.3025	1.624		1	BTB-01967977	2	1	DOM	5/6	110/161	0.7628		1	BTB-01967977	2	1	REC	2/9	11/260	0.08534
1	BTB-01663516	47334486	2	0.1818	0.1074	1	0.2889	1.847		1	BTB-01663516	2	1	DOM	3/8	54/216	0.4707		1	BTB-01663516	2	1	REC	1/10	4/266	0.1822
1	BovineHD0100013497	47357605	1	0.1818	0.3759	2	0.07299	0.3689		1	BovineHD0100013497	1	2	DOM	4/7	161/109	0.2095		1	BovineHD0100013497	1	2	REC	0/11	42/228	0.3794
1	Hapmap42068-BTA-111564	47378821	1	0.4091	0.1863	2	0.02292	3.023		1	Hapmap42068-BTA-111564	1	2	DOM	7/4	93/178	0.05748		1	Hapmap42068-BTA-111564	1	2	REC	2/9	8/263	0.05253
1	BTB-01202368	47421211	1	0.2727	0.2841	2	1	0.9448		1	BTB-01202368	1	2	DOM	6/5	132/139	0.7658		1	BTB-01202368	1	2	REC	0/11	22/249	1
1	BTB-01202377	47439819	2	0.1818	0.3672	1	0.1106	0.383		1	BTB-01202377	2	1	DOM	4/7	161/110	0.21		1	BTB-01202377	2	1	REC	0/11	38/233	0.3703
1	BTA-122400-no-rs	47465147	2	0.2727	0.4889	1	0.05181	0.392		1	BTA-122400-no-rs	2	1	DOM	5/6	198/73	0.07906		1	BTA-122400-no-rs	2	1	REC	1/10	67/204	0.4701
1	Hapmap60003-rs29024905	47489244	2	0.5455	0.2934	1	0.0169	2.891		1	Hapmap60003-rs29024905	2	1	DOM	8/3	134/137	0.2174		1	Hapmap60003-rs29024905	2	1	REC	4/7	25/246	0.01803
1	BTB-01202460	47578457	2	0.2273	0.2694	1	0.8084	0.7977		1	BTB-01202460	2	1	DOM	5/6	123/148	1		1	BTB-01202460	2	1	REC	0/11	23/248	0.6085
1	BovineHD0100013544	47593505	2	0.09091	0.1296	1	1	0.6714		1	BovineHD0100013544	2	1	DOM	2/9	66/204	1		1	BovineHD0100013544	2	1	REC	0/11	4/266	1
1	Hapmap27230-BTA-162491	47606699	2	0.4091	0.4871	1	0.52	0.729		1	Hapmap27230-BTA-162491	2	1	DOM	8/3	202/69	1		1	Hapmap27230-BTA-162491	2	1	REC	1/10	62/209	0.4654
1	ARS-BFGL-NGS-105365	47660239	1	0	0.07011	2	0.3881	0		1	ARS-BFGL-NGS-105365	1	2	DOM	0/11	37/234	0.3695		1	ARS-BFGL-NGS-105365	1	2	REC	0/11	1/270	1
1	ARS-BFGL-NGS-73983	47740633	2	0.7273	0.4705	1	0.02742	3.001		1	ARS-BFGL-NGS-73983	2	1	DOM	10/1	187/84	0.1821		1	ARS-BFGL-NGS-73983	2	1	REC	6/5	68/203	0.03979
1	ARS-BFGL-BAC-16973	47765383	2	0.5909	0.393	1	0.07635	2.231		1	ARS-BFGL-BAC-16973	2	1	DOM	9/2	171/100	0.3378		1	ARS-BFGL-BAC-16973	2	1	REC	4/7	42/229	0.08553
1	Hapmap49948-BTA-29490	47815773	1	0.1818	0.1181	2	0.3238	1.66		1	Hapmap49948-BTA-29490	1	2	DOM	3/8	60/211	0.7137		1	Hapmap49948-BTA-29490	1	2	REC	1/10	4/267	0.1816
1	ARS-BFGL-NGS-50906	47982861	1	0.2273	0.3229	2	0.4847	0.6168		1	ARS-BFGL-NGS-50906	1	2	DOM	5/6	144/127	0.7608		1	ARS-BFGL-NGS-50906	1	2	REC	0/11	31/240	0.6166
1	BovineHD0100013667	48012415	1	0	0.05283	2	0.6192	0		1	BovineHD0100013667	1	2	DOM	0/11	28/237	0.6101		1	BovineHD0100013667	1	2	REC	0/11	0/265	1
1	Hapmap59092-rs29024583	48061029	2	0.1364	0.1808	1	0.7799	0.7154		1	Hapmap59092-rs29024583	2	1	DOM	3/8	89/182	1		1	Hapmap59092-rs29024583	2	1	REC	0/11	9/262	1
1	BovineHD0100013692	48117247	1	0.2273	0.1513	2	0.362	1.65		1	BovineHD0100013692	1	2	DOM	4/7	76/195	0.5131		1	BovineHD0100013692	1	2	REC	1/10	6/265	0.2454
1	ARS-BFGL-NGS-41264	48157004	2	0	0.03321	1	1	0		1	ARS-BFGL-NGS-41264	2	1	DOM	0/11	18/253	1		1	ARS-BFGL-NGS-41264	2	1	REC	0/11	0/271	1
1	Hapmap38806-BTA-110152	48263748	2	0.1364	0.1074	1	0.7223	1.312		1	Hapmap38806-BTA-110152	2	1	DOM	3/8	56/214	0.7043		1	Hapmap38806-BTA-110152	2	1	REC	0/11	2/268	1
1	BovineHD0100013736	48268016	2	0.1364	0.1222	1	0.7436	1.134		1	BovineHD0100013736	2	1	DOM	3/8	63/207	0.7237		1	BovineHD0100013736	2	1	REC	0/11	3/267	1
1	BTB-01146938	48360337	1	0.5455	0.3444	2	0.0677	2.284		1	BTB-01146938	1	2	DOM	9/2	150/120	0.1212		1	BTB-01146938	1	2	REC	3/8	36/234	0.1847
1	BovineHD0100013762	48425332	2	0.1364	0.1623	1	1	0.8152		1	BovineHD0100013762	2	1	DOM	3/8	77/188	1		1	BovineHD0100013762	2	1	REC	0/11	9/256	1
1	BTB-01146838	48436492	1	0.3636	0.369	2	1	0.9771		1	BTB-01146838	1	2	DOM	7/4	165/106	1		1	BTB-01146838	1	2	REC	1/10	35/236	1
1	Hapmap50572-BTA-113037	48500613	1	0.5455	0.4317	2	0.3809	1.579		1	Hapmap50572-BTA-113037	1	2	DOM	7/4	176/95	1		1	Hapmap50572-BTA-113037	1	2	REC	5/6	58/213	0.07246
1	ARS-BFGL-NGS-83459	48538897	2	0.2273	0.1328	1	0.2054	1.92		1	ARS-BFGL-NGS-83459	2	1	DOM	4/7	67/204	0.477		1	ARS-BFGL-NGS-83459	2	1	REC	1/10	5/266	0.2141
1	BovineHD0100013844	48713582	1	0.1818	0.4204	2	0.02731	0.3064		1	BovineHD0100013844	1	2	DOM	4/7	173/97	0.1064		1	BovineHD0100013844	1	2	REC	0/11	54/216	0.1311
1	BovineHD0100013846	48715780	1	0.1818	0.4204	2	0.02731	0.3064		1	BovineHD0100013846	1	2	DOM	4/7	173/97	0.1064		1	BovineHD0100013846	1	2	REC	0/11	54/216	0.1311
1	BovineHD0100013848	48724388	2	0.1364	0.4264	1	0.007022	0.2124		1	BovineHD0100013848	2	1	DOM	3/8	172/93	0.02059		1	BovineHD0100013848	2	1	REC	0/11	54/211	0.1296
1	BovineHD0100013866	48752114	1	0.6364	0.3947	2	0.02748	2.683		1	BovineHD0100013866	1	2	DOM	9/2	162/104	0.214		1	BovineHD0100013866	1	2	REC	5/6	48/218	0.03917
1	BovineHD0100013867	48755603	2	0.3636	0.1283	1	0.005712	3.882		1	BovineHD0100013867	2	1	DOM	6/5	61/204	0.02718		1	BovineHD0100013867	2	1	REC	2/9	7/258	0.04469
1	BTA-113021-no-rs	48823158	1	0.4091	0.4667	2	0.6666	0.7912		1	BTA-113021-no-rs	1	2	DOM	9/2	192/78	0.734		1	BTA-113021-no-rs	1	2	REC	0/11	60/210	0.1282
1	BovineHD0100013906	48843312	1	0.4091	0.2224	2	0.0654	2.42		1	BovineHD0100013906	1	2	DOM	7/4	98/165	0.1116		1	BovineHD0100013906	1	2	REC	2/9	19/244	0.2024
1	BTB-01077379	48869448	2	0.4091	0.4244	1	1	0.9391		1	BTB-01077379	2	1	DOM	9/2	178/93	0.3443		1	BTB-01077379	2	1	REC	0/11	52/219	0.2257
1	BovineHD0100013920	48904277	1	0.2273	0.4436	2	0.04964	0.3689		1	BovineHD0100013920	1	2	DOM	5/6	180/86	0.1879		1	BovineHD0100013920	1	2	REC	0/11	56/210	0.1281
1	BTB-01077277	48906977	2	0.2273	0.437	1	0.07653	0.3789		1	BTB-01077277	2	1	DOM	5/6	180/90	0.1942		1	BTB-01077277	2	1	REC	0/11	56/214	0.1288
1	Hapmap57446-rs29023998	48981871	2	0	0.03148	1	1	0		1	Hapmap57446-rs29023998	2	1	DOM	0/11	17/253	1		1	Hapmap57446-rs29023998	2	1	REC	0/11	0/270	1
1	BovineHD0100013943	49011657	2	0.2727	0.5	1	0.04873	0.375		1	BovineHD0100013943	2	1	DOM	6/5	195/73	0.1883		1	BovineHD0100013943	2	1	REC	0/11	73/195	0.07229
1	BTB-01615915	49314301	1	0.4091	0.2657	2	0.1465	1.913		1	BTB-01615915	1	2	DOM	8/3	123/148	0.1203		1	BTB-01615915	1	2	REC	1/10	21/250	0.5976
1	BovineHD0100014023	49415050	1	0.4091	0.4347	2	1	0.9003		1	BovineHD0100014023	1	2	DOM	8/3	185/83	1		1	BovineHD0100014023	1	2	REC	1/10	48/220	0.6955
1	BovineHD0100014048	49515972	2	0.3636	0.2857	1	0.4727	1.429		1	BovineHD0100014048	2	1	DOM	6/5	129/137	0.765		1	BovineHD0100014048	2	1	REC	2/9	23/243	0.2604
1	BovineHD0100014053	49537293	2	0.2273	0.1491	1	0.3579	1.679		1	BovineHD0100014053	2	1	DOM	4/7	71/194	0.4971		1	BovineHD0100014053	2	1	REC	1/10	8/257	0.3103
1	BovineHD0100014063	49597814	2	0.2727	0.2519	1	0.8048	1.114		1	BovineHD0100014063	2	1	DOM	6/5	118/150	0.5465		1	BovineHD0100014063	2	1	REC	0/11	17/251	1
1	BovineHD0100014071	49634079	2	0.1364	0.1748	1	0.7809	0.7453		1	BovineHD0100014071	2	1	DOM	3/8	84/182	1		1	BovineHD0100014071	2	1	REC	0/11	9/257	1
1	BTB-00132601	49688088	1	0.2273	0.1926	2	0.7825	1.233		1	BTB-00132601	1	2	DOM	5/6	94/176	0.5259		1	BTB-00132601	1	2	REC	0/11	10/260	1
1	BovineHD0100014103	49728052	1	0.2273	0.1623	2	0.3859	1.518		1	BovineHD0100014103	1	2	DOM	5/6	80/185	0.3223		1	BovineHD0100014103	1	2	REC	0/11	6/259	1
1	ARS-BFGL-NGS-38261	49729236	2	0.4545	0.3537	1	0.3674	1.523		1	ARS-BFGL-NGS-38261	2	1	DOM	7/4	159/111	1		1	ARS-BFGL-NGS-38261	2	1	REC	3/8	32/238	0.1448
1	ARS-BFGL-BAC-15402	49762136	1	0.2727	0.19	2	0.4052	1.598		1	ARS-BFGL-BAC-15402	1	2	DOM	5/6	94/177	0.525		1	ARS-BFGL-BAC-15402	1	2	REC	1/10	9/262	0.3327
1	BTB-00132817	49799340	1	0.4545	0.3537	2	0.3674	1.523		1	BTB-00132817	1	2	DOM	7/4	159/111	1		1	BTB-00132817	1	2	REC	3/8	32/238	0.1448
1	BTB-01699628	49829799	2	0.2273	0.163	1	0.3877	1.511		1	BTB-01699628	2	1	DOM	5/6	82/188	0.3243		1	BTB-01699628	2	1	REC	0/11	6/264	1
1	BTA-114651-no-rs	49851536	2	0.5909	0.417	1	0.125	2.02		1	BTA-114651-no-rs	2	1	DOM	9/2	181/90	0.5127		1	BTA-114651-no-rs	2	1	REC	4/7	45/226	0.1039
1	Hapmap41715-BTA-100026	49919784	2	0.3182	0.1511	1	0.06456	2.621		1	Hapmap41715-BTA-100026	2	1	DOM	6/5	77/191	0.09022		1	Hapmap41715-BTA-100026	2	1	REC	1/10	4/264	0.1834
1	BTB-00022097	50009545	2	0.1818	0.1771	1	1	1.032		1	BTB-00022097	2	1	DOM	3/8	89/182	1		1	BTB-00022097	2	1	REC	1/10	7/264	0.2756
1	BTB-01165120	50064432	1	0.1818	0.1241	2	0.5063	1.569		1	BTB-01165120	1	2	DOM	3/8	64/202	0.7305		1	BTB-01165120	1	2	REC	1/10	2/264	0.1149
1	Hapmap49829-BTA-101896	50173554	2	0.3182	0.3463	1	1	0.8809		1	Hapmap49829-BTA-101896	2	1	DOM	6/5	154/116	1		1	Hapmap49829-BTA-101896	2	1	REC	1/10	33/237	1
1	BovineHD0100014237	50241095	2	0.2273	0.08083	1	0.03373	3.345		1	BovineHD0100014237	2	1	DOM	4/7	42/224	0.09035		1	BovineHD0100014237	2	1	REC	1/10	1/265	0.07798
1	BTB-01164952	50252416	1	0.1364	0.06111	2	0.1605	2.426		1	BTB-01164952	1	2	DOM	3/8	33/237	0.1545		1	BTB-01164952	1	2	REC	0/11	0/270	1
1	BTB-01164946	50279694	2	0.5455	0.4704	1	0.5204	1.351		1	BTB-01164946	2	1	DOM	8/3	191/79	1		1	BTB-01164946	2	1	REC	4/7	63/207	0.2993
1	BTB-01164879	50375545	2	0.09091	0.09815	1	1	0.9189		1	BTB-01164879	2	1	DOM	2/9	49/221	1		1	BTB-01164879	2	1	REC	0/11	4/266	1
1	BTB-00022352	50415732	1	0.2273	0.1074	2	0.08796	2.444		1	BTB-00022352	1	2	DOM	3/8	53/217	0.4627		1	BTB-00022352	1	2	REC	2/9	5/265	0.02634
1	BovineHD0100014288	50443160	1	0.5	0.4111	2	0.5087	1.432		1	BovineHD0100014288	1	2	DOM	8/3	171/99	0.7512		1	BovineHD0100014288	1	2	REC	3/8	51/219	0.4472
1	BTB-00022376	50457230	1	0.04545	0.07963	2	1	0.5504		1	BTB-00022376	1	2	DOM	1/10	41/229	1		1	BTB-00022376	1	2	REC	0/11	2/268	1
1	Hapmap41716-BTA-100042	50484660	1	0.3636	0.2823	2	0.4702	1.453		1	Hapmap41716-BTA-100042	1	2	DOM	6/5	132/139	0.7658		1	Hapmap41716-BTA-100042	1	2	REC	2/9	21/250	0.2231
1	BovineHD0100014306	50493683	2	0.3636	0.2906	1	0.4774	1.395		1	BovineHD0100014306	2	1	DOM	6/5	133/132	1		1	BovineHD0100014306	2	1	REC	2/9	21/244	0.2307
1	BovineHD0100014307	50494779	2	0.3636	0.2822	1	0.4699	1.453		1	BovineHD0100014307	2	1	DOM	6/5	128/136	0.7649		1	BovineHD0100014307	2	1	REC	2/9	21/243	0.2319
1	ARS-BFGL-NGS-101533	50631100	2	0.4545	0.4	1	0.6602	1.25		1	ARS-BFGL-NGS-101533	2	1	DOM	9/2	165/105	0.2151		1	ARS-BFGL-NGS-101533	2	1	REC	1/10	51/219	0.6955
1	BovineHD0100014362	50665945	2	0.5	0.3667	1	0.2602	1.727		1	BovineHD0100014362	2	1	DOM	8/3	154/116	0.3651		1	BovineHD0100014362	2	1	REC	3/8	44/226	0.4014
1	ARS-BFGL-NGS-6521	50767507	2	0.09091	0.02778	1	0.1395	3.5		1	ARS-BFGL-NGS-6521	2	1	DOM	2/9	15/255	0.1373		1	ARS-BFGL-NGS-6521	2	1	REC	0/11	0/270	1
1	ARS-BFGL-NGS-14638	50809694	2	0.09091	0.09142	1	1	0.9939		1	ARS-BFGL-NGS-14638	2	1	DOM	2/9	47/221	1		1	ARS-BFGL-NGS-14638	2	1	REC	0/11	2/266	1
1	Hapmap42747-BTA-97910	50856429	2	0.4091	0.3303	1	0.4909	1.404		1	Hapmap42747-BTA-97910	2	1	DOM	6/5	151/120	1		1	Hapmap42747-BTA-97910	2	1	REC	3/8	28/243	0.108
1	BTB-00184675	50886644	2	0.2727	0.2332	1	0.6157	1.233		1	BTB-00184675	2	1	DOM	5/6	112/156	1		1	BTB-00184675	2	1	REC	1/10	13/255	0.4384
1	ARS-BFGL-NGS-27696	50927543	2	0.09091	0.06852	1	0.6596	1.359		1	ARS-BFGL-NGS-27696	2	1	DOM	2/9	36/234	0.6484		1	ARS-BFGL-NGS-27696	2	1	REC	0/11	1/269	1
1	ARS-BFGL-NGS-15670	50974257	2	0.2727	0.4207	1	0.1912	0.5164		1	ARS-BFGL-NGS-15670	2	1	DOM	6/5	178/93	0.5225		1	ARS-BFGL-NGS-15670	2	1	REC	0/11	50/221	0.2223
1	BovineHD0100014436	50978540	1	0.4091	0.2593	2	0.1391	1.977		1	BovineHD0100014436	1	2	DOM	7/4	116/152	0.2226		1	BovineHD0100014436	1	2	REC	2/9	23/245	0.2576
1	BTB-01661970	51001448	2	0.2727	0.4241	1	0.1894	0.5093		1	BTB-01661970	2	1	DOM	5/6	181/89	0.1916		1	BTB-01661970	2	1	REC	1/10	48/222	0.6957
1	BovineHD0100014490	51157870	1	0.4091	0.5	2	0.5151	0.6923		1	BovineHD0100014490	1	2	DOM	7/4	200/65	0.4755		1	BovineHD0100014490	1	2	REC	2/9	65/200	1
1	ARS-BFGL-NGS-80227	51199296	2	0.4091	0.4982	1	0.5156	0.6974		1	ARS-BFGL-NGS-80227	2	1	DOM	8/3	205/66	0.7335		1	ARS-BFGL-NGS-80227	2	1	REC	1/10	65/206	0.4672
1	BovineHD0100014505	51226374	1	0.4091	0.2387	2	0.07867	2.208		1	BovineHD0100014505	1	2	DOM	7/4	113/153	0.2174		1	BovineHD0100014505	1	2	REC	2/9	14/252	0.1268
1	BTB-01303321	51253635	1	0.1818	0.1241	2	0.5064	1.569		1	BTB-01303321	1	2	DOM	4/7	64/206	0.4705		1	BTB-01303321	1	2	REC	0/11	3/267	1
1	UA-IFASA-6260	51319043	2	0.2273	0.1698	1	0.5614	1.438		1	UA-IFASA-6260	2	1	DOM	4/7	82/186	0.7422		1	UA-IFASA-6260	2	1	REC	1/10	9/259	0.3357
1	Hapmap54644-rs29022483	51443154	1	0.2727	0.2944	2	1	0.8986		1	Hapmap54644-rs29022483	1	2	DOM	6/5	130/140	0.7639		1	Hapmap54644-rs29022483	1	2	REC	0/11	29/241	0.6113
1	BTA-100081-no-rs	51501180	2	0.3636	0.2759	1	0.4665	1.5		1	BTA-100081-no-rs	2	1	DOM	7/4	123/147	0.356		1	BTA-100081-no-rs	2	1	REC	1/10	26/244	1
1	BovineHD0100014595	51600068	2	0.09091	0.109	1	1	0.8172		1	BovineHD0100014595	2	1	DOM	2/9	55/211	1		1	BovineHD0100014595	2	1	REC	0/11	3/263	1
1	BTA-100076-no-rs	51629454	2	0.4545	0.286	1	0.09748	2.081		1	BTA-100076-no-rs	2	1	DOM	7/4	133/138	0.3755		1	BTA-100076-no-rs	2	1	REC	3/8	22/249	0.06319
1	ARS-BFGL-NGS-29536	51674103	1	0.4545	0.3247	2	0.2473	1.733		1	ARS-BFGL-NGS-29536	1	2	DOM	7/4	146/125	0.7592		1	ARS-BFGL-NGS-29536	1	2	REC	3/8	30/241	0.1253
1	ARS-BFGL-NGS-26781	51729431	2	0.2727	0.2037	1	0.4241	1.466		1	ARS-BFGL-NGS-26781	2	1	DOM	6/5	99/171	0.34		1	ARS-BFGL-NGS-26781	2	1	REC	0/11	11/259	1
1	BTA-27925-no-rs	51785197	1	0.4091	0.25	2	0.1311	2.077		1	BTA-27925-no-rs	1	2	DOM	6/5	116/152	0.542		1	BTA-27925-no-rs	1	2	REC	3/8	18/250	0.04107
1	BovineHD0100014666	51793463	1	0.4091	0.3139	2	0.3561	1.513		1	BovineHD0100014666	1	2	DOM	8/3	137/129	0.2229		1	BovineHD0100014666	1	2	REC	1/10	30/236	1
1	Hapmap23148-BTA-123974	51845190	2	0.2727	0.2611	1	1	1.061		1	Hapmap23148-BTA-123974	2	1	DOM	5/6	125/145	1		1	Hapmap23148-BTA-123974	2	1	REC	1/10	16/254	0.5031
1	BovineHD0100014707	51942049	1	0.4091	0.3528	2	0.651	1.27		1	BovineHD0100014707	1	2	DOM	8/3	156/109	0.5337		1	BovineHD0100014707	1	2	REC	1/10	31/234	1
1	BovineHD0100014714	51960243	2	0.1364	0.07008	1	0.2099	2.095		1	BovineHD0100014714	2	1	DOM	3/8	36/228	0.1936		1	BovineHD0100014714	2	1	REC	0/11	1/263	1
1	UA-IFASA-5103	51980212	1	0.5455	0.3616	2	0.1125	2.118		1	UA-IFASA-5103	1	2	DOM	9/2	157/114	0.1322		1	UA-IFASA-5103	1	2	REC	3/8	39/232	0.2151
1	ARS-BFGL-NGS-105123	52001408	1	0.3636	0.2944	2	0.4819	1.369		1	ARS-BFGL-NGS-105123	1	2	DOM	6/5	135/135	1		1	ARS-BFGL-NGS-105123	1	2	REC	2/9	24/246	0.2702
1	ARS-BFGL-NGS-17305	52078062	1	0.09091	0.009328	2	0.02766	10.62		1	ARS-BFGL-NGS-17305	1	2	DOM	2/9	5/263	0.02669		1	ARS-BFGL-NGS-17305	1	2	REC	0/11	0/268	1
1	Hapmap42392-BTA-100065	52121657	1	0.3182	0.213	2	0.2883	1.725		1	Hapmap42392-BTA-100065	1	2	DOM	5/6	102/168	0.7531		1	Hapmap42392-BTA-100065	1	2	REC	2/9	13/257	0.1107
1	ARS-BFGL-NGS-112553	52229363	2	0.1364	0.1333	1	1	1.026		1	ARS-BFGL-NGS-112553	2	1	DOM	3/8	68/202	1		1	ARS-BFGL-NGS-112553	2	1	REC	0/11	4/266	1
1	BTA-100060-no-rs	52260898	1	0.2273	0.2093	2	0.7924	1.111		1	BTA-100060-no-rs	1	2	DOM	5/6	105/165	0.756		1	BTA-100060-no-rs	1	2	REC	0/11	8/262	1
1	BTA-100058-no-rs	52304155	2	0.4545	0.413	1	0.8259	1.185		1	BTA-100058-no-rs	2	1	DOM	7/4	181/89	0.7563		1	BTA-100058-no-rs	2	1	REC	3/8	42/228	0.3913
1	BovineHD0100014814	52357886	1	0.5455	0.3741	2	0.1193	2.008		1	BovineHD0100014814	1	2	DOM	9/2	161/105	0.2124		1	BovineHD0100014814	1	2	REC	3/8	38/228	0.2122
1	BovineHD0100014824	52376933	1	0.2273	0.1093	2	0.09291	2.398		1	BovineHD0100014824	1	2	DOM	5/6	58/212	0.07344		1	BovineHD0100014824	1	2	REC	0/11	1/269	1
1	BTA-120739-no-rs	52386165	2	0.2727	0.2	1	0.418	1.5		1	BTA-120739-no-rs	2	1	DOM	4/7	100/170	1		1	BTA-120739-no-rs	2	1	REC	2/9	8/262	0.05287
1	BovineHD0100014833	52401002	2	0.4091	0.5	1	0.5151	0.6923		1	BovineHD0100014833	2	1	DOM	7/4	201/63	0.4713		1	BovineHD0100014833	2	1	REC	2/9	63/201	1
1	ARS-BFGL-NGS-89588	52418784	2	0.2727	0.2417	1	0.7999	1.177		1	ARS-BFGL-NGS-89588	2	1	DOM	4/7	119/152	0.761		1	ARS-BFGL-NGS-89588	2	1	REC	2/9	12/259	0.09743
1	BTB-00026002	52459222	1	0.2727	0.2232	2	0.6038	1.305		1	BTB-00026002	1	2	DOM	4/7	109/162	1		1	BTB-00026002	1	2	REC	2/9	12/259	0.09743
1	ARS-BFGL-NGS-76469	52536112	1	0.5455	0.4704	2	0.5204	1.351		1	ARS-BFGL-NGS-76469	1	2	DOM	9/2	197/73	0.733		1	ARS-BFGL-NGS-76469	1	2	REC	3/8	57/213	0.7065
1	BovineHD0100014899	52543921	2	0.4091	0.3736	1	0.823	1.161		1	BovineHD0100014899	2	1	DOM	8/3	161/104	0.5378		1	BovineHD0100014899	2	1	REC	1/10	37/228	1
1	BovineHD0100014918	52602161	1	0.5909	0.4179	2	0.1255	2.012		1	BovineHD0100014918	1	2	DOM	11/0	175/93	0.01812		1	BovineHD0100014918	1	2	REC	2/9	49/219	1
1	Hapmap27147-BTA-124015	52668291	1	0.2273	0.2019	2	0.7871	1.163		1	Hapmap27147-BTA-124015	1	2	DOM	5/6	100/170	0.7519		1	Hapmap27147-BTA-124015	1	2	REC	0/11	9/261	1
1	Hapmap24136-BTA-124014	52692977	2	0.5909	0.4815	1	0.3861	1.555		1	Hapmap24136-BTA-124014	2	1	DOM	11/0	200/71	0.07104		1	Hapmap24136-BTA-124014	2	1	REC	2/9	61/210	1
1	BovineHD0100014953	52773325	1	0.4545	0.3806	2	0.5077	1.356		1	BovineHD0100014953	1	2	DOM	7/4	170/98	1		1	BovineHD0100014953	1	2	REC	3/8	34/234	0.167
1	BovineHD0100014988	52848948	1	0.2727	0.265	2	1	1.04		1	BovineHD0100014988	1	2	DOM	5/6	126/140	1		1	BovineHD0100014988	1	2	REC	1/10	15/251	0.4867
1	Hapmap47502-BTA-110302	52854500	2	0.1364	0.1494	1	1	0.8986		1	Hapmap47502-BTA-110302	2	1	DOM	3/8	75/196	1		1	Hapmap47502-BTA-110302	2	1	REC	0/11	6/265	1
1	BovineHD0100014992	52855378	2	0.1364	0.1523	1	1	0.8791		1	BovineHD0100014992	2	1	DOM	3/8	75/191	1		1	BovineHD0100014992	2	1	REC	0/11	6/260	1
1	BovineHD0100015002	52889663	2	0	0.09074	1	0.2446	0		1	BovineHD0100015002	2	1	DOM	0/11	48/222	0.2208		1	BovineHD0100015002	2	1	REC	0/11	1/269	1
1	BTB-00025197	52972214	1	0.4091	0.3537	2	0.6516	1.265		1	BTB-00025197	1	2	DOM	9/2	152/118	0.1236		1	BTB-00025197	1	2	REC	0/11	39/231	0.3718
1	BovineHD0100015037	52999235	1	0	0.09211	2	0.2454	0		1	BovineHD0100015037	1	2	DOM	0/11	48/218	0.2211		1	BovineHD0100015037	1	2	REC	0/11	1/265	1
1	BTB-00025135	53112780	2	0	0.06296	1	0.3881	0		1	BTB-00025135	2	1	DOM	0/11	34/236	0.3709		1	BTB-00025135	2	1	REC	0/11	0/270	1
1	Hapmap47174-BTA-110289	53135919	2	0.1364	0.1185	1	0.7376	1.174		1	Hapmap47174-BTA-110289	2	1	DOM	3/8	63/207	0.7237		1	Hapmap47174-BTA-110289	2	1	REC	0/11	1/269	1
1	BTA-110282-no-rs	53167139	2	0.3182	0.2389	1	0.4455	1.487		1	BTA-110282-no-rs	2	1	DOM	5/6	111/159	0.7654		1	BTA-110282-no-rs	2	1	REC	2/9	18/252	0.1798
1	ARS-BFGL-NGS-18743	53214714	2	0.4091	0.3653	1	0.6592	1.203		1	ARS-BFGL-NGS-18743	2	1	DOM	8/3	161/110	0.5344		1	ARS-BFGL-NGS-18743	2	1	REC	1/10	37/234	1
1	Hapmap53221-rs29019635	53551793	2	0.4091	0.3489	1	0.6495	1.292		1	Hapmap53221-rs29019635	2	1	DOM	8/3	155/113	0.3709		1	Hapmap53221-rs29019635	2	1	REC	1/10	32/236	1
1	Hapmap57738-rs29023662	53578419	2	0.2273	0.1586	1	0.3771	1.561		1	Hapmap57738-rs29023662	2	1	DOM	4/7	77/191	0.7352		1	Hapmap57738-rs29023662	2	1	REC	1/10	8/260	0.3075
1	Hapmap48975-BTA-99363	53615323	2	0.2727	0.2519	1	0.8048	1.114		1	Hapmap48975-BTA-99363	2	1	DOM	5/6	125/145	1		1	Hapmap48975-BTA-99363	2	1	REC	1/10	11/259	0.3868
1	BovineHD0100015213	53617929	2	0.5909	0.4173	1	0.1251	2.017		1	BovineHD0100015213	2	1	DOM	11/0	173/93	0.01808		1	BovineHD0100015213	2	1	REC	2/9	49/217	1
1	ARS-BFGL-BAC-20881	53635724	1	0.4091	0.2926	2	0.2419	1.674		1	ARS-BFGL-BAC-20881	1	2	DOM	8/3	129/141	0.1299		1	ARS-BFGL-BAC-20881	1	2	REC	1/10	29/241	1
1	Hapmap61117-rs29023044	53657839	1	0.2727	0.2722	2	1	1.003		1	Hapmap61117-rs29023044	1	2	DOM	5/6	127/143	1		1	Hapmap61117-rs29023044	1	2	REC	1/10	20/250	0.5813
1	BovineHD0100015234	53682452	2	0.2727	0.2717	1	1	1.005		1	BovineHD0100015234	2	1	DOM	5/6	125/140	1		1	BovineHD0100015234	2	1	REC	1/10	19/246	0.5698
1	BovineHD0100015235	53683724	2	0.2727	0.2632	1	1	1.05		1	BovineHD0100015235	2	1	DOM	5/6	123/143	1		1	BovineHD0100015235	2	1	REC	1/10	17/249	0.5292
1	BovineHD0100015236	53684659	1	0.2727	0.2632	2	1	1.05		1	BovineHD0100015236	1	2	DOM	5/6	123/143	1		1	BovineHD0100015236	1	2	REC	1/10	17/249	0.5292
1	BTB-00026752	53685613	2	0.4091	0.2934	1	0.243	1.668		1	BTB-00026752	2	1	DOM	8/3	130/141	0.1311		1	BTB-00026752	2	1	REC	1/10	29/242	1
1	ARS-BFGL-NGS-106380	53713808	1	0.3636	0.2657	2	0.3295	1.579		1	ARS-BFGL-NGS-106380	1	2	DOM	6/5	125/146	0.7597		1	ARS-BFGL-NGS-106380	1	2	REC	2/9	19/252	0.1934
1	BovineHD0100015260	53749809	2	0.4091	0.344	1	0.6481	1.32		1	BovineHD0100015260	2	1	DOM	8/3	149/117	0.3595		1	BovineHD0100015260	2	1	REC	1/10	34/232	1
1	BovineHD0100015261	53750481	2	0.4545	0.438	1	1	1.069		1	BovineHD0100015261	2	1	DOM	8/3	183/83	1		1	BovineHD0100015261	2	1	REC	2/9	50/216	1
1	BTB-00026585	53760822	1	0	0.03321	2	1	0		1	BTB-00026585	1	2	DOM	0/11	18/253	1		1	BTB-00026585	1	2	REC	0/11	0/271	1
1	BTA-110335-no-rs	53841380	2	0.5	0.393	1	0.3755	1.545		1	BTA-110335-no-rs	2	1	DOM	9/2	167/104	0.2179		1	BTA-110335-no-rs	2	1	REC	2/9	46/225	1
1	Hapmap38807-BTA-110324	53899179	2	0.4091	0.3432	1	0.5033	1.325		1	Hapmap38807-BTA-110324	2	1	DOM	8/3	151/120	0.3584		1	Hapmap38807-BTA-110324	2	1	REC	1/10	35/236	1
1	ARS-BFGL-NGS-40967	53953481	2	0.4091	0.417	1	1	0.968		1	ARS-BFGL-NGS-40967	2	1	DOM	8/3	177/94	0.7535		1	ARS-BFGL-NGS-40967	2	1	REC	1/10	49/222	0.6954
1	Hapmap42092-BTA-119864	54101343	1	0.1364	0.1255	2	0.7492	1.101		1	Hapmap42092-BTA-119864	1	2	DOM	3/8	66/205	0.7335		1	Hapmap42092-BTA-119864	1	2	REC	0/11	2/269	1
1	ARS-BFGL-NGS-114712	54134361	2	0.5455	0.441	1	0.3847	1.521		1	ARS-BFGL-NGS-114712	2	1	DOM	9/2	185/86	0.5116		1	ARS-BFGL-NGS-114712	2	1	REC	3/8	54/217	0.4691
1	BovineHD0100015376	54170162	2	0	0.1426	1	0.05771	0		1	BovineHD0100015376	2	1	DOM	0/11	70/200	0.07094		1	BovineHD0100015376	2	1	REC	0/11	7/263	1
1	Hapmap49009-BTA-107212	54263653	2	0.2273	0.1974	1	0.7846	1.196		1	Hapmap49009-BTA-107212	2	1	DOM	5/6	98/173	0.5374		1	Hapmap49009-BTA-107212	2	1	REC	0/11	9/262	1
1	BovineHD0100015401	54273282	2	0.1364	0.1852	1	0.7799	0.6947		1	BovineHD0100015401	2	1	DOM	2/9	86/184	0.5115		1	BovineHD0100015401	2	1	REC	1/10	14/256	0.4592
1	ARS-BFGL-NGS-43783	54347232	2	0.2273	0.2343	1	1	0.9611		1	ARS-BFGL-NGS-43783	2	1	DOM	3/8	114/157	0.3717		1	ARS-BFGL-NGS-43783	2	1	REC	2/9	13/258	0.11
1	BovineHD0100015437	54394177	1	0.1364	0.145	2	1	0.9312		1	BovineHD0100015437	1	2	DOM	2/9	73/196	0.7329		1	BovineHD0100015437	1	2	REC	1/10	5/264	0.2155
1	BTB-01712147	54417168	2	0.2727	0.3616	1	0.499	0.662		1	BTB-01712147	2	1	DOM	5/6	162/109	0.3644		1	BTB-01712147	2	1	REC	1/10	34/237	1
1	BTB-01315615	54445733	2	0	0.01476	1	1	0		1	BTB-01315615	2	1	DOM	0/11	8/263	1		1	BTB-01315615	2	1	REC	0/11	0/271	1
1	BovineHD0100015457	54450675	2	0.1818	0.1685	1	0.7765	1.096		1	BovineHD0100015457	2	1	DOM	3/8	83/187	1		1	BovineHD0100015457	2	1	REC	1/10	8/262	0.3056
1	BTA-21826-no-rs	54530063	2	0.5	0.4151	1	0.51	1.409		1	BTA-21826-no-rs	2	1	DOM	9/2	176/95	0.3409		1	BTA-21826-no-rs	2	1	REC	2/9	49/222	1
1	ARS-BFGL-NGS-86970	54568552	2	0.2273	0.09779	1	0.06468	2.714		1	ARS-BFGL-NGS-86970	2	1	DOM	4/7	52/219	0.2373		1	ARS-BFGL-NGS-86970	2	1	REC	1/10	1/270	0.07663
1	BTB-01315516	54638306	1	0.1818	0.2232	2	0.797	0.7732		1	BTB-01315516	1	2	DOM	4/7	106/165	1		1	BTB-01315516	1	2	REC	0/11	15/256	1
1	BovineHD0100015507	54652115	2	0.3636	0.3481	1	1	1.07		1	BovineHD0100015507	2	1	DOM	7/4	153/117	0.7623		1	BovineHD0100015507	2	1	REC	1/10	35/235	1
1	Hapmap47540-BTA-21819	54688405	1	0.3182	0.4557	2	0.2748	0.5574		1	Hapmap47540-BTA-21819	1	2	DOM	6/5	189/82	0.3231		1	Hapmap47540-BTA-21819	1	2	REC	1/10	58/213	0.4684
1	Hapmap39813-BTA-21834	54732278	2	0.2727	0.2786	1	1	0.971		1	Hapmap39813-BTA-21834	2	1	DOM	5/6	129/142	1		1	Hapmap39813-BTA-21834	2	1	REC	1/10	22/249	1
1	BTB-01315457	54755430	2	0.2273	0.3173	1	0.4848	0.6327		1	BTB-01315457	2	1	DOM	5/6	148/123	0.557		1	BTB-01315457	2	1	REC	0/11	24/247	0.6072
1	BovineHD0100015543	54797676	1	0.2727	0.3579	2	0.5	0.6727		1	BovineHD0100015543	1	2	DOM	5/6	161/110	0.3683		1	BovineHD0100015543	1	2	REC	1/10	33/238	1
1	Hapmap51652-BTA-89898	54843886	2	0.04545	0.01845	1	0.357	2.533		1	Hapmap51652-BTA-89898	2	1	DOM	1/10	10/261	0.3597		1	Hapmap51652-BTA-89898	2	1	REC	0/11	0/271	1
1	BTB-01131103	54870276	2	0.3182	0.4207	1	0.3849	0.6427		1	BTB-01131103	2	1	DOM	6/5	182/89	0.5149		1	BTB-01131103	2	1	REC	1/10	46/225	0.6976
1	Hapmap49383-BTA-93867	54908193	2	0.2273	0.2574	1	1	0.8485		1	Hapmap49383-BTA-93867	2	1	DOM	4/7	120/150	0.7601		1	Hapmap49383-BTA-93867	2	1	REC	1/10	19/251	0.5629
1	BTB-01131178	54941210	2	0.09091	0.1015	1	1	0.8855		1	BTB-01131178	2	1	DOM	2/9	54/217	1		1	BTB-01131178	2	1	REC	0/11	1/270	1
1	BTA-93863-no-rs	54969062	1	0.4091	0.3852	2	0.8263	1.105		1	BTA-93863-no-rs	1	2	DOM	7/4	167/103	1		1	BTA-93863-no-rs	1	2	REC	2/9	41/229	0.6781
1	ARS-BFGL-BAC-32896	55026335	2	0.4091	0.4201	1	1	0.9558		1	ARS-BFGL-BAC-32896	2	1	DOM	7/4	181/88	0.7546		1	ARS-BFGL-BAC-32896	2	1	REC	2/9	45/224	1
1	Hapmap38361-BTA-93866	55051389	2	0.1818	0.1389	1	0.5331	1.378		1	Hapmap38361-BTA-93866	2	1	DOM	4/7	72/198	0.4956		1	Hapmap38361-BTA-93866	2	1	REC	0/11	3/267	1
1	BTB-01131384	55079792	1	0	0.04982	2	0.617	0		1	BTB-01131384	1	2	DOM	0/11	27/244	0.6077		1	BTB-01131384	1	2	REC	0/11	0/271	1
1	BTB-01914655	55130499	2	0.4091	0.4185	1	1	0.9619		1	BTB-01914655	2	1	DOM	7/4	181/89	0.7563		1	BTB-01914655	2	1	REC	2/9	45/225	1
1	BovineHD0100015649	55258490	1	0.3182	0.4742	2	0.1919	0.5175		1	BovineHD0100015649	1	2	DOM	6/5	199/72	0.1784		1	BovineHD0100015649	1	2	REC	1/10	58/213	0.4684
1	BovineHD0100015656	55291541	1	0.2273	0.137	2	0.2174	1.852		1	BovineHD0100015656	1	2	DOM	4/7	71/199	0.4915		1	BovineHD0100015656	1	2	REC	1/10	3/267	0.1484
1	ARS-BFGL-NGS-115305	55369328	1	0.1364	0.1352	2	1	1.01		1	ARS-BFGL-NGS-115305	1	2	DOM	2/9	67/203	1		1	ARS-BFGL-NGS-115305	1	2	REC	1/10	6/264	0.2462
1	Hapmap32092-BTA-149957	55395795	1	0.3636	0.2989	2	0.4877	1.34		1	Hapmap32092-BTA-149957	1	2	DOM	7/4	139/132	0.5436		1	Hapmap32092-BTA-149957	1	2	REC	1/10	23/248	1
1	ARS-BFGL-NGS-85105	55417768	1	0.5909	0.4686	2	0.2831	1.638		1	ARS-BFGL-NGS-85105	1	2	DOM	10/1	195/76	0.2991		1	ARS-BFGL-NGS-85105	1	2	REC	3/8	59/212	0.711
1	BovineHD0100015703	55476049	1	0.2727	0.3007	2	1	0.8719		1	BovineHD0100015703	1	2	DOM	5/6	140/131	0.7645		1	BovineHD0100015703	1	2	REC	1/10	23/248	1
1	Hapmap47445-BTA-93870	55515620	1	0.4545	0.342	2	0.3602	1.603		1	Hapmap47445-BTA-93870	1	2	DOM	8/3	152/117	0.3619		1	Hapmap47445-BTA-93870	1	2	REC	2/9	32/237	0.629
1	Hapmap33225-BTA-151395	55580815	1	0.1818	0.1771	2	1	1.032		1	Hapmap33225-BTA-151395	1	2	DOM	4/7	88/183	0.753		1	Hapmap33225-BTA-151395	1	2	REC	0/11	8/263	1
1	BovineHD4100000306	55595254	2	0.3636	0.3377	1	0.8203	1.121		1	BovineHD4100000306	2	1	DOM	8/3	146/122	0.3553		1	BovineHD4100000306	2	1	REC	0/11	35/233	0.3695
1	BovineHD0100015754	55616621	2	0.4091	0.4004	1	1	1.037		1	BovineHD0100015754	2	1	DOM	8/3	169/102	0.7518		1	BovineHD0100015754	2	1	REC	1/10	48/223	0.6958
1	ARS-BFGL-NGS-39684	55670650	1	0	0.03321	2	1	0		1	ARS-BFGL-NGS-39684	1	2	DOM	0/11	18/253	1		1	ARS-BFGL-NGS-39684	1	2	REC	0/11	0/271	1
1	Hapmap43173-BTA-120253	55779057	1	0.2727	0.3395	2	0.6477	0.7296		1	Hapmap43173-BTA-120253	1	2	DOM	6/5	157/114	1		1	Hapmap43173-BTA-120253	1	2	REC	0/11	27/244	0.6077
1	BovineHD0100015822	55837262	1	0.4545	0.4963	2	0.8286	0.8458		1	BovineHD0100015822	1	2	DOM	7/4	199/71	0.4915		1	BovineHD0100015822	1	2	REC	3/8	69/201	1
1	BTA-25876-no-rs	56134816	2	0.2727	0.3796	1	0.3741	0.6128		1	BTA-25876-no-rs	2	1	DOM	5/6	164/106	0.3553		1	BTA-25876-no-rs	2	1	REC	1/10	41/229	1
1	BovineHD0100015894	56151365	2	0.4091	0.4428	1	0.8291	0.8712		1	BovineHD0100015894	2	1	DOM	6/5	183/88	0.5136		1	BovineHD0100015894	2	1	REC	3/8	57/214	0.7061
1	ARS-BFGL-NGS-97046	56196281	1	0.4545	0.4317	2	0.8301	1.097		1	ARS-BFGL-NGS-97046	1	2	DOM	6/5	181/90	0.5164		1	ARS-BFGL-NGS-97046	1	2	REC	4/7	53/218	0.2412
1	BTA-25809-no-rs	56253478	2	0.4545	0.4815	1	0.8314	0.8972		1	BTA-25809-no-rs	2	1	DOM	7/4	199/72	0.4945		1	BTA-25809-no-rs	2	1	REC	3/8	62/209	0.7197
1	ARS-BFGL-NGS-38890	56446383	2	0.09091	0.131	1	0.7552	0.6634		1	ARS-BFGL-NGS-38890	2	1	DOM	2/9	67/204	1		1	ARS-BFGL-NGS-38890	2	1	REC	0/11	4/267	1
1	ARS-BFGL-NGS-59270	56483517	2	0.09091	0.1661	1	0.5555	0.5022		1	ARS-BFGL-NGS-59270	2	1	DOM	2/9	82/189	0.5152		1	ARS-BFGL-NGS-59270	2	1	REC	0/11	8/263	1
1	BovineHD0100016081	56504825	1	0.3182	0.3704	2	0.8221	0.7933		1	BovineHD0100016081	1	2	DOM	6/5	163/107	0.7586		1	BovineHD0100016081	1	2	REC	1/10	37/233	1
1	ARS-BFGL-NGS-15221	56564301	1	0	0.01661	2	1	0		1	ARS-BFGL-NGS-15221	1	2	DOM	0/11	9/262	1		1	ARS-BFGL-NGS-15221	1	2	REC	0/11	0/271	1
1	ARS-BFGL-NGS-52696	56632142	1	0.1818	0.1292	2	0.514	1.498		1	ARS-BFGL-NGS-52696	1	2	DOM	3/8	65/206	0.7298		1	ARS-BFGL-NGS-52696	1	2	REC	1/10	5/266	0.2141
1	Hapmap39218-BTA-25795	56722807	1	0.4091	0.3708	2	0.8226	1.175		1	Hapmap39218-BTA-25795	1	2	DOM	7/4	162/109	1		1	Hapmap39218-BTA-25795	1	2	REC	2/9	39/232	0.6649
1	ARS-BFGL-NGS-89	56752229	1	0.2727	0.1981	2	0.4152	1.518		1	ARS-BFGL-NGS-89	1	2	DOM	5/6	100/170	0.7519		1	ARS-BFGL-NGS-89	1	2	REC	1/10	7/263	0.2765
1	UA-IFASA-5597	56790295	1	0.3636	0.4446	2	0.5165	0.7137		1	UA-IFASA-5597	1	2	DOM	7/4	192/79	0.7365		1	UA-IFASA-5597	1	2	REC	1/10	49/222	0.6954
1	ARS-BFGL-NGS-18996	56841984	1	0.5	0.4004	2	0.3805	1.498		1	ARS-BFGL-NGS-18996	1	2	DOM	8/3	173/98	0.7514		1	ARS-BFGL-NGS-18996	1	2	REC	3/8	44/227	0.4006
1	BovineHD0100016232	56873807	1	0.5	0.4611	2	0.8283	1.169		1	BovineHD0100016232	1	2	DOM	8/3	189/81	1		1	BovineHD0100016232	1	2	REC	3/8	60/210	0.7143
1	BovineHD0100016238	56903414	1	0.4091	0.4315	2	1	0.9122		1	BovineHD0100016238	1	2	DOM	7/4	184/86	0.749		1	BovineHD0100016238	1	2	REC	2/9	49/221	1
1	Hapmap59481-rs29019616	56944392	2	0.1364	0.1255	1	0.7492	1.101		1	Hapmap59481-rs29019616	2	1	DOM	3/8	63/208	0.7229		1	Hapmap59481-rs29019616	2	1	REC	0/11	5/266	1
1	BovineHD0100016281	56978092	1	0.5	0.4815	2	1	1.077		1	BovineHD0100016281	1	2	DOM	8/3	207/63	0.7237		1	BovineHD0100016281	1	2	REC	3/8	53/217	0.4627
1	BovineHD0100016287	56995206	2	0.3636	0.2667	1	0.3308	1.571		1	BovineHD0100016287	2	1	DOM	7/4	124/146	0.3569		1	BovineHD0100016287	2	1	REC	1/10	20/250	0.5813
1	BovineHD0100016294	57006702	1	0.3636	0.4022	2	0.8262	0.8493		1	BovineHD0100016294	1	2	DOM	7/4	183/88	0.753		1	BovineHD0100016294	1	2	REC	1/10	35/236	1
1	Hapmap44594-BTA-25389	57029947	2	0.2727	0.2786	1	1	0.971		1	Hapmap44594-BTA-25389	2	1	DOM	5/6	136/135	1		1	Hapmap44594-BTA-25389	2	1	REC	1/10	15/256	0.4803
1	BTA-25403-no-rs	57147119	2	0.2273	0.1347	1	0.2105	1.89		1	BTA-25403-no-rs	2	1	DOM	5/6	67/204	0.1554		1	BTA-25403-no-rs	2	1	REC	0/11	6/265	1
1	ARS-BFGL-NGS-34519	57180246	1	0.09091	0.03321	2	0.1807	2.911		1	ARS-BFGL-NGS-34519	1	2	DOM	2/9	18/253	0.1787		1	ARS-BFGL-NGS-34519	1	2	REC	0/11	0/271	1
1	Hapmap38147-BTA-25404	57217658	2	0.3636	0.3173	1	0.6458	1.229		1	Hapmap38147-BTA-25404	2	1	DOM	6/5	148/123	1		1	Hapmap38147-BTA-25404	2	1	REC	2/9	24/247	0.2688
1	ARS-BFGL-NGS-102073	57249444	1	0.09091	0.0738	2	0.6751	1.255		1	ARS-BFGL-NGS-102073	1	2	DOM	2/9	39/232	0.6649		1	ARS-BFGL-NGS-102073	1	2	REC	0/11	1/270	1
1	BovineHD0100016358	57269695	2	0.2727	0.2204	1	0.601	1.327		1	BovineHD0100016358	2	1	DOM	6/5	101/169	0.343		1	BovineHD0100016358	2	1	REC	0/11	18/252	1
1	Hapmap55498-ss46527080	57309255	1	0.3636	0.3542	2	1	1.042		1	Hapmap55498-ss46527080	1	2	DOM	6/5	158/113	1		1	Hapmap55498-ss46527080	1	2	REC	2/9	34/237	0.6373
1	BovineHD0100016374	57354786	2	0.2727	0.2362	1	0.7981	1.213		1	BovineHD0100016374	2	1	DOM	6/5	107/164	0.3573		1	BovineHD0100016374	2	1	REC	0/11	21/250	1
1	ARS-BFGL-NGS-94399	57399338	2	0.09091	0.1181	1	1	0.7469		1	ARS-BFGL-NGS-94399	2	1	DOM	2/9	61/210	1		1	ARS-BFGL-NGS-94399	2	1	REC	0/11	3/268	1
1	ARS-BFGL-NGS-109258	57447817	1	0.09091	0.0738	2	0.6751	1.255		1	ARS-BFGL-NGS-109258	1	2	DOM	2/9	39/232	0.6649		1	ARS-BFGL-NGS-109258	1	2	REC	0/11	1/270	1
1	ARS-BFGL-NGS-112451	57469104	1	0.5455	0.4483	2	0.3902	1.477		1	ARS-BFGL-NGS-112451	1	2	DOM	8/3	193/78	1		1	ARS-BFGL-NGS-112451	1	2	REC	4/7	50/221	0.2307
1	ARS-BFGL-NGS-87988	57496780	2	0.09091	0.07407	1	0.6759	1.25		1	ARS-BFGL-NGS-87988	2	1	DOM	2/9	39/231	0.6657		1	ARS-BFGL-NGS-87988	2	1	REC	0/11	1/269	1
1	BovineHD0100016445	57668777	2	0.4545	0.4007	1	0.6605	1.246		1	BovineHD0100016445	2	1	DOM	9/2	177/90	0.348		1	BovineHD0100016445	2	1	REC	1/10	37/230	1
1	BovineHD0100016455	57703184	2	0.4545	0.3579	1	0.3715	1.495		1	BovineHD0100016455	2	1	DOM	9/2	161/110	0.2095		1	BovineHD0100016455	2	1	REC	1/10	33/238	1
1	BovineHD0100016466	57757427	2	0.2727	0.2659	1	1	1.035		1	BovineHD0100016466	2	1	DOM	6/5	125/142	0.7607		1	BovineHD0100016466	2	1	REC	0/11	17/250	1
1	BovineHD0100016479	57824017	1	0.5	0.3948	2	0.3765	1.533		1	BovineHD0100016479	1	2	DOM	7/4	169/102	1		1	BovineHD0100016479	1	2	REC	4/7	45/226	0.1039
1	BovineHD0100016540	57991815	2	0.3182	0.4157	1	0.5081	0.6559		1	BovineHD0100016540	2	1	DOM	7/4	179/88	0.7563		1	BovineHD0100016540	2	1	REC	0/11	43/224	0.224
1	ARS-BFGL-NGS-40337	58000696	1	0.4091	0.4336	2	1	0.9044		1	ARS-BFGL-NGS-40337	1	2	DOM	8/3	183/88	1		1	ARS-BFGL-NGS-40337	1	2	REC	1/10	52/219	0.6959
1	BovineHD0100016543	58010555	2	0.4545	0.264	1	0.08287	2.323		1	BovineHD0100016543	2	1	DOM	7/4	122/145	0.3562		1	BovineHD0100016543	2	1	REC	3/8	19/248	0.04693
1	BovineHD0100016547	58022228	1	0.6364	0.4682	2	0.1326	1.988		1	BovineHD0100016547	1	2	DOM	10/1	193/74	0.2984		1	BovineHD0100016547	1	2	REC	4/7	57/210	0.2648
1	BovineHD0100016552	58037238	1	0.4545	0.4111	2	0.8257	1.194		1	BovineHD0100016552	1	2	DOM	9/2	174/96	0.3393		1	BovineHD0100016552	1	2	REC	1/10	48/222	0.6957
1	BovineHD0100016570	58101934	1	0.3182	0.2177	2	0.2942	1.677		1	BovineHD0100016570	1	2	DOM	4/7	103/168	1		1	BovineHD0100016570	1	2	REC	3/8	15/256	0.0262
1	BovineHD0100016583	58142540	2	0.1364	0.1273	1	0.7525	1.082		1	BovineHD0100016583	2	1	DOM	3/8	67/204	1		1	BovineHD0100016583	2	1	REC	0/11	2/269	1
1	Hapmap36459-SCAFFOLD9563_462	58250592	1	0.1364	0.2214	2	0.4381	0.5553		1	Hapmap36459-SCAFFOLD9563_462	1	2	DOM	3/8	108/163	0.5359		1	Hapmap36459-SCAFFOLD9563_462	1	2	REC	0/11	12/259	1
1	Hapmap23307-BTA-124083	58277309	2	0.04545	0.0369	1	0.573	1.243		1	Hapmap23307-BTA-124083	2	1	DOM	1/10	20/251	0.5799		1	Hapmap23307-BTA-124083	2	1	REC	0/11	0/271	1
1	ARS-BFGL-NGS-103637	58315322	2	0.2273	0.1389	1	0.2229	1.824		1	ARS-BFGL-NGS-103637	2	1	DOM	4/7	71/199	0.4915		1	ARS-BFGL-NGS-103637	2	1	REC	1/10	4/266	0.1822
1	BovineHD0100016660	58350244	1	0.4545	0.4188	2	0.8267	1.156		1	BovineHD0100016660	1	2	DOM	8/3	183/88	1		1	BovineHD0100016660	1	2	REC	2/9	44/227	0.6964
1	BovineHD0100016692	58509867	1	0.1364	0.09888	2	0.4759	1.439		1	BovineHD0100016692	1	2	DOM	3/8	52/216	0.4579		1	BovineHD0100016692	1	2	REC	0/11	1/267	1
1	BovineHD0100016696	58530676	1	0.5	0.4663	2	0.8291	1.145		1	BovineHD0100016696	1	2	DOM	9/2	192/75	0.7329		1	BovineHD0100016696	1	2	REC	2/9	57/210	1
1	BovineHD0100016697	58535639	1	0.5	0.4663	2	0.8291	1.145		1	BovineHD0100016697	1	2	DOM	9/2	192/75	0.7329		1	BovineHD0100016697	1	2	REC	2/9	57/210	1
1	Hapmap44172-BTA-96950	58540410	1	0.5	0.4649	2	0.8288	1.151		1	Hapmap44172-BTA-96950	1	2	DOM	9/2	195/76	0.7329		1	Hapmap44172-BTA-96950	1	2	REC	2/9	57/214	1
1	BovineHD0100046466	58586597	2	0.2273	0.1315	1	0.2017	1.943		1	BovineHD0100046466	2	1	DOM	3/8	65/205	0.7307		1	BovineHD0100046466	2	1	REC	2/9	6/264	0.03436
1	Hapmap47450-BTA-96948	58626471	1	0.5	0.3506	2	0.1748	1.853		1	Hapmap47450-BTA-96948	1	2	DOM	8/3	157/114	0.3717		1	Hapmap47450-BTA-96948	1	2	REC	3/8	33/238	0.1532
1	BovineHD0100016719	58630970	2	0.1818	0.1033	1	0.2776	1.929		1	BovineHD0100016719	2	1	DOM	4/7	54/217	0.2454		1	BovineHD0100016719	2	1	REC	0/11	2/269	1
1	BovineHD0100016728	58675214	2	0.3	0.2305	1	0.4307	1.431		1	BovineHD0100016728	2	1	DOM	5/5	117/152	0.7521		1	BovineHD0100016728	2	1	REC	1/9	7/262	0.2561
1	BTA-96949-no-rs	58773333	1	0.5	0.3616	2	0.2583	1.765		1	BTA-96949-no-rs	1	2	DOM	8/3	163/108	0.5359		1	BTA-96949-no-rs	1	2	REC	3/8	33/238	0.1532
1	BovineHD0100016781	58803748	2	0.3	0.2556	1	0.6108	1.248		1	BovineHD0100016781	2	1	DOM	5/5	119/151	0.7544		1	BovineHD0100016781	2	1	REC	1/9	19/251	0.5294
1	BTA-31615-no-rs	58830804	1	0.3636	0.3192	2	0.6474	1.219		1	BTA-31615-no-rs	1	2	DOM	6/5	149/122	1		1	BTA-31615-no-rs	1	2	REC	2/9	24/247	0.2688
1	BovineHD0100016763	58880630	2	0.4	0.3545	1	0.6441	1.214		1	BovineHD0100016763	2	1	DOM	6/4	161/107	1		1	BovineHD0100016763	2	1	REC	2/8	29/239	0.3087
1	Hapmap44328-BTA-97952	58885004	1	0.1364	0.1439	2	1	0.9393		1	Hapmap44328-BTA-97952	1	2	DOM	3/8	74/197	1		1	Hapmap44328-BTA-97952	1	2	REC	0/11	4/267	1
1	BovineHD0100016802	58914092	2	0.25	0.2082	1	0.5856	1.268		1	BovineHD0100016802	2	1	DOM	4/6	103/166	1		1	BovineHD0100016802	2	1	REC	1/9	9/260	0.3101
1	ARS-USMARC-Parent-DQ404150-rs29012530	58965351	1	0.3182	0.2435	2	0.4505	1.449		1	ARS-USMARC-Parent-DQ404150-rs29012530	1	2	DOM	6/5	117/154	0.5415		1	ARS-USMARC-Parent-DQ404150-rs29012530	1	2	REC	1/10	15/256	0.4803
1	UA-IFASA-2169	58991146	1	0.3636	0.2583	2	0.3216	1.641		1	UA-IFASA-2169	1	2	DOM	6/5	125/146	0.7597		1	UA-IFASA-2169	1	2	REC	2/9	15/256	0.1365
1	BovineHD0100016837	58999514	1	0.55	0.4739	2	0.6495	1.357		1	BovineHD0100016837	1	2	DOM	8/2	203/65	1		1	BovineHD0100016837	1	2	REC	3/7	51/217	0.4143
1	BovineHD0100016850	59041533	1	0.4091	0.437	2	0.8304	0.8918		1	BovineHD0100016850	1	2	DOM	8/3	192/78	1		1	BovineHD0100016850	1	2	REC	1/10	44/226	1
1	BTB-00028136	59116837	1	0.3182	0.2196	2	0.2968	1.659		1	BTB-00028136	1	2	DOM	5/6	108/163	0.7595		1	BTB-00028136	1	2	REC	2/9	11/260	0.08534
1	BTB-01868157	59146697	1	0.09091	0.1033	2	1	0.8679		1	BTB-01868157	1	2	DOM	2/9	53/218	1		1	BTB-01868157	1	2	REC	0/11	3/268	1
1	BovineHD0100016878	59159905	1	0.4091	0.4167	2	1	0.9692		1	BovineHD0100016878	1	2	DOM	8/3	177/93	0.7541		1	BovineHD0100016878	1	2	REC	1/10	48/222	0.6957
1	BTB-00028238	59203569	1	0.3636	0.3376	2	0.8203	1.121		1	BTB-00028238	1	2	DOM	7/4	151/120	0.7604		1	BTB-00028238	1	2	REC	1/10	32/239	1
1	Hapmap48289-BTA-31617	59240053	2	0.1364	0.1347	1	1	1.014		1	Hapmap48289-BTA-31617	2	1	DOM	2/9	68/203	1		1	Hapmap48289-BTA-31617	2	1	REC	1/10	5/266	0.2141
1	ARS-BFGL-NGS-94997	59266659	1	0.1818	0.2362	2	0.7973	0.7188		1	ARS-BFGL-NGS-94997	1	2	DOM	4/7	114/157	0.7663		1	ARS-BFGL-NGS-94997	1	2	REC	0/11	14/257	1
1	BovineHD0100016948	59444156	2	0.4091	0.3506	1	0.6502	1.283		1	BovineHD0100016948	2	1	DOM	7/4	160/111	1		1	BovineHD0100016948	2	1	REC	2/9	30/241	0.3609
1	BovineHD0100016955	59474636	2	0.2727	0.393	1	0.3723	0.5792		1	BovineHD0100016955	2	1	DOM	6/5	172/99	0.5411		1	BovineHD0100016955	2	1	REC	0/11	41/230	0.376
1	BovineHD0100016959	59498681	1	0.2273	0.1882	2	0.5865	1.269		1	BovineHD0100016959	1	2	DOM	4/7	92/179	1		1	BovineHD0100016959	1	2	REC	1/10	10/261	0.3597
1	Hapmap48717-BTA-31633	59520349	1	0.4091	0.3653	2	0.6592	1.203		1	Hapmap48717-BTA-31633	1	2	DOM	7/4	166/105	1		1	Hapmap48717-BTA-31633	1	2	REC	2/9	32/239	0.628
1	BTB-00028647	59555496	1	0.3182	0.3303	2	1	0.9464		1	BTB-00028647	1	2	DOM	6/5	149/122	1		1	BTB-00028647	1	2	REC	1/10	30/241	1
1	BovineHD0100016992	59659477	2	0.1818	0.2444	1	0.6181	0.6869		1	BovineHD0100016992	2	1	DOM	4/7	117/153	0.7623		1	BovineHD0100016992	2	1	REC	0/11	15/255	1
1	Hapmap31065-BTA-123406	59686995	2	0.2273	0.2768	1	0.8082	0.7686		1	Hapmap31065-BTA-123406	2	1	DOM	5/6	132/139	1		1	Hapmap31065-BTA-123406	2	1	REC	0/11	18/253	1
1	BovineHD0100017003	59704724	1	0.3636	0.4222	2	0.6636	0.782		1	BovineHD0100017003	1	2	DOM	7/4	190/80	0.7381		1	BovineHD0100017003	1	2	REC	1/10	38/232	1
1	BTA-31638-no-rs	59733534	2	0.04545	0.02952	1	0.4966	1.565		1	BTA-31638-no-rs	2	1	DOM	1/10	16/255	0.5018		1	BTA-31638-no-rs	2	1	REC	0/11	0/271	1
1	ARS-BFGL-NGS-110620	59777594	1	0.1364	0.1771	2	0.7804	0.7336		1	ARS-BFGL-NGS-110620	1	2	DOM	3/8	88/183	1		1	ARS-BFGL-NGS-110620	1	2	REC	0/11	8/263	1
1	BovineHD0100017026	59780658	1	0.4545	0.4207	2	0.827	1.148		1	BovineHD0100017026	1	2	DOM	8/3	179/92	0.7555		1	BovineHD0100017026	1	2	REC	2/9	49/222	1
1	BovineHD0100017032	59814364	1	0.3182	0.2389	2	0.4455	1.487		1	BovineHD0100017032	1	2	DOM	5/6	111/159	0.7654		1	BovineHD0100017032	1	2	REC	2/9	18/252	0.1798
1	BovineHD0100017052	59896010	1	0.2273	0.1654	2	0.3941	1.484		1	BovineHD0100017052	1	2	DOM	4/7	81/188	0.74		1	BovineHD0100017052	1	2	REC	1/10	8/261	0.3065
1	Hapmap47563-BTA-31648	59924376	2	0.2727	0.3044	1	1	0.8568		1	Hapmap47563-BTA-31648	2	1	DOM	5/6	145/126	0.7602		1	Hapmap47563-BTA-31648	2	1	REC	1/10	20/251	0.5799
1	BovineHD0100017076	59960792	1	0.2727	0.3148	2	0.8165	0.8162		1	BovineHD0100017076	1	2	DOM	5/6	148/122	0.5552		1	BovineHD0100017076	1	2	REC	1/10	22/248	1
1	ARS-BFGL-NGS-36297	59980590	1	0.2727	0.3745	2	0.3768	0.6262		1	ARS-BFGL-NGS-36297	1	2	DOM	6/5	170/101	0.7522		1	ARS-BFGL-NGS-36297	1	2	REC	0/11	33/238	0.373
1	BovineHD0100017085	59982960	2	0.4545	0.5	1	0.8284	0.8333		1	BovineHD0100017085	2	1	DOM	7/4	200/68	0.4824		1	BovineHD0100017085	2	1	REC	3/8	68/200	1
1	BovineHD4100000339	60006646	2	0.1818	0.1914	1	1	0.9385		1	BovineHD4100000339	2	1	DOM	3/8	96/173	0.7518		1	BovineHD4100000339	2	1	REC	1/10	7/262	0.2773
1	ARS-BFGL-NGS-115239	60022954	2	0.2727	0.2749	1	1	0.9891		1	ARS-BFGL-NGS-115239	2	1	DOM	5/6	132/139	1		1	ARS-BFGL-NGS-115239	2	1	REC	1/10	17/254	0.5225
1	BovineHD0100017119	60087869	2	0.2727	0.417	1	0.1937	0.5243		1	BovineHD0100017119	2	1	DOM	6/5	183/88	0.5136		1	BovineHD0100017119	2	1	REC	0/11	43/228	0.2254
1	BovineHD0100017124	60123244	2	0.5455	0.4389	1	0.3835	1.534		1	BovineHD0100017124	2	1	DOM	8/3	190/80	1		1	BovineHD0100017124	2	1	REC	4/7	47/223	0.1184
1	BTB-02009342	60212971	2	0.4545	0.3192	1	0.244	1.777		1	BTB-02009342	2	1	DOM	8/3	150/121	0.3572		1	BTB-02009342	2	1	REC	2/9	23/248	0.2535
1	BTA-23353-no-rs	60247154	2	0.4545	0.4114	1	0.8258	1.192		1	BTA-23353-no-rs	2	1	DOM	8/3	181/90	1		1	BTA-23353-no-rs	2	1	REC	2/9	42/229	0.6835
1	ARS-BFGL-NGS-117152	60275851	1	0.2727	0.2583	2	0.809	1.077		1	ARS-BFGL-NGS-117152	1	2	DOM	4/7	122/149	0.7595		1	ARS-BFGL-NGS-117152	1	2	REC	2/9	18/253	0.1787
1	UA-IFASA-7336	60313183	1	0.09091	0.1642	2	0.5549	0.509		1	UA-IFASA-7336	1	2	DOM	2/9	83/188	0.5139		1	UA-IFASA-7336	1	2	REC	0/11	6/265	1
1	BovineHD0100017217	60339396	1	0.4545	0.3852	2	0.5119	1.33		1	BovineHD0100017217	1	2	DOM	8/3	169/101	0.7515		1	BovineHD0100017217	1	2	REC	2/9	39/231	0.6657
1	Hapmap57078-ss46526391	60407283	2	0.1364	0.2509	1	0.3138	0.4714		1	Hapmap57078-ss46526391	2	1	DOM	3/8	122/149	0.3562		1	Hapmap57078-ss46526391	2	1	REC	0/11	14/257	1
1	ARS-BFGL-NGS-30543	60434371	1	0.4545	0.4428	2	1	1.049		1	ARS-BFGL-NGS-30543	1	2	DOM	7/4	194/77	0.5183		1	ARS-BFGL-NGS-30543	1	2	REC	3/8	46/225	0.412
1	BTB-00029666	60476588	2	0.5909	0.428	1	0.1869	1.93		1	BTB-00029666	2	1	DOM	10/1	180/91	0.1096		1	BTB-00029666	2	1	REC	3/8	52/219	0.4534
1	BovineHD0100017270	60497520	1	0	0.02037	2	1	0		1	BovineHD0100017270	1	2	DOM	0/11	11/259	1		1	BovineHD0100017270	1	2	REC	0/11	0/270	1
1	Hapmap48290-BTA-31675	60519622	2	0.2727	0.4336	1	0.1867	0.4899		1	Hapmap48290-BTA-31675	2	1	DOM	5/6	191/80	0.09655		1	Hapmap48290-BTA-31675	2	1	REC	1/10	44/227	1
1	Hapmap42177-BTA-31679	60575311	1	0.09091	0.2934	2	0.05118	0.2409		1	Hapmap42177-BTA-31679	1	2	DOM	2/9	138/133	0.06038		1	Hapmap42177-BTA-31679	1	2	REC	0/11	21/250	1
1	Hapmap35167-VSWCP1D5775A_scf01	60638907	2	0.3636	0.3413	1	0.8217	1.103		1	Hapmap35167-VSWCP1D5775A_scf01	2	1	DOM	7/4	155/116	0.7638		1	Hapmap35167-VSWCP1D5775A_scf01	2	1	REC	1/10	30/241	1
1	BovineHD0100017342	60645127	2	0.1364	0.2045	1	0.5916	0.6144		1	BovineHD0100017342	2	1	DOM	3/8	99/170	0.7512		1	BovineHD0100017342	2	1	REC	0/11	11/258	1
1	ARS-BFGL-NGS-107624	60678008	2	0.1364	0.2232	1	0.4375	0.5494		1	ARS-BFGL-NGS-107624	2	1	DOM	3/8	110/161	0.5344		1	ARS-BFGL-NGS-107624	2	1	REC	0/11	11/260	1
1	BTB-00030270	60709251	2	0	0.04797	1	0.6162	0		1	BTB-00030270	2	1	DOM	0/11	25/246	0.6067		1	BTB-00030270	2	1	REC	0/11	1/270	1
1	ARS-BFGL-NGS-3821	60736616	1	0.3636	0.3708	2	1	0.9694		1	ARS-BFGL-NGS-3821	1	2	DOM	7/4	161/110	1		1	ARS-BFGL-NGS-3821	1	2	REC	1/10	40/231	1
1	Hapmap41191-BTA-16674	60779046	2	0.5	0.2915	1	0.0545	2.43		1	Hapmap41191-BTA-16674	2	1	DOM	8/3	135/136	0.2178		1	Hapmap41191-BTA-16674	2	1	REC	3/8	23/248	0.06986
1	BTB-02006134	60806613	2	0.6818	0.4834	1	0.08239	2.29		1	BTB-02006134	2	1	DOM	9/2	198/73	0.7331		1	BTB-02006134	2	1	REC	6/5	64/207	0.0304
1	Hapmap59735-rs29016420	60831272	2	0.4091	0.3321	1	0.4923	1.392		1	Hapmap59735-rs29016420	2	1	DOM	7/4	155/116	0.7638		1	Hapmap59735-rs29016420	2	1	REC	2/9	25/246	0.2841
1	BovineHD0100017398	60831984	1	0.1818	0.1956	2	1	0.914		1	BovineHD0100017398	1	2	DOM	3/8	98/173	0.7514		1	BovineHD0100017398	1	2	REC	1/10	8/263	0.3047
1	ARS-BFGL-BAC-20015	60899823	1	0.4091	0.4317	2	1	0.9112		1	ARS-BFGL-BAC-20015	1	2	DOM	7/4	185/86	0.7483		1	ARS-BFGL-BAC-20015	1	2	REC	2/9	49/222	1
1	BovineHD0100017425	60943734	1	0.2273	0.237	2	1	0.9467		1	BovineHD0100017425	1	2	DOM	4/7	116/154	0.7633		1	BovineHD0100017425	1	2	REC	1/10	12/258	0.4119
1	BTB-00031129	60979138	1	0	0.03875	2	1	0		1	BTB-00031129	1	2	DOM	0/11	21/250	1		1	BTB-00031129	1	2	REC	0/11	0/271	1
1	BovineHD0100017450	61036146	2	0.4091	0.3727	1	0.8229	1.165		1	BovineHD0100017450	2	1	DOM	7/4	169/102	1		1	BovineHD0100017450	2	1	REC	2/9	33/238	0.6325
1	BovineHD0100017461	61075432	2	0.2727	0.2574	1	0.8084	1.082		1	BovineHD0100017461	2	1	DOM	5/6	122/148	1		1	BovineHD0100017461	2	1	REC	1/10	17/253	0.5238
1	BTB-00030962	61100002	2	0.2727	0.1937	1	0.4093	1.561		1	BTB-00030962	2	1	DOM	5/6	92/179	0.5202		1	BTB-00030962	2	1	REC	1/10	13/258	0.4348
1	Hapmap38402-BTA-32592	61128757	1	0.3636	0.428	2	0.6622	0.7635		1	Hapmap38402-BTA-32592	1	2	DOM	6/5	183/88	0.5136		1	Hapmap38402-BTA-32592	1	2	REC	2/9	49/222	1
1	BTB-00030894	61160105	2	0.09091	0.2565	1	0.08404	0.2899		1	BTB-00030894	2	1	DOM	2/9	126/145	0.1188		1	BTB-00030894	2	1	REC	0/11	13/258	1
1	BTA-31690-no-rs	61189193	2	0	0.01292	1	1	0		1	BTA-31690-no-rs	2	1	DOM	0/11	7/264	1		1	BTA-31690-no-rs	2	1	REC	0/11	0/271	1
1	BTB-00030699	61219155	2	0.04545	0.1181	1	0.4963	0.3557		1	BTB-00030699	2	1	DOM	1/10	60/211	0.4661		1	BTB-00030699	2	1	REC	0/11	4/267	1
1	ARS-BFGL-NGS-27164	61244179	2	0.04545	0.05166	1	1	0.8741		1	ARS-BFGL-NGS-27164	2	1	DOM	1/10	26/245	1		1	ARS-BFGL-NGS-27164	2	1	REC	0/11	2/269	1
1	BovineHD0100017541	61290448	2	0.3636	0.3561	1	1	1.033		1	BovineHD0100017541	2	1	DOM	6/5	159/112	0.7666		1	BovineHD0100017541	2	1	REC	2/9	34/237	0.6373
1	BTB-00030560	61312093	1	0	0.04428	2	0.6164	0		1	BTB-00030560	1	2	DOM	0/11	23/248	0.6085		1	BTB-00030560	1	2	REC	0/11	1/270	1
1	Hapmap53538-rs29018897	61346083	2	0.09091	0.2768	1	0.08235	0.2613		1	Hapmap53538-rs29018897	2	1	DOM	2/9	133/138	0.06291		1	Hapmap53538-rs29018897	2	1	REC	0/11	17/254	1
1	ARS-BFGL-NGS-2189	61409890	1	0.4091	0.4244	2	1	0.9391		1	ARS-BFGL-NGS-2189	1	2	DOM	8/3	185/86	1		1	ARS-BFGL-NGS-2189	1	2	REC	1/10	45/226	1
1	BovineHD0100017600	61470011	2	0.4091	0.4926	1	0.5173	0.7131		1	BovineHD0100017600	2	1	DOM	8/3	203/68	1		1	BovineHD0100017600	2	1	REC	1/10	64/207	0.4662
1	Hapmap51585-BTA-32601	61517865	1	0.09091	0.2546	2	0.127	0.2928		1	Hapmap51585-BTA-32601	1	2	DOM	2/9	125/146	0.1188		1	Hapmap51585-BTA-32601	1	2	REC	0/11	13/258	1
1	BTA-103663-no-rs	61538142	2	0.09091	0.07565	1	0.6808	1.222		1	BTA-103663-no-rs	2	1	DOM	2/9	39/232	0.6649		1	BTA-103663-no-rs	2	1	REC	0/11	2/269	1
1	BovineHD0100017627	61555038	2	0.3182	0.4296	1	0.381	0.6195		1	BovineHD0100017627	2	1	DOM	5/6	182/88	0.1894		1	BovineHD0100017627	2	1	REC	2/9	50/220	1
1	ARS-BFGL-NGS-40229	61583136	1	0.4091	0.3118	2	0.3538	1.528		1	ARS-BFGL-NGS-40229	1	2	DOM	9/2	139/132	0.06385		1	ARS-BFGL-NGS-40229	1	2	REC	0/11	30/241	0.6136
1	BovineHD0100017646	61605906	1	0.3636	0.2804	2	0.4689	1.466		1	BovineHD0100017646	1	2	DOM	8/3	128/143	0.1269		1	BovineHD0100017646	1	2	REC	0/11	24/247	0.6072
1	BovineHD0100017648	61618060	2	0.4091	0.3074	1	0.3492	1.56		1	BovineHD0100017648	2	1	DOM	9/2	138/132	0.06336		1	BovineHD0100017648	2	1	REC	0/11	28/242	0.6093
1	ARS-BFGL-NGS-101934	61629350	2	0.1818	0.1199	1	0.3305	1.631		1	ARS-BFGL-NGS-101934	2	1	DOM	3/8	62/209	0.7197		1	ARS-BFGL-NGS-101934	2	1	REC	1/10	3/268	0.1479
1	BovineHD0100017650	61638069	2	0.2727	0.4	1	0.2718	0.5625		1	BovineHD0100017650	2	1	DOM	6/5	182/88	0.514		1	BovineHD0100017650	2	1	REC	0/11	34/236	0.3709
1	BovineHD0100017660	61697968	2	0.5	0.4649	1	0.8288	1.151		1	BovineHD0100017660	2	1	DOM	9/2	204/67	1		1	BovineHD0100017660	2	1	REC	2/9	48/223	1
1	Hapmap42400-BTA-102731	61741423	2	0.5	0.4668	1	0.8292	1.142		1	Hapmap42400-BTA-102731	2	1	DOM	9/2	201/70	0.7349		1	Hapmap42400-BTA-102731	2	1	REC	2/9	52/219	1
1	BovineHD0100017684	61774550	1	0.2273	0.1494	2	0.3587	1.674		1	BovineHD0100017684	1	2	DOM	4/7	76/195	0.5131		1	BovineHD0100017684	1	2	REC	1/10	5/266	0.2141
1	ARS-BFGL-NGS-91410	61817159	2	0.2273	0.1439	1	0.3502	1.75		1	ARS-BFGL-NGS-91410	2	1	DOM	4/7	73/198	0.4988		1	ARS-BFGL-NGS-91410	2	1	REC	1/10	5/266	0.2141
1	BovineHD0100017707	61897376	2	0.2727	0.2712	1	1	1.008		1	BovineHD0100017707	2	1	DOM	6/5	128/143	0.7615		1	BovineHD0100017707	2	1	REC	0/11	19/252	1
1	BTB-01806856	62003821	1	0.1364	0.2675	2	0.22	0.4323		1	BTB-01806856	1	2	DOM	3/8	127/144	0.2333		1	BTB-01806856	1	2	REC	0/11	18/253	1
1	BovineHD0100017729	62009095	2	0.4545	0.413	1	0.8259	1.185		1	BovineHD0100017729	2	1	DOM	8/3	179/91	0.7563		1	BovineHD0100017729	2	1	REC	2/9	44/226	0.6974
1	BovineHD0100017746	62066946	1	0.2727	0.1661	2	0.2406	1.883		1	BovineHD0100017746	1	2	DOM	5/6	84/187	0.3315		1	BovineHD0100017746	1	2	REC	1/10	6/265	0.2454
1	Hapmap39200-BTA-32607	62092465	1	0.5	0.4631	2	0.8285	1.159		1	Hapmap39200-BTA-32607	1	2	DOM	7/4	195/76	0.5131		1	Hapmap39200-BTA-32607	1	2	REC	4/7	56/215	0.2549
1	Hapmap38640-BTA-92406	62137916	2	0.5909	0.4539	1	0.2753	1.738		1	Hapmap38640-BTA-92406	2	1	DOM	9/2	193/78	0.7338		1	Hapmap38640-BTA-92406	2	1	REC	4/7	53/218	0.2412
1	BovineHD0100017773	62178500	1	0.3636	0.4463	2	0.5157	0.709		1	BovineHD0100017773	1	2	DOM	7/4	192/78	0.7357		1	BovineHD0100017773	1	2	REC	1/10	49/221	0.6953
1	BovineHD0100017775	62188650	1	0.4091	0.3614	2	0.6562	1.223		1	BovineHD0100017775	1	2	DOM	8/3	160/107	0.5352		1	BovineHD0100017775	1	2	REC	1/10	33/234	1
1	BTB-00031464	62207514	1	0.2273	0.3063	2	0.4889	0.6662		1	BTB-00031464	1	2	DOM	5/6	147/124	0.7594		1	BTB-00031464	1	2	REC	0/11	19/252	1
1	BovineHD0100017788	62228314	2	0.3182	0.2546	1	0.4662	1.366		1	BovineHD0100017788	2	1	DOM	6/5	125/146	0.7597		1	BovineHD0100017788	2	1	REC	1/10	13/258	0.4348
1	BTB-00031535	62238398	2	0.2727	0.2085	1	0.433	1.424		1	BTB-00031535	2	1	DOM	5/6	100/171	0.5449		1	BTB-00031535	2	1	REC	1/10	13/258	0.4348
1	BovineHD0100017797	62247467	2	0.55	0.4093	1	0.2499	1.764		1	BovineHD0100017797	2	1	DOM	7/3	178/92	1		1	BovineHD0100017797	2	1	REC	4/6	43/227	0.06772
1	ARS-BFGL-NGS-42248	62269764	2	0.1818	0.3192	1	0.2415	0.474		1	ARS-BFGL-NGS-42248	2	1	DOM	3/8	149/122	0.1196		1	ARS-BFGL-NGS-42248	2	1	REC	1/10	24/247	1
1	BovineHD0100017803	62273759	1	0.2	0.3704	2	0.1566	0.425		1	BovineHD0100017803	1	2	DOM	3/7	164/106	0.0957		1	BovineHD0100017803	1	2	REC	1/9	36/234	1
1	ARS-BFGL-NGS-102719	62305513	1	0.1818	0.3561	2	0.112	0.4018		1	ARS-BFGL-NGS-102719	1	2	DOM	3/8	159/112	0.05892		1	ARS-BFGL-NGS-102719	1	2	REC	1/10	34/237	1
1	BovineHD0100017817	62327960	2	0.5455	0.3074	1	0.03235	2.704		1	BovineHD0100017817	2	1	DOM	8/3	139/131	0.2229		1	BovineHD0100017817	2	1	REC	4/7	27/243	0.02316
1	ARS-BFGL-NGS-115080	62364649	2	0.1364	0.05904	1	0.1498	2.516		1	ARS-BFGL-NGS-115080	2	1	DOM	3/8	32/239	0.1437		1	ARS-BFGL-NGS-115080	2	1	REC	0/11	0/271	1
1	ARS-BFGL-NGS-114995	62394973	1	0.1364	0.2491	2	0.3139	0.476		1	ARS-BFGL-NGS-114995	1	2	DOM	3/8	124/147	0.3552		1	ARS-BFGL-NGS-114995	1	2	REC	0/11	11/260	1
1	ARS-BFGL-NGS-100977	62421587	2	0.4091	0.3432	1	0.5033	1.325		1	ARS-BFGL-NGS-100977	2	1	DOM	7/4	152/119	0.761		1	ARS-BFGL-NGS-100977	2	1	REC	2/9	34/237	0.6373
1	BovineHD0100017842	62445177	2	0.1364	0.09259	1	0.4525	1.547		1	BovineHD0100017842	2	1	DOM	3/8	49/221	0.4327		1	BovineHD0100017842	2	1	REC	0/11	1/269	1
1	BTB-01665387	62457515	1	0.2273	0.3653	2	0.2575	0.511		1	BTB-01665387	1	2	DOM	4/7	163/108	0.1295		1	BTB-01665387	1	2	REC	1/10	35/236	1
1	BovineHD0100017851	62471598	1	0.55	0.4481	2	0.4935	1.505		1	BovineHD0100017851	1	2	DOM	7/3	189/81	1		1	BovineHD0100017851	1	2	REC	4/6	53/217	0.1234
1	BovineHD0100017855	62488432	1	0.1	0.2045	2	0.3934	0.4323		1	BovineHD0100017855	1	2	DOM	2/8	100/169	0.3349		1	BovineHD0100017855	1	2	REC	0/10	10/259	1
1	BovineHD0100017856	62490666	1	0.1	0.2045	2	0.3934	0.4323		1	BovineHD0100017856	1	2	DOM	2/8	100/169	0.3349		1	BovineHD0100017856	1	2	REC	0/10	10/259	1
1	ARS-BFGL-NGS-14335	62494500	1	0.1364	0.2066	2	0.5916	0.6062		1	ARS-BFGL-NGS-14335	1	2	DOM	3/8	101/170	0.7515		1	ARS-BFGL-NGS-14335	1	2	REC	0/11	11/260	1
1	BTB-01506507	62523255	2	0.2727	0.3635	1	0.4988	0.6567		1	BTB-01506507	2	1	DOM	6/5	171/100	0.5449		1	BTB-01506507	2	1	REC	0/11	26/245	0.6069
1	BovineHD0100017879	62560018	1	0.09091	0.1426	2	0.7548	0.6013		1	BovineHD0100017879	1	2	DOM	2/9	71/199	0.7339		1	BovineHD0100017879	1	2	REC	0/11	6/264	1
1	BTB-01285049	62594967	2	0.3182	0.2878	1	0.8111	1.155		1	BTB-01285049	2	1	DOM	6/5	134/137	0.7687		1	BTB-01285049	2	1	REC	1/10	22/249	1
1	ARS-BFGL-NGS-112682	62631854	2	0.2727	0.19	1	0.4052	1.598		1	ARS-BFGL-NGS-112682	2	1	DOM	5/6	90/181	0.5164		1	ARS-BFGL-NGS-112682	2	1	REC	1/10	13/258	0.4348
1	BTB-01285245	62673903	1	0.5	0.4059	2	0.3858	1.464		1	BTB-01285245	1	2	DOM	9/2	174/97	0.3387		1	BTB-01285245	1	2	REC	2/9	46/225	1
1	Hapmap60296-rs29016002	62715096	1	0.65	0.4723	2	0.1703	2.075		1	Hapmap60296-rs29016002	1	2	DOM	8/2	192/79	0.7291		1	Hapmap60296-rs29016002	1	2	REC	5/5	64/207	0.06942
1	Hapmap49510-BTA-17452	62768510	1	0.2727	0.2546	2	0.8065	1.098		1	Hapmap49510-BTA-17452	1	2	DOM	5/6	126/145	1		1	Hapmap49510-BTA-17452	1	2	REC	1/10	12/259	0.4107
1	ARS-BFGL-NGS-4583	62817866	1	0.5	0.4576	2	0.8279	1.185		1	ARS-BFGL-NGS-4583	1	2	DOM	8/3	195/76	1		1	ARS-BFGL-NGS-4583	1	2	REC	3/8	53/218	0.4611
1	BTA-32633-no-rs	62841878	1	0.09091	0.1347	2	0.7544	0.6425		1	BTA-32633-no-rs	1	2	DOM	2/9	63/208	1		1	BTA-32633-no-rs	1	2	REC	0/11	10/261	1
1	BovineHD0100017984	62855706	2	0.3182	0.4333	1	0.3804	0.6103		1	BovineHD0100017984	2	1	DOM	5/6	182/88	0.1894		1	BovineHD0100017984	2	1	REC	2/9	52/218	1
1	BovineHD0100017999	62900770	2	0.2727	0.3481	1	0.6479	0.7021		1	BovineHD0100017999	2	1	DOM	5/6	164/106	0.3553		1	BovineHD0100017999	2	1	REC	1/10	24/246	1
1	Hapmap24328-BTA-108938	62924157	2	0.4	0.428	1	1	0.8908		1	Hapmap24328-BTA-108938	2	1	DOM	8/2	189/82	0.7283		1	Hapmap24328-BTA-108938	2	1	REC	0/10	43/228	0.3691
1	BTA-108948-no-rs	62972124	1	0.09091	0.06089	2	0.6399	1.542		1	BTA-108948-no-rs	1	2	DOM	2/9	33/238	0.6325		1	BTA-108948-no-rs	1	2	REC	0/11	0/271	1
1	BTA-101821-no-rs	63032317	2	0.1818	0.2343	1	0.797	0.7262		1	BTA-101821-no-rs	2	1	DOM	4/7	113/158	1		1	BTA-101821-no-rs	2	1	REC	0/11	14/257	1
1	BovineHD0100018022	63041158	2	0.3182	0.3796	1	0.6574	0.7626		1	BovineHD0100018022	2	1	DOM	7/4	176/94	1		1	BovineHD0100018022	2	1	REC	0/11	29/241	0.6113
1	ARS-BFGL-NGS-116361	63103154	1	0.1818	0.2343	2	0.797	0.7262		1	ARS-BFGL-NGS-116361	1	2	DOM	4/7	113/158	1		1	ARS-BFGL-NGS-116361	1	2	REC	0/11	14/257	1
1	Hapmap49061-BTA-122268	63139698	2	0.4545	0.5	1	0.8285	0.8333		1	Hapmap49061-BTA-122268	2	1	DOM	9/2	208/63	1		1	Hapmap49061-BTA-122268	2	1	REC	1/10	63/208	0.4656
1	BovineHD0100018044	63162754	2	0.4	0.3611	1	0.8136	1.179		1	BovineHD0100018044	2	1	DOM	6/4	165/105	1		1	BovineHD0100018044	2	1	REC	2/8	30/240	0.3197
1	ARS-BFGL-NGS-44433	63196236	1	0.4545	0.4594	2	1	0.9806		1	ARS-BFGL-NGS-44433	1	2	DOM	9/2	200/71	0.7341		1	ARS-BFGL-NGS-44433	1	2	REC	1/10	49/222	0.6954
1	Hapmap44333-BTA-104611	63222337	2	0.3636	0.3635	1	1	1.001		1	Hapmap44333-BTA-104611	2	1	DOM	7/4	164/107	1		1	Hapmap44333-BTA-104611	2	1	REC	1/10	33/238	1
1	BovineHD0100018062	63256956	1	0.4091	0.4446	2	0.8287	0.8647		1	BovineHD0100018062	1	2	DOM	8/3	198/73	1		1	BovineHD0100018062	1	2	REC	1/10	43/228	1
1	ARS-BFGL-NGS-105436	63346740	1	0.2727	0.3118	2	0.8168	0.8277		1	ARS-BFGL-NGS-105436	1	2	DOM	4/7	149/122	0.3552		1	ARS-BFGL-NGS-105436	1	2	REC	2/9	20/251	0.2082
1	ARS-BFGL-NGS-3132	63427104	2	0.09091	0.1181	1	1	0.7469		1	ARS-BFGL-NGS-3132	2	1	DOM	2/9	63/208	1		1	ARS-BFGL-NGS-3132	2	1	REC	0/11	1/270	1
1	BTB-00640138	63473042	2	0.1364	0.3395	1	0.06248	0.3072		1	BTB-00640138	2	1	DOM	3/8	156/115	0.06283		1	BTB-00640138	2	1	REC	0/11	28/243	0.6092
1	BTB-00639971	63540783	1	0.09091	0.1218	2	1	0.7212		1	BTB-00639971	1	2	DOM	1/10	62/209	0.4654		1	BTB-00639971	1	2	REC	1/10	4/267	0.1816
1	Hapmap31089-BTA-130737	63602126	1	0.1364	0.06089	2	0.1593	2.435		1	Hapmap31089-BTA-130737	1	2	DOM	2/9	32/239	0.628		1	Hapmap31089-BTA-130737	1	2	REC	1/10	1/270	0.07663
1	BTB-01687859	63694804	2	0.3636	0.3856	1	1	0.9105		1	BTB-01687859	2	1	DOM	6/5	172/99	0.5411		1	BTB-01687859	2	1	REC	2/9	37/234	0.6532
1	BovineHD0100018165	63716985	1	0.35	0.2007	2	0.1529	2.144		1	BovineHD0100018165	1	2	DOM	6/4	96/173	0.1782		1	BovineHD0100018165	1	2	REC	1/9	12/257	0.3844
1	BovineHD0100018178	63749969	2	0.2	0.2519	1	0.794	0.7426		1	BovineHD0100018178	2	1	DOM	3/7	123/147	0.5198		1	BovineHD0100018178	2	1	REC	1/9	13/257	0.4064
1	ARS-BFGL-NGS-27619	63879508	2	0.3182	0.2712	1	0.6291	1.254		1	ARS-BFGL-NGS-27619	2	1	DOM	6/5	130/141	0.7634		1	ARS-BFGL-NGS-27619	2	1	REC	1/10	17/254	0.5225
1	BovineHD0100018250	63914263	2	0.55	0.4796	1	0.6502	1.326		1	BovineHD0100018250	2	1	DOM	7/3	201/69	0.7206		1	BovineHD0100018250	2	1	REC	4/6	58/212	0.2359
1	BovineHD0100018262	63978104	2	0.35	0.4033	1	0.817	0.7965		1	BovineHD0100018262	2	1	DOM	6/4	182/87	0.7329		1	BovineHD0100018262	2	1	REC	1/9	35/234	1
1	BovineHD0100018263	63981310	2	0.35	0.4033	1	0.817	0.7965		1	BovineHD0100018263	2	1	DOM	6/4	182/87	0.7329		1	BovineHD0100018263	2	1	REC	1/9	35/234	1
1	BTB-00451094	64034192	1	0.3636	0.4059	2	0.8258	0.8364		1	BTB-00451094	1	2	DOM	7/4	184/87	0.7506		1	BTB-00451094	1	2	REC	1/10	36/235	1
1	BovineHD0100018286	64041973	1	0.2	0.2444	2	0.7945	0.7727		1	BovineHD0100018286	1	2	DOM	4/6	118/152	1		1	BovineHD0100018286	1	2	REC	0/10	14/256	1
1	BTB-00033025	64072711	2	0.09091	0.1052	1	1	0.8509		1	BTB-00033025	2	1	DOM	2/9	53/218	1		1	BTB-00033025	2	1	REC	0/11	4/267	1
1	ARS-BFGL-NGS-10860	64097352	2	0.1364	0.238	1	0.4394	0.5055		1	ARS-BFGL-NGS-10860	2	1	DOM	3/8	119/152	0.3599		1	ARS-BFGL-NGS-10860	2	1	REC	0/11	10/261	1
1	BovineHD0100018302	64119388	1	0.3	0.2037	2	0.2732	1.675		1	BovineHD0100018302	1	2	DOM	5/5	102/168	0.5135		1	BovineHD0100018302	1	2	REC	1/9	8/262	0.2826
1	BovineHD0100018309	64142274	1	0.25	0.1691	2	0.3634	1.637		1	BovineHD0100018309	1	2	DOM	4/6	84/185	0.73		1	BovineHD0100018309	1	2	REC	1/9	7/262	0.2561
1	ARS-BFGL-NGS-71757	64171919	1	0.4545	0.3819	2	0.5089	1.349		1	ARS-BFGL-NGS-71757	1	2	DOM	8/3	167/104	0.542		1	ARS-BFGL-NGS-71757	1	2	REC	2/9	40/231	0.6709
1	BovineHD0100018320	64178623	1	0.2	0.1903	2	1	1.064		1	BovineHD0100018320	1	2	DOM	4/6	91/177	0.7394		1	BovineHD0100018320	1	2	REC	0/10	11/257	1
1	BTB-00033090	64193131	2	0.4091	0.2804	1	0.2278	1.776		1	BTB-00033090	2	1	DOM	7/4	131/140	0.3694		1	BTB-00033090	2	1	REC	2/9	21/250	0.2231
1	BovineHD0100018326	64201222	2	0.25	0.187	1	0.5585	1.449		1	BovineHD0100018326	2	1	DOM	4/6	92/178	0.7401		1	BovineHD0100018326	2	1	REC	1/9	9/261	0.3091
1	BTB-00033167	64268930	2	0.2273	0.19	1	0.5898	1.254		1	BTB-00033167	2	1	DOM	5/6	94/177	0.525		1	BTB-00033167	2	1	REC	0/11	9/262	1
1	BTB-00026837	64391625	2	0.2727	0.2915	1	1	0.9114		1	BTB-00026837	2	1	DOM	6/5	138/133	1		1	BTB-00026837	2	1	REC	0/11	20/251	1
1	BovineHD0100018387	64403989	1	0.3182	0.4389	2	0.2831	0.5966		1	BovineHD0100018387	1	2	DOM	5/6	190/80	0.09752		1	BovineHD0100018387	1	2	REC	2/9	47/223	1
1	ARS-BFGL-NGS-33635	64483369	2	0.5455	0.4465	1	0.3886	1.488		1	ARS-BFGL-NGS-33635	2	1	DOM	8/3	191/80	1		1	ARS-BFGL-NGS-33635	2	1	REC	4/7	51/220	0.2338
1	BTB-00027056	64527662	1	0.5909	0.4834	2	0.3868	1.544		1	BTB-00027056	1	2	DOM	8/3	196/75	1		1	BTB-00027056	1	2	REC	5/6	66/205	0.1516
1	BovineHD0100018415	64547926	1	0.3	0.4704	2	0.1717	0.4826		1	BovineHD0100018415	1	2	DOM	5/5	191/79	0.1725		1	BovineHD0100018415	1	2	REC	1/9	63/207	0.4635
1	BovineHD0100018416	64552297	1	0.15	0.2778	2	0.3067	0.4588		1	BovineHD0100018416	1	2	DOM	3/7	138/132	0.2156		1	BovineHD0100018416	1	2	REC	0/10	12/258	1
1	BTA-15412-no-rs	64572534	2	0.04545	0.02768	1	0.4756	1.673		1	BTA-15412-no-rs	2	1	DOM	1/10	15/256	0.4803		1	BTA-15412-no-rs	2	1	REC	0/11	0/271	1
1	ARS-BFGL-NGS-112600	64627775	2	0.5909	0.4779	1	0.385	1.578		1	ARS-BFGL-NGS-112600	2	1	DOM	8/3	196/75	1		1	ARS-BFGL-NGS-112600	2	1	REC	5/6	63/208	0.1417
1	BovineHD0100018434	64645261	2	0.4545	0.4424	1	1	1.05		1	BovineHD0100018434	2	1	DOM	7/4	187/82	0.7416		1	BovineHD0100018434	2	1	REC	3/8	51/218	0.4487
1	BTB-00027149	64679107	2	0.2727	0.476	1	0.08024	0.4128		1	BTB-00027149	2	1	DOM	5/6	198/73	0.07906		1	BTB-00027149	2	1	REC	1/10	60/211	0.4661
1	BTB-00027201	64736792	2	0.2273	0.3948	1	0.1247	0.4508		1	BTB-00027201	2	1	DOM	4/7	175/96	0.1052		1	BTB-00027201	2	1	REC	1/10	39/232	1
1	BovineHD0100018462	64769230	1	0.1	0.1315	2	1	0.734		1	BovineHD0100018462	1	2	DOM	2/8	65/205	1		1	BovineHD0100018462	1	2	REC	0/10	6/264	1
1	BovineHD0100018473	64823955	1	0.2273	0.4015	2	0.1214	0.4385		1	BovineHD0100018473	1	2	DOM	4/7	177/92	0.05678		1	BovineHD0100018473	1	2	REC	1/10	39/230	1
1	BTB-00027298	64831957	2	0.09091	0.131	1	0.7552	0.6634		1	BTB-00027298	2	1	DOM	2/9	65/206	1		1	BTB-00027298	2	1	REC	0/11	6/265	1
1	BTB-00027332	64864876	2	0.04545	0.1273	1	0.5036	0.3264		1	BTB-00027332	2	1	DOM	1/10	63/208	0.4656		1	BTB-00027332	2	1	REC	0/11	6/265	1
1	BTB-00027405	64893868	2	0.09091	0.0572	1	0.3733	1.648		1	BTB-00027405	2	1	DOM	2/9	31/240	0.6238		1	BTB-00027405	2	1	REC	0/11	0/271	1
1	Hapmap42852-BTA-15416	64920298	1	0.09091	0.0572	2	0.3733	1.648		1	Hapmap42852-BTA-15416	1	2	DOM	2/9	31/240	0.6238		1	Hapmap42852-BTA-15416	1	2	REC	0/11	0/271	1
1	BovineHD0100018503	64935538	2	0.2273	0.4	1	0.122	0.4412		1	BovineHD0100018503	2	1	DOM	4/7	177/93	0.05829		1	BovineHD0100018503	2	1	REC	1/10	39/231	1
1	Hapmap32539-BTA-124026	64978225	1	0.09091	0.0572	2	0.3733	1.648		1	Hapmap32539-BTA-124026	1	2	DOM	2/9	31/240	0.6238		1	Hapmap32539-BTA-124026	1	2	REC	0/11	0/271	1
1	Hapmap55251-rs29014781	65022321	1	0.2727	0.3893	2	0.372	0.5883		1	Hapmap55251-rs29014781	1	2	DOM	6/5	175/96	0.5307		1	Hapmap55251-rs29014781	1	2	REC	0/11	36/235	0.3694
1	BovineHD0100018526	65041833	1	0	0.1059	2	0.2486	0		1	BovineHD0100018526	1	2	DOM	0/10	56/213	0.2203		1	BovineHD0100018526	1	2	REC	0/10	1/268	1
1	BTA-15421-no-rs	65061689	1	0.2727	0.387	2	0.3721	0.5939		1	BTA-15421-no-rs	1	2	DOM	6/5	174/96	0.5318		1	BTA-15421-no-rs	1	2	REC	0/11	35/235	0.3698
1	BovineHD0100018538	65090781	1	0.15	0.2602	2	0.4328	0.5017		1	BovineHD0100018538	1	2	DOM	3/7	125/144	0.3519		1	BovineHD0100018538	1	2	REC	0/10	15/254	1
1	BovineHD0100018540	65098749	2	0.3	0.3907	1	0.4893	0.6682		1	BovineHD0100018540	2	1	DOM	6/4	175/95	0.7461		1	BovineHD0100018540	2	1	REC	0/10	36/234	0.3705
1	BovineHD0100018544	65119095	2	0.3	0.3885	1	0.4903	0.6746		1	BovineHD0100018544	2	1	DOM	6/4	174/95	0.7469		1	BovineHD0100018544	2	1	REC	0/10	35/234	0.6193
1	BTB-00027516	65165222	1	0.1818	0.1587	2	0.7663	1.178		1	BTB-00027516	1	2	DOM	4/7	81/190	0.7391		1	BTB-00027516	1	2	REC	0/11	5/266	1
1	BovineHD0100018558	65173401	2	0.3182	0.4315	1	0.3806	0.6149		1	BovineHD0100018558	2	1	DOM	7/4	192/78	0.7357		1	BovineHD0100018558	2	1	REC	0/11	41/229	0.3763
1	ARS-BFGL-NGS-61496	65216449	1	0.25	0.1926	2	0.5639	1.397		1	ARS-BFGL-NGS-61496	1	2	DOM	5/5	90/180	0.315		1	ARS-BFGL-NGS-61496	1	2	REC	0/10	14/256	1
1	ARS-BFGL-NGS-83021	65333436	2	0.5	0.4613	1	0.8283	1.168		1	ARS-BFGL-NGS-83021	2	1	DOM	8/3	192/79	1		1	ARS-BFGL-NGS-83021	2	1	REC	3/8	58/213	0.7084
1	BovineHD0100018613	65366689	2	0.2727	0.25	1	0.8038	1.125		1	BovineHD0100018613	2	1	DOM	5/6	121/149	1		1	BovineHD0100018613	2	1	REC	1/10	14/256	0.4592
1	BTB-02069463	65413028	2	0.3636	0.3524	1	1	1.05		1	BTB-02069463	2	1	DOM	6/5	158/113	1		1	BTB-02069463	2	1	REC	2/9	33/238	0.6325
1	ARS-BFGL-NGS-3996	65517170	2	0.4091	0.4576	1	0.8278	0.8207		1	ARS-BFGL-NGS-3996	2	1	DOM	8/3	193/78	1		1	ARS-BFGL-NGS-3996	2	1	REC	1/10	55/216	0.6988
1	ARS-BFGL-NGS-115763	65535489	2	0.5	0.5	1	1	1		1	ARS-BFGL-NGS-115763	2	1	DOM	9/2	207/64	1		1	ARS-BFGL-NGS-115763	2	1	REC	2/9	64/207	1
1	ARS-BFGL-NGS-43799	65583709	2	0.4091	0.3413	1	0.5012	1.336		1	ARS-BFGL-NGS-43799	2	1	DOM	7/4	154/117	0.7627		1	ARS-BFGL-NGS-43799	2	1	REC	2/9	31/240	0.6238
1	Hapmap40403-BTA-15429	65625274	1	0.4545	0.4742	2	1	0.9241		1	Hapmap40403-BTA-15429	1	2	DOM	7/4	195/76	0.5131		1	Hapmap40403-BTA-15429	1	2	REC	3/8	62/209	0.7197
1	ARS-BFGL-BAC-19439	65647815	2	0.04545	0.04244	1	1	1.075		1	ARS-BFGL-BAC-19439	2	1	DOM	1/10	23/248	1		1	ARS-BFGL-BAC-19439	2	1	REC	0/11	0/271	1
1	ARS-BFGL-BAC-19440	65738282	1	0.1364	0.107	2	0.7218	1.318		1	ARS-BFGL-BAC-19440	1	2	DOM	3/8	57/214	0.7061		1	ARS-BFGL-BAC-19440	1	2	REC	0/11	1/270	1
1	BTB-00027638	65763047	1	0.5455	0.4631	2	0.5162	1.391		1	BTB-00027638	1	2	DOM	8/3	188/83	1		1	BTB-00027638	1	2	REC	4/7	63/208	0.2976
1	ARS-BFGL-NGS-111569	65792796	1	0.5	0.4151	2	0.51	1.409		1	ARS-BFGL-NGS-111569	1	2	DOM	8/3	178/93	0.7545		1	ARS-BFGL-NGS-111569	1	2	REC	3/8	47/224	0.4182
1	BovineHD0100018708	65801483	2	0.3636	0.466	1	0.3891	0.6547		1	BovineHD0100018708	2	1	DOM	6/5	199/66	0.1575		1	BovineHD0100018708	2	1	REC	2/9	48/217	1
1	BovineHD0100018723	65838513	2	0.5	0.4151	1	0.51	1.409		1	BovineHD0100018723	2	1	DOM	8/3	178/93	0.7545		1	BovineHD0100018723	2	1	REC	3/8	47/224	0.4182
1	BovineHD0100018775	65943436	2	0.4091	0.4185	1	1	0.9619		1	BovineHD0100018775	2	1	DOM	7/4	186/84	0.7448		1	BovineHD0100018775	2	1	REC	2/9	40/230	0.6719
1	BovineHD0100018783	65952684	2	0.4091	0.3284	1	0.4895	1.416		1	BovineHD0100018783	2	1	DOM	7/4	152/116	0.7624		1	BovineHD0100018783	2	1	REC	2/9	24/244	0.2731
1	BTA-33604-no-rs	66059883	1	0.4091	0.4188	2	1	0.9607		1	BTA-33604-no-rs	1	2	DOM	7/4	186/85	0.7462		1	BTA-33604-no-rs	1	2	REC	2/9	41/230	0.6772
1	ARS-BFGL-NGS-117561	66087781	2	0.4091	0.3339	1	0.4938	1.381		1	ARS-BFGL-NGS-117561	2	1	DOM	7/4	153/118	0.7618		1	ARS-BFGL-NGS-117561	2	1	REC	2/9	28/243	0.3303
1	BovineHD0100018849	66092451	1	0.2273	0.2463	2	1	0.9002		1	BovineHD0100018849	1	2	DOM	5/6	111/157	0.767		1	BovineHD0100018849	1	2	REC	0/11	21/247	1
1	ARS-BFGL-NGS-14087	66112842	2	0.04545	0.06273	1	1	0.7115		1	ARS-BFGL-NGS-14087	2	1	DOM	1/10	33/238	1		1	ARS-BFGL-NGS-14087	2	1	REC	0/11	1/270	1
1	BovineHD4100000370	66133173	1	0.3636	0.3513	2	1	1.055		1	BovineHD4100000370	1	2	DOM	6/5	157/112	1		1	BovineHD4100000370	1	2	REC	2/9	32/237	0.629
1	Hapmap54041-ss46526276	66150690	1	0.4545	0.3948	2	0.6582	1.277		1	Hapmap54041-ss46526276	1	2	DOM	8/3	176/95	0.7528		1	Hapmap54041-ss46526276	1	2	REC	2/9	38/233	0.659
1	BovineHD0100018869	66184432	1	0.4545	0.3289	2	0.2506	1.7		1	BovineHD0100018869	1	2	DOM	8/3	154/109	0.5336		1	BovineHD0100018869	1	2	REC	2/9	19/244	0.2024
1	ARS-BFGL-NGS-36705	66188904	2	0.1818	0.1771	1	1	1.032		1	ARS-BFGL-NGS-36705	2	1	DOM	4/7	86/185	0.7483		1	ARS-BFGL-NGS-36705	2	1	REC	0/11	10/261	1
1	BovineHD0100018875	66211180	2	0.3636	0.4871	1	0.2836	0.6017		1	BovineHD0100018875	2	1	DOM	6/5	208/63	0.1417		1	BovineHD0100018875	2	1	REC	2/9	56/215	1
1	Hapmap51211-BTA-33586	66258464	2	0.04545	0.03321	1	0.5363	1.386		1	Hapmap51211-BTA-33586	2	1	DOM	1/10	18/253	0.5424		1	Hapmap51211-BTA-33586	2	1	REC	0/11	0/271	1
1	BovineHD0100018903	66364954	2	0.1818	0.1089	1	0.2932	1.819		1	BovineHD0100018903	2	1	DOM	4/7	57/214	0.2601		1	BovineHD0100018903	2	1	REC	0/11	2/269	1
1	BovineHD0100018914	66441391	2	0.04545	0.2159	1	0.06049	0.173		1	BovineHD0100018914	2	1	DOM	1/10	104/167	0.0584		1	BovineHD0100018914	2	1	REC	0/11	13/258	1
1	ARS-BFGL-NGS-103348	66454562	2	0.04545	0.02399	1	0.4309	1.938		1	ARS-BFGL-NGS-103348	2	1	DOM	1/10	13/258	0.4348		1	ARS-BFGL-NGS-103348	2	1	REC	0/11	0/271	1
1	BTB-00032648	66515809	1	0.2273	0.19	2	0.5898	1.254		1	BTB-00032648	1	2	DOM	4/7	95/176	1		1	BTB-00032648	1	2	REC	1/10	8/263	0.3047
1	BovineHD0100018938	66539914	1	0.5909	0.441	2	0.1923	1.831		1	BovineHD0100018938	1	2	DOM	10/1	182/89	0.1829		1	BovineHD0100018938	1	2	REC	3/8	57/214	0.7061
1	BTB-00033186	66560130	2	0.2727	0.4834	1	0.07936	0.4008		1	BTB-00033186	2	1	DOM	5/6	197/74	0.08097		1	BTB-00033186	2	1	REC	1/10	65/206	0.4672
1	ARS-BFGL-NGS-4572	66612166	1	0.5	0.4539	2	0.6701	1.203		1	ARS-BFGL-NGS-4572	1	2	DOM	9/2	193/78	0.7338		1	ARS-BFGL-NGS-4572	1	2	REC	2/9	53/218	1
1	BTB-00032574	66657113	2	0.1364	0.08118	1	0.4166	1.787		1	BTB-00032574	2	1	DOM	3/8	44/227	0.4006		1	BTB-00032574	2	1	REC	0/11	0/271	1
1	ARS-BFGL-NGS-6075	66686171	2	0.4091	0.321	1	0.486	1.464		1	ARS-BFGL-NGS-6075	2	1	DOM	7/4	153/118	0.7618		1	ARS-BFGL-NGS-6075	2	1	REC	2/9	21/250	0.2231
1	BTB-00026096	66710186	1	0.4091	0.3524	2	0.651	1.272		1	BTB-00026096	1	2	DOM	7/4	163/108	1		1	BTB-00026096	1	2	REC	2/9	28/243	0.3303
1	BTB-00026110	66731706	2	0.1364	0.07934	1	0.4119	1.832		1	BTB-00026110	2	1	DOM	2/9	41/230	0.6772		1	BTB-00026110	2	1	REC	1/10	2/269	0.1129
1	BTA-31636-no-rs	66799487	2	0.3636	0.3782	1	1	0.9394		1	BTA-31636-no-rs	2	1	DOM	6/5	171/100	0.5449		1	BTA-31636-no-rs	2	1	REC	2/9	34/237	0.6373
1	BTA-05186-no-rs	66862192	2	0.1818	0.2066	1	1	0.8532		1	BTA-05186-no-rs	2	1	DOM	3/8	103/168	0.5441		1	BTA-05186-no-rs	2	1	REC	1/10	9/262	0.3327
1	BTB-00028704	66890930	2	0.1818	0.1531	1	0.7617	1.229		1	BTB-00028704	2	1	DOM	3/8	77/194	1		1	BTB-00028704	2	1	REC	1/10	6/265	0.2454
1	BovineHD0100019073	67069288	1	0.09091	0.1089	2	1	0.8186		1	BovineHD0100019073	1	2	DOM	2/9	55/216	1		1	BovineHD0100019073	1	2	REC	0/11	4/267	1
1	UA-IFASA-7116	67101935	2	0.1818	0.1144	1	0.3109	1.72		1	UA-IFASA-7116	2	1	DOM	4/7	59/212	0.2715		1	UA-IFASA-7116	2	1	REC	0/11	3/268	1
1	BTB-00032205	67133845	1	0.1818	0.1365	2	0.528	1.405		1	BTB-00032205	1	2	DOM	4/7	70/201	0.4867		1	BTB-00032205	1	2	REC	0/11	4/267	1
1	BTB-00032200	67163792	2	0.2273	0.2897	1	0.636	0.7212		1	BTB-00032200	2	1	DOM	5/6	139/132	0.7658		1	BTB-00032200	2	1	REC	0/11	18/253	1
1	BTB-00032163	67192418	1	0.5455	0.4207	2	0.2757	1.653		1	BTB-00032163	1	2	DOM	8/3	179/92	0.7555		1	BTB-00032163	1	2	REC	4/7	49/222	0.1313
1	BTB-00032153	67213671	1	0.1818	0.1808	2	1	1.007		1	BTB-00032153	1	2	DOM	3/8	90/181	1		1	BTB-00032153	1	2	REC	1/10	8/263	0.3047
1	BovineHD0100019121	67264350	2	0.2727	0.3396	1	0.6477	0.7294		1	BovineHD0100019121	2	1	DOM	5/6	155/113	0.5371		1	BovineHD0100019121	2	1	REC	1/10	27/241	1
1	Hapmap58284-rs29018937	67284880	1	0.5	0.3801	2	0.2706	1.631		1	Hapmap58284-rs29018937	1	2	DOM	7/4	164/107	1		1	Hapmap58284-rs29018937	1	2	REC	4/7	42/229	0.08553
1	BTA-33571-no-rs	67309126	1	0.1818	0.1808	2	1	1.007		1	BTA-33571-no-rs	1	2	DOM	3/8	90/181	1		1	BTA-33571-no-rs	1	2	REC	1/10	8/263	0.3047
1	BovineHD0100019150	67330069	2	0.4091	0.4871	1	0.52	0.729		1	BovineHD0100019150	2	1	DOM	7/4	210/61	0.284		1	BovineHD0100019150	2	1	REC	2/9	54/217	1
1	ARS-BFGL-NGS-119133	67369224	1	0.1364	0.2528	2	0.314	0.4668		1	ARS-BFGL-NGS-119133	1	2	DOM	3/8	124/147	0.3552		1	ARS-BFGL-NGS-119133	1	2	REC	0/11	13/258	1
1	Hapmap41826-BTA-31654	67423265	2	0.4545	0.4576	1	1	0.9879		1	Hapmap41826-BTA-31654	2	1	DOM	8/3	193/78	1		1	Hapmap41826-BTA-31654	2	1	REC	2/9	55/216	1
1	BovineHD0100019190	67444738	1	0.09091	0.1343	2	0.7544	0.6444		1	BovineHD0100019190	1	2	DOM	2/9	71/197	0.7335		1	BovineHD0100019190	1	2	REC	0/11	1/267	1
1	ARS-BFGL-NGS-117312	67466120	1	0.5455	0.4705	2	0.5205	1.351		1	ARS-BFGL-NGS-117312	1	2	DOM	9/2	206/65	1		1	ARS-BFGL-NGS-117312	1	2	REC	3/8	49/222	0.4315
1	BovineHD0100019214	67502529	1	0.5455	0.3616	2	0.1125	2.118		1	BovineHD0100019214	1	2	DOM	8/3	168/103	0.5441		1	BovineHD0100019214	1	2	REC	4/7	28/243	0.02559
1	Hapmap59754-rs29024892	67577109	2	0.3182	0.3856	1	0.6563	0.7435		1	Hapmap59754-rs29024892	2	1	DOM	5/6	173/98	0.2219		1	Hapmap59754-rs29024892	2	1	REC	2/9	36/235	0.6477
1	ARS-BFGL-NGS-7521	67672926	1	0.3636	0.4299	2	0.6619	0.7578		1	ARS-BFGL-NGS-7521	1	2	DOM	6/5	186/85	0.3362		1	ARS-BFGL-NGS-7521	1	2	REC	2/9	47/224	1
1	ARS-BFGL-NGS-4503	67711822	2	0.5909	0.4649	1	0.2804	1.662		1	ARS-BFGL-NGS-4503	2	1	DOM	9/2	197/74	0.7328		1	ARS-BFGL-NGS-4503	2	1	REC	4/7	55/216	0.25
1	BovineHD0100019327	67798278	1	0.3636	0.2668	2	0.3309	1.57		1	BovineHD0100019327	1	2	DOM	6/5	126/142	0.761		1	BovineHD0100019327	1	2	REC	2/9	17/251	0.1673
1	Hapmap46988-BTA-34591	67805608	1	0.1364	0.1347	2	1	1.014		1	Hapmap46988-BTA-34591	1	2	DOM	3/8	67/204	1		1	Hapmap46988-BTA-34591	1	2	REC	0/11	6/265	1
1	ARS-BFGL-NGS-111491	67859165	2	0.4091	0.3635	1	0.6577	1.212		1	ARS-BFGL-NGS-111491	2	1	DOM	7/4	164/107	1		1	ARS-BFGL-NGS-111491	2	1	REC	2/9	33/238	0.6325
1	Hapmap50666-BTA-34589	67935062	2	0.4091	0.3635	1	0.6577	1.212		1	Hapmap50666-BTA-34589	2	1	DOM	7/4	164/107	1		1	Hapmap50666-BTA-34589	2	1	REC	2/9	33/238	0.6325
1	Hapmap39647-BTA-34584	68006692	2	0.1364	0.1365	1	1	0.9986		1	Hapmap39647-BTA-34584	2	1	DOM	3/8	67/204	1		1	Hapmap39647-BTA-34584	2	1	REC	0/11	7/264	1
1	BovineHD0100019390	68014145	1	0.5909	0.4944	2	0.3941	1.477		1	BovineHD0100019390	1	2	DOM	10/1	199/71	0.2995		1	BovineHD0100019390	1	2	REC	3/8	68/202	1
1	BovineHD0100019406	68043046	2	0.1818	0.07463	1	0.08624	2.756		1	BovineHD0100019406	2	1	DOM	3/8	40/228	0.384		1	BovineHD0100019406	2	1	REC	1/10	0/268	0.03943
1	BovineHD0100019431	68110104	2	0.04545	0.04244	1	1	1.075		1	BovineHD0100019431	2	1	DOM	1/10	22/249	1		1	BovineHD0100019431	2	1	REC	0/11	1/270	1
1	BovineHD0100019449	68187404	1	0.4091	0.3526	2	0.651	1.271		1	BovineHD0100019449	1	2	DOM	7/4	149/119	0.7601		1	BovineHD0100019449	1	2	REC	2/9	40/228	0.6737
1	BovineHD0100019456	68229277	2	0.4545	0.4373	1	1	1.072		1	BovineHD0100019456	2	1	DOM	8/3	180/91	0.7568		1	BovineHD0100019456	2	1	REC	2/9	57/214	1
1	BovineHD0100019464	68248079	1	0.3182	0.2729	2	0.6306	1.243		1	BovineHD0100019464	1	2	DOM	6/5	118/144	0.5539		1	BovineHD0100019464	1	2	REC	1/10	25/237	1
1	BovineHD0100019472	68267076	1	0.4091	0.4422	2	0.8292	0.8734		1	BovineHD0100019472	1	2	DOM	8/3	188/80	1		1	BovineHD0100019472	1	2	REC	1/10	49/219	0.6952
1	ARS-BFGL-NGS-31379	68286354	1	0.4545	0.4613	2	1	0.9733		1	ARS-BFGL-NGS-31379	1	2	DOM	9/2	196/75	0.7328		1	ARS-BFGL-NGS-31379	1	2	REC	1/10	54/217	0.6976
1	BovineHD0100019485	68293671	2	0.04545	0.01908	1	0.3666	2.448		1	BovineHD0100019485	2	1	DOM	1/10	10/252	0.3694		1	BovineHD0100019485	2	1	REC	0/11	0/262	1
1	BovineHD0100019488	68304713	1	0.4545	0.4557	2	1	0.9953		1	BovineHD0100019488	1	2	DOM	9/2	193/78	0.7338		1	BovineHD0100019488	1	2	REC	1/10	54/217	0.6976
1	ARS-BFGL-NGS-26771	68417680	1	0.3636	0.3376	2	0.8203	1.121		1	ARS-BFGL-NGS-26771	1	2	DOM	7/4	151/120	0.7604		1	ARS-BFGL-NGS-26771	1	2	REC	1/10	32/239	1
1	ARS-BFGL-NGS-100745	68440795	2	0.4545	0.441	1	1	1.056		1	ARS-BFGL-NGS-100745	2	1	DOM	7/4	184/87	0.7506		1	ARS-BFGL-NGS-100745	2	1	REC	3/8	55/216	0.702
1	BTA-120514-no-rs	68465551	2	0.1818	0.1624	1	0.7698	1.146		1	BTA-120514-no-rs	2	1	DOM	4/7	81/190	0.7391		1	BTA-120514-no-rs	2	1	REC	0/11	7/264	1
1	BovineHD0100019566	68492520	2	0.5455	0.4945	1	0.6696	1.227		1	BovineHD0100019566	2	1	DOM	9/2	200/71	0.7341		1	BovineHD0100019566	2	1	REC	3/8	68/203	1
1	Hapmap54911-rs29023069	68532921	1	0.5	0.4982	2	1	1.007		1	Hapmap54911-rs29023069	1	2	DOM	8/3	201/70	1		1	Hapmap54911-rs29023069	1	2	REC	3/8	69/202	1
1	BovineHD0100019589	68572324	1	0.3182	0.3081	2	1	1.048		1	BovineHD0100019589	1	2	DOM	5/6	141/130	0.7634		1	BovineHD0100019589	1	2	REC	2/9	26/245	0.2995
1	ARS-BFGL-NGS-118460	68596030	2	0.1364	0.1421	1	1	0.9535		1	ARS-BFGL-NGS-118460	2	1	DOM	3/8	74/197	1		1	ARS-BFGL-NGS-118460	2	1	REC	0/11	3/268	1
1	ARS-BFGL-NGS-118306	68623214	1	0.3182	0.3118	2	1	1.03		1	ARS-BFGL-NGS-118306	1	2	DOM	5/6	143/128	0.7615		1	ARS-BFGL-NGS-118306	1	2	REC	2/9	26/245	0.2995
1	ARS-BFGL-NGS-114985	68682461	1	0.4545	0.4096	2	0.6661	1.201		1	ARS-BFGL-NGS-114985	1	2	DOM	7/4	178/93	1		1	ARS-BFGL-NGS-114985	1	2	REC	3/8	44/227	0.4006
1	BovineHD0100019679	68712546	2	0.4545	0.3967	1	0.6588	1.267		1	BovineHD0100019679	2	1	DOM	7/4	175/96	1		1	BovineHD0100019679	2	1	REC	3/8	40/231	0.3824
1	BTA-104027-no-rs	68757940	1	0.1818	0.1015	2	0.273	1.968		1	BTA-104027-no-rs	1	2	DOM	4/7	51/220	0.2338		1	BTA-104027-no-rs	1	2	REC	0/11	4/267	1
1	BovineHD0100019701	68778928	2	0.1818	0.1455	1	0.5488	1.305		1	BovineHD0100019701	2	1	DOM	3/8	70/198	1		1	BovineHD0100019701	2	1	REC	1/10	8/260	0.3075
1	ARS-BFGL-NGS-115898	68784544	1	0.6364	0.4908	2	0.1983	1.816		1	ARS-BFGL-NGS-115898	1	2	DOM	9/2	203/68	1		1	ARS-BFGL-NGS-115898	1	2	REC	5/6	63/208	0.1417
1	BovineHD0100019706	68792344	2	0.04545	0.02037	1	0.3837	2.29		1	BovineHD0100019706	2	1	DOM	1/10	11/259	0.3868		1	BovineHD0100019706	2	1	REC	0/11	0/270	1
1	BovineHD0100019715	68801039	1	0.1818	0.1421	2	0.5404	1.342		1	BovineHD0100019715	1	2	DOM	4/7	69/202	0.4832		1	BovineHD0100019715	1	2	REC	0/11	8/263	1
1	AX-18260553	68863963	1	0.2727	0.2454	2	0.8015	1.153		1	AX-18260553	1	2	DOM	5/6	116/155	1		1	AX-18260553	1	2	REC	1/10	17/254	0.5225
1	Hapmap38055-BTA-120751	68873131	2	0.1364	0.1255	1	0.7492	1.101		1	Hapmap38055-BTA-120751	2	1	DOM	3/8	65/206	0.7298		1	Hapmap38055-BTA-120751	2	1	REC	0/11	3/268	1
1	BovineHD0100019760	68874880	1	0.3182	0.2407	2	0.4473	1.472		1	BovineHD0100019760	1	2	DOM	6/5	113/155	0.5371		1	BovineHD0100019760	1	2	REC	1/10	16/252	0.5057
1	BovineHD0100019784	68908189	1	0.2727	0.2306	2	0.6123	1.251		1	BovineHD0100019784	1	2	DOM	5/6	110/161	0.7628		1	BovineHD0100019784	1	2	REC	1/10	15/256	0.4803
1	BovineHD0100019804	68949628	2	0.1818	0.08889	1	0.1365	2.278		1	BovineHD0100019804	2	1	DOM	3/8	47/223	0.4193		1	BovineHD0100019804	2	1	REC	1/10	1/269	0.07689
1	BovineHD0100019809	68970032	2	0.2273	0.1963	1	0.7841	1.204		1	BovineHD0100019809	2	1	DOM	4/7	96/174	1		1	BovineHD0100019809	2	1	REC	1/10	10/260	0.3607
1	BovineHD0100019833	69009235	1	0.04545	0.02952	2	0.4966	1.565		1	BovineHD0100019833	1	2	DOM	1/10	15/256	0.4803		1	BovineHD0100019833	1	2	REC	0/11	1/270	1
1	BovineHD0100019834	69009734	1	0.04545	0.03731	2	0.5771	1.229		1	BovineHD0100019834	1	2	DOM	1/10	20/248	0.5841		1	BovineHD0100019834	1	2	REC	0/11	0/268	1
1	BovineHD0100019837	69012232	2	0.04545	0.02399	1	0.4309	1.938		1	BovineHD0100019837	2	1	DOM	1/10	13/258	0.4348		1	BovineHD0100019837	2	1	REC	0/11	0/271	1
1	BTA-33563-no-rs	69016673	2	0.3636	0.4299	1	0.6619	0.7578		1	BTA-33563-no-rs	2	1	DOM	8/3	190/81	1		1	BTA-33563-no-rs	2	1	REC	0/11	43/228	0.2254
1	BovineHD0100019855	69033809	2	0.04545	0.02052	1	0.3859	2.273		1	BovineHD0100019855	2	1	DOM	1/10	11/257	0.389		1	BovineHD0100019855	2	1	REC	0/11	0/268	1
1	ARS-USDA-AGIL-chr1-69652189-000148	69047241	1	0.04545	0.0203	2	0.3826	2.299		1	ARS-USDA-AGIL-chr1-69652189-000148	1	2	DOM	1/10	11/260	0.3857		1	ARS-USDA-AGIL-chr1-69652189-000148	1	2	REC	0/11	0/271	1
1	BovineHD0100019878	69055817	2	0.04545	0.0203	1	0.3826	2.299		1	BovineHD0100019878	2	1	DOM	1/10	11/260	0.3857		1	BovineHD0100019878	2	1	REC	0/11	0/271	1
1	Hapmap59820-rs29019798	69085458	2	0.4545	0.4262	1	0.8284	1.122		1	Hapmap59820-rs29019798	2	1	DOM	9/2	179/92	0.3465		1	Hapmap59820-rs29019798	2	1	REC	1/10	52/219	0.6959
1	BovineHD0100019911	69102381	2	0.04545	0.02222	1	0.4084	2.095		1	BovineHD0100019911	2	1	DOM	1/10	12/258	0.4119		1	BovineHD0100019911	2	1	REC	0/11	0/270	1
1	BovineHD0100019936	69152362	1	0.1364	0.1287	2	0.7551	1.069		1	BovineHD0100019936	1	2	DOM	3/8	66/202	0.7362		1	BovineHD0100019936	1	2	REC	0/11	3/265	1
1	BovineHD0100019980	69234197	2	0.1364	0.2601	1	0.2234	0.449		1	BovineHD0100019980	2	1	DOM	3/8	123/148	0.3555		1	BovineHD0100019980	2	1	REC	0/11	18/253	1
1	ARS-BFGL-NGS-62687	69262270	2	0.3636	0.4244	1	0.663	0.7752		1	ARS-BFGL-NGS-62687	2	1	DOM	6/5	178/93	0.5225		1	ARS-BFGL-NGS-62687	2	1	REC	2/9	52/219	1
1	BovineHD0100019998	69266076	2	0.4545	0.4649	1	1	0.959		1	BovineHD0100019998	2	1	DOM	8/3	186/85	1		1	BovineHD0100019998	2	1	REC	2/9	66/205	1
1	BovineHD0100020014	69294780	2	0.3182	0.2761	1	0.634	1.223		1	BovineHD0100020014	2	1	DOM	5/6	129/139	1		1	BovineHD0100020014	2	1	REC	2/9	19/249	0.1967
1	ARS-BFGL-NGS-111716	69299662	1	0.3636	0.4373	2	0.521	0.7354		1	ARS-BFGL-NGS-111716	1	2	DOM	6/5	181/90	0.5164		1	ARS-BFGL-NGS-111716	1	2	REC	2/9	56/215	1
1	BovineHD0100020025	69320032	1	0.4091	0.3463	2	0.6487	1.307		1	BovineHD0100020025	1	2	DOM	8/3	156/114	0.3704		1	BovineHD0100020025	1	2	REC	1/10	31/239	1
1	BovineHD0100020044	69372317	2	0.4091	0.3432	1	0.5033	1.325		1	BovineHD0100020044	2	1	DOM	6/5	153/118	1		1	BovineHD0100020044	2	1	REC	3/8	33/238	0.1532
1	BovineHD0100020072	69488001	2	0.2727	0.3284	1	0.6509	0.7669		1	BovineHD0100020072	2	1	DOM	6/5	150/121	1		1	BovineHD0100020072	2	1	REC	0/11	28/243	0.6092
1	BovineHD0100020089	69551363	1	0.04545	0.04613	2	1	0.9848		1	BovineHD0100020089	1	2	DOM	1/10	24/247	1		1	BovineHD0100020089	1	2	REC	0/11	1/270	1
1	ARS-BFGL-NGS-111271	69554315	2	0.2273	0.2675	1	0.8086	0.8053		1	ARS-BFGL-NGS-111271	2	1	DOM	5/6	130/141	1		1	ARS-BFGL-NGS-111271	2	1	REC	0/11	15/256	1
1	BovineHD0100020090	69554797	1	0.4091	0.3717	2	0.8227	1.17		1	BovineHD0100020090	1	2	DOM	6/5	161/108	0.7607		1	BovineHD0100020090	1	2	REC	3/8	39/230	0.2184
1	ARS-BFGL-NGS-111283	69585403	1	0.4091	0.4077	2	1	1.006		1	ARS-BFGL-NGS-111283	1	2	DOM	9/2	183/88	0.5116		1	ARS-BFGL-NGS-111283	1	2	REC	0/11	38/233	0.3703
1	BovineHD0100020110	69613858	2	0.3636	0.3593	1	1	1.019		1	BovineHD0100020110	2	1	DOM	8/3	165/105	0.5394		1	BovineHD0100020110	2	1	REC	0/11	29/241	0.6113
1	BovineHD0100020122	69664149	2	0.1818	0.3444	1	0.1662	0.4229		1	BovineHD0100020122	2	1	DOM	4/7	160/110	0.2103		1	BovineHD0100020122	2	1	REC	0/11	26/244	0.6069
1	BovineHD0100020138	69748359	2	0.1364	0.2288	1	0.4368	0.5323		1	BovineHD0100020138	2	1	DOM	2/9	108/163	0.2112		1	BovineHD0100020138	2	1	REC	1/10	16/255	0.5018
1	ARS-BFGL-NGS-103803	69802244	2	0.5909	0.3967	1	0.07843	2.197		1	ARS-BFGL-NGS-103803	2	1	DOM	9/2	179/92	0.3465		1	ARS-BFGL-NGS-103803	2	1	REC	4/7	36/235	0.05467
1	BovineHD0100020162	69859758	1	0.3182	0.3	2	0.8165	1.089		1	BovineHD0100020162	1	2	DOM	7/4	141/129	0.5473		1	BovineHD0100020162	1	2	REC	0/11	21/249	1
1	Hapmap41227-BTA-32644	69870271	2	0.2273	0.2509	1	1	0.878		1	Hapmap41227-BTA-32644	2	1	DOM	5/6	119/152	1		1	Hapmap41227-BTA-32644	2	1	REC	0/11	17/254	1
1	BovineHD0100020179	69931914	1	0.5455	0.4154	2	0.2721	1.689		1	BovineHD0100020179	1	2	DOM	8/3	174/92	0.7537		1	BovineHD0100020179	1	2	REC	4/7	47/219	0.1235
1	Hapmap39468-BTA-120746	69942383	1	0.2273	0.2519	2	1	0.8737		1	Hapmap39468-BTA-120746	1	2	DOM	5/6	119/151	1		1	Hapmap39468-BTA-120746	1	2	REC	0/11	17/253	1
1	BovineHD0100020187	69979144	2	0.5455	0.4185	1	0.2741	1.667		1	BovineHD0100020187	2	1	DOM	8/3	178/92	0.7551		1	BovineHD0100020187	2	1	REC	4/7	48/222	0.1254
1	BovineHD0100020191	70001473	2	0.2273	0.1648	1	0.3924	1.491		1	BovineHD0100020191	2	1	DOM	5/6	81/186	0.3239		1	BovineHD0100020191	2	1	REC	0/11	7/260	1
1	BTB-00031796	70049185	2	0.2273	0.2472	1	1	0.8955		1	BTB-00031796	2	1	DOM	5/6	117/154	1		1	BTB-00031796	2	1	REC	0/11	17/254	1
1	Hapmap59145-ss46526952	70228691	2	0.4091	0.2897	1	0.2379	1.698		1	Hapmap59145-ss46526952	2	1	DOM	8/3	143/128	0.2305		1	Hapmap59145-ss46526952	2	1	REC	1/10	14/257	0.458
1	Hapmap50667-BTA-34616	70362584	2	0.1364	0.1974	1	0.5934	0.6419		1	Hapmap50667-BTA-34616	2	1	DOM	3/8	96/175	0.7522		1	Hapmap50667-BTA-34616	2	1	REC	0/11	11/260	1
1	ARS-BFGL-NGS-80523	70384365	1	0.5455	0.4834	2	0.6653	1.282		1	ARS-BFGL-NGS-80523	1	2	DOM	9/2	196/75	0.7328		1	ARS-BFGL-NGS-80523	1	2	REC	3/8	66/205	0.7335
1	BovineHD0100020322	70392743	2	0.4091	0.3074	1	0.3492	1.56		1	BovineHD0100020322	2	1	DOM	8/3	148/122	0.3558		1	BovineHD0100020322	2	1	REC	1/10	18/252	0.5437
1	BovineHD0100020325	70398856	2	0.5455	0.3941	1	0.1843	1.845		1	BovineHD0100020325	2	1	DOM	9/2	175/94	0.3413		1	BovineHD0100020325	2	1	REC	3/8	37/232	0.1967
1	BovineHD0100020329	70404106	1	0.5455	0.3963	2	0.1859	1.828		1	BovineHD0100020329	1	2	DOM	9/2	176/94	0.3419		1	BovineHD0100020329	1	2	REC	3/8	38/232	0.2059
1	BovineHD0100020334	70412669	2	0.5455	0.3941	1	0.1843	1.845		1	BovineHD0100020334	2	1	DOM	9/2	175/94	0.3413		1	BovineHD0100020334	2	1	REC	3/8	37/232	0.1967
1	BovineHD0100020342	70429089	1	0.2273	0.1283	2	0.1935	1.999		1	BovineHD0100020342	1	2	DOM	5/6	64/205	0.1463		1	BovineHD0100020342	1	2	REC	0/11	5/264	1
1	ARS-BFGL-NGS-119161	70459221	2	0.3636	0.4834	1	0.2866	0.6107		1	ARS-BFGL-NGS-119161	2	1	DOM	8/3	197/74	1		1	ARS-BFGL-NGS-119161	2	1	REC	0/11	65/206	0.07379
1	BovineHD0100020373	70493042	2	0.4545	0.4275	1	0.8287	1.116		1	BovineHD0100020373	2	1	DOM	8/3	186/83	1		1	BovineHD0100020373	2	1	REC	2/9	44/225	1
1	BovineHD0100020392	70523321	2	0.3636	0.4925	1	0.28	0.5887		1	BovineHD0100020392	2	1	DOM	8/3	199/69	1		1	BovineHD0100020392	2	1	REC	0/11	65/203	0.073
1	BovineHD0100020393	70527905	1	0.2727	0.2325	2	0.6147	1.238		1	BovineHD0100020393	1	2	DOM	5/6	110/161	0.7628		1	BovineHD0100020393	1	2	REC	1/10	16/255	0.5018
1	BovineHD0100020394	70532358	2	0.1818	0.3086	1	0.2444	0.498		1	BovineHD0100020394	2	1	DOM	4/7	148/121	0.3551		1	BovineHD0100020394	2	1	REC	0/11	18/251	1
1	BovineHD0100020415	70559726	1	0.2727	0.3653	2	0.4986	0.6515		1	BovineHD0100020415	1	2	DOM	6/5	173/98	0.5374		1	BovineHD0100020415	1	2	REC	0/11	25/246	0.6067
1	ARS-BFGL-NGS-95516	70621981	2	0.4091	0.369	1	0.8223	1.184		1	ARS-BFGL-NGS-95516	2	1	DOM	7/4	168/103	1		1	ARS-BFGL-NGS-95516	2	1	REC	2/9	32/239	0.628
1	ARS-BFGL-NGS-5124	70656139	1	0.5455	0.4834	2	0.6653	1.282		1	ARS-BFGL-NGS-5124	1	2	DOM	10/1	205/66	0.4685		1	ARS-BFGL-NGS-5124	1	2	REC	2/9	57/214	1
1	BovineHD0100020477	70735271	2	0.09091	0.04428	1	0.2692	2.158		1	BovineHD0100020477	2	1	DOM	2/9	24/247	0.2688		1	BovineHD0100020477	2	1	REC	0/11	0/271	1
1	ARS-BFGL-BAC-35332	70741856	2	0.4091	0.3376	1	0.4972	1.358		1	ARS-BFGL-BAC-35332	2	1	DOM	8/3	156/115	0.3688		1	ARS-BFGL-BAC-35332	2	1	REC	1/10	27/244	1
1	ARS-BFGL-NGS-97095	70823693	2	0.3182	0.2232	1	0.3025	1.624		1	ARS-BFGL-NGS-97095	2	1	DOM	7/4	112/159	0.212		1	ARS-BFGL-NGS-97095	2	1	REC	0/11	9/262	1
1	Hapmap43841-BTA-34601	70897439	1	0.4091	0.4779	2	0.6643	0.7565		1	Hapmap43841-BTA-34601	1	2	DOM	7/4	200/71	0.4905		1	Hapmap43841-BTA-34601	1	2	REC	2/9	59/212	1
1	AX-18269003	70935289	1	0.2727	0.1956	2	0.4116	1.542		1	AX-18269003	1	2	DOM	5/6	95/176	0.5277		1	AX-18269003	1	2	REC	1/10	11/260	0.3857
1	AX-18269029	70941629	1	0.2727	0.1956	2	0.4116	1.542		1	AX-18269029	1	2	DOM	5/6	95/176	0.5277		1	AX-18269029	1	2	REC	1/10	11/260	0.3857
1	BovineHD0100020535	70973829	2	0.2727	0.1937	1	0.4093	1.561		1	BovineHD0100020535	2	1	DOM	5/6	94/177	0.525		1	BovineHD0100020535	2	1	REC	1/10	11/260	0.3857
1	BovineHD0100020540	70987820	2	0.3182	0.2407	1	0.4473	1.472		1	BovineHD0100020540	2	1	DOM	6/5	111/157	0.535		1	BovineHD0100020540	2	1	REC	1/10	18/250	0.5464
1	Hapmap40324-BTA-34602	70995564	2	0.2727	0.1937	1	0.4093	1.561		1	Hapmap40324-BTA-34602	2	1	DOM	5/6	94/177	0.525		1	Hapmap40324-BTA-34602	2	1	REC	1/10	11/260	0.3857
1	BTA-34631-no-rs	71013954	1	0.09091	0.2111	2	0.2795	0.3737		1	BTA-34631-no-rs	1	2	DOM	2/9	100/170	0.3379		1	BTA-34631-no-rs	1	2	REC	0/11	14/256	1
1	BovineHD0100020549	71042439	2	0.1818	0.2332	1	0.7968	0.7307		1	BovineHD0100020549	2	1	DOM	4/7	111/157	1		1	BovineHD0100020549	2	1	REC	0/11	14/254	1
1	BovineHD0100020557	71067483	1	0.2273	0.3007	2	0.6351	0.6839		1	BovineHD0100020557	1	2	DOM	4/7	135/136	0.5411		1	BovineHD0100020557	1	2	REC	1/10	28/243	1
1	BovineHD0100020562	71083170	2	0.09091	0.1439	1	0.7551	0.5949		1	BovineHD0100020562	2	1	DOM	2/9	75/196	0.7328		1	BovineHD0100020562	2	1	REC	0/11	3/268	1
1	ARS-BFGL-NGS-56509	71132759	2	0.4545	0.3118	1	0.1665	1.839		1	ARS-BFGL-NGS-56509	2	1	DOM	8/3	140/131	0.2238		1	ARS-BFGL-NGS-56509	2	1	REC	2/9	29/242	0.3456
1	ARS-BFGL-NGS-16910	71155649	1	0.09091	0.1421	2	0.7547	0.6039		1	ARS-BFGL-NGS-16910	1	2	DOM	2/9	74/197	0.7328		1	ARS-BFGL-NGS-16910	1	2	REC	0/11	3/268	1
1	BovineHD0100020591	71163004	2	0.2273	0.1808	1	0.5746	1.333		1	BovineHD0100020591	2	1	DOM	5/6	90/181	0.5164		1	BovineHD0100020591	2	1	REC	0/11	8/263	1
1	BovineHD0100020593	71170757	1	0.2273	0.2707	2	0.8082	0.7925		1	BovineHD0100020593	1	2	DOM	5/6	135/131	0.7678		1	BovineHD0100020593	1	2	REC	0/11	9/257	1
1	BTA-34638-no-rs	71190486	1	0.4091	0.4539	2	0.8278	0.833		1	BTA-34638-no-rs	1	2	DOM	7/4	192/79	0.7365		1	BTA-34638-no-rs	1	2	REC	2/9	54/217	1
1	BovineHD0100020624	71301132	2	0.09091	0.1426	1	0.7548	0.6013		1	BovineHD0100020624	2	1	DOM	2/9	74/196	0.7328		1	BovineHD0100020624	2	1	REC	0/11	3/267	1
1	BTA-120754-no-rs	71322090	1	0.3182	0.2638	2	0.6232	1.302		1	BTA-120754-no-rs	1	2	DOM	6/5	130/141	0.7634		1	BTA-120754-no-rs	1	2	REC	1/10	13/258	0.4348
1	BovineHD0100020633	71338285	1	0.6818	0.4815	2	0.08171	2.307		1	BovineHD0100020633	1	2	DOM	11/0	195/76	0.03963		1	BovineHD0100020633	1	2	REC	4/7	66/205	0.4744
1	BTA-34624-no-rs	71411178	2	0.3182	0.2638	1	0.6232	1.302		1	BTA-34624-no-rs	2	1	DOM	6/5	130/141	0.7634		1	BTA-34624-no-rs	2	1	REC	1/10	13/258	0.4348
1	Hapmap60655-rs29025422	71442587	2	0.04545	0.131	1	0.3395	0.3159		1	Hapmap60655-rs29025422	2	1	DOM	1/10	64/207	0.4662		1	Hapmap60655-rs29025422	2	1	REC	0/11	7/264	1
1	BovineHD4100000414	71443933	1	0.3636	0.2167	2	0.1173	2.066		1	BovineHD4100000414	1	2	DOM	8/3	110/160	0.05735		1	BovineHD4100000414	1	2	REC	0/11	7/263	1
1	ARS-BFGL-NGS-117761	71471058	2	0.2727	0.2343	1	0.6173	1.225		1	ARS-BFGL-NGS-117761	2	1	DOM	5/6	115/156	1		1	ARS-BFGL-NGS-117761	2	1	REC	1/10	12/259	0.4107
1	ARS-BFGL-NGS-37507	71493393	2	0.09091	0.1426	1	0.7548	0.6013		1	ARS-BFGL-NGS-37507	2	1	DOM	2/9	74/196	0.7328		1	ARS-BFGL-NGS-37507	2	1	REC	0/11	3/267	1
1	BovineHD0100020685	71566792	2	0.4091	0.4777	1	0.6643	0.757		1	BovineHD0100020685	2	1	DOM	7/4	204/65	0.4731		1	BovineHD0100020685	2	1	REC	2/9	53/216	1
1	BovineHD0100020689	71609698	2	0.3636	0.4312	1	0.6617	0.7537		1	BovineHD0100020689	2	1	DOM	8/3	189/80	1		1	BovineHD0100020689	2	1	REC	0/11	43/226	0.2247
1	BovineHD0100020706	71741471	2	0.2727	0.2796	1	1	0.9661		1	BovineHD0100020706	2	1	DOM	4/7	132/138	0.543		1	BovineHD0100020706	2	1	REC	2/9	19/251	0.1944
1	Hapmap51434-BTA-34642	71760764	1	0.2727	0.2343	2	0.6173	1.225		1	Hapmap51434-BTA-34642	1	2	DOM	5/6	115/156	1		1	Hapmap51434-BTA-34642	1	2	REC	1/10	12/259	0.4107
1	ARS-BFGL-NGS-118075	71834357	2	0.5909	0.4686	1	0.2831	1.638		1	ARS-BFGL-NGS-118075	2	1	DOM	11/0	197/74	0.07251		1	ARS-BFGL-NGS-118075	2	1	REC	2/9	57/214	1
1	BovineHD0100020739	71877041	2	0.3182	0.363	1	0.8219	0.819		1	BovineHD0100020739	2	1	DOM	6/5	163/107	0.7586		1	BovineHD0100020739	2	1	REC	1/10	33/237	1
1	BovineHD0100020740	71881432	1	0.1818	0.2632	2	0.4676	0.6222		1	BovineHD0100020740	1	2	DOM	4/7	125/141	0.5515		1	BovineHD0100020740	1	2	REC	0/11	15/251	1
1	BovineHD0100020747	71906154	2	0.4545	0.3848	1	0.5115	1.333		1	BovineHD0100020747	2	1	DOM	9/2	171/98	0.3378		1	BovineHD0100020747	2	1	REC	1/10	36/233	1
1	BovineHD0100020749	71917411	1	0.1818	0.2622	2	0.4682	0.6254		1	BovineHD0100020749	1	2	DOM	4/7	124/143	0.5551		1	BovineHD0100020749	1	2	REC	0/11	16/251	1
1	BovineHD0100020757	71943334	2	0.1364	0.1861	1	0.7799	0.6906		1	BovineHD0100020757	2	1	DOM	3/8	91/175	0.7547		1	BovineHD0100020757	2	1	REC	0/11	8/258	1
1	BovineHD0100020760	71952136	2	0.09091	0.1468	1	0.756	0.581		1	BovineHD0100020760	2	1	DOM	2/9	74/195	0.7327		1	BovineHD0100020760	2	1	REC	0/11	5/264	1
1	BovineHD0100020767	71982562	2	0.1818	0.2948	1	0.34	0.5316		1	BovineHD0100020767	2	1	DOM	4/7	133/135	0.5413		1	BovineHD0100020767	2	1	REC	0/11	25/243	0.6066
1	BovineHD0100020781	72027628	2	0.2273	0.2537	1	1	0.8651		1	BovineHD0100020781	2	1	DOM	4/7	120/148	0.7597		1	BovineHD0100020781	2	1	REC	1/10	16/252	0.5057
1	ARS-BFGL-NGS-45476	72032606	1	0.1818	0.214	2	1	0.8161		1	ARS-BFGL-NGS-45476	1	2	DOM	4/7	106/165	1		1	ARS-BFGL-NGS-45476	1	2	REC	0/11	10/261	1
1	BovineHD0100020803	72074777	2	0.3182	0.3672	1	0.8219	0.8044		1	BovineHD0100020803	2	1	DOM	6/5	169/102	0.7529		1	BovineHD0100020803	2	1	REC	1/10	30/241	1
1	ARS-BFGL-NGS-117741	72081243	1	0.5	0.452	2	0.669	1.212		1	ARS-BFGL-NGS-117741	1	2	DOM	8/3	188/83	1		1	ARS-BFGL-NGS-117741	1	2	REC	3/8	57/214	0.7061
1	Hapmap42521-BTA-35582	72127960	2	0.2273	0.214	1	0.7963	1.08		1	Hapmap42521-BTA-35582	2	1	DOM	4/7	109/162	1		1	Hapmap42521-BTA-35582	2	1	REC	1/10	7/264	0.2756
1	Hapmap43559-BTA-35576	72193451	1	0.3182	0.3229	2	1	0.9787		1	Hapmap43559-BTA-35576	1	2	DOM	5/6	144/127	0.7608		1	Hapmap43559-BTA-35576	1	2	REC	2/9	31/240	0.6238
1	ARS-BFGL-NGS-72532	72236014	1	0.4545	0.2944	2	0.1519	1.997		1	ARS-BFGL-NGS-72532	1	2	DOM	7/4	139/131	0.5442		1	ARS-BFGL-NGS-72532	1	2	REC	3/8	20/250	0.05134
1	ARS-BFGL-NGS-118725	72355134	2	0.2273	0.3801	1	0.1803	0.4797		1	ARS-BFGL-NGS-118725	2	1	DOM	3/8	178/93	0.0195		1	ARS-BFGL-NGS-118725	2	1	REC	2/9	28/243	0.3303
1	BovineHD0100020917	72419988	2	0.2273	0.1796	1	0.5729	1.343		1	BovineHD0100020917	2	1	DOM	5/6	90/180	0.5169		1	BovineHD0100020917	2	1	REC	0/11	7/263	1
1	BovineHD0100020931	72437297	1	0.4545	0.3432	2	0.3607	1.595		1	BovineHD0100020931	1	2	DOM	7/4	157/114	0.7663		1	BovineHD0100020931	1	2	REC	3/8	29/242	0.1165
1	ARS-BFGL-NGS-112042	72470845	1	0.5909	0.4742	2	0.3844	1.602		1	ARS-BFGL-NGS-112042	1	2	DOM	8/3	192/79	1		1	ARS-BFGL-NGS-112042	1	2	REC	5/6	65/206	0.148
1	ARS-BFGL-NGS-100698	72499306	2	0.3182	0.4225	1	0.3839	0.6378		1	ARS-BFGL-NGS-100698	2	1	DOM	6/5	183/88	0.5136		1	ARS-BFGL-NGS-100698	2	1	REC	1/10	46/225	0.6976
1	ARS-BFGL-NGS-59448	72533863	2	0.3182	0.3524	1	0.8232	0.8576		1	ARS-BFGL-NGS-59448	2	1	DOM	6/5	157/114	1		1	ARS-BFGL-NGS-59448	2	1	REC	1/10	34/237	1
1	BovineHD0100021005	72558796	2	0.3182	0.3727	1	0.6599	0.7856		1	BovineHD0100021005	2	1	DOM	6/5	165/102	0.754		1	BovineHD0100021005	2	1	REC	1/10	34/233	1
1	BovineHD0100021012	72576429	2	0.2727	0.3745	1	0.3768	0.6262		1	BovineHD0100021012	2	1	DOM	5/6	167/100	0.3431		1	BovineHD0100021012	2	1	REC	1/10	33/234	1
1	BovineHD0100021013	72577120	1	0.3182	0.3727	2	0.6599	0.7856		1	BovineHD0100021013	1	2	DOM	6/5	165/102	0.754		1	BovineHD0100021013	1	2	REC	1/10	34/233	1
1	BovineHD0100021016	72580910	2	0.3182	0.3727	1	0.6599	0.7856		1	BovineHD0100021016	2	1	DOM	6/5	165/102	0.754		1	BovineHD0100021016	2	1	REC	1/10	34/233	1
1	BovineHD0100021018	72592573	2	0.3182	0.3727	1	0.6599	0.7855		1	BovineHD0100021018	2	1	DOM	6/5	167/104	0.7545		1	BovineHD0100021018	2	1	REC	1/10	35/236	1
1	Hapmap41511-BTA-34652	72631840	2	0.4545	0.4594	1	1	0.9806		1	Hapmap41511-BTA-34652	2	1	DOM	8/3	190/81	1		1	Hapmap41511-BTA-34652	2	1	REC	2/9	59/212	1
1	BovineHD0100021036	72684320	2	0.2727	0.3339	1	0.6488	0.7479		1	BovineHD0100021036	2	1	DOM	5/6	153/118	0.5435		1	BovineHD0100021036	2	1	REC	1/10	28/243	1
1	BovineHD0100021037	72688416	2	0.1818	0.3195	1	0.2413	0.4732		1	BovineHD0100021037	2	1	DOM	3/8	142/124	0.1241		1	BovineHD0100021037	2	1	REC	1/10	28/238	1
1	BovineHD4100000422	72695403	2	0.3636	0.2228	1	0.1263	1.993		1	BovineHD4100000422	2	1	DOM	7/4	103/164	0.1195		1	BovineHD4100000422	2	1	REC	1/10	16/251	0.507
1	BovineHD0100021041	72703269	2	0.2727	0.3321	1	0.6494	0.7542		1	BovineHD0100021041	2	1	DOM	5/6	152/119	0.5458		1	BovineHD0100021041	2	1	REC	1/10	28/243	1
1	BovineHD4100000423	72720904	2	0.3636	0.3989	1	0.8266	0.8612		1	BovineHD4100000423	2	1	DOM	7/4	170/97	1		1	BovineHD4100000423	2	1	REC	1/10	43/224	1
1	Hapmap40716-BTA-34647	72797154	1	0.1818	0.131	2	0.5172	1.474		1	Hapmap40716-BTA-34647	1	2	DOM	4/7	69/202	0.4832		1	Hapmap40716-BTA-34647	1	2	REC	0/11	2/269	1
1	BovineHD0100021081	72860587	1	0.1818	0.1204	2	0.3321	1.624		1	BovineHD0100021081	1	2	DOM	4/7	64/206	0.4705		1	BovineHD0100021081	1	2	REC	0/11	1/269	1
1	Hapmap35151-BES4_Contig435_1199	72880876	2	0.4545	0.4483	1	1	1.025		1	Hapmap35151-BES4_Contig435_1199	2	1	DOM	8/3	187/84	1		1	Hapmap35151-BES4_Contig435_1199	2	1	REC	2/9	56/215	1
1	BTA-34645-no-rs	72960557	1	0.2273	0.131	2	0.2005	1.951		1	BTA-34645-no-rs	1	2	DOM	5/6	69/202	0.1639		1	BTA-34645-no-rs	1	2	REC	0/11	2/269	1
1	AX-18277826	73069219	1	0.3636	0.2066	2	0.1061	2.194		1	AX-18277826	1	2	DOM	7/4	102/169	0.1136		1	AX-18277826	1	2	REC	1/10	10/261	0.3597
1	BovineHD0100021145	73140826	2	0.5455	0.4926	1	0.6687	1.236		1	BovineHD0100021145	2	1	DOM	10/1	206/65	0.4672		1	BovineHD0100021145	2	1	REC	2/9	61/210	1
1	ARS-BFGL-NGS-93288	73178671	2	0.04545	0.01476	1	0.3028	3.179		1	ARS-BFGL-NGS-93288	2	1	DOM	1/10	8/263	0.3047		1	ARS-BFGL-NGS-93288	2	1	REC	0/11	0/271	1
1	ARS-BFGL-NGS-25392	73207902	2	0	0.08303	1	0.2441	0		1	ARS-BFGL-NGS-25392	2	1	DOM	0/11	44/227	0.2235		1	ARS-BFGL-NGS-25392	2	1	REC	0/11	1/270	1
1	Hapmap42919-BTA-35600	73274077	1	0.3182	0.4723	2	0.1926	0.5214		1	Hapmap42919-BTA-35600	1	2	DOM	7/4	199/72	0.4945		1	Hapmap42919-BTA-35600	1	2	REC	0/11	57/214	0.1283
1	BovineHD0100021200	73321242	2	0.3182	0.4594	1	0.2746	0.5491		1	BovineHD0100021200	2	1	DOM	7/4	194/77	0.5183		1	BovineHD0100021200	2	1	REC	0/11	55/216	0.13
1	ARS-BFGL-NGS-53144	73435277	2	0.2273	0.1716	1	0.5632	1.42		1	ARS-BFGL-NGS-53144	2	1	DOM	5/6	86/185	0.341		1	ARS-BFGL-NGS-53144	2	1	REC	0/11	7/264	1
1	ARS-BFGL-NGS-23062	73463897	1	0.4091	0.4871	2	0.52	0.729		1	ARS-BFGL-NGS-23062	1	2	DOM	8/3	204/67	1		1	ARS-BFGL-NGS-23062	1	2	REC	1/10	60/211	0.4661
1	BovineHD0100021254	73530556	1	0.2273	0.1747	2	0.5666	1.389		1	BovineHD0100021254	1	2	DOM	5/6	82/187	0.3256		1	BovineHD0100021254	1	2	REC	0/11	12/257	1
1	ARS-BFGL-NGS-32169	73586758	2	0.2273	0.2177	1	1	1.057		1	ARS-BFGL-NGS-32169	2	1	DOM	5/6	102/169	0.7529		1	ARS-BFGL-NGS-32169	2	1	REC	0/11	16/255	1
1	BovineHD0100021274	73600387	2	0.5455	0.4758	1	0.6642	1.322		1	BovineHD0100021274	2	1	DOM	9/2	187/82	0.5143		1	BovineHD0100021274	2	1	REC	3/8	69/200	1
1	ARS-BFGL-BAC-36572	73608012	1	0.2273	0.2841	2	0.638	0.741		1	ARS-BFGL-BAC-36572	1	2	DOM	4/7	127/144	0.5524		1	ARS-BFGL-BAC-36572	1	2	REC	1/10	27/244	1
1	BovineHD0100021284	73652242	1	0.4545	0.4963	2	0.8286	0.8458		1	BovineHD0100021284	1	2	DOM	7/4	197/73	0.5		1	BovineHD0100021284	1	2	REC	3/8	71/199	1
1	BTA-35628-no-rs	73671409	1	0.1364	0.1974	2	0.5934	0.6419		1	BTA-35628-no-rs	1	2	DOM	3/8	94/177	0.7535		1	BTA-35628-no-rs	1	2	REC	0/11	13/258	1
1	UA-IFASA-4774	73714346	2	0.4091	0.3081	1	0.3499	1.555		1	UA-IFASA-4774	2	1	DOM	7/4	136/135	0.5411		1	UA-IFASA-4774	2	1	REC	2/9	31/240	0.6238
1	ARS-BFGL-NGS-114627	73744599	1	0.2727	0.3579	2	0.5	0.6727		1	ARS-BFGL-NGS-114627	1	2	DOM	6/5	161/110	0.7628		1	ARS-BFGL-NGS-114627	1	2	REC	0/11	33/238	0.373
1	BovineHD0100021316	73749733	1	0.5909	0.4576	2	0.2764	1.712		1	BovineHD0100021316	1	2	DOM	9/2	186/85	0.5121		1	BovineHD0100021316	1	2	REC	4/7	62/209	0.2907
1	BovineHD0100021318	73754036	2	0.5	0.3309	1	0.1107	2.022		1	BovineHD0100021318	2	1	DOM	8/3	146/123	0.3551		1	BovineHD0100021318	2	1	REC	3/8	32/237	0.146
1	BovineHD0100021321	73767633	1	0.5909	0.4519	2	0.2748	1.752		1	BovineHD0100021321	1	2	DOM	9/2	184/86	0.5115		1	BovineHD0100021321	1	2	REC	4/7	60/210	0.279
1	BTA-35631-no-rs	73789857	2	0.09091	0.1218	1	1	0.7212		1	BTA-35631-no-rs	2	1	DOM	2/9	62/209	1		1	BTA-35631-no-rs	2	1	REC	0/11	4/267	1
1	BovineHD0100021334	73816649	2	0.09091	0.1222	1	1	0.7182		1	BovineHD0100021334	2	1	DOM	2/9	62/208	1		1	BovineHD0100021334	2	1	REC	0/11	4/266	1
1	BovineHD0100021364	73945134	2	0.3182	0.3155	1	1	1.012		1	BovineHD0100021364	2	1	DOM	6/5	145/126	1		1	BovineHD0100021364	2	1	REC	1/10	26/245	1
1	Hapmap38109-BTA-36588	73971461	2	0.09091	0.1181	1	1	0.7469		1	Hapmap38109-BTA-36588	2	1	DOM	2/9	60/211	1		1	Hapmap38109-BTA-36588	2	1	REC	0/11	4/267	1
1	BovineHD0100021422	74027229	2	0.09091	0.06458	1	0.649	1.449		1	BovineHD0100021422	2	1	DOM	2/9	33/238	0.6325		1	BovineHD0100021422	2	1	REC	0/11	2/269	1
1	BovineHD0100021430	74062960	1	0.1818	0.25	2	0.6171	0.6667		1	BovineHD0100021430	1	2	DOM	3/8	115/155	0.3676		1	BovineHD0100021430	1	2	REC	1/10	20/250	0.5813
1	BovineHD0100021450	74103245	1	0.04545	0.1439	2	0.3423	0.2833		1	BovineHD0100021450	1	2	DOM	1/10	70/201	0.301		1	BovineHD0100021450	1	2	REC	0/11	8/263	1
1	BTA-36593-no-rs	74141004	1	0	0.03506	2	1	0		1	BTA-36593-no-rs	1	2	DOM	0/11	18/253	1		1	BTA-36593-no-rs	1	2	REC	0/11	1/270	1
1	ARS-BFGL-NGS-81861	74559106	2	0.3636	0.3111	1	0.6412	1.265		1	ARS-BFGL-NGS-81861	2	1	DOM	7/4	146/124	0.7592		1	ARS-BFGL-NGS-81861	2	1	REC	1/10	22/248	1
1	BovineHD0100021626	74644792	2	0.4091	0.4705	1	0.6654	0.7792		1	BovineHD0100021626	2	1	DOM	7/4	202/69	0.4832		1	BovineHD0100021626	2	1	REC	2/9	53/218	1
1	Hapmap51396-BTA-114937	74646138	1	0.04545	0.1421	2	0.341	0.2876		1	Hapmap51396-BTA-114937	1	2	DOM	1/10	73/198	0.2984		1	Hapmap51396-BTA-114937	1	2	REC	0/11	4/267	1
1	ARS-BFGL-NGS-37067	74688985	2	0.2727	0.3875	1	0.3721	0.5929		1	ARS-BFGL-NGS-37067	2	1	DOM	6/5	165/106	0.7567		1	ARS-BFGL-NGS-37067	2	1	REC	0/11	45/226	0.2221
1	Hapmap60658-rs29025870	74716669	2	0.04545	0.0203	1	0.3826	2.299		1	Hapmap60658-rs29025870	2	1	DOM	1/10	11/260	0.3857		1	Hapmap60658-rs29025870	2	1	REC	0/11	0/271	1
1	BovineHD0100021666	74729378	2	0.1364	0.1444	1	1	0.9352		1	BovineHD0100021666	2	1	DOM	3/8	72/198	1		1	BovineHD0100021666	2	1	REC	0/11	6/264	1
1	Hapmap51567-BTA-17154	74751617	1	0	0.02768	2	1	0		1	Hapmap51567-BTA-17154	1	2	DOM	0/11	15/256	1		1	Hapmap51567-BTA-17154	1	2	REC	0/11	0/271	1
1	BovineHD0100021709	74861369	2	0.1818	0.221	1	0.7973	0.7834		1	BovineHD0100021709	2	1	DOM	4/7	107/160	1		1	BovineHD0100021709	2	1	REC	0/11	11/256	1
1	Hapmap25308-BTA-153014	74893925	1	0.2727	0.2989	2	1	0.8796		1	Hapmap25308-BTA-153014	1	2	DOM	6/5	136/135	1		1	Hapmap25308-BTA-153014	1	2	REC	0/11	26/245	0.6069
1	BovineHD0100021731	74943999	1	0.4091	0.3815	2	0.825	1.122		1	BovineHD0100021731	1	2	DOM	6/5	177/93	0.5233		1	BovineHD0100021731	1	2	REC	3/8	29/241	0.1175
1	ARS-BFGL-NGS-116528	74955005	1	0.04545	0.1338	2	0.3388	0.3082		1	ARS-BFGL-NGS-116528	1	2	DOM	1/10	67/202	0.3058		1	ARS-BFGL-NGS-116528	1	2	REC	0/11	5/264	1
1	ARS-BFGL-NGS-34525	74976635	2	0.3182	0.3266	1	1	0.9623		1	ARS-BFGL-NGS-34525	2	1	DOM	6/5	150/121	1		1	ARS-BFGL-NGS-34525	2	1	REC	1/10	27/244	1
1	BovineHD0100021752	75000671	1	0.5	0.4594	2	0.8281	1.177		1	BovineHD0100021752	1	2	DOM	8/3	198/73	1		1	BovineHD0100021752	1	2	REC	3/8	51/220	0.4458
1	ARS-BFGL-NGS-15456	75006721	1	0.3182	0.3266	2	1	0.9623		1	ARS-BFGL-NGS-15456	1	2	DOM	6/5	150/121	1		1	ARS-BFGL-NGS-15456	1	2	REC	1/10	27/244	1
1	BovineHD0100021760	75020131	1	0.4091	0.3155	2	0.3582	1.502		1	BovineHD0100021760	1	2	DOM	7/4	146/125	0.7592		1	BovineHD0100021760	1	2	REC	2/9	25/246	0.2841
1	BovineHD0100021766	75040457	1	0.1818	0.1828	2	1	0.9932		1	BovineHD0100021766	1	2	DOM	4/7	87/181	0.7529		1	BovineHD0100021766	1	2	REC	0/11	11/257	1
1	BovineHD0100021769	75049173	1	0.5	0.4648	2	0.8288	1.151		1	BovineHD0100021769	1	2	DOM	7/4	197/73	0.5		1	BovineHD0100021769	1	2	REC	4/7	54/216	0.2463
1	BovineHD0100021799	75160480	2	0.2727	0.3395	1	0.6477	0.7296		1	BovineHD0100021799	2	1	DOM	5/6	148/123	0.557		1	BovineHD0100021799	2	1	REC	1/10	36/235	1
1	Hapmap39961-BTA-100527	75184170	2	0.4091	0.441	1	0.8295	0.8777		1	Hapmap39961-BTA-100527	2	1	DOM	7/4	186/85	0.7462		1	Hapmap39961-BTA-100527	2	1	REC	2/9	53/218	1
1	BovineHD0100021814	75240418	1	0.4091	0.3524	2	0.651	1.272		1	BovineHD0100021814	1	2	DOM	7/4	156/115	0.765		1	BovineHD0100021814	1	2	REC	2/9	35/236	0.6423
1	Hapmap59172-rs29012834	75269086	2	0.2273	0.179	1	0.572	1.349		1	Hapmap59172-rs29012834	2	1	DOM	4/7	86/185	0.7483		1	Hapmap59172-rs29012834	2	1	REC	1/10	11/260	0.3857
1	BovineHD0100021825	75294719	2	0.4545	0.5	1	0.8285	0.8333		1	BovineHD0100021825	2	1	DOM	9/2	202/69	0.736		1	BovineHD0100021825	2	1	REC	1/10	69/202	0.3026
1	ARS-BFGL-NGS-72713	75346472	1	0.1818	0.2546	2	0.6172	0.6506		1	ARS-BFGL-NGS-72713	1	2	DOM	4/7	121/150	0.7599		1	ARS-BFGL-NGS-72713	1	2	REC	0/11	17/254	1
1	BovineHD0100021876	75479315	1	0.3182	0.2741	2	0.6319	1.236		1	BovineHD0100021876	1	2	DOM	6/5	130/140	0.7639		1	BovineHD0100021876	1	2	REC	1/10	18/252	0.5437
1	BovineHD0100021879	75486197	2	0.3636	0.3755	1	1	0.9505		1	BovineHD0100021879	2	1	DOM	7/4	161/108	1		1	BovineHD0100021879	2	1	REC	1/10	41/228	1
1	BovineHD0100021922	75570333	1	0.5455	0.4963	2	0.6706	1.218		1	BovineHD0100021922	1	2	DOM	9/2	205/66	1		1	BovineHD0100021922	1	2	REC	3/8	64/207	0.7263
1	BovineHD0100021932	75602779	2	0	0.03321	1	1	0		1	BovineHD0100021932	2	1	DOM	0/11	18/253	1		1	BovineHD0100021932	2	1	REC	0/11	0/271	1
1	ARS-BFGL-NGS-64672	75635752	2	0.3182	0.3819	1	0.6569	0.7552		1	ARS-BFGL-NGS-64672	2	1	DOM	5/6	172/99	0.3397		1	ARS-BFGL-NGS-64672	2	1	REC	2/9	35/236	0.6423
1	Hapmap42898-BTA-28764	75682742	2	0	0.01845	1	1	0		1	Hapmap42898-BTA-28764	2	1	DOM	0/11	10/261	1		1	Hapmap42898-BTA-28764	2	1	REC	0/11	0/271	1
1	BTA-28763-no-rs	75716538	1	0.2727	0.2712	2	1	1.008		1	BTA-28763-no-rs	1	2	DOM	5/6	127/144	1		1	BTA-28763-no-rs	1	2	REC	1/10	20/251	0.5799
1	BovineHD0100021976	75755758	2	0.5455	0.4389	1	0.3835	1.534		1	BovineHD0100021976	2	1	DOM	8/3	181/89	1		1	BovineHD0100021976	2	1	REC	4/7	56/214	0.2559
1	ARS-BFGL-BAC-31487	75852855	1	0.3182	0.2694	2	0.6274	1.266		1	ARS-BFGL-BAC-31487	1	2	DOM	5/6	122/149	1		1	ARS-BFGL-BAC-31487	1	2	REC	2/9	24/247	0.2688
1	BovineHD0100022054	75904016	1	0.4091	0.4907	2	0.518	0.7184		1	BovineHD0100022054	1	2	DOM	8/3	197/73	1		1	BovineHD0100022054	1	2	REC	1/10	68/202	0.3041
1	BovineHD0100022062	75933471	2	0.3182	0.2463	1	0.4539	1.428		1	BovineHD0100022062	2	1	DOM	5/6	116/154	1		1	BovineHD0100022062	2	1	REC	2/9	17/253	0.1653
1	BovineHD0100022071	75978132	1	0.1818	0.1255	2	0.5083	1.549		1	BovineHD0100022071	1	2	DOM	4/7	66/205	0.4744		1	BovineHD0100022071	1	2	REC	0/11	2/269	1
1	BovineHD0100022072	75982657	1	0.5	0.4	2	0.3802	1.5		1	BovineHD0100022072	1	2	DOM	9/2	174/96	0.3393		1	BovineHD0100022072	1	2	REC	2/9	42/228	0.6845
1	Hapmap44063-BTA-36599	76003958	1	0.1818	0.1162	2	0.3172	1.69		1	Hapmap44063-BTA-36599	1	2	DOM	4/7	62/209	0.2907		1	Hapmap44063-BTA-36599	1	2	REC	0/11	1/270	1
1	BovineHD0100022079	76022080	2	0.5	0.3996	1	0.3799	1.502		1	BovineHD0100022079	2	1	DOM	9/2	173/96	0.3389		1	BovineHD0100022079	2	1	REC	2/9	42/227	0.6855
1	BTA-95639-no-rs	76090160	1	0	0.02583	2	1	0		1	BTA-95639-no-rs	1	2	DOM	0/11	14/257	1		1	BTA-95639-no-rs	1	2	REC	0/11	0/271	1
1	BTA-95638-no-rs	76119473	2	0	0.02583	1	1	0		1	BTA-95638-no-rs	2	1	DOM	0/11	14/257	1		1	BTA-95638-no-rs	2	1	REC	0/11	0/271	1
1	ARS-BFGL-BAC-31482	76172887	1	0.4545	0.4945	2	0.8288	0.852		1	ARS-BFGL-BAC-31482	1	2	DOM	7/4	207/64	0.3048		1	ARS-BFGL-BAC-31482	1	2	REC	3/8	61/210	0.7166
1	BovineHD0100022149	76207235	2	0.09091	0.1574	1	0.5544	0.5353		1	BovineHD0100022149	2	1	DOM	2/9	79/191	0.7347		1	BovineHD0100022149	2	1	REC	0/11	6/264	1
1	BTA-95655-no-rs	76217113	1	0.2727	0.2601	2	1	1.066		1	BTA-95655-no-rs	1	2	DOM	5/6	121/150	1		1	BTA-95655-no-rs	1	2	REC	1/10	20/251	0.5799
1	BovineHD4100000445	76232991	1	0.2727	0.4059	2	0.2693	0.5489		1	BovineHD4100000445	1	2	DOM	4/7	182/89	0.04938		1	BovineHD4100000445	1	2	REC	2/9	38/233	0.659
1	BTA-18708-no-rs	76257377	2	0.2273	0.1292	1	0.1957	1.983		1	BTA-18708-no-rs	2	1	DOM	5/6	68/203	0.1595		1	BTA-18708-no-rs	2	1	REC	0/11	2/269	1
1	Hapmap50334-BTA-36619	76318682	2	0	0.03875	1	1	0		1	Hapmap50334-BTA-36619	2	1	DOM	0/11	21/250	1		1	Hapmap50334-BTA-36619	2	1	REC	0/11	0/271	1
1	BovineHD0100022176	76321233	1	0.4091	0.3277	2	0.4891	1.42		1	BovineHD0100022176	1	2	DOM	7/4	145/122	0.7591		1	BovineHD0100022176	1	2	REC	2/9	30/237	0.3679
1	BovineHD0100022177	76324446	1	0.6364	0.4551	2	0.1259	2.096		1	BovineHD0100022177	1	2	DOM	9/2	193/74	0.7327		1	BovineHD0100022177	1	2	REC	5/6	50/217	0.04488
1	ARS-BFGL-NGS-34347	76375060	2	0.2273	0.2528	1	1	0.8695		1	ARS-BFGL-NGS-34347	2	1	DOM	4/7	119/152	0.761		1	ARS-BFGL-NGS-34347	2	1	REC	1/10	18/253	0.5424
1	BovineHD0100022236	76555608	2	0.1818	0.1697	1	0.7779	1.087		1	BovineHD0100022236	2	1	DOM	4/7	84/187	0.7442		1	BovineHD0100022236	2	1	REC	0/11	8/263	1
1	BovineHD4100000446	76564040	1	0.1364	0.06458	2	0.179	2.287		1	BovineHD4100000446	1	2	DOM	2/9	35/236	0.6423		1	BovineHD4100000446	1	2	REC	1/10	0/271	0.03901
1	Hapmap44231-BTA-36623	76587512	1	0.4545	0.4686	2	1	0.9449		1	Hapmap44231-BTA-36623	1	2	DOM	8/3	200/71	1		1	Hapmap44231-BTA-36623	1	2	REC	2/9	54/217	1
1	BovineHD0100022255	76616096	1	0.09091	0.1498	2	0.7573	0.5675		1	BovineHD0100022255	1	2	DOM	2/9	72/195	0.733		1	BovineHD0100022255	1	2	REC	0/11	8/259	1
1	BTA-36624-no-rs	76627997	1	0.2727	0.2546	2	0.8065	1.098		1	BTA-36624-no-rs	1	2	DOM	5/6	120/151	1		1	BTA-36624-no-rs	1	2	REC	1/10	18/253	0.5424
1	BovineHD0100022258	76630687	1	0.09091	0.1827	2	0.3973	0.4475		1	BovineHD0100022258	1	2	DOM	2/9	87/184	0.5115		1	BovineHD0100022258	1	2	REC	0/11	12/259	1
1	Hapmap34720-BES7_Contig462_688	76662005	2	0.2273	0.1236	1	0.1828	2.085		1	Hapmap34720-BES7_Contig462_688	2	1	DOM	4/7	63/208	0.2976		1	Hapmap34720-BES7_Contig462_688	2	1	REC	1/10	4/267	0.1816
1	ARS-BFGL-NGS-4661	76701704	1	0.1818	0.08856	2	0.1352	2.287		1	ARS-BFGL-NGS-4661	1	2	DOM	4/7	41/230	0.07984		1	ARS-BFGL-NGS-4661	1	2	REC	0/11	7/264	1
1	BovineHD0100022298	76781403	2	0.4091	0.3993	1	1	1.042		1	BovineHD0100022298	2	1	DOM	8/3	178/90	0.7567		1	BovineHD0100022298	2	1	REC	1/10	36/232	1
1	ARS-BFGL-NGS-92711	76822042	1	0.04545	0.05741	2	1	0.7819		1	ARS-BFGL-NGS-92711	1	2	DOM	1/10	31/239	1		1	ARS-BFGL-NGS-92711	1	2	REC	0/11	0/270	1
1	BovineHD0100022312	76841239	1	0.1818	0.1381	2	0.5312	1.387		1	BovineHD0100022312	1	2	DOM	3/8	70/198	1		1	BovineHD0100022312	1	2	REC	1/10	4/264	0.1834
1	Hapmap42923-BTA-36604	76862840	1	0.2273	0.2768	2	0.8082	0.7686		1	Hapmap42923-BTA-36604	1	2	DOM	4/7	128/143	0.5502		1	Hapmap42923-BTA-36604	1	2	REC	1/10	22/249	1
1	ARS-BFGL-BAC-34664	76937066	1	0.4091	0.4576	2	0.8278	0.8207		1	ARS-BFGL-BAC-34664	1	2	DOM	6/5	193/78	0.3097		1	ARS-BFGL-BAC-34664	1	2	REC	3/8	55/216	0.702
1	ARS-BFGL-NGS-80187	76984280	2	0.04545	0.01476	1	0.3028	3.179		1	ARS-BFGL-NGS-80187	2	1	DOM	1/10	8/263	0.3047		1	ARS-BFGL-NGS-80187	2	1	REC	0/11	0/271	1
1	BTA-36608-no-rs	77024680	1	0.4091	0.4262	2	1	0.9321		1	BTA-36608-no-rs	1	2	DOM	7/4	184/87	0.7506		1	BTA-36608-no-rs	1	2	REC	2/9	47/224	1
1	BovineHD0100022375	77039767	2	0.2273	0.21	1	0.793	1.106		1	BovineHD0100022375	2	1	DOM	5/6	103/166	0.7543		1	BovineHD0100022375	2	1	REC	0/11	10/259	1
1	BovineHD0100022381	77073696	1	0.3182	0.3563	2	0.8225	0.8429		1	BovineHD0100022381	1	2	DOM	5/6	158/110	0.5343		1	BovineHD0100022381	1	2	REC	2/9	33/235	0.6342
1	BovineHD0100022391	77191739	2	0.2273	0.3081	1	0.4879	0.6604		1	BovineHD0100022391	2	1	DOM	4/7	146/125	0.3575		1	BovineHD0100022391	2	1	REC	1/10	21/250	0.5976
1	BovineHD0100022400	77211300	1	0.2273	0.3093	2	0.4872	0.6569		1	BovineHD0100022400	1	2	DOM	4/7	146/124	0.3569		1	BovineHD0100022400	1	2	REC	1/10	21/249	0.599
1	Hapmap41244-BTA-36610	77266687	1	0	0.07196	2	0.3894	0		1	Hapmap41244-BTA-36610	1	2	DOM	0/11	37/234	0.3695		1	Hapmap41244-BTA-36610	1	2	REC	0/11	2/269	1
1	BovineHD0100022431	77305700	1	0.1818	0.3247	2	0.242	0.4621		1	BovineHD0100022431	1	2	DOM	4/7	146/125	0.3575		1	BovineHD0100022431	1	2	REC	0/11	30/241	0.6136
1	BovineHD0100022450	77354625	2	0.3636	0.3067	1	0.6387	1.292		1	BovineHD0100022450	2	1	DOM	6/5	140/129	1		1	BovineHD0100022450	2	1	REC	2/9	25/244	0.2871
1	BovineHD0100022456	77372630	2	0.3182	0.3727	1	0.6599	0.7855		1	BovineHD0100022456	2	1	DOM	6/5	170/101	0.7522		1	BovineHD0100022456	2	1	REC	1/10	32/239	1
1	BovineHD0100022459	77383623	1	0.2273	0.3048	2	0.6358	0.6707		1	BovineHD0100022459	1	2	DOM	5/6	133/136	1		1	BovineHD0100022459	1	2	REC	0/11	31/238	0.6173
1	Hapmap58919-rs29009958	77411154	2	0.5	0.452	1	0.669	1.212		1	Hapmap58919-rs29009958	2	1	DOM	8/3	183/88	1		1	Hapmap58919-rs29009958	2	1	REC	3/8	62/209	0.7197
1	BovineHD0100022472	77437362	1	0.4091	0.4889	2	0.519	0.7237		1	BovineHD0100022472	1	2	DOM	7/4	195/76	0.5131		1	BovineHD0100022472	1	2	REC	2/9	70/201	0.7349
1	ARS-BFGL-NGS-56146	77464630	1	0.4091	0.4336	2	1	0.9044		1	ARS-BFGL-NGS-56146	1	2	DOM	7/4	179/92	1		1	ARS-BFGL-NGS-56146	1	2	REC	2/9	56/215	1
1	BovineHD0100022485	77478069	2	0.09091	0.0539	1	0.3472	1.755		1	BovineHD0100022485	2	1	DOM	1/10	28/241	1		1	BovineHD0100022485	2	1	REC	1/10	1/268	0.07716
1	BovineHD0100022505	77511314	2	0.2273	0.2934	1	0.6352	0.7085		1	BovineHD0100022505	2	1	DOM	4/7	139/132	0.3723		1	BovineHD0100022505	2	1	REC	1/10	20/251	0.5799
1	BovineHD0100022553	77723763	1	0.3636	0.4244	2	0.663	0.7752		1	BovineHD0100022553	1	2	DOM	7/4	176/95	1		1	BovineHD0100022553	1	2	REC	1/10	54/217	0.6976
1	BovineHD0100022574	77819373	2	0.1818	0.2593	1	0.6182	0.6349		1	BovineHD0100022574	2	1	DOM	4/7	119/151	0.7607		1	BovineHD0100022574	2	1	REC	0/11	21/249	1
1	Hapmap39375-BTA-112108	77861430	2	0.2727	0.214	1	0.5961	1.377		1	Hapmap39375-BTA-112108	2	1	DOM	5/6	106/165	0.7567		1	Hapmap39375-BTA-112108	2	1	REC	1/10	10/261	0.3597
1	BovineHD0100022618	77981891	1	0.4545	0.4907	2	0.8293	0.8648		1	BovineHD0100022618	1	2	DOM	7/4	194/76	0.5146		1	BovineHD0100022618	1	2	REC	3/8	71/199	1
1	BovineHD0100022630	78030606	1	0.2727	0.3232	2	0.8162	0.7853		1	BovineHD0100022630	1	2	DOM	6/5	138/125	1		1	BovineHD0100022630	1	2	REC	0/11	32/231	0.3728
1	BovineHD0100022631	78033295	1	0.5	0.4631	2	0.8285	1.159		1	BovineHD0100022631	1	2	DOM	7/4	187/84	0.7442		1	BovineHD0100022631	1	2	REC	4/7	64/207	0.3048
1	BovineHD0100022654	78115174	2	0.1364	0.1537	1	1	0.8694		1	BovineHD0100022654	2	1	DOM	3/8	75/195	1		1	BovineHD0100022654	2	1	REC	0/11	8/262	1
1	BovineHD0100022661	78135652	2	0.1364	0.2472	1	0.3141	0.4808		1	BovineHD0100022661	2	1	DOM	3/8	115/154	0.3665		1	BovineHD0100022661	2	1	REC	0/11	18/251	1
1	Hapmap26500-BTA-37512	78174116	2	0.04545	0.06827	1	1	0.6499		1	Hapmap26500-BTA-37512	2	1	DOM	1/10	36/235	1		1	Hapmap26500-BTA-37512	2	1	REC	0/11	1/270	1
1	ARS-BFGL-BAC-31500	78202852	1	0.3636	0.4244	2	0.663	0.7752		1	ARS-BFGL-BAC-31500	1	2	DOM	7/4	173/98	1		1	ARS-BFGL-BAC-31500	1	2	REC	1/10	57/214	0.4702
1	BTA-37493-no-rs	78237770	2	0.1364	0.06089	1	0.1593	2.435		1	BTA-37493-no-rs	2	1	DOM	2/9	30/241	0.3609		1	BTA-37493-no-rs	2	1	REC	1/10	3/268	0.1479
1	BovineHD0100022701	78279880	2	0.04545	0.158	1	0.2272	0.2538		1	BovineHD0100022701	2	1	DOM	1/10	78/191	0.1897		1	BovineHD0100022701	2	1	REC	0/11	7/262	1
1	BovineHD0100022703	78290520	1	0.3182	0.4185	2	0.3863	0.6484		1	BovineHD0100022703	1	2	DOM	6/5	172/98	0.5387		1	BovineHD0100022703	1	2	REC	1/10	54/216	0.6978
1	BTB-00034886	78315800	2	0.04545	0.1771	1	0.1492	0.2212		1	BTB-00034886	2	1	DOM	1/10	89/182	0.1829		1	BTB-00034886	2	1	REC	0/11	7/264	1
1	BovineHD0100022711	78328342	1	0.3182	0.4123	2	0.5079	0.6652		1	BovineHD0100022711	1	2	DOM	6/5	169/99	0.5453		1	BovineHD0100022711	1	2	REC	1/10	52/216	0.6962
1	ARS-BFGL-NGS-119431	78397732	1	0.4545	0.4705	2	1	0.9379		1	ARS-BFGL-NGS-119431	1	2	DOM	7/4	192/79	0.7365		1	ARS-BFGL-NGS-119431	1	2	REC	3/8	63/208	0.7229
1	BTB-00034743	78445777	2	0.5	0.4465	1	0.6659	1.24		1	BTB-00034743	2	1	DOM	7/4	183/88	0.753		1	BTB-00034743	2	1	REC	4/7	59/212	0.2715
1	BovineHD0100022753	78498849	1	0	0.1916	2	0.02059	0		1	BovineHD0100022753	1	2	DOM	0/11	90/171	0.01811		1	BovineHD0100022753	1	2	REC	0/11	10/251	1
1	Hapmap40722-BTA-36642	78554220	2	0.2273	0.1292	1	0.1957	1.983		1	Hapmap40722-BTA-36642	2	1	DOM	4/7	64/207	0.3048		1	Hapmap40722-BTA-36642	2	1	REC	1/10	6/265	0.2454
1	BTA-112299-no-rs	78580480	2	0.3636	0.4926	1	0.28	0.5886		1	BTA-112299-no-rs	2	1	DOM	6/5	193/78	0.3097		1	BTA-112299-no-rs	2	1	REC	2/9	74/197	0.7328
1	BovineHD0100022788	78620073	2	0.09091	0.2156	1	0.1918	0.3637		1	BovineHD0100022788	2	1	DOM	1/10	101/161	0.05788		1	BovineHD0100022788	2	1	REC	1/10	12/250	0.4213
1	ARS-BFGL-NGS-111725	78685368	1	0.3636	0.2362	2	0.2019	1.848		1	ARS-BFGL-NGS-111725	1	2	DOM	6/5	116/155	0.5397		1	ARS-BFGL-NGS-111725	1	2	REC	2/9	12/259	0.09743
1	ARS-BFGL-NGS-25522	78735491	1	0.09091	0.2454	2	0.1259	0.3075		1	ARS-BFGL-NGS-25522	1	2	DOM	2/9	119/152	0.1229		1	ARS-BFGL-NGS-25522	1	2	REC	0/11	14/257	1
1	BovineHD0100022839	78771750	1	0.1364	0.1203	2	0.7404	1.155		1	BovineHD0100022839	1	2	DOM	3/8	59/207	0.714		1	BovineHD0100022839	1	2	REC	0/11	5/261	1
1	BTB-00034294	78909030	1	0.2727	0.262	2	1	1.056		1	BTB-00034294	1	2	DOM	6/5	123/148	0.557		1	BTB-00034294	1	2	REC	0/11	19/252	1
1	BovineHD0100022901	78991936	1	0.3182	0.2928	2	0.8129	1.127		1	BovineHD0100022901	1	2	DOM	6/5	131/132	1		1	BovineHD0100022901	1	2	REC	1/10	23/240	1
1	Hapmap51218-BTA-36630	79040221	1	0.4545	0.4225	2	0.8274	1.139		1	Hapmap51218-BTA-36630	1	2	DOM	7/4	184/87	0.7506		1	Hapmap51218-BTA-36630	1	2	REC	3/8	45/226	0.4061
1	BovineHD0100022920	79076444	1	0.2727	0.4275	2	0.188	0.5022		1	BovineHD0100022920	1	2	DOM	5/6	184/85	0.1847		1	BovineHD0100022920	1	2	REC	1/10	46/223	0.6972
1	BTB-00034202	79082187	2	0.1818	0.1444	1	0.5461	1.316		1	BTB-00034202	2	1	DOM	4/7	74/196	0.5046		1	BTB-00034202	2	1	REC	0/11	4/266	1
1	Hapmap49586-BTA-36632	79111744	1	0.1364	0.3376	2	0.06256	0.3097		1	Hapmap49586-BTA-36632	1	2	DOM	2/9	157/114	0.01191		1	Hapmap49586-BTA-36632	1	2	REC	1/10	26/245	1
1	ARS-BFGL-NGS-106728	79166288	1	0.3636	0.3093	2	0.6401	1.276		1	ARS-BFGL-NGS-106728	1	2	DOM	6/5	144/126	1		1	ARS-BFGL-NGS-106728	1	2	REC	2/9	23/247	0.2548
1	ARS-BFGL-NGS-24966	79190806	2	0.1818	0.1642	1	0.7717	1.131		1	ARS-BFGL-NGS-24966	2	1	DOM	4/7	83/188	0.7423		1	ARS-BFGL-NGS-24966	2	1	REC	0/11	6/265	1
1	BovineHD0100022969	79235157	2	0.5455	0.3954	1	0.1852	1.835		1	BovineHD0100022969	2	1	DOM	8/3	165/98	0.7513		1	BovineHD0100022969	2	1	REC	4/7	43/220	0.09977
1	BovineHD0100022979	79266686	2	0.2727	0.464	1	0.08457	0.4332		1	BovineHD0100022979	2	1	DOM	6/5	185/79	0.3196		1	BovineHD0100022979	2	1	REC	0/11	60/204	0.129
1	ARS-BFGL-NGS-113198	79291931	2	0.1818	0.1292	1	0.514	1.498		1	ARS-BFGL-NGS-113198	2	1	DOM	4/7	64/207	0.3048		1	ARS-BFGL-NGS-113198	2	1	REC	0/11	6/265	1
1	Hapmap51438-BTA-37566	79315052	2	0.2727	0.5037	1	0.04826	0.3695		1	Hapmap51438-BTA-37566	2	1	DOM	6/5	202/69	0.1639		1	Hapmap51438-BTA-37566	2	1	REC	0/11	71/200	0.07104
1	BovineHD0100023005	79357690	1	0.2273	0.4447	2	0.04928	0.3673		1	BovineHD0100023005	1	2	DOM	4/7	182/80	0.04088		1	BovineHD0100023005	1	2	REC	1/10	51/211	0.6962
1	BTB-00036018	79428743	1	0.4091	0.3506	2	0.6502	1.283		1	BTB-00036018	1	2	DOM	6/5	160/111	0.7646		1	BTB-00036018	1	2	REC	3/8	30/241	0.1253
1	ARS-BFGL-NGS-100951	79472403	2	0.5455	0.4686	1	0.5192	1.361		1	ARS-BFGL-NGS-100951	2	1	DOM	8/3	202/69	1		1	ARS-BFGL-NGS-100951	2	1	REC	4/7	52/219	0.2373
1	BovineHD0100023038	79495073	1	0.3182	0.1992	2	0.1804	1.876		1	BovineHD0100023038	1	2	DOM	6/5	94/167	0.2201		1	BovineHD0100023038	1	2	REC	1/10	10/251	0.3705
1	BovineHD0100023042	79510270	2	0.1364	0.1	1	0.4803	1.421		1	BovineHD0100023042	2	1	DOM	3/8	47/213	0.4314		1	BovineHD0100023042	2	1	REC	0/11	5/255	1
1	BTA-37567-no-rs	79513248	2	0.4091	0.3432	1	0.5033	1.325		1	BTA-37567-no-rs	2	1	DOM	7/4	153/118	0.7618		1	BTA-37567-no-rs	2	1	REC	2/9	33/238	0.6325
1	Hapmap41250-BTA-38429	79548115	2	0.09091	0.2741	1	0.08177	0.2649		1	Hapmap41250-BTA-38429	2	1	DOM	2/9	129/141	0.06686		1	Hapmap41250-BTA-38429	2	1	REC	0/11	19/251	1
1	BovineHD0100023059	79572795	1	0.3636	0.417	2	0.6657	0.799		1	BovineHD0100023059	1	2	DOM	6/5	176/89	0.5181		1	BovineHD0100023059	1	2	REC	2/9	45/220	1
1	BovineHD0100023067	79605572	1	0.6364	0.459	2	0.1273	2.063		1	BovineHD0100023067	1	2	DOM	9/2	196/72	0.7331		1	BovineHD0100023067	1	2	REC	5/6	50/218	0.04425
1	BovineHD0100023079	79639732	2	0.5455	0.4316	1	0.3806	1.581		1	BovineHD0100023079	2	1	DOM	9/2	183/80	0.5144		1	BovineHD0100023079	2	1	REC	3/8	44/219	0.408
1	BovineHD0100023116	79756204	2	0.4545	0.3657	1	0.4994	1.446		1	BovineHD0100023116	2	1	DOM	9/2	166/102	0.2199		1	BovineHD0100023116	2	1	REC	1/10	30/238	1
1	BTB-00036138	79757250	2	0.1818	0.19	1	1	0.9471		1	BTB-00036138	2	1	DOM	4/7	95/176	1		1	BTB-00036138	2	1	REC	0/11	8/263	1
1	Hapmap50131-BTA-85559	79835571	2	0.1818	0.1716	1	0.7801	1.073		1	Hapmap50131-BTA-85559	2	1	DOM	4/7	84/187	0.7442		1	Hapmap50131-BTA-85559	2	1	REC	0/11	9/262	1
1	BovineHD0100023133	79858270	1	0.2273	0.25	2	1	0.8824		1	BovineHD0100023133	1	2	DOM	5/6	115/149	1		1	BovineHD0100023133	1	2	REC	0/11	17/247	1
1	BovineHD0100023142	79916138	1	0.2727	0.479	2	0.07956	0.4079		1	BovineHD0100023142	1	2	DOM	6/5	193/69	0.1753		1	BovineHD0100023142	1	2	REC	0/11	58/204	0.1279
1	BovineHD0100023146	79938242	2	0.5909	0.3712	1	0.04447	2.447		1	BovineHD0100023146	2	1	DOM	10/1	159/105	0.05544		1	BovineHD0100023146	2	1	REC	3/8	37/227	0.2044
1	ARS-BFGL-NGS-19741	79957893	1	0.09091	0.3303	2	0.01849	0.2028		1	ARS-BFGL-NGS-19741	1	2	DOM	2/9	154/117	0.0138		1	ARS-BFGL-NGS-19741	1	2	REC	0/11	25/246	0.6067
1	BovineHD0100023165	79990596	2	0.1364	0.322	1	0.09815	0.3325		1	BovineHD0100023165	2	1	DOM	2/9	146/118	0.02645		1	BovineHD0100023165	2	1	REC	1/10	24/240	1
1	ARS-BFGL-NGS-1514	80021446	1	0.3182	0.2399	2	0.4465	1.479		1	ARS-BFGL-NGS-1514	1	2	DOM	6/5	115/156	0.5382		1	ARS-BFGL-NGS-1514	1	2	REC	1/10	15/256	0.4803
1	BovineHD0100023182	80037828	2	0.5909	0.4639	1	0.2795	1.669		1	BovineHD0100023182	2	1	DOM	9/2	191/72	0.7326		1	BovineHD0100023182	2	1	REC	4/7	53/210	0.2482
1	BovineHD0100023186	80051299	1	0.4545	0.3926	2	0.6575	1.289		1	BovineHD0100023186	1	2	DOM	8/3	175/95	0.7525		1	BovineHD0100023186	1	2	REC	2/9	37/233	0.654
1	BovineHD0100023190	80065210	1	0.4545	0.3234	2	0.2464	1.743		1	BovineHD0100023190	1	2	DOM	9/2	149/120	0.1207		1	BovineHD0100023190	1	2	REC	1/10	25/244	1
1	ARS-BFGL-NGS-79990	80070890	2	0.2727	0.2491	1	0.8033	1.131		1	ARS-BFGL-NGS-79990	2	1	DOM	5/6	117/154	1		1	ARS-BFGL-NGS-79990	2	1	REC	1/10	18/253	0.5424
1	BovineHD0100023210	80108636	2	0.1364	0.3657	1	0.0384	0.2739		1	BovineHD0100023210	2	1	DOM	3/8	159/109	0.05717		1	BovineHD0100023210	2	1	REC	0/11	37/231	0.3697
1	BovineHD0100023217	80140528	1	0.4545	0.2752	2	0.08837	2.195		1	BovineHD0100023217	1	2	DOM	7/4	127/131	0.3767		1	BovineHD0100023217	1	2	REC	3/8	15/243	0.02971
1	BovineHD0100023223	80185391	1	0.3182	0.2434	2	0.4503	1.45		1	BovineHD0100023223	1	2	DOM	6/5	114/153	0.5392		1	BovineHD0100023223	1	2	REC	1/10	16/251	0.507
1	BovineHD0100023235	80224613	2	0.4545	0.2708	1	0.08575	2.244		1	BovineHD0100023235	2	1	DOM	7/4	128/136	0.3704		1	BovineHD0100023235	2	1	REC	3/8	15/249	0.02801
1	BTA-38441-no-rs	80284430	1	0.5	0.4188	2	0.5116	1.388		1	BTA-38441-no-rs	1	2	DOM	7/4	183/88	0.753		1	BTA-38441-no-rs	1	2	REC	4/7	44/227	0.09756
1	BTB-00035080	80454120	2	0	0.02974	1	1	0		1	BTB-00035080	2	1	DOM	0/11	16/253	1		1	BTB-00035080	2	1	REC	0/11	0/269	1
[truncated: 71,752 more rows]
