# Supplementary material for: Genome-wide association analyses in dairy heifers highlight genes overlapping with mouse and human fertility and human health traits
Source: Research Square preprint supplement (doi:10.21203/rs.3.rs-6463477/v1), 2025-05-05
Supplement: Supplementary file 12 [file db30d3d2a0a321b6f7005024.xlsx]

## Sheet: Table_3
Additional file 5. Summary of association analysis for heifers that were culled from the herd due to infertility and health.
		P-value
Variant identifier	Position	Fisher's exact test	Dom / Rec	Gene	Near Gene
rs3423093953	1:124138614	3.01x10-5	2.30x10-5	-	-
rs43749018	1:124234169	2.78x10-5	1.77x10-5	-	-
rs135592668	1:126950096	1.33x10-6	1.18x10-6	TFDP2	-
rs135999525	1:134179453	2.91x10-5	3.87x10-5	EPHB1	-
rs133698224	1:139555009	ns	3.99x10-5	SH3BGR	-
rs133410098	1:150360069	1.73x10-5	2.10x10-5	-	SNORA72
rs109117962	1:151120755	1.21x10-5	ns	-	ENSBTAG00000062375
rs137700356	1:151164011	ns	4.81x10-5	ETS2	-
rs43713002	1:33560583	3.11x10-5	2.93x10-5	CADM2	-
rs110933273	1:5979118	1.56x10-5	4.86x10-5	-	-
rs43767288	1:63716985	ns	3.85x10-5	-	-
rs41658634	10:14415124	1.92x10-5	1.86x10-5	MAP2K5	-
rs3423093513	10:15551922	ns	3.15x10-5	CORO2B	-
rs43741350	11:22605594	ns	3.25x10-5	SLC8A1	-
rs137053723	11:55314730	3.30x10-5	ns	CTNNA2	-
rs41581784	12:11470110	1.20x10-6	ns	MTRF1	-
rs29012667	12:12012377	2.07x10-5	ns	VWA8	-
rs109186505	12:12091328	1.01x10-5	ns	-	ENSBTAG00000069491
rs109907807	12:12245826	4.30x10-5	ns	DGKH	-
rs43691605	12:12473832	2.77x10-5	ns	-	-
rs136890099	12:13591814	1.03x10-5	ns	ENOX1	-
rs41618427	12:15108440	2.36x10-6	5.81x10-7	-	NUFIP1
rs41582571	12:16559286	2.89x10-5	1.41x10-5	LRCH1	-
rs109260058	12:35777077	ns	3.89x10-5	XPO4	-
rs134744181	12:5346137	3.31x10-5	ns	-	-
rs109626146	12:80645474	2.99x10-6	1.88x10-6	-	-
rs110620960	13:21159548	1.51x10-6	4.45x10-6	MALRD1	-
rs29023180	13:21473454	4.43x10-7	2.19x10-6	PLXDC2	-
rs111010098	13:21720773	4.89x10-6	3.15x10-5	PLXDC2	-
rs41575449	13:22162978	8.51x10-6	1.86x10-5	NEBL	-
rs109348898	13:26372373	1.22x10-5	ns	-	-
rs110548459	13:28175417	1.91x10-5	ns	BEND7	-
rs133263801	13:28292060	4.96x10-5	ns	PRPF18	-
rs109193608	13:30428912	1.23x10-5	ns	-	-
rs110515076	13:30602429	4.48x10-5	ns	-	-
rs41627563	13:30636781	4.16x10-5	ns	-	ENSBTAG00000058926
rs109983109	13:32538695	3.01x10-5	ns	-	-
rs132987419	13:37335920	6.53x10-6	1.47x10-6	-	-
rs41688462	13:42126210	2.19x10-5	ns	CST8	-
rs3423368111	13:43433183	1.16x10-5	2.21x10-5	LOC112449293	-
rs41585373	13:52069828	ns	2.14x10-5	UBOX5	-
rs41700634	13:66817509	ns	8.98x10-6	VSTM2L	-
rs29025815	13:75604605	4.33x10-5	3.24x10-5	EYA2	-
rs137591751	13:81238195	ns	3.82x10-5	-	ENSBTAG00000065880
rs41627470	13:81605911	ns	2.57x10-6	CYP24A1	-
rs110324238	13:81646766	ns	2.24x10-5	-	PFDN4
rs109720559	13:82574013	ns	2.34x10-5	-	ENSBTAG00000062274
-	13:82593472	ns	2.56x10-5	-	ENSBTAG00000062274
rs42441151	13:82616878	ns	1.35x10-5	-	ENSBTAG00000062274
rs42730765	13:82944119	9.94x10-6	1.39x10-5	-	-
rs41602527	14:1423562	3.48x10-5	ns	LY6E	-
rs3423092932	14:1854457	5.43x10-6	1.15x10-5	ADGRB1	-
rs133876934	14:32995254	ns	1.47x10-5	-	-
rs136556795	14:33031367	3.42x10-5	6.21x10-6	-	-
rs137698269	14:3917528	5.25x10-6	2.75x10-5	-	-
rs109567472	14:4046383	1.89x10-5	2.86x10-5	-	ENSBTAG00000064865
rs41629750	14:810863	ns	3.62x10-5	PARP10	-
rs134323507	15:1183441	ns	3.60x10-5	-	-
rs41566637	15:36724876	3.69x10-6	1.46x10-6	-	-
rs29014612	16:19370230	3.84x10-5	ns	USH2A	-
rs108954365	16:19568001	ns	1.32x10-5	USH2A	-
rs137239652	16:23978490	4.89x10-6	7.86x10-7	-	-
rs133821646	17:2370851	3.72x10-5	ns	LOC112441988	-
rs109981365	17:68618815	1.92x10-5	ns	AP1B1	-
rs110463504	17:68924124	2.38x10-5	2.12x10-5	ASCC2	-
rs132682865	17:70047720	1.01x10-5	2.14x10-5	LIMK2	-
rs41859838	18:4424089	9.91x10-6	9.61x10-6	SYCE1L	-
rs29011610	18:4428953	1.54x10-6	7.61x10-6	SYCE1L	-
rs41636732	18:4605444	1.48x10-5	ns	ADAMTS18	-
rs134116687	18:55712105	1.79x10-5	2.26x10-5	-	TRPM4
rs41582489	18:55725572	2.93x10-6	2.65x10-6	LOC785907	-
rs109045973	18:62162015	7.04x10-6	3.41x10-5	TMEM150B	-
rs3423437717	18:63845221	1.52x10-6	1.13x10-6	SMIM17	-
rs110508237	18:64554144	3.30x10-5	2.96x10-5	-	ZNF304
rs136398464	18:64809695	9.77x10-6	1.39x10-5	-	ENSBTAG00000057653
rs41900308	18:64971452	1.10x10-5	2.54x10-5	LOC100124497	-
rs42924027	18:65078634	1.09x10-5	1.52x10-5	ENSBTAG00000038635	-
rs136967970	19:10501667	4.81x10-5	ns	-	-
rs109579864	19:12106647	3.84x10-6	8.92x10-6	BCAS3	-
rs41665397	19:12563320	8.16x10-7	2.35x10-5	-	-
rs110686148	19:13223983	1.46x10-5	ns	-	ENSBTAG00000000560
rs110887612	19:55732113	2.05x10-6	9.12x10-6	TRIM65	-
rs42673204	19:57002514	1.03x10-5	ns	LOC101906311	-
rs109623709	19:57231068	3.19x10-5	ns	LOC101907074	-
rs110036994	19:7717717	4.95x10-5	ns	TRIM25	-
rs109194627	19:8596154	2.22x10-5	ns	-	-
rs109373475	19:8730082	1.83x10-5	ns	CUEDC1	-
rs41667474	20:12136194	1.67x10-5	2.40x10-5	LOC107131559	-
rs41598451	20:16134026	1.85x10-5	2.96x10-5	-	ENSBTAG00000065962
rs109858762	20:2549449	2.92x10-5	3.62x10-5	KCNIP1	-
rs42520485	20:2699096	2.55x10-5	ns	GABRP	-
rs42794065	20:3241584	4.62x10-6	8.27x10-7	FGF18	-
rs110627799	20:4079529	4.58x10-5	1.08x10-5	-	U6
rs110433832	20:4422634	ns	1.58x10-5	NEURL1B	-
rs110513671	20:4516902	ns	1.91x10-5	-	-
rs42501206	20:46474260	3.27x10-5	ns	-	-
rs41581570	20:4655604	3.35x10-5	ns	ERGIC1	-
rs43757203	20:47271258	5.55x10-7	9.27x10-6	-	-
rs42262483	20:5633232	5.80x10-6	1.11x10-5	CPEB4	-
rs42263251	20:5695030	5.80x10-6	1.11x10-5	-	C5orf47
rs134731665	21:46304614	1.12x10-5	ns	-	-
rs109056407	21:46412392	7.16x10-6	1.01x10-5	-	-
rs110499399	21:46523206	1.97x10-5	ns	-	-
rs137474595	21:46587033	4.90x10-5	ns	-	-
rs110438897	22:23286762	1.21x10-5	ns	CNTN4	-
rs109275311	22:23609651	7.07x10-6	ns	CNTN4	-
rs42554556	22:24041674	2.10x10-6	ns	CNTN4	-
rs134134329	22:24378813	6.07x10-6	ns	-	-
rs41565671	22:37221156	1.34x10-5	2.56x10-5	PRICKLE2	-
rs136413433	22:963715	1.53x10-5	1.14x10-5	EGFR	-
rs110744293	23:12146460	2.87x10-5	ns	BTBD9	-
rs110860468	23:17227354	2.43x10-5	ns	-	ENSBTAG00000050989
rs29026684	23:17696083	4.89x10-5	3.47x10-5	CAPN11	-
rs41583931	24:11064065	ns	4.38x10-5	-	-
rs41257081	24:26063880	2.13x10-5	ns	DSC2	-
rs110489495	25:40246623	4.44x10-5	ns	-	ENSBTAG00000059451
rs110072536	25:40344012	7.34x10-6	ns	-	-
rs110519737	27:1908266	6.49x10-7	1.88x10-6	-	-
rs133955943	28:31910046	1.70x10-5	9.38x10-6	LRMDA	-
rs110236363	28:40662835	3.29x10-5	ns	GRID1	-
rs136280135	29:10014259	1.79x10-5	ns	-	DLG2
rs42156900	29:10060800	1.84x10-5	ns	DLG2	-
rs41991317	29:10158153	1.84x10-5	ns	DLG2	-
rs42159980	29:10258760	1.76x10-5	ns	DLG2	-
rs133546012	29:11230618	9.17x10-6	ns	DLG2	-
rs110411186	29:1461210	ns	4.26x10-5	DEUP1	-
rs135984630	29:15706087	ns	1.30x10-5	-	-
rs29022132	29:16200746	1.77x10-5	ns	-	-
rs110392437	29:16796262	3.01x10-5	ns	TENM4	-
rs135359671	29:16882756	2.10x10-5	ns	TENM4	-
rs109868969	29:17135246	5.05x10-6	ns	TENM4	-
rs109400388	29:19311833	3.28x10-5	ns	-	-
rs136226092	29:19332337	4.51x10-5	ns	-	-
rs42170441	29:20347171	1.61x10-5	ns	LUZP2	-
rs110252499	29:20397429	3.04x10-5	2.10x10-5	LUZP2	-
rs42517435	29:23276174	8.63x10-7	2.36x10-6	NELL1	-
rs42165802	29:34208123	ns	8.91x10-6	OPCML	-
rs3423094226	29:35951280	4.34x10-5	ns	-	-
rs42356858	4:29402377	ns	2.13x10-5	ABCB5	-
rs41572920	4:29426122	2.77x10-5	1.94x10-5	ABCB5	-
rs43382298	4:31715516	3.59x10-5	ns	FAM126A	-
rs109231323	5:101827622	3.02x10-5	ns	LOC101908561	-
rs109944456	5:106540440	2.18x10-5	ns	TSPAN11	-
rs109195477	5:106751379	7.88x10-6	5.54x10-6	-	TSPAN9
rs109833545	5:106784655	8.00x10-6	6.22x10-6	TEAD4	-
rs109408961	5:107017550	2.73x10-5	2.16x10-5	-	WASHC1
rs109966461	5:107060379	5.72x10-6	3.11x10-5	IQSEC3	-
rs109892864	5:109923576	3.39x10-5	ns	PLA2G6	-
rs109147973	5:111344131	1.53x10-5	ns	-	-
rs379201999	5:119239442	3.30x10-5	3.71x10-5	BRD1	-
rs3423094263	5:120055511	3.53x10-5	ns	RABL2B	-
rs41595953	6:40780850	3.85x10-5	ns	KCNIP4	-
rs109147043	6:52499833	ns	3.67x10-5	-	-
rs3423252931	7:101956846	4.08x10-5	ns	PAM	-
rs136701038	7:102430585	ns	1.39x10-5	-	ENSBTAG00000064643
rs3423279476	8:105273558	3.42x10-5	ns	-	-
rs109701320	8:14639815	3.55x10-5	ns	-	-
rs109277159	8:16181915	4.16x10-5	ns	LINGO2	-
rs110532998	8:3560707	1.91x10-5	ns	-	-
rs42284584	8:47039478	1.69x10-5	2.46x10-5	-	TRPM3
rs43713253	8:9281650	ns	3.07x10-5	-	-
rs110416891	9:11158693	1.89x10-5	ns	RIMS1	-
rs42491470	9:13634073	2.90x10-5	2.07x10-5	-	-
rs42250917	9:20753589	2.80x10-6	8.34x10-6	-	-
rs41570419	9:20808486	5.38x10-6	3.75x10-6	-	-
rs137774454	9:39892919	ns	2.90x10-6	METTL24	-

## Sheet: Sheet3
4.429e-07	4.43x10		4.43x10-7					2.186e-06	2.19x10	6	2.19x10-6
5.545e-07	5.55x10		5.55x10-7					9.266e-06	9.27x10	6	9.27x10-6
6.493e-07	6.49x10		6.49x10-7					1.881e-06	1.88x10	6	1.88x10-6
8.156e-07	8.16x10		8.16x10-7					2.35e-05	2.35x10	5	2.35x10-5
8.631e-07	8.63x10		8.63x10-7					2.363e-06	2.36x10	6	2.36x10-6
1.203e-06	1.20x10		1.20x10-6
1.333e-06	1.33x10		1.33x10-6					1.183e-06	1.18x10	6	1.18x10-6
1.509e-06	1.51x10		1.51x10-6					4.447e-06	4.45x10	6	4.45x10-6
1.518e-06	1.52x10		1.52x10-6					1.128e-06	1.13x10	6	1.13x10-6
1.544e-06	1.54x10		1.54x10-6					7.612e-06	7.61x10	6	7.61x10-6
2.052e-06	2.05x10		2.05x10-6					9.123e-06	9.12x10	6	9.12x10-6
2.099e-06	2.10x10		2.10x10-6
2.36e-06	2.36x10		2.36x10-6					5.807e-07	5.81x10	7	5.81x10-7
2.802e-06	2.80x10		2.80x10-6					8.343e-06	8.34x10	6	8.34x10-6
2.927e-06	2.93x10		2.93x10-6					2.65e-06	2.65x10	6	2.65x10-6
2.986e-06	2.99x10		2.99x10-6					1.875e-06	1.88x10	6	1.88x10-6
3.688e-06	3.69x10		3.69x10-6					1.457e-06	1.46x10	6	1.46x10-6
3.84e-06	3.84x10		3.84x10-6					8.92e-06	8.92x10	6	8.92x10-6
4.619e-06	4.62x10		4.62x10-6					8.269e-07	8.27x10	7	8.27x10-7
4.885e-06	4.89x10		4.89x10-6					3.153e-05	3.15x10	5	3.15x10-5
4.885e-06	4.89x10		4.89x10-6					7.859e-07	7.86x10	7	7.86x10-7
5.046e-06	5.05x10		5.05x10-6
5.251e-06	5.25x10		5.25x10-6					2.75e-05	2.75x10	5	2.75x10-5
5.375e-06	5.38x10		5.38x10-6					3.752e-06	3.75x10	6	3.75x10-6
5.426e-06	5.43x10		5.43x10-6					1.15e-05	1.15x10	5	1.15x10-5
5.72e-06	5.72x10		5.72x10-6					3.105e-05	3.11x10	5	3.11x10-5
5.798e-06	5.80x10		5.80x10-6					1.106e-05	1.11x10	5	1.11x10-5
5.798e-06	5.80x10		5.80x10-6					1.106e-05	1.11x10	5	1.11x10-5
6.067e-06	6.07x10		6.07x10-6
6.533e-06	6.53x10		6.53x10-6					1.469e-06	1.47x10	6	1.47x10-6
7.038e-06	7.04x10		7.04x10-6					3.407e-05	3.41x10	5	3.41x10-5
7.07e-06	7.07x10		7.07x10-6
7.158e-06	7.16x10		7.16x10-6					1.014e-05	1.01x10	5	1.01x10-5
7.343e-06	7.34x10		7.34x10-6
7.884e-06	7.88x10		7.88x10-6					5.539e-06	5.54x10	6	5.54x10-6
7.995e-06	8.00x10		8.00x10-6					6.223e-06	6.22x10	6	6.22x10-6
8.51e-06	8.51x10		8.51x10-6					1.862e-05	1.86x10	5	1.86x10-5
9.167e-06	9.17x10		9.17x10-6
9.772e-06	9.77x10		9.77x10-6					1.389e-05	1.39x10	5	1.39x10-5
9.911e-06	9.91x10		9.91x10-6					9.607e-06	9.61x10	6	9.61x10-6
9.943e-06	9.94x10		9.94x10-6					1.389e-05	1.39x10	5	1.39x10-5
1.01e-05	1.01x10		1.01x10	1.01x10-5	1.01x10-5
1.012e-05	1.01x10		1.01x10	1.01x10-5	1.01x10-5			2.138e-05	2.14x10	5	2.14x10-5
1.032e-05	1.03x10		1.03x10	1.03x10-5	1.03x10-5
1.033e-05	1.03x10		1.03x10	1.03x10-5	1.03x10-5
1.085e-05	1.09x10		1.09x10	1.09x10-5	1.09x10-5			1.516e-05	1.52x10	5	1.52x10-5
1.095e-05	1.10x10		1.10x10	1.10x10-5	1.10x10-5			2.544e-05	2.54x10	5	2.54x10-5
1.122e-05	1.12x10		1.12x10	1.12x10-5	1.12x10-5
1.16e-05	1.16x10		1.16x10	1.16x10-5	1.16x10-5			2.213e-05	2.21x10	5	2.21x10-5
1.209e-05	1.21x10		1.21x10	1.21x10-5	1.21x10-5
1.213e-05	1.21x10		1.21x10	1.21x10-5	1.21x10-5
1.218e-05	1.22x10		1.22x10	1.22x10-5	1.22x10-5
1.229e-05	1.23x10		1.23x10	1.23x10-5	1.23x10-5
1.336e-05	1.34x10		1.34x10	1.34x10-5	1.34x10-5			2.557e-05	2.56x10	5	2.56x10-5
1.46e-05	1.46x10		1.46x10	1.46x10-5	1.46x10-5
1.48e-05	1.48x10		1.48x10	1.48x10-5	1.48x10-5
1.532e-05	1.53x10		1.53x10	1.53x10-5	1.53x10-5
1.532e-05	1.53x10		1.53x10	1.53x10-5	1.53x10-5			1.135e-05	1.14x10	5	1.14x10-5
1.556e-05	1.56x10		1.56x10	1.56x10-5	1.56x10-5			4.859e-05	4.86x10	5	4.86x10-5
1.612e-05	1.61x10		1.61x10	1.61x10-5	1.61x10-5
1.668e-05	1.67x10		1.67x10	1.67x10-5	1.67x10-5			2.399e-05	2.40x10	5	2.40x10-5
1.686e-05	1.69x10		1.69x10	1.69x10-5	1.69x10-5			2.457e-05	2.46x10	5	2.46x10-5
1.703e-05	1.70x10		1.70x10	1.70x10-5	1.70x10-5			9.382e-06	9.38x10	6	9.38x10-6
1.725e-05	1.73x10		1.73x10	1.73x10-5	1.73x10-5			2.097e-05	2.10x10	5	2.10x10-5
1.763e-05	1.76x10		1.76x10	1.76x10-5	1.76x10-5
1.77e-05	1.77x10		1.77x10	1.77x10-5	1.77x10-5
1.787e-05	1.79x10		1.79x10	1.79x10-5	1.79x10-5			2.261e-05	2.26x10	5	2.26x10-5
1.787e-05	1.79x10		1.79x10	1.79x10-5	1.79x10-5
1.829e-05	1.83x10		1.83x10	1.83x10-5	1.83x10-5
1.841e-05	1.84x10		1.84x10	1.84x10-5	1.84x10-5
1.841e-05	1.84x10		1.84x10	1.84x10-5	1.84x10-5
1.848e-05	1.85x10		1.85x10	1.85x10-5	1.85x10-5			2.957e-05	2.96x10	5	2.96x10-5
1.887e-05	1.89x10		1.89x10	1.89x10-5	1.89x10-5
1.894e-05	1.89x10		1.89x10	1.89x10-5	1.89x10-5			2.862e-05	2.86x10	5	2.86x10-5
1.908e-05	1.91x10		1.91x10	1.91x10-5	1.91x10-5
1.911e-05	1.91x10		1.91x10	1.91x10-5	1.91x10-5
1.916e-05	1.92x10		1.92x10	1.92x10-5	1.92x10-5
1.922e-05	1.92x10		1.92x10	1.92x10-5	1.92x10-5			1.862e-05	1.86x10	5	1.86x10-5
1.968e-05	1.97x10		1.97x10	1.97x10-5	1.97x10-5
2.074e-05	2.07x10		2.07x10	2.07x10-5	2.07x10-5
2.098e-05	2.10x10		2.10x10	2.10x10-5	2.10x10-5
2.132e-05	2.13x10		2.13x10	2.13x10-5	2.13x10-5
2.18e-05	2.18x10		2.18x10	2.18x10-5	2.18x10-5
2.185e-05	2.19x10		2.19x10	2.19x10-5	2.19x10-5
2.223e-05	2.22x10		2.22x10	2.22x10-5	2.22x10-5
2.38e-05	2.38x10		2.38x10	2.38x10-5	2.38x10-5			2.123e-05	2.12x10	5	2.12x10-5
2.425e-05	2.43x10		2.43x10	2.43x10-5	2.43x10-5
2.552e-05	2.55x10		2.55x10	2.55x10-5	2.55x10-5
2.733e-05	2.73x10		2.73x10	2.73x10-5	2.73x10-5			2.155e-05	2.16x10	5	2.16x10-5
2.767e-05	2.77x10		2.77x10	2.77x10-5	2.77x10-5
2.767e-05	2.77x10		2.77x10	2.77x10-5	2.77x10-5			1.936e-05	1.94x10	5	1.94x10-5
2.776e-05	2.78x10		2.78x10	2.78x10-5	2.78x10-5			1.774e-05	1.77x10	5	1.77x10-5
2.871e-05	2.87x10		2.87x10	2.87x10-5	2.87x10-5
2.892e-05	2.89x10		2.89x10	2.89x10-5	2.89x10-5			1.414e-05	1.41x10	5	1.41x10-5
2.902e-05	2.90x10		2.90x10	2.90x10-5	2.90x10-5			2.07e-05	2.07x10	5	2.07x10-5
2.91e-05	2.91x10		2.91x10	2.91x10-5	2.91x10-5			3.865e-05	3.87x10	5	3.87x10-5
2.921e-05	2.92x10		2.92x10	2.92x10-5	2.92x10-5			3.622e-05	3.62x10	5	3.62x10-5
3.005e-05	3.01x10		3.01x10	3.01x10-5	3.01x10-5
3.012e-05	3.01x10		3.01x10	3.01x10-5	3.01x10-5
3.012e-05	3.01x10		3.01x10	3.01x10-5	3.01x10-5			2.299e-05	2.30x10	5	2.30x10-5
3.019e-05	3.02x10		3.02x10	3.02x10-5	3.02x10-5
3.044e-05	3.04x10		3.04x10	3.04x10-5	3.04x10-5			2.104e-05	2.10x10	5	2.10x10-5
3.111e-05	3.11x10		3.11x10	3.11x10-5	3.11x10-5			2.927e-05	2.93x10	5	2.93x10-5
3.187e-05	3.19x10		3.19x10	3.19x10-5	3.19x10-5
3.267e-05	3.27x10		3.27x10	3.27x10-5	3.27x10-5
3.275e-05	3.28x10		3.28x10	3.28x10-5	3.28x10-5
3.288e-05	3.29x10		3.29x10	3.29x10-5	3.29x10-5
3.302e-05	3.30x10		3.30x10	3.30x10-5	3.30x10-5			2.957e-05	2.96x10	5	2.96x10-5
3.302e-05	3.30x10		3.30x10	3.30x10-5	3.30x10-5			3.712e-05	3.71x10	5	3.71x10-5
3.303e-05	3.30x10		3.30x10	3.30x10-5	3.30x10-5
3.305e-05	3.31x10		3.31x10	3.31x10-5	3.31x10-5
3.35e-05	3.35x10		3.35x10	3.35x10-5	3.35x10-5
3.385e-05	3.39x10		3.39x10	3.39x10-5	3.39x10-5
3.415e-05	3.42x10		3.42x10	3.42x10-5	3.42x10-5
3.415e-05	3.42x10		3.42x10	3.42x10-5	3.42x10-5			6.21e-06	6.21x10	6	6.21x10-6
3.478e-05	3.48x10		3.48x10	3.48x10-5	3.48x10-5
3.531e-05	3.53x10		3.53x10	3.53x10-5	3.53x10-5
3.551e-05	3.55x10		3.55x10	3.55x10-5	3.55x10-5
3.586e-05	3.59x10		3.59x10	3.59x10-5	3.59x10-5
3.718e-05	3.72x10		3.72x10	3.72x10-5	3.72x10-5
3.842e-05	3.84x10		3.84x10	3.84x10-5	3.84x10-5
3.854e-05	3.85x10		3.85x10	3.85x10-5	3.85x10-5
4.084e-05	4.08x10		4.08x10	4.08x10-5	4.08x10-5
4.155e-05	4.16x10		4.16x10	4.16x10-5	4.16x10-5
4.156e-05	4.16x10		4.16x10	4.16x10-5	4.16x10-5
4.297e-05	4.30x10		4.30x10	4.30x10-5	4.30x10-5
4.333e-05	4.33x10		4.33x10	4.33x10-5	4.33x10-5			3.235e-05	3.24x10	5	3.24x10-5
4.341e-05	4.34x10		4.34x10	4.34x10-5	4.34x10-5
4.437e-05	4.44x10		4.44x10	4.44x10-5	4.44x10-5
4.481e-05	4.48x10		4.48x10	4.48x10-5	4.48x10-5
4.514e-05	4.51x10		4.51x10	4.51x10-5	4.51x10-5
4.579e-05	4.58x10		4.58x10	4.58x10-5	4.58x10-5			1.075e-05	1.08x10	5	1.08x10-5
4.811e-05	4.81x10		4.81x10	4.81x10-5	4.81x10-5
4.888e-05	4.89x10		4.89x10	4.89x10-5	4.89x10-5			3.465e-05	3.47x10	5	3.47x10-5
4.895e-05	4.90x10		4.90x10	4.90x10-5	4.90x10-5
4.945e-05	4.95x10		4.95x10	4.95x10-5	4.95x10-5
4.959e-05	4.96x10		4.96x10	4.96x10-5	4.96x10-5
4.996e-05	5.00x10		5.00x10	5.00x10-5	5.00x10-5			2.565e-06	2.57x10	6	2.57x10-6
								2.901e-06	2.90x10	6	2.90x10-6
								8.909e-06	8.91x10	6	8.91x10-6
								8.977e-06	8.98x10	6	8.98x10-6
								1.296e-05	1.30x10	5	1.30x10-5
								1.319e-05	1.32x10	5	1.32x10-5
								1.35e-05	1.35x10	5	1.35x10-5
								1.394e-05	1.39x10	5	1.39x10-5
								1.465e-05	1.47x10	5	1.47x10-5
								1.58e-05	1.58x10	5	1.58x10-5
								1.913e-05	1.91x10	5	1.91x10-5
								2.128e-05	2.13x10	5	2.13x10-5
								2.143e-05	2.14x10	5	2.14x10-5
								2.241e-05	2.24x10	5	2.24x10-5
								2.342e-05	2.34x10	5	2.34x10-5
								2.563e-05	2.56x10	5	2.56x10-5
								3.067e-05	3.07x10	5	3.07x10-5
								3.148e-05	3.15x10	5	3.15x10-5
								3.248e-05	3.25x10	5	3.25x10-5
								3.602e-05	3.60x10	5	3.60x10-5
								3.622e-05	3.62x10	5	3.62x10-5
								3.666e-05	3.67x10	5	3.67x10-5
								3.821e-05	3.82x10	5	3.82x10-5
								3.846e-05	3.85x10	5	3.85x10-5
								3.887e-05	3.89x10	5	3.89x10-5
								3.99e-05	3.99x10	5	3.99x10-5
								4.256e-05	4.26x10	5	4.26x10-5
								4.382e-05	4.38x10	5	4.38x10-5
								4.805e-05	4.81x10	5	4.81x10-5
