# Supplementary material for: Genome-wide association analyses in dairy heifers highlight genes overlapping with mouse and human fertility and human health traits
Source: Research Square preprint supplement (doi:10.21203/rs.3.rs-6463477/v1), 2025-05-05
Supplement: Supplementary file 14 [file fec5872dd248c1e26c3f8b04.xlsx]

## Sheet: qtl_snps_genes
Additional file 8. Annotation of SNPs based on Animal QTLdb.
CHR	BP	chr	database	QTL_type	start_pos	end_pos	extra_info
1	66862192	1	Animal QTLdb	Health_Association	66862190	66862194	QTL_ID=159986;Name=Bovine respiratory disease susceptibility;Abbrev=;PUBMED_ID=30229962;trait_ID=1494;BaseTrait=Bovine respiratory disease susceptibility;;Coord_src=SNP;FlankMarker=rs29019349;breed=charolais,hereford,red angus,Angus;CMO_name=disease process measurement;Map_Type=Genome;Marker_Type=SNP;P-value=0.0166;gene_ID=617104;gene_IDsrc=NCBIgene
1	66862192	1	Animal QTLdb	Health_Association	66862190	66862194	QTL_ID=159987;Name=Bovine respiratory disease susceptibility;Abbrev=;PUBMED_ID=30229962;trait_ID=1494;BaseTrait=Bovine respiratory disease susceptibility;;Coord_src=SNP;FlankMarker=rs29019349;breed=charolais,hereford,red angus,Angus;CMO_name=disease process measurement;Map_Type=Genome;Marker_Type=SNP;P-value=0.0225;gene_ID=617104;gene_IDsrc=NCBIgene
14	810863	14	Animal QTLdb	Health_Association	810861	810865	QTL_ID=96407;Name=Bovine tuberculosis susceptibility;Abbrev=;PUBMED_ID=26960806;trait_ID=1504;BaseTrait=Bovine tuberculosis susceptibility;;Coord_src=SNP;FlankMarker=rs41629750;breed=holstein;CMO_name=disease process measurement;Map_Type=Genome;Marker_Type=SNP;Model=Mendelian;Test_Base=Experiment-wise;Significance=Significant;Bayes-value=13.06
14	810863	14	Animal QTLdb	Health_Association	810861	810865	QTL_ID=179885;Name=Ketosis;Abbrev=;PUBMED_ID=31311492;trait_ID=1707;BaseTrait=Ketosis;TraitReprtNM=subclinical ketosis;;Coord_src=SNP;FlankMarker=rs41629750;breed=holstein;Map_Type=Genome;Marker_Type=SNP;Model=Mendelian;Test_Base=Genome-wise;Significance=Significant
9	13634073	9	Animal QTLdb	Reproduction_Association	13634071	13634075	QTL_ID=181633;Name=Stayability;Abbrev=;PUBMED_ID=29471369;trait_ID=1843;BaseTrait=Stayability;;Coord_src=SNP;FlankMarker=rs42491470;breed=red angus;Map_Type=Genome;Marker_Type=SNP
13	30428912	13	Animal QTLdb	Reproduction_Association	30428910	30428914	QTL_ID=14755;Name=Fertility index;Abbrev=;PUBMED_ID=20477799;trait_ID=1412;BaseTrait=Fertility index;TraitReprtNM=Fertility index;;Coord_src=SNP;FlankMarker=rs109193608;breed=holstein;VTO_name=female fertility trait;CMO_name=reproduction measurement;Map_Type=Genome;Marker_Type=SNP;Model=Mendelian;Test_Base=Chromosome-wise;Significance=Significant;P-value=<0.05
13	30428912	13	Animal QTLdb	Reproduction_Association	30428910	30428914	QTL_ID=138472;Name=Interval from first to last insemination;Abbrev=;PUBMED_ID=28814769;trait_ID=1195;BaseTrait=Interval from first to last insemination;TraitVariant=interval between first and last insemination (cows);;Coord_src=SNP;FlankMarker=rs109193608;breed=holstein;VTO_name=female fertility trait;Map_Type=Genome;Marker_Type=SNP;Model=Mendelian;Test_Base=Experiment-wise;Significance=Significa…
13	30636781	13	Animal QTLdb	Reproduction_Association	30636779	30636783	QTL_ID=14756;Name=Interval to first estrus after calving;Abbrev=;PUBMED_ID=20477799;trait_ID=1169;BaseTrait=Interval to first estrus after calving;TraitVariant=first service period;;Coord_src=SNP;FlankMarker=rs41627563;breed=holstein;VTO_name=female fertility trait;Map_Type=Genome;Marker_Type=SNP;Model=Mendelian;Test_Base=Chromosome-wise;Significance=Significant;P-value=<0.05
13	32538695	13	Animal QTLdb	Reproduction_Association	32538693	32538697	QTL_ID=138478;Name=Interval to first estrus after calving;Abbrev=;PUBMED_ID=28814769;trait_ID=1169;BaseTrait=Interval to first estrus after calving;TraitVariant=first service period;;Coord_src=SNP;FlankMarker=rs109983109;breed=holstein;VTO_name=female fertility trait;Map_Type=Genome;Marker_Type=SNP;Model=Mendelian;Test_Base=Experiment-wise;Significance=Significant;P-value=<0.05;Variance=0.66%
13	32538695	13	Animal QTLdb	Reproduction_Association	32538693	32538697	QTL_ID=138479;Name=Interval from first to last insemination;Abbrev=;PUBMED_ID=28814769;trait_ID=1195;BaseTrait=Interval from first to last insemination;TraitVariant=interval between first and last insemination (cows);;Coord_src=SNP;FlankMarker=rs109983109;breed=holstein;VTO_name=female fertility trait;Map_Type=Genome;Marker_Type=SNP;Model=Mendelian;Test_Base=Experiment-wise;Significance=Significa…
18	62162015	18	Animal QTLdb	Reproduction_Association	62162013	62162017	QTL_ID=212862;Name=Inseminations per conception;Abbrev=;PUBMED_ID=32650431;trait_ID=1070;BaseTrait=Inseminations per conception;TraitReprtNM=number of services per conception;;Coord_src=SNP;FlankMarker=rs109045973;breed=holstein;VTO_name=fertility trait;Map_Type=Genome;Marker_Type=SNP;Model=Mendelian;Test_Base=Genome-wise;Significance=Significant;P-value=<0.03;gene_ID=515527;gene_IDsrc=NCBIgene
19	12563320	19	Animal QTLdb	Reproduction_Association	12563318	12563322	QTL_ID=107021;Name=Pregnancy rate;Abbrev=;PUBMED_ID=27209127;trait_ID=1077;BaseTrait=Pregnancy rate;TraitVariant=daughter pregnancy rate;;Coord_src=SNP;FlankMarker=rs41665397;breed=holstein;VTO_name=fertility trait;Map_Type=Genome;Marker_Type=SNP;Model=Mendelian;Test_Base=Comparison-wise;Significance=Significant;P-value=8.81E-04
22	37221156	22	Animal QTLdb	Reproduction_Association	37221154	37221158	QTL_ID=107033;Name=Pregnancy rate;Abbrev=;PUBMED_ID=27209127;trait_ID=1077;BaseTrait=Pregnancy rate;TraitVariant=daughter pregnancy rate;;Coord_src=SNP;FlankMarker=rs41565671;breed=holstein;VTO_name=fertility trait;Map_Type=Genome;Marker_Type=SNP;Model=Mendelian;Test_Base=Comparison-wise;Significance=Significant;P-value=3.53E-05
29	10014259	29	Animal QTLdb	Reproduction_Association	10014257	10014261	QTL_ID=177314;Name=Conception rate;Abbrev=;PUBMED_ID=31299913;trait_ID=1075;BaseTrait=Conception rate;TraitVariant=sire conception rate;;Coord_src=SNP;FlankMarker=rs136280135;breed=holstein;VTO_name=fertility trait;Map_Type=Genome;Marker_Type=SNP;Model=Mendelian;Test_Base=Comparison-wise;Significance=Significant;P-value=7.64E-13
22	23286762	22	Animal QTLdb	Reproduction_QTL	23286760	23286764	QTL_ID=138533;Name=Calving to conception interval;Abbrev=;PUBMED_ID=28814769;trait_ID=1475;BaseTrait=Calving to conception interval;TraitReprtNM=service period;;Coord_src=SNP;FlankMarker=rs110438897,rs110438897,rs42003034;breed=holstein;VTO_name=female fertility trait;Map_Type=Genome;Marker_Type=SNP;Model=Mendelian;Test_Base=Chromosome-wise;Significance=Significant;P-value=<0.05
22	24041674	22	Animal QTLdb	Reproduction_QTL	24002842	24995229	QTL_ID=258519;Name=Multiple birth;Abbrev=;PUBMED_ID=35748198;trait_ID=1078;BaseTrait=Multiple birth;TraitVariant=maternal multiple birth;;Coord_src=Reported Coordinates;FlankMarker=rs42007624;breed=braunvieh;VTO_name=single birth offspring quantity;Map_Type=Genome;Marker_Type=SNP;Significance=Significant;Variance=2.36%
22	24378813	22	Animal QTLdb	Reproduction_QTL	24002842	24995229	QTL_ID=258519;Name=Multiple birth;Abbrev=;PUBMED_ID=35748198;trait_ID=1078;BaseTrait=Multiple birth;TraitVariant=maternal multiple birth;;Coord_src=Reported Coordinates;FlankMarker=rs42007624;breed=braunvieh;VTO_name=single birth offspring quantity;Map_Type=Genome;Marker_Type=SNP;Significance=Significant;Variance=2.36%
